# Supplementary material
Source: Research Square preprint supplement (doi:10.21203/rs.3.rs-9052155/v1)
Supplement: Supplementary file 1 [file 06f6a416440b43e1685cd74e.xlsx]

## Sheet: S12a-c
Supplementary Table S12a
The ratio of fungi to bacteria absolute abundances quantified by the ratio of ITS2 gene copies per gram of soil to the 16S rRNA gene copies per gram of soil measured from qPCR
Variation	Soil_type	Depth	mean_F_B	sc_F_B
Brassica/Grass	Luvisol	Subsoil	0.0064007	6.40 x 10^-3
Brassica/Grass	Luvisol	Topsoil	0.00535046	5.35 x 10^-3
Brassica/Grass	Phaeozem	Subsoil	0.00165422	1.65 x 10^-3
Brassica/Grass	Phaeozem	Topsoil	0.0197906	19.79 x 10^-3
Brassica/Grass	Podzol	Subsoil	0.00338369	3.38 x 10^-3
Brassica/Grass	Podzol	Topsoil	0.00474977	4.75 x 10^-3
Fallow	Luvisol	Subsoil	0.00346932	3.47 x 10^-3
Fallow	Luvisol	Topsoil	0.00883897	8.84 x 10^-3
Fallow	Phaeozem	Subsoil	0.0014316	1.43 x 10^-3
Fallow	Phaeozem	Topsoil	0.0112432	11.24 x 10^-3
Fallow	Podzol	Subsoil	0.0132995	13.30 x 10^-3
Fallow	Podzol	Topsoil	0.0079733	7.97 x 10^-3
Legume/Grass	Luvisol	Subsoil	0.00333616	3.34 x 10^-3
Legume/Grass	Luvisol	Topsoil	0.0107614	10.76 x 10^-3
Legume/Grass	Phaeozem	Subsoil	0.00101055	1.01 x 10^-3
Legume/Grass	Phaeozem	Topsoil	0.0127468	12.75 x 10^-3
Legume/Grass	Podzol	Subsoil	0.00130335	1.30 x 10^-3
Legume/Grass	Podzol	Topsoil	0.00412051	4.12 x 10^-3
Supplementary Table S12b
The ratio of fungi to bacteria proteome contributions quantified by the ratio of the LFQ intensities of fungal/bacterial proteins only if they were identified from both organismal levels and we only compared proteins from the biggest fungal phyla (Ascomycota) and the two biggest bacterial phyla (Pseudomonadota and Actinomycetota)
Protein_Description	Variation	Site	Depth	Condition	EC	Phylum_Bacteria	mean_Log2_intensity_bacteria	Phylum_Fungi	mean_Log2_intensity_fungi	F_by_B	logFB
6-phosphogluconolactonase	Brassica/Grass	Podzol	Subsoil	Drought	3.1.1.31	Pseudomonadota	7.41078	Ascomycota	10.748	28.1397	3.3372
6-phosphogluconolactonase	Brassica/Grass	Podzol	Subsoil	Drought	3.1.1.31	Actinomycetota	10.7609	Ascomycota	10.748	0.987145	-0.0129383
6-phosphogluconolactonase	Brassica/Grass	Podzol	Subsoil	Rainfall-fed	3.1.1.31	Actinomycetota	12.142	Ascomycota	11.1925	0.386919	-0.94954
6-phosphogluconolactonase	Brassica/Grass	Podzol	Subsoil	Rainfall-fed	3.1.1.31	Pseudomonadota	6.16891	Ascomycota	11.1925	151.954	5.02358
6-phosphogluconolactonase	Brassica/Grass	Podzol	Topsoil	Drought	3.1.1.31	Actinomycetota	11.8003	Ascomycota	7.94625	0.0211948	-3.854
6-phosphogluconolactonase	Brassica/Grass	Podzol	Topsoil	Drought	3.1.1.31	Pseudomonadota	10.8845	Ascomycota	7.94625	0.052958	-2.93826
6-phosphogluconolactonase	Brassica/Grass	Podzol	Topsoil	Rainfall-fed	3.1.1.31	Actinomycetota	7.45785	Ascomycota	9.73293	9.72873	2.27508
6-phosphogluconolactonase	Brassica/Grass	Podzol	Topsoil	Rainfall-fed	3.1.1.31	Pseudomonadota	6.67477	Ascomycota	9.73293	21.2883	3.05816
6-phosphogluconolactonase	Fallow	Podzol	Subsoil	Drought	3.1.1.31	Pseudomonadota	9.09191	Ascomycota	9.19542	1.10906	0.103516
6-phosphogluconolactonase	Fallow	Podzol	Subsoil	Drought	3.1.1.31	Actinomycetota	8.36027	Ascomycota	9.19542	2.30516	0.83515
6-phosphogluconolactonase	Fallow	Podzol	Subsoil	Rainfall-fed	3.1.1.31	Actinomycetota	3.23997	Ascomycota	11.3772	3419.3	8.13719
6-phosphogluconolactonase	Fallow	Podzol	Subsoil	Rainfall-fed	3.1.1.31	Pseudomonadota	6.08084	Ascomycota	11.3772	199.602	5.29633
6-phosphogluconolactonase	Fallow	Podzol	Topsoil	Drought	3.1.1.31	Actinomycetota	6.16306	Ascomycota	4.56589	0.202468	-1.59717
6-phosphogluconolactonase	Fallow	Podzol	Topsoil	Drought	3.1.1.31	Pseudomonadota	9.12664	Ascomycota	4.56589	0.0104543	-4.56075
6-phosphogluconolactonase	Fallow	Podzol	Topsoil	Rainfall-fed	3.1.1.31	Actinomycetota	7.64376	Ascomycota	8.71446	2.91741	1.0707
6-phosphogluconolactonase	Fallow	Podzol	Topsoil	Rainfall-fed	3.1.1.31	Pseudomonadota	10.3357	Ascomycota	8.71446	0.197645	-1.62128
6-phosphogluconolactonase	Legume/Grass	Podzol	Subsoil	Drought	3.1.1.31	Actinomycetota	5.28798	Ascomycota	11.6456	576.876	6.35763
6-phosphogluconolactonase	Legume/Grass	Podzol	Subsoil	Drought	3.1.1.31	Pseudomonadota	3.79994	Ascomycota	11.6456	2554.63	7.84566
6-phosphogluconolactonase	Legume/Grass	Podzol	Subsoil	Rainfall-fed	3.1.1.31	Actinomycetota	6.48339	Ascomycota	11.637	173.047	5.15356
6-phosphogluconolactonase	Legume/Grass	Podzol	Subsoil	Rainfall-fed	3.1.1.31	Pseudomonadota	4.48953	Ascomycota	11.637	1270.83	7.14742
6-phosphogluconolactonase	Legume/Grass	Podzol	Topsoil	Rainfall-fed	3.1.1.31	Actinomycetota	9.21772	Ascomycota	8.52389	0.499656	-0.693834
6-phosphogluconolactonase	Legume/Grass	Podzol	Topsoil	Rainfall-fed	3.1.1.31	Pseudomonadota	9.65207	Ascomycota	8.52389	0.323621	-1.12818
aspartokinase	Brassica/Grass	Luvisol	Subsoil	Drought	2.7.2.4	Pseudomonadota	10.4297	Ascomycota	9.92855	0.605849	-0.501125
aspartokinase	Brassica/Grass	Luvisol	Subsoil	Rainfall-fed	2.7.2.4	Pseudomonadota	4.34551	Ascomycota	11.0561	821.06	6.7106
aspartokinase	Brassica/Grass	Luvisol	Topsoil	Drought	2.7.2.4	Pseudomonadota	8.73719	Ascomycota	11.0761	10.3699	2.3389
aspartokinase	Brassica/Grass	Luvisol	Topsoil	Rainfall-fed	2.7.2.4	Pseudomonadota	7.23872	Ascomycota	11.3597	61.617	4.12094
aspartokinase	Brassica/Grass	Phaeozem	Subsoil	Drought	2.7.2.4	Pseudomonadota	9.82119	Ascomycota	6.76065	0.0468623	-3.06054
aspartokinase	Brassica/Grass	Phaeozem	Subsoil	Rainfall-fed	2.7.2.4	Pseudomonadota	5.93454	Ascomycota	6.0701	1.14518	0.135559
aspartokinase	Brassica/Grass	Phaeozem	Topsoil	Drought	2.7.2.4	Pseudomonadota	10.4988	Ascomycota	11.3636	2.37447	0.864773
aspartokinase	Brassica/Grass	Phaeozem	Topsoil	Rainfall-fed	2.7.2.4	Pseudomonadota	10.538	Ascomycota	7.36556	0.0419014	-3.17244
aspartokinase	Brassica/Grass	Podzol	Subsoil	Drought	2.7.2.4	Pseudomonadota	8.5527	Ascomycota	7.85215	0.496315	-0.700545
aspartokinase	Brassica/Grass	Podzol	Subsoil	Rainfall-fed	2.7.2.4	Pseudomonadota	9.56313	Ascomycota	8.00924	0.211423	-1.55389
aspartokinase	Brassica/Grass	Podzol	Topsoil	Drought	2.7.2.4	Pseudomonadota	7.22756	Ascomycota	11.402	65.0027	4.17443
aspartokinase	Brassica/Grass	Podzol	Topsoil	Rainfall-fed	2.7.2.4	Pseudomonadota	8.60457	Ascomycota	7.68434	0.398428	-0.920229
aspartokinase	Fallow	Luvisol	Subsoil	Drought	2.7.2.4	Pseudomonadota	11.0047	Ascomycota	11.0976	1.09736	0.0929075
aspartokinase	Fallow	Luvisol	Subsoil	Rainfall-fed	2.7.2.4	Pseudomonadota	7.39628	Ascomycota	11.2534	47.3268	3.85708
aspartokinase	Fallow	Luvisol	Topsoil	Drought	2.7.2.4	Pseudomonadota	9.97142	Ascomycota	10.8996	2.53002	0.928227
aspartokinase	Fallow	Luvisol	Topsoil	Rainfall-fed	2.7.2.4	Pseudomonadota	9.36584	Ascomycota	10.9136	4.70073	1.54772
aspartokinase	Fallow	Phaeozem	Subsoil	Drought	2.7.2.4	Pseudomonadota	11.4661	Ascomycota	7.22699	0.0144206	-4.2391
aspartokinase	Fallow	Phaeozem	Subsoil	Rainfall-fed	2.7.2.4	Pseudomonadota	10.1617	Ascomycota	6.96822	0.0410297	-3.19346
aspartokinase	Fallow	Phaeozem	Topsoil	Drought	2.7.2.4	Pseudomonadota	10.4996	Ascomycota	7.72899	0.0626222	-2.77063
aspartokinase	Fallow	Phaeozem	Topsoil	Rainfall-fed	2.7.2.4	Pseudomonadota	10.4157	Ascomycota	8.24232	0.113797	-2.17334
aspartokinase	Fallow	Podzol	Subsoil	Drought	2.7.2.4	Pseudomonadota	3.39008	Ascomycota	8.61949	186.683	5.22941
aspartokinase	Fallow	Podzol	Subsoil	Rainfall-fed	2.7.2.4	Pseudomonadota	5.9754	Ascomycota	6.68328	2.02968	0.707878
aspartokinase	Fallow	Podzol	Topsoil	Drought	2.7.2.4	Pseudomonadota	4.99869	Ascomycota	11.4491	632.943	6.45038
aspartokinase	Fallow	Podzol	Topsoil	Rainfall-fed	2.7.2.4	Pseudomonadota	4.99945	Ascomycota	11.6103	743.127	6.61087
aspartokinase	Legume/Grass	Luvisol	Subsoil	Drought	2.7.2.4	Pseudomonadota	10.8973	Ascomycota	8.54463	0.0951136	-2.35268
aspartokinase	Legume/Grass	Luvisol	Subsoil	Rainfall-fed	2.7.2.4	Pseudomonadota	12.9728	Ascomycota	11.9873	0.373278	-0.985431
aspartokinase	Legume/Grass	Luvisol	Topsoil	Drought	2.7.2.4	Pseudomonadota	10.5614	Ascomycota	11.1929	1.8805	0.63154
aspartokinase	Legume/Grass	Luvisol	Topsoil	Rainfall-fed	2.7.2.4	Pseudomonadota	10.8503	Ascomycota	11.1076	1.29347	0.257328
aspartokinase	Legume/Grass	Phaeozem	Subsoil	Drought	2.7.2.4	Pseudomonadota	11.6096	Ascomycota	6.5686	0.00646709	-5.04103
aspartokinase	Legume/Grass	Phaeozem	Subsoil	Rainfall-fed	2.7.2.4	Pseudomonadota	11.8205	Ascomycota	6.2411	0.00377495	-5.57937
aspartokinase	Legume/Grass	Phaeozem	Topsoil	Drought	2.7.2.4	Pseudomonadota	11.6729	Ascomycota	9.43923	0.107133	-2.23368
aspartokinase	Legume/Grass	Phaeozem	Topsoil	Rainfall-fed	2.7.2.4	Pseudomonadota	11.003	Ascomycota	8.86266	0.117613	-2.14036
aspartokinase	Legume/Grass	Podzol	Subsoil	Drought	2.7.2.4	Pseudomonadota	5.738	Ascomycota	5.95064	1.23693	0.212631
aspartokinase	Legume/Grass	Podzol	Subsoil	Rainfall-fed	2.7.2.4	Pseudomonadota	4.99886	Ascomycota	11.9485	1042.81	6.94968
aspartokinase	Legume/Grass	Podzol	Topsoil	Drought	2.7.2.4	Pseudomonadota	7.60382	Ascomycota	7.79431	1.20984	0.190489
aspartokinase	Legume/Grass	Podzol	Topsoil	Rainfall-fed	2.7.2.4	Pseudomonadota	10.0212	Ascomycota	7.70226	0.0983765	-2.31895
catalase-peroxidase	Brassica/Grass	Phaeozem	Subsoil	Drought	1.11.1.21	Actinomycetota	1.91677	Ascomycota	6.84429	138.037	4.92752
catalase-peroxidase	Brassica/Grass	Phaeozem	Subsoil	Drought	1.11.1.21	Pseudomonadota	4.77783	Ascomycota	6.84429	7.8968	2.06646
catalase-peroxidase	Brassica/Grass	Phaeozem	Subsoil	Rainfall-fed	1.11.1.21	Actinomycetota	2.98872	Ascomycota	9.0124	413.098	6.02368
catalase-peroxidase	Brassica/Grass	Phaeozem	Subsoil	Rainfall-fed	1.11.1.21	Pseudomonadota	5.73415	Ascomycota	9.0124	26.5293	3.27825
catalase-peroxidase	Brassica/Grass	Phaeozem	Topsoil	Drought	1.11.1.21	Actinomycetota	6.99709	Ascomycota	11.2369	69.3937	4.2398
catalase-peroxidase	Brassica/Grass	Phaeozem	Topsoil	Drought	1.11.1.21	Pseudomonadota	9.08909	Ascomycota	11.2369	8.56595	2.1478
catalase-peroxidase	Brassica/Grass	Phaeozem	Topsoil	Rainfall-fed	1.11.1.21	Actinomycetota	8.86697	Ascomycota	11.5311	14.3553	2.66412
catalase-peroxidase	Brassica/Grass	Phaeozem	Topsoil	Rainfall-fed	1.11.1.21	Pseudomonadota	8.5216	Ascomycota	11.5311	20.2769	3.00948
catalase-peroxidase	Brassica/Grass	Podzol	Subsoil	Drought	1.11.1.21	Actinomycetota	4.98017	Ascomycota	7.68873	15.0076	2.70856
catalase-peroxidase	Brassica/Grass	Podzol	Subsoil	Drought	1.11.1.21	Pseudomonadota	4.51031	Ascomycota	7.68873	24.0089	3.17842
catalase-peroxidase	Brassica/Grass	Podzol	Subsoil	Rainfall-fed	1.11.1.21	Actinomycetota	4.03788	Ascomycota	7.7834	42.3309	3.74552
catalase-peroxidase	Brassica/Grass	Podzol	Subsoil	Rainfall-fed	1.11.1.21	Pseudomonadota	2.7554	Ascomycota	7.7834	152.628	5.028
catalase-peroxidase	Brassica/Grass	Podzol	Topsoil	Drought	1.11.1.21	Actinomycetota	11.3212	Ascomycota	10.4859	0.433738	-0.835314
catalase-peroxidase	Brassica/Grass	Podzol	Topsoil	Drought	1.11.1.21	Pseudomonadota	10.1948	Ascomycota	10.4859	1.33782	0.291045
catalase-peroxidase	Brassica/Grass	Podzol	Topsoil	Rainfall-fed	1.11.1.21	Pseudomonadota	6.63208	Ascomycota	8.68619	7.79997	2.05412
catalase-peroxidase	Brassica/Grass	Podzol	Topsoil	Rainfall-fed	1.11.1.21	Actinomycetota	7.55112	Ascomycota	8.68619	3.11141	1.13508
catalase-peroxidase	Fallow	Luvisol	Subsoil	Drought	1.11.1.21	Pseudomonadota	8.43553	Ascomycota	4.96137	0.0309881	-3.47415
catalase-peroxidase	Fallow	Luvisol	Subsoil	Drought	1.11.1.21	Actinomycetota	9.34585	Ascomycota	4.96137	0.0124695	-4.38447
catalase-peroxidase	Fallow	Luvisol	Subsoil	Rainfall-fed	1.11.1.21	Pseudomonadota	6.08932	Ascomycota	9.17461	21.8736	3.08528
catalase-peroxidase	Fallow	Luvisol	Subsoil	Rainfall-fed	1.11.1.21	Actinomycetota	5.57391	Ascomycota	9.17461	36.6238	3.6007
catalase-peroxidase	Fallow	Luvisol	Topsoil	Drought	1.11.1.21	Actinomycetota	9.24765	Ascomycota	8.77537	0.62358	-0.472278
catalase-peroxidase	Fallow	Luvisol	Topsoil	Drought	1.11.1.21	Pseudomonadota	8.29186	Ascomycota	8.77537	1.62176	0.483512
catalase-peroxidase	Fallow	Luvisol	Topsoil	Rainfall-fed	1.11.1.21	Actinomycetota	6.81276	Ascomycota	7.45377	1.8984	0.641011
catalase-peroxidase	Fallow	Luvisol	Topsoil	Rainfall-fed	1.11.1.21	Pseudomonadota	6.70593	Ascomycota	7.45377	2.11243	0.747841
catalase-peroxidase	Fallow	Phaeozem	Subsoil	Drought	1.11.1.21	Pseudomonadota	4.29301	Ascomycota	6.94758	14.2189	2.65457
catalase-peroxidase	Fallow	Phaeozem	Subsoil	Drought	1.11.1.21	Actinomycetota	4.04242	Ascomycota	6.94758	18.2682	2.90516
catalase-peroxidase	Fallow	Phaeozem	Subsoil	Rainfall-fed	1.11.1.21	Pseudomonadota	4.67957	Ascomycota	5.41361	2.08348	0.734042
catalase-peroxidase	Fallow	Phaeozem	Subsoil	Rainfall-fed	1.11.1.21	Actinomycetota	2.77862	Ascomycota	5.41361	13.9433	2.635
catalase-peroxidase	Fallow	Phaeozem	Topsoil	Drought	1.11.1.21	Actinomycetota	8.07113	Ascomycota	11.2225	23.3682	3.15138
catalase-peroxidase	Fallow	Phaeozem	Topsoil	Drought	1.11.1.21	Pseudomonadota	9.20563	Ascomycota	11.2225	7.5148	2.01687
catalase-peroxidase	Fallow	Phaeozem	Topsoil	Rainfall-fed	1.11.1.21	Pseudomonadota	7.95107	Ascomycota	11.2108	26.0434	3.25977
catalase-peroxidase	Fallow	Phaeozem	Topsoil	Rainfall-fed	1.11.1.21	Actinomycetota	6.07791	Ascomycota	11.2108	169.513	5.13293
catalase-peroxidase	Fallow	Podzol	Subsoil	Drought	1.11.1.21	Actinomycetota	7.82289	Ascomycota	6.21494	0.200298	-1.60795
catalase-peroxidase	Fallow	Podzol	Subsoil	Drought	1.11.1.21	Pseudomonadota	6.51633	Ascomycota	6.21494	0.73979	-0.301388
catalase-peroxidase	Fallow	Podzol	Subsoil	Rainfall-fed	1.11.1.21	Actinomycetota	5.32988	Ascomycota	7.26725	6.94047	1.93737
catalase-peroxidase	Fallow	Podzol	Subsoil	Rainfall-fed	1.11.1.21	Pseudomonadota	6.48638	Ascomycota	7.26725	2.18337	0.780869
catalase-peroxidase	Fallow	Podzol	Topsoil	Drought	1.11.1.21	Actinomycetota	10.0145	Ascomycota	8.6533	0.256359	-1.36118
catalase-peroxidase	Fallow	Podzol	Topsoil	Drought	1.11.1.21	Pseudomonadota	8.88211	Ascomycota	8.6533	0.795476	-0.228814
catalase-peroxidase	Fallow	Podzol	Topsoil	Rainfall-fed	1.11.1.21	Actinomycetota	10.0648	Ascomycota	10.2523	1.20622	0.187491
catalase-peroxidase	Fallow	Podzol	Topsoil	Rainfall-fed	1.11.1.21	Pseudomonadota	9.05782	Ascomycota	10.2523	3.3019	1.1945
catalase-peroxidase	Legume/Grass	Luvisol	Subsoil	Drought	1.11.1.21	Pseudomonadota	5.53847	Ascomycota	4.5373	0.367449	-1.00117
catalase-peroxidase	Legume/Grass	Luvisol	Subsoil	Drought	1.11.1.21	Actinomycetota	4.93828	Ascomycota	4.5373	0.669664	-0.400979
catalase-peroxidase	Legume/Grass	Luvisol	Topsoil	Drought	1.11.1.21	Pseudomonadota	6.27594	Ascomycota	8.2652	7.31014	1.98926
catalase-peroxidase	Legume/Grass	Luvisol	Topsoil	Drought	1.11.1.21	Actinomycetota	7.47582	Ascomycota	8.2652	2.20203	0.789377
catalase-peroxidase	Legume/Grass	Luvisol	Topsoil	Rainfall-fed	1.11.1.21	Pseudomonadota	7.68059	Ascomycota	7.39188	0.749232	-0.288706
catalase-peroxidase	Legume/Grass	Luvisol	Topsoil	Rainfall-fed	1.11.1.21	Actinomycetota	9.25652	Ascomycota	7.39188	0.154953	-1.86463
catalase-peroxidase	Legume/Grass	Phaeozem	Subsoil	Drought	1.11.1.21	Pseudomonadota	6.31778	Ascomycota	8.85997	12.7075	2.54219
catalase-peroxidase	Legume/Grass	Phaeozem	Subsoil	Drought	1.11.1.21	Actinomycetota	3.74655	Ascomycota	8.85997	166.238	5.11342
catalase-peroxidase	Legume/Grass	Phaeozem	Subsoil	Rainfall-fed	1.11.1.21	Pseudomonadota	7.47888	Ascomycota	8.68863	3.35266	1.20976
catalase-peroxidase	Legume/Grass	Phaeozem	Subsoil	Rainfall-fed	1.11.1.21	Actinomycetota	3.46842	Ascomycota	8.68863	184.973	5.22021
catalase-peroxidase	Legume/Grass	Phaeozem	Topsoil	Drought	1.11.1.21	Actinomycetota	7.98113	Ascomycota	11.4628	32.5125	3.48162
catalase-peroxidase	Legume/Grass	Phaeozem	Topsoil	Drought	1.11.1.21	Pseudomonadota	10.8951	Ascomycota	11.4628	1.76412	0.567653
catalase-peroxidase	Legume/Grass	Phaeozem	Topsoil	Rainfall-fed	1.11.1.21	Pseudomonadota	10.7573	Ascomycota	11.2309	1.60583	0.473639
catalase-peroxidase	Legume/Grass	Phaeozem	Topsoil	Rainfall-fed	1.11.1.21	Actinomycetota	8.53232	Ascomycota	11.2309	14.8591	2.69861
catalase-peroxidase	Legume/Grass	Podzol	Subsoil	Drought	1.11.1.21	Actinomycetota	6.06625	Ascomycota	5.73308	0.716652	-0.333165
catalase-peroxidase	Legume/Grass	Podzol	Subsoil	Drought	1.11.1.21	Pseudomonadota	6.13809	Ascomycota	5.73308	0.666974	-0.405005
catalase-peroxidase	Legume/Grass	Podzol	Subsoil	Rainfall-fed	1.11.1.21	Pseudomonadota	4.0148	Ascomycota	5.47791	4.31934	1.4631
catalase-peroxidase	Legume/Grass	Podzol	Subsoil	Rainfall-fed	1.11.1.21	Actinomycetota	3.8373	Ascomycota	5.47791	5.15828	1.6406
catalase-peroxidase	Legume/Grass	Podzol	Topsoil	Drought	1.11.1.21	Pseudomonadota	9.95981	Ascomycota	9.28741	0.51048	-0.672403
catalase-peroxidase	Legume/Grass	Podzol	Topsoil	Drought	1.11.1.21	Actinomycetota	9.85076	Ascomycota	9.28741	0.569301	-0.563346
catalase-peroxidase	Legume/Grass	Podzol	Topsoil	Rainfall-fed	1.11.1.21	Pseudomonadota	10.9063	Ascomycota	10.8011	0.900188	-0.105152
catalase-peroxidase	Legume/Grass	Podzol	Topsoil	Rainfall-fed	1.11.1.21	Actinomycetota	10.6843	Ascomycota	10.8011	1.12398	0.116873
homoserine dehydrogenase	Brassica/Grass	Luvisol	Subsoil	Drought	1.1.1.3	Pseudomonadota	8.73719	Ascomycota	11.8871	23.3336	3.14989
homoserine dehydrogenase	Brassica/Grass	Luvisol	Subsoil	Drought	2.7.2.4	Pseudomonadota	8.73719	Ascomycota	11.8871	23.3336	3.14989
homoserine dehydrogenase	Brassica/Grass	Luvisol	Subsoil	Rainfall-fed	2.7.2.4	Pseudomonadota	3.69084	Ascomycota	10.7162	1124.85	7.02541
homoserine dehydrogenase	Brassica/Grass	Luvisol	Subsoil	Rainfall-fed	1.1.1.3	Pseudomonadota	3.69084	Ascomycota	10.7162	1124.85	7.02541
homoserine dehydrogenase	Brassica/Grass	Luvisol	Topsoil	Drought	2.7.2.4	Pseudomonadota	7.11329	Ascomycota	9.28895	8.80802	2.17566
homoserine dehydrogenase	Brassica/Grass	Luvisol	Topsoil	Drought	1.1.1.3	Pseudomonadota	7.11329	Ascomycota	9.28895	8.80802	2.17566
homoserine dehydrogenase	Brassica/Grass	Luvisol	Topsoil	Rainfall-fed	1.1.1.3	Pseudomonadota	3.469	Ascomycota	10.4713	1099.2	7.00234
homoserine dehydrogenase	Brassica/Grass	Luvisol	Topsoil	Rainfall-fed	2.7.2.4	Pseudomonadota	3.469	Ascomycota	10.4713	1099.2	7.00234
malate dehydrogenase	Brassica/Grass	Phaeozem	Topsoil	Rainfall-fed	1.1.1.37	Pseudomonadota	6.41164	Ascomycota	10.3049	49.0696	3.89324
malate dehydrogenase	Brassica/Grass	Phaeozem	Topsoil	Rainfall-fed	1.1.1.37	Actinomycetota	10.1836	Ascomycota	10.3049	1.12899	0.121325
malate dehydrogenase	Fallow	Phaeozem	Topsoil	Drought	1.1.1.37	Pseudomonadota	7.20129	Ascomycota	9.60638	11.0794	2.40509
malate dehydrogenase	Fallow	Phaeozem	Topsoil	Drought	1.1.1.37	Actinomycetota	7.37347	Ascomycota	9.60638	9.32701	2.23291
malate dehydrogenase	Legume/Grass	Phaeozem	Subsoil	Rainfall-fed	1.1.1.37	Pseudomonadota	2.40426	Ascomycota	10.7532	4225.79	8.34896
malate dehydrogenase	Legume/Grass	Phaeozem	Subsoil	Rainfall-fed	1.1.1.37	Actinomycetota	1.27036	Ascomycota	10.7532	13132.7	9.48286
malate dehydrogenase	Legume/Grass	Phaeozem	Topsoil	Drought	1.1.1.37	Pseudomonadota	5.34482	Ascomycota	10.4479	164.525	5.10306
malate dehydrogenase	Legume/Grass	Phaeozem	Topsoil	Drought	1.1.1.37	Actinomycetota	5.82399	Ascomycota	10.4479	101.89	4.62389
malate dehydrogenase	Legume/Grass	Phaeozem	Topsoil	Rainfall-fed	1.1.1.37	Pseudomonadota	6.61876	Ascomycota	10.2825	39.006	3.66372
malate dehydrogenase	Legume/Grass	Phaeozem	Topsoil	Rainfall-fed	1.1.1.37	Actinomycetota	7.07206	Ascomycota	10.2825	24.7895	3.21042
pyruvate dehydrogenase complex	Brassica/Grass	Podzol	Subsoil	Drought	1.2.4.1	Actinomycetota	6.61706	Ascomycota	7.52213	2.47211	0.905073
pyruvate dehydrogenase complex	Brassica/Grass	Podzol	Subsoil	Drought	1.2.4.1	Pseudomonadota	5.8098	Ascomycota	7.52213	5.54188	1.71233
pyruvate dehydrogenase complex	Brassica/Grass	Podzol	Subsoil	Rainfall-fed	1.2.4.1	Pseudomonadota	6.88458	Ascomycota	7.80653	2.5142	0.921953
pyruvate dehydrogenase complex	Brassica/Grass	Podzol	Subsoil	Rainfall-fed	1.2.4.1	Actinomycetota	3.18136	Ascomycota	7.80653	102.02	4.62517
pyruvate dehydrogenase complex	Brassica/Grass	Podzol	Topsoil	Drought	1.2.4.1	Actinomycetota	9.28187	Ascomycota	11.2624	7.24659	1.98053
pyruvate dehydrogenase complex	Brassica/Grass	Podzol	Topsoil	Drought	1.2.4.1	Pseudomonadota	10.8337	Ascomycota	11.2624	1.53533	0.428744
pyruvate dehydrogenase complex	Brassica/Grass	Podzol	Topsoil	Rainfall-fed	1.2.4.1	Actinomycetota	7.86599	Ascomycota	8.53925	1.96062	0.673262
pyruvate dehydrogenase complex	Brassica/Grass	Podzol	Topsoil	Rainfall-fed	1.2.4.1	Pseudomonadota	4.77718	Ascomycota	8.53925	43.0373	3.76207
pyruvate dehydrogenase complex	Fallow	Podzol	Subsoil	Drought	1.2.4.1	Actinomycetota	5.95988	Ascomycota	6.84844	2.43164	0.888567
pyruvate dehydrogenase complex	Fallow	Podzol	Subsoil	Drought	1.2.4.1	Pseudomonadota	5.54875	Ascomycota	6.84844	3.66819	1.2997
pyruvate dehydrogenase complex	Fallow	Podzol	Subsoil	Rainfall-fed	1.2.4.1	Actinomycetota	3.5385	Ascomycota	8.25413	111.678	4.71562
pyruvate dehydrogenase complex	Fallow	Podzol	Subsoil	Rainfall-fed	1.2.4.1	Pseudomonadota	4.22609	Ascomycota	8.25413	56.1503	4.02803
pyruvate dehydrogenase complex	Fallow	Podzol	Topsoil	Drought	1.2.4.1	Actinomycetota	8.36897	Ascomycota	10.9976	13.8548	2.62863
pyruvate dehydrogenase complex	Fallow	Podzol	Topsoil	Drought	1.2.4.1	Pseudomonadota	8.62	Ascomycota	10.9976	10.779	2.3776
pyruvate dehydrogenase complex	Fallow	Podzol	Topsoil	Rainfall-fed	1.2.4.1	Pseudomonadota	9.09618	Ascomycota	10.9815	6.58848	1.88532
pyruvate dehydrogenase complex	Fallow	Podzol	Topsoil	Rainfall-fed	1.2.4.1	Actinomycetota	9.59346	Ascomycota	10.9815	4.00701	1.38805
pyruvate dehydrogenase complex	Legume/Grass	Podzol	Subsoil	Drought	1.2.4.1	Actinomycetota	8.53171	Ascomycota	8.56325	1.03204	0.0315385
pyruvate dehydrogenase complex	Legume/Grass	Podzol	Subsoil	Drought	1.2.4.1	Pseudomonadota	3.68273	Ascomycota	8.56325	131.699	4.88052
pyruvate dehydrogenase complex	Legume/Grass	Podzol	Subsoil	Rainfall-fed	1.2.4.1	Actinomycetota	5.02413	Ascomycota	6.21413	3.28708	1.19
pyruvate dehydrogenase complex	Legume/Grass	Podzol	Subsoil	Rainfall-fed	1.2.4.1	Pseudomonadota	1.66596	Ascomycota	6.21413	94.4592	4.54817
pyruvate dehydrogenase complex	Legume/Grass	Podzol	Topsoil	Drought	1.2.4.1	Actinomycetota	10.5984	Ascomycota	11.0614	1.58889	0.463036
pyruvate dehydrogenase complex	Legume/Grass	Podzol	Topsoil	Drought	1.2.4.1	Pseudomonadota	6.60724	Ascomycota	11.0614	85.9843	4.45416
pyruvate dehydrogenase complex	Legume/Grass	Podzol	Topsoil	Rainfall-fed	1.2.4.1	Actinomycetota	9.02747	Ascomycota	9.35106	1.38207	0.323585
pyruvate dehydrogenase complex	Legume/Grass	Podzol	Topsoil	Rainfall-fed	1.2.4.1	Pseudomonadota	8.62462	Ascomycota	9.35106	2.0677	0.726436
S-adenosylmethionine synthase	Brassica/Grass	Phaeozem	Subsoil	Drought	2.5.1.6	Pseudomonadota	4.74433	Ascomycota	5.2595	1.67393	0.515176
S-adenosylmethionine synthase	Brassica/Grass	Phaeozem	Subsoil	Drought	2.5.1.6	Actinomycetota	3.02766	Ascomycota	5.2595	9.31697	2.23184
S-adenosylmethionine synthase	Brassica/Grass	Phaeozem	Subsoil	Rainfall-fed	2.5.1.6	Actinomycetota	5.22542	Ascomycota	8.00499	16.112	2.77957
S-adenosylmethionine synthase	Brassica/Grass	Phaeozem	Subsoil	Rainfall-fed	2.5.1.6	Pseudomonadota	3.51974	Ascomycota	8.00499	88.699	4.48525
S-adenosylmethionine synthase	Brassica/Grass	Phaeozem	Topsoil	Drought	2.5.1.6	Actinomycetota	9.71544	Ascomycota	6.83392	0.0560498	-2.88152
S-adenosylmethionine synthase	Brassica/Grass	Phaeozem	Topsoil	Drought	2.5.1.6	Pseudomonadota	8.19189	Ascomycota	6.83392	0.257183	-1.35797
S-adenosylmethionine synthase	Brassica/Grass	Phaeozem	Topsoil	Rainfall-fed	2.5.1.6	Pseudomonadota	10.7879	Ascomycota	7.62742	0.0424056	-3.16048
S-adenosylmethionine synthase	Brassica/Grass	Phaeozem	Topsoil	Rainfall-fed	2.5.1.6	Actinomycetota	7.35446	Ascomycota	7.62742	1.31385	0.27296
S-adenosylmethionine synthase	Brassica/Grass	Podzol	Subsoil	Drought	2.5.1.6	Actinomycetota	4.86221	Ascomycota	10.8122	383.735	5.94995
S-adenosylmethionine synthase	Brassica/Grass	Podzol	Subsoil	Drought	2.5.1.6	Pseudomonadota	5.82395	Ascomycota	10.8122	146.674	4.98821
S-adenosylmethionine synthase	Brassica/Grass	Podzol	Subsoil	Rainfall-fed	2.5.1.6	Pseudomonadota	4.66449	Ascomycota	10.4585	328.341	5.79405
S-adenosylmethionine synthase	Brassica/Grass	Podzol	Subsoil	Rainfall-fed	2.5.1.6	Actinomycetota	4.7957	Ascomycota	10.4585	287.967	5.66285
S-adenosylmethionine synthase	Brassica/Grass	Podzol	Topsoil	Drought	2.5.1.6	Pseudomonadota	10.0011	Ascomycota	13.1492	23.2896	3.14801
S-adenosylmethionine synthase	Brassica/Grass	Podzol	Topsoil	Drought	2.5.1.6	Actinomycetota	5.77979	Ascomycota	13.1492	1586.62	7.36936
S-adenosylmethionine synthase	Brassica/Grass	Podzol	Topsoil	Rainfall-fed	2.5.1.6	Pseudomonadota	6.02204	Ascomycota	11.0159	147.502	4.99384
S-adenosylmethionine synthase	Brassica/Grass	Podzol	Topsoil	Rainfall-fed	2.5.1.6	Actinomycetota	2.38383	Ascomycota	11.0159	5608.58	8.63205
S-adenosylmethionine synthase	Fallow	Phaeozem	Subsoil	Drought	2.5.1.6	Pseudomonadota	5.09326	Ascomycota	6.43222	3.81505	1.33895
S-adenosylmethionine synthase	Fallow	Phaeozem	Subsoil	Drought	2.5.1.6	Actinomycetota	4.50557	Ascomycota	6.43222	6.86647	1.92665
S-adenosylmethionine synthase	Fallow	Phaeozem	Subsoil	Rainfall-fed	2.5.1.6	Pseudomonadota	6.41427	Ascomycota	4.68881	0.178091	-1.72546
S-adenosylmethionine synthase	Fallow	Phaeozem	Subsoil	Rainfall-fed	2.5.1.6	Actinomycetota	2.83255	Ascomycota	4.68881	6.39981	1.85627
S-adenosylmethionine synthase	Fallow	Phaeozem	Topsoil	Drought	2.5.1.6	Actinomycetota	6.13554	Ascomycota	5.33442	0.448827	-0.801118
S-adenosylmethionine synthase	Fallow	Phaeozem	Topsoil	Drought	2.5.1.6	Pseudomonadota	5.60934	Ascomycota	5.33442	0.759639	-0.274912
S-adenosylmethionine synthase	Fallow	Phaeozem	Topsoil	Rainfall-fed	2.5.1.6	Actinomycetota	5.73999	Ascomycota	6.91876	3.25035	1.17876
S-adenosylmethionine synthase	Fallow	Phaeozem	Topsoil	Rainfall-fed	2.5.1.6	Pseudomonadota	4.79605	Ascomycota	6.91876	8.35374	2.12271
S-adenosylmethionine synthase	Fallow	Podzol	Subsoil	Drought	2.5.1.6	Actinomycetota	6.7842	Ascomycota	10.5686	44.0105	3.78443
S-adenosylmethionine synthase	Fallow	Podzol	Subsoil	Drought	2.5.1.6	Pseudomonadota	4.48609	Ascomycota	10.5686	438.141	6.08254
S-adenosylmethionine synthase	Fallow	Podzol	Subsoil	Rainfall-fed	2.5.1.6	Actinomycetota	3.62364	Ascomycota	12.2123	5370.39	8.58865
S-adenosylmethionine synthase	Fallow	Podzol	Subsoil	Rainfall-fed	2.5.1.6	Pseudomonadota	3.60816	Ascomycota	12.2123	5454.17	8.60414
S-adenosylmethionine synthase	Fallow	Podzol	Topsoil	Drought	2.5.1.6	Actinomycetota	6.13087	Ascomycota	11.0943	143.09	4.96347
S-adenosylmethionine synthase	Fallow	Podzol	Topsoil	Drought	2.5.1.6	Pseudomonadota	4.32156	Ascomycota	11.0943	873.736	6.77278
S-adenosylmethionine synthase	Fallow	Podzol	Topsoil	Rainfall-fed	2.5.1.6	Actinomycetota	4.49358	Ascomycota	12.8816	4394.11	8.38802
S-adenosylmethionine synthase	Fallow	Podzol	Topsoil	Rainfall-fed	2.5.1.6	Pseudomonadota	6.21395	Ascomycota	12.8816	786.547	6.66765
S-adenosylmethionine synthase	Legume/Grass	Luvisol	Subsoil	Drought	2.5.1.6	Pseudomonadota	0.596997	Ascomycota	9.85544	10492.8	9.25844
S-adenosylmethionine synthase	Legume/Grass	Luvisol	Subsoil	Rainfall-fed	2.5.1.6	Pseudomonadota	0.516549	Ascomycota	5.29075	118.416	4.77421
S-adenosylmethionine synthase	Legume/Grass	Luvisol	Topsoil	Drought	2.5.1.6	Pseudomonadota	6.12645	Ascomycota	10.3695	69.622	4.24308
S-adenosylmethionine synthase	Legume/Grass	Luvisol	Topsoil	Rainfall-fed	2.5.1.6	Pseudomonadota	3.81855	Ascomycota	6.56042	15.516	2.74187
S-adenosylmethionine synthase	Legume/Grass	Phaeozem	Subsoil	Drought	2.5.1.6	Actinomycetota	3.99603	Ascomycota	5.64341	5.19336	1.64738
S-adenosylmethionine synthase	Legume/Grass	Phaeozem	Subsoil	Drought	2.5.1.6	Pseudomonadota	6.27661	Ascomycota	5.64341	0.530888	-0.633205
S-adenosylmethionine synthase	Legume/Grass	Phaeozem	Subsoil	Rainfall-fed	2.5.1.6	Pseudomonadota	6.53697	Ascomycota	5.30272	0.291053	-1.23425
S-adenosylmethionine synthase	Legume/Grass	Phaeozem	Subsoil	Rainfall-fed	2.5.1.6	Actinomycetota	5.91944	Ascomycota	5.30272	0.539712	-0.61672
S-adenosylmethionine synthase	Legume/Grass	Phaeozem	Topsoil	Drought	2.5.1.6	Pseudomonadota	9.7345	Ascomycota	5.40102	0.0131218	-4.33348
S-adenosylmethionine synthase	Legume/Grass	Phaeozem	Topsoil	Drought	2.5.1.6	Actinomycetota	10.4037	Ascomycota	5.40102	0.00671962	-5.00272
S-adenosylmethionine synthase	Legume/Grass	Phaeozem	Topsoil	Rainfall-fed	2.5.1.6	Actinomycetota	8.99121	Ascomycota	5.21445	0.0228966	-3.77676
S-adenosylmethionine synthase	Legume/Grass	Phaeozem	Topsoil	Rainfall-fed	2.5.1.6	Pseudomonadota	9.44462	Ascomycota	5.21445	0.0145499	-4.23017
S-adenosylmethionine synthase	Legume/Grass	Podzol	Subsoil	Drought	2.5.1.6	Actinomycetota	4.5045	Ascomycota	10.2513	313.198	5.74683
S-adenosylmethionine synthase	Legume/Grass	Podzol	Subsoil	Drought	2.5.1.6	Pseudomonadota	4.9809	Ascomycota	10.2513	194.5	5.27043
S-adenosylmethionine synthase	Legume/Grass	Podzol	Subsoil	Rainfall-fed	2.5.1.6	Pseudomonadota	4.8028	Ascomycota	8.49632	40.1861	3.69352
S-adenosylmethionine synthase	Legume/Grass	Podzol	Subsoil	Rainfall-fed	2.5.1.6	Actinomycetota	4.0068	Ascomycota	8.49632	89.0788	4.48952
S-adenosylmethionine synthase	Legume/Grass	Podzol	Topsoil	Drought	2.5.1.6	Actinomycetota	9.28649	Ascomycota	11.261	7.20311	1.97451
S-adenosylmethionine synthase	Legume/Grass	Podzol	Topsoil	Drought	2.5.1.6	Pseudomonadota	7.36748	Ascomycota	11.261	49.0837	3.89353
S-adenosylmethionine synthase	Legume/Grass	Podzol	Topsoil	Rainfall-fed	2.5.1.6	Pseudomonadota	9.44865	Ascomycota	12.7799	27.9723	3.33121
S-adenosylmethionine synthase	Legume/Grass	Podzol	Topsoil	Rainfall-fed	2.5.1.6	Actinomycetota	7.59601	Ascomycota	12.7799	178.37	5.18386
superoxide dismutase	Brassica/Grass	Phaeozem	Subsoil	Drought	1.15.1.1	Actinomycetota	4.38487	Ascomycota	4.96088	1.77893	0.57601
superoxide dismutase	Brassica/Grass	Phaeozem	Subsoil	Drought	1.15.1.1	Pseudomonadota	6.49255	Ascomycota	4.96088	0.216174	-1.53167
superoxide dismutase	Brassica/Grass	Phaeozem	Subsoil	Rainfall-fed	1.15.1.1	Actinomycetota	5.54091	Ascomycota	4.29276	0.287035	-1.24815
superoxide dismutase	Brassica/Grass	Phaeozem	Subsoil	Rainfall-fed	1.15.1.1	Pseudomonadota	4.1848	Ascomycota	4.29276	1.11401	0.107963
superoxide dismutase	Brassica/Grass	Phaeozem	Topsoil	Drought	1.15.1.1	Pseudomonadota	8.07046	Ascomycota	5.29589	0.0623763	-2.77457
superoxide dismutase	Brassica/Grass	Phaeozem	Topsoil	Drought	1.15.1.1	Actinomycetota	9.04817	Ascomycota	5.29589	0.0234642	-3.75228
superoxide dismutase	Brassica/Grass	Phaeozem	Topsoil	Rainfall-fed	1.15.1.1	Actinomycetota	6.8265	Ascomycota	4.1047	0.0657558	-2.72181
superoxide dismutase	Brassica/Grass	Phaeozem	Topsoil	Rainfall-fed	1.15.1.1	Pseudomonadota	7.23747	Ascomycota	4.1047	0.0435964	-3.13278
superoxide dismutase	Fallow	Phaeozem	Subsoil	Drought	1.15.1.1	Actinomycetota	6.55337	Ascomycota	5.09117	0.231726	-1.4622
superoxide dismutase	Fallow	Phaeozem	Subsoil	Drought	1.15.1.1	Pseudomonadota	4.83544	Ascomycota	5.09117	1.29141	0.255734
superoxide dismutase	Fallow	Phaeozem	Subsoil	Rainfall-fed	1.15.1.1	Pseudomonadota	4.87565	Ascomycota	4.05436	0.439867	-0.821282
superoxide dismutase	Fallow	Phaeozem	Subsoil	Rainfall-fed	1.15.1.1	Actinomycetota	7.11312	Ascomycota	4.05436	0.0469462	-3.05875
superoxide dismutase	Fallow	Phaeozem	Topsoil	Drought	1.15.1.1	Pseudomonadota	10.4358	Ascomycota	9.37331	0.345602	-1.06247
superoxide dismutase	Fallow	Phaeozem	Topsoil	Drought	1.15.1.1	Actinomycetota	9.22913	Ascomycota	9.37331	1.1551	0.144184
superoxide dismutase	Fallow	Phaeozem	Topsoil	Rainfall-fed	1.15.1.1	Actinomycetota	9.62008	Ascomycota	3.15938	0.00156369	-6.46071
superoxide dismutase	Fallow	Phaeozem	Topsoil	Rainfall-fed	1.15.1.1	Pseudomonadota	10.1884	Ascomycota	3.15938	0.000885804	-7.02902
superoxide dismutase	Legume/Grass	Phaeozem	Subsoil	Drought	1.15.1.1	Actinomycetota	0	Ascomycota	5.83822	343.167	5.83822
superoxide dismutase	Legume/Grass	Phaeozem	Subsoil	Drought	1.15.1.1	Pseudomonadota	1.20533	Ascomycota	5.83822	102.811	4.63289
superoxide dismutase	Legume/Grass	Phaeozem	Subsoil	Rainfall-fed	1.15.1.1	Pseudomonadota	3.6806	Ascomycota	3.70263	1.02228	0.0220325
superoxide dismutase	Legume/Grass	Phaeozem	Subsoil	Rainfall-fed	1.15.1.1	Actinomycetota	0	Ascomycota	3.70263	40.554	3.70263
superoxide dismutase	Legume/Grass	Phaeozem	Topsoil	Drought	1.15.1.1	Actinomycetota	3.37394	Ascomycota	7.55584	65.4904	4.1819
superoxide dismutase	Legume/Grass	Phaeozem	Topsoil	Drought	1.15.1.1	Pseudomonadota	7.32235	Ascomycota	7.55584	1.263	0.233487
superoxide dismutase	Legume/Grass	Phaeozem	Topsoil	Rainfall-fed	1.15.1.1	Pseudomonadota	8.7526	Ascomycota	3.87892	0.00764521	-4.87368
superoxide dismutase	Legume/Grass	Phaeozem	Topsoil	Rainfall-fed	1.15.1.1	Actinomycetota	6.65142	Ascomycota	3.87892	0.0625058	-2.7725
Supplementary Table S12c
Summary of pairwise significance tests using multivariate analysis of variance (MANOVA) of the fungal to bacterial proteome abundance ratios at different sites with distinct soil properties and soil moisture conditions - drought (D) and rainfall-fed (RF)
Protein_Description	Variation	Soil_type	Condition	Depth_A	Depth_B	p.value_adjusted	p.value_adjusted_significance
aspartokinase	Brassica/Grass	Luvisol	Drought	Topsoil	Subsoil	1	ns
homoserine dehydrogenase	Brassica/Grass	Luvisol	Drought	Topsoil	Subsoil	1	ns
aspartokinase	Fallow	Luvisol	Drought	Topsoil	Subsoil	1	ns
catalase_peroxidase	Fallow	Luvisol	Drought	Topsoil	Subsoil	1	ns
aspartokinase	Legume/Grass	Luvisol	Drought	Topsoil	Subsoil	1	ns
catalase_peroxidase	Legume/Grass	Luvisol	Drought	Topsoil	Subsoil	1	ns
aspartokinase	Brassica/Grass	Phaeozem	Drought	Topsoil	Subsoil	1	ns
catalase_peroxidase	Brassica/Grass	Phaeozem	Drought	Topsoil	Subsoil	1	ns
S_adenosylmethionine synthase	Brassica/Grass	Phaeozem	Drought	Topsoil	Subsoil	1	ns
superoxide dismutase	Brassica/Grass	Phaeozem	Drought	Topsoil	Subsoil	1	ns
aspartokinase	Fallow	Phaeozem	Drought	Topsoil	Subsoil	1	ns
catalase_peroxidase	Fallow	Phaeozem	Drought	Topsoil	Subsoil	1	ns
S_adenosylmethionine synthase	Fallow	Phaeozem	Drought	Topsoil	Subsoil	1	ns
superoxide dismutase	Fallow	Phaeozem	Drought	Topsoil	Subsoil	1	ns
aspartokinase	Legume/Grass	Phaeozem	Drought	Topsoil	Subsoil	1	ns
catalase_peroxidase	Legume/Grass	Phaeozem	Drought	Topsoil	Subsoil	1	ns
S_adenosylmethionine synthase	Legume/Grass	Phaeozem	Drought	Topsoil	Subsoil	1	ns
superoxide dismutase	Legume/Grass	Phaeozem	Drought	Topsoil	Subsoil	1	ns
6_phosphogluconolactonase	Brassica/Grass	Podzol	Drought	Topsoil	Subsoil	1	ns
aspartokinase	Brassica/Grass	Podzol	Drought	Topsoil	Subsoil	1	ns
catalase_peroxidase	Brassica/Grass	Podzol	Drought	Topsoil	Subsoil	1	ns
pyruvate dehydrogenase complex	Brassica/Grass	Podzol	Drought	Topsoil	Subsoil	1	ns
S_adenosylmethionine synthase	Brassica/Grass	Podzol	Drought	Topsoil	Subsoil	1	ns
6_phosphogluconolactonase	Fallow	Podzol	Drought	Topsoil	Subsoil	1	ns
aspartokinase	Fallow	Podzol	Drought	Topsoil	Subsoil	1	ns
catalase_peroxidase	Fallow	Podzol	Drought	Topsoil	Subsoil	1	ns
pyruvate dehydrogenase complex	Fallow	Podzol	Drought	Topsoil	Subsoil	1	ns
S_adenosylmethionine synthase	Fallow	Podzol	Drought	Topsoil	Subsoil	1	ns
aspartokinase	Legume/Grass	Podzol	Drought	Topsoil	Subsoil	1	ns
catalase_peroxidase	Legume/Grass	Podzol	Drought	Topsoil	Subsoil	1	ns
pyruvate dehydrogenase complex	Legume/Grass	Podzol	Drought	Topsoil	Subsoil	1	ns
S_adenosylmethionine synthase	Legume/Grass	Podzol	Drought	Topsoil	Subsoil	1	ns
aspartokinase	Brassica/Grass	Luvisol	Rainfall_fed	Topsoil	Subsoil	1	ns
homoserine dehydrogenase	Brassica/Grass	Luvisol	Rainfall_fed	Topsoil	Subsoil	1	ns
aspartokinase	Fallow	Luvisol	Rainfall_fed	Topsoil	Subsoil	1	ns
catalase_peroxidase	Fallow	Luvisol	Rainfall_fed	Topsoil	Subsoil	1	ns
aspartokinase	Legume/Grass	Luvisol	Rainfall_fed	Topsoil	Subsoil	1	ns
S_adenosylmethionine synthase	Legume/Grass	Luvisol	Rainfall_fed	Topsoil	Subsoil	1	ns
aspartokinase	Brassica/Grass	Phaeozem	Rainfall_fed	Topsoil	Subsoil	1	ns
catalase_peroxidase	Brassica/Grass	Phaeozem	Rainfall_fed	Topsoil	Subsoil	1	ns
S_adenosylmethionine synthase	Brassica/Grass	Phaeozem	Rainfall_fed	Topsoil	Subsoil	1	ns
superoxide dismutase	Brassica/Grass	Phaeozem	Rainfall_fed	Topsoil	Subsoil	1	ns
aspartokinase	Fallow	Phaeozem	Rainfall_fed	Topsoil	Subsoil	1	ns
catalase_peroxidase	Fallow	Phaeozem	Rainfall_fed	Topsoil	Subsoil	1	ns
S_adenosylmethionine synthase	Fallow	Phaeozem	Rainfall_fed	Topsoil	Subsoil	1	ns
superoxide dismutase	Fallow	Phaeozem	Rainfall_fed	Topsoil	Subsoil	1	ns
aspartokinase	Legume/Grass	Phaeozem	Rainfall_fed	Topsoil	Subsoil	1	ns
catalase_peroxidase	Legume/Grass	Phaeozem	Rainfall_fed	Topsoil	Subsoil	1	ns
S_adenosylmethionine synthase	Legume/Grass	Phaeozem	Rainfall_fed	Topsoil	Subsoil	1	ns
superoxide dismutase	Legume/Grass	Phaeozem	Rainfall_fed	Topsoil	Subsoil	1	ns
6_phosphogluconolactonase	Brassica/Grass	Podzol	Rainfall_fed	Topsoil	Subsoil	1	ns
aspartokinase	Brassica/Grass	Podzol	Rainfall_fed	Topsoil	Subsoil	1	ns
catalase_peroxidase	Brassica/Grass	Podzol	Rainfall_fed	Topsoil	Subsoil	1	ns
pyruvate dehydrogenase complex	Brassica/Grass	Podzol	Rainfall_fed	Topsoil	Subsoil	1	ns
S_adenosylmethionine synthase	Brassica/Grass	Podzol	Rainfall_fed	Topsoil	Subsoil	0.994698	ns
6_phosphogluconolactonase	Fallow	Podzol	Rainfall_fed	Topsoil	Subsoil	1	ns
aspartokinase	Fallow	Podzol	Rainfall_fed	Topsoil	Subsoil	1	ns
catalase_peroxidase	Fallow	Podzol	Rainfall_fed	Topsoil	Subsoil	1	ns
pyruvate dehydrogenase complex	Fallow	Podzol	Rainfall_fed	Topsoil	Subsoil	1	ns
S_adenosylmethionine synthase	Fallow	Podzol	Rainfall_fed	Topsoil	Subsoil	0.953536	ns
6_phosphogluconolactonase	Legume/Grass	Podzol	Rainfall_fed	Topsoil	Subsoil	1	ns
aspartokinase	Legume/Grass	Podzol	Rainfall_fed	Topsoil	Subsoil	1	ns
catalase_peroxidase	Legume/Grass	Podzol	Rainfall_fed	Topsoil	Subsoil	1	ns
pyruvate dehydrogenase complex	Legume/Grass	Podzol	Rainfall_fed	Topsoil	Subsoil	1	ns
S_adenosylmethionine synthase	Legume/Grass	Podzol	Rainfall_fed	Topsoil	Subsoil	1	ns
S_adenosylmethionine synthase	Legume/Grass	Luvisol	Drought	Topsoil	Subsoil	2.8381e-09	****
malate dehydrogenase	Legume/Grass	Phaeozem	Rainfall_fed	Topsoil	Subsoil	2.27034e-10	****
