# Supplementary material
Source: Research Square preprint supplement (doi:10.21203/rs.3.rs-9052155/v1)
Supplement: Supplementary file 2 [file 07656d5a95992856b7aa32ea.xlsx]

## Sheet: S6a-b
Supplementary Table S6a
Summary of the fold-change of absolute ITS2 gene abundances of each individual fungal phylum classified for different trophic modes from the FUNGUILD database at different soil moisture conditions - drought (D) and rainfall-fed (RF) at the different soil types and soil sampling depths using cover crop variations
Variation	Soil_type	Depth	Phylum	trophic_mode_funguild	fold_change_ITS2_gene_absolue_abundances
Brassica/Grass	Luvisol	Subsoil	Ascomycota	Pathotroph	-1.58578
Brassica/Grass	Luvisol	Subsoil	Ascomycota	Saprotroph	2.03081
Brassica/Grass	Luvisol	Subsoil	Ascomycota	Symbiotroph	-1.81914
Brassica/Grass	Luvisol	Subsoil	Basidiomycota	Pathotroph	-1.3787
Brassica/Grass	Luvisol	Subsoil	Basidiomycota	Saprotroph	-1.49769
Brassica/Grass	Luvisol	Subsoil	Basidiomycota	Symbiotroph	-3.29498
Brassica/Grass	Luvisol	Subsoil	Chytridiomycota	Saprotroph	-5.89533
Brassica/Grass	Luvisol	Subsoil	Mucoromycota	Pathotroph	0.125843
Brassica/Grass	Luvisol	Subsoil	Mucoromycota	Saprotroph	-0.924646
Brassica/Grass	Luvisol	Subsoil	Mucoromycota	Symbiotroph	0.56966
Brassica/Grass	Luvisol	Topsoil	Ascomycota	Pathotroph	-0.727389
Brassica/Grass	Luvisol	Topsoil	Ascomycota	Saprotroph	-2.13418
Brassica/Grass	Luvisol	Topsoil	Ascomycota	Symbiotroph	-0.3902
Brassica/Grass	Luvisol	Topsoil	Basidiomycota	Pathotroph	1.90862
Brassica/Grass	Luvisol	Topsoil	Basidiomycota	Saprotroph	-0.30056
Brassica/Grass	Luvisol	Topsoil	Basidiomycota	Symbiotroph	-3.55707
Brassica/Grass	Luvisol	Topsoil	Chytridiomycota	Saprotroph	0.758146
Brassica/Grass	Luvisol	Topsoil	Mucoromycota	Pathotroph	-0.92715
Brassica/Grass	Luvisol	Topsoil	Mucoromycota	Saprotroph	-0.190773
Brassica/Grass	Luvisol	Topsoil	Mucoromycota	Symbiotroph	-0.669727
Brassica/Grass	Phaeozem	Subsoil	Ascomycota	Pathotroph	0.789829
Brassica/Grass	Phaeozem	Subsoil	Ascomycota	Saprotroph	2.13005
Brassica/Grass	Phaeozem	Subsoil	Ascomycota	Symbiotroph	0.166136
Brassica/Grass	Phaeozem	Subsoil	Basidiomycota	Pathotroph	1.48796
Brassica/Grass	Phaeozem	Subsoil	Basidiomycota	Saprotroph	-0.0153667
Brassica/Grass	Phaeozem	Subsoil	Basidiomycota	Symbiotroph	0
Brassica/Grass	Phaeozem	Subsoil	Chytridiomycota	Saprotroph	0
Brassica/Grass	Phaeozem	Subsoil	Mucoromycota	Pathotroph	1.25546
Brassica/Grass	Phaeozem	Subsoil	Mucoromycota	Saprotroph	1.69013
Brassica/Grass	Phaeozem	Subsoil	Mucoromycota	Symbiotroph	3.48991
Brassica/Grass	Phaeozem	Topsoil	Ascomycota	Pathotroph	0.895634
Brassica/Grass	Phaeozem	Topsoil	Ascomycota	Saprotroph	-0.457022
Brassica/Grass	Phaeozem	Topsoil	Ascomycota	Symbiotroph	1.00023
Brassica/Grass	Phaeozem	Topsoil	Basidiomycota	Pathotroph	0.638228
Brassica/Grass	Phaeozem	Topsoil	Basidiomycota	Saprotroph	0.339856
Brassica/Grass	Phaeozem	Topsoil	Basidiomycota	Symbiotroph	2.05196
Brassica/Grass	Phaeozem	Topsoil	Chytridiomycota	Saprotroph	-0.0808445
Brassica/Grass	Phaeozem	Topsoil	Mucoromycota	Pathotroph	-0.734331
Brassica/Grass	Phaeozem	Topsoil	Mucoromycota	Saprotroph	0.983263
Brassica/Grass	Phaeozem	Topsoil	Mucoromycota	Symbiotroph	0.277002
Brassica/Grass	Podzol	Subsoil	Ascomycota	Pathotroph	3.5055
Brassica/Grass	Podzol	Subsoil	Ascomycota	Saprotroph	0.304285
Brassica/Grass	Podzol	Subsoil	Ascomycota	Symbiotroph	1.79756
Brassica/Grass	Podzol	Subsoil	Basidiomycota	Pathotroph	-0.382004
Brassica/Grass	Podzol	Subsoil	Basidiomycota	Saprotroph	1.47184
Brassica/Grass	Podzol	Subsoil	Mucoromycota	Pathotroph	2.61958
Brassica/Grass	Podzol	Subsoil	Mucoromycota	Saprotroph	1.3467
Brassica/Grass	Podzol	Topsoil	Ascomycota	Pathotroph	1.57299
Brassica/Grass	Podzol	Topsoil	Ascomycota	Saprotroph	0.984394
Brassica/Grass	Podzol	Topsoil	Ascomycota	Symbiotroph	0.840122
Brassica/Grass	Podzol	Topsoil	Basidiomycota	Pathotroph	0.115573
Brassica/Grass	Podzol	Topsoil	Basidiomycota	Saprotroph	-0.621154
Brassica/Grass	Podzol	Topsoil	Basidiomycota	Symbiotroph	3.97278
Brassica/Grass	Podzol	Topsoil	Chytridiomycota	Saprotroph	2.38568
Brassica/Grass	Podzol	Topsoil	Mucoromycota	Pathotroph	0.995748
Brassica/Grass	Podzol	Topsoil	Mucoromycota	Saprotroph	1.29953
Brassica/Grass	Podzol	Topsoil	Mucoromycota	Symbiotroph	-4.77148
Fallow	Luvisol	Subsoil	Ascomycota	Pathotroph	0.510606
Fallow	Luvisol	Subsoil	Ascomycota	Saprotroph	0.662876
Fallow	Luvisol	Subsoil	Ascomycota	Symbiotroph	0.275353
Fallow	Luvisol	Subsoil	Basidiomycota	Pathotroph	-1.48175
Fallow	Luvisol	Subsoil	Basidiomycota	Saprotroph	0.294289
Fallow	Luvisol	Subsoil	Basidiomycota	Symbiotroph	0.964356
Fallow	Luvisol	Subsoil	Mucoromycota	Pathotroph	0.990817
Fallow	Luvisol	Subsoil	Mucoromycota	Saprotroph	0.895004
Fallow	Luvisol	Topsoil	Ascomycota	Pathotroph	0.326281
Fallow	Luvisol	Topsoil	Ascomycota	Saprotroph	0.487068
Fallow	Luvisol	Topsoil	Ascomycota	Symbiotroph	0.753336
Fallow	Luvisol	Topsoil	Basidiomycota	Pathotroph	0.468168
Fallow	Luvisol	Topsoil	Basidiomycota	Saprotroph	0.434845
Fallow	Luvisol	Topsoil	Basidiomycota	Symbiotroph	-0.641781
Fallow	Luvisol	Topsoil	Chytridiomycota	Saprotroph	0.281071
Fallow	Luvisol	Topsoil	Mucoromycota	Pathotroph	0.948805
Fallow	Luvisol	Topsoil	Mucoromycota	Saprotroph	-0.0249045
Fallow	Luvisol	Topsoil	Mucoromycota	Symbiotroph	-0.945033
Fallow	Phaeozem	Subsoil	Ascomycota	Pathotroph	0.646302
Fallow	Phaeozem	Subsoil	Ascomycota	Saprotroph	-0.790134
Fallow	Phaeozem	Subsoil	Ascomycota	Symbiotroph	1.00126
Fallow	Phaeozem	Subsoil	Basidiomycota	Pathotroph	-3.60669
Fallow	Phaeozem	Subsoil	Basidiomycota	Saprotroph	0
Fallow	Phaeozem	Subsoil	Basidiomycota	Symbiotroph	-0.690276
Fallow	Phaeozem	Subsoil	Mucoromycota	Pathotroph	-3.06469
Fallow	Phaeozem	Subsoil	Mucoromycota	Saprotroph	-2.80186
Fallow	Phaeozem	Topsoil	Ascomycota	Pathotroph	0.59842
Fallow	Phaeozem	Topsoil	Ascomycota	Saprotroph	-0.216871
Fallow	Phaeozem	Topsoil	Ascomycota	Symbiotroph	-0.166561
Fallow	Phaeozem	Topsoil	Basidiomycota	Pathotroph	0.423796
Fallow	Phaeozem	Topsoil	Basidiomycota	Saprotroph	-0.166642
Fallow	Phaeozem	Topsoil	Basidiomycota	Symbiotroph	1.45391
Fallow	Phaeozem	Topsoil	Chytridiomycota	Saprotroph	-1.20037
Fallow	Phaeozem	Topsoil	Mucoromycota	Pathotroph	0.0979111
Fallow	Phaeozem	Topsoil	Mucoromycota	Saprotroph	-1.30962
Fallow	Phaeozem	Topsoil	Mucoromycota	Symbiotroph	-0.960406
Fallow	Podzol	Subsoil	Ascomycota	Pathotroph	0.973738
Fallow	Podzol	Subsoil	Ascomycota	Saprotroph	4.44172
Fallow	Podzol	Subsoil	Ascomycota	Symbiotroph	-0.184994
Fallow	Podzol	Subsoil	Basidiomycota	Pathotroph	4.03171
Fallow	Podzol	Subsoil	Basidiomycota	Saprotroph	1.11084
Fallow	Podzol	Subsoil	Basidiomycota	Symbiotroph	3.23856
Fallow	Podzol	Subsoil	Chytridiomycota	Saprotroph	-0.914441
Fallow	Podzol	Subsoil	Mucoromycota	Pathotroph	-0.901568
Fallow	Podzol	Subsoil	Mucoromycota	Saprotroph	2.22022
Fallow	Podzol	Subsoil	Mucoromycota	Symbiotroph	0
Fallow	Podzol	Topsoil	Ascomycota	Pathotroph	-1.09104
Fallow	Podzol	Topsoil	Ascomycota	Saprotroph	-0.85772
Fallow	Podzol	Topsoil	Ascomycota	Symbiotroph	-0.861328
Fallow	Podzol	Topsoil	Basidiomycota	Pathotroph	0.499029
Fallow	Podzol	Topsoil	Basidiomycota	Saprotroph	-1.72562
Fallow	Podzol	Topsoil	Basidiomycota	Symbiotroph	-3.80135
Fallow	Podzol	Topsoil	Chytridiomycota	Saprotroph	5.01404
Fallow	Podzol	Topsoil	Mucoromycota	Pathotroph	-5.98564
Fallow	Podzol	Topsoil	Mucoromycota	Saprotroph	-0.573408
Fallow	Podzol	Topsoil	Mucoromycota	Symbiotroph	0.86756
Legume/Grass	Luvisol	Subsoil	Ascomycota	Pathotroph	1.46288
Legume/Grass	Luvisol	Subsoil	Ascomycota	Saprotroph	-3.04873
Legume/Grass	Luvisol	Subsoil	Ascomycota	Symbiotroph	1.03656
Legume/Grass	Luvisol	Subsoil	Basidiomycota	Pathotroph	0.479422
Legume/Grass	Luvisol	Subsoil	Basidiomycota	Saprotroph	-1.27204
Legume/Grass	Luvisol	Subsoil	Basidiomycota	Symbiotroph	-0.0704383
Legume/Grass	Luvisol	Subsoil	Mucoromycota	Pathotroph	0.27599
Legume/Grass	Luvisol	Subsoil	Mucoromycota	Saprotroph	0.569296
Legume/Grass	Luvisol	Subsoil	Mucoromycota	Symbiotroph	3.44086
Legume/Grass	Luvisol	Topsoil	Ascomycota	Pathotroph	0.644396
Legume/Grass	Luvisol	Topsoil	Ascomycota	Saprotroph	1.42219
Legume/Grass	Luvisol	Topsoil	Ascomycota	Symbiotroph	0.281092
Legume/Grass	Luvisol	Topsoil	Basidiomycota	Pathotroph	1.18116
Legume/Grass	Luvisol	Topsoil	Basidiomycota	Saprotroph	-0.632805
Legume/Grass	Luvisol	Topsoil	Basidiomycota	Symbiotroph	2.29411
Legume/Grass	Luvisol	Topsoil	Chytridiomycota	Saprotroph	0
Legume/Grass	Luvisol	Topsoil	Mucoromycota	Pathotroph	-0.295176
Legume/Grass	Luvisol	Topsoil	Mucoromycota	Saprotroph	0.407034
Legume/Grass	Luvisol	Topsoil	Mucoromycota	Symbiotroph	-1.62675
Legume/Grass	Phaeozem	Subsoil	Ascomycota	Pathotroph	3.38525
Legume/Grass	Phaeozem	Subsoil	Ascomycota	Saprotroph	2.9891
Legume/Grass	Phaeozem	Subsoil	Ascomycota	Symbiotroph	3.79596
Legume/Grass	Phaeozem	Subsoil	Basidiomycota	Pathotroph	1.5919
Legume/Grass	Phaeozem	Subsoil	Basidiomycota	Saprotroph	0
Legume/Grass	Phaeozem	Subsoil	Basidiomycota	Symbiotroph	-0.368734
Legume/Grass	Phaeozem	Subsoil	Mucoromycota	Pathotroph	1.36561
Legume/Grass	Phaeozem	Subsoil	Mucoromycota	Saprotroph	-0.56954
Legume/Grass	Phaeozem	Topsoil	Ascomycota	Pathotroph	0.90432
Legume/Grass	Phaeozem	Topsoil	Ascomycota	Saprotroph	1.51998
Legume/Grass	Phaeozem	Topsoil	Ascomycota	Symbiotroph	1.16688
Legume/Grass	Phaeozem	Topsoil	Basidiomycota	Pathotroph	2.91961
Legume/Grass	Phaeozem	Topsoil	Basidiomycota	Saprotroph	-0.763728
Legume/Grass	Phaeozem	Topsoil	Basidiomycota	Symbiotroph	2.43272
Legume/Grass	Phaeozem	Topsoil	Chytridiomycota	Saprotroph	-3.83736
Legume/Grass	Phaeozem	Topsoil	Mucoromycota	Pathotroph	-1.12851
Legume/Grass	Phaeozem	Topsoil	Mucoromycota	Saprotroph	0.292117
Legume/Grass	Phaeozem	Topsoil	Mucoromycota	Symbiotroph	0.86935
Legume/Grass	Podzol	Subsoil	Ascomycota	Pathotroph	1.99475
Legume/Grass	Podzol	Subsoil	Ascomycota	Saprotroph	1.91762
Legume/Grass	Podzol	Subsoil	Ascomycota	Symbiotroph	2.7908
Legume/Grass	Podzol	Subsoil	Basidiomycota	Pathotroph	-0.950404
Legume/Grass	Podzol	Subsoil	Basidiomycota	Saprotroph	2.92713
Legume/Grass	Podzol	Subsoil	Chytridiomycota	Saprotroph	0
Legume/Grass	Podzol	Subsoil	Mucoromycota	Pathotroph	-0.660526
Legume/Grass	Podzol	Subsoil	Mucoromycota	Saprotroph	0.48746
Legume/Grass	Podzol	Subsoil	Mucoromycota	Symbiotroph	1.05849
Legume/Grass	Podzol	Topsoil	Ascomycota	Pathotroph	0.431635
Legume/Grass	Podzol	Topsoil	Ascomycota	Saprotroph	0.34552
Legume/Grass	Podzol	Topsoil	Ascomycota	Symbiotroph	-0.106405
Legume/Grass	Podzol	Topsoil	Basidiomycota	Pathotroph	-3.57721
Legume/Grass	Podzol	Topsoil	Basidiomycota	Saprotroph	0.38399
Legume/Grass	Podzol	Topsoil	Basidiomycota	Symbiotroph	1.91258
Legume/Grass	Podzol	Topsoil	Chytridiomycota	Saprotroph	1.88297
Legume/Grass	Podzol	Topsoil	Mucoromycota	Pathotroph	0.215926
Legume/Grass	Podzol	Topsoil	Mucoromycota	Saprotroph	-0.0885345
Legume/Grass	Podzol	Topsoil	Mucoromycota	Symbiotroph	-0.946958
Supplementary Table S6b
Summary of pairwise significance tests using multivariate analysis of variance (MANOVA) of the phylotype abundances for individual fungal phyla categorised into different trophic modes as defined in the FUNGUILD database at different sites with distinct soil properties and soil moisture conditions - drought (D) and rainfall-fed (RF) for different soil sampling depths
Confidence intervals: *p < 0.05, **p < 0.01, ***p < 0.001, ****p < 0.0001
Total number of samples, n = 119.
Phylum	Depth	trophic_mode_A	trophic_mode_B	Condition_A	Condition_B	p.adj	p.adj.signif
Ascomycota	Subsoil	Saprotroph	Pathotroph	Drought	Drought	1	ns
Ascomycota	Subsoil	Symbiotroph	Pathotroph	Drought	Drought	1	ns
Ascomycota	Subsoil	Pathotroph	Pathotroph	Rainfall_fed	Drought	1	ns
Ascomycota	Subsoil	Saprotroph	Pathotroph	Rainfall_fed	Drought	1	ns
Ascomycota	Subsoil	Symbiotroph	Pathotroph	Rainfall_fed	Drought	0.0031	**
Basidiomycota	Subsoil	Saprotroph	Pathotroph	Drought	Drought	1	ns
Basidiomycota	Subsoil	Symbiotroph	Pathotroph	Drought	Drought	1	ns
Basidiomycota	Subsoil	Pathotroph	Pathotroph	Rainfall_fed	Drought	1	ns
Basidiomycota	Subsoil	Saprotroph	Pathotroph	Rainfall_fed	Drought	1	ns
Basidiomycota	Subsoil	Symbiotroph	Pathotroph	Rainfall_fed	Drought	1	ns
Mucoromycota	Subsoil	Saprotroph	Pathotroph	Drought	Drought	0.22578	ns
Mucoromycota	Subsoil	Symbiotroph	Pathotroph	Drought	Drought	1	ns
Mucoromycota	Subsoil	Pathotroph	Pathotroph	Rainfall_fed	Drought	1	ns
Mucoromycota	Subsoil	Saprotroph	Pathotroph	Rainfall_fed	Drought	0.666894	ns
Mucoromycota	Subsoil	Symbiotroph	Pathotroph	Rainfall_fed	Drought	1	ns
Ascomycota	Topsoil	Saprotroph	Pathotroph	Drought	Drought	0.0266075	*
Ascomycota	Topsoil	Symbiotroph	Pathotroph	Drought	Drought	0.931455	ns
Ascomycota	Topsoil	Pathotroph	Pathotroph	Rainfall_fed	Drought	0.999999	ns
Ascomycota	Topsoil	Saprotroph	Pathotroph	Rainfall_fed	Drought	0.011248	*
Ascomycota	Topsoil	Symbiotroph	Pathotroph	Rainfall_fed	Drought	0.475283	ns
Basidiomycota	Topsoil	Saprotroph	Pathotroph	Drought	Drought	1	ns
Basidiomycota	Topsoil	Symbiotroph	Pathotroph	Drought	Drought	1	ns
Basidiomycota	Topsoil	Pathotroph	Pathotroph	Rainfall_fed	Drought	1	ns
Basidiomycota	Topsoil	Saprotroph	Pathotroph	Rainfall_fed	Drought	1	ns
Basidiomycota	Topsoil	Symbiotroph	Pathotroph	Rainfall_fed	Drought	1	ns
Mucoromycota	Topsoil	Saprotroph	Pathotroph	Drought	Drought	8.85958e-13	****
Mucoromycota	Topsoil	Symbiotroph	Pathotroph	Drought	Drought	1	ns
Mucoromycota	Topsoil	Pathotroph	Pathotroph	Rainfall_fed	Drought	1	ns
Mucoromycota	Topsoil	Saprotroph	Pathotroph	Rainfall_fed	Drought	8.85958e-13	****
Mucoromycota	Topsoil	Symbiotroph	Pathotroph	Rainfall_fed	Drought	1	ns
Ascomycota	Subsoil	Symbiotroph	Saprotroph	Drought	Drought	1	ns
Ascomycota	Subsoil	Pathotroph	Saprotroph	Rainfall_fed	Drought	1	ns
Ascomycota	Subsoil	Saprotroph	Saprotroph	Rainfall_fed	Drought	1	ns
Ascomycota	Subsoil	Symbiotroph	Saprotroph	Rainfall_fed	Drought	1	ns
Basidiomycota	Subsoil	Symbiotroph	Saprotroph	Drought	Drought	1	ns
Basidiomycota	Subsoil	Pathotroph	Saprotroph	Rainfall_fed	Drought	1	ns
Basidiomycota	Subsoil	Saprotroph	Saprotroph	Rainfall_fed	Drought	1	ns
Basidiomycota	Subsoil	Symbiotroph	Saprotroph	Rainfall_fed	Drought	1	ns
Chytridiomycota	Subsoil	Saprotroph	Saprotroph	Rainfall_fed	Drought	1	ns
Mucoromycota	Subsoil	Symbiotroph	Saprotroph	Drought	Drought	0.745989	ns
Mucoromycota	Subsoil	Pathotroph	Saprotroph	Rainfall_fed	Drought	1	ns
Mucoromycota	Subsoil	Saprotroph	Saprotroph	Rainfall_fed	Drought	1	ns
Mucoromycota	Subsoil	Symbiotroph	Saprotroph	Rainfall_fed	Drought	0.344149	ns
Ascomycota	Topsoil	Symbiotroph	Saprotroph	Drought	Drought	0.999966	ns
Ascomycota	Topsoil	Pathotroph	Saprotroph	Rainfall_fed	Drought	0.831767	ns
Ascomycota	Topsoil	Saprotroph	Saprotroph	Rainfall_fed	Drought	1	ns
Ascomycota	Topsoil	Symbiotroph	Saprotroph	Rainfall_fed	Drought	1	ns
Basidiomycota	Topsoil	Symbiotroph	Saprotroph	Drought	Drought	1	ns
Basidiomycota	Topsoil	Pathotroph	Saprotroph	Rainfall_fed	Drought	1	ns
Basidiomycota	Topsoil	Saprotroph	Saprotroph	Rainfall_fed	Drought	1	ns
Basidiomycota	Topsoil	Symbiotroph	Saprotroph	Rainfall_fed	Drought	1	ns
Chytridiomycota	Topsoil	Saprotroph	Saprotroph	Rainfall_fed	Drought	1	ns
Mucoromycota	Topsoil	Symbiotroph	Saprotroph	Drought	Drought	8.85958e-13	****
Mucoromycota	Topsoil	Pathotroph	Saprotroph	Rainfall_fed	Drought	8.85958e-13	****
Mucoromycota	Topsoil	Saprotroph	Saprotroph	Rainfall_fed	Drought	1	ns
Mucoromycota	Topsoil	Symbiotroph	Saprotroph	Rainfall_fed	Drought	8.85958e-13	****
Ascomycota	Subsoil	Pathotroph	Symbiotroph	Rainfall_fed	Drought	1	ns
Ascomycota	Subsoil	Saprotroph	Symbiotroph	Rainfall_fed	Drought	1	ns
Ascomycota	Subsoil	Symbiotroph	Symbiotroph	Rainfall_fed	Drought	1	ns
Basidiomycota	Subsoil	Pathotroph	Symbiotroph	Rainfall_fed	Drought	1	ns
Basidiomycota	Subsoil	Saprotroph	Symbiotroph	Rainfall_fed	Drought	1	ns
Basidiomycota	Subsoil	Symbiotroph	Symbiotroph	Rainfall_fed	Drought	1	ns
Mucoromycota	Subsoil	Pathotroph	Symbiotroph	Rainfall_fed	Drought	1	ns
Mucoromycota	Subsoil	Saprotroph	Symbiotroph	Rainfall_fed	Drought	0.971786	ns
Mucoromycota	Subsoil	Symbiotroph	Symbiotroph	Rainfall_fed	Drought	0.0321	*
Ascomycota	Topsoil	Pathotroph	Symbiotroph	Rainfall_fed	Drought	1	ns
Ascomycota	Topsoil	Saprotroph	Symbiotroph	Rainfall_fed	Drought	0.999285	ns
Ascomycota	Topsoil	Symbiotroph	Symbiotroph	Rainfall_fed	Drought	1	ns
Basidiomycota	Topsoil	Pathotroph	Symbiotroph	Rainfall_fed	Drought	1	ns
Basidiomycota	Topsoil	Saprotroph	Symbiotroph	Rainfall_fed	Drought	1	ns
Basidiomycota	Topsoil	Symbiotroph	Symbiotroph	Rainfall_fed	Drought	1	ns
Mucoromycota	Topsoil	Pathotroph	Symbiotroph	Rainfall_fed	Drought	1	ns
Mucoromycota	Topsoil	Saprotroph	Symbiotroph	Rainfall_fed	Drought	8.85958e-13	****
Mucoromycota	Topsoil	Symbiotroph	Symbiotroph	Rainfall_fed	Drought	1	ns
Ascomycota	Subsoil	Saprotroph	Pathotroph	Rainfall_fed	Rainfall_fed	1	ns
Ascomycota	Subsoil	Symbiotroph	Pathotroph	Rainfall_fed	Rainfall_fed	1	ns
Basidiomycota	Subsoil	Saprotroph	Pathotroph	Rainfall_fed	Rainfall_fed	1	ns
Basidiomycota	Subsoil	Symbiotroph	Pathotroph	Rainfall_fed	Rainfall_fed	1	ns
Mucoromycota	Subsoil	Saprotroph	Pathotroph	Rainfall_fed	Rainfall_fed	0.640806	ns
Mucoromycota	Subsoil	Symbiotroph	Pathotroph	Rainfall_fed	Rainfall_fed	1	ns
Ascomycota	Topsoil	Saprotroph	Pathotroph	Rainfall_fed	Rainfall_fed	0.666183	ns
Ascomycota	Topsoil	Symbiotroph	Pathotroph	Rainfall_fed	Rainfall_fed	0.999978	ns
Basidiomycota	Topsoil	Saprotroph	Pathotroph	Rainfall_fed	Rainfall_fed	1	ns
Basidiomycota	Topsoil	Symbiotroph	Pathotroph	Rainfall_fed	Rainfall_fed	1	ns
Mucoromycota	Topsoil	Saprotroph	Pathotroph	Rainfall_fed	Rainfall_fed	8.86846e-13	****
Mucoromycota	Topsoil	Symbiotroph	Pathotroph	Rainfall_fed	Rainfall_fed	1	ns
Ascomycota	Subsoil	Symbiotroph	Saprotroph	Rainfall_fed	Rainfall_fed	1	ns
Basidiomycota	Subsoil	Symbiotroph	Saprotroph	Rainfall_fed	Rainfall_fed	1	ns
Mucoromycota	Subsoil	Symbiotroph	Saprotroph	Rainfall_fed	Rainfall_fed	0.778468	ns
Ascomycota	Topsoil	Symbiotroph	Saprotroph	Rainfall_fed	Rainfall_fed	1	ns
Basidiomycota	Topsoil	Symbiotroph	Saprotroph	Rainfall_fed	Rainfall_fed	1	ns
Mucoromycota	Topsoil	Symbiotroph	Saprotroph	Rainfall_fed	Rainfall_fed	8.85958e-13	****
