# Supplementary material
Source: Research Square preprint supplement (doi:10.21203/rs.3.rs-9052155/v1)
Supplement: Supplementary file 3 [file 17168638e0ec79fbf0eb116f.xlsx]

## Sheet: S1
Supplementary Table S1
Metadata comprising of soil physicochemical properties at the three sampling sites with different soil types from different soil sampling depths and under two soil moisture conditions
Site	Condition	Depth	Total_N_gN_kg-1soil	Total_organic_C_gC_kg-1soil	pH	Moisture_in_percentage	Density_g_cm-3
Luvisol	Drought	Topsoil	0.131109	1.36727	6.49175	14.3384	1.72047
Luvisol	Rainfall-fed	Topsoil	0.120529	1.17734	6.49175	16.1554	1.72125
Luvisol	Drought	Subsoil	0.0861595	0.870722	6.48434	14.3384	1.66266
Luvisol	Rainfall-fed	Subsoil	0.0803408	0.765544	6.48384	16.1554	1.65125
Phaeozem	Drought	Topsoil	0.120648	1.20717	7.14	29.4563	1.32484
Phaeozem	Rainfall-fed	Topsoil	0.12954	1.25593	7.14	30.4152	1.32484
Phaeozem	Drought	Subsoil	0.0633947	0.614094	7.235	29.4563	1.73555
Phaeozem	Rainfall-fed	Subsoil	0.0655476	0.55659	7.235	30.4152	1.71236
Podzol	Drought	Topsoil	0.129112	1.71995	5.21083	3.85243	1.40855
Podzol	Rainfall-fed	Topsoil	0.125894	1.79221	5.21083	5.58443	1.40855
Podzol	Drought	Subsoil	0.0649041	0.962963	5.21	3.85243	1.45598
Podzol	Rainfall-fed	Subsoil	0.0471845	0.930409	5.21	5.58443	1.45598
