# Supplementary material
Source: Research Square preprint supplement (doi:10.21203/rs.3.rs-9052155/v1)
Supplement: Supplementary file 4 [file 2498e32d25a1713313a5f6af.xlsx]

## Sheet: S9a-e
Supplementary Table S9a
Summary of Pairwise Wilcoxon test to evaluate the significant difference between protein expressions at the three sampling sites (Hohenschulen (Luvisol), Karkendamm (Podzol) and Reinshof (Phaeozem)) in the different soil sampling layers
Confidence intervals: *p < 0.05, **p < 0.01, ***p < 0.001, ****p < 0.0001
Variation	Depth	Soil_type_A	Soil_type_B	p.value_adjusted	p.value_adjusted_significance
Brassica/Grass	Subsoil	Luvisol	Phaeozem	0.732	ns
Brassica/Grass	Subsoil	Luvisol	Podzol	0.02	*
Brassica/Grass	Subsoil	Phaeozem	Podzol	0.179	ns
Brassica/Grass	Topsoil	Luvisol	Phaeozem	0.000573	***
Brassica/Grass	Topsoil	Luvisol	Podzol	0.000812	***
Brassica/Grass	Topsoil	Phaeozem	Podzol	0.849	ns
Fallow	Subsoil	Luvisol	Phaeozem	0.192	ns
Fallow	Subsoil	Luvisol	Podzol	0.078	ns
Fallow	Subsoil	Phaeozem	Podzol	0.83	ns
Fallow	Topsoil	Luvisol	Phaeozem	0.162	ns
Fallow	Topsoil	Luvisol	Podzol	4.5e-08	****
Fallow	Topsoil	Phaeozem	Podzol	0.000488	***
Legume/Grass	Subsoil	Luvisol	Phaeozem	0.845	ns
Legume/Grass	Subsoil	Luvisol	Podzol	0.68	ns
Legume/Grass	Subsoil	Phaeozem	Podzol	0.483	ns
Legume/Grass	Topsoil	Luvisol	Phaeozem	0.123	ns
Legume/Grass	Topsoil	Luvisol	Podzol	0.009	**
Legume/Grass	Topsoil	Phaeozem	Podzol	0.284	ns
Supplementary Table S9b
The mean of number of protein groups identified in soil profiles with distinct cover crop variations, considering the sampling sites with different soil types, soil profile depths and the soil moisture conditions
Soil_type	Variation	Condition	Depth	mean_Protein_groups
Luvisol	Brassica/Grass	Drought	Topsoil	413
Luvisol	Brassica/Grass	Drought	Subsoil	284
Luvisol	Brassica/Grass	Rainfall-fed	Topsoil	356
Luvisol	Brassica/Grass	Rainfall-fed	Subsoil	337
Luvisol	Fallow	Drought	Topsoil	409
Luvisol	Fallow	Drought	Subsoil	364
Luvisol	Fallow	Rainfall-fed	Topsoil	344
Luvisol	Fallow	Rainfall-fed	Subsoil	276
Luvisol	Legume/Grass	Drought	Topsoil	429
Luvisol	Legume/Grass	Drought	Subsoil	341
Luvisol	Legume/Grass	Rainfall-fed	Topsoil	353
Luvisol	Legume/Grass	Rainfall-fed	Subsoil	179
Podzol	Brassica/Grass	Drought	Topsoil	504
Podzol	Brassica/Grass	Drought	Subsoil	366
Podzol	Brassica/Grass	Rainfall-fed	Topsoil	362
Podzol	Brassica/Grass	Rainfall-fed	Subsoil	294
Podzol	Fallow	Drought	Topsoil	472
Podzol	Fallow	Drought	Subsoil	341
Podzol	Fallow	Rainfall-fed	Topsoil	470
Podzol	Fallow	Rainfall-fed	Subsoil	300
Podzol	Legume/Grass	Drought	Topsoil	470
Podzol	Legume/Grass	Drought	Subsoil	288
Podzol	Legume/Grass	Rainfall-fed	Topsoil	488
Podzol	Legume/Grass	Rainfall-fed	Subsoil	226
Phaeozem	Brassica/Grass	Drought	Topsoil	365
Phaeozem	Brassica/Grass	Drought	Subsoil	219
Phaeozem	Brassica/Grass	Rainfall-fed	Topsoil	369
Phaeozem	Brassica/Grass	Rainfall-fed	Subsoil	211
Phaeozem	Fallow	Drought	Topsoil	373
Phaeozem	Fallow	Drought	Subsoil	283
Phaeozem	Fallow	Rainfall-fed	Topsoil	366
Phaeozem	Fallow	Rainfall-fed	Subsoil	253
Phaeozem	Legume/Grass	Drought	Topsoil	364
Phaeozem	Legume/Grass	Drought	Subsoil	213
Phaeozem	Legume/Grass	Rainfall-fed	Topsoil	361
Phaeozem	Legume/Grass	Rainfall-fed	Subsoil	229
Supplementary Table S9c
Summary of the differential expression of the overall proteins estimated between the soil moisture conditions (drought (D) and rainfall-fed (RF)) taking into consideration other parameters of interest - cover crop variations, soil sampling sites with different soil types and soil sampling depths (aasessed by Wilcoxon and MANOVA tests)
For differential expression, if log2FC > 0.6. and p < 0.05, such comparison is classified as UP
	if log2FC < 0.6. and p < 0.05, such comparison is classified as DOWN
Variation	Soil_type	Depth	Condition_A	Condition_B	mean_LFQ_intensity	log2FC_(Drought/Rainfall-fed)	p.value_adjusted	Differential_expression
Brassica/Grass	Luvisol	Subsoil	Drought	Rainfall_fed	21899.6	1.01583	0.885	NO
Brassica/Grass	Luvisol	Topsoil	Drought	Rainfall_fed	9133.68	-0.360313	0.485	NO
Brassica/Grass	Phaeozem	Subsoil	Drought	Rainfall_fed	42623.7	0.800262	0.876	NO
Brassica/Grass	Phaeozem	Topsoil	Drought	Rainfall_fed	25703.6	-0.504344	0.0904	NO
Brassica/Grass	Podzol	Subsoil	Drought	Rainfall_fed	26836	0.164021	0.875	NO
Brassica/Grass	Podzol	Topsoil	Drought	Rainfall_fed	54158.8	0.899025	0.275	NO
Fallow	Luvisol	Subsoil	Drought	Rainfall_fed	5327.12	-0.691399	0.858	NO
Fallow	Luvisol	Topsoil	Drought	Rainfall_fed	6024.27	0.844063	0.00439	UP
Fallow	Phaeozem	Subsoil	Drought	Rainfall_fed	21588.7	0.853467	0.855	NO
Fallow	Phaeozem	Topsoil	Drought	Rainfall_fed	16001.7	0.0289252	0.899	NO
Fallow	Podzol	Subsoil	Drought	Rainfall_fed	15501.6	0.405189	0.488	NO
Fallow	Podzol	Topsoil	Drought	Rainfall_fed	36568.3	-0.370767	0.613	NO
Legume/Grass	Luvisol	Subsoil	Drought	Rainfall_fed	9558.59	-0.761544	0.0668	NO
Legume/Grass	Luvisol	Topsoil	Drought	Rainfall_fed	11907.4	-0.179158	0.519	NO
Legume/Grass	Phaeozem	Subsoil	Drought	Rainfall_fed	23603.6	-0.1176	0.373	NO
Legume/Grass	Phaeozem	Topsoil	Drought	Rainfall_fed	24913.2	0.206242	0.453	NO
Legume/Grass	Podzol	Subsoil	Drought	Rainfall_fed	20764	-0.292773	0.204	NO
Legume/Grass	Podzol	Topsoil	Drought	Rainfall_fed	36997.2	-0.196309	0.928	NO
Supplementary Table S9d
Summary of the differential expression of the overall proteins estimated between the soil variation types (fallow and cover crop mixtures) taking into consideration other parameters of interest - soil moisture conditions, soil sampling sites with different soil properties and soil sampling depths (aasessed by Wilcoxon and MANOVA tests)
For differential expression, if log2FC > 0.6. and p < 0.05, such comparison is classified as UP
	if log2FC < 0.6. and p < 0.05, such comparison is classified as DOWN
Soil_type	Depth	Variation	Condition	Variation_category_A	Variation_category_B	mean_LFQ_intensity	log2FC_(Mixture/Fallow)	p.value_adjusted	Differential_expression
Luvisol	Subsoil	Brassica/Grass	Drought	Fallow	Mixture	21899.6	1.65275	0.00619	UP
Luvisol	Subsoil	Brassica/Grass	Rainfall_fed	Fallow	Mixture	10830.3	0.636922	0.00619	UP
Luvisol	Subsoil	Legume/Grass	Drought	Fallow	Mixture	9558.59	0.456715	0.00619	NO
Luvisol	Subsoil	Legume/Grass	Rainfall_fed	Fallow	Mixture	16204.7	1.21826	0.00619	UP
Luvisol	Topsoil	Brassica/Grass	Drought	Fallow	Mixture	9133.68	0.961575	0.0428	UP
Luvisol	Topsoil	Brassica/Grass	Rainfall_fed	Fallow	Mixture	11724.9	1.32189	0.0428	UP
Luvisol	Topsoil	Legume/Grass	Drought	Fallow	Mixture	11907.4	1.34417	0.0428	UP
Luvisol	Topsoil	Legume/Grass	Rainfall_fed	Fallow	Mixture	13481.9	1.52333	0.0428	UP
Phaeozem	Subsoil	Brassica/Grass	Drought	Fallow	Mixture	42623.7	1.3459	0.487	NO
Phaeozem	Subsoil	Brassica/Grass	Rainfall_fed	Fallow	Mixture	24476.5	0.54564	0.487	NO
Phaeozem	Subsoil	Legume/Grass	Drought	Fallow	Mixture	23603.6	0.493252	0.487	NO
Phaeozem	Subsoil	Legume/Grass	Rainfall_fed	Fallow	Mixture	25608.2	0.610852	0.487	NO
Phaeozem	Topsoil	Brassica/Grass	Drought	Fallow	Mixture	25703.6	0.698137	0.000691	UP
Phaeozem	Topsoil	Brassica/Grass	Rainfall_fed	Fallow	Mixture	36460.1	1.20248	0.000691	UP
Phaeozem	Topsoil	Legume/Grass	Drought	Fallow	Mixture	24913.2	0.653074	0.000691	UP
Phaeozem	Topsoil	Legume/Grass	Rainfall_fed	Fallow	Mixture	21594.6	0.446833	0.000691	NO
Podzol	Subsoil	Brassica/Grass	Drought	Fallow	Mixture	26836	0.980167	0.0105	UP
Podzol	Subsoil	Brassica/Grass	Rainfall_fed	Fallow	Mixture	23952.1	0.816146	0.0105	UP
Podzol	Subsoil	Legume/Grass	Drought	Fallow	Mixture	20764	0.610076	0.0105	UP
Podzol	Subsoil	Legume/Grass	Rainfall_fed	Fallow	Mixture	25435.7	0.902849	0.0105	UP
Podzol	Topsoil	Brassica/Grass	Drought	Fallow	Mixture	54158.8	0.36934	0.853	NO
Podzol	Topsoil	Brassica/Grass	Rainfall_fed	Fallow	Mixture	29042.6	-0.529685	0.853	NO
Podzol	Topsoil	Legume/Grass	Drought	Fallow	Mixture	36997.2	-0.180439	0.853	NO
Podzol	Topsoil	Legume/Grass	Rainfall_fed	Fallow	Mixture	42390	0.0158701	0.853	NO
Supplementary Table S9e
Summary of the differential expression of the overall proteins estimated between the soil sampling depths (topsoil and subsoil) taking into consideration other parameters of interest - soil moisture conditions, soil sampling sites with different soil properties and cover crop variations (aasessed by Wilcoxon and MANOVA tests)
For differential expression, if log2FC > 0.6. and p < 0.05, such comparison is classified as UP
	if log2FC < 0.6. and p < 0.05, such comparison is classified as DOWN
Variation	Soil_type	Condition	Type	Depth_A	Depth_B	mean_LFQ_intensity	log2FC_(Topsoil/Subsoil)	p.value_adjusted	Differential_expression
Brassica/Grass	Luvisol	Drought	Mixture	Subsoil	Topsoil	9133.68	-0.841341	0.935	NO
Brassica/Grass	Luvisol	Rainfall_fed	Mixture	Subsoil	Topsoil	11724.9	-0.481028	0.935	NO
Brassica/Grass	Phaeozem	Drought	Mixture	Subsoil	Topsoil	25703.6	-0.384345	0.0105	NO
Brassica/Grass	Phaeozem	Rainfall_fed	Mixture	Subsoil	Topsoil	36460.1	0.119999	0.0105	NO
Brassica/Grass	Podzol	Drought	Mixture	Subsoil	Topsoil	54158.8	1.0927	0.175	NO
Brassica/Grass	Podzol	Rainfall_fed	Mixture	Subsoil	Topsoil	29042.6	0.193679	0.175	NO
Fallow	Luvisol	Drought	Fallow	Subsoil	Topsoil	6024.27	-0.209297	0.0465	NO
Fallow	Luvisol	Rainfall_fed	Fallow	Subsoil	Topsoil	3355.95	-1.05336	0.0465	DOWN
Fallow	Phaeozem	Drought	Fallow	Subsoil	Topsoil	16001.7	-0.0675298	0.56	NO
Fallow	Phaeozem	Rainfall_fed	Fallow	Subsoil	Topsoil	15684.1	-0.096455	0.56	NO
Fallow	Podzol	Drought	Fallow	Subsoil	Topsoil	36568.3	1.42659	2.88e-06	UP
Fallow	Podzol	Rainfall_fed	Fallow	Subsoil	Topsoil	47284.3	1.79736	2.88e-06	UP
Legume/Grass	Luvisol	Drought	Mixture	Subsoil	Topsoil	11907.4	-0.113454	0.124	NO
Legume/Grass	Luvisol	Rainfall_fed	Mixture	Subsoil	Topsoil	13481.9	0.0657041	0.124	NO
Legume/Grass	Phaeozem	Drought	Mixture	Subsoil	Topsoil	24913.2	0.0179046	0.00304	NO
Legume/Grass	Phaeozem	Rainfall_fed	Mixture	Subsoil	Topsoil	21594.6	-0.188337	0.00304	NO
Legume/Grass	Podzol	Drought	Mixture	Subsoil	Topsoil	36997.2	0.679535	0.00016	UP
Legume/Grass	Podzol	Rainfall_fed	Mixture	Subsoil	Topsoil	42390	0.875844	0.00016	UP
