# Supplementary material
Source: Research Square preprint supplement (doi:10.21203/rs.3.rs-9052155/v1)
Supplement: Supplementary file 5 [file 4efd462e00bf379b577f8457.xlsx]

## Sheet: S5a-d
Supplementary Table S5a
Summary of Partial Mantel's test of the effect of soil physicochemical properties on each individual fungal phylum with different cover crop variations
Variation	Phylum	Soil_physicochemical_properties	r	p.value	p.value_significance
Fallow	Ascomycota	TN	0.306212	0.227519
Brassica/Grass	Ascomycota	TN	0.425618	0.0574244
Legume/Grass	Ascomycota	TN	0.668038	0.0011924	**
Fallow	Basidiomycota	TN	-0.293424	0.248052
Brassica/Grass	Basidiomycota	TN	-0.436003	0.0499971	*
Legume/Grass	Basidiomycota	TN	-0.545073	0.00890279	**
Fallow	Mucoromycota	TN	-0.00297517	0.986677
Brassica/Grass	Mucoromycota	TN	0.027714	0.952476
Legume/Grass	Mucoromycota	TN	-0.317801	0.206252
Fallow	Cryptomycota	TN	0.126301	0.685309
Brassica/Grass	Cryptomycota	TN	0.118744	0.687783
Legume/Grass	Cryptomycota	TN	0.207848	0.434395
Fallow	Zoopagomycota	TN	0.0704039	0.850263
Brassica/Grass	Zoopagomycota	TN	0.255652	0.336881
Legume/Grass	Zoopagomycota	TN	0.482048	0.0217426	*
Fallow	Chytridiomycota	TN	0.0789062	0.825575
Brassica/Grass	Chytridiomycota	TN	0.365064	0.121238
Legume/Grass	Chytridiomycota	TN	0.358458	0.123715
Fallow	Aphelidiomycota	TN	0.208899	0.434395
Brassica/Grass	Aphelidiomycota	TN	0.199147	0.434395
Legume/Grass	Aphelidiomycota	TN	0.118491	0.687783
Legume/Grass	Entorrhizomycota	TN	-0.30856	0.213507
Fallow	Olpidiomycota	TN	0.221648	0.434395
Brassica/Grass	Olpidiomycota	TN	-0.00872971	0.973608
Legume/Grass	Olpidiomycota	TN	0.363205	0.121304
Fallow	Blastocladiomycota	TN	-0.18865	0.469901
Brassica/Grass	Blastocladiomycota	TN	-0.0266389	0.952476
Legume/Grass	Blastocladiomycota	TN	0.153305	0.574153
Fallow	Ascomycota	TOC	-0.0601351	0.887657
Brassica/Grass	Ascomycota	TOC	0.234442	0.387261
Legume/Grass	Ascomycota	TOC	0.554591	0.00890279	**
Fallow	Basidiomycota	TOC	-0.155003	0.574153
Brassica/Grass	Basidiomycota	TOC	-0.294484	0.227519
Legume/Grass	Basidiomycota	TOC	-0.398797	0.0771729
Fallow	Mucoromycota	TOC	0.0171066	0.962473
Brassica/Grass	Mucoromycota	TOC	0.0723291	0.836362
Legume/Grass	Mucoromycota	TOC	-0.199587	0.434395
Fallow	Cryptomycota	TOC	0.401364	0.0841729
Brassica/Grass	Cryptomycota	TOC	0.328687	0.185366
Legume/Grass	Cryptomycota	TOC	0.571389	0.00745699	**
Fallow	Zoopagomycota	TOC	-0.271217	0.313112
Brassica/Grass	Zoopagomycota	TOC	0.0519102	0.906043
Legume/Grass	Zoopagomycota	TOC	0.298321	0.227519
Fallow	Chytridiomycota	TOC	0.221451	0.434395
Brassica/Grass	Chytridiomycota	TOC	0.542194	0.00890279	**
Legume/Grass	Chytridiomycota	TOC	0.298353	0.227519
Fallow	Aphelidiomycota	TOC	0.321095	0.208628
Brassica/Grass	Aphelidiomycota	TOC	0.274874	0.276576
Legume/Grass	Aphelidiomycota	TOC	0.482332	0.0217426	*
Legume/Grass	Entorrhizomycota	TOC	-0.121648	0.685309
Fallow	Olpidiomycota	TOC	0.0461948	0.935414
Brassica/Grass	Olpidiomycota	TOC	0.0265947	0.952476
Legume/Grass	Olpidiomycota	TOC	0.289205	0.239167
Fallow	Blastocladiomycota	TOC	-0.207589	0.434395
Brassica/Grass	Blastocladiomycota	TOC	-0.101828	0.739412
Legume/Grass	Blastocladiomycota	TOC	0.0186537	0.962473
Fallow	Ascomycota	pH	0.525869	0.0151044	*
Brassica/Grass	Ascomycota	pH	0.451277	0.0401495	*
Legume/Grass	Ascomycota	pH	0.0369505	0.941773
Fallow	Basidiomycota	pH	-0.162812	0.562476
Brassica/Grass	Basidiomycota	pH	-0.361242	0.121658
Legume/Grass	Basidiomycota	pH	-0.187764	0.454684
Fallow	Mucoromycota	pH	-0.0160758	0.962473
Brassica/Grass	Mucoromycota	pH	-0.107446	0.724196
Legume/Grass	Mucoromycota	pH	-0.1815	0.471145
Fallow	Cryptomycota	pH	-0.502107	0.0217426	*
Brassica/Grass	Cryptomycota	pH	-0.566127	0.00745699	**
Legume/Grass	Cryptomycota	pH	-0.646816	0.0014153	**
Fallow	Zoopagomycota	pH	0.603749	0.00730747	**
Brassica/Grass	Zoopagomycota	pH	0.52535	0.011686	*
Legume/Grass	Zoopagomycota	pH	0.254119	0.336909
Fallow	Chytridiomycota	pH	-0.244076	0.383117
Brassica/Grass	Chytridiomycota	pH	-0.424621	0.0574244
Legume/Grass	Chytridiomycota	pH	0.0199892	0.962473
Fallow	Aphelidiomycota	pH	-0.322518	0.208628
Brassica/Grass	Aphelidiomycota	pH	-0.201956	0.434395
Legume/Grass	Aphelidiomycota	pH	-0.537167	0.00929178	**
Legume/Grass	Entorrhizomycota	pH	-0.223803	0.414469
Fallow	Olpidiomycota	pH	0.201556	0.442757
Brassica/Grass	Olpidiomycota	pH	-0.0927174	0.772869
Legume/Grass	Olpidiomycota	pH	0.0757821	0.825575
Fallow	Blastocladiomycota	pH	0.0416349	0.935414
Brassica/Grass	Blastocladiomycota	pH	0.200036	0.434395
Legume/Grass	Blastocladiomycota	pH	0.202251	0.434395
Fallow	Ascomycota	Moisture	0.451926	0.0486196	*
Brassica/Grass	Ascomycota	Moisture	0.422181	0.0578026
Legume/Grass	Ascomycota	Moisture	0.0426463	0.935414
Fallow	Basidiomycota	Moisture	-0.155835	0.574153
Brassica/Grass	Basidiomycota	Moisture	-0.37908	0.098894
Legume/Grass	Basidiomycota	Moisture	-0.136602	0.622638
Fallow	Mucoromycota	Moisture	-0.0171082	0.962473
Brassica/Grass	Mucoromycota	Moisture	-0.187951	0.454684
Legume/Grass	Mucoromycota	Moisture	-0.198788	0.434395
Fallow	Cryptomycota	Moisture	-0.41441	0.0741076
Brassica/Grass	Cryptomycota	Moisture	-0.546696	0.00890279	**
Legume/Grass	Cryptomycota	Moisture	-0.575376	0.00745699	**
Fallow	Zoopagomycota	Moisture	0.520565	0.0159851	*
Brassica/Grass	Zoopagomycota	Moisture	0.484461	0.0217426	*
Legume/Grass	Zoopagomycota	Moisture	0.250585	0.344987
Fallow	Chytridiomycota	Moisture	-0.195537	0.454684
Brassica/Grass	Chytridiomycota	Moisture	-0.34213	0.155546
Legume/Grass	Chytridiomycota	Moisture	-0.0588924	0.887657
Fallow	Aphelidiomycota	Moisture	-0.306686	0.227519
Brassica/Grass	Aphelidiomycota	Moisture	-0.212709	0.434395
Legume/Grass	Aphelidiomycota	Moisture	-0.481448	0.0217426	*
Legume/Grass	Entorrhizomycota	Moisture	-0.180093	0.471876
Fallow	Olpidiomycota	Moisture	0.208912	0.434395
Brassica/Grass	Olpidiomycota	Moisture	-0.0959309	0.763171
Legume/Grass	Olpidiomycota	Moisture	0.00586282	0.979928
Fallow	Blastocladiomycota	Moisture	-0.0357908	0.941773
Brassica/Grass	Blastocladiomycota	Moisture	0.229701	0.395035
Legume/Grass	Blastocladiomycota	Moisture	0.203379	0.434395
Fallow	Ascomycota	Density	-0.142211	0.622456
Brassica/Grass	Ascomycota	Density	0.187811	0.454684
Legume/Grass	Ascomycota	Density	-0.394557	0.0805056
Fallow	Basidiomycota	Density	0.179308	0.49359
Brassica/Grass	Basidiomycota	Density	-0.243266	0.362609
Legume/Grass	Basidiomycota	Density	0.151904	0.574153
Fallow	Mucoromycota	Density	0.0915065	0.786549
Brassica/Grass	Mucoromycota	Density	-0.0326472	0.94453
Legume/Grass	Mucoromycota	Density	0.246775	0.354334
Fallow	Cryptomycota	Density	-0.10852	0.728612
Brassica/Grass	Cryptomycota	Density	-0.413863	0.0651584
Legume/Grass	Cryptomycota	Density	-0.0110685	0.973608
Fallow	Zoopagomycota	Density	-0.0847914	0.806295
Brassica/Grass	Zoopagomycota	Density	0.316052	0.206252
Legume/Grass	Zoopagomycota	Density	-0.406219	0.0723758
Fallow	Chytridiomycota	Density	0.0357605	0.941773
Brassica/Grass	Chytridiomycota	Density	-0.316089	0.206252
Legume/Grass	Chytridiomycota	Density	0.231539	0.393409
Fallow	Aphelidiomycota	Density	-0.0102897	0.973608
Brassica/Grass	Aphelidiomycota	Density	-0.113391	0.70033
Legume/Grass	Aphelidiomycota	Density	-0.0520575	0.906043
Legume/Grass	Entorrhizomycota	Density	0.0216252	0.962473
Fallow	Olpidiomycota	Density	-0.214652	0.434395
Brassica/Grass	Olpidiomycota	Density	-0.144994	0.593987
Legume/Grass	Olpidiomycota	Density	0.116219	0.692621
Fallow	Blastocladiomycota	Density	0.0879613	0.797396
Brassica/Grass	Blastocladiomycota	Density	0.294484	0.227519
Legume/Grass	Blastocladiomycota	Density	-0.0414746	0.935414
Supplementary Table S5b
Summary of Partial Mantel's test of the effect of soil physicochemical properties on each individual fungal phylum at different sites with different soil types
Soil_type	Phylum	Soil_physicochemical_properties	r	p.value	p.value_significance
Luvisol	Ascomycota	TN	0.380808	0.150996
Podzol	Ascomycota	TN	0.2734	0.40214
Phaeozem	Ascomycota	TN	0.805473	4.27945e-07	***
Luvisol	Basidiomycota	TN	-0.330878	0.254612
Podzol	Basidiomycota	TN	-0.396338	0.150996
Phaeozem	Basidiomycota	TN	-0.600143	0.00351041	**
Luvisol	Mucoromycota	TN	-0.0831008	0.844537
Podzol	Mucoromycota	TN	-0.139236	0.708393
Phaeozem	Mucoromycota	TN	-0.263705	0.426873
Luvisol	Cryptomycota	TN	0.238465	0.452719
Podzol	Cryptomycota	TN	0.367922	0.17305
Phaeozem	Cryptomycota	TN	0.111782	0.813986
Luvisol	Zoopagomycota	TN	0.104462	0.819243
Podzol	Zoopagomycota	TN	0.211477	0.54544
Phaeozem	Zoopagomycota	TN	0.498603	0.0418137	*
Luvisol	Chytridiomycota	TN	0.388599	0.150996
Podzol	Chytridiomycota	TN	0.23933	0.465212
Phaeozem	Chytridiomycota	TN	0.0976856	0.844537
Luvisol	Aphelidiomycota	TN	0.140134	0.699486
Podzol	Aphelidiomycota	TN	0.280194	0.400712
Phaeozem	Aphelidiomycota	TN	0.0979911	0.844537
Podzol	Entorrhizomycota	TN	-0.265668	0.419835
Luvisol	Olpidiomycota	TN	0.268107	0.40214
Podzol	Olpidiomycota	TN	0.158274	0.679142
Phaeozem	Olpidiomycota	TN	0.26506	0.426873
Luvisol	Blastocladiomycota	TN	-0.202878	0.54544
Podzol	Blastocladiomycota	TN	0.178103	0.61368
Phaeozem	Blastocladiomycota	TN	-0.0301197	0.942685
Luvisol	Ascomycota	TOC	0.379463	0.150996
Podzol	Ascomycota	TOC	0.234291	0.481809
Phaeozem	Ascomycota	TOC	0.817074	2.62431e-07	***
Luvisol	Basidiomycota	TOC	-0.316407	0.282014
Podzol	Basidiomycota	TOC	-0.442496	0.0906917
Phaeozem	Basidiomycota	TOC	-0.615373	0.00260609	**
Luvisol	Mucoromycota	TOC	-0.0824998	0.844537
Podzol	Mucoromycota	TOC	-0.0734603	0.854136
Phaeozem	Mucoromycota	TOC	-0.279306	0.40214
Luvisol	Cryptomycota	TOC	0.222354	0.493024
Podzol	Cryptomycota	TOC	0.370189	0.17305
Phaeozem	Cryptomycota	TOC	0.156041	0.691522
Luvisol	Zoopagomycota	TOC	0.125674	0.74656
Podzol	Zoopagomycota	TOC	0.242526	0.458265
Phaeozem	Zoopagomycota	TOC	0.489625	0.0460935	*
Luvisol	Chytridiomycota	TOC	0.374949	0.150996
Podzol	Chytridiomycota	TOC	0.2579	0.426873
Phaeozem	Chytridiomycota	TOC	0.0864019	0.844537
Luvisol	Aphelidiomycota	TOC	0.136218	0.708393
Podzol	Aphelidiomycota	TOC	0.388277	0.150996
Phaeozem	Aphelidiomycota	TOC	0.0904796	0.844537
Podzol	Entorrhizomycota	TOC	-0.189424	0.577773
Luvisol	Olpidiomycota	TOC	0.302705	0.331152
Podzol	Olpidiomycota	TOC	0.1125	0.813986
Phaeozem	Olpidiomycota	TOC	0.254639	0.435286
Luvisol	Blastocladiomycota	TOC	-0.186878	0.577773
Podzol	Blastocladiomycota	TOC	0.170446	0.628296
Phaeozem	Blastocladiomycota	TOC	-0.064381	0.867005
Luvisol	Ascomycota	pH	0.436574	0.087862
Podzol	Ascomycota	pH	-0.0717692	0.854136
Phaeozem	Ascomycota	pH	-0.84596	4.18325e-08	***
Luvisol	Basidiomycota	pH	-0.107718	0.813986
Podzol	Basidiomycota	pH	-0.208286	0.54544
Phaeozem	Basidiomycota	pH	0.656904	0.000855929	***
Luvisol	Mucoromycota	pH	-0.058833	0.872822
Podzol	Mucoromycota	pH	0.00340539	0.991429
Phaeozem	Mucoromycota	pH	0.342269	0.256016
Luvisol	Cryptomycota	pH	0.409068	0.128573
Podzol	Cryptomycota	pH	0.146581	0.699486
Phaeozem	Cryptomycota	pH	0.0449354	0.914647
Luvisol	Zoopagomycota	pH	-0.0223755	0.956937
Podzol	Zoopagomycota	pH	-0.0287937	0.942685
Phaeozem	Zoopagomycota	pH	-0.614177	0.00260609	**
Luvisol	Chytridiomycota	pH	0.364462	0.169094
Podzol	Chytridiomycota	pH	-0.0904118	0.844537
Phaeozem	Chytridiomycota	pH	0.00364625	0.991429
Luvisol	Aphelidiomycota	pH	-0.213436	0.511642
Podzol	Aphelidiomycota	pH	0.0308899	0.942685
Phaeozem	Aphelidiomycota	pH	0.0717667	0.854136
Podzol	Entorrhizomycota	pH	-0.070014	0.854136
Luvisol	Olpidiomycota	pH	0.153769	0.679142
Podzol	Olpidiomycota	pH	-0.0421259	0.914647
Phaeozem	Olpidiomycota	pH	-0.503401	0.0418137	*
Luvisol	Blastocladiomycota	pH	-0.274659	0.399751
Podzol	Blastocladiomycota	pH	0.28802	0.393646
Phaeozem	Blastocladiomycota	pH	0.153761	0.691522
Luvisol	Ascomycota	Moisture	-0.245038	0.435286
Podzol	Ascomycota	Moisture	-0.04643	0.914647
Phaeozem	Ascomycota	Moisture	-0.0556896	0.88755
Luvisol	Basidiomycota	Moisture	0.192011	0.566466
Podzol	Basidiomycota	Moisture	-0.0192377	0.960691
Phaeozem	Basidiomycota	Moisture	-0.0126754	0.96687
Luvisol	Mucoromycota	Moisture	0.214516	0.511642
Podzol	Mucoromycota	Moisture	0.20601	0.548594
Phaeozem	Mucoromycota	Moisture	0.138567	0.715627
Luvisol	Cryptomycota	Moisture	-0.011498	0.96687
Podzol	Cryptomycota	Moisture	-0.29316	0.382477
Phaeozem	Cryptomycota	Moisture	-0.0279423	0.942685
Luvisol	Zoopagomycota	Moisture	-0.278093	0.393646
Podzol	Zoopagomycota	Moisture	-0.151412	0.691522
Phaeozem	Zoopagomycota	Moisture	0.12136	0.78616
Luvisol	Chytridiomycota	Moisture	-0.0989918	0.84294
Podzol	Chytridiomycota	Moisture	0.228549	0.493024
Phaeozem	Chytridiomycota	Moisture	0.0812789	0.854136
Luvisol	Aphelidiomycota	Moisture	0.0743785	0.854136
Podzol	Aphelidiomycota	Moisture	0.030166	0.942685
Phaeozem	Aphelidiomycota	Moisture	-0.090234	0.844537
Podzol	Entorrhizomycota	Moisture	0.176471	0.61368
Luvisol	Olpidiomycota	Moisture	-0.184221	0.577773
Podzol	Olpidiomycota	Moisture	0.181044	0.61346
Phaeozem	Olpidiomycota	Moisture	-0.0641845	0.867005
Luvisol	Blastocladiomycota	Moisture	0.0843268	0.844537
Podzol	Blastocladiomycota	Moisture	-0.0805248	0.854136
Phaeozem	Blastocladiomycota	Moisture	0.177368	0.61368
Luvisol	Ascomycota	Density	0.318204	0.282014
Podzol	Ascomycota	Density	-0.0647204	0.867005
Phaeozem	Ascomycota	Density	-0.306545	0.363282
Luvisol	Basidiomycota	Density	-0.0386155	0.918952
Podzol	Basidiomycota	Density	-0.11983	0.78616
Phaeozem	Basidiomycota	Density	0.260211	0.426873
Luvisol	Mucoromycota	Density	0.068717	0.854136
Podzol	Mucoromycota	Density	0.0718188	0.854136
Phaeozem	Mucoromycota	Density	0.0430604	0.914647
Luvisol	Cryptomycota	Density	0.373843	0.150996
Podzol	Cryptomycota	Density	-0.014947	0.96687
Phaeozem	Cryptomycota	Density	-0.00191395	0.991429
Luvisol	Zoopagomycota	Density	-0.0534225	0.88755
Podzol	Zoopagomycota	Density	-0.226099	0.496591
Phaeozem	Zoopagomycota	Density	-0.206168	0.555586
Luvisol	Chytridiomycota	Density	0.139662	0.699486
Podzol	Chytridiomycota	Density	0.175526	0.61368
Phaeozem	Chytridiomycota	Density	-0.0218537	0.957052
Luvisol	Aphelidiomycota	Density	-0.142655	0.699486
Podzol	Aphelidiomycota	Density	-0.199351	0.566466
Phaeozem	Aphelidiomycota	Density	0.0911152	0.844537
Podzol	Entorrhizomycota	Density	0.0916643	0.844537
Luvisol	Olpidiomycota	Density	0.0503586	0.895108
Podzol	Olpidiomycota	Density	-0.189142	0.577773
Phaeozem	Olpidiomycota	Density	-0.302617	0.370009
Luvisol	Blastocladiomycota	Density	-0.394089	0.150996
Podzol	Blastocladiomycota	Density	-0.0145742	0.96687
Phaeozem	Blastocladiomycota	Density	0.275256	0.402929
Supplementary Table S5c
Summary of Partial Mantel's test of the effect of soil physicochemical properties on each individual fungal phylum at different soil sampling depths
Depth	Phylum	Soil_physicochemical_properties	r	p.value	p.value_significance
Topsoil	Ascomycota	TN	-0.0630847	0.817006
Subsoil	Ascomycota	TN	0.211381	0.349217
Topsoil	Basidiomycota	TN	0.0158876	0.929672
Subsoil	Basidiomycota	TN	-0.254356	0.224169
Topsoil	Mucoromycota	TN	-0.0421202	0.880006
Subsoil	Mucoromycota	TN	0.0238617	0.901095
Topsoil	Cryptomycota	TN	0.051231	0.843669
Subsoil	Cryptomycota	TN	-0.00431288	0.975549
Topsoil	Zoopagomycota	TN	-0.180131	0.452541
Subsoil	Zoopagomycota	TN	0.483163	0.00181052	**
Topsoil	Chytridiomycota	TN	0.0372855	0.880006
Subsoil	Chytridiomycota	TN	0.201073	0.372043
Topsoil	Aphelidiomycota	TN	-0.119329	0.63559
Subsoil	Aphelidiomycota	TN	0.447889	0.00457829	**
Subsoil	Entorrhizomycota	TN	-0.22414	0.316603
Topsoil	Olpidiomycota	TN	0.2169	0.332571
Subsoil	Olpidiomycota	TN	-0.104076	0.702245
Topsoil	Blastocladiomycota	TN	-0.170115	0.461142
Subsoil	Blastocladiomycota	TN	0.095832	0.734552
Topsoil	Ascomycota	TOC	-0.512515	0.000754032	***
Subsoil	Ascomycota	TOC	0.10467	0.702245
Topsoil	Basidiomycota	TOC	0.394717	0.0172317	*
Subsoil	Basidiomycota	TOC	-0.198983	0.373121
Topsoil	Mucoromycota	TOC	0.0746256	0.774797
Subsoil	Mucoromycota	TOC	0.083963	0.774797
Topsoil	Cryptomycota	TOC	0.529147	0.000439703	***
Subsoil	Cryptomycota	TOC	0.304135	0.106176
Topsoil	Zoopagomycota	TOC	-0.479216	0.00192073	**
Subsoil	Zoopagomycota	TOC	0.174257	0.452541
Topsoil	Chytridiomycota	TOC	0.158946	0.516683
Subsoil	Chytridiomycota	TOC	0.306815	0.105098
Topsoil	Aphelidiomycota	TOC	0.472836	0.00221591	**
Subsoil	Aphelidiomycota	TOC	0.415229	0.0105026	*
Subsoil	Entorrhizomycota	TOC	-0.0225549	0.901095
Topsoil	Olpidiomycota	TOC	0.138757	0.563342
Subsoil	Olpidiomycota	TOC	-0.136763	0.563342
Topsoil	Blastocladiomycota	TOC	-0.178339	0.452541
Subsoil	Blastocladiomycota	TOC	-0.0234544	0.901095
Topsoil	Ascomycota	pH	0.753265	4.74722e-09	***
Subsoil	Ascomycota	pH	0.0323878	0.893128
Topsoil	Basidiomycota	pH	-0.586382	4.17394e-05	***
Subsoil	Basidiomycota	pH	-0.13768	0.563342
Topsoil	Mucoromycota	pH	-0.203201	0.37095
Subsoil	Mucoromycota	pH	-0.0746991	0.774797
Topsoil	Cryptomycota	pH	-0.750259	4.74722e-09	***
Subsoil	Cryptomycota	pH	-0.421706	0.00928279	**
Topsoil	Zoopagomycota	pH	0.612099	1.76552e-05	***
Subsoil	Zoopagomycota	pH	0.341261	0.0560639
Topsoil	Chytridiomycota	pH	-0.293003	0.126302
Subsoil	Chytridiomycota	pH	-0.131412	0.570907
Topsoil	Aphelidiomycota	pH	-0.606033	2.0605e-05	***
Subsoil	Aphelidiomycota	pH	-0.131334	0.570907
Subsoil	Entorrhizomycota	pH	-0.179965	0.452541
Topsoil	Olpidiomycota	pH	0.0373537	0.880006
Subsoil	Olpidiomycota	pH	0.0362509	0.880006
Topsoil	Blastocladiomycota	pH	0.100059	0.717674
Subsoil	Blastocladiomycota	pH	0.148976	0.563342
Topsoil	Ascomycota	Moisture	0.741653	6.69342e-09	***
Subsoil	Ascomycota	Moisture	-0.065128	0.814633
Topsoil	Basidiomycota	Moisture	-0.591055	3.76098e-05	***
Subsoil	Basidiomycota	Moisture	-0.092655	0.74441
Topsoil	Mucoromycota	Moisture	-0.278048	0.160077
Subsoil	Mucoromycota	Moisture	-0.075756	0.774797
Topsoil	Cryptomycota	Moisture	-0.683299	4.09104e-07	***
Subsoil	Cryptomycota	Moisture	-0.363156	0.0357409	*
Topsoil	Zoopagomycota	Moisture	0.63924	4.90234e-06	***
Subsoil	Zoopagomycota	Moisture	0.206942	0.361717
Topsoil	Chytridiomycota	Moisture	-0.338635	0.0566899
Subsoil	Chytridiomycota	Moisture	-0.0820111	0.774797
Topsoil	Aphelidiomycota	Moisture	-0.504822	0.000916895	***
Subsoil	Aphelidiomycota	Moisture	-0.173395	0.452541
Subsoil	Entorrhizomycota	Moisture	-0.145282	0.563342
Topsoil	Olpidiomycota	Moisture	-0.00750513	0.96765
Subsoil	Olpidiomycota	Moisture	-0.0278373	0.901095
Topsoil	Blastocladiomycota	Moisture	0.0563846	0.827832
Subsoil	Blastocladiomycota	Moisture	0.144296	0.563342
Topsoil	Ascomycota	Density	-0.027344	0.901095
Subsoil	Ascomycota	Density	0.238663	0.269945
Topsoil	Basidiomycota	Density	0.175883	0.452541
Subsoil	Basidiomycota	Density	-0.226568	0.315049
Topsoil	Mucoromycota	Density	0.14697	0.563342
Subsoil	Mucoromycota	Density	-0.0583935	0.825649
Topsoil	Cryptomycota	Density	-0.141851	0.563342
Subsoil	Cryptomycota	Density	-0.108258	0.697213
Topsoil	Zoopagomycota	Density	-0.078182	0.774797
Subsoil	Zoopagomycota	Density	0.238761	0.269945
Topsoil	Chytridiomycota	Density	0.135852	0.563342
Subsoil	Chytridiomycota	Density	-0.0396755	0.880006
Topsoil	Aphelidiomycota	Density	-0.216742	0.332571
Subsoil	Aphelidiomycota	Density	0.0686174	0.802883
Subsoil	Entorrhizomycota	Density	-0.0795593	0.774797
Topsoil	Olpidiomycota	Density	0.0505329	0.843669
Subsoil	Olpidiomycota	Density	0.0796963	0.774797
Topsoil	Blastocladiomycota	Density	0.0602082	0.824726
Subsoil	Blastocladiomycota	Density	0.25881	0.215718
Supplementary Table S5d
Summary of Partial Mantel's test of the effect of soil physicochemical properties on each individual fungal phylum at different soil moisture conditions - drought (D) and rainfall-fed (RF)
Depth	Phylum	Soil_physicochemical_properties	r	p.value	p.value_significance
Drought	Ascomycota	TN	0.389743	0.0309559	*
Rainfall-fed	Ascomycota	TN	0.576348	0.000149512	***
Drought	Basidiomycota	TN	-0.362225	0.0372798	*
Rainfall-fed	Basidiomycota	TN	-0.530759	0.000683981	***
Drought	Mucoromycota	TN	0.0714346	0.735038
Rainfall-fed	Mucoromycota	TN	-0.302765	0.0923659
Drought	Cryptomycota	TN	0.0738775	0.735038
Rainfall-fed	Cryptomycota	TN	0.23216	0.235921
Drought	Zoopagomycota	TN	0.175709	0.38036
Rainfall-fed	Zoopagomycota	TN	0.37582	0.0309559	*
Drought	Chytridiomycota	TN	0.378859	0.0309559	*
Rainfall-fed	Chytridiomycota	TN	0.171237	0.38036
Drought	Aphelidiomycota	TN	0.206873	0.271554
Rainfall-fed	Aphelidiomycota	TN	0.0935097	0.676263
Rainfall-fed	Entorrhizomycota	TN	-0.266083	0.165882
Drought	Olpidiomycota	TN	0.21364	0.264744
Rainfall-fed	Olpidiomycota	TN	0.219	0.260427
Drought	Blastocladiomycota	TN	0.0228356	0.909356
Rainfall-fed	Blastocladiomycota	TN	-0.0735591	0.735038
Drought	Ascomycota	TOC	0.17269	0.38036
Rainfall-fed	Ascomycota	TOC	0.359274	0.0372798	*
Drought	Basidiomycota	TOC	-0.246852	0.197277
Rainfall-fed	Basidiomycota	TOC	-0.373559	0.0309559	*
Drought	Mucoromycota	TOC	0.102359	0.650945
Rainfall-fed	Mucoromycota	TOC	-0.199623	0.294366
Drought	Cryptomycota	TOC	0.354388	0.0398401	*
Rainfall-fed	Cryptomycota	TOC	0.526965	0.000683981	***
Drought	Zoopagomycota	TOC	-0.00952107	0.946956
Rainfall-fed	Zoopagomycota	TOC	0.0570477	0.803316
Drought	Chytridiomycota	TOC	0.360762	0.0372798	*
Rainfall-fed	Chytridiomycota	TOC	0.301579	0.0923659
Drought	Aphelidiomycota	TOC	0.342599	0.0496996	*
Rainfall-fed	Aphelidiomycota	TOC	0.380322	0.0309559	*
Rainfall-fed	Entorrhizomycota	TOC	-0.103331	0.650945
Drought	Olpidiomycota	TOC	0.159066	0.391122
Rainfall-fed	Olpidiomycota	TOC	0.207983	0.271554
Drought	Blastocladiomycota	TOC	0.0380195	0.860246
Rainfall-fed	Blastocladiomycota	TOC	-0.166179	0.388922
Drought	Ascomycota	pH	0.374422	0.0309559	*
Rainfall-fed	Ascomycota	pH	0.257777	0.177715
Drought	Basidiomycota	pH	-0.250786	0.190263
Rainfall-fed	Basidiomycota	pH	-0.225674	0.24749
Drought	Mucoromycota	pH	-0.0482597	0.837235
Rainfall-fed	Mucoromycota	pH	-0.174319	0.38036
Drought	Cryptomycota	pH	-0.643814	1.88837e-05	***
Rainfall-fed	Cryptomycota	pH	-0.492095	0.0021634	**
Drought	Zoopagomycota	pH	0.379797	0.0309559	*
Rainfall-fed	Zoopagomycota	pH	0.581733	0.000149512	***
Drought	Chytridiomycota	pH	-0.0895973	0.690686
Rainfall-fed	Chytridiomycota	pH	-0.256631	0.177715
Drought	Aphelidiomycota	pH	-0.339858	0.050593
Rainfall-fed	Aphelidiomycota	pH	-0.401088	0.0277064	*
Rainfall-fed	Entorrhizomycota	pH	-0.188606	0.334807
Drought	Olpidiomycota	pH	0.0809705	0.724526
Rainfall-fed	Olpidiomycota	pH	-0.0992228	0.650945
Drought	Blastocladiomycota	pH	0.0181769	0.916506
Rainfall-fed	Blastocladiomycota	pH	0.160873	0.391122
Drought	Ascomycota	Moisture	0.325458	0.0661438
Rainfall-fed	Ascomycota	Moisture	0.26139	0.174206
Drought	Basidiomycota	Moisture	-0.213157	0.264744
Rainfall-fed	Basidiomycota	Moisture	-0.239644	0.215498
Drought	Mucoromycota	Moisture	-0.100861	0.650945
Rainfall-fed	Mucoromycota	Moisture	-0.210817	0.267873
Drought	Cryptomycota	Moisture	-0.560899	0.000237679	***
Rainfall-fed	Cryptomycota	Moisture	-0.442094	0.0096971	**
Drought	Zoopagomycota	Moisture	0.307378	0.0905322
Rainfall-fed	Zoopagomycota	Moisture	0.587147	0.000149512	***
Drought	Chytridiomycota	Moisture	-0.128778	0.53155
Rainfall-fed	Chytridiomycota	Moisture	-0.229322	0.240131
Drought	Aphelidiomycota	Moisture	-0.30625	0.0905322
Rainfall-fed	Aphelidiomycota	Moisture	-0.387393	0.0309559	*
Rainfall-fed	Entorrhizomycota	Moisture	-0.164451	0.388922
Drought	Olpidiomycota	Moisture	0.0249843	0.906779
Rainfall-fed	Olpidiomycota	Moisture	-0.0714736	0.735038
Drought	Blastocladiomycota	Moisture	-0.0381969	0.860246
Rainfall-fed	Blastocladiomycota	Moisture	0.149777	0.428884
Drought	Ascomycota	Density	-0.0196209	0.916506
Rainfall-fed	Ascomycota	Density	-0.113593	0.610937
Drought	Basidiomycota	Density	-0.00936169	0.946956
Rainfall-fed	Basidiomycota	Density	0.0999125	0.650945
Drought	Mucoromycota	Density	0.0777749	0.734525
Rainfall-fed	Mucoromycota	Density	0.060096	0.794491
Drought	Cryptomycota	Density	-0.163774	0.388922
Rainfall-fed	Cryptomycota	Density	-0.172745	0.38036
Drought	Zoopagomycota	Density	0.163684	0.388922
Rainfall-fed	Zoopagomycota	Density	-0.159611	0.391122
Drought	Chytridiomycota	Density	0.0523124	0.822425
Rainfall-fed	Chytridiomycota	Density	-0.0389967	0.860246
Drought	Aphelidiomycota	Density	0.0302934	0.885432
Rainfall-fed	Aphelidiomycota	Density	-0.214263	0.264744
Rainfall-fed	Entorrhizomycota	Density	-0.0378619	0.860246
Drought	Olpidiomycota	Density	0.0856479	0.705352
Rainfall-fed	Olpidiomycota	Density	-0.222245	0.254224
Drought	Blastocladiomycota	Density	0.0338101	0.874504
Rainfall-fed	Blastocladiomycota	Density	0.284183	0.124073
