# Supplementary material
Source: Research Square preprint supplement (doi:10.21203/rs.3.rs-9052155/v1)
Supplement: Supplementary file 6 [file 6463fe13d2a4d14de3ba416c.xlsx]

## Sheet: S8a-b
Supplementary Table S8a
Summary of the expression of lignocellulose-degrading proteins from the carbohydrate-active enzyme database (CAZy) produced by fungi linked to the FUNGUILD database quantified by the number of peptides in these proteins and subsequently their relative presence under drought as compared to rainfall-fed conditions, represented by fold-change values
EC	Phylum	Class	Site	Protein_Description	CAZy	Lignocellulose	trophic_mode_funguild	guild_funguild	confidence_funguild	growth_form_funguild	CAZy_category	fold_change_peptides_drought_vs_rainfall	n_unique_peptides
1.1.3.13	Ascomycota	Dothideomycetes	Podzol	alcohol oxidase	AA3	Lignocellulose- associated H‚ÇÇO‚ÇÇ	Pathotroph	Plant Pathogen	Probable	NULL	AA	0.785714	1
1.1.3.13	Ascomycota	Eurotiomycetes	Podzol	alcohol oxidase	AA3	Lignocellulose- associated H‚ÇÇO‚ÇÇ	Pathotroph	Animal Pathogen	Probable	Microfungus	AA	0.785714	1
1.1.3.13	Ascomycota	Eurotiomycetes	Podzol	alcohol oxidase	AA3	Lignocellulose- associated H‚ÇÇO‚ÇÇ	Saprotroph	Undefined Saprotroph	Probable	Microfungus	AA	0.785714	1
1.1.3.13	Ascomycota	Sordariomycetes	Luvisol	alcohol oxidase	AA5	Lignocellulose- associated H‚ÇÇO‚ÇÇ	Pathotroph	Plant Pathogen	Probable	Microfungus	AA	1.1	1
1.1.3.13	Ascomycota	Sordariomycetes	Luvisol	alcohol oxidase	AA5	Lignocellulose- associated H‚ÇÇO‚ÇÇ	Pathotroph	Plant Pathogen	Probable	NULL	AA	1.1	1
1.1.3.13	Ascomycota	Sordariomycetes	Podzol	alcohol oxidase	AA5	Lignocellulose- associated H‚ÇÇO‚ÇÇ	Pathotroph	Plant Pathogen	Probable	NULL	AA	0.785714	2
1.1.3.38	Ascomycota	Eurotiomycetes	Luvisol	vanillyl-alcohol oxidase	AA4	Lignocellulose- associated H‚ÇÇO‚ÇÇ	Pathotroph	Animal Pathogen	Probable	NULL	AA	2	2
1.1.3.38	Ascomycota	Eurotiomycetes	Luvisol	vanillyl-alcohol oxidase	AA4	Lignocellulose- associated H‚ÇÇO‚ÇÇ	Pathotroph	Plant Pathogen	Probable	Facultative Yeast	AA	2	2
1.1.3.38	Ascomycota	Eurotiomycetes	Luvisol	vanillyl-alcohol oxidase	AA4	Lignocellulose- associated H‚ÇÇO‚ÇÇ	Pathotroph	Plant Pathogen	Probable	NULL	AA	2	2
1.1.3.38	Ascomycota	Eurotiomycetes	Luvisol	vanillyl-alcohol oxidase	AA4	Lignocellulose- associated H‚ÇÇO‚ÇÇ	Symbiotroph	Endophyte	Probable	NULL	AA	2	2
1.1.3.38	Ascomycota	Eurotiomycetes	Phaeozem	vanillyl-alcohol oxidase	AA4	Lignocellulose- associated H‚ÇÇO‚ÇÇ	Pathotroph	Animal Pathogen	Probable	NULL	AA	1.5	2
1.1.3.38	Ascomycota	Eurotiomycetes	Phaeozem	vanillyl-alcohol oxidase	AA4	Lignocellulose- associated H‚ÇÇO‚ÇÇ	Pathotroph	Plant Pathogen	Probable	Facultative Yeast	AA	1.5	2
1.1.3.38	Ascomycota	Eurotiomycetes	Phaeozem	vanillyl-alcohol oxidase	AA4	Lignocellulose- associated H‚ÇÇO‚ÇÇ	Pathotroph	Plant Pathogen	Probable	NULL	AA	1.5	2
1.1.3.38	Ascomycota	Eurotiomycetes	Phaeozem	vanillyl-alcohol oxidase	AA4	Lignocellulose- associated H‚ÇÇO‚ÇÇ	Symbiotroph	Endophyte	Probable	NULL	AA	1.5	2
1.1.3.4	Ascomycota	Eurotiomycetes	Luvisol	glucose oxidase	AA3	Lignocellulose- associated H‚ÇÇO‚ÇÇ	Pathotroph	Animal Pathogen	Probable	Microfungus	AA	0.875	37
1.1.3.4	Ascomycota	Eurotiomycetes	Luvisol	glucose oxidase	AA3	Lignocellulose- associated H‚ÇÇO‚ÇÇ	Pathotroph	Animal Pathogen	Probable	NULL	AA	0.875	37
1.1.3.4	Ascomycota	Eurotiomycetes	Luvisol	glucose oxidase	AA3	Lignocellulose- associated H‚ÇÇO‚ÇÇ	Pathotroph	Plant Pathogen	Probable	Facultative Yeast	AA	0.875	37
1.1.3.4	Ascomycota	Eurotiomycetes	Luvisol	glucose oxidase	AA3	Lignocellulose- associated H‚ÇÇO‚ÇÇ	Pathotroph	Plant Pathogen	Probable	NULL	AA	0.875	37
1.1.3.4	Ascomycota	Eurotiomycetes	Luvisol	glucose oxidase	AA3	Lignocellulose- associated H‚ÇÇO‚ÇÇ	Saprotroph	Undefined Saprotroph	Probable	Microfungus	AA	0.875	37
1.1.3.4	Ascomycota	Eurotiomycetes	Luvisol	glucose oxidase	AA3	Lignocellulose- associated H‚ÇÇO‚ÇÇ	Symbiotroph	Endophyte	Probable	NULL	AA	0.875	37
1.1.3.4	Ascomycota	Eurotiomycetes	Phaeozem	glucose oxidase	AA3	Lignocellulose- associated H‚ÇÇO‚ÇÇ	Pathotroph	Animal Pathogen	Probable	Microfungus	AA	1.35484	29
1.1.3.4	Ascomycota	Eurotiomycetes	Phaeozem	glucose oxidase	AA3	Lignocellulose- associated H‚ÇÇO‚ÇÇ	Pathotroph	Animal Pathogen	Probable	NULL	AA	1.35484	29
1.1.3.4	Ascomycota	Eurotiomycetes	Phaeozem	glucose oxidase	AA3	Lignocellulose- associated H‚ÇÇO‚ÇÇ	Pathotroph	Plant Pathogen	Probable	Facultative Yeast	AA	1.35484	29
1.1.3.4	Ascomycota	Eurotiomycetes	Phaeozem	glucose oxidase	AA3	Lignocellulose- associated H‚ÇÇO‚ÇÇ	Pathotroph	Plant Pathogen	Probable	NULL	AA	1.35484	29
1.1.3.4	Ascomycota	Eurotiomycetes	Phaeozem	glucose oxidase	AA3	Lignocellulose- associated H‚ÇÇO‚ÇÇ	Saprotroph	Undefined Saprotroph	Probable	Microfungus	AA	1.35484	29
1.1.3.4	Ascomycota	Eurotiomycetes	Phaeozem	glucose oxidase	AA3	Lignocellulose- associated H‚ÇÇO‚ÇÇ	Symbiotroph	Endophyte	Probable	NULL	AA	1.35484	29
1.1.3.4	Ascomycota	Eurotiomycetes	Podzol	glucose oxidase	AA3	Lignocellulose- associated H‚ÇÇO‚ÇÇ	Pathotroph	Animal Pathogen	Probable	Microfungus	AA	1.25	53
1.1.3.4	Ascomycota	Eurotiomycetes	Podzol	glucose oxidase	AA3	Lignocellulose- associated H‚ÇÇO‚ÇÇ	Pathotroph	Animal Pathogen	Probable	NULL	AA	1.25	53
1.1.3.4	Ascomycota	Eurotiomycetes	Podzol	glucose oxidase	AA3	Lignocellulose- associated H‚ÇÇO‚ÇÇ	Pathotroph	Plant Pathogen	Probable	Facultative Yeast	AA	1.25	53
1.1.3.4	Ascomycota	Eurotiomycetes	Podzol	glucose oxidase	AA3	Lignocellulose- associated H‚ÇÇO‚ÇÇ	Pathotroph	Plant Pathogen	Probable	NULL	AA	1.25	53
1.1.3.4	Ascomycota	Eurotiomycetes	Podzol	glucose oxidase	AA3	Lignocellulose- associated H‚ÇÇO‚ÇÇ	Saprotroph	Undefined Saprotroph	Probable	Microfungus	AA	1.25	53
1.1.3.4	Ascomycota	Eurotiomycetes	Podzol	glucose oxidase	AA3	Lignocellulose- associated H‚ÇÇO‚ÇÇ	Symbiotroph	Endophyte	Probable	NULL	AA	1.25	53
1.1.3.9	Ascomycota	Sordariomycetes	Luvisol	galactose oxidase	AA5	Lignocellulose- associated H‚ÇÇO‚ÇÇ	Pathotroph	Plant Pathogen	Probable	NULL	AA	0.6	2
1.1.3.9	Ascomycota	Sordariomycetes	Phaeozem	galactose oxidase	AA5	Lignocellulose- associated H‚ÇÇO‚ÇÇ	Pathotroph	Plant Pathogen	Probable	NULL	AA	0.545455	1
1.1.3.9	Ascomycota	Sordariomycetes	Podzol	galactose oxidase	AA5	Lignocellulose- associated H‚ÇÇO‚ÇÇ	Pathotroph	Plant Pathogen	Probable	NULL	AA	0.625	1
1.1.99.29	Basidiomycota	Agaricomycetes	Luvisol	pyranose:acceptor oxidoreductase	AA3	Lignocellulose- associated H‚ÇÇO‚ÇÇ	Saprotroph	Soil Saprotroph	Probable	Agaricoid	AA	1.19565	151
1.1.99.29	Basidiomycota	Agaricomycetes	Luvisol	pyranose:acceptor oxidoreductase	AA3	Lignocellulose- associated H‚ÇÇO‚ÇÇ	Saprotroph	Undefined Saprotroph	Probable	Agaricoid	AA	1.19565	151
1.1.99.29	Basidiomycota	Agaricomycetes	Phaeozem	pyranose:acceptor oxidoreductase	AA3	Lignocellulose- associated H‚ÇÇO‚ÇÇ	Saprotroph	Soil Saprotroph	Probable	Agaricoid	AA	1.14685	190
1.1.99.29	Basidiomycota	Agaricomycetes	Phaeozem	pyranose:acceptor oxidoreductase	AA3	Lignocellulose- associated H‚ÇÇO‚ÇÇ	Saprotroph	Undefined Saprotroph	Probable	Agaricoid	AA	1.14685	190
1.1.99.29	Basidiomycota	Agaricomycetes	Podzol	pyranose:acceptor oxidoreductase	AA3	Lignocellulose- associated H‚ÇÇO‚ÇÇ	Saprotroph	Soil Saprotroph	Probable	Agaricoid	AA	0.88961	185
1.1.99.29	Basidiomycota	Agaricomycetes	Podzol	pyranose:acceptor oxidoreductase	AA3	Lignocellulose- associated H‚ÇÇO‚ÇÇ	Saprotroph	Undefined Saprotroph	Probable	Agaricoid	AA	0.88961	185
1.10.3.2	Ascomycota	Eurotiomycetes	Luvisol	laccase	AA1	Lignin	Pathotroph	Animal Pathogen	Probable	Microfungus	AA	0.977273	5
1.10.3.2	Ascomycota	Eurotiomycetes	Luvisol	laccase	AA1	Lignin	Saprotroph	Undefined Saprotroph	Probable	Microfungus	AA	0.977273	5
1.10.3.2	Ascomycota	Eurotiomycetes	Phaeozem	laccase	AA1	Lignin	Pathotroph	Animal Pathogen	Probable	Microfungus	AA	1.01402	5
1.10.3.2	Ascomycota	Eurotiomycetes	Phaeozem	laccase	AA1	Lignin	Saprotroph	Undefined Saprotroph	Probable	Microfungus	AA	1.01402	5
1.10.3.2	Ascomycota	Eurotiomycetes	Podzol	laccase	AA1	Lignin	Pathotroph	Animal Pathogen	Probable	Microfungus	AA	1.23226	4
1.10.3.2	Ascomycota	Eurotiomycetes	Podzol	laccase	AA1	Lignin	Saprotroph	Undefined Saprotroph	Probable	Microfungus	AA	1.23226	4
1.10.3.2	Ascomycota	Leotiomycetes	Phaeozem	laccase	AA1	Lignin	Pathotroph	Plant Pathogen	Probable	Microfungus	AA	1.01402	3
1.10.3.2	Ascomycota	Leotiomycetes	Podzol	laccase	AA1	Lignin	Pathotroph	Plant Pathogen	Probable	Microfungus	AA	1.23226	2
1.10.3.2	Ascomycota	Sordariomycetes	Luvisol	laccase	AA1	Lignin	Pathotroph	Plant Pathogen	Probable	NULL	AA	0.977273	22
1.10.3.2	Ascomycota	Sordariomycetes	Phaeozem	laccase	AA1	Lignin	Pathotroph	Plant Pathogen	Probable	NULL	AA	1.01402	9
1.10.3.2	Ascomycota	Sordariomycetes	Podzol	laccase	AA1	Lignin	Pathotroph	Plant Pathogen	Probable	NULL	AA	1.23226	23
1.10.3.2	Basidiomycota	Agaricomycetes	Luvisol	laccase	AA1	Lignin	Saprotroph	Litter Saprotroph	Highly Probable	Agaricoid	AA	0.977273	54
1.10.3.2	Basidiomycota	Agaricomycetes	Luvisol	laccase	AA1	Lignin	Saprotroph	Undefined Saprotroph	Probable	NULL	AA	0.977273	54
1.10.3.2	Basidiomycota	Agaricomycetes	Phaeozem	laccase	AA1	Lignin	Saprotroph	Litter Saprotroph	Highly Probable	Agaricoid	AA	1.01402	51
1.10.3.2	Basidiomycota	Agaricomycetes	Phaeozem	laccase	AA1	Lignin	Saprotroph	Undefined Saprotroph	Probable	NULL	AA	1.01402	51
1.10.3.2	Basidiomycota	Agaricomycetes	Podzol	laccase	AA1	Lignin	Saprotroph	Litter Saprotroph	Highly Probable	Agaricoid	AA	1.23226	59
1.10.3.2	Basidiomycota	Agaricomycetes	Podzol	laccase	AA1	Lignin	Saprotroph	Undefined Saprotroph	Probable	NULL	AA	1.23226	59
1.14.99.56	Ascomycota	Eurotiomycetes	Luvisol	LPMO	AA9	Cellulose	Pathotroph	Animal Pathogen	Probable	Microfungus	AA	1.63551	9
1.14.99.56	Ascomycota	Eurotiomycetes	Luvisol	LPMO	AA9	Cellulose	Saprotroph	Undefined Saprotroph	Probable	Microfungus	AA	0.983146	9
1.14.99.56	Ascomycota	Eurotiomycetes	Phaeozem	LPMO	AA9	Cellulose	Pathotroph	Animal Pathogen	Probable	Microfungus	AA	1.07989	10
1.14.99.56	Ascomycota	Eurotiomycetes	Phaeozem	LPMO	AA9	Cellulose	Saprotroph	Undefined Saprotroph	Probable	Microfungus	AA	1.07989	10
1.14.99.56	Ascomycota	Eurotiomycetes	Podzol	LPMO	AA9	Cellulose	Pathotroph	Animal Pathogen	Probable	Microfungus	AA	1.24465	10
1.14.99.56	Ascomycota	Eurotiomycetes	Podzol	LPMO	AA9	Cellulose	Saprotroph	Undefined Saprotroph	Probable	Microfungus	AA	1.24465	10
1.14.99.56	Ascomycota	Sordariomycetes	Luvisol	LPMO	AA9	Cellulose	Pathotroph	Animal Pathogen	Probable	NULL	AA	1.63551	132
1.14.99.56	Ascomycota	Sordariomycetes	Luvisol	LPMO	AA9	Cellulose	Pathotroph	Endophyte-Fungal Parasite-Plant Pathogen	Probable	NULL	AA	1.63551	132
1.14.99.56	Ascomycota	Sordariomycetes	Luvisol	LPMO	AA9	Cellulose	Symbiotroph	Endophyte	Probable	NULL	AA	1.96078	132
1.14.99.56	Ascomycota	Sordariomycetes	Phaeozem	LPMO	AA9	Cellulose	Pathotroph	Animal Pathogen	Probable	NULL	AA	1.07989	113
1.14.99.56	Ascomycota	Sordariomycetes	Phaeozem	LPMO	AA9	Cellulose	Pathotroph	Endophyte-Fungal Parasite-Plant Pathogen	Probable	NULL	AA	1.07989	113
1.14.99.56	Ascomycota	Sordariomycetes	Phaeozem	LPMO	AA9	Cellulose	Symbiotroph	Endophyte	Probable	NULL	AA	1.07989	113
1.14.99.56	Ascomycota	Sordariomycetes	Podzol	LPMO	AA9	Cellulose	Pathotroph	Animal Pathogen	Probable	NULL	AA	1.24465	151
1.14.99.56	Ascomycota	Sordariomycetes	Podzol	LPMO	AA9	Cellulose	Pathotroph	Endophyte-Fungal Parasite-Plant Pathogen	Probable	NULL	AA	1.24465	151
1.14.99.56	Ascomycota	Sordariomycetes	Podzol	LPMO	AA9	Cellulose	Symbiotroph	Endophyte	Probable	NULL	AA	1.24465	151
3.1.1.72	Ascomycota	Eurotiomycetes	Phaeozem	acetylxylan/feruloyl esterase	CE1	Hemicellulose	Pathotroph	Animal Pathogen	Probable	Microfungus	CE	0.375	2
3.1.1.72	Ascomycota	Eurotiomycetes	Phaeozem	acetylxylan/feruloyl esterase	CE1	Hemicellulose	Pathotroph	Animal Pathogen	Probable	NULL	CE	0.375	2
3.1.1.72	Ascomycota	Eurotiomycetes	Phaeozem	acetylxylan/feruloyl esterase	CE1	Hemicellulose	Saprotroph	Undefined Saprotroph	Probable	Microfungus	CE	0.375	2
3.1.1.72	Ascomycota	Eurotiomycetes	Phaeozem	acetylxylan/feruloyl esterase	CE5	Hemicellulose	Pathotroph	Animal Pathogen	Probable	NULL	CE	0.375	2
3.1.1.73	Basidiomycota	Agaricomycetes	Luvisol	acetylxylan/feruloyl esterase	CE1	Hemicellulose	Saprotroph	Litter Saprotroph	Highly Probable	Agaricoid	CE	1.76344	2
3.1.1.73	Basidiomycota	Agaricomycetes	Luvisol	acetylxylan/feruloyl esterase	CE1	Hemicellulose	Saprotroph	Undefined Saprotroph	Probable	NULL	CE	1.76344	2
3.1.1.73	Basidiomycota	Agaricomycetes	Phaeozem	acetylxylan/feruloyl esterase	CE1	Hemicellulose	Saprotroph	Litter Saprotroph	Highly Probable	Agaricoid	CE	2	5
3.1.1.73	Basidiomycota	Agaricomycetes	Phaeozem	acetylxylan/feruloyl esterase	CE1	Hemicellulose	Saprotroph	Undefined Saprotroph	Probable	NULL	CE	2	5
3.1.1.73	Basidiomycota	Agaricomycetes	Podzol	acetylxylan/feruloyl esterase	CE1	Hemicellulose	Saprotroph	Litter Saprotroph	Highly Probable	Agaricoid	CE	1.69412	4
3.1.1.73	Basidiomycota	Agaricomycetes	Podzol	acetylxylan/feruloyl esterase	CE1	Hemicellulose	Saprotroph	Undefined Saprotroph	Probable	NULL	CE	1.69412	4
3.2.1.113	Ascomycota	Eurotiomycetes	Phaeozem	alpha-mannosidase	GH47	Starch	Pathotroph	Animal Pathogen	Probable	Microfungus	GH	0.75	2
3.2.1.113	Ascomycota	Eurotiomycetes	Phaeozem	alpha-mannosidase	GH47	Starch	Pathotroph	Animal Pathogen	Probable	NULL	GH	0.75	2
3.2.1.113	Ascomycota	Eurotiomycetes	Phaeozem	alpha-mannosidase	GH47	Starch	Pathotroph	Plant Pathogen	Probable	Facultative Yeast	GH	0.75	2
3.2.1.113	Ascomycota	Eurotiomycetes	Phaeozem	alpha-mannosidase	GH47	Starch	Pathotroph	Plant Pathogen	Probable	NULL	GH	0.75	2
3.2.1.113	Ascomycota	Eurotiomycetes	Phaeozem	alpha-mannosidase	GH47	Starch	Saprotroph	Undefined Saprotroph	Probable	Microfungus	GH	0.75	2
3.2.1.113	Ascomycota	Eurotiomycetes	Phaeozem	alpha-mannosidase	GH47	Starch	Symbiotroph	Endophyte	Probable	NULL	GH	0.75	2
3.2.1.113	Ascomycota	Sordariomycetes	Luvisol	alpha-mannosidase	GH47	Starch	Pathotroph	Animal Pathogen	Probable	NULL	GH	1.75	1
3.2.1.113	Ascomycota	Sordariomycetes	Luvisol	alpha-mannosidase	GH47	Starch	Pathotroph	Endophyte-Fungal Parasite-Plant Pathogen	Probable	NULL	GH	1.75	1
3.2.1.113	Ascomycota	Sordariomycetes	Luvisol	alpha-mannosidase	GH47	Starch	Symbiotroph	Endophyte	Probable	NULL	GH	1.75	1
3.2.1.113	Ascomycota	Sordariomycetes	Phaeozem	alpha-mannosidase	GH47	Starch	Pathotroph	Animal Pathogen	Probable	NULL	GH	0.75	1
3.2.1.113	Ascomycota	Sordariomycetes	Phaeozem	alpha-mannosidase	GH47	Starch	Pathotroph	Endophyte-Fungal Parasite-Plant Pathogen	Probable	NULL	GH	0.75	1
3.2.1.113	Ascomycota	Sordariomycetes	Phaeozem	alpha-mannosidase	GH47	Starch	Symbiotroph	Endophyte	Probable	NULL	GH	0.75	1
3.2.1.113	Ascomycota	Sordariomycetes	Podzol	alpha-mannosidase	GH47	Starch	Pathotroph	Animal Pathogen	Probable	NULL	GH	0.583333	4
3.2.1.113	Ascomycota	Sordariomycetes	Podzol	alpha-mannosidase	GH47	Starch	Pathotroph	Endophyte-Fungal Parasite-Plant Pathogen	Probable	NULL	GH	0.583333	4
3.2.1.113	Ascomycota	Sordariomycetes	Podzol	alpha-mannosidase	GH47	Starch	Symbiotroph	Endophyte	Probable	NULL	GH	0.583333	4
3.2.1.15	Ascomycota	Dothideomycetes	Luvisol	endo-polygalacturonase	GH28	Pectin	Pathotroph	Plant Pathogen	Probable	Microfungus	GH	0.877358	24
3.2.1.15	Ascomycota	Dothideomycetes	Luvisol	endo-polygalacturonase	GH28	Pectin	Pathotroph	Plant Pathogen	Probable	NULL	GH	0.877358	24
3.2.1.15	Ascomycota	Dothideomycetes	Phaeozem	endo-polygalacturonase	GH28	Pectin	Pathotroph	Plant Pathogen	Probable	Microfungus	GH	1.05344	4
3.2.1.15	Ascomycota	Dothideomycetes	Phaeozem	endo-polygalacturonase	GH28	Pectin	Pathotroph	Plant Pathogen	Probable	NULL	GH	1.05344	4
3.2.1.15	Ascomycota	Dothideomycetes	Podzol	endo-polygalacturonase	GH28	Pectin	Pathotroph	Plant Pathogen	Probable	Microfungus	GH	1.12745	18
3.2.1.15	Ascomycota	Dothideomycetes	Podzol	endo-polygalacturonase	GH28	Pectin	Pathotroph	Plant Pathogen	Probable	NULL	GH	1.12745	18
3.2.1.15	Ascomycota	Eurotiomycetes	Luvisol	endo-polygalacturonase	CE8	Pectin	Pathotroph	Animal Pathogen	Probable	NULL	CE	0.877358	12
3.2.1.15	Ascomycota	Eurotiomycetes	Luvisol	endo-polygalacturonase	CE8	Pectin	Pathotroph	Plant Pathogen	Probable	Facultative Yeast	CE	0.877358	12
3.2.1.15	Ascomycota	Eurotiomycetes	Luvisol	endo-polygalacturonase	CE8	Pectin	Pathotroph	Plant Pathogen	Probable	NULL	CE	0.877358	12
3.2.1.15	Ascomycota	Eurotiomycetes	Luvisol	endo-polygalacturonase	CE8	Pectin	Symbiotroph	Endophyte	Probable	NULL	CE	0.877358	12
3.2.1.15	Ascomycota	Eurotiomycetes	Luvisol	endo-polygalacturonase	GH28	Pectin	Pathotroph	Animal Pathogen	Probable	Microfungus	GH	0.877358	12
3.2.1.15	Ascomycota	Eurotiomycetes	Luvisol	endo-polygalacturonase	GH28	Pectin	Pathotroph	Animal Pathogen	Probable	NULL	GH	0.877358	12
3.2.1.15	Ascomycota	Eurotiomycetes	Luvisol	endo-polygalacturonase	GH28	Pectin	Pathotroph	Plant Pathogen	Probable	Facultative Yeast	GH	0.877358	12
3.2.1.15	Ascomycota	Eurotiomycetes	Luvisol	endo-polygalacturonase	GH28	Pectin	Pathotroph	Plant Pathogen	Probable	NULL	GH	0.877358	12
3.2.1.15	Ascomycota	Eurotiomycetes	Luvisol	endo-polygalacturonase	GH28	Pectin	Saprotroph	Undefined Saprotroph	Probable	Microfungus	GH	0.877358	12
3.2.1.15	Ascomycota	Eurotiomycetes	Luvisol	endo-polygalacturonase	GH28	Pectin	Symbiotroph	Endophyte	Probable	NULL	GH	0.877358	12
3.2.1.15	Ascomycota	Eurotiomycetes	Phaeozem	endo-polygalacturonase	CE8	Pectin	Pathotroph	Animal Pathogen	Probable	NULL	CE	1.05344	13
3.2.1.15	Ascomycota	Eurotiomycetes	Phaeozem	endo-polygalacturonase	CE8	Pectin	Pathotroph	Plant Pathogen	Probable	Facultative Yeast	CE	1.05344	13
3.2.1.15	Ascomycota	Eurotiomycetes	Phaeozem	endo-polygalacturonase	CE8	Pectin	Pathotroph	Plant Pathogen	Probable	NULL	CE	1.05344	13
3.2.1.15	Ascomycota	Eurotiomycetes	Phaeozem	endo-polygalacturonase	CE8	Pectin	Symbiotroph	Endophyte	Probable	NULL	CE	1.05344	13
3.2.1.15	Ascomycota	Eurotiomycetes	Phaeozem	endo-polygalacturonase	GH28	Pectin	Pathotroph	Animal Pathogen	Probable	Microfungus	GH	1.05344	13
3.2.1.15	Ascomycota	Eurotiomycetes	Phaeozem	endo-polygalacturonase	GH28	Pectin	Pathotroph	Animal Pathogen	Probable	NULL	GH	1.05344	13
3.2.1.15	Ascomycota	Eurotiomycetes	Phaeozem	endo-polygalacturonase	GH28	Pectin	Pathotroph	Plant Pathogen	Probable	Facultative Yeast	GH	1.05344	13
3.2.1.15	Ascomycota	Eurotiomycetes	Phaeozem	endo-polygalacturonase	GH28	Pectin	Pathotroph	Plant Pathogen	Probable	NULL	GH	1.05344	13
3.2.1.15	Ascomycota	Eurotiomycetes	Phaeozem	endo-polygalacturonase	GH28	Pectin	Saprotroph	Undefined Saprotroph	Probable	Microfungus	GH	1.05344	13
3.2.1.15	Ascomycota	Eurotiomycetes	Phaeozem	endo-polygalacturonase	GH28	Pectin	Symbiotroph	Endophyte	Probable	NULL	GH	1.05344	13
3.2.1.15	Ascomycota	Eurotiomycetes	Podzol	endo-polygalacturonase	CE8	Pectin	Pathotroph	Animal Pathogen	Probable	NULL	CE	1.12745	12
3.2.1.15	Ascomycota	Eurotiomycetes	Podzol	endo-polygalacturonase	CE8	Pectin	Pathotroph	Plant Pathogen	Probable	Facultative Yeast	CE	1.12745	12
3.2.1.15	Ascomycota	Eurotiomycetes	Podzol	endo-polygalacturonase	CE8	Pectin	Pathotroph	Plant Pathogen	Probable	NULL	CE	1.12745	12
3.2.1.15	Ascomycota	Eurotiomycetes	Podzol	endo-polygalacturonase	CE8	Pectin	Symbiotroph	Endophyte	Probable	NULL	CE	1.12745	12
3.2.1.15	Ascomycota	Eurotiomycetes	Podzol	endo-polygalacturonase	GH28	Pectin	Pathotroph	Animal Pathogen	Probable	Microfungus	GH	1.12745	12
3.2.1.15	Ascomycota	Eurotiomycetes	Podzol	endo-polygalacturonase	GH28	Pectin	Pathotroph	Animal Pathogen	Probable	NULL	GH	1.12745	12
3.2.1.15	Ascomycota	Eurotiomycetes	Podzol	endo-polygalacturonase	GH28	Pectin	Pathotroph	Plant Pathogen	Probable	Facultative Yeast	GH	1.12745	12
3.2.1.15	Ascomycota	Eurotiomycetes	Podzol	endo-polygalacturonase	GH28	Pectin	Pathotroph	Plant Pathogen	Probable	NULL	GH	1.12745	12
3.2.1.15	Ascomycota	Eurotiomycetes	Podzol	endo-polygalacturonase	GH28	Pectin	Saprotroph	Undefined Saprotroph	Probable	Microfungus	GH	1.12745	12
3.2.1.15	Ascomycota	Eurotiomycetes	Podzol	endo-polygalacturonase	GH28	Pectin	Symbiotroph	Endophyte	Probable	NULL	GH	1.12745	12
3.2.1.15	Ascomycota	Leotiomycetes	Phaeozem	endo-polygalacturonase	GH28	Pectin	Pathotroph	Plant Pathogen	Probable	Microfungus	GH	1.05344	5
3.2.1.15	Ascomycota	Leotiomycetes	Podzol	endo-polygalacturonase	GH28	Pectin	Pathotroph	Plant Pathogen	Probable	Microfungus	GH	1.12745	3
3.2.1.15	Ascomycota	Sordariomycetes	Luvisol	endo-polygalacturonase	GH28	Pectin	Pathotroph	Animal Pathogen	Probable	NULL	GH	0.877358	12
3.2.1.15	Ascomycota	Sordariomycetes	Luvisol	endo-polygalacturonase	GH28	Pectin	Pathotroph	Endophyte-Fungal Parasite-Plant Pathogen	Probable	NULL	GH	0.877358	12
3.2.1.15	Ascomycota	Sordariomycetes	Luvisol	endo-polygalacturonase	GH28	Pectin	Pathotroph	Plant Pathogen	Probable	Microfungus	GH	0.877358	12
3.2.1.15	Ascomycota	Sordariomycetes	Luvisol	endo-polygalacturonase	GH28	Pectin	Pathotroph	Plant Pathogen	Probable	NULL	GH	0.877358	12
3.2.1.15	Ascomycota	Sordariomycetes	Luvisol	endo-polygalacturonase	GH28	Pectin	Symbiotroph	Endophyte	Probable	NULL	GH	0.877358	12
3.2.1.15	Ascomycota	Sordariomycetes	Luvisol	endo-polygalacturonase	GH28	Pectin	Symbiotroph	Plant Pathogen	Probable	Ergot	GH	0.877358	12
3.2.1.15	Ascomycota	Sordariomycetes	Phaeozem	endo-polygalacturonase	GH28	Pectin	Pathotroph	Animal Pathogen	Probable	NULL	GH	1.05344	6
3.2.1.15	Ascomycota	Sordariomycetes	Phaeozem	endo-polygalacturonase	GH28	Pectin	Pathotroph	Endophyte-Fungal Parasite-Plant Pathogen	Probable	NULL	GH	1.05344	6
3.2.1.15	Ascomycota	Sordariomycetes	Phaeozem	endo-polygalacturonase	GH28	Pectin	Pathotroph	Plant Pathogen	Probable	NULL	GH	1.05344	6
3.2.1.15	Ascomycota	Sordariomycetes	Phaeozem	endo-polygalacturonase	GH28	Pectin	Symbiotroph	Endophyte	Probable	NULL	GH	1.05344	6
3.2.1.15	Ascomycota	Sordariomycetes	Phaeozem	endo-polygalacturonase	GH28	Pectin	Symbiotroph	Plant Pathogen	Probable	Ergot	GH	1.05344	6
3.2.1.15	Ascomycota	Sordariomycetes	Podzol	endo-polygalacturonase	GH28	Pectin	Pathotroph	Animal Pathogen	Probable	NULL	GH	1.12745	11
3.2.1.15	Ascomycota	Sordariomycetes	Podzol	endo-polygalacturonase	GH28	Pectin	Pathotroph	Endophyte-Fungal Parasite-Plant Pathogen	Probable	NULL	GH	1.12745	11
3.2.1.15	Ascomycota	Sordariomycetes	Podzol	endo-polygalacturonase	GH28	Pectin	Pathotroph	Plant Pathogen	Probable	NULL	GH	1.12745	11
3.2.1.15	Ascomycota	Sordariomycetes	Podzol	endo-polygalacturonase	GH28	Pectin	Symbiotroph	Endophyte	Probable	NULL	GH	1.12745	11
3.2.1.150	Ascomycota	Eurotiomycetes	Phaeozem	cellobiohydrolase	GH74	Cellulose	Pathotroph	Animal Pathogen	Probable	Microfungus	GH	1	1
3.2.1.150	Ascomycota	Eurotiomycetes	Phaeozem	cellobiohydrolase	GH74	Cellulose	Saprotroph	Undefined Saprotroph	Probable	Microfungus	GH	1	1
3.2.1.151	Ascomycota	Eurotiomycetes	Phaeozem	endo-glucanase	GH12	Cellulose	Pathotroph	Animal Pathogen	Probable	Microfungus	GH	0.0241588	5
3.2.1.151	Ascomycota	Eurotiomycetes	Phaeozem	endo-glucanase	GH12	Cellulose	Pathotroph	Animal Pathogen	Probable	NULL	GH	0.0241588	5
3.2.1.151	Ascomycota	Eurotiomycetes	Phaeozem	endo-glucanase	GH12	Cellulose	Pathotroph	Plant Pathogen	Probable	Facultative Yeast	GH	0.0241588	5
3.2.1.151	Ascomycota	Eurotiomycetes	Phaeozem	endo-glucanase	GH12	Cellulose	Pathotroph	Plant Pathogen	Probable	NULL	GH	0.0241588	5
3.2.1.151	Ascomycota	Eurotiomycetes	Phaeozem	endo-glucanase	GH12	Cellulose	Saprotroph	Undefined Saprotroph	Probable	Microfungus	GH	0.0275387	5
3.2.1.151	Ascomycota	Eurotiomycetes	Phaeozem	endo-glucanase	GH12	Cellulose	Symbiotroph	Endophyte	Probable	NULL	GH	0.0230282	5
3.2.1.151	Ascomycota	Eurotiomycetes	Phaeozem	endo-glucanase	GH74	Cellulose	Pathotroph	Animal Pathogen	Probable	Microfungus	GH	1.33333	5
3.2.1.151	Ascomycota	Eurotiomycetes	Phaeozem	endo-glucanase	GH74	Cellulose	Saprotroph	Undefined Saprotroph	Probable	Microfungus	GH	1.33333	5
3.2.1.151	Ascomycota	Eurotiomycetes	Podzol	endo-glucanase	GH12	Cellulose	Pathotroph	Animal Pathogen	Probable	Microfungus	GH	0.0244044	3
3.2.1.151	Ascomycota	Eurotiomycetes	Podzol	endo-glucanase	GH12	Cellulose	Pathotroph	Animal Pathogen	Probable	NULL	GH	0.0244044	3
3.2.1.151	Ascomycota	Eurotiomycetes	Podzol	endo-glucanase	GH12	Cellulose	Pathotroph	Plant Pathogen	Probable	Facultative Yeast	GH	0.0244044	3
3.2.1.151	Ascomycota	Eurotiomycetes	Podzol	endo-glucanase	GH12	Cellulose	Pathotroph	Plant Pathogen	Probable	NULL	GH	0.0244044	3
3.2.1.151	Ascomycota	Eurotiomycetes	Podzol	endo-glucanase	GH12	Cellulose	Saprotroph	Undefined Saprotroph	Probable	Microfungus	GH	0.0278422	3
3.2.1.151	Ascomycota	Eurotiomycetes	Podzol	endo-glucanase	GH12	Cellulose	Symbiotroph	Endophyte	Probable	NULL	GH	0.0232558	3
3.2.1.151	Ascomycota	Eurotiomycetes	Podzol	endo-glucanase	GH74	Cellulose	Pathotroph	Animal Pathogen	Probable	Microfungus	GH	2	3
3.2.1.151	Ascomycota	Eurotiomycetes	Podzol	endo-glucanase	GH74	Cellulose	Saprotroph	Undefined Saprotroph	Probable	Microfungus	GH	2	3
3.2.1.20	Ascomycota	Eurotiomycetes	Luvisol	alpha-glucosidase	GH13	Starch	Pathotroph	Animal Pathogen	Probable	Microfungus	GH	1.02679	39
3.2.1.20	Ascomycota	Eurotiomycetes	Luvisol	alpha-glucosidase	GH13	Starch	Saprotroph	Undefined Saprotroph	Probable	Microfungus	GH	1.02679	39
3.2.1.20	Ascomycota	Eurotiomycetes	Luvisol	alpha-glucosidase	GH31	Starch	Pathotroph	Animal Pathogen	Probable	Microfungus	GH	1.02679	39
3.2.1.20	Ascomycota	Eurotiomycetes	Luvisol	alpha-glucosidase	GH31	Starch	Saprotroph	Undefined Saprotroph	Probable	Microfungus	GH	1.02679	39
3.2.1.20	Ascomycota	Eurotiomycetes	Phaeozem	alpha-glucosidase	GH13	Starch	Pathotroph	Animal Pathogen	Probable	Microfungus	GH	1.04961	37
3.2.1.20	Ascomycota	Eurotiomycetes	Phaeozem	alpha-glucosidase	GH13	Starch	Saprotroph	Undefined Saprotroph	Probable	Microfungus	GH	1.04961	37
3.2.1.20	Ascomycota	Eurotiomycetes	Phaeozem	alpha-glucosidase	GH31	Starch	Pathotroph	Animal Pathogen	Probable	Microfungus	GH	1.04961	37
3.2.1.20	Ascomycota	Eurotiomycetes	Phaeozem	alpha-glucosidase	GH31	Starch	Saprotroph	Undefined Saprotroph	Probable	Microfungus	GH	1.04961	37
3.2.1.20	Ascomycota	Eurotiomycetes	Podzol	alpha-glucosidase	GH13	Starch	Pathotroph	Animal Pathogen	Probable	Microfungus	GH	1.06509	60
3.2.1.20	Ascomycota	Eurotiomycetes	Podzol	alpha-glucosidase	GH13	Starch	Saprotroph	Undefined Saprotroph	Probable	Microfungus	GH	1.06509	60
3.2.1.20	Ascomycota	Eurotiomycetes	Podzol	alpha-glucosidase	GH31	Starch	Pathotroph	Animal Pathogen	Probable	Microfungus	GH	1.06509	60
3.2.1.20	Ascomycota	Eurotiomycetes	Podzol	alpha-glucosidase	GH31	Starch	Saprotroph	Undefined Saprotroph	Probable	Microfungus	GH	1.06509	60
3.2.1.21	Ascomycota	Eurotiomycetes	Luvisol	beta-glucosidase	GH1	Cellulose	Pathotroph	Animal Pathogen	Probable	Microfungus	GH	0.984533	180
3.2.1.21	Ascomycota	Eurotiomycetes	Luvisol	beta-glucosidase	GH1	Cellulose	Pathotroph	Animal Pathogen	Probable	NULL	GH	0.984533	180
3.2.1.21	Ascomycota	Eurotiomycetes	Luvisol	beta-glucosidase	GH1	Cellulose	Pathotroph	Plant Pathogen	Probable	Facultative Yeast	GH	0.984533	180
3.2.1.21	Ascomycota	Eurotiomycetes	Luvisol	beta-glucosidase	GH1	Cellulose	Pathotroph	Plant Pathogen	Probable	NULL	GH	0.984533	180
3.2.1.21	Ascomycota	Eurotiomycetes	Luvisol	beta-glucosidase	GH1	Cellulose	Saprotroph	Undefined Saprotroph	Probable	Microfungus	GH	0.984533	180
3.2.1.21	Ascomycota	Eurotiomycetes	Luvisol	beta-glucosidase	GH1	Cellulose	Symbiotroph	Endophyte	Probable	NULL	GH	0.984533	180
3.2.1.21	Ascomycota	Eurotiomycetes	Luvisol	beta-glucosidase	GH3	Cellulose	Pathotroph	Animal Pathogen	Probable	Microfungus	GH	0.984533	180
3.2.1.21	Ascomycota	Eurotiomycetes	Luvisol	beta-glucosidase	GH3	Cellulose	Pathotroph	Animal Pathogen	Probable	NULL	GH	0.984533	180
3.2.1.21	Ascomycota	Eurotiomycetes	Luvisol	beta-glucosidase	GH3	Cellulose	Pathotroph	Plant Pathogen	Probable	Facultative Yeast	GH	0.984533	180
3.2.1.21	Ascomycota	Eurotiomycetes	Luvisol	beta-glucosidase	GH3	Cellulose	Pathotroph	Plant Pathogen	Probable	NULL	GH	0.984533	180
3.2.1.21	Ascomycota	Eurotiomycetes	Luvisol	beta-glucosidase	GH3	Cellulose	Saprotroph	Undefined Saprotroph	Probable	Microfungus	GH	0.984533	180
3.2.1.21	Ascomycota	Eurotiomycetes	Luvisol	beta-glucosidase	GH3	Cellulose	Symbiotroph	Endophyte	Probable	NULL	GH	0.984533	180
3.2.1.21	Ascomycota	Eurotiomycetes	Phaeozem	beta-glucosidase	GH1	Cellulose	Pathotroph	Animal Pathogen	Probable	Microfungus	GH	1.05591	136
3.2.1.21	Ascomycota	Eurotiomycetes	Phaeozem	beta-glucosidase	GH1	Cellulose	Pathotroph	Animal Pathogen	Probable	NULL	GH	1.05591	136
3.2.1.21	Ascomycota	Eurotiomycetes	Phaeozem	beta-glucosidase	GH1	Cellulose	Pathotroph	Plant Pathogen	Probable	Facultative Yeast	GH	1.05591	136
3.2.1.21	Ascomycota	Eurotiomycetes	Phaeozem	beta-glucosidase	GH1	Cellulose	Pathotroph	Plant Pathogen	Probable	NULL	GH	1.05591	136
3.2.1.21	Ascomycota	Eurotiomycetes	Phaeozem	beta-glucosidase	GH1	Cellulose	Saprotroph	Undefined Saprotroph	Probable	Microfungus	GH	1.05591	136
3.2.1.21	Ascomycota	Eurotiomycetes	Phaeozem	beta-glucosidase	GH1	Cellulose	Symbiotroph	Endophyte	Probable	NULL	GH	1.05591	136
3.2.1.21	Ascomycota	Eurotiomycetes	Phaeozem	beta-glucosidase	GH3	Cellulose	Pathotroph	Animal Pathogen	Probable	Microfungus	GH	1.05591	136
3.2.1.21	Ascomycota	Eurotiomycetes	Phaeozem	beta-glucosidase	GH3	Cellulose	Pathotroph	Animal Pathogen	Probable	NULL	GH	1.05591	136
3.2.1.21	Ascomycota	Eurotiomycetes	Phaeozem	beta-glucosidase	GH3	Cellulose	Pathotroph	Plant Pathogen	Probable	Facultative Yeast	GH	1.05591	136
3.2.1.21	Ascomycota	Eurotiomycetes	Phaeozem	beta-glucosidase	GH3	Cellulose	Pathotroph	Plant Pathogen	Probable	NULL	GH	1.05591	136
3.2.1.21	Ascomycota	Eurotiomycetes	Phaeozem	beta-glucosidase	GH3	Cellulose	Saprotroph	Undefined Saprotroph	Probable	Microfungus	GH	1.05591	136
3.2.1.21	Ascomycota	Eurotiomycetes	Phaeozem	beta-glucosidase	GH3	Cellulose	Symbiotroph	Endophyte	Probable	NULL	GH	1.05591	136
3.2.1.21	Ascomycota	Eurotiomycetes	Podzol	beta-glucosidase	GH1	Cellulose	Pathotroph	Animal Pathogen	Probable	Microfungus	GH	1.03185	204
3.2.1.21	Ascomycota	Eurotiomycetes	Podzol	beta-glucosidase	GH1	Cellulose	Pathotroph	Animal Pathogen	Probable	NULL	GH	1.03185	204
3.2.1.21	Ascomycota	Eurotiomycetes	Podzol	beta-glucosidase	GH1	Cellulose	Pathotroph	Plant Pathogen	Probable	Facultative Yeast	GH	1.03185	204
3.2.1.21	Ascomycota	Eurotiomycetes	Podzol	beta-glucosidase	GH1	Cellulose	Pathotroph	Plant Pathogen	Probable	NULL	GH	1.03185	204
3.2.1.21	Ascomycota	Eurotiomycetes	Podzol	beta-glucosidase	GH1	Cellulose	Saprotroph	Undefined Saprotroph	Probable	Microfungus	GH	1.03185	204
3.2.1.21	Ascomycota	Eurotiomycetes	Podzol	beta-glucosidase	GH1	Cellulose	Symbiotroph	Endophyte	Probable	NULL	GH	1.03185	204
3.2.1.21	Ascomycota	Eurotiomycetes	Podzol	beta-glucosidase	GH3	Cellulose	Pathotroph	Animal Pathogen	Probable	Microfungus	GH	1.03185	204
3.2.1.21	Ascomycota	Eurotiomycetes	Podzol	beta-glucosidase	GH3	Cellulose	Pathotroph	Animal Pathogen	Probable	NULL	GH	1.03185	204
3.2.1.21	Ascomycota	Eurotiomycetes	Podzol	beta-glucosidase	GH3	Cellulose	Pathotroph	Plant Pathogen	Probable	Facultative Yeast	GH	1.03185	204
3.2.1.21	Ascomycota	Eurotiomycetes	Podzol	beta-glucosidase	GH3	Cellulose	Pathotroph	Plant Pathogen	Probable	NULL	GH	1.03185	204
3.2.1.21	Ascomycota	Eurotiomycetes	Podzol	beta-glucosidase	GH3	Cellulose	Saprotroph	Undefined Saprotroph	Probable	Microfungus	GH	1.03185	204
3.2.1.21	Ascomycota	Eurotiomycetes	Podzol	beta-glucosidase	GH3	Cellulose	Symbiotroph	Endophyte	Probable	NULL	GH	1.03185	204
3.2.1.21	Ascomycota	Leotiomycetes	Phaeozem	beta-glucosidase	GH3	Cellulose	Pathotroph	Plant Pathogen	Probable	Microfungus	GH	1.05591	48
3.2.1.21	Ascomycota	Leotiomycetes	Podzol	beta-glucosidase	GH3	Cellulose	Pathotroph	Plant Pathogen	Probable	Microfungus	GH	1.03185	71
3.2.1.21	Ascomycota	Pichiomycetes	Luvisol	beta-glucosidase	GH3	Cellulose	Pathotroph	Animal Pathogen	Probable	NULL	GH	0.984533	21
3.2.1.21	Ascomycota	Sordariomycetes	Luvisol	beta-glucosidase	GH1	Cellulose	Pathotroph	Animal Pathogen	Probable	NULL	GH	0.984533	358
3.2.1.21	Ascomycota	Sordariomycetes	Luvisol	beta-glucosidase	GH1	Cellulose	Pathotroph	Endophyte-Fungal Parasite-Plant Pathogen	Probable	NULL	GH	0.984533	358
3.2.1.21	Ascomycota	Sordariomycetes	Luvisol	beta-glucosidase	GH1	Cellulose	Pathotroph	Plant Pathogen	Probable	NULL	GH	0.984533	358
3.2.1.21	Ascomycota	Sordariomycetes	Luvisol	beta-glucosidase	GH1	Cellulose	Symbiotroph	Endophyte	Probable	NULL	GH	0.984533	358
3.2.1.21	Ascomycota	Sordariomycetes	Luvisol	beta-glucosidase	GH3	Cellulose	Pathotroph	Animal Pathogen	Probable	NULL	GH	0.984533	358
3.2.1.21	Ascomycota	Sordariomycetes	Luvisol	beta-glucosidase	GH3	Cellulose	Pathotroph	Endophyte-Fungal Parasite-Plant Pathogen	Probable	NULL	GH	0.984533	358
3.2.1.21	Ascomycota	Sordariomycetes	Luvisol	beta-glucosidase	GH3	Cellulose	Pathotroph	Plant Pathogen	Probable	NULL	GH	0.984533	358
3.2.1.21	Ascomycota	Sordariomycetes	Luvisol	beta-glucosidase	GH3	Cellulose	Symbiotroph	Endophyte	Probable	NULL	GH	0.984533	358
3.2.1.21	Ascomycota	Sordariomycetes	Phaeozem	beta-glucosidase	GH1	Cellulose	Pathotroph	Animal Pathogen	Probable	NULL	GH	1.05591	305
3.2.1.21	Ascomycota	Sordariomycetes	Phaeozem	beta-glucosidase	GH1	Cellulose	Pathotroph	Endophyte-Fungal Parasite-Plant Pathogen	Probable	NULL	GH	1.05591	305
3.2.1.21	Ascomycota	Sordariomycetes	Phaeozem	beta-glucosidase	GH1	Cellulose	Pathotroph	Plant Pathogen	Probable	NULL	GH	1.05591	305
3.2.1.21	Ascomycota	Sordariomycetes	Phaeozem	beta-glucosidase	GH1	Cellulose	Symbiotroph	Endophyte	Probable	NULL	GH	1.05591	305
3.2.1.21	Ascomycota	Sordariomycetes	Phaeozem	beta-glucosidase	GH3	Cellulose	Pathotroph	Animal Pathogen	Probable	NULL	GH	1.05591	305
3.2.1.21	Ascomycota	Sordariomycetes	Phaeozem	beta-glucosidase	GH3	Cellulose	Pathotroph	Endophyte-Fungal Parasite-Plant Pathogen	Probable	NULL	GH	1.05591	305
3.2.1.21	Ascomycota	Sordariomycetes	Phaeozem	beta-glucosidase	GH3	Cellulose	Pathotroph	Plant Pathogen	Probable	NULL	GH	1.05591	305
3.2.1.21	Ascomycota	Sordariomycetes	Phaeozem	beta-glucosidase	GH3	Cellulose	Symbiotroph	Endophyte	Probable	NULL	GH	1.05591	305
3.2.1.21	Ascomycota	Sordariomycetes	Podzol	beta-glucosidase	GH1	Cellulose	Pathotroph	Animal Pathogen	Probable	NULL	GH	1.03185	423
3.2.1.21	Ascomycota	Sordariomycetes	Podzol	beta-glucosidase	GH1	Cellulose	Pathotroph	Endophyte-Fungal Parasite-Plant Pathogen	Probable	NULL	GH	1.03185	423
3.2.1.21	Ascomycota	Sordariomycetes	Podzol	beta-glucosidase	GH1	Cellulose	Pathotroph	Plant Pathogen	Probable	NULL	GH	1.03185	423
3.2.1.21	Ascomycota	Sordariomycetes	Podzol	beta-glucosidase	GH1	Cellulose	Symbiotroph	Endophyte	Probable	NULL	GH	1.03185	423
3.2.1.21	Ascomycota	Sordariomycetes	Podzol	beta-glucosidase	GH3	Cellulose	Pathotroph	Animal Pathogen	Probable	NULL	GH	1.03185	423
3.2.1.21	Ascomycota	Sordariomycetes	Podzol	beta-glucosidase	GH3	Cellulose	Pathotroph	Endophyte-Fungal Parasite-Plant Pathogen	Probable	NULL	GH	1.03185	423
3.2.1.21	Ascomycota	Sordariomycetes	Podzol	beta-glucosidase	GH3	Cellulose	Pathotroph	Plant Pathogen	Probable	NULL	GH	1.03185	423
3.2.1.21	Ascomycota	Sordariomycetes	Podzol	beta-glucosidase	GH3	Cellulose	Symbiotroph	Endophyte	Probable	NULL	GH	1.03185	423
3.2.1.21	Basidiomycota	Ustilaginomycetes	Luvisol	beta-glucosidase	GH3	Cellulose	Pathotroph	Plant Pathogen	Highly Probable	Facultative Yeast	GH	0.984533	4
3.2.1.21	Basidiomycota	Ustilaginomycetes	Luvisol	beta-glucosidase	GH3	Cellulose	Pathotroph	Plant Pathogen	Probable	Smut	GH	0.984533	4
3.2.1.21	Basidiomycota	Ustilaginomycetes	Phaeozem	beta-glucosidase	GH3	Cellulose	Pathotroph	Plant Pathogen	Highly Probable	Facultative Yeast	GH	1.05591	5
3.2.1.21	Basidiomycota	Ustilaginomycetes	Phaeozem	beta-glucosidase	GH3	Cellulose	Pathotroph	Plant Pathogen	Probable	Smut	GH	1.05591	5
3.2.1.21	Mucoromycota	Mucoromycetes	Luvisol	beta-glucosidase	GH3	Cellulose	Pathotroph	Animal Pathogen	Probable	NULL	GH	0.984533	18
3.2.1.21	Mucoromycota	Mucoromycetes	Luvisol	beta-glucosidase	GH3	Cellulose	Pathotroph	Plant Pathogen	Probable	NULL	GH	0.984533	18
3.2.1.21	Mucoromycota	Mucoromycetes	Phaeozem	beta-glucosidase	GH3	Cellulose	Pathotroph	Animal Pathogen	Probable	NULL	GH	1.05591	25
3.2.1.21	Mucoromycota	Mucoromycetes	Phaeozem	beta-glucosidase	GH3	Cellulose	Pathotroph	Plant Pathogen	Probable	NULL	GH	1.05591	25
3.2.1.21	Mucoromycota	Mucoromycetes	Podzol	beta-glucosidase	GH3	Cellulose	Pathotroph	Animal Pathogen	Probable	NULL	GH	1.03185	23
3.2.1.21	Mucoromycota	Mucoromycetes	Podzol	beta-glucosidase	GH3	Cellulose	Pathotroph	Plant Pathogen	Probable	NULL	GH	1.03185	23
3.2.1.22	Ascomycota	Eurotiomycetes	Luvisol	alpha-galactosidase	GH27	Starch	Pathotroph	Animal Pathogen	Probable	Microfungus	GH	1.0607	42
3.2.1.22	Ascomycota	Eurotiomycetes	Luvisol	alpha-galactosidase	GH27	Starch	Pathotroph	Animal Pathogen	Probable	NULL	GH	1.0607	42
3.2.1.22	Ascomycota	Eurotiomycetes	Luvisol	alpha-galactosidase	GH27	Starch	Pathotroph	Plant Pathogen	Probable	Facultative Yeast	GH	1.0607	42
3.2.1.22	Ascomycota	Eurotiomycetes	Luvisol	alpha-galactosidase	GH27	Starch	Pathotroph	Plant Pathogen	Probable	NULL	GH	1.0607	42
3.2.1.22	Ascomycota	Eurotiomycetes	Luvisol	alpha-galactosidase	GH27	Starch	Saprotroph	Undefined Saprotroph	Probable	Microfungus	GH	1.0607	42
3.2.1.22	Ascomycota	Eurotiomycetes	Luvisol	alpha-galactosidase	GH27	Starch	Symbiotroph	Endophyte	Probable	NULL	GH	1.0607	42
3.2.1.22	Ascomycota	Eurotiomycetes	Luvisol	alpha-galactosidase	GH36	Starch	Pathotroph	Animal Pathogen	Probable	Microfungus	GH	1.0607	42
3.2.1.22	Ascomycota	Eurotiomycetes	Luvisol	alpha-galactosidase	GH36	Starch	Pathotroph	Animal Pathogen	Probable	NULL	GH	1.0607	42
3.2.1.22	Ascomycota	Eurotiomycetes	Luvisol	alpha-galactosidase	GH36	Starch	Pathotroph	Plant Pathogen	Probable	Facultative Yeast	GH	1.0607	42
3.2.1.22	Ascomycota	Eurotiomycetes	Luvisol	alpha-galactosidase	GH36	Starch	Pathotroph	Plant Pathogen	Probable	NULL	GH	1.0607	42
3.2.1.22	Ascomycota	Eurotiomycetes	Luvisol	alpha-galactosidase	GH36	Starch	Saprotroph	Undefined Saprotroph	Probable	Microfungus	GH	1.0607	42
3.2.1.22	Ascomycota	Eurotiomycetes	Luvisol	alpha-galactosidase	GH36	Starch	Symbiotroph	Endophyte	Probable	NULL	GH	1.0607	42
3.2.1.22	Ascomycota	Eurotiomycetes	Phaeozem	alpha-galactosidase	GH27	Starch	Pathotroph	Animal Pathogen	Probable	Microfungus	GH	1.01653	42
3.2.1.22	Ascomycota	Eurotiomycetes	Phaeozem	alpha-galactosidase	GH27	Starch	Pathotroph	Animal Pathogen	Probable	NULL	GH	1.01653	42
3.2.1.22	Ascomycota	Eurotiomycetes	Phaeozem	alpha-galactosidase	GH27	Starch	Pathotroph	Plant Pathogen	Probable	Facultative Yeast	GH	1.01653	42
3.2.1.22	Ascomycota	Eurotiomycetes	Phaeozem	alpha-galactosidase	GH27	Starch	Pathotroph	Plant Pathogen	Probable	NULL	GH	1.01653	42
3.2.1.22	Ascomycota	Eurotiomycetes	Phaeozem	alpha-galactosidase	GH27	Starch	Saprotroph	Undefined Saprotroph	Probable	Microfungus	GH	1.01653	42
3.2.1.22	Ascomycota	Eurotiomycetes	Phaeozem	alpha-galactosidase	GH27	Starch	Symbiotroph	Endophyte	Probable	NULL	GH	1.01653	42
3.2.1.22	Ascomycota	Eurotiomycetes	Phaeozem	alpha-galactosidase	GH36	Starch	Pathotroph	Animal Pathogen	Probable	Microfungus	GH	1.01653	42
3.2.1.22	Ascomycota	Eurotiomycetes	Phaeozem	alpha-galactosidase	GH36	Starch	Pathotroph	Animal Pathogen	Probable	NULL	GH	1.01653	42
3.2.1.22	Ascomycota	Eurotiomycetes	Phaeozem	alpha-galactosidase	GH36	Starch	Pathotroph	Plant Pathogen	Probable	Facultative Yeast	GH	1.01653	42
3.2.1.22	Ascomycota	Eurotiomycetes	Phaeozem	alpha-galactosidase	GH36	Starch	Pathotroph	Plant Pathogen	Probable	NULL	GH	1.01653	42
3.2.1.22	Ascomycota	Eurotiomycetes	Phaeozem	alpha-galactosidase	GH36	Starch	Saprotroph	Undefined Saprotroph	Probable	Microfungus	GH	1.01653	42
3.2.1.22	Ascomycota	Eurotiomycetes	Phaeozem	alpha-galactosidase	GH36	Starch	Symbiotroph	Endophyte	Probable	NULL	GH	1.01653	42
3.2.1.22	Ascomycota	Eurotiomycetes	Podzol	alpha-galactosidase	GH27	Starch	Pathotroph	Animal Pathogen	Probable	Microfungus	GH	1.18257	61
3.2.1.22	Ascomycota	Eurotiomycetes	Podzol	alpha-galactosidase	GH27	Starch	Pathotroph	Animal Pathogen	Probable	NULL	GH	1.18257	61
3.2.1.22	Ascomycota	Eurotiomycetes	Podzol	alpha-galactosidase	GH27	Starch	Pathotroph	Plant Pathogen	Probable	Facultative Yeast	GH	1.18257	61
3.2.1.22	Ascomycota	Eurotiomycetes	Podzol	alpha-galactosidase	GH27	Starch	Pathotroph	Plant Pathogen	Probable	NULL	GH	1.18257	61
3.2.1.22	Ascomycota	Eurotiomycetes	Podzol	alpha-galactosidase	GH27	Starch	Saprotroph	Undefined Saprotroph	Probable	Microfungus	GH	1.18257	61
3.2.1.22	Ascomycota	Eurotiomycetes	Podzol	alpha-galactosidase	GH27	Starch	Symbiotroph	Endophyte	Probable	NULL	GH	1.18257	61
3.2.1.22	Ascomycota	Eurotiomycetes	Podzol	alpha-galactosidase	GH36	Starch	Pathotroph	Animal Pathogen	Probable	Microfungus	GH	1.18257	61
3.2.1.22	Ascomycota	Eurotiomycetes	Podzol	alpha-galactosidase	GH36	Starch	Pathotroph	Animal Pathogen	Probable	NULL	GH	1.18257	61
3.2.1.22	Ascomycota	Eurotiomycetes	Podzol	alpha-galactosidase	GH36	Starch	Pathotroph	Plant Pathogen	Probable	Facultative Yeast	GH	1.18257	61
3.2.1.22	Ascomycota	Eurotiomycetes	Podzol	alpha-galactosidase	GH36	Starch	Pathotroph	Plant Pathogen	Probable	NULL	GH	1.18257	61
3.2.1.22	Ascomycota	Eurotiomycetes	Podzol	alpha-galactosidase	GH36	Starch	Saprotroph	Undefined Saprotroph	Probable	Microfungus	GH	1.18257	61
3.2.1.22	Ascomycota	Eurotiomycetes	Podzol	alpha-galactosidase	GH36	Starch	Symbiotroph	Endophyte	Probable	NULL	GH	1.18257	61
3.2.1.22	Ascomycota	Pichiomycetes	Luvisol	alpha-galactosidase	GH27	Starch	Saprotroph	Undefined Saprotroph	Highly Probable	Yeast	GH	1.0607	1
3.2.1.22	Ascomycota	Pichiomycetes	Phaeozem	alpha-galactosidase	GH27	Starch	Saprotroph	Undefined Saprotroph	Highly Probable	Yeast	GH	1.01653	2
3.2.1.22	Ascomycota	Pichiomycetes	Podzol	alpha-galactosidase	GH27	Starch	Saprotroph	Undefined Saprotroph	Highly Probable	Yeast	GH	1.18257	1
3.2.1.22	Ascomycota	Sordariomycetes	Luvisol	alpha-galactosidase	GH27	Starch	Pathotroph	Animal Pathogen	Probable	NULL	GH	1.0607	72
3.2.1.22	Ascomycota	Sordariomycetes	Luvisol	alpha-galactosidase	GH27	Starch	Pathotroph	Endophyte-Fungal Parasite-Plant Pathogen	Probable	NULL	GH	1.0607	72
3.2.1.22	Ascomycota	Sordariomycetes	Luvisol	alpha-galactosidase	GH27	Starch	Pathotroph	Plant Pathogen	Probable	NULL	GH	1.0607	72
3.2.1.22	Ascomycota	Sordariomycetes	Luvisol	alpha-galactosidase	GH27	Starch	Symbiotroph	Endophyte	Probable	NULL	GH	1.0607	72
3.2.1.22	Ascomycota	Sordariomycetes	Luvisol	alpha-galactosidase	GH36	Starch	Pathotroph	Animal Pathogen	Probable	NULL	GH	1.0607	72
3.2.1.22	Ascomycota	Sordariomycetes	Luvisol	alpha-galactosidase	GH36	Starch	Pathotroph	Endophyte-Fungal Parasite-Plant Pathogen	Probable	NULL	GH	1.0607	72
3.2.1.22	Ascomycota	Sordariomycetes	Luvisol	alpha-galactosidase	GH36	Starch	Pathotroph	Plant Pathogen	Probable	NULL	GH	1.0607	72
3.2.1.22	Ascomycota	Sordariomycetes	Luvisol	alpha-galactosidase	GH36	Starch	Symbiotroph	Endophyte	Probable	NULL	GH	1.0607	72
3.2.1.22	Ascomycota	Sordariomycetes	Phaeozem	alpha-galactosidase	GH27	Starch	Pathotroph	Animal Pathogen	Probable	NULL	GH	1.01653	56
3.2.1.22	Ascomycota	Sordariomycetes	Phaeozem	alpha-galactosidase	GH27	Starch	Pathotroph	Endophyte-Fungal Parasite-Plant Pathogen	Probable	NULL	GH	1.01653	56
3.2.1.22	Ascomycota	Sordariomycetes	Phaeozem	alpha-galactosidase	GH27	Starch	Pathotroph	Plant Pathogen	Probable	NULL	GH	1.01653	56
3.2.1.22	Ascomycota	Sordariomycetes	Phaeozem	alpha-galactosidase	GH27	Starch	Symbiotroph	Endophyte	Probable	NULL	GH	1.01653	56
3.2.1.22	Ascomycota	Sordariomycetes	Phaeozem	alpha-galactosidase	GH36	Starch	Pathotroph	Animal Pathogen	Probable	NULL	GH	1.01653	56
3.2.1.22	Ascomycota	Sordariomycetes	Phaeozem	alpha-galactosidase	GH36	Starch	Pathotroph	Endophyte-Fungal Parasite-Plant Pathogen	Probable	NULL	GH	1.01653	56
3.2.1.22	Ascomycota	Sordariomycetes	Phaeozem	alpha-galactosidase	GH36	Starch	Pathotroph	Plant Pathogen	Probable	NULL	GH	1.01653	56
3.2.1.22	Ascomycota	Sordariomycetes	Phaeozem	alpha-galactosidase	GH36	Starch	Symbiotroph	Endophyte	Probable	NULL	GH	1.01653	56
3.2.1.22	Ascomycota	Sordariomycetes	Podzol	alpha-galactosidase	GH27	Starch	Pathotroph	Animal Pathogen	Probable	NULL	GH	1.18257	107
3.2.1.22	Ascomycota	Sordariomycetes	Podzol	alpha-galactosidase	GH27	Starch	Pathotroph	Endophyte-Fungal Parasite-Plant Pathogen	Probable	NULL	GH	1.18257	107
3.2.1.22	Ascomycota	Sordariomycetes	Podzol	alpha-galactosidase	GH27	Starch	Pathotroph	Plant Pathogen	Probable	NULL	GH	1.18257	107
3.2.1.22	Ascomycota	Sordariomycetes	Podzol	alpha-galactosidase	GH27	Starch	Symbiotroph	Endophyte	Probable	NULL	GH	1.18257	107
3.2.1.22	Ascomycota	Sordariomycetes	Podzol	alpha-galactosidase	GH36	Starch	Pathotroph	Animal Pathogen	Probable	NULL	GH	1.18257	107
3.2.1.22	Ascomycota	Sordariomycetes	Podzol	alpha-galactosidase	GH36	Starch	Pathotroph	Endophyte-Fungal Parasite-Plant Pathogen	Probable	NULL	GH	1.18257	107
3.2.1.22	Ascomycota	Sordariomycetes	Podzol	alpha-galactosidase	GH36	Starch	Pathotroph	Plant Pathogen	Probable	NULL	GH	1.18257	107
3.2.1.22	Ascomycota	Sordariomycetes	Podzol	alpha-galactosidase	GH36	Starch	Symbiotroph	Endophyte	Probable	NULL	GH	1.18257	107
3.2.1.22	Mucoromycota	Mucoromycetes	Luvisol	alpha-galactosidase	GH36	Starch	Pathotroph	Plant Pathogen	Probable	NULL	GH	1.0607	17
3.2.1.22	Mucoromycota	Mucoromycetes	Phaeozem	alpha-galactosidase	GH36	Starch	Pathotroph	Plant Pathogen	Probable	NULL	GH	1.01653	14
3.2.1.22	Mucoromycota	Mucoromycetes	Podzol	alpha-galactosidase	GH36	Starch	Pathotroph	Plant Pathogen	Probable	NULL	GH	1.18257	22
3.2.1.22	Mucoromycota	Umbelopsidomycetes	Luvisol	alpha-galactosidase	GH27	Starch	Saprotroph	Undefined Saprotroph	Probable	NULL	GH	1.0607	1
3.2.1.22	Mucoromycota	Umbelopsidomycetes	Podzol	alpha-galactosidase	GH27	Starch	Saprotroph	Undefined Saprotroph	Probable	NULL	GH	1.18257	1
3.2.1.23	Ascomycota	Eurotiomycetes	Luvisol	beta-galactosidase	GH2	Hemicellulose	Pathotroph	Animal Pathogen	Probable	Microfungus	GH	0.992718	44
3.2.1.23	Ascomycota	Eurotiomycetes	Luvisol	beta-galactosidase	GH2	Hemicellulose	Saprotroph	Undefined Saprotroph	Probable	Microfungus	GH	0.992718	44
3.2.1.23	Ascomycota	Eurotiomycetes	Luvisol	beta-galactosidase	GH35	Hemicellulose	Pathotroph	Animal Pathogen	Probable	Microfungus	GH	0.992718	44
3.2.1.23	Ascomycota	Eurotiomycetes	Luvisol	beta-galactosidase	GH35	Hemicellulose	Pathotroph	Animal Pathogen	Probable	NULL	GH	0.992718	44
3.2.1.23	Ascomycota	Eurotiomycetes	Luvisol	beta-galactosidase	GH35	Hemicellulose	Pathotroph	Plant Pathogen	Probable	Facultative Yeast	GH	0.992718	44
3.2.1.23	Ascomycota	Eurotiomycetes	Luvisol	beta-galactosidase	GH35	Hemicellulose	Pathotroph	Plant Pathogen	Probable	NULL	GH	0.992718	44
3.2.1.23	Ascomycota	Eurotiomycetes	Luvisol	beta-galactosidase	GH35	Hemicellulose	Saprotroph	Undefined Saprotroph	Probable	Microfungus	GH	0.992718	44
3.2.1.23	Ascomycota	Eurotiomycetes	Luvisol	beta-galactosidase	GH35	Hemicellulose	Symbiotroph	Endophyte	Probable	NULL	GH	0.992718	44
3.2.1.23	Ascomycota	Eurotiomycetes	Phaeozem	beta-galactosidase	GH2	Hemicellulose	Pathotroph	Animal Pathogen	Probable	Microfungus	GH	1.07858	39
3.2.1.23	Ascomycota	Eurotiomycetes	Phaeozem	beta-galactosidase	GH2	Hemicellulose	Saprotroph	Undefined Saprotroph	Probable	Microfungus	GH	1.07858	39
3.2.1.23	Ascomycota	Eurotiomycetes	Phaeozem	beta-galactosidase	GH35	Hemicellulose	Pathotroph	Animal Pathogen	Probable	Microfungus	GH	1.07858	39
3.2.1.23	Ascomycota	Eurotiomycetes	Phaeozem	beta-galactosidase	GH35	Hemicellulose	Pathotroph	Animal Pathogen	Probable	NULL	GH	1.07858	39
3.2.1.23	Ascomycota	Eurotiomycetes	Phaeozem	beta-galactosidase	GH35	Hemicellulose	Pathotroph	Plant Pathogen	Probable	Facultative Yeast	GH	1.07858	39
3.2.1.23	Ascomycota	Eurotiomycetes	Phaeozem	beta-galactosidase	GH35	Hemicellulose	Pathotroph	Plant Pathogen	Probable	NULL	GH	1.07858	39
3.2.1.23	Ascomycota	Eurotiomycetes	Phaeozem	beta-galactosidase	GH35	Hemicellulose	Saprotroph	Undefined Saprotroph	Probable	Microfungus	GH	1.07858	39
3.2.1.23	Ascomycota	Eurotiomycetes	Phaeozem	beta-galactosidase	GH35	Hemicellulose	Symbiotroph	Endophyte	Probable	NULL	GH	1.07858	39
3.2.1.23	Ascomycota	Eurotiomycetes	Podzol	beta-galactosidase	GH2	Hemicellulose	Pathotroph	Animal Pathogen	Probable	Microfungus	GH	1.09815	62
3.2.1.23	Ascomycota	Eurotiomycetes	Podzol	beta-galactosidase	GH2	Hemicellulose	Saprotroph	Undefined Saprotroph	Probable	Microfungus	GH	1.09815	62
3.2.1.23	Ascomycota	Eurotiomycetes	Podzol	beta-galactosidase	GH35	Hemicellulose	Pathotroph	Animal Pathogen	Probable	Microfungus	GH	1.09815	62
3.2.1.23	Ascomycota	Eurotiomycetes	Podzol	beta-galactosidase	GH35	Hemicellulose	Pathotroph	Animal Pathogen	Probable	NULL	GH	1.09815	62
3.2.1.23	Ascomycota	Eurotiomycetes	Podzol	beta-galactosidase	GH35	Hemicellulose	Pathotroph	Plant Pathogen	Probable	Facultative Yeast	GH	1.09815	62
3.2.1.23	Ascomycota	Eurotiomycetes	Podzol	beta-galactosidase	GH35	Hemicellulose	Pathotroph	Plant Pathogen	Probable	NULL	GH	1.09815	62
3.2.1.23	Ascomycota	Eurotiomycetes	Podzol	beta-galactosidase	GH35	Hemicellulose	Saprotroph	Undefined Saprotroph	Probable	Microfungus	GH	1.09815	62
3.2.1.23	Ascomycota	Eurotiomycetes	Podzol	beta-galactosidase	GH35	Hemicellulose	Symbiotroph	Endophyte	Probable	NULL	GH	1.09815	62
3.2.1.23	Ascomycota	Sordariomycetes	Luvisol	beta-galactosidase	GH35	Hemicellulose	Pathotroph	Animal Pathogen	Probable	NULL	GH	0.992718	104
3.2.1.23	Ascomycota	Sordariomycetes	Luvisol	beta-galactosidase	GH35	Hemicellulose	Pathotroph	Endophyte-Fungal Parasite-Plant Pathogen	Probable	NULL	GH	0.992718	104
3.2.1.23	Ascomycota	Sordariomycetes	Luvisol	beta-galactosidase	GH35	Hemicellulose	Symbiotroph	Endophyte	Probable	NULL	GH	0.992718	104
3.2.1.23	Ascomycota	Sordariomycetes	Phaeozem	beta-galactosidase	GH35	Hemicellulose	Pathotroph	Animal Pathogen	Probable	NULL	GH	1.07858	61
3.2.1.23	Ascomycota	Sordariomycetes	Phaeozem	beta-galactosidase	GH35	Hemicellulose	Pathotroph	Endophyte-Fungal Parasite-Plant Pathogen	Probable	NULL	GH	1.07858	61
3.2.1.23	Ascomycota	Sordariomycetes	Phaeozem	beta-galactosidase	GH35	Hemicellulose	Symbiotroph	Endophyte	Probable	NULL	GH	1.07858	61
3.2.1.23	Ascomycota	Sordariomycetes	Podzol	beta-galactosidase	GH35	Hemicellulose	Pathotroph	Animal Pathogen	Probable	NULL	GH	1.09815	115
3.2.1.23	Ascomycota	Sordariomycetes	Podzol	beta-galactosidase	GH35	Hemicellulose	Pathotroph	Endophyte-Fungal Parasite-Plant Pathogen	Probable	NULL	GH	1.09815	115
3.2.1.23	Ascomycota	Sordariomycetes	Podzol	beta-galactosidase	GH35	Hemicellulose	Symbiotroph	Endophyte	Probable	NULL	GH	1.09815	115
3.2.1.25	Ascomycota	Eurotiomycetes	Luvisol	beta-mannosidase	GH2	Hemicellulose	Pathotroph	Animal Pathogen	Probable	Microfungus	GH	1	34
3.2.1.25	Ascomycota	Eurotiomycetes	Luvisol	beta-mannosidase	GH2	Hemicellulose	Saprotroph	Undefined Saprotroph	Probable	Microfungus	GH	1	34
3.2.1.25	Ascomycota	Eurotiomycetes	Phaeozem	beta-mannosidase	GH2	Hemicellulose	Pathotroph	Animal Pathogen	Probable	Microfungus	GH	1.11685	32
3.2.1.25	Ascomycota	Eurotiomycetes	Phaeozem	beta-mannosidase	GH2	Hemicellulose	Saprotroph	Undefined Saprotroph	Probable	Microfungus	GH	1.11685	32
3.2.1.25	Ascomycota	Eurotiomycetes	Podzol	beta-mannosidase	GH2	Hemicellulose	Pathotroph	Animal Pathogen	Probable	Microfungus	GH	1.16368	33
3.2.1.25	Ascomycota	Eurotiomycetes	Podzol	beta-mannosidase	GH2	Hemicellulose	Saprotroph	Undefined Saprotroph	Probable	Microfungus	GH	1.16368	33
3.2.1.25	Ascomycota	Sordariomycetes	Luvisol	beta-mannosidase	GH2	Hemicellulose	Pathotroph	Animal Pathogen	Probable	NULL	GH	1	61
3.2.1.25	Ascomycota	Sordariomycetes	Luvisol	beta-mannosidase	GH2	Hemicellulose	Pathotroph	Endophyte-Fungal Parasite-Plant Pathogen	Probable	NULL	GH	1	61
3.2.1.25	Ascomycota	Sordariomycetes	Luvisol	beta-mannosidase	GH2	Hemicellulose	Symbiotroph	Endophyte	Probable	NULL	GH	1	61
3.2.1.25	Ascomycota	Sordariomycetes	Phaeozem	beta-mannosidase	GH2	Hemicellulose	Pathotroph	Animal Pathogen	Probable	NULL	GH	1.11685	48
3.2.1.25	Ascomycota	Sordariomycetes	Phaeozem	beta-mannosidase	GH2	Hemicellulose	Pathotroph	Endophyte-Fungal Parasite-Plant Pathogen	Probable	NULL	GH	1.11685	48
3.2.1.25	Ascomycota	Sordariomycetes	Phaeozem	beta-mannosidase	GH2	Hemicellulose	Symbiotroph	Endophyte	Probable	NULL	GH	1.11685	48
3.2.1.25	Ascomycota	Sordariomycetes	Podzol	beta-mannosidase	GH2	Hemicellulose	Pathotroph	Animal Pathogen	Probable	NULL	GH	1.16368	85
3.2.1.25	Ascomycota	Sordariomycetes	Podzol	beta-mannosidase	GH2	Hemicellulose	Pathotroph	Endophyte-Fungal Parasite-Plant Pathogen	Probable	NULL	GH	1.16368	85
3.2.1.25	Ascomycota	Sordariomycetes	Podzol	beta-mannosidase	GH2	Hemicellulose	Symbiotroph	Endophyte	Probable	NULL	GH	1.16368	85
3.2.1.3	Ascomycota	Eurotiomycetes	Luvisol	exo-glucanase	GH15	Cellulose	Pathotroph	Animal Pathogen	Probable	Microfungus	GH	1.15504	18
3.2.1.3	Ascomycota	Eurotiomycetes	Luvisol	exo-glucanase	GH15	Cellulose	Pathotroph	Animal Pathogen	Probable	NULL	GH	1.15504	18
3.2.1.3	Ascomycota	Eurotiomycetes	Luvisol	exo-glucanase	GH15	Cellulose	Pathotroph	Plant Pathogen	Probable	Facultative Yeast	GH	1.15504	18
3.2.1.3	Ascomycota	Eurotiomycetes	Luvisol	exo-glucanase	GH15	Cellulose	Pathotroph	Plant Pathogen	Probable	NULL	GH	1.15504	18
3.2.1.3	Ascomycota	Eurotiomycetes	Luvisol	exo-glucanase	GH15	Cellulose	Saprotroph	Undefined Saprotroph	Probable	Microfungus	GH	1.15504	18
3.2.1.3	Ascomycota	Eurotiomycetes	Luvisol	exo-glucanase	GH15	Cellulose	Symbiotroph	Endophyte	Probable	NULL	GH	1.15504	18
3.2.1.3	Ascomycota	Eurotiomycetes	Phaeozem	exo-glucanase	GH15	Cellulose	Pathotroph	Animal Pathogen	Probable	Microfungus	GH	0.980769	11
3.2.1.3	Ascomycota	Eurotiomycetes	Phaeozem	exo-glucanase	GH15	Cellulose	Pathotroph	Animal Pathogen	Probable	NULL	GH	0.980769	11
3.2.1.3	Ascomycota	Eurotiomycetes	Phaeozem	exo-glucanase	GH15	Cellulose	Pathotroph	Plant Pathogen	Probable	Facultative Yeast	GH	0.980769	11
3.2.1.3	Ascomycota	Eurotiomycetes	Phaeozem	exo-glucanase	GH15	Cellulose	Pathotroph	Plant Pathogen	Probable	NULL	GH	0.980769	11
3.2.1.3	Ascomycota	Eurotiomycetes	Phaeozem	exo-glucanase	GH15	Cellulose	Saprotroph	Undefined Saprotroph	Probable	Microfungus	GH	0.980769	11
3.2.1.3	Ascomycota	Eurotiomycetes	Phaeozem	exo-glucanase	GH15	Cellulose	Symbiotroph	Endophyte	Probable	NULL	GH	0.980769	11
3.2.1.3	Ascomycota	Eurotiomycetes	Podzol	exo-glucanase	GH15	Cellulose	Pathotroph	Animal Pathogen	Probable	Microfungus	GH	1.08824	16
3.2.1.3	Ascomycota	Eurotiomycetes	Podzol	exo-glucanase	GH15	Cellulose	Pathotroph	Animal Pathogen	Probable	NULL	GH	1.08824	16
3.2.1.3	Ascomycota	Eurotiomycetes	Podzol	exo-glucanase	GH15	Cellulose	Pathotroph	Plant Pathogen	Probable	Facultative Yeast	GH	1.08824	16
3.2.1.3	Ascomycota	Eurotiomycetes	Podzol	exo-glucanase	GH15	Cellulose	Pathotroph	Plant Pathogen	Probable	NULL	GH	1.08824	16
3.2.1.3	Ascomycota	Eurotiomycetes	Podzol	exo-glucanase	GH15	Cellulose	Saprotroph	Undefined Saprotroph	Probable	Microfungus	GH	1.08824	16
3.2.1.3	Ascomycota	Eurotiomycetes	Podzol	exo-glucanase	GH15	Cellulose	Symbiotroph	Endophyte	Probable	NULL	GH	1.08824	16
3.2.1.3	Ascomycota	Saccharomycetes	Luvisol	exo-glucanase	GH15	Cellulose	Pathotroph	Animal Pathogen	Probable	NULL	GH	1.15504	4
3.2.1.3	Ascomycota	Saccharomycetes	Phaeozem	exo-glucanase	GH15	Cellulose	Pathotroph	Animal Pathogen	Probable	NULL	GH	0.980769	4
3.2.1.3	Basidiomycota	Agaricomycetes	Luvisol	exo-glucanase	GH15	Cellulose	Symbiotroph	Ectomycorrhizal	Highly Probable	Agaricoid	GH	1.15504	29
3.2.1.3	Basidiomycota	Agaricomycetes	Podzol	exo-glucanase	GH15	Cellulose	Symbiotroph	Ectomycorrhizal	Highly Probable	Agaricoid	GH	1.08824	24
3.2.1.3	Mucoromycota	Mucoromycetes	Luvisol	exo-glucanase	GH15	Cellulose	Pathotroph	Plant Pathogen	Probable	NULL	GH	1.15504	4
3.2.1.3	Mucoromycota	Mucoromycetes	Phaeozem	exo-glucanase	GH15	Cellulose	Pathotroph	Plant Pathogen	Probable	NULL	GH	0.980769	10
3.2.1.3	Mucoromycota	Mucoromycetes	Podzol	exo-glucanase	GH15	Cellulose	Pathotroph	Plant Pathogen	Probable	NULL	GH	1.08824	7
3.2.1.37	Ascomycota	Dothideomycetes	Luvisol	xylanase	GH43	Hemicellulose	Pathotroph	Plant Pathogen	Probable	NULL	GH	0.992593	11
3.2.1.37	Ascomycota	Dothideomycetes	Phaeozem	xylanase	GH43	Hemicellulose	Pathotroph	Plant Pathogen	Probable	NULL	GH	1.18261	13
3.2.1.37	Ascomycota	Dothideomycetes	Podzol	xylanase	GH43	Hemicellulose	Pathotroph	Plant Pathogen	Probable	NULL	GH	0.983471	16
3.2.1.37	Ascomycota	Eurotiomycetes	Luvisol	xylanase	GH3	Hemicellulose	Pathotroph	Animal Pathogen	Probable	Microfungus	GH	0.700104	19
3.2.1.37	Ascomycota	Eurotiomycetes	Luvisol	xylanase	GH3	Hemicellulose	Pathotroph	Animal Pathogen	Probable	NULL	GH	0.700104	19
3.2.1.37	Ascomycota	Eurotiomycetes	Luvisol	xylanase	GH3	Hemicellulose	Saprotroph	Undefined Saprotroph	Probable	Microfungus	GH	0.485507	19
3.2.1.37	Ascomycota	Eurotiomycetes	Luvisol	xylanase	GH43	Hemicellulose	Pathotroph	Animal Pathogen	Probable	Microfungus	GH	0.992593	19
3.2.1.37	Ascomycota	Eurotiomycetes	Luvisol	xylanase	GH43	Hemicellulose	Pathotroph	Animal Pathogen	Probable	NULL	GH	0.992593	19
3.2.1.37	Ascomycota	Eurotiomycetes	Luvisol	xylanase	GH43	Hemicellulose	Pathotroph	Plant Pathogen	Probable	Facultative Yeast	GH	0.992593	19
3.2.1.37	Ascomycota	Eurotiomycetes	Luvisol	xylanase	GH43	Hemicellulose	Pathotroph	Plant Pathogen	Probable	NULL	GH	0.992593	19
3.2.1.37	Ascomycota	Eurotiomycetes	Luvisol	xylanase	GH43	Hemicellulose	Saprotroph	Undefined Saprotroph	Probable	Microfungus	GH	0.992593	19
3.2.1.37	Ascomycota	Eurotiomycetes	Luvisol	xylanase	GH43	Hemicellulose	Symbiotroph	Endophyte	Probable	NULL	GH	0.992593	19
3.2.1.37	Ascomycota	Eurotiomycetes	Phaeozem	xylanase	GH3	Hemicellulose	Pathotroph	Animal Pathogen	Probable	Microfungus	GH	0.756396	17
3.2.1.37	Ascomycota	Eurotiomycetes	Phaeozem	xylanase	GH3	Hemicellulose	Pathotroph	Animal Pathogen	Probable	NULL	GH	0.756396	17
3.2.1.37	Ascomycota	Eurotiomycetes	Phaeozem	xylanase	GH3	Hemicellulose	Saprotroph	Undefined Saprotroph	Probable	Microfungus	GH	0.490975	17
3.2.1.37	Ascomycota	Eurotiomycetes	Phaeozem	xylanase	GH43	Hemicellulose	Pathotroph	Animal Pathogen	Probable	Microfungus	GH	1.18261	17
3.2.1.37	Ascomycota	Eurotiomycetes	Phaeozem	xylanase	GH43	Hemicellulose	Pathotroph	Animal Pathogen	Probable	NULL	GH	1.18261	17
3.2.1.37	Ascomycota	Eurotiomycetes	Phaeozem	xylanase	GH43	Hemicellulose	Pathotroph	Plant Pathogen	Probable	Facultative Yeast	GH	1.18261	17
3.2.1.37	Ascomycota	Eurotiomycetes	Phaeozem	xylanase	GH43	Hemicellulose	Pathotroph	Plant Pathogen	Probable	NULL	GH	1.18261	17
3.2.1.37	Ascomycota	Eurotiomycetes	Phaeozem	xylanase	GH43	Hemicellulose	Saprotroph	Undefined Saprotroph	Probable	Microfungus	GH	1.18261	17
3.2.1.37	Ascomycota	Eurotiomycetes	Phaeozem	xylanase	GH43	Hemicellulose	Symbiotroph	Endophyte	Probable	NULL	GH	1.18261	17
3.2.1.37	Ascomycota	Eurotiomycetes	Podzol	xylanase	GH3	Hemicellulose	Pathotroph	Animal Pathogen	Probable	Microfungus	GH	0.707491	13
3.2.1.37	Ascomycota	Eurotiomycetes	Podzol	xylanase	GH3	Hemicellulose	Pathotroph	Animal Pathogen	Probable	NULL	GH	0.707491	13
3.2.1.37	Ascomycota	Eurotiomycetes	Podzol	xylanase	GH3	Hemicellulose	Saprotroph	Undefined Saprotroph	Probable	Microfungus	GH	0.497908	13
3.2.1.37	Ascomycota	Eurotiomycetes	Podzol	xylanase	GH43	Hemicellulose	Pathotroph	Animal Pathogen	Probable	Microfungus	GH	0.983471	13
3.2.1.37	Ascomycota	Eurotiomycetes	Podzol	xylanase	GH43	Hemicellulose	Pathotroph	Animal Pathogen	Probable	NULL	GH	0.983471	13
3.2.1.37	Ascomycota	Eurotiomycetes	Podzol	xylanase	GH43	Hemicellulose	Pathotroph	Plant Pathogen	Probable	Facultative Yeast	GH	0.983471	13
3.2.1.37	Ascomycota	Eurotiomycetes	Podzol	xylanase	GH43	Hemicellulose	Pathotroph	Plant Pathogen	Probable	NULL	GH	0.983471	13
3.2.1.37	Ascomycota	Eurotiomycetes	Podzol	xylanase	GH43	Hemicellulose	Saprotroph	Undefined Saprotroph	Probable	Microfungus	GH	0.983471	13
3.2.1.37	Ascomycota	Eurotiomycetes	Podzol	xylanase	GH43	Hemicellulose	Symbiotroph	Endophyte	Probable	NULL	GH	0.983471	13
3.2.1.37	Ascomycota	Sordariomycetes	Luvisol	xylanase	GH3	Hemicellulose	Pathotroph	Animal Pathogen	Probable	NULL	GH	0.700104	37
3.2.1.37	Ascomycota	Sordariomycetes	Luvisol	xylanase	GH3	Hemicellulose	Pathotroph	Endophyte-Fungal Parasite-Plant Pathogen	Probable	NULL	GH	0.700104	37
3.2.1.37	Ascomycota	Sordariomycetes	Luvisol	xylanase	GH3	Hemicellulose	Symbiotroph	Endophyte	Probable	NULL	GH	0.992593	37
3.2.1.37	Ascomycota	Sordariomycetes	Luvisol	xylanase	GH54	Hemicellulose	Pathotroph	Animal Pathogen	Probable	NULL	GH	0.992593	37
3.2.1.37	Ascomycota	Sordariomycetes	Luvisol	xylanase	GH54	Hemicellulose	Pathotroph	Endophyte-Fungal Parasite-Plant Pathogen	Probable	NULL	GH	0.992593	37
3.2.1.37	Ascomycota	Sordariomycetes	Luvisol	xylanase	GH54	Hemicellulose	Symbiotroph	Endophyte	Probable	NULL	GH	0.992593	37
3.2.1.37	Ascomycota	Sordariomycetes	Phaeozem	xylanase	GH3	Hemicellulose	Pathotroph	Animal Pathogen	Probable	NULL	GH	0.756396	16
3.2.1.37	Ascomycota	Sordariomycetes	Phaeozem	xylanase	GH3	Hemicellulose	Pathotroph	Endophyte-Fungal Parasite-Plant Pathogen	Probable	NULL	GH	0.756396	16
3.2.1.37	Ascomycota	Sordariomycetes	Phaeozem	xylanase	GH3	Hemicellulose	Symbiotroph	Endophyte	Probable	NULL	GH	1.18261	16
3.2.1.37	Ascomycota	Sordariomycetes	Phaeozem	xylanase	GH54	Hemicellulose	Pathotroph	Animal Pathogen	Probable	NULL	GH	1.18261	16
3.2.1.37	Ascomycota	Sordariomycetes	Phaeozem	xylanase	GH54	Hemicellulose	Pathotroph	Endophyte-Fungal Parasite-Plant Pathogen	Probable	NULL	GH	1.18261	16
3.2.1.37	Ascomycota	Sordariomycetes	Phaeozem	xylanase	GH54	Hemicellulose	Symbiotroph	Endophyte	Probable	NULL	GH	1.18261	16
3.2.1.37	Ascomycota	Sordariomycetes	Podzol	xylanase	GH3	Hemicellulose	Pathotroph	Animal Pathogen	Probable	NULL	GH	0.707491	32
3.2.1.37	Ascomycota	Sordariomycetes	Podzol	xylanase	GH3	Hemicellulose	Pathotroph	Endophyte-Fungal Parasite-Plant Pathogen	Probable	NULL	GH	0.707491	32
3.2.1.37	Ascomycota	Sordariomycetes	Podzol	xylanase	GH3	Hemicellulose	Symbiotroph	Endophyte	Probable	NULL	GH	0.983471	32
3.2.1.37	Ascomycota	Sordariomycetes	Podzol	xylanase	GH54	Hemicellulose	Pathotroph	Animal Pathogen	Probable	NULL	GH	0.983471	32
3.2.1.37	Ascomycota	Sordariomycetes	Podzol	xylanase	GH54	Hemicellulose	Pathotroph	Endophyte-Fungal Parasite-Plant Pathogen	Probable	NULL	GH	0.983471	32
3.2.1.37	Ascomycota	Sordariomycetes	Podzol	xylanase	GH54	Hemicellulose	Symbiotroph	Endophyte	Probable	NULL	GH	0.983471	32
3.2.1.39	Ascomycota	Eurotiomycetes	Luvisol	endo-glucanase	GH16	Cellulose	Pathotroph	Animal Pathogen	Probable	Microfungus	GH	4.53347	33
3.2.1.39	Ascomycota	Eurotiomycetes	Luvisol	endo-glucanase	GH16	Cellulose	Saprotroph	Undefined Saprotroph	Probable	Microfungus	GH	0.969631	33
3.2.1.39	Ascomycota	Eurotiomycetes	Luvisol	endo-glucanase	GH81	Cellulose	Pathotroph	Animal Pathogen	Probable	Microfungus	GH	0.969631	33
3.2.1.39	Ascomycota	Eurotiomycetes	Luvisol	endo-glucanase	GH81	Cellulose	Saprotroph	Undefined Saprotroph	Probable	Microfungus	GH	0.969631	33
3.2.1.39	Ascomycota	Eurotiomycetes	Phaeozem	endo-glucanase	GH16	Cellulose	Pathotroph	Animal Pathogen	Probable	Microfungus	GH	3.949	42
3.2.1.39	Ascomycota	Eurotiomycetes	Phaeozem	endo-glucanase	GH16	Cellulose	Saprotroph	Undefined Saprotroph	Probable	Microfungus	GH	1.15876	42
3.2.1.39	Ascomycota	Eurotiomycetes	Phaeozem	endo-glucanase	GH81	Cellulose	Pathotroph	Animal Pathogen	Probable	Microfungus	GH	1.15876	42
3.2.1.39	Ascomycota	Eurotiomycetes	Phaeozem	endo-glucanase	GH81	Cellulose	Saprotroph	Undefined Saprotroph	Probable	Microfungus	GH	1.15876	42
3.2.1.39	Ascomycota	Eurotiomycetes	Podzol	endo-glucanase	GH16	Cellulose	Pathotroph	Animal Pathogen	Probable	Microfungus	GH	3.1335	40
3.2.1.39	Ascomycota	Eurotiomycetes	Podzol	endo-glucanase	GH16	Cellulose	Saprotroph	Undefined Saprotroph	Probable	Microfungus	GH	0.988304	40
3.2.1.39	Ascomycota	Eurotiomycetes	Podzol	endo-glucanase	GH81	Cellulose	Pathotroph	Animal Pathogen	Probable	Microfungus	GH	0.988304	40
3.2.1.39	Ascomycota	Eurotiomycetes	Podzol	endo-glucanase	GH81	Cellulose	Saprotroph	Undefined Saprotroph	Probable	Microfungus	GH	0.988304	40
3.2.1.39	Ascomycota	Sordariomycetes	Luvisol	endo-glucanase	GH55	Cellulose	Pathotroph	Animal Pathogen	Probable	NULL	GH	0.969631	80
3.2.1.39	Ascomycota	Sordariomycetes	Luvisol	endo-glucanase	GH55	Cellulose	Pathotroph	Endophyte-Fungal Parasite-Plant Pathogen	Probable	NULL	GH	0.969631	80
3.2.1.39	Ascomycota	Sordariomycetes	Luvisol	endo-glucanase	GH55	Cellulose	Symbiotroph	Endophyte	Probable	NULL	GH	0.969631	80
3.2.1.39	Ascomycota	Sordariomycetes	Phaeozem	endo-glucanase	GH55	Cellulose	Pathotroph	Animal Pathogen	Probable	NULL	GH	1.15876	81
3.2.1.39	Ascomycota	Sordariomycetes	Phaeozem	endo-glucanase	GH55	Cellulose	Pathotroph	Endophyte-Fungal Parasite-Plant Pathogen	Probable	NULL	GH	1.15876	81
3.2.1.39	Ascomycota	Sordariomycetes	Phaeozem	endo-glucanase	GH55	Cellulose	Symbiotroph	Endophyte	Probable	NULL	GH	1.15876	81
3.2.1.39	Ascomycota	Sordariomycetes	Podzol	endo-glucanase	GH55	Cellulose	Pathotroph	Animal Pathogen	Probable	NULL	GH	0.988304	106
3.2.1.39	Ascomycota	Sordariomycetes	Podzol	endo-glucanase	GH55	Cellulose	Pathotroph	Endophyte-Fungal Parasite-Plant Pathogen	Probable	NULL	GH	0.988304	106
3.2.1.39	Ascomycota	Sordariomycetes	Podzol	endo-glucanase	GH55	Cellulose	Symbiotroph	Endophyte	Probable	NULL	GH	0.988304	106
3.2.1.39	Basidiomycota	Ustilaginomycetes	Luvisol	endo-glucanase	GH16	Cellulose	Pathotroph	Plant Pathogen	Highly Probable	Facultative Yeast	GH	0.969631	5
3.2.1.39	Basidiomycota	Ustilaginomycetes	Luvisol	endo-glucanase	GH16	Cellulose	Pathotroph	Plant Pathogen	Probable	Smut	GH	0.969631	5
3.2.1.39	Basidiomycota	Ustilaginomycetes	Phaeozem	endo-glucanase	GH16	Cellulose	Pathotroph	Plant Pathogen	Highly Probable	Facultative Yeast	GH	1.15876	3
3.2.1.39	Basidiomycota	Ustilaginomycetes	Phaeozem	endo-glucanase	GH16	Cellulose	Pathotroph	Plant Pathogen	Probable	Smut	GH	1.15876	3
3.2.1.4	Ascomycota	Dothideomycetes	Luvisol	endo-glucanase	GH12	Cellulose	Pathotroph	Plant Pathogen	Probable	NULL	GH	1.62058	15
3.2.1.4	Ascomycota	Dothideomycetes	Luvisol	endo-glucanase	GH45	Cellulose	Pathotroph	Plant Pathogen	Probable	NULL	GH	0.935065	15
3.2.1.4	Ascomycota	Dothideomycetes	Phaeozem	endo-glucanase	GH12	Cellulose	Pathotroph	Plant Pathogen	Probable	NULL	GH	1.60354	20
3.2.1.4	Ascomycota	Dothideomycetes	Podzol	endo-glucanase	GH12	Cellulose	Pathotroph	Plant Pathogen	Probable	NULL	GH	1.93608	10
3.2.1.4	Ascomycota	Eurotiomycetes	Luvisol	endo-glucanase	GH12	Cellulose	Pathotroph	Animal Pathogen	Probable	Microfungus	GH	1.62058	9
3.2.1.4	Ascomycota	Eurotiomycetes	Luvisol	endo-glucanase	GH12	Cellulose	Pathotroph	Animal Pathogen	Probable	NULL	GH	1.62058	9
3.2.1.4	Ascomycota	Eurotiomycetes	Luvisol	endo-glucanase	GH12	Cellulose	Pathotroph	Plant Pathogen	Probable	Facultative Yeast	GH	1.62058	9
3.2.1.4	Ascomycota	Eurotiomycetes	Luvisol	endo-glucanase	GH12	Cellulose	Pathotroph	Plant Pathogen	Probable	NULL	GH	1.62058	9
3.2.1.4	Ascomycota	Eurotiomycetes	Luvisol	endo-glucanase	GH12	Cellulose	Saprotroph	Undefined Saprotroph	Probable	Microfungus	GH	1.84615	9
3.2.1.4	Ascomycota	Eurotiomycetes	Luvisol	endo-glucanase	GH12	Cellulose	Symbiotroph	Endophyte	Probable	NULL	GH	1.54506	9
3.2.1.4	Ascomycota	Eurotiomycetes	Luvisol	endo-glucanase	GH45	Cellulose	Pathotroph	Animal Pathogen	Probable	NULL	GH	0.935065	9
3.2.1.4	Ascomycota	Eurotiomycetes	Luvisol	endo-glucanase	GH45	Cellulose	Pathotroph	Plant Pathogen	Probable	Facultative Yeast	GH	0.935065	9
3.2.1.4	Ascomycota	Eurotiomycetes	Luvisol	endo-glucanase	GH45	Cellulose	Pathotroph	Plant Pathogen	Probable	NULL	GH	0.935065	9
3.2.1.4	Ascomycota	Eurotiomycetes	Luvisol	endo-glucanase	GH45	Cellulose	Symbiotroph	Endophyte	Probable	NULL	GH	0.935065	9
3.2.1.4	Ascomycota	Eurotiomycetes	Luvisol	endo-glucanase	GH5	Cellulose	Pathotroph	Animal Pathogen	Probable	Microfungus	GH	1.37288	9
3.2.1.4	Ascomycota	Eurotiomycetes	Luvisol	endo-glucanase	GH5	Cellulose	Pathotroph	Animal Pathogen	Probable	NULL	GH	1.37288	9
3.2.1.4	Ascomycota	Eurotiomycetes	Luvisol	endo-glucanase	GH5	Cellulose	Pathotroph	Plant Pathogen	Probable	Facultative Yeast	GH	1.37288	9
3.2.1.4	Ascomycota	Eurotiomycetes	Luvisol	endo-glucanase	GH5	Cellulose	Pathotroph	Plant Pathogen	Probable	NULL	GH	1.37288	9
3.2.1.4	Ascomycota	Eurotiomycetes	Luvisol	endo-glucanase	GH5	Cellulose	Saprotroph	Undefined Saprotroph	Probable	Microfungus	GH	1.79253	9
3.2.1.4	Ascomycota	Eurotiomycetes	Luvisol	endo-glucanase	GH5	Cellulose	Symbiotroph	Endophyte	Probable	NULL	GH	1.37288	9
3.2.1.4	Ascomycota	Eurotiomycetes	Luvisol	endo-glucanase	GH7	Cellulose	Pathotroph	Animal Pathogen	Probable	Microfungus	GH	0.935065	9
3.2.1.4	Ascomycota	Eurotiomycetes	Luvisol	endo-glucanase	GH7	Cellulose	Pathotroph	Animal Pathogen	Probable	NULL	GH	0.935065	9
3.2.1.4	Ascomycota	Eurotiomycetes	Luvisol	endo-glucanase	GH7	Cellulose	Pathotroph	Plant Pathogen	Probable	Facultative Yeast	GH	0.935065	9
3.2.1.4	Ascomycota	Eurotiomycetes	Luvisol	endo-glucanase	GH7	Cellulose	Pathotroph	Plant Pathogen	Probable	NULL	GH	0.935065	9
3.2.1.4	Ascomycota	Eurotiomycetes	Luvisol	endo-glucanase	GH7	Cellulose	Saprotroph	Undefined Saprotroph	Probable	Microfungus	GH	0.935065	9
3.2.1.4	Ascomycota	Eurotiomycetes	Luvisol	endo-glucanase	GH7	Cellulose	Symbiotroph	Endophyte	Probable	NULL	GH	0.935065	9
3.2.1.4	Ascomycota	Eurotiomycetes	Phaeozem	endo-glucanase	GH12	Cellulose	Pathotroph	Animal Pathogen	Probable	Microfungus	GH	1.60354	10
3.2.1.4	Ascomycota	Eurotiomycetes	Phaeozem	endo-glucanase	GH12	Cellulose	Pathotroph	Animal Pathogen	Probable	NULL	GH	1.60354	10
3.2.1.4	Ascomycota	Eurotiomycetes	Phaeozem	endo-glucanase	GH12	Cellulose	Pathotroph	Plant Pathogen	Probable	Facultative Yeast	GH	1.60354	10
3.2.1.4	Ascomycota	Eurotiomycetes	Phaeozem	endo-glucanase	GH12	Cellulose	Pathotroph	Plant Pathogen	Probable	NULL	GH	1.60354	10
3.2.1.4	Ascomycota	Eurotiomycetes	Phaeozem	endo-glucanase	GH12	Cellulose	Saprotroph	Undefined Saprotroph	Probable	Microfungus	GH	1.82788	10
3.2.1.4	Ascomycota	Eurotiomycetes	Phaeozem	endo-glucanase	GH12	Cellulose	Symbiotroph	Endophyte	Probable	NULL	GH	1.5285	10
3.2.1.4	Ascomycota	Eurotiomycetes	Phaeozem	endo-glucanase	GH45	Cellulose	Pathotroph	Animal Pathogen	Probable	NULL	GH	0.923478	10
3.2.1.4	Ascomycota	Eurotiomycetes	Phaeozem	endo-glucanase	GH45	Cellulose	Pathotroph	Plant Pathogen	Probable	Facultative Yeast	GH	0.923478	10
3.2.1.4	Ascomycota	Eurotiomycetes	Phaeozem	endo-glucanase	GH45	Cellulose	Pathotroph	Plant Pathogen	Probable	NULL	GH	0.923478	10
3.2.1.4	Ascomycota	Eurotiomycetes	Phaeozem	endo-glucanase	GH45	Cellulose	Symbiotroph	Endophyte	Probable	NULL	GH	0.923478	10
3.2.1.4	Ascomycota	Eurotiomycetes	Phaeozem	endo-glucanase	GH5	Cellulose	Pathotroph	Animal Pathogen	Probable	Microfungus	GH	1.35922	10
3.2.1.4	Ascomycota	Eurotiomycetes	Phaeozem	endo-glucanase	GH5	Cellulose	Pathotroph	Animal Pathogen	Probable	NULL	GH	1.35922	10
3.2.1.4	Ascomycota	Eurotiomycetes	Phaeozem	endo-glucanase	GH5	Cellulose	Pathotroph	Plant Pathogen	Probable	Facultative Yeast	GH	1.35922	10
3.2.1.4	Ascomycota	Eurotiomycetes	Phaeozem	endo-glucanase	GH5	Cellulose	Pathotroph	Plant Pathogen	Probable	NULL	GH	1.35922	10
3.2.1.4	Ascomycota	Eurotiomycetes	Phaeozem	endo-glucanase	GH5	Cellulose	Saprotroph	Undefined Saprotroph	Probable	Microfungus	GH	1.77889	10
3.2.1.4	Ascomycota	Eurotiomycetes	Phaeozem	endo-glucanase	GH5	Cellulose	Symbiotroph	Endophyte	Probable	NULL	GH	1.35922	10
3.2.1.4	Ascomycota	Eurotiomycetes	Phaeozem	endo-glucanase	GH7	Cellulose	Pathotroph	Animal Pathogen	Probable	Microfungus	GH	0.923478	10
3.2.1.4	Ascomycota	Eurotiomycetes	Phaeozem	endo-glucanase	GH7	Cellulose	Pathotroph	Animal Pathogen	Probable	NULL	GH	0.923478	10
3.2.1.4	Ascomycota	Eurotiomycetes	Phaeozem	endo-glucanase	GH7	Cellulose	Pathotroph	Plant Pathogen	Probable	Facultative Yeast	GH	0.923478	10
3.2.1.4	Ascomycota	Eurotiomycetes	Phaeozem	endo-glucanase	GH7	Cellulose	Pathotroph	Plant Pathogen	Probable	NULL	GH	0.923478	10
3.2.1.4	Ascomycota	Eurotiomycetes	Phaeozem	endo-glucanase	GH7	Cellulose	Saprotroph	Undefined Saprotroph	Probable	Microfungus	GH	0.923478	10
3.2.1.4	Ascomycota	Eurotiomycetes	Phaeozem	endo-glucanase	GH7	Cellulose	Symbiotroph	Endophyte	Probable	NULL	GH	0.923478	10
3.2.1.4	Ascomycota	Eurotiomycetes	Podzol	endo-glucanase	GH12	Cellulose	Pathotroph	Animal Pathogen	Probable	Microfungus	GH	1.93608	14
3.2.1.4	Ascomycota	Eurotiomycetes	Podzol	endo-glucanase	GH12	Cellulose	Pathotroph	Animal Pathogen	Probable	NULL	GH	1.93608	14
3.2.1.4	Ascomycota	Eurotiomycetes	Podzol	endo-glucanase	GH12	Cellulose	Pathotroph	Plant Pathogen	Probable	Facultative Yeast	GH	1.93608	14
3.2.1.4	Ascomycota	Eurotiomycetes	Podzol	endo-glucanase	GH12	Cellulose	Pathotroph	Plant Pathogen	Probable	NULL	GH	1.93608	14
3.2.1.4	Ascomycota	Eurotiomycetes	Podzol	endo-glucanase	GH12	Cellulose	Saprotroph	Undefined Saprotroph	Probable	Microfungus	GH	2.20882	14
3.2.1.4	Ascomycota	Eurotiomycetes	Podzol	endo-glucanase	GH12	Cellulose	Symbiotroph	Endophyte	Probable	NULL	GH	1.84496	14
3.2.1.4	Ascomycota	Eurotiomycetes	Podzol	endo-glucanase	GH45	Cellulose	Pathotroph	Animal Pathogen	Probable	NULL	GH	1.11215	14
3.2.1.4	Ascomycota	Eurotiomycetes	Podzol	endo-glucanase	GH45	Cellulose	Pathotroph	Plant Pathogen	Probable	Facultative Yeast	GH	1.11215	14
3.2.1.4	Ascomycota	Eurotiomycetes	Podzol	endo-glucanase	GH45	Cellulose	Pathotroph	Plant Pathogen	Probable	NULL	GH	1.11215	14
3.2.1.4	Ascomycota	Eurotiomycetes	Podzol	endo-glucanase	GH45	Cellulose	Symbiotroph	Endophyte	Probable	NULL	GH	1.11215	14
3.2.1.4	Ascomycota	Eurotiomycetes	Podzol	endo-glucanase	GH5	Cellulose	Pathotroph	Animal Pathogen	Probable	Microfungus	GH	1.61538	14
3.2.1.4	Ascomycota	Eurotiomycetes	Podzol	endo-glucanase	GH5	Cellulose	Pathotroph	Animal Pathogen	Probable	NULL	GH	1.61538	14
3.2.1.4	Ascomycota	Eurotiomycetes	Podzol	endo-glucanase	GH5	Cellulose	Pathotroph	Plant Pathogen	Probable	Facultative Yeast	GH	1.61538	14
3.2.1.4	Ascomycota	Eurotiomycetes	Podzol	endo-glucanase	GH5	Cellulose	Pathotroph	Plant Pathogen	Probable	NULL	GH	1.61538	14
3.2.1.4	Ascomycota	Eurotiomycetes	Podzol	endo-glucanase	GH5	Cellulose	Saprotroph	Undefined Saprotroph	Probable	Microfungus	GH	2.08772	14
3.2.1.4	Ascomycota	Eurotiomycetes	Podzol	endo-glucanase	GH5	Cellulose	Symbiotroph	Endophyte	Probable	NULL	GH	1.61538	14
3.2.1.4	Ascomycota	Eurotiomycetes	Podzol	endo-glucanase	GH7	Cellulose	Pathotroph	Animal Pathogen	Probable	Microfungus	GH	1.11215	14
3.2.1.4	Ascomycota	Eurotiomycetes	Podzol	endo-glucanase	GH7	Cellulose	Pathotroph	Animal Pathogen	Probable	NULL	GH	1.11215	14
3.2.1.4	Ascomycota	Eurotiomycetes	Podzol	endo-glucanase	GH7	Cellulose	Pathotroph	Plant Pathogen	Probable	Facultative Yeast	GH	1.11215	14
3.2.1.4	Ascomycota	Eurotiomycetes	Podzol	endo-glucanase	GH7	Cellulose	Pathotroph	Plant Pathogen	Probable	NULL	GH	1.11215	14
3.2.1.4	Ascomycota	Eurotiomycetes	Podzol	endo-glucanase	GH7	Cellulose	Saprotroph	Undefined Saprotroph	Probable	Microfungus	GH	1.11215	14
3.2.1.4	Ascomycota	Eurotiomycetes	Podzol	endo-glucanase	GH7	Cellulose	Symbiotroph	Endophyte	Probable	NULL	GH	1.11215	14
3.2.1.4	Ascomycota	Sordariomycetes	Luvisol	endo-glucanase	GH12	Cellulose	Pathotroph	Animal Pathogen	Probable	NULL	GH	1.62058	46
3.2.1.4	Ascomycota	Sordariomycetes	Luvisol	endo-glucanase	GH12	Cellulose	Pathotroph	Endophyte-Fungal Parasite-Plant Pathogen	Probable	NULL	GH	1.62058	46
3.2.1.4	Ascomycota	Sordariomycetes	Luvisol	endo-glucanase	GH12	Cellulose	Pathotroph	Plant Pathogen	Probable	NULL	GH	1.62058	46
3.2.1.4	Ascomycota	Sordariomycetes	Luvisol	endo-glucanase	GH12	Cellulose	Symbiotroph	Endophyte	Highly Probable	NULL	GH	1.54506	46
3.2.1.4	Ascomycota	Sordariomycetes	Luvisol	endo-glucanase	GH12	Cellulose	Symbiotroph	Endophyte	Probable	NULL	GH	1.54506	46
3.2.1.4	Ascomycota	Sordariomycetes	Luvisol	endo-glucanase	GH45	Cellulose	Pathotroph	Animal Pathogen	Probable	NULL	GH	0.935065	46
3.2.1.4	Ascomycota	Sordariomycetes	Luvisol	endo-glucanase	GH45	Cellulose	Pathotroph	Endophyte-Fungal Parasite-Plant Pathogen	Probable	NULL	GH	0.935065	46
3.2.1.4	Ascomycota	Sordariomycetes	Luvisol	endo-glucanase	GH45	Cellulose	Symbiotroph	Endophyte	Probable	NULL	GH	0.935065	46
3.2.1.4	Ascomycota	Sordariomycetes	Luvisol	endo-glucanase	GH5	Cellulose	Pathotroph	Animal Pathogen	Probable	NULL	GH	1.37288	46
3.2.1.4	Ascomycota	Sordariomycetes	Luvisol	endo-glucanase	GH5	Cellulose	Pathotroph	Endophyte-Fungal Parasite-Plant Pathogen	Probable	NULL	GH	1.37288	46
3.2.1.4	Ascomycota	Sordariomycetes	Luvisol	endo-glucanase	GH5	Cellulose	Symbiotroph	Endophyte	Probable	NULL	GH	1.37288	46
3.2.1.4	Ascomycota	Sordariomycetes	Luvisol	endo-glucanase	GH7	Cellulose	Pathotroph	Animal Pathogen	Probable	NULL	GH	0.935065	46
3.2.1.4	Ascomycota	Sordariomycetes	Luvisol	endo-glucanase	GH7	Cellulose	Pathotroph	Endophyte-Fungal Parasite-Plant Pathogen	Probable	NULL	GH	0.935065	46
3.2.1.4	Ascomycota	Sordariomycetes	Luvisol	endo-glucanase	GH7	Cellulose	Pathotroph	Plant Pathogen	Probable	NULL	GH	0.935065	46
3.2.1.4	Ascomycota	Sordariomycetes	Luvisol	endo-glucanase	GH7	Cellulose	Symbiotroph	Endophyte	Probable	NULL	GH	0.935065	46
3.2.1.4	Ascomycota	Sordariomycetes	Phaeozem	endo-glucanase	GH12	Cellulose	Pathotroph	Animal Pathogen	Probable	NULL	GH	1.60354	40
3.2.1.4	Ascomycota	Sordariomycetes	Phaeozem	endo-glucanase	GH12	Cellulose	Pathotroph	Endophyte-Fungal Parasite-Plant Pathogen	Probable	NULL	GH	1.60354	40
3.2.1.4	Ascomycota	Sordariomycetes	Phaeozem	endo-glucanase	GH12	Cellulose	Pathotroph	Plant Pathogen	Probable	NULL	GH	1.60354	40
3.2.1.4	Ascomycota	Sordariomycetes	Phaeozem	endo-glucanase	GH12	Cellulose	Symbiotroph	Endophyte	Highly Probable	NULL	GH	1.5285	40
3.2.1.4	Ascomycota	Sordariomycetes	Phaeozem	endo-glucanase	GH12	Cellulose	Symbiotroph	Endophyte	Probable	NULL	GH	1.5285	40
3.2.1.4	Ascomycota	Sordariomycetes	Phaeozem	endo-glucanase	GH45	Cellulose	Pathotroph	Animal Pathogen	Probable	NULL	GH	0.923478	40
3.2.1.4	Ascomycota	Sordariomycetes	Phaeozem	endo-glucanase	GH45	Cellulose	Pathotroph	Endophyte-Fungal Parasite-Plant Pathogen	Probable	NULL	GH	0.923478	40
3.2.1.4	Ascomycota	Sordariomycetes	Phaeozem	endo-glucanase	GH45	Cellulose	Symbiotroph	Endophyte	Probable	NULL	GH	0.923478	40
3.2.1.4	Ascomycota	Sordariomycetes	Phaeozem	endo-glucanase	GH5	Cellulose	Pathotroph	Animal Pathogen	Probable	NULL	GH	1.35922	40
3.2.1.4	Ascomycota	Sordariomycetes	Phaeozem	endo-glucanase	GH5	Cellulose	Pathotroph	Endophyte-Fungal Parasite-Plant Pathogen	Probable	NULL	GH	1.35922	40
3.2.1.4	Ascomycota	Sordariomycetes	Phaeozem	endo-glucanase	GH5	Cellulose	Symbiotroph	Endophyte	Probable	NULL	GH	1.35922	40
3.2.1.4	Ascomycota	Sordariomycetes	Phaeozem	endo-glucanase	GH7	Cellulose	Pathotroph	Animal Pathogen	Probable	NULL	GH	0.923478	40
3.2.1.4	Ascomycota	Sordariomycetes	Phaeozem	endo-glucanase	GH7	Cellulose	Pathotroph	Endophyte-Fungal Parasite-Plant Pathogen	Probable	NULL	GH	0.923478	40
3.2.1.4	Ascomycota	Sordariomycetes	Phaeozem	endo-glucanase	GH7	Cellulose	Pathotroph	Plant Pathogen	Probable	NULL	GH	0.923478	40
3.2.1.4	Ascomycota	Sordariomycetes	Phaeozem	endo-glucanase	GH7	Cellulose	Symbiotroph	Endophyte	Probable	NULL	GH	0.923478	40
3.2.1.4	Ascomycota	Sordariomycetes	Podzol	endo-glucanase	GH12	Cellulose	Pathotroph	Animal Pathogen	Probable	NULL	GH	1.93608	38
3.2.1.4	Ascomycota	Sordariomycetes	Podzol	endo-glucanase	GH12	Cellulose	Pathotroph	Endophyte-Fungal Parasite-Plant Pathogen	Probable	NULL	GH	1.93608	38
3.2.1.4	Ascomycota	Sordariomycetes	Podzol	endo-glucanase	GH12	Cellulose	Pathotroph	Plant Pathogen	Probable	NULL	GH	1.93608	38
3.2.1.4	Ascomycota	Sordariomycetes	Podzol	endo-glucanase	GH12	Cellulose	Symbiotroph	Endophyte	Highly Probable	NULL	GH	1.84496	38
3.2.1.4	Ascomycota	Sordariomycetes	Podzol	endo-glucanase	GH12	Cellulose	Symbiotroph	Endophyte	Probable	NULL	GH	1.84496	38
3.2.1.4	Ascomycota	Sordariomycetes	Podzol	endo-glucanase	GH45	Cellulose	Pathotroph	Animal Pathogen	Probable	NULL	GH	1.11215	38
3.2.1.4	Ascomycota	Sordariomycetes	Podzol	endo-glucanase	GH45	Cellulose	Pathotroph	Endophyte-Fungal Parasite-Plant Pathogen	Probable	NULL	GH	1.11215	38
3.2.1.4	Ascomycota	Sordariomycetes	Podzol	endo-glucanase	GH45	Cellulose	Symbiotroph	Endophyte	Probable	NULL	GH	1.11215	38
3.2.1.4	Ascomycota	Sordariomycetes	Podzol	endo-glucanase	GH5	Cellulose	Pathotroph	Animal Pathogen	Probable	NULL	GH	1.61538	38
3.2.1.4	Ascomycota	Sordariomycetes	Podzol	endo-glucanase	GH5	Cellulose	Pathotroph	Endophyte-Fungal Parasite-Plant Pathogen	Probable	NULL	GH	1.61538	38
3.2.1.4	Ascomycota	Sordariomycetes	Podzol	endo-glucanase	GH5	Cellulose	Symbiotroph	Endophyte	Probable	NULL	GH	1.61538	38
3.2.1.4	Ascomycota	Sordariomycetes	Podzol	endo-glucanase	GH7	Cellulose	Pathotroph	Animal Pathogen	Probable	NULL	GH	1.11215	38
3.2.1.4	Ascomycota	Sordariomycetes	Podzol	endo-glucanase	GH7	Cellulose	Pathotroph	Endophyte-Fungal Parasite-Plant Pathogen	Probable	NULL	GH	1.11215	38
3.2.1.4	Ascomycota	Sordariomycetes	Podzol	endo-glucanase	GH7	Cellulose	Pathotroph	Plant Pathogen	Probable	NULL	GH	1.11215	38
3.2.1.4	Ascomycota	Sordariomycetes	Podzol	endo-glucanase	GH7	Cellulose	Symbiotroph	Endophyte	Probable	NULL	GH	1.11215	38
3.2.1.4	Basidiomycota	Agaricomycetes	Luvisol	endo-glucanase	GH5	Cellulose	Symbiotroph	Ectomycorrhizal	Highly Probable	Agaricoid	GH	0.935065	48
3.2.1.4	Basidiomycota	Agaricomycetes	Podzol	endo-glucanase	GH5	Cellulose	Symbiotroph	Ectomycorrhizal	Highly Probable	Agaricoid	GH	1.11215	55
3.2.1.4	Basidiomycota	Tremellomycetes	Phaeozem	endo-glucanase	GH5	Cellulose	Pathotroph	Animal Pathogen	Highly Probable	Yeast	GH	0.923478	1
3.2.1.4	Basidiomycota	Tremellomycetes	Podzol	endo-glucanase	GH5	Cellulose	Pathotroph	Animal Pathogen	Highly Probable	Yeast	GH	1.11215	8
3.2.1.4	Chytridiomycota	Chytridiomycetes	Luvisol	endo-glucanase	GH45	Cellulose	Saprotroph	Undefined Saprotroph	Probable	NULL	GH	0.935065	1
3.2.1.4	Chytridiomycota	Chytridiomycetes	Phaeozem	endo-glucanase	GH45	Cellulose	Saprotroph	Undefined Saprotroph	Probable	NULL	GH	0.923478	4
3.2.1.4	Chytridiomycota	Chytridiomycetes	Podzol	endo-glucanase	GH45	Cellulose	Saprotroph	Undefined Saprotroph	Probable	NULL	GH	1.11215	4
3.2.1.4	Mucoromycota	Mucoromycetes	Luvisol	endo-glucanase	GH45	Cellulose	Pathotroph	Animal Pathogen	Probable	NULL	GH	0.935065	10
3.2.1.4	Mucoromycota	Mucoromycetes	Luvisol	endo-glucanase	GH45	Cellulose	Pathotroph	Plant Pathogen	Probable	NULL	GH	0.935065	10
3.2.1.4	Mucoromycota	Mucoromycetes	Phaeozem	endo-glucanase	GH45	Cellulose	Pathotroph	Animal Pathogen	Probable	NULL	GH	0.923478	9
3.2.1.4	Mucoromycota	Mucoromycetes	Phaeozem	endo-glucanase	GH45	Cellulose	Pathotroph	Plant Pathogen	Probable	NULL	GH	0.923478	9
3.2.1.4	Mucoromycota	Mucoromycetes	Podzol	endo-glucanase	GH45	Cellulose	Pathotroph	Animal Pathogen	Probable	NULL	GH	1.11215	16
3.2.1.4	Mucoromycota	Mucoromycetes	Podzol	endo-glucanase	GH45	Cellulose	Pathotroph	Plant Pathogen	Probable	NULL	GH	1.11215	16
3.2.1.55	Ascomycota	Eurotiomycetes	Luvisol	arabinofuranosidase	GH43	Hemicellulose	Pathotroph	Animal Pathogen	Probable	NULL	GH	0.891626	43
3.2.1.55	Ascomycota	Eurotiomycetes	Luvisol	arabinofuranosidase	GH43	Hemicellulose	Pathotroph	Plant Pathogen	Probable	Facultative Yeast	GH	0.891626	43
3.2.1.55	Ascomycota	Eurotiomycetes	Luvisol	arabinofuranosidase	GH43	Hemicellulose	Pathotroph	Plant Pathogen	Probable	NULL	GH	0.891626	43
3.2.1.55	Ascomycota	Eurotiomycetes	Luvisol	arabinofuranosidase	GH43	Hemicellulose	Symbiotroph	Endophyte	Probable	NULL	GH	0.891626	43
3.2.1.55	Ascomycota	Eurotiomycetes	Luvisol	arabinofuranosidase	GH51	Hemicellulose	Pathotroph	Animal Pathogen	Probable	Microfungus	GH	0.891626	43
3.2.1.55	Ascomycota	Eurotiomycetes	Luvisol	arabinofuranosidase	GH51	Hemicellulose	Pathotroph	Animal Pathogen	Probable	NULL	GH	0.891626	43
3.2.1.55	Ascomycota	Eurotiomycetes	Luvisol	arabinofuranosidase	GH51	Hemicellulose	Pathotroph	Plant Pathogen	Probable	Facultative Yeast	GH	0.891626	43
3.2.1.55	Ascomycota	Eurotiomycetes	Luvisol	arabinofuranosidase	GH51	Hemicellulose	Pathotroph	Plant Pathogen	Probable	NULL	GH	0.891626	43
3.2.1.55	Ascomycota	Eurotiomycetes	Luvisol	arabinofuranosidase	GH51	Hemicellulose	Saprotroph	Undefined Saprotroph	Probable	Microfungus	GH	0.891626	43
3.2.1.55	Ascomycota	Eurotiomycetes	Luvisol	arabinofuranosidase	GH51	Hemicellulose	Symbiotroph	Endophyte	Probable	NULL	GH	0.891626	43
3.2.1.55	Ascomycota	Eurotiomycetes	Luvisol	arabinofuranosidase	GH54	Hemicellulose	Pathotroph	Animal Pathogen	Probable	Microfungus	GH	0.891626	43
3.2.1.55	Ascomycota	Eurotiomycetes	Luvisol	arabinofuranosidase	GH54	Hemicellulose	Pathotroph	Animal Pathogen	Probable	NULL	GH	0.891626	43
3.2.1.55	Ascomycota	Eurotiomycetes	Luvisol	arabinofuranosidase	GH54	Hemicellulose	Pathotroph	Plant Pathogen	Probable	Facultative Yeast	GH	0.891626	43
3.2.1.55	Ascomycota	Eurotiomycetes	Luvisol	arabinofuranosidase	GH54	Hemicellulose	Pathotroph	Plant Pathogen	Probable	NULL	GH	0.891626	43
3.2.1.55	Ascomycota	Eurotiomycetes	Luvisol	arabinofuranosidase	GH54	Hemicellulose	Saprotroph	Undefined Saprotroph	Probable	Microfungus	GH	0.891626	43
3.2.1.55	Ascomycota	Eurotiomycetes	Luvisol	arabinofuranosidase	GH54	Hemicellulose	Symbiotroph	Endophyte	Probable	NULL	GH	0.891626	43
3.2.1.55	Ascomycota	Eurotiomycetes	Luvisol	arabinofuranosidase	GH62	Hemicellulose	Pathotroph	Animal Pathogen	Probable	Microfungus	GH	0.891626	43
3.2.1.55	Ascomycota	Eurotiomycetes	Luvisol	arabinofuranosidase	GH62	Hemicellulose	Pathotroph	Animal Pathogen	Probable	NULL	GH	0.891626	43
3.2.1.55	Ascomycota	Eurotiomycetes	Luvisol	arabinofuranosidase	GH62	Hemicellulose	Pathotroph	Plant Pathogen	Probable	Facultative Yeast	GH	0.891626	43
3.2.1.55	Ascomycota	Eurotiomycetes	Luvisol	arabinofuranosidase	GH62	Hemicellulose	Pathotroph	Plant Pathogen	Probable	NULL	GH	0.891626	43
3.2.1.55	Ascomycota	Eurotiomycetes	Luvisol	arabinofuranosidase	GH62	Hemicellulose	Saprotroph	Undefined Saprotroph	Probable	Microfungus	GH	0.891626	43
3.2.1.55	Ascomycota	Eurotiomycetes	Luvisol	arabinofuranosidase	GH62	Hemicellulose	Symbiotroph	Endophyte	Probable	NULL	GH	0.891626	43
3.2.1.55	Ascomycota	Eurotiomycetes	Phaeozem	arabinofuranosidase	GH43	Hemicellulose	Pathotroph	Animal Pathogen	Probable	NULL	GH	1.13443	22
3.2.1.55	Ascomycota	Eurotiomycetes	Phaeozem	arabinofuranosidase	GH43	Hemicellulose	Pathotroph	Plant Pathogen	Probable	Facultative Yeast	GH	1.13443	22
3.2.1.55	Ascomycota	Eurotiomycetes	Phaeozem	arabinofuranosidase	GH43	Hemicellulose	Pathotroph	Plant Pathogen	Probable	NULL	GH	1.13443	22
3.2.1.55	Ascomycota	Eurotiomycetes	Phaeozem	arabinofuranosidase	GH43	Hemicellulose	Symbiotroph	Endophyte	Probable	NULL	GH	1.13443	22
3.2.1.55	Ascomycota	Eurotiomycetes	Phaeozem	arabinofuranosidase	GH51	Hemicellulose	Pathotroph	Animal Pathogen	Probable	Microfungus	GH	1.13443	22
3.2.1.55	Ascomycota	Eurotiomycetes	Phaeozem	arabinofuranosidase	GH51	Hemicellulose	Pathotroph	Animal Pathogen	Probable	NULL	GH	1.13443	22
3.2.1.55	Ascomycota	Eurotiomycetes	Phaeozem	arabinofuranosidase	GH51	Hemicellulose	Pathotroph	Plant Pathogen	Probable	Facultative Yeast	GH	1.13443	22
3.2.1.55	Ascomycota	Eurotiomycetes	Phaeozem	arabinofuranosidase	GH51	Hemicellulose	Pathotroph	Plant Pathogen	Probable	NULL	GH	1.13443	22
3.2.1.55	Ascomycota	Eurotiomycetes	Phaeozem	arabinofuranosidase	GH51	Hemicellulose	Saprotroph	Undefined Saprotroph	Probable	Microfungus	GH	1.13443	22
3.2.1.55	Ascomycota	Eurotiomycetes	Phaeozem	arabinofuranosidase	GH51	Hemicellulose	Symbiotroph	Endophyte	Probable	NULL	GH	1.13443	22
3.2.1.55	Ascomycota	Eurotiomycetes	Phaeozem	arabinofuranosidase	GH54	Hemicellulose	Pathotroph	Animal Pathogen	Probable	Microfungus	GH	1.13443	22
3.2.1.55	Ascomycota	Eurotiomycetes	Phaeozem	arabinofuranosidase	GH54	Hemicellulose	Pathotroph	Animal Pathogen	Probable	NULL	GH	1.13443	22
3.2.1.55	Ascomycota	Eurotiomycetes	Phaeozem	arabinofuranosidase	GH54	Hemicellulose	Pathotroph	Plant Pathogen	Probable	Facultative Yeast	GH	1.13443	22
3.2.1.55	Ascomycota	Eurotiomycetes	Phaeozem	arabinofuranosidase	GH54	Hemicellulose	Pathotroph	Plant Pathogen	Probable	NULL	GH	1.13443	22
3.2.1.55	Ascomycota	Eurotiomycetes	Phaeozem	arabinofuranosidase	GH54	Hemicellulose	Saprotroph	Undefined Saprotroph	Probable	Microfungus	GH	1.13443	22
3.2.1.55	Ascomycota	Eurotiomycetes	Phaeozem	arabinofuranosidase	GH54	Hemicellulose	Symbiotroph	Endophyte	Probable	NULL	GH	1.13443	22
3.2.1.55	Ascomycota	Eurotiomycetes	Phaeozem	arabinofuranosidase	GH62	Hemicellulose	Pathotroph	Animal Pathogen	Probable	Microfungus	GH	1.13443	22
3.2.1.55	Ascomycota	Eurotiomycetes	Phaeozem	arabinofuranosidase	GH62	Hemicellulose	Pathotroph	Animal Pathogen	Probable	NULL	GH	1.13443	22
3.2.1.55	Ascomycota	Eurotiomycetes	Phaeozem	arabinofuranosidase	GH62	Hemicellulose	Pathotroph	Plant Pathogen	Probable	Facultative Yeast	GH	1.13443	22
3.2.1.55	Ascomycota	Eurotiomycetes	Phaeozem	arabinofuranosidase	GH62	Hemicellulose	Pathotroph	Plant Pathogen	Probable	NULL	GH	1.13443	22
3.2.1.55	Ascomycota	Eurotiomycetes	Phaeozem	arabinofuranosidase	GH62	Hemicellulose	Saprotroph	Undefined Saprotroph	Probable	Microfungus	GH	1.13443	22
3.2.1.55	Ascomycota	Eurotiomycetes	Phaeozem	arabinofuranosidase	GH62	Hemicellulose	Symbiotroph	Endophyte	Probable	NULL	GH	1.13443	22
3.2.1.55	Ascomycota	Eurotiomycetes	Podzol	arabinofuranosidase	GH43	Hemicellulose	Pathotroph	Animal Pathogen	Probable	NULL	GH	1.22338	43
3.2.1.55	Ascomycota	Eurotiomycetes	Podzol	arabinofuranosidase	GH43	Hemicellulose	Pathotroph	Plant Pathogen	Probable	Facultative Yeast	GH	1.22338	43
3.2.1.55	Ascomycota	Eurotiomycetes	Podzol	arabinofuranosidase	GH43	Hemicellulose	Pathotroph	Plant Pathogen	Probable	NULL	GH	1.22338	43
3.2.1.55	Ascomycota	Eurotiomycetes	Podzol	arabinofuranosidase	GH43	Hemicellulose	Symbiotroph	Endophyte	Probable	NULL	GH	1.22338	43
3.2.1.55	Ascomycota	Eurotiomycetes	Podzol	arabinofuranosidase	GH51	Hemicellulose	Pathotroph	Animal Pathogen	Probable	Microfungus	GH	1.22338	43
3.2.1.55	Ascomycota	Eurotiomycetes	Podzol	arabinofuranosidase	GH51	Hemicellulose	Pathotroph	Animal Pathogen	Probable	NULL	GH	1.22338	43
3.2.1.55	Ascomycota	Eurotiomycetes	Podzol	arabinofuranosidase	GH51	Hemicellulose	Pathotroph	Plant Pathogen	Probable	Facultative Yeast	GH	1.22338	43
3.2.1.55	Ascomycota	Eurotiomycetes	Podzol	arabinofuranosidase	GH51	Hemicellulose	Pathotroph	Plant Pathogen	Probable	NULL	GH	1.22338	43
3.2.1.55	Ascomycota	Eurotiomycetes	Podzol	arabinofuranosidase	GH51	Hemicellulose	Saprotroph	Undefined Saprotroph	Probable	Microfungus	GH	1.22338	43
3.2.1.55	Ascomycota	Eurotiomycetes	Podzol	arabinofuranosidase	GH51	Hemicellulose	Symbiotroph	Endophyte	Probable	NULL	GH	1.22338	43
3.2.1.55	Ascomycota	Eurotiomycetes	Podzol	arabinofuranosidase	GH54	Hemicellulose	Pathotroph	Animal Pathogen	Probable	Microfungus	GH	1.22338	43
3.2.1.55	Ascomycota	Eurotiomycetes	Podzol	arabinofuranosidase	GH54	Hemicellulose	Pathotroph	Animal Pathogen	Probable	NULL	GH	1.22338	43
3.2.1.55	Ascomycota	Eurotiomycetes	Podzol	arabinofuranosidase	GH54	Hemicellulose	Pathotroph	Plant Pathogen	Probable	Facultative Yeast	GH	1.22338	43
3.2.1.55	Ascomycota	Eurotiomycetes	Podzol	arabinofuranosidase	GH54	Hemicellulose	Pathotroph	Plant Pathogen	Probable	NULL	GH	1.22338	43
3.2.1.55	Ascomycota	Eurotiomycetes	Podzol	arabinofuranosidase	GH54	Hemicellulose	Saprotroph	Undefined Saprotroph	Probable	Microfungus	GH	1.22338	43
3.2.1.55	Ascomycota	Eurotiomycetes	Podzol	arabinofuranosidase	GH54	Hemicellulose	Symbiotroph	Endophyte	Probable	NULL	GH	1.22338	43
3.2.1.55	Ascomycota	Eurotiomycetes	Podzol	arabinofuranosidase	GH62	Hemicellulose	Pathotroph	Animal Pathogen	Probable	Microfungus	GH	1.22338	43
3.2.1.55	Ascomycota	Eurotiomycetes	Podzol	arabinofuranosidase	GH62	Hemicellulose	Pathotroph	Animal Pathogen	Probable	NULL	GH	1.22338	43
3.2.1.55	Ascomycota	Eurotiomycetes	Podzol	arabinofuranosidase	GH62	Hemicellulose	Pathotroph	Plant Pathogen	Probable	Facultative Yeast	GH	1.22338	43
3.2.1.55	Ascomycota	Eurotiomycetes	Podzol	arabinofuranosidase	GH62	Hemicellulose	Pathotroph	Plant Pathogen	Probable	NULL	GH	1.22338	43
3.2.1.55	Ascomycota	Eurotiomycetes	Podzol	arabinofuranosidase	GH62	Hemicellulose	Saprotroph	Undefined Saprotroph	Probable	Microfungus	GH	1.22338	43
3.2.1.55	Ascomycota	Eurotiomycetes	Podzol	arabinofuranosidase	GH62	Hemicellulose	Symbiotroph	Endophyte	Probable	NULL	GH	1.22338	43
3.2.1.55	Ascomycota	Sordariomycetes	Luvisol	arabinofuranosidase	GH54	Hemicellulose	Pathotroph	Animal Pathogen	Probable	NULL	GH	0.891626	34
3.2.1.55	Ascomycota	Sordariomycetes	Luvisol	arabinofuranosidase	GH54	Hemicellulose	Pathotroph	Endophyte-Fungal Parasite-Plant Pathogen	Probable	NULL	GH	0.891626	34
3.2.1.55	Ascomycota	Sordariomycetes	Luvisol	arabinofuranosidase	GH54	Hemicellulose	Pathotroph	Plant Pathogen	Probable	NULL	GH	0.891626	34
3.2.1.55	Ascomycota	Sordariomycetes	Luvisol	arabinofuranosidase	GH54	Hemicellulose	Symbiotroph	Endophyte	Probable	NULL	GH	0.891626	34
3.2.1.55	Ascomycota	Sordariomycetes	Luvisol	arabinofuranosidase	GH62	Hemicellulose	Pathotroph	Animal Pathogen	Probable	NULL	GH	0.891626	34
3.2.1.55	Ascomycota	Sordariomycetes	Luvisol	arabinofuranosidase	GH62	Hemicellulose	Pathotroph	Endophyte-Fungal Parasite-Plant Pathogen	Probable	NULL	GH	0.891626	34
3.2.1.55	Ascomycota	Sordariomycetes	Luvisol	arabinofuranosidase	GH62	Hemicellulose	Symbiotroph	Endophyte	Probable	NULL	GH	0.891626	34
3.2.1.55	Ascomycota	Sordariomycetes	Phaeozem	arabinofuranosidase	GH54	Hemicellulose	Pathotroph	Animal Pathogen	Probable	NULL	GH	1.13443	43
3.2.1.55	Ascomycota	Sordariomycetes	Phaeozem	arabinofuranosidase	GH54	Hemicellulose	Pathotroph	Endophyte-Fungal Parasite-Plant Pathogen	Probable	NULL	GH	1.13443	43
3.2.1.55	Ascomycota	Sordariomycetes	Phaeozem	arabinofuranosidase	GH54	Hemicellulose	Pathotroph	Plant Pathogen	Probable	NULL	GH	1.13443	43
3.2.1.55	Ascomycota	Sordariomycetes	Phaeozem	arabinofuranosidase	GH54	Hemicellulose	Symbiotroph	Endophyte	Probable	NULL	GH	1.13443	43
3.2.1.55	Ascomycota	Sordariomycetes	Phaeozem	arabinofuranosidase	GH62	Hemicellulose	Pathotroph	Animal Pathogen	Probable	NULL	GH	1.13443	43
3.2.1.55	Ascomycota	Sordariomycetes	Phaeozem	arabinofuranosidase	GH62	Hemicellulose	Pathotroph	Endophyte-Fungal Parasite-Plant Pathogen	Probable	NULL	GH	1.13443	43
3.2.1.55	Ascomycota	Sordariomycetes	Phaeozem	arabinofuranosidase	GH62	Hemicellulose	Symbiotroph	Endophyte	Probable	NULL	GH	1.13443	43
3.2.1.55	Ascomycota	Sordariomycetes	Podzol	arabinofuranosidase	GH54	Hemicellulose	Pathotroph	Animal Pathogen	Probable	NULL	GH	1.22338	63
3.2.1.55	Ascomycota	Sordariomycetes	Podzol	arabinofuranosidase	GH54	Hemicellulose	Pathotroph	Endophyte-Fungal Parasite-Plant Pathogen	Probable	NULL	GH	1.22338	63
3.2.1.55	Ascomycota	Sordariomycetes	Podzol	arabinofuranosidase	GH54	Hemicellulose	Pathotroph	Plant Pathogen	Probable	NULL	GH	1.22338	63
3.2.1.55	Ascomycota	Sordariomycetes	Podzol	arabinofuranosidase	GH54	Hemicellulose	Symbiotroph	Endophyte	Probable	NULL	GH	1.22338	63
3.2.1.55	Ascomycota	Sordariomycetes	Podzol	arabinofuranosidase	GH62	Hemicellulose	Pathotroph	Animal Pathogen	Probable	NULL	GH	1.22338	63
3.2.1.55	Ascomycota	Sordariomycetes	Podzol	arabinofuranosidase	GH62	Hemicellulose	Pathotroph	Endophyte-Fungal Parasite-Plant Pathogen	Probable	NULL	GH	1.22338	63
3.2.1.55	Ascomycota	Sordariomycetes	Podzol	arabinofuranosidase	GH62	Hemicellulose	Symbiotroph	Endophyte	Probable	NULL	GH	1.22338	63
3.2.1.55	Basidiomycota	Agaricomycetes	Luvisol	arabinofuranosidase	GH62	Hemicellulose	Saprotroph	Litter Saprotroph	Highly Probable	Agaricoid	GH	0.891626	42
3.2.1.55	Basidiomycota	Agaricomycetes	Luvisol	arabinofuranosidase	GH62	Hemicellulose	Saprotroph	Undefined Saprotroph	Probable	NULL	GH	0.891626	42
3.2.1.55	Basidiomycota	Agaricomycetes	Phaeozem	arabinofuranosidase	GH62	Hemicellulose	Saprotroph	Litter Saprotroph	Highly Probable	Agaricoid	GH	1.13443	60
3.2.1.55	Basidiomycota	Agaricomycetes	Phaeozem	arabinofuranosidase	GH62	Hemicellulose	Saprotroph	Undefined Saprotroph	Probable	NULL	GH	1.13443	60
3.2.1.55	Basidiomycota	Agaricomycetes	Podzol	arabinofuranosidase	GH62	Hemicellulose	Saprotroph	Litter Saprotroph	Highly Probable	Agaricoid	GH	1.22338	48
3.2.1.55	Basidiomycota	Agaricomycetes	Podzol	arabinofuranosidase	GH62	Hemicellulose	Saprotroph	Undefined Saprotroph	Probable	NULL	GH	1.22338	48
3.2.1.58	Ascomycota	Dothideomycetes	Luvisol	exo-glucanase	GH5	Cellulose	Pathotroph	Plant Pathogen	Probable	NULL	GH	1.04514	55
3.2.1.58	Ascomycota	Dothideomycetes	Luvisol	exo-glucanase	GH55	Cellulose	Pathotroph	Plant Pathogen	Probable	NULL	GH	1.04514	55
3.2.1.58	Ascomycota	Dothideomycetes	Phaeozem	exo-glucanase	GH5	Cellulose	Pathotroph	Plant Pathogen	Probable	NULL	GH	1.03665	42
3.2.1.58	Ascomycota	Dothideomycetes	Phaeozem	exo-glucanase	GH55	Cellulose	Pathotroph	Plant Pathogen	Probable	NULL	GH	1.03665	42
3.2.1.58	Ascomycota	Dothideomycetes	Podzol	exo-glucanase	GH5	Cellulose	Pathotroph	Plant Pathogen	Probable	NULL	GH	1.0525	84
3.2.1.58	Ascomycota	Dothideomycetes	Podzol	exo-glucanase	GH55	Cellulose	Pathotroph	Plant Pathogen	Probable	NULL	GH	1.0525	84
3.2.1.58	Ascomycota	Eurotiomycetes	Luvisol	exo-glucanase	GH5	Cellulose	Pathotroph	Animal Pathogen	Probable	Microfungus	GH	1.04514	41
3.2.1.58	Ascomycota	Eurotiomycetes	Luvisol	exo-glucanase	GH5	Cellulose	Saprotroph	Undefined Saprotroph	Probable	Microfungus	GH	1.04514	41
3.2.1.58	Ascomycota	Eurotiomycetes	Luvisol	exo-glucanase	GH55	Cellulose	Pathotroph	Animal Pathogen	Probable	Microfungus	GH	1.04514	41
3.2.1.58	Ascomycota	Eurotiomycetes	Luvisol	exo-glucanase	GH55	Cellulose	Pathotroph	Animal Pathogen	Probable	NULL	GH	1.04514	41
3.2.1.58	Ascomycota	Eurotiomycetes	Luvisol	exo-glucanase	GH55	Cellulose	Pathotroph	Plant Pathogen	Probable	Facultative Yeast	GH	1.04514	41
3.2.1.58	Ascomycota	Eurotiomycetes	Luvisol	exo-glucanase	GH55	Cellulose	Pathotroph	Plant Pathogen	Probable	NULL	GH	1.04514	41
3.2.1.58	Ascomycota	Eurotiomycetes	Luvisol	exo-glucanase	GH55	Cellulose	Saprotroph	Undefined Saprotroph	Probable	Microfungus	GH	1.04514	41
3.2.1.58	Ascomycota	Eurotiomycetes	Luvisol	exo-glucanase	GH55	Cellulose	Symbiotroph	Endophyte	Probable	NULL	GH	1.04514	41
3.2.1.58	Ascomycota	Eurotiomycetes	Phaeozem	exo-glucanase	GH5	Cellulose	Pathotroph	Animal Pathogen	Probable	Microfungus	GH	1.03665	34
3.2.1.58	Ascomycota	Eurotiomycetes	Phaeozem	exo-glucanase	GH5	Cellulose	Saprotroph	Undefined Saprotroph	Probable	Microfungus	GH	1.03665	34
3.2.1.58	Ascomycota	Eurotiomycetes	Phaeozem	exo-glucanase	GH55	Cellulose	Pathotroph	Animal Pathogen	Probable	Microfungus	GH	1.03665	34
3.2.1.58	Ascomycota	Eurotiomycetes	Phaeozem	exo-glucanase	GH55	Cellulose	Pathotroph	Animal Pathogen	Probable	NULL	GH	1.03665	34
3.2.1.58	Ascomycota	Eurotiomycetes	Phaeozem	exo-glucanase	GH55	Cellulose	Pathotroph	Plant Pathogen	Probable	Facultative Yeast	GH	1.03665	34
3.2.1.58	Ascomycota	Eurotiomycetes	Phaeozem	exo-glucanase	GH55	Cellulose	Pathotroph	Plant Pathogen	Probable	NULL	GH	1.03665	34
3.2.1.58	Ascomycota	Eurotiomycetes	Phaeozem	exo-glucanase	GH55	Cellulose	Saprotroph	Undefined Saprotroph	Probable	Microfungus	GH	1.03665	34
3.2.1.58	Ascomycota	Eurotiomycetes	Phaeozem	exo-glucanase	GH55	Cellulose	Symbiotroph	Endophyte	Probable	NULL	GH	1.03665	34
3.2.1.58	Ascomycota	Eurotiomycetes	Podzol	exo-glucanase	GH5	Cellulose	Pathotroph	Animal Pathogen	Probable	Microfungus	GH	1.0525	62
3.2.1.58	Ascomycota	Eurotiomycetes	Podzol	exo-glucanase	GH5	Cellulose	Saprotroph	Undefined Saprotroph	Probable	Microfungus	GH	1.0525	62
3.2.1.58	Ascomycota	Eurotiomycetes	Podzol	exo-glucanase	GH55	Cellulose	Pathotroph	Animal Pathogen	Probable	Microfungus	GH	1.0525	62
3.2.1.58	Ascomycota	Eurotiomycetes	Podzol	exo-glucanase	GH55	Cellulose	Pathotroph	Animal Pathogen	Probable	NULL	GH	1.0525	62
3.2.1.58	Ascomycota	Eurotiomycetes	Podzol	exo-glucanase	GH55	Cellulose	Pathotroph	Plant Pathogen	Probable	Facultative Yeast	GH	1.0525	62
3.2.1.58	Ascomycota	Eurotiomycetes	Podzol	exo-glucanase	GH55	Cellulose	Pathotroph	Plant Pathogen	Probable	NULL	GH	1.0525	62
3.2.1.58	Ascomycota	Eurotiomycetes	Podzol	exo-glucanase	GH55	Cellulose	Saprotroph	Undefined Saprotroph	Probable	Microfungus	GH	1.0525	62
3.2.1.58	Ascomycota	Eurotiomycetes	Podzol	exo-glucanase	GH55	Cellulose	Symbiotroph	Endophyte	Probable	NULL	GH	1.0525	62
3.2.1.58	Ascomycota	Pichiomycetes	Luvisol	exo-glucanase	GH5	Cellulose	Pathotroph	Animal Pathogen	Probable	NULL	GH	1.04514	7
3.2.1.58	Ascomycota	Saccharomycetes	Luvisol	exo-glucanase	GH5	Cellulose	Pathotroph	Animal Pathogen	Probable	NULL	GH	1.04514	4
3.2.1.58	Ascomycota	Sordariomycetes	Luvisol	exo-glucanase	GH55	Cellulose	Pathotroph	Animal Pathogen	Probable	NULL	GH	1.04514	42
3.2.1.58	Ascomycota	Sordariomycetes	Luvisol	exo-glucanase	GH55	Cellulose	Pathotroph	Endophyte-Fungal Parasite-Plant Pathogen	Probable	NULL	GH	1.04514	42
3.2.1.58	Ascomycota	Sordariomycetes	Luvisol	exo-glucanase	GH55	Cellulose	Symbiotroph	Endophyte	Probable	NULL	GH	1.04514	42
3.2.1.58	Ascomycota	Sordariomycetes	Phaeozem	exo-glucanase	GH55	Cellulose	Pathotroph	Animal Pathogen	Probable	NULL	GH	1.03665	33
3.2.1.58	Ascomycota	Sordariomycetes	Phaeozem	exo-glucanase	GH55	Cellulose	Pathotroph	Endophyte-Fungal Parasite-Plant Pathogen	Probable	NULL	GH	1.03665	33
3.2.1.58	Ascomycota	Sordariomycetes	Phaeozem	exo-glucanase	GH55	Cellulose	Symbiotroph	Endophyte	Probable	NULL	GH	1.03665	33
3.2.1.58	Ascomycota	Sordariomycetes	Podzol	exo-glucanase	GH55	Cellulose	Pathotroph	Animal Pathogen	Probable	NULL	GH	1.0525	68
3.2.1.58	Ascomycota	Sordariomycetes	Podzol	exo-glucanase	GH55	Cellulose	Pathotroph	Endophyte-Fungal Parasite-Plant Pathogen	Probable	NULL	GH	1.0525	68
3.2.1.58	Ascomycota	Sordariomycetes	Podzol	exo-glucanase	GH55	Cellulose	Symbiotroph	Endophyte	Probable	NULL	GH	1.0525	68
3.2.1.59	Ascomycota	Eurotiomycetes	Podzol	endo-glucanase	GH71	Cellulose	Pathotroph	Animal Pathogen	Probable	Microfungus	GH	1	2
3.2.1.59	Ascomycota	Eurotiomycetes	Podzol	endo-glucanase	GH71	Cellulose	Pathotroph	Animal Pathogen	Probable	NULL	GH	1	2
3.2.1.59	Ascomycota	Eurotiomycetes	Podzol	endo-glucanase	GH71	Cellulose	Saprotroph	Undefined Saprotroph	Probable	Microfungus	GH	1	2
3.2.1.6	Ascomycota	Dothideomycetes	Phaeozem	endo-glucanase	GH16	Cellulose	Pathotroph	Plant Pathogen	Probable	NULL	GH	0.435323	1
3.2.1.6	Ascomycota	Eurotiomycetes	Luvisol	endo-glucanase	GH16	Cellulose	Pathotroph	Animal Pathogen	Probable	NULL	GH	0.111562	4
3.2.1.6	Ascomycota	Eurotiomycetes	Podzol	endo-glucanase	GH16	Cellulose	Pathotroph	Animal Pathogen	Probable	NULL	GH	0.0432633	7
3.2.1.6	Ascomycota	Sordariomycetes	Luvisol	endo-glucanase	GH16	Cellulose	Pathotroph	Animal Pathogen	Probable	NULL	GH	0.111562	1
3.2.1.6	Ascomycota	Sordariomycetes	Luvisol	endo-glucanase	GH16	Cellulose	Pathotroph	Endophyte-Fungal Parasite-Plant Pathogen	Probable	NULL	GH	0.111562	1
3.2.1.6	Ascomycota	Sordariomycetes	Luvisol	endo-glucanase	GH16	Cellulose	Symbiotroph	Endophyte	Probable	NULL	GH	1.375	1
3.2.1.6	Ascomycota	Sordariomycetes	Podzol	endo-glucanase	GH16	Cellulose	Pathotroph	Animal Pathogen	Probable	NULL	GH	0.0432633	1
3.2.1.6	Ascomycota	Sordariomycetes	Podzol	endo-glucanase	GH16	Cellulose	Pathotroph	Endophyte-Fungal Parasite-Plant Pathogen	Probable	NULL	GH	0.0432633	1
3.2.1.6	Ascomycota	Sordariomycetes	Podzol	endo-glucanase	GH16	Cellulose	Symbiotroph	Endophyte	Probable	NULL	GH	0.0945946	1
3.2.1.67	Ascomycota	Eurotiomycetes	Luvisol	exo-galacturonase	GH28	Pectin	Pathotroph	Animal Pathogen	Probable	Microfungus	GH	0.778626	18
3.2.1.67	Ascomycota	Eurotiomycetes	Luvisol	exo-galacturonase	GH28	Pectin	Saprotroph	Undefined Saprotroph	Probable	Microfungus	GH	0.778626	18
3.2.1.67	Ascomycota	Eurotiomycetes	Phaeozem	exo-galacturonase	GH28	Pectin	Pathotroph	Animal Pathogen	Probable	Microfungus	GH	1.08955	13
3.2.1.67	Ascomycota	Eurotiomycetes	Phaeozem	exo-galacturonase	GH28	Pectin	Saprotroph	Undefined Saprotroph	Probable	Microfungus	GH	1.08955	13
3.2.1.67	Ascomycota	Eurotiomycetes	Podzol	exo-galacturonase	GH28	Pectin	Pathotroph	Animal Pathogen	Probable	Microfungus	GH	0.992593	15
3.2.1.67	Ascomycota	Eurotiomycetes	Podzol	exo-galacturonase	GH28	Pectin	Saprotroph	Undefined Saprotroph	Probable	Microfungus	GH	0.992593	15
3.2.1.67	Ascomycota	Sordariomycetes	Luvisol	exo-galacturonase	GH28	Pectin	Pathotroph	Plant Pathogen	Probable	NULL	GH	0.778626	20
3.2.1.67	Ascomycota	Sordariomycetes	Phaeozem	exo-galacturonase	GH28	Pectin	Pathotroph	Plant Pathogen	Probable	NULL	GH	1.08955	21
3.2.1.67	Ascomycota	Sordariomycetes	Podzol	exo-galacturonase	GH28	Pectin	Pathotroph	Plant Pathogen	Probable	NULL	GH	0.992593	29
3.2.1.75	Ascomycota	Eurotiomycetes	Luvisol	endo-glucanase	GH30	Cellulose	Pathotroph	Animal Pathogen	Probable	Microfungus	GH	0.85	2
3.2.1.75	Ascomycota	Eurotiomycetes	Luvisol	endo-glucanase	GH30	Cellulose	Saprotroph	Undefined Saprotroph	Probable	Microfungus	GH	0.85	2
3.2.1.75	Ascomycota	Eurotiomycetes	Luvisol	endo-glucanase	GH5	Cellulose	Pathotroph	Animal Pathogen	Probable	Microfungus	GH	0.0540254	2
3.2.1.75	Ascomycota	Eurotiomycetes	Luvisol	endo-glucanase	GH5	Cellulose	Saprotroph	Undefined Saprotroph	Probable	Microfungus	GH	0.0705394	2
3.2.1.75	Ascomycota	Eurotiomycetes	Phaeozem	endo-glucanase	GH30	Cellulose	Pathotroph	Animal Pathogen	Probable	Microfungus	GH	0.909091	5
3.2.1.75	Ascomycota	Eurotiomycetes	Phaeozem	endo-glucanase	GH30	Cellulose	Saprotroph	Undefined Saprotroph	Probable	Microfungus	GH	0.909091	5
3.2.1.75	Ascomycota	Eurotiomycetes	Phaeozem	endo-glucanase	GH5	Cellulose	Pathotroph	Animal Pathogen	Probable	Microfungus	GH	0.0511945	5
3.2.1.75	Ascomycota	Eurotiomycetes	Phaeozem	endo-glucanase	GH5	Cellulose	Saprotroph	Undefined Saprotroph	Probable	Microfungus	GH	0.0670017	5
3.2.1.75	Ascomycota	Eurotiomycetes	Podzol	endo-glucanase	GH30	Cellulose	Pathotroph	Animal Pathogen	Probable	Microfungus	GH	0.821429	5
3.2.1.75	Ascomycota	Eurotiomycetes	Podzol	endo-glucanase	GH30	Cellulose	Saprotroph	Undefined Saprotroph	Probable	Microfungus	GH	0.821429	5
3.2.1.75	Ascomycota	Eurotiomycetes	Podzol	endo-glucanase	GH5	Cellulose	Pathotroph	Animal Pathogen	Probable	Microfungus	GH	0.0780543	5
3.2.1.75	Ascomycota	Eurotiomycetes	Podzol	endo-glucanase	GH5	Cellulose	Saprotroph	Undefined Saprotroph	Probable	Microfungus	GH	0.100877	5
3.2.1.75	Ascomycota	Sordariomycetes	Luvisol	endo-glucanase	GH30	Cellulose	Pathotroph	Animal Pathogen	Probable	NULL	GH	0.85	10
3.2.1.75	Ascomycota	Sordariomycetes	Luvisol	endo-glucanase	GH30	Cellulose	Pathotroph	Endophyte-Fungal Parasite-Plant Pathogen	Probable	NULL	GH	0.85	10
3.2.1.75	Ascomycota	Sordariomycetes	Luvisol	endo-glucanase	GH30	Cellulose	Symbiotroph	Endophyte	Probable	NULL	GH	0.85	10
3.2.1.75	Ascomycota	Sordariomycetes	Luvisol	endo-glucanase	GH5	Cellulose	Pathotroph	Animal Pathogen	Probable	NULL	GH	0.0540254	10
3.2.1.75	Ascomycota	Sordariomycetes	Luvisol	endo-glucanase	GH5	Cellulose	Pathotroph	Endophyte-Fungal Parasite-Plant Pathogen	Probable	NULL	GH	0.0540254	10
3.2.1.75	Ascomycota	Sordariomycetes	Luvisol	endo-glucanase	GH5	Cellulose	Symbiotroph	Endophyte	Probable	NULL	GH	0.0540254	10
3.2.1.75	Ascomycota	Sordariomycetes	Phaeozem	endo-glucanase	GH30	Cellulose	Pathotroph	Animal Pathogen	Probable	NULL	GH	0.909091	3
3.2.1.75	Ascomycota	Sordariomycetes	Phaeozem	endo-glucanase	GH30	Cellulose	Pathotroph	Endophyte-Fungal Parasite-Plant Pathogen	Probable	NULL	GH	0.909091	3
3.2.1.75	Ascomycota	Sordariomycetes	Phaeozem	endo-glucanase	GH30	Cellulose	Symbiotroph	Endophyte	Probable	NULL	GH	0.909091	3
3.2.1.75	Ascomycota	Sordariomycetes	Phaeozem	endo-glucanase	GH5	Cellulose	Pathotroph	Animal Pathogen	Probable	NULL	GH	0.0511945	3
3.2.1.75	Ascomycota	Sordariomycetes	Phaeozem	endo-glucanase	GH5	Cellulose	Pathotroph	Endophyte-Fungal Parasite-Plant Pathogen	Probable	NULL	GH	0.0511945	3
3.2.1.75	Ascomycota	Sordariomycetes	Phaeozem	endo-glucanase	GH5	Cellulose	Symbiotroph	Endophyte	Probable	NULL	GH	0.0511945	3
3.2.1.75	Ascomycota	Sordariomycetes	Podzol	endo-glucanase	GH30	Cellulose	Pathotroph	Animal Pathogen	Probable	NULL	GH	0.821429	11
3.2.1.75	Ascomycota	Sordariomycetes	Podzol	endo-glucanase	GH30	Cellulose	Pathotroph	Endophyte-Fungal Parasite-Plant Pathogen	Probable	NULL	GH	0.821429	11
3.2.1.75	Ascomycota	Sordariomycetes	Podzol	endo-glucanase	GH30	Cellulose	Symbiotroph	Endophyte	Probable	NULL	GH	0.821429	11
3.2.1.75	Ascomycota	Sordariomycetes	Podzol	endo-glucanase	GH5	Cellulose	Pathotroph	Animal Pathogen	Probable	NULL	GH	0.0780543	11
3.2.1.75	Ascomycota	Sordariomycetes	Podzol	endo-glucanase	GH5	Cellulose	Pathotroph	Endophyte-Fungal Parasite-Plant Pathogen	Probable	NULL	GH	0.0780543	11
3.2.1.75	Ascomycota	Sordariomycetes	Podzol	endo-glucanase	GH5	Cellulose	Symbiotroph	Endophyte	Probable	NULL	GH	0.0780543	11
3.2.1.78	Ascomycota	Dothideomycetes	Luvisol	endo-mannanase	GH26	Hemicellulose	Saprotroph	Undefined Saprotroph	Probable	NULL	GH	1.0355	12
3.2.1.78	Ascomycota	Dothideomycetes	Podzol	endo-mannanase	GH26	Hemicellulose	Saprotroph	Undefined Saprotroph	Probable	NULL	GH	0.892655	13
3.2.1.78	Ascomycota	Eurotiomycetes	Luvisol	endo-mannanase	GH26	Hemicellulose	Pathotroph	Animal Pathogen	Probable	Microfungus	GH	1.0355	6
3.2.1.78	Ascomycota	Eurotiomycetes	Luvisol	endo-mannanase	GH26	Hemicellulose	Saprotroph	Undefined Saprotroph	Probable	Microfungus	GH	1.0355	6
3.2.1.78	Ascomycota	Eurotiomycetes	Luvisol	endo-mannanase	GH5	Hemicellulose	Pathotroph	Animal Pathogen	Probable	Microfungus	GH	1.0355	6
3.2.1.78	Ascomycota	Eurotiomycetes	Luvisol	endo-mannanase	GH5	Hemicellulose	Pathotroph	Animal Pathogen	Probable	NULL	GH	1.0355	6
3.2.1.78	Ascomycota	Eurotiomycetes	Luvisol	endo-mannanase	GH5	Hemicellulose	Pathotroph	Plant Pathogen	Probable	Facultative Yeast	GH	1.0355	6
3.2.1.78	Ascomycota	Eurotiomycetes	Luvisol	endo-mannanase	GH5	Hemicellulose	Pathotroph	Plant Pathogen	Probable	NULL	GH	1.0355	6
3.2.1.78	Ascomycota	Eurotiomycetes	Luvisol	endo-mannanase	GH5	Hemicellulose	Saprotroph	Undefined Saprotroph	Probable	Microfungus	GH	1.0355	6
3.2.1.78	Ascomycota	Eurotiomycetes	Luvisol	endo-mannanase	GH5	Hemicellulose	Symbiotroph	Endophyte	Probable	NULL	GH	1.0355	6
3.2.1.78	Ascomycota	Eurotiomycetes	Phaeozem	endo-mannanase	GH26	Hemicellulose	Pathotroph	Animal Pathogen	Probable	Microfungus	GH	0.936842	7
3.2.1.78	Ascomycota	Eurotiomycetes	Phaeozem	endo-mannanase	GH26	Hemicellulose	Saprotroph	Undefined Saprotroph	Probable	Microfungus	GH	0.936842	7
3.2.1.78	Ascomycota	Eurotiomycetes	Phaeozem	endo-mannanase	GH5	Hemicellulose	Pathotroph	Animal Pathogen	Probable	Microfungus	GH	0.936842	7
3.2.1.78	Ascomycota	Eurotiomycetes	Phaeozem	endo-mannanase	GH5	Hemicellulose	Pathotroph	Animal Pathogen	Probable	NULL	GH	0.936842	7
3.2.1.78	Ascomycota	Eurotiomycetes	Phaeozem	endo-mannanase	GH5	Hemicellulose	Pathotroph	Plant Pathogen	Probable	Facultative Yeast	GH	0.936842	7
3.2.1.78	Ascomycota	Eurotiomycetes	Phaeozem	endo-mannanase	GH5	Hemicellulose	Pathotroph	Plant Pathogen	Probable	NULL	GH	0.936842	7
3.2.1.78	Ascomycota	Eurotiomycetes	Phaeozem	endo-mannanase	GH5	Hemicellulose	Saprotroph	Undefined Saprotroph	Probable	Microfungus	GH	0.936842	7
3.2.1.78	Ascomycota	Eurotiomycetes	Phaeozem	endo-mannanase	GH5	Hemicellulose	Symbiotroph	Endophyte	Probable	NULL	GH	0.936842	7
3.2.1.78	Ascomycota	Eurotiomycetes	Podzol	endo-mannanase	GH26	Hemicellulose	Pathotroph	Animal Pathogen	Probable	Microfungus	GH	0.892655	8
3.2.1.78	Ascomycota	Eurotiomycetes	Podzol	endo-mannanase	GH26	Hemicellulose	Saprotroph	Undefined Saprotroph	Probable	Microfungus	GH	0.892655	8
3.2.1.78	Ascomycota	Eurotiomycetes	Podzol	endo-mannanase	GH5	Hemicellulose	Pathotroph	Animal Pathogen	Probable	Microfungus	GH	0.892655	8
3.2.1.78	Ascomycota	Eurotiomycetes	Podzol	endo-mannanase	GH5	Hemicellulose	Pathotroph	Animal Pathogen	Probable	NULL	GH	0.892655	8
3.2.1.78	Ascomycota	Eurotiomycetes	Podzol	endo-mannanase	GH5	Hemicellulose	Pathotroph	Plant Pathogen	Probable	Facultative Yeast	GH	0.892655	8
3.2.1.78	Ascomycota	Eurotiomycetes	Podzol	endo-mannanase	GH5	Hemicellulose	Pathotroph	Plant Pathogen	Probable	NULL	GH	0.892655	8
3.2.1.78	Ascomycota	Eurotiomycetes	Podzol	endo-mannanase	GH5	Hemicellulose	Saprotroph	Undefined Saprotroph	Probable	Microfungus	GH	0.892655	8
3.2.1.78	Ascomycota	Eurotiomycetes	Podzol	endo-mannanase	GH5	Hemicellulose	Symbiotroph	Endophyte	Probable	NULL	GH	0.892655	8
3.2.1.78	Ascomycota	Sordariomycetes	Luvisol	endo-mannanase	GH5	Hemicellulose	Pathotroph	Animal Pathogen	Probable	NULL	GH	1.0355	18
3.2.1.78	Ascomycota	Sordariomycetes	Luvisol	endo-mannanase	GH5	Hemicellulose	Pathotroph	Endophyte-Fungal Parasite-Plant Pathogen	Probable	NULL	GH	1.0355	18
3.2.1.78	Ascomycota	Sordariomycetes	Luvisol	endo-mannanase	GH5	Hemicellulose	Symbiotroph	Endophyte	Probable	NULL	GH	1.0355	18
3.2.1.78	Ascomycota	Sordariomycetes	Phaeozem	endo-mannanase	GH5	Hemicellulose	Pathotroph	Animal Pathogen	Probable	NULL	GH	0.936842	16
3.2.1.78	Ascomycota	Sordariomycetes	Phaeozem	endo-mannanase	GH5	Hemicellulose	Pathotroph	Endophyte-Fungal Parasite-Plant Pathogen	Probable	NULL	GH	0.936842	16
3.2.1.78	Ascomycota	Sordariomycetes	Phaeozem	endo-mannanase	GH5	Hemicellulose	Symbiotroph	Endophyte	Probable	NULL	GH	0.936842	16
3.2.1.78	Ascomycota	Sordariomycetes	Podzol	endo-mannanase	GH5	Hemicellulose	Pathotroph	Animal Pathogen	Probable	NULL	GH	0.892655	34
3.2.1.78	Ascomycota	Sordariomycetes	Podzol	endo-mannanase	GH5	Hemicellulose	Pathotroph	Endophyte-Fungal Parasite-Plant Pathogen	Probable	NULL	GH	0.892655	34
3.2.1.78	Ascomycota	Sordariomycetes	Podzol	endo-mannanase	GH5	Hemicellulose	Symbiotroph	Endophyte	Probable	NULL	GH	0.892655	34
3.2.1.78	Basidiomycota	Agaricomycetes	Luvisol	endo-mannanase	GH5	Hemicellulose	Saprotroph	Soil Saprotroph	Probable	Agaricoid	GH	1.0355	45
3.2.1.78	Basidiomycota	Agaricomycetes	Luvisol	endo-mannanase	GH5	Hemicellulose	Saprotroph	Undefined Saprotroph	Probable	Agaricoid	GH	1.0355	45
3.2.1.78	Basidiomycota	Agaricomycetes	Phaeozem	endo-mannanase	GH5	Hemicellulose	Saprotroph	Soil Saprotroph	Probable	Agaricoid	GH	0.936842	41
3.2.1.78	Basidiomycota	Agaricomycetes	Phaeozem	endo-mannanase	GH5	Hemicellulose	Saprotroph	Undefined Saprotroph	Probable	Agaricoid	GH	0.936842	41
3.2.1.78	Basidiomycota	Agaricomycetes	Podzol	endo-mannanase	GH5	Hemicellulose	Saprotroph	Soil Saprotroph	Probable	Agaricoid	GH	0.892655	35
3.2.1.78	Basidiomycota	Agaricomycetes	Podzol	endo-mannanase	GH5	Hemicellulose	Saprotroph	Undefined Saprotroph	Probable	Agaricoid	GH	0.892655	35
3.2.1.8	Ascomycota	Dothideomycetes	Luvisol	xylanase	GH11	Hemicellulose	Pathotroph	Plant Pathogen	Probable	Microfungus	GH	0.983213	26
3.2.1.8	Ascomycota	Dothideomycetes	Luvisol	xylanase	GH11	Hemicellulose	Pathotroph	Plant Pathogen	Probable	NULL	GH	0.983213	26
3.2.1.8	Ascomycota	Dothideomycetes	Phaeozem	xylanase	GH11	Hemicellulose	Pathotroph	Plant Pathogen	Probable	Microfungus	GH	1.05239	33
3.2.1.8	Ascomycota	Dothideomycetes	Phaeozem	xylanase	GH11	Hemicellulose	Pathotroph	Plant Pathogen	Probable	NULL	GH	1.05239	33
3.2.1.8	Ascomycota	Dothideomycetes	Podzol	xylanase	GH11	Hemicellulose	Pathotroph	Plant Pathogen	Probable	Microfungus	GH	1.09524	38
3.2.1.8	Ascomycota	Dothideomycetes	Podzol	xylanase	GH11	Hemicellulose	Pathotroph	Plant Pathogen	Probable	NULL	GH	1.09524	38
3.2.1.8	Ascomycota	Eurotiomycetes	Luvisol	xylanase	GH10	Hemicellulose	Pathotroph	Animal Pathogen	Probable	Microfungus	GH	0.983213	10
3.2.1.8	Ascomycota	Eurotiomycetes	Luvisol	xylanase	GH10	Hemicellulose	Pathotroph	Animal Pathogen	Probable	NULL	GH	0.983213	10
3.2.1.8	Ascomycota	Eurotiomycetes	Luvisol	xylanase	GH10	Hemicellulose	Pathotroph	Plant Pathogen	Probable	Facultative Yeast	GH	0.983213	10
3.2.1.8	Ascomycota	Eurotiomycetes	Luvisol	xylanase	GH10	Hemicellulose	Pathotroph	Plant Pathogen	Probable	NULL	GH	0.983213	10
3.2.1.8	Ascomycota	Eurotiomycetes	Luvisol	xylanase	GH10	Hemicellulose	Saprotroph	Undefined Saprotroph	Probable	Microfungus	GH	0.983213	10
3.2.1.8	Ascomycota	Eurotiomycetes	Luvisol	xylanase	GH10	Hemicellulose	Symbiotroph	Endophyte	Probable	NULL	GH	0.983213	10
3.2.1.8	Ascomycota	Eurotiomycetes	Luvisol	xylanase	GH11	Hemicellulose	Pathotroph	Animal Pathogen	Probable	Microfungus	GH	0.983213	10
3.2.1.8	Ascomycota	Eurotiomycetes	Luvisol	xylanase	GH11	Hemicellulose	Pathotroph	Animal Pathogen	Probable	NULL	GH	0.983213	10
3.2.1.8	Ascomycota	Eurotiomycetes	Luvisol	xylanase	GH11	Hemicellulose	Pathotroph	Plant Pathogen	Probable	Facultative Yeast	GH	0.983213	10
3.2.1.8	Ascomycota	Eurotiomycetes	Luvisol	xylanase	GH11	Hemicellulose	Pathotroph	Plant Pathogen	Probable	NULL	GH	0.983213	10
3.2.1.8	Ascomycota	Eurotiomycetes	Luvisol	xylanase	GH11	Hemicellulose	Saprotroph	Undefined Saprotroph	Probable	Microfungus	GH	0.983213	10
3.2.1.8	Ascomycota	Eurotiomycetes	Luvisol	xylanase	GH11	Hemicellulose	Symbiotroph	Endophyte	Probable	NULL	GH	0.983213	10
3.2.1.8	Ascomycota	Eurotiomycetes	Luvisol	xylanase	GH3	Hemicellulose	Pathotroph	Animal Pathogen	Probable	Microfungus	GH	2.14211	10
3.2.1.8	Ascomycota	Eurotiomycetes	Luvisol	xylanase	GH3	Hemicellulose	Saprotroph	Undefined Saprotroph	Probable	Microfungus	GH	1.48551	10
3.2.1.8	Ascomycota	Eurotiomycetes	Luvisol	xylanase	GH30	Hemicellulose	Pathotroph	Animal Pathogen	Probable	NULL	GH	0.983213	10
3.2.1.8	Ascomycota	Eurotiomycetes	Phaeozem	xylanase	GH10	Hemicellulose	Pathotroph	Animal Pathogen	Probable	Microfungus	GH	1.05239	14
3.2.1.8	Ascomycota	Eurotiomycetes	Phaeozem	xylanase	GH10	Hemicellulose	Pathotroph	Animal Pathogen	Probable	NULL	GH	1.05239	14
3.2.1.8	Ascomycota	Eurotiomycetes	Phaeozem	xylanase	GH10	Hemicellulose	Pathotroph	Plant Pathogen	Probable	Facultative Yeast	GH	1.05239	14
3.2.1.8	Ascomycota	Eurotiomycetes	Phaeozem	xylanase	GH10	Hemicellulose	Pathotroph	Plant Pathogen	Probable	NULL	GH	1.05239	14
3.2.1.8	Ascomycota	Eurotiomycetes	Phaeozem	xylanase	GH10	Hemicellulose	Saprotroph	Undefined Saprotroph	Probable	Microfungus	GH	1.05239	14
3.2.1.8	Ascomycota	Eurotiomycetes	Phaeozem	xylanase	GH10	Hemicellulose	Symbiotroph	Endophyte	Probable	NULL	GH	1.05239	14
3.2.1.8	Ascomycota	Eurotiomycetes	Phaeozem	xylanase	GH11	Hemicellulose	Pathotroph	Animal Pathogen	Probable	Microfungus	GH	1.05239	14
3.2.1.8	Ascomycota	Eurotiomycetes	Phaeozem	xylanase	GH11	Hemicellulose	Pathotroph	Animal Pathogen	Probable	NULL	GH	1.05239	14
3.2.1.8	Ascomycota	Eurotiomycetes	Phaeozem	xylanase	GH11	Hemicellulose	Pathotroph	Plant Pathogen	Probable	Facultative Yeast	GH	1.05239	14
3.2.1.8	Ascomycota	Eurotiomycetes	Phaeozem	xylanase	GH11	Hemicellulose	Pathotroph	Plant Pathogen	Probable	NULL	GH	1.05239	14
3.2.1.8	Ascomycota	Eurotiomycetes	Phaeozem	xylanase	GH11	Hemicellulose	Saprotroph	Undefined Saprotroph	Probable	Microfungus	GH	1.05239	14
3.2.1.8	Ascomycota	Eurotiomycetes	Phaeozem	xylanase	GH11	Hemicellulose	Symbiotroph	Endophyte	Probable	NULL	GH	1.05239	14
3.2.1.8	Ascomycota	Eurotiomycetes	Phaeozem	xylanase	GH3	Hemicellulose	Pathotroph	Animal Pathogen	Probable	Microfungus	GH	2.56952	14
3.2.1.8	Ascomycota	Eurotiomycetes	Phaeozem	xylanase	GH3	Hemicellulose	Saprotroph	Undefined Saprotroph	Probable	Microfungus	GH	1.66787	14
3.2.1.8	Ascomycota	Eurotiomycetes	Phaeozem	xylanase	GH30	Hemicellulose	Pathotroph	Animal Pathogen	Probable	NULL	GH	1.05239	14
3.2.1.8	Ascomycota	Eurotiomycetes	Podzol	xylanase	GH10	Hemicellulose	Pathotroph	Animal Pathogen	Probable	Microfungus	GH	1.09524	13
3.2.1.8	Ascomycota	Eurotiomycetes	Podzol	xylanase	GH10	Hemicellulose	Pathotroph	Animal Pathogen	Probable	NULL	GH	1.09524	13
3.2.1.8	Ascomycota	Eurotiomycetes	Podzol	xylanase	GH10	Hemicellulose	Pathotroph	Plant Pathogen	Probable	Facultative Yeast	GH	1.09524	13
3.2.1.8	Ascomycota	Eurotiomycetes	Podzol	xylanase	GH10	Hemicellulose	Pathotroph	Plant Pathogen	Probable	NULL	GH	1.09524	13
3.2.1.8	Ascomycota	Eurotiomycetes	Podzol	xylanase	GH10	Hemicellulose	Saprotroph	Undefined Saprotroph	Probable	Microfungus	GH	1.09524	13
3.2.1.8	Ascomycota	Eurotiomycetes	Podzol	xylanase	GH10	Hemicellulose	Symbiotroph	Endophyte	Probable	NULL	GH	1.09524	13
3.2.1.8	Ascomycota	Eurotiomycetes	Podzol	xylanase	GH11	Hemicellulose	Pathotroph	Animal Pathogen	Probable	Microfungus	GH	1.09524	13
3.2.1.8	Ascomycota	Eurotiomycetes	Podzol	xylanase	GH11	Hemicellulose	Pathotroph	Animal Pathogen	Probable	NULL	GH	1.09524	13
3.2.1.8	Ascomycota	Eurotiomycetes	Podzol	xylanase	GH11	Hemicellulose	Pathotroph	Plant Pathogen	Probable	Facultative Yeast	GH	1.09524	13
3.2.1.8	Ascomycota	Eurotiomycetes	Podzol	xylanase	GH11	Hemicellulose	Pathotroph	Plant Pathogen	Probable	NULL	GH	1.09524	13
3.2.1.8	Ascomycota	Eurotiomycetes	Podzol	xylanase	GH11	Hemicellulose	Saprotroph	Undefined Saprotroph	Probable	Microfungus	GH	1.09524	13
3.2.1.8	Ascomycota	Eurotiomycetes	Podzol	xylanase	GH11	Hemicellulose	Symbiotroph	Endophyte	Probable	NULL	GH	1.09524	13
3.2.1.8	Ascomycota	Eurotiomycetes	Podzol	xylanase	GH3	Hemicellulose	Pathotroph	Animal Pathogen	Probable	Microfungus	GH	2.32461	13
3.2.1.8	Ascomycota	Eurotiomycetes	Podzol	xylanase	GH3	Hemicellulose	Saprotroph	Undefined Saprotroph	Probable	Microfungus	GH	1.63598	13
3.2.1.8	Ascomycota	Eurotiomycetes	Podzol	xylanase	GH30	Hemicellulose	Pathotroph	Animal Pathogen	Probable	NULL	GH	1.09524	13
3.2.1.8	Ascomycota	Leotiomycetes	Phaeozem	xylanase	GH11	Hemicellulose	Pathotroph	Plant Pathogen	Probable	Microfungus	GH	1.05239	5
3.2.1.8	Ascomycota	Leotiomycetes	Podzol	xylanase	GH11	Hemicellulose	Pathotroph	Plant Pathogen	Probable	Microfungus	GH	1.09524	9
3.2.1.8	Ascomycota	Sordariomycetes	Luvisol	xylanase	GH10	Hemicellulose	Pathotroph	Animal Pathogen	Probable	NULL	GH	0.983213	78
3.2.1.8	Ascomycota	Sordariomycetes	Luvisol	xylanase	GH10	Hemicellulose	Pathotroph	Endophyte-Fungal Parasite-Plant Pathogen	Probable	NULL	GH	0.983213	78
3.2.1.8	Ascomycota	Sordariomycetes	Luvisol	xylanase	GH10	Hemicellulose	Pathotroph	Plant Pathogen	Probable	NULL	GH	0.983213	78
3.2.1.8	Ascomycota	Sordariomycetes	Luvisol	xylanase	GH10	Hemicellulose	Symbiotroph	Endophyte	Probable	NULL	GH	0.983213	78
3.2.1.8	Ascomycota	Sordariomycetes	Luvisol	xylanase	GH10	Hemicellulose	Symbiotroph	Plant Pathogen	Probable	Ergot	GH	0.983213	78
3.2.1.8	Ascomycota	Sordariomycetes	Luvisol	xylanase	GH11	Hemicellulose	Pathotroph	Animal Pathogen	Probable	NULL	GH	0.983213	78
3.2.1.8	Ascomycota	Sordariomycetes	Luvisol	xylanase	GH11	Hemicellulose	Pathotroph	Endophyte-Fungal Parasite-Plant Pathogen	Probable	NULL	GH	0.983213	78
3.2.1.8	Ascomycota	Sordariomycetes	Luvisol	xylanase	GH11	Hemicellulose	Pathotroph	Plant Pathogen	Probable	NULL	GH	0.983213	78
3.2.1.8	Ascomycota	Sordariomycetes	Luvisol	xylanase	GH11	Hemicellulose	Symbiotroph	Endophyte	Probable	NULL	GH	0.983213	78
3.2.1.8	Ascomycota	Sordariomycetes	Luvisol	xylanase	GH11	Hemicellulose	Symbiotroph	Plant Pathogen	Probable	Ergot	GH	0.983213	78
3.2.1.8	Ascomycota	Sordariomycetes	Phaeozem	xylanase	GH10	Hemicellulose	Pathotroph	Animal Pathogen	Probable	NULL	GH	1.05239	70
3.2.1.8	Ascomycota	Sordariomycetes	Phaeozem	xylanase	GH10	Hemicellulose	Pathotroph	Endophyte-Fungal Parasite-Plant Pathogen	Probable	NULL	GH	1.05239	70
3.2.1.8	Ascomycota	Sordariomycetes	Phaeozem	xylanase	GH10	Hemicellulose	Pathotroph	Plant Pathogen	Probable	NULL	GH	1.05239	70
3.2.1.8	Ascomycota	Sordariomycetes	Phaeozem	xylanase	GH10	Hemicellulose	Symbiotroph	Endophyte	Probable	NULL	GH	1.05239	70
3.2.1.8	Ascomycota	Sordariomycetes	Phaeozem	xylanase	GH10	Hemicellulose	Symbiotroph	Plant Pathogen	Probable	Ergot	GH	1.05239	70
3.2.1.8	Ascomycota	Sordariomycetes	Phaeozem	xylanase	GH11	Hemicellulose	Pathotroph	Animal Pathogen	Probable	NULL	GH	1.05239	70
3.2.1.8	Ascomycota	Sordariomycetes	Phaeozem	xylanase	GH11	Hemicellulose	Pathotroph	Endophyte-Fungal Parasite-Plant Pathogen	Probable	NULL	GH	1.05239	70
3.2.1.8	Ascomycota	Sordariomycetes	Phaeozem	xylanase	GH11	Hemicellulose	Pathotroph	Plant Pathogen	Probable	NULL	GH	1.05239	70
3.2.1.8	Ascomycota	Sordariomycetes	Phaeozem	xylanase	GH11	Hemicellulose	Symbiotroph	Endophyte	Probable	NULL	GH	1.05239	70
3.2.1.8	Ascomycota	Sordariomycetes	Phaeozem	xylanase	GH11	Hemicellulose	Symbiotroph	Plant Pathogen	Probable	Ergot	GH	1.05239	70
3.2.1.8	Ascomycota	Sordariomycetes	Podzol	xylanase	GH10	Hemicellulose	Pathotroph	Animal Pathogen	Probable	NULL	GH	1.09524	69
3.2.1.8	Ascomycota	Sordariomycetes	Podzol	xylanase	GH10	Hemicellulose	Pathotroph	Endophyte-Fungal Parasite-Plant Pathogen	Probable	NULL	GH	1.09524	69
3.2.1.8	Ascomycota	Sordariomycetes	Podzol	xylanase	GH10	Hemicellulose	Pathotroph	Plant Pathogen	Probable	NULL	GH	1.09524	69
3.2.1.8	Ascomycota	Sordariomycetes	Podzol	xylanase	GH10	Hemicellulose	Symbiotroph	Endophyte	Probable	NULL	GH	1.09524	69
3.2.1.8	Ascomycota	Sordariomycetes	Podzol	xylanase	GH11	Hemicellulose	Pathotroph	Animal Pathogen	Probable	NULL	GH	1.09524	69
3.2.1.8	Ascomycota	Sordariomycetes	Podzol	xylanase	GH11	Hemicellulose	Pathotroph	Endophyte-Fungal Parasite-Plant Pathogen	Probable	NULL	GH	1.09524	69
3.2.1.8	Ascomycota	Sordariomycetes	Podzol	xylanase	GH11	Hemicellulose	Pathotroph	Plant Pathogen	Probable	NULL	GH	1.09524	69
3.2.1.8	Ascomycota	Sordariomycetes	Podzol	xylanase	GH11	Hemicellulose	Symbiotroph	Endophyte	Probable	NULL	GH	1.09524	69
3.2.1.8	Basidiomycota	Agaricomycetes	Luvisol	xylanase	GH10	Hemicellulose	Saprotroph	Soil Saprotroph	Probable	Agaricoid	GH	0.983213	64
3.2.1.8	Basidiomycota	Agaricomycetes	Luvisol	xylanase	GH10	Hemicellulose	Saprotroph	Undefined Saprotroph	Probable	Agaricoid	GH	0.983213	64
3.2.1.8	Basidiomycota	Agaricomycetes	Luvisol	xylanase	GH11	Hemicellulose	Saprotroph	Litter Saprotroph	Highly Probable	Agaricoid	GH	0.983213	64
3.2.1.8	Basidiomycota	Agaricomycetes	Luvisol	xylanase	GH11	Hemicellulose	Saprotroph	Undefined Saprotroph	Probable	NULL	GH	0.983213	64
3.2.1.8	Basidiomycota	Agaricomycetes	Phaeozem	xylanase	GH10	Hemicellulose	Saprotroph	Soil Saprotroph	Probable	Agaricoid	GH	1.05239	56
3.2.1.8	Basidiomycota	Agaricomycetes	Phaeozem	xylanase	GH10	Hemicellulose	Saprotroph	Undefined Saprotroph	Probable	Agaricoid	GH	1.05239	56
3.2.1.8	Basidiomycota	Agaricomycetes	Phaeozem	xylanase	GH11	Hemicellulose	Saprotroph	Litter Saprotroph	Highly Probable	Agaricoid	GH	1.05239	56
3.2.1.8	Basidiomycota	Agaricomycetes	Phaeozem	xylanase	GH11	Hemicellulose	Saprotroph	Undefined Saprotroph	Probable	NULL	GH	1.05239	56
3.2.1.8	Basidiomycota	Agaricomycetes	Podzol	xylanase	GH10	Hemicellulose	Saprotroph	Soil Saprotroph	Probable	Agaricoid	GH	1.09524	45
3.2.1.8	Basidiomycota	Agaricomycetes	Podzol	xylanase	GH10	Hemicellulose	Saprotroph	Undefined Saprotroph	Probable	Agaricoid	GH	1.09524	45
3.2.1.8	Basidiomycota	Agaricomycetes	Podzol	xylanase	GH11	Hemicellulose	Saprotroph	Litter Saprotroph	Highly Probable	Agaricoid	GH	1.09524	45
3.2.1.8	Basidiomycota	Agaricomycetes	Podzol	xylanase	GH11	Hemicellulose	Saprotroph	Undefined Saprotroph	Probable	NULL	GH	1.09524	45
3.2.1.8	Basidiomycota	Tremellomycetes	Phaeozem	xylanase	GH11	Hemicellulose	Pathotroph	Animal Pathogen	Highly Probable	Yeast	GH	1.05239	1
3.2.1.8	Chytridiomycota	Chytridiomycetes	Phaeozem	xylanase	GH11	Hemicellulose	Saprotroph	Undefined Saprotroph	Probable	NULL	GH	1.05239	3
3.2.1.8	Chytridiomycota	Chytridiomycetes	Podzol	xylanase	GH11	Hemicellulose	Saprotroph	Undefined Saprotroph	Probable	NULL	GH	1.09524	2
3.2.1.8	Mucoromycota	Mucoromycetes	Luvisol	xylanase	GH10	Hemicellulose	Pathotroph	Plant Pathogen	Probable	NULL	GH	0.983213	1
3.2.1.8	Mucoromycota	Mucoromycetes	Luvisol	xylanase	GH11	Hemicellulose	Pathotroph	Plant Pathogen	Probable	NULL	GH	0.983213	1
3.2.1.8	Mucoromycota	Mucoromycetes	Phaeozem	xylanase	GH10	Hemicellulose	Pathotroph	Plant Pathogen	Probable	NULL	GH	1.05239	1
3.2.1.8	Mucoromycota	Mucoromycetes	Phaeozem	xylanase	GH11	Hemicellulose	Pathotroph	Plant Pathogen	Probable	NULL	GH	1.05239	1
3.2.1.89	Ascomycota	Eurotiomycetes	Phaeozem	endo-galactanase	GH53	Hemicellulose	Pathotroph	Animal Pathogen	Probable	Microfungus	GH	1.11111	5
3.2.1.89	Ascomycota	Eurotiomycetes	Phaeozem	endo-galactanase	GH53	Hemicellulose	Pathotroph	Animal Pathogen	Probable	NULL	GH	1.11111	5
3.2.1.89	Ascomycota	Eurotiomycetes	Phaeozem	endo-galactanase	GH53	Hemicellulose	Pathotroph	Plant Pathogen	Probable	Facultative Yeast	GH	1.11111	5
3.2.1.89	Ascomycota	Eurotiomycetes	Phaeozem	endo-galactanase	GH53	Hemicellulose	Pathotroph	Plant Pathogen	Probable	NULL	GH	1.11111	5
3.2.1.89	Ascomycota	Eurotiomycetes	Phaeozem	endo-galactanase	GH53	Hemicellulose	Saprotroph	Undefined Saprotroph	Probable	Microfungus	GH	1.11111	5
3.2.1.89	Ascomycota	Eurotiomycetes	Phaeozem	endo-galactanase	GH53	Hemicellulose	Symbiotroph	Endophyte	Probable	NULL	GH	1.11111	5
3.2.1.89	Ascomycota	Eurotiomycetes	Podzol	endo-galactanase	GH53	Hemicellulose	Pathotroph	Animal Pathogen	Probable	Microfungus	GH	1.1625	6
3.2.1.89	Ascomycota	Eurotiomycetes	Podzol	endo-galactanase	GH53	Hemicellulose	Pathotroph	Animal Pathogen	Probable	NULL	GH	1.1625	6
3.2.1.89	Ascomycota	Eurotiomycetes	Podzol	endo-galactanase	GH53	Hemicellulose	Pathotroph	Plant Pathogen	Probable	Facultative Yeast	GH	1.1625	6
3.2.1.89	Ascomycota	Eurotiomycetes	Podzol	endo-galactanase	GH53	Hemicellulose	Pathotroph	Plant Pathogen	Probable	NULL	GH	1.1625	6
3.2.1.89	Ascomycota	Eurotiomycetes	Podzol	endo-galactanase	GH53	Hemicellulose	Saprotroph	Undefined Saprotroph	Probable	Microfungus	GH	1.1625	6
3.2.1.89	Ascomycota	Eurotiomycetes	Podzol	endo-galactanase	GH53	Hemicellulose	Symbiotroph	Endophyte	Probable	NULL	GH	1.1625	6
3.2.1.91	Ascomycota	Dothideomycetes	Podzol	cellobiohydrolase	GH6	Cellulose	Pathotroph	Plant Pathogen	Probable	NULL	GH	1.58824	1
3.2.1.91	Ascomycota	Eurotiomycetes	Luvisol	cellobiohydrolase	GH6	Cellulose	Pathotroph	Animal Pathogen	Probable	Microfungus	GH	0.72973	2
3.2.1.91	Ascomycota	Eurotiomycetes	Luvisol	cellobiohydrolase	GH6	Cellulose	Pathotroph	Animal Pathogen	Probable	NULL	GH	0.72973	2
3.2.1.91	Ascomycota	Eurotiomycetes	Luvisol	cellobiohydrolase	GH6	Cellulose	Pathotroph	Plant Pathogen	Probable	Facultative Yeast	GH	0.72973	2
3.2.1.91	Ascomycota	Eurotiomycetes	Luvisol	cellobiohydrolase	GH6	Cellulose	Pathotroph	Plant Pathogen	Probable	NULL	GH	0.72973	2
3.2.1.91	Ascomycota	Eurotiomycetes	Luvisol	cellobiohydrolase	GH6	Cellulose	Saprotroph	Undefined Saprotroph	Probable	Microfungus	GH	0.72973	2
3.2.1.91	Ascomycota	Eurotiomycetes	Luvisol	cellobiohydrolase	GH6	Cellulose	Symbiotroph	Endophyte	Probable	NULL	GH	0.72973	2
3.2.1.91	Ascomycota	Eurotiomycetes	Phaeozem	cellobiohydrolase	GH6	Cellulose	Pathotroph	Animal Pathogen	Probable	Microfungus	GH	1.03704	2
3.2.1.91	Ascomycota	Eurotiomycetes	Phaeozem	cellobiohydrolase	GH6	Cellulose	Pathotroph	Animal Pathogen	Probable	NULL	GH	1.03704	2
3.2.1.91	Ascomycota	Eurotiomycetes	Phaeozem	cellobiohydrolase	GH6	Cellulose	Pathotroph	Plant Pathogen	Probable	Facultative Yeast	GH	1.03704	2
3.2.1.91	Ascomycota	Eurotiomycetes	Phaeozem	cellobiohydrolase	GH6	Cellulose	Pathotroph	Plant Pathogen	Probable	NULL	GH	1.03704	2
3.2.1.91	Ascomycota	Eurotiomycetes	Phaeozem	cellobiohydrolase	GH6	Cellulose	Saprotroph	Undefined Saprotroph	Probable	Microfungus	GH	1.03704	2
3.2.1.91	Ascomycota	Eurotiomycetes	Phaeozem	cellobiohydrolase	GH6	Cellulose	Symbiotroph	Endophyte	Probable	NULL	GH	1.03704	2
3.2.1.91	Ascomycota	Sordariomycetes	Luvisol	cellobiohydrolase	GH6	Cellulose	Pathotroph	Animal Pathogen	Probable	NULL	GH	0.72973	2
3.2.1.91	Ascomycota	Sordariomycetes	Luvisol	cellobiohydrolase	GH6	Cellulose	Pathotroph	Endophyte-Fungal Parasite-Plant Pathogen	Probable	NULL	GH	0.72973	2
3.2.1.91	Ascomycota	Sordariomycetes	Luvisol	cellobiohydrolase	GH6	Cellulose	Symbiotroph	Endophyte	Probable	NULL	GH	0.72973	2
3.2.1.91	Ascomycota	Sordariomycetes	Phaeozem	cellobiohydrolase	GH6	Cellulose	Pathotroph	Animal Pathogen	Probable	NULL	GH	1.03704	1
3.2.1.91	Ascomycota	Sordariomycetes	Phaeozem	cellobiohydrolase	GH6	Cellulose	Pathotroph	Endophyte-Fungal Parasite-Plant Pathogen	Probable	NULL	GH	1.03704	1
3.2.1.91	Ascomycota	Sordariomycetes	Phaeozem	cellobiohydrolase	GH6	Cellulose	Symbiotroph	Endophyte	Probable	NULL	GH	1.03704	1
3.2.1.91	Ascomycota	Sordariomycetes	Podzol	cellobiohydrolase	GH6	Cellulose	Pathotroph	Animal Pathogen	Probable	NULL	GH	1.58824	4
3.2.1.91	Ascomycota	Sordariomycetes	Podzol	cellobiohydrolase	GH6	Cellulose	Pathotroph	Endophyte-Fungal Parasite-Plant Pathogen	Probable	NULL	GH	1.58824	4
3.2.1.91	Ascomycota	Sordariomycetes	Podzol	cellobiohydrolase	GH6	Cellulose	Symbiotroph	Endophyte	Probable	NULL	GH	1.58824	4
3.2.1.91	Basidiomycota	Agaricomycetes	Luvisol	cellobiohydrolase	GH6	Cellulose	Saprotroph	Litter Saprotroph	Highly Probable	Agaricoid	GH	0.72973	3
3.2.1.91	Basidiomycota	Agaricomycetes	Luvisol	cellobiohydrolase	GH6	Cellulose	Saprotroph	Soil Saprotroph	Probable	Agaricoid	GH	0.72973	3
3.2.1.91	Basidiomycota	Agaricomycetes	Luvisol	cellobiohydrolase	GH6	Cellulose	Saprotroph	Undefined Saprotroph	Probable	Agaricoid	GH	0.72973	3
3.2.1.91	Basidiomycota	Agaricomycetes	Luvisol	cellobiohydrolase	GH6	Cellulose	Saprotroph	Undefined Saprotroph	Probable	NULL	GH	0.72973	3
3.2.1.91	Basidiomycota	Agaricomycetes	Phaeozem	cellobiohydrolase	GH6	Cellulose	Saprotroph	Litter Saprotroph	Highly Probable	Agaricoid	GH	1.03704	9
3.2.1.91	Basidiomycota	Agaricomycetes	Phaeozem	cellobiohydrolase	GH6	Cellulose	Saprotroph	Soil Saprotroph	Probable	Agaricoid	GH	1.03704	9
3.2.1.91	Basidiomycota	Agaricomycetes	Phaeozem	cellobiohydrolase	GH6	Cellulose	Saprotroph	Undefined Saprotroph	Probable	Agaricoid	GH	1.03704	9
3.2.1.91	Basidiomycota	Agaricomycetes	Phaeozem	cellobiohydrolase	GH6	Cellulose	Saprotroph	Undefined Saprotroph	Probable	NULL	GH	1.03704	9
3.2.1.91	Basidiomycota	Agaricomycetes	Podzol	cellobiohydrolase	GH6	Cellulose	Saprotroph	Litter Saprotroph	Highly Probable	Agaricoid	GH	1.58824	9
3.2.1.91	Basidiomycota	Agaricomycetes	Podzol	cellobiohydrolase	GH6	Cellulose	Saprotroph	Soil Saprotroph	Probable	Agaricoid	GH	1.58824	9
3.2.1.91	Basidiomycota	Agaricomycetes	Podzol	cellobiohydrolase	GH6	Cellulose	Saprotroph	Undefined Saprotroph	Probable	Agaricoid	GH	1.58824	9
3.2.1.91	Basidiomycota	Agaricomycetes	Podzol	cellobiohydrolase	GH6	Cellulose	Saprotroph	Undefined Saprotroph	Probable	NULL	GH	1.58824	9
Supplementary Table S8b
Estimation of the number of peptides present overall corresponding to the different CAZy enzyme sub-categories under the main categories of auxiliary activity enzymes (AA), carbohydrate esterase (CE) and glycoside hydrolases (GH)
CAZy_category	CAZy	n_unique_peptides
AA	AA1	217
AA	AA3	593
AA	AA4	4
AA	AA5	7
AA	AA9	398
CE	CE1	13
CE	CE5	2
CE	CE8	32
GH	GH1	1485
GH	GH10	389
GH	GH11	498
GH	GH12	198
GH	GH13	132
GH	GH15	115
GH	GH16	128
GH	GH2	397
GH	GH26	43
GH	GH27	357
GH	GH28	215
GH	GH3	1848
GH	GH30	69
GH	GH31	132
GH	GH35	398
GH	GH36	403
GH	GH43	174
GH	GH45	203
GH	GH47	7
GH	GH5	787
GH	GH51	95
GH	GH53	11
GH	GH54	302
GH	GH55	673
GH	GH6	31
GH	GH62	363
GH	GH7	149
GH	GH71	2
GH	GH74	8
GH	GH81	108
Supplementary Table S10c
Summary of the expression of lignocellulose-degrading proteins from the carbohydrate-active enzyme database (CAZy) produced by fungi linked to the FUNGUILD database quantified by the number of peptides in these proteins and subsequently their relative presence under drought as compared to rainfall-fed conditions, represented by fold-change values in combination with the information about the pred…
Site	CAZy	CAZy_category	Phylum	Class	Protein_Description	Lignocellulose	EC	trophic_mode_funguild	fold_change_peptides_drought_vs_rainfall_mean	Signal_peptide_count	Extracellular_protein_fraction	Total_peptides_predicted_Phobius	Total_peptides_UniProt
Luvisol	AA1	AA	Ascomycota	Eurotiomycetes	laccase	Lignin	1.10.3.2	Pathotroph	0.977273	3	0.75	4	5
Luvisol	AA1	AA	Ascomycota	Eurotiomycetes	laccase	Lignin	1.10.3.2	Saprotroph	0.977273	3	0.75	4	5
Luvisol	AA1	AA	Ascomycota	Sordariomycetes	laccase	Lignin	1.10.3.2	Pathotroph	0.977273	17	0.894737	19	22
Luvisol	AA1	AA	Basidiomycota	Agaricomycetes	laccase	Lignin	1.10.3.2	Saprotroph	0.977273	28	0.736842	38	54
Luvisol	AA3	AA	Ascomycota	Eurotiomycetes	glucose oxidase	Lignocellulose- associated H₂O₂	1.1.3.4	Pathotroph	0.875	31	0.885714	35	37
Luvisol	AA3	AA	Ascomycota	Eurotiomycetes	glucose oxidase	Lignocellulose- associated H₂O₂	1.1.3.4	Saprotroph	0.875	31	0.885714	35	37
Luvisol	AA3	AA	Ascomycota	Eurotiomycetes	glucose oxidase	Lignocellulose- associated H₂O₂	1.1.3.4	Symbiotroph	0.875	31	0.885714	35	37
Luvisol	AA3	AA	Basidiomycota	Agaricomycetes	pyranose:acceptor oxidoreductase	Lignocellulose- associated H₂O₂	1.1.99.29	Saprotroph	1.19565	73	0.663636	110	151
Luvisol	AA4	AA	Ascomycota	Eurotiomycetes	vanillyl-alcohol oxidase	Lignocellulose- associated H₂O₂	1.1.3.38	Pathotroph	2	0	0	2	2
Luvisol	AA4	AA	Ascomycota	Eurotiomycetes	vanillyl-alcohol oxidase	Lignocellulose- associated H₂O₂	1.1.3.38	Symbiotroph	2	0	0	2	2
Luvisol	AA9	AA	Ascomycota	Eurotiomycetes	LPMO	Cellulose	1.14.99.56	Pathotroph	1.63551	6	0.857143	7	9
Luvisol	AA9	AA	Ascomycota	Eurotiomycetes	LPMO	Cellulose	1.14.99.56	Saprotroph	0.983146	6	0.857143	7	9
Luvisol	AA9	AA	Ascomycota	Sordariomycetes	LPMO	Cellulose	1.14.99.56	Pathotroph	1.63551	94	0.886792	106	132
Luvisol	AA9	AA	Ascomycota	Sordariomycetes	LPMO	Cellulose	1.14.99.56	Symbiotroph	1.96078	94	0.886792	106	132
Luvisol	CE1	CE	Basidiomycota	Agaricomycetes	acetylxylan/feruloyl esterase	Hemicellulose	3.1.1.73	Saprotroph	1.76344	2	1	2	2
Luvisol	CE8	CE	Ascomycota	Eurotiomycetes	endo-polygalacturonase	Pectin	3.2.1.15	Pathotroph	0.877358	7	0.777778	9	12
Luvisol	CE8	CE	Ascomycota	Eurotiomycetes	endo-polygalacturonase	Pectin	3.2.1.15	Symbiotroph	0.877358	7	0.777778	9	12
Luvisol	GH1	GH	Ascomycota	Eurotiomycetes	beta-glucosidase	Cellulose	3.2.1.21	Pathotroph	0.984533	54	0.364865	148	180
Luvisol	GH1	GH	Ascomycota	Eurotiomycetes	beta-glucosidase	Cellulose	3.2.1.21	Saprotroph	0.984533	54	0.364865	148	180
Luvisol	GH1	GH	Ascomycota	Eurotiomycetes	beta-glucosidase	Cellulose	3.2.1.21	Symbiotroph	0.984533	54	0.364865	148	180
Luvisol	GH1	GH	Ascomycota	Sordariomycetes	beta-glucosidase	Cellulose	3.2.1.21	Pathotroph	0.984533	113	0.383051	295	358
Luvisol	GH1	GH	Ascomycota	Sordariomycetes	beta-glucosidase	Cellulose	3.2.1.21	Symbiotroph	0.984533	113	0.383051	295	358
Luvisol	GH10	GH	Ascomycota	Eurotiomycetes	xylanase	Hemicellulose	3.2.1.8	Pathotroph	0.983213	20	0.833333	24	10
Luvisol	GH10	GH	Ascomycota	Eurotiomycetes	xylanase	Hemicellulose	3.2.1.8	Saprotroph	0.983213	20	0.833333	24	10
Luvisol	GH10	GH	Ascomycota	Eurotiomycetes	xylanase	Hemicellulose	3.2.1.8	Symbiotroph	0.983213	20	0.833333	24	10
Luvisol	GH10	GH	Ascomycota	Sordariomycetes	xylanase	Hemicellulose	3.2.1.8	Pathotroph	0.983213	95	0.913462	104	78
Luvisol	GH10	GH	Ascomycota	Sordariomycetes	xylanase	Hemicellulose	3.2.1.8	Symbiotroph	0.983213	95	0.913462	104	78
Luvisol	GH10	GH	Basidiomycota	Agaricomycetes	xylanase	Hemicellulose	3.2.1.8	Saprotroph	0.983213	37	0.685185	54	64
Luvisol	GH11	GH	Ascomycota	Dothideomycetes	xylanase	Hemicellulose	3.2.1.8	Pathotroph	0.983213	33	0.916667	36	26
Luvisol	GH11	GH	Ascomycota	Eurotiomycetes	xylanase	Hemicellulose	3.2.1.8	Pathotroph	0.983213	20	0.833333	24	10
Luvisol	GH11	GH	Ascomycota	Eurotiomycetes	xylanase	Hemicellulose	3.2.1.8	Saprotroph	0.983213	20	0.833333	24	10
Luvisol	GH11	GH	Ascomycota	Eurotiomycetes	xylanase	Hemicellulose	3.2.1.8	Symbiotroph	0.983213	20	0.833333	24	10
Luvisol	GH11	GH	Ascomycota	Sordariomycetes	xylanase	Hemicellulose	3.2.1.8	Pathotroph	0.983213	95	0.913462	104	78
Luvisol	GH11	GH	Ascomycota	Sordariomycetes	xylanase	Hemicellulose	3.2.1.8	Symbiotroph	0.983213	95	0.913462	104	78
Luvisol	GH11	GH	Basidiomycota	Agaricomycetes	xylanase	Hemicellulose	3.2.1.8	Saprotroph	0.983213	37	0.685185	54	64
Luvisol	GH12	GH	Ascomycota	Dothideomycetes	endo-glucanase	Cellulose	3.2.1.4	Pathotroph	1.62058	13	1	13	15
Luvisol	GH12	GH	Ascomycota	Eurotiomycetes	endo-glucanase	Cellulose	3.2.1.4	Pathotroph	1.62058	29	0.617021	47	9
Luvisol	GH12	GH	Ascomycota	Eurotiomycetes	endo-glucanase	Cellulose	3.2.1.4	Saprotroph	1.84615	29	0.617021	47	9
Luvisol	GH12	GH	Ascomycota	Eurotiomycetes	endo-glucanase	Cellulose	3.2.1.4	Symbiotroph	1.54506	29	0.617021	47	9
Luvisol	GH12	GH	Ascomycota	Sordariomycetes	endo-glucanase	Cellulose	3.2.1.4	Pathotroph	1.62058	71	0.612069	116	46
Luvisol	GH12	GH	Ascomycota	Sordariomycetes	endo-glucanase	Cellulose	3.2.1.4	Symbiotroph	1.54506	71	0.612069	116	46
Luvisol	GH13	GH	Ascomycota	Eurotiomycetes	alpha-glucosidase	Starch	3.2.1.20	Pathotroph	1.02679	8	0.258065	31	39
Luvisol	GH13	GH	Ascomycota	Eurotiomycetes	alpha-glucosidase	Starch	3.2.1.20	Saprotroph	1.02679	8	0.258065	31	39
Luvisol	GH15	GH	Ascomycota	Eurotiomycetes	exo-glucanase	Cellulose	3.2.1.3	Pathotroph	1.15504	25	0.543478	46	18
Luvisol	GH15	GH	Ascomycota	Eurotiomycetes	exo-glucanase	Cellulose	3.2.1.3	Saprotroph	1.15504	25	0.543478	46	18
Luvisol	GH15	GH	Ascomycota	Eurotiomycetes	exo-glucanase	Cellulose	3.2.1.3	Symbiotroph	1.15504	25	0.543478	46	18
Luvisol	GH15	GH	Ascomycota	Saccharomycetes	exo-glucanase	Cellulose	3.2.1.3	Pathotroph	1.15504	6	0.75	8	4
Luvisol	GH15	GH	Basidiomycota	Agaricomycetes	exo-glucanase	Cellulose	3.2.1.3	Symbiotroph	1.15504	15	0.625	24	29
Luvisol	GH15	GH	Mucoromycota	Mucoromycetes	exo-glucanase	Cellulose	3.2.1.3	Pathotroph	1.15504	3	0.75	4	4
Luvisol	GH16	GH	Ascomycota	Eurotiomycetes	endo-glucanase	Cellulose	3.2.1.39	Pathotroph	4.53347	29	0.617021	47	33
Luvisol	GH16	GH	Ascomycota	Eurotiomycetes	endo-glucanase	Cellulose	3.2.1.39	Saprotroph	0.969631	29	0.617021	47	33
Luvisol	GH16	GH	Ascomycota	Eurotiomycetes	endo-glucanase	Cellulose	3.2.1.6	Pathotroph	0.111562	29	0.617021	47	4
Luvisol	GH16	GH	Basidiomycota	Ustilaginomycetes	endo-glucanase	Cellulose	3.2.1.39	Pathotroph	0.969631	1	0.2	5	5
Luvisol	GH2	GH	Ascomycota	Eurotiomycetes	beta-galactosidase	Hemicellulose	3.2.1.23	Pathotroph	0.992718	24	0.6	40	44
Luvisol	GH2	GH	Ascomycota	Eurotiomycetes	beta-galactosidase	Hemicellulose	3.2.1.23	Saprotroph	0.992718	24	0.6	40	44
Luvisol	GH2	GH	Ascomycota	Eurotiomycetes	beta-mannosidase	Hemicellulose	3.2.1.25	Pathotroph	1	4	0.148148	27	34
Luvisol	GH2	GH	Ascomycota	Eurotiomycetes	beta-mannosidase	Hemicellulose	3.2.1.25	Saprotroph	1	4	0.148148	27	34
Luvisol	GH2	GH	Ascomycota	Sordariomycetes	beta-mannosidase	Hemicellulose	3.2.1.25	Pathotroph	1	8	0.163265	49	61
Luvisol	GH2	GH	Ascomycota	Sordariomycetes	beta-mannosidase	Hemicellulose	3.2.1.25	Symbiotroph	1	8	0.163265	49	61
Luvisol	GH26	GH	Ascomycota	Dothideomycetes	endo-mannanase	Hemicellulose	3.2.1.78	Saprotroph	1.0355	8	1	8	12
Luvisol	GH26	GH	Ascomycota	Eurotiomycetes	endo-mannanase	Hemicellulose	3.2.1.78	Pathotroph	1.0355	2	0.5	4	6
Luvisol	GH26	GH	Ascomycota	Eurotiomycetes	endo-mannanase	Hemicellulose	3.2.1.78	Saprotroph	1.0355	2	0.5	4	6
Luvisol	GH27	GH	Ascomycota	Eurotiomycetes	alpha-galactosidase	Starch	3.2.1.22	Pathotroph	1.0607	19	0.542857	35	42
Luvisol	GH27	GH	Ascomycota	Eurotiomycetes	alpha-galactosidase	Starch	3.2.1.22	Saprotroph	1.0607	19	0.542857	35	42
Luvisol	GH27	GH	Ascomycota	Eurotiomycetes	alpha-galactosidase	Starch	3.2.1.22	Symbiotroph	1.0607	19	0.542857	35	42
Luvisol	GH27	GH	Ascomycota	Pichiomycetes	alpha-galactosidase	Starch	3.2.1.22	Saprotroph	1.0607	1	1	1	1
Luvisol	GH27	GH	Ascomycota	Sordariomycetes	alpha-galactosidase	Starch	3.2.1.22	Pathotroph	1.0607	33	0.515625	64	72
Luvisol	GH27	GH	Ascomycota	Sordariomycetes	alpha-galactosidase	Starch	3.2.1.22	Symbiotroph	1.0607	33	0.515625	64	72
Luvisol	GH27	GH	Mucoromycota	Umbelopsidomycetes	alpha-galactosidase	Starch	3.2.1.22	Saprotroph	1.0607	1	1	1	1
Luvisol	GH28	GH	Ascomycota	Dothideomycetes	endo-polygalacturonase	Pectin	3.2.1.15	Pathotroph	0.877358	20	1	20	24
Luvisol	GH28	GH	Ascomycota	Eurotiomycetes	endo-polygalacturonase	Pectin	3.2.1.15	Pathotroph	0.877358	7	0.777778	9	12
Luvisol	GH28	GH	Ascomycota	Eurotiomycetes	endo-polygalacturonase	Pectin	3.2.1.15	Saprotroph	0.877358	7	0.777778	9	12
Luvisol	GH28	GH	Ascomycota	Eurotiomycetes	endo-polygalacturonase	Pectin	3.2.1.15	Symbiotroph	0.877358	7	0.777778	9	12
Luvisol	GH28	GH	Ascomycota	Eurotiomycetes	exo-galacturonase	Pectin	3.2.1.67	Pathotroph	0.778626	16	0.888889	18	18
Luvisol	GH28	GH	Ascomycota	Eurotiomycetes	exo-galacturonase	Pectin	3.2.1.67	Saprotroph	0.778626	16	0.888889	18	18
Luvisol	GH28	GH	Ascomycota	Sordariomycetes	endo-polygalacturonase	Pectin	3.2.1.15	Pathotroph	0.877358	9	0.9	10	12
Luvisol	GH28	GH	Ascomycota	Sordariomycetes	endo-polygalacturonase	Pectin	3.2.1.15	Symbiotroph	0.877358	9	0.9	10	12
Luvisol	GH28	GH	Ascomycota	Sordariomycetes	exo-galacturonase	Pectin	3.2.1.67	Pathotroph	0.778626	18	0.947368	19	20
Luvisol	GH3	GH	Ascomycota	Eurotiomycetes	beta-glucosidase	Cellulose	3.2.1.21	Pathotroph	0.984533	54	0.364865	148	180
Luvisol	GH3	GH	Ascomycota	Eurotiomycetes	beta-glucosidase	Cellulose	3.2.1.21	Saprotroph	0.984533	54	0.364865	148	180
Luvisol	GH3	GH	Ascomycota	Eurotiomycetes	beta-glucosidase	Cellulose	3.2.1.21	Symbiotroph	0.984533	54	0.364865	148	180
Luvisol	GH3	GH	Ascomycota	Eurotiomycetes	xylanase	Hemicellulose	3.2.1.37	Pathotroph	0.700104	20	0.833333	24	19
Luvisol	GH3	GH	Ascomycota	Eurotiomycetes	xylanase	Hemicellulose	3.2.1.37	Saprotroph	0.485507	20	0.833333	24	19
Luvisol	GH3	GH	Ascomycota	Eurotiomycetes	xylanase	Hemicellulose	3.2.1.8	Pathotroph	2.14211	20	0.833333	24	10
Luvisol	GH3	GH	Ascomycota	Eurotiomycetes	xylanase	Hemicellulose	3.2.1.8	Saprotroph	1.48551	20	0.833333	24	10
Luvisol	GH3	GH	Ascomycota	Pichiomycetes	beta-glucosidase	Cellulose	3.2.1.21	Pathotroph	0.984533	2	0.125	16	21
Luvisol	GH3	GH	Ascomycota	Sordariomycetes	beta-glucosidase	Cellulose	3.2.1.21	Pathotroph	0.984533	113	0.383051	295	358
Luvisol	GH3	GH	Ascomycota	Sordariomycetes	beta-glucosidase	Cellulose	3.2.1.21	Symbiotroph	0.984533	113	0.383051	295	358
Luvisol	GH3	GH	Ascomycota	Sordariomycetes	xylanase	Hemicellulose	3.2.1.37	Pathotroph	0.700104	95	0.913462	104	37
Luvisol	GH3	GH	Ascomycota	Sordariomycetes	xylanase	Hemicellulose	3.2.1.37	Symbiotroph	0.992593	95	0.913462	104	37
Luvisol	GH3	GH	Basidiomycota	Ustilaginomycetes	beta-glucosidase	Cellulose	3.2.1.21	Pathotroph	0.984533	2	0.666667	3	4
Luvisol	GH3	GH	Mucoromycota	Mucoromycetes	beta-glucosidase	Cellulose	3.2.1.21	Pathotroph	0.984533	11	0.916667	12	18
Luvisol	GH30	GH	Ascomycota	Eurotiomycetes	endo-glucanase	Cellulose	3.2.1.75	Pathotroph	0.85	29	0.617021	47	2
Luvisol	GH30	GH	Ascomycota	Eurotiomycetes	endo-glucanase	Cellulose	3.2.1.75	Saprotroph	0.85	29	0.617021	47	2
Luvisol	GH30	GH	Ascomycota	Eurotiomycetes	xylanase	Hemicellulose	3.2.1.8	Pathotroph	0.983213	20	0.833333	24	10
Luvisol	GH30	GH	Ascomycota	Sordariomycetes	endo-glucanase	Cellulose	3.2.1.75	Pathotroph	0.85	71	0.612069	116	10
Luvisol	GH30	GH	Ascomycota	Sordariomycetes	endo-glucanase	Cellulose	3.2.1.75	Symbiotroph	0.85	71	0.612069	116	10
Luvisol	GH31	GH	Ascomycota	Eurotiomycetes	alpha-glucosidase	Starch	3.2.1.20	Pathotroph	1.02679	8	0.258065	31	39
Luvisol	GH31	GH	Ascomycota	Eurotiomycetes	alpha-glucosidase	Starch	3.2.1.20	Saprotroph	1.02679	8	0.258065	31	39
Luvisol	GH35	GH	Ascomycota	Eurotiomycetes	beta-galactosidase	Hemicellulose	3.2.1.23	Pathotroph	0.992718	24	0.6	40	44
Luvisol	GH35	GH	Ascomycota	Eurotiomycetes	beta-galactosidase	Hemicellulose	3.2.1.23	Saprotroph	0.992718	24	0.6	40	44
Luvisol	GH35	GH	Ascomycota	Eurotiomycetes	beta-galactosidase	Hemicellulose	3.2.1.23	Symbiotroph	0.992718	24	0.6	40	44
Luvisol	GH35	GH	Ascomycota	Sordariomycetes	beta-galactosidase	Hemicellulose	3.2.1.23	Pathotroph	0.992718	45	0.529412	85	104
Luvisol	GH35	GH	Ascomycota	Sordariomycetes	beta-galactosidase	Hemicellulose	3.2.1.23	Symbiotroph	0.992718	45	0.529412	85	104
Luvisol	GH36	GH	Ascomycota	Eurotiomycetes	alpha-galactosidase	Starch	3.2.1.22	Pathotroph	1.0607	19	0.542857	35	42
Luvisol	GH36	GH	Ascomycota	Eurotiomycetes	alpha-galactosidase	Starch	3.2.1.22	Saprotroph	1.0607	19	0.542857	35	42
Luvisol	GH36	GH	Ascomycota	Eurotiomycetes	alpha-galactosidase	Starch	3.2.1.22	Symbiotroph	1.0607	19	0.542857	35	42
Luvisol	GH36	GH	Ascomycota	Sordariomycetes	alpha-galactosidase	Starch	3.2.1.22	Pathotroph	1.0607	33	0.515625	64	72
Luvisol	GH36	GH	Ascomycota	Sordariomycetes	alpha-galactosidase	Starch	3.2.1.22	Symbiotroph	1.0607	33	0.515625	64	72
Luvisol	GH36	GH	Mucoromycota	Mucoromycetes	alpha-galactosidase	Starch	3.2.1.22	Pathotroph	1.0607	2	0.142857	14	17
Luvisol	GH43	GH	Ascomycota	Dothideomycetes	xylanase	Hemicellulose	3.2.1.37	Pathotroph	0.992593	33	0.916667	36	11
Luvisol	GH43	GH	Ascomycota	Eurotiomycetes	arabinofuranosidase	Hemicellulose	3.2.1.55	Pathotroph	0.891626	15	0.357143	42	43
Luvisol	GH43	GH	Ascomycota	Eurotiomycetes	arabinofuranosidase	Hemicellulose	3.2.1.55	Symbiotroph	0.891626	15	0.357143	42	43
Luvisol	GH43	GH	Ascomycota	Eurotiomycetes	xylanase	Hemicellulose	3.2.1.37	Pathotroph	0.992593	20	0.833333	24	19
Luvisol	GH43	GH	Ascomycota	Eurotiomycetes	xylanase	Hemicellulose	3.2.1.37	Saprotroph	0.992593	20	0.833333	24	19
Luvisol	GH43	GH	Ascomycota	Eurotiomycetes	xylanase	Hemicellulose	3.2.1.37	Symbiotroph	0.992593	20	0.833333	24	19
Luvisol	GH45	GH	Ascomycota	Dothideomycetes	endo-glucanase	Cellulose	3.2.1.4	Pathotroph	0.935065	13	1	13	15
Luvisol	GH45	GH	Ascomycota	Eurotiomycetes	endo-glucanase	Cellulose	3.2.1.4	Pathotroph	0.935065	29	0.617021	47	9
Luvisol	GH45	GH	Ascomycota	Eurotiomycetes	endo-glucanase	Cellulose	3.2.1.4	Symbiotroph	0.935065	29	0.617021	47	9
Luvisol	GH45	GH	Ascomycota	Sordariomycetes	endo-glucanase	Cellulose	3.2.1.4	Pathotroph	0.935065	71	0.612069	116	46
Luvisol	GH45	GH	Ascomycota	Sordariomycetes	endo-glucanase	Cellulose	3.2.1.4	Symbiotroph	0.935065	71	0.612069	116	46
Luvisol	GH45	GH	Chytridiomycota	Chytridiomycetes	endo-glucanase	Cellulose	3.2.1.4	Saprotroph	0.935065	0	0	1	1
Luvisol	GH45	GH	Mucoromycota	Mucoromycetes	endo-glucanase	Cellulose	3.2.1.4	Pathotroph	0.935065	7	0.777778	9	10
Luvisol	GH47	GH	Ascomycota	Sordariomycetes	alpha-mannosidase	Starch	3.2.1.113	Pathotroph	1.75	1	1	1	1
Luvisol	GH47	GH	Ascomycota	Sordariomycetes	alpha-mannosidase	Starch	3.2.1.113	Symbiotroph	1.75	1	1	1	1
Luvisol	GH5	GH	Ascomycota	Dothideomycetes	exo-glucanase	Cellulose	3.2.1.58	Pathotroph	1.04514	17	0.369565	46	55
Luvisol	GH5	GH	Ascomycota	Eurotiomycetes	endo-glucanase	Cellulose	3.2.1.4	Pathotroph	1.37288	29	0.617021	47	9
Luvisol	GH5	GH	Ascomycota	Eurotiomycetes	endo-glucanase	Cellulose	3.2.1.4	Saprotroph	1.79253	29	0.617021	47	9
Luvisol	GH5	GH	Ascomycota	Eurotiomycetes	endo-glucanase	Cellulose	3.2.1.4	Symbiotroph	1.37288	29	0.617021	47	9
Luvisol	GH5	GH	Ascomycota	Eurotiomycetes	endo-glucanase	Cellulose	3.2.1.75	Pathotroph	0.0540254	29	0.617021	47	2
Luvisol	GH5	GH	Ascomycota	Eurotiomycetes	endo-glucanase	Cellulose	3.2.1.75	Saprotroph	0.0705394	29	0.617021	47	2
Luvisol	GH5	GH	Ascomycota	Eurotiomycetes	endo-mannanase	Hemicellulose	3.2.1.78	Pathotroph	1.0355	2	0.5	4	6
Luvisol	GH5	GH	Ascomycota	Eurotiomycetes	endo-mannanase	Hemicellulose	3.2.1.78	Saprotroph	1.0355	2	0.5	4	6
Luvisol	GH5	GH	Ascomycota	Eurotiomycetes	endo-mannanase	Hemicellulose	3.2.1.78	Symbiotroph	1.0355	2	0.5	4	6
Luvisol	GH5	GH	Ascomycota	Eurotiomycetes	exo-glucanase	Cellulose	3.2.1.58	Pathotroph	1.04514	25	0.543478	46	41
Luvisol	GH5	GH	Ascomycota	Eurotiomycetes	exo-glucanase	Cellulose	3.2.1.58	Saprotroph	1.04514	25	0.543478	46	41
Luvisol	GH5	GH	Ascomycota	Pichiomycetes	exo-glucanase	Cellulose	3.2.1.58	Pathotroph	1.04514	4	0.8	5	7
Luvisol	GH5	GH	Ascomycota	Saccharomycetes	exo-glucanase	Cellulose	3.2.1.58	Pathotroph	1.04514	6	0.75	8	4
Luvisol	GH5	GH	Ascomycota	Sordariomycetes	endo-glucanase	Cellulose	3.2.1.4	Pathotroph	1.37288	71	0.612069	116	46
Luvisol	GH5	GH	Ascomycota	Sordariomycetes	endo-glucanase	Cellulose	3.2.1.4	Symbiotroph	1.37288	71	0.612069	116	46
Luvisol	GH5	GH	Ascomycota	Sordariomycetes	endo-glucanase	Cellulose	3.2.1.75	Pathotroph	0.0540254	71	0.612069	116	10
Luvisol	GH5	GH	Ascomycota	Sordariomycetes	endo-glucanase	Cellulose	3.2.1.75	Symbiotroph	0.0540254	71	0.612069	116	10
Luvisol	GH5	GH	Ascomycota	Sordariomycetes	endo-mannanase	Hemicellulose	3.2.1.78	Pathotroph	1.0355	14	1	14	18
Luvisol	GH5	GH	Ascomycota	Sordariomycetes	endo-mannanase	Hemicellulose	3.2.1.78	Symbiotroph	1.0355	14	1	14	18
Luvisol	GH5	GH	Basidiomycota	Agaricomycetes	endo-glucanase	Cellulose	3.2.1.4	Symbiotroph	0.935065	27	0.692308	39	48
Luvisol	GH5	GH	Basidiomycota	Agaricomycetes	endo-mannanase	Hemicellulose	3.2.1.78	Saprotroph	1.0355	30	0.857143	35	45
Luvisol	GH51	GH	Ascomycota	Eurotiomycetes	arabinofuranosidase	Hemicellulose	3.2.1.55	Pathotroph	0.891626	15	0.357143	42	43
Luvisol	GH51	GH	Ascomycota	Eurotiomycetes	arabinofuranosidase	Hemicellulose	3.2.1.55	Saprotroph	0.891626	15	0.357143	42	43
Luvisol	GH51	GH	Ascomycota	Eurotiomycetes	arabinofuranosidase	Hemicellulose	3.2.1.55	Symbiotroph	0.891626	15	0.357143	42	43
Luvisol	GH54	GH	Ascomycota	Eurotiomycetes	arabinofuranosidase	Hemicellulose	3.2.1.55	Pathotroph	0.891626	15	0.357143	42	43
Luvisol	GH54	GH	Ascomycota	Eurotiomycetes	arabinofuranosidase	Hemicellulose	3.2.1.55	Saprotroph	0.891626	15	0.357143	42	43
Luvisol	GH54	GH	Ascomycota	Eurotiomycetes	arabinofuranosidase	Hemicellulose	3.2.1.55	Symbiotroph	0.891626	15	0.357143	42	43
Luvisol	GH54	GH	Ascomycota	Sordariomycetes	arabinofuranosidase	Hemicellulose	3.2.1.55	Pathotroph	0.891626	26	0.83871	31	34
Luvisol	GH54	GH	Ascomycota	Sordariomycetes	arabinofuranosidase	Hemicellulose	3.2.1.55	Symbiotroph	0.891626	26	0.83871	31	34
Luvisol	GH54	GH	Ascomycota	Sordariomycetes	xylanase	Hemicellulose	3.2.1.37	Pathotroph	0.992593	95	0.913462	104	37
Luvisol	GH54	GH	Ascomycota	Sordariomycetes	xylanase	Hemicellulose	3.2.1.37	Symbiotroph	0.992593	95	0.913462	104	37
Luvisol	GH55	GH	Ascomycota	Dothideomycetes	exo-glucanase	Cellulose	3.2.1.58	Pathotroph	1.04514	17	0.369565	46	55
Luvisol	GH55	GH	Ascomycota	Eurotiomycetes	exo-glucanase	Cellulose	3.2.1.58	Pathotroph	1.04514	25	0.543478	46	41
Luvisol	GH55	GH	Ascomycota	Eurotiomycetes	exo-glucanase	Cellulose	3.2.1.58	Saprotroph	1.04514	25	0.543478	46	41
Luvisol	GH55	GH	Ascomycota	Eurotiomycetes	exo-glucanase	Cellulose	3.2.1.58	Symbiotroph	1.04514	25	0.543478	46	41
Luvisol	GH55	GH	Ascomycota	Sordariomycetes	endo-glucanase	Cellulose	3.2.1.39	Pathotroph	0.969631	71	0.612069	116	80
Luvisol	GH55	GH	Ascomycota	Sordariomycetes	endo-glucanase	Cellulose	3.2.1.39	Symbiotroph	0.969631	71	0.612069	116	80
Luvisol	GH55	GH	Ascomycota	Sordariomycetes	exo-glucanase	Cellulose	3.2.1.58	Pathotroph	1.04514	9	0.25	36	42
Luvisol	GH55	GH	Ascomycota	Sordariomycetes	exo-glucanase	Cellulose	3.2.1.58	Symbiotroph	1.04514	9	0.25	36	42
Luvisol	GH6	GH	Ascomycota	Eurotiomycetes	cellobiohydrolase	Cellulose	3.2.1.91	Pathotroph	0.72973	1	1	1	2
Luvisol	GH6	GH	Ascomycota	Eurotiomycetes	cellobiohydrolase	Cellulose	3.2.1.91	Saprotroph	0.72973	1	1	1	2
Luvisol	GH6	GH	Ascomycota	Eurotiomycetes	cellobiohydrolase	Cellulose	3.2.1.91	Symbiotroph	0.72973	1	1	1	2
Luvisol	GH6	GH	Ascomycota	Sordariomycetes	cellobiohydrolase	Cellulose	3.2.1.91	Pathotroph	0.72973	1	0.5	2	2
Luvisol	GH6	GH	Ascomycota	Sordariomycetes	cellobiohydrolase	Cellulose	3.2.1.91	Symbiotroph	0.72973	1	0.5	2	2
Luvisol	GH6	GH	Basidiomycota	Agaricomycetes	cellobiohydrolase	Cellulose	3.2.1.91	Saprotroph	0.72973	1	1	1	3
Luvisol	GH62	GH	Ascomycota	Eurotiomycetes	arabinofuranosidase	Hemicellulose	3.2.1.55	Pathotroph	0.891626	15	0.357143	42	43
Luvisol	GH62	GH	Ascomycota	Eurotiomycetes	arabinofuranosidase	Hemicellulose	3.2.1.55	Saprotroph	0.891626	15	0.357143	42	43
Luvisol	GH62	GH	Ascomycota	Eurotiomycetes	arabinofuranosidase	Hemicellulose	3.2.1.55	Symbiotroph	0.891626	15	0.357143	42	43
Luvisol	GH62	GH	Ascomycota	Sordariomycetes	arabinofuranosidase	Hemicellulose	3.2.1.55	Pathotroph	0.891626	26	0.83871	31	34
Luvisol	GH62	GH	Ascomycota	Sordariomycetes	arabinofuranosidase	Hemicellulose	3.2.1.55	Symbiotroph	0.891626	26	0.83871	31	34
Luvisol	GH62	GH	Basidiomycota	Agaricomycetes	arabinofuranosidase	Hemicellulose	3.2.1.55	Saprotroph	0.891626	22	0.594595	37	42
Luvisol	GH7	GH	Ascomycota	Eurotiomycetes	endo-glucanase	Cellulose	3.2.1.4	Pathotroph	0.935065	29	0.617021	47	9
Luvisol	GH7	GH	Ascomycota	Eurotiomycetes	endo-glucanase	Cellulose	3.2.1.4	Saprotroph	0.935065	29	0.617021	47	9
Luvisol	GH7	GH	Ascomycota	Eurotiomycetes	endo-glucanase	Cellulose	3.2.1.4	Symbiotroph	0.935065	29	0.617021	47	9
Luvisol	GH7	GH	Ascomycota	Sordariomycetes	endo-glucanase	Cellulose	3.2.1.4	Pathotroph	0.935065	71	0.612069	116	46
Luvisol	GH7	GH	Ascomycota	Sordariomycetes	endo-glucanase	Cellulose	3.2.1.4	Symbiotroph	0.935065	71	0.612069	116	46
Luvisol	GH81	GH	Ascomycota	Eurotiomycetes	endo-glucanase	Cellulose	3.2.1.39	Pathotroph	0.969631	29	0.617021	47	33
Luvisol	GH81	GH	Ascomycota	Eurotiomycetes	endo-glucanase	Cellulose	3.2.1.39	Saprotroph	0.969631	29	0.617021	47	33
Phaeozem	AA1	AA	Ascomycota	Eurotiomycetes	laccase	Lignin	1.10.3.2	Pathotroph	1.01402	1	0.5	2	5
Phaeozem	AA1	AA	Ascomycota	Eurotiomycetes	laccase	Lignin	1.10.3.2	Saprotroph	1.01402	1	0.5	2	5
Phaeozem	AA1	AA	Ascomycota	Leotiomycetes	laccase	Lignin	1.10.3.2	Pathotroph	1.01402	2	1	2	3
Phaeozem	AA1	AA	Ascomycota	Sordariomycetes	laccase	Lignin	1.10.3.2	Pathotroph	1.01402	7	0.875	8	9
Phaeozem	AA1	AA	Basidiomycota	Agaricomycetes	laccase	Lignin	1.10.3.2	Saprotroph	1.01402	28	0.666667	42	51
Phaeozem	AA3	AA	Ascomycota	Eurotiomycetes	glucose oxidase	Lignocellulose- associated H₂O₂	1.1.3.4	Pathotroph	1.35484	22	0.88	25	29
Phaeozem	AA3	AA	Ascomycota	Eurotiomycetes	glucose oxidase	Lignocellulose- associated H₂O₂	1.1.3.4	Saprotroph	1.35484	22	0.88	25	29
Phaeozem	AA3	AA	Ascomycota	Eurotiomycetes	glucose oxidase	Lignocellulose- associated H₂O₂	1.1.3.4	Symbiotroph	1.35484	22	0.88	25	29
Phaeozem	AA3	AA	Basidiomycota	Agaricomycetes	pyranose:acceptor oxidoreductase	Lignocellulose- associated H₂O₂	1.1.99.29	Saprotroph	1.14685	96	0.657534	146	190
Phaeozem	AA4	AA	Ascomycota	Eurotiomycetes	vanillyl-alcohol oxidase	Lignocellulose- associated H₂O₂	1.1.3.38	Pathotroph	1.5	0	0	2	2
Phaeozem	AA4	AA	Ascomycota	Eurotiomycetes	vanillyl-alcohol oxidase	Lignocellulose- associated H₂O₂	1.1.3.38	Symbiotroph	1.5	0	0	2	2
Phaeozem	AA9	AA	Ascomycota	Eurotiomycetes	LPMO	Cellulose	1.14.99.56	Pathotroph	1.07989	10	0.909091	11	10
Phaeozem	AA9	AA	Ascomycota	Eurotiomycetes	LPMO	Cellulose	1.14.99.56	Saprotroph	1.07989	10	0.909091	11	10
Phaeozem	AA9	AA	Ascomycota	Sordariomycetes	LPMO	Cellulose	1.14.99.56	Pathotroph	1.07989	96	0.897196	107	113
Phaeozem	AA9	AA	Ascomycota	Sordariomycetes	LPMO	Cellulose	1.14.99.56	Symbiotroph	1.07989	96	0.897196	107	113
Phaeozem	CE1	CE	Ascomycota	Eurotiomycetes	acetylxylan/feruloyl esterase	Hemicellulose	3.1.1.72	Pathotroph	0.375	1	1	1	2
Phaeozem	CE1	CE	Ascomycota	Eurotiomycetes	acetylxylan/feruloyl esterase	Hemicellulose	3.1.1.72	Saprotroph	0.375	1	1	1	2
Phaeozem	CE1	CE	Basidiomycota	Agaricomycetes	acetylxylan/feruloyl esterase	Hemicellulose	3.1.1.73	Saprotroph	2	2	1	2	5
Phaeozem	CE5	CE	Ascomycota	Eurotiomycetes	acetylxylan/feruloyl esterase	Hemicellulose	3.1.1.72	Pathotroph	0.375	1	1	1	2
Phaeozem	CE8	CE	Ascomycota	Eurotiomycetes	endo-polygalacturonase	Pectin	3.2.1.15	Pathotroph	1.05344	7	0.875	8	13
Phaeozem	CE8	CE	Ascomycota	Eurotiomycetes	endo-polygalacturonase	Pectin	3.2.1.15	Symbiotroph	1.05344	7	0.875	8	13
Phaeozem	GH1	GH	Ascomycota	Eurotiomycetes	beta-glucosidase	Cellulose	3.2.1.21	Pathotroph	1.05591	47	0.456311	103	136
Phaeozem	GH1	GH	Ascomycota	Eurotiomycetes	beta-glucosidase	Cellulose	3.2.1.21	Saprotroph	1.05591	47	0.456311	103	136
Phaeozem	GH1	GH	Ascomycota	Eurotiomycetes	beta-glucosidase	Cellulose	3.2.1.21	Symbiotroph	1.05591	47	0.456311	103	136
Phaeozem	GH1	GH	Ascomycota	Sordariomycetes	beta-glucosidase	Cellulose	3.2.1.21	Pathotroph	1.05591	107	0.406844	263	305
Phaeozem	GH1	GH	Ascomycota	Sordariomycetes	beta-glucosidase	Cellulose	3.2.1.21	Symbiotroph	1.05591	107	0.406844	263	305
Phaeozem	GH10	GH	Ascomycota	Eurotiomycetes	xylanase	Hemicellulose	3.2.1.8	Pathotroph	1.05239	28	0.848485	33	14
Phaeozem	GH10	GH	Ascomycota	Eurotiomycetes	xylanase	Hemicellulose	3.2.1.8	Saprotroph	1.05239	28	0.848485	33	14
Phaeozem	GH10	GH	Ascomycota	Eurotiomycetes	xylanase	Hemicellulose	3.2.1.8	Symbiotroph	1.05239	28	0.848485	33	14
Phaeozem	GH10	GH	Ascomycota	Sordariomycetes	xylanase	Hemicellulose	3.2.1.8	Pathotroph	1.05239	72	0.935065	77	70
Phaeozem	GH10	GH	Ascomycota	Sordariomycetes	xylanase	Hemicellulose	3.2.1.8	Symbiotroph	1.05239	72	0.935065	77	70
Phaeozem	GH10	GH	Basidiomycota	Agaricomycetes	xylanase	Hemicellulose	3.2.1.8	Saprotroph	1.05239	32	0.761905	42	56
Phaeozem	GH11	GH	Ascomycota	Dothideomycetes	xylanase	Hemicellulose	3.2.1.8	Pathotroph	1.05239	35	0.875	40	33
Phaeozem	GH11	GH	Ascomycota	Eurotiomycetes	xylanase	Hemicellulose	3.2.1.8	Pathotroph	1.05239	28	0.848485	33	14
Phaeozem	GH11	GH	Ascomycota	Eurotiomycetes	xylanase	Hemicellulose	3.2.1.8	Saprotroph	1.05239	28	0.848485	33	14
Phaeozem	GH11	GH	Ascomycota	Eurotiomycetes	xylanase	Hemicellulose	3.2.1.8	Symbiotroph	1.05239	28	0.848485	33	14
Phaeozem	GH11	GH	Ascomycota	Leotiomycetes	xylanase	Hemicellulose	3.2.1.8	Pathotroph	1.05239	2	0.4	5	5
Phaeozem	GH11	GH	Ascomycota	Sordariomycetes	xylanase	Hemicellulose	3.2.1.8	Pathotroph	1.05239	72	0.935065	77	70
Phaeozem	GH11	GH	Ascomycota	Sordariomycetes	xylanase	Hemicellulose	3.2.1.8	Symbiotroph	1.05239	72	0.935065	77	70
Phaeozem	GH11	GH	Basidiomycota	Agaricomycetes	xylanase	Hemicellulose	3.2.1.8	Saprotroph	1.05239	32	0.761905	42	56
Phaeozem	GH11	GH	Chytridiomycota	Chytridiomycetes	xylanase	Hemicellulose	3.2.1.8	Saprotroph	1.05239	3	1	3	3
Phaeozem	GH12	GH	Ascomycota	Dothideomycetes	endo-glucanase	Cellulose	3.2.1.4	Pathotroph	1.60354	17	0.894737	19	20
Phaeozem	GH12	GH	Ascomycota	Eurotiomycetes	endo-glucanase	Cellulose	3.2.1.151	Pathotroph	0.0241588	36	0.654545	55	5
Phaeozem	GH12	GH	Ascomycota	Eurotiomycetes	endo-glucanase	Cellulose	3.2.1.151	Saprotroph	0.0275387	36	0.654545	55	5
Phaeozem	GH12	GH	Ascomycota	Eurotiomycetes	endo-glucanase	Cellulose	3.2.1.151	Symbiotroph	0.0230282	36	0.654545	55	5
Phaeozem	GH12	GH	Ascomycota	Eurotiomycetes	endo-glucanase	Cellulose	3.2.1.4	Pathotroph	1.60354	36	0.654545	55	10
Phaeozem	GH12	GH	Ascomycota	Eurotiomycetes	endo-glucanase	Cellulose	3.2.1.4	Saprotroph	1.82788	36	0.654545	55	10
Phaeozem	GH12	GH	Ascomycota	Eurotiomycetes	endo-glucanase	Cellulose	3.2.1.4	Symbiotroph	1.5285	36	0.654545	55	10
Phaeozem	GH12	GH	Ascomycota	Sordariomycetes	endo-glucanase	Cellulose	3.2.1.4	Pathotroph	1.60354	54	0.529412	102	40
Phaeozem	GH12	GH	Ascomycota	Sordariomycetes	endo-glucanase	Cellulose	3.2.1.4	Symbiotroph	1.5285	54	0.529412	102	40
Phaeozem	GH13	GH	Ascomycota	Eurotiomycetes	alpha-glucosidase	Starch	3.2.1.20	Pathotroph	1.04961	9	0.36	25	37
Phaeozem	GH13	GH	Ascomycota	Eurotiomycetes	alpha-glucosidase	Starch	3.2.1.20	Saprotroph	1.04961	9	0.36	25	37
Phaeozem	GH15	GH	Ascomycota	Eurotiomycetes	exo-glucanase	Cellulose	3.2.1.3	Pathotroph	0.980769	17	0.435897	39	11
Phaeozem	GH15	GH	Ascomycota	Eurotiomycetes	exo-glucanase	Cellulose	3.2.1.3	Saprotroph	0.980769	17	0.435897	39	11
Phaeozem	GH15	GH	Ascomycota	Eurotiomycetes	exo-glucanase	Cellulose	3.2.1.3	Symbiotroph	0.980769	17	0.435897	39	11
Phaeozem	GH15	GH	Ascomycota	Saccharomycetes	exo-glucanase	Cellulose	3.2.1.3	Pathotroph	0.980769	2	0.5	4	4
Phaeozem	GH15	GH	Mucoromycota	Mucoromycetes	exo-glucanase	Cellulose	3.2.1.3	Pathotroph	0.980769	6	0.666667	9	10
Phaeozem	GH16	GH	Ascomycota	Dothideomycetes	endo-glucanase	Cellulose	3.2.1.6	Pathotroph	0.435323	17	0.894737	19	1
Phaeozem	GH16	GH	Ascomycota	Eurotiomycetes	endo-glucanase	Cellulose	3.2.1.39	Pathotroph	3.949	36	0.654545	55	42
Phaeozem	GH16	GH	Ascomycota	Eurotiomycetes	endo-glucanase	Cellulose	3.2.1.39	Saprotroph	1.15876	36	0.654545	55	42
Phaeozem	GH16	GH	Basidiomycota	Ustilaginomycetes	endo-glucanase	Cellulose	3.2.1.39	Pathotroph	1.15876	1	0.333333	3	3
Phaeozem	GH2	GH	Ascomycota	Eurotiomycetes	beta-galactosidase	Hemicellulose	3.2.1.23	Pathotroph	1.07858	22	0.6875	32	39
Phaeozem	GH2	GH	Ascomycota	Eurotiomycetes	beta-galactosidase	Hemicellulose	3.2.1.23	Saprotroph	1.07858	22	0.6875	32	39
Phaeozem	GH2	GH	Ascomycota	Eurotiomycetes	beta-mannosidase	Hemicellulose	3.2.1.25	Pathotroph	1.11685	6	0.222222	27	32
Phaeozem	GH2	GH	Ascomycota	Eurotiomycetes	beta-mannosidase	Hemicellulose	3.2.1.25	Saprotroph	1.11685	6	0.222222	27	32
Phaeozem	GH2	GH	Ascomycota	Sordariomycetes	beta-mannosidase	Hemicellulose	3.2.1.25	Pathotroph	1.11685	7	0.179487	39	48
Phaeozem	GH2	GH	Ascomycota	Sordariomycetes	beta-mannosidase	Hemicellulose	3.2.1.25	Symbiotroph	1.11685	7	0.179487	39	48
Phaeozem	GH26	GH	Ascomycota	Eurotiomycetes	endo-mannanase	Hemicellulose	3.2.1.78	Pathotroph	0.936842	5	1	5	7
Phaeozem	GH26	GH	Ascomycota	Eurotiomycetes	endo-mannanase	Hemicellulose	3.2.1.78	Saprotroph	0.936842	5	1	5	7
Phaeozem	GH27	GH	Ascomycota	Eurotiomycetes	alpha-galactosidase	Starch	3.2.1.22	Pathotroph	1.01653	15	0.384615	39	42
Phaeozem	GH27	GH	Ascomycota	Eurotiomycetes	alpha-galactosidase	Starch	3.2.1.22	Saprotroph	1.01653	15	0.384615	39	42
Phaeozem	GH27	GH	Ascomycota	Eurotiomycetes	alpha-galactosidase	Starch	3.2.1.22	Symbiotroph	1.01653	15	0.384615	39	42
Phaeozem	GH27	GH	Ascomycota	Pichiomycetes	alpha-galactosidase	Starch	3.2.1.22	Saprotroph	1.01653	1	0.5	2	2
Phaeozem	GH27	GH	Ascomycota	Sordariomycetes	alpha-galactosidase	Starch	3.2.1.22	Pathotroph	1.01653	22	0.44898	49	56
Phaeozem	GH27	GH	Ascomycota	Sordariomycetes	alpha-galactosidase	Starch	3.2.1.22	Symbiotroph	1.01653	22	0.44898	49	56
Phaeozem	GH28	GH	Ascomycota	Dothideomycetes	endo-polygalacturonase	Pectin	3.2.1.15	Pathotroph	1.05344	5	1	5	4
Phaeozem	GH28	GH	Ascomycota	Eurotiomycetes	endo-polygalacturonase	Pectin	3.2.1.15	Pathotroph	1.05344	7	0.875	8	13
Phaeozem	GH28	GH	Ascomycota	Eurotiomycetes	endo-polygalacturonase	Pectin	3.2.1.15	Saprotroph	1.05344	7	0.875	8	13
Phaeozem	GH28	GH	Ascomycota	Eurotiomycetes	endo-polygalacturonase	Pectin	3.2.1.15	Symbiotroph	1.05344	7	0.875	8	13
Phaeozem	GH28	GH	Ascomycota	Eurotiomycetes	exo-galacturonase	Pectin	3.2.1.67	Pathotroph	1.08955	10	0.833333	12	13
Phaeozem	GH28	GH	Ascomycota	Eurotiomycetes	exo-galacturonase	Pectin	3.2.1.67	Saprotroph	1.08955	10	0.833333	12	13
Phaeozem	GH28	GH	Ascomycota	Leotiomycetes	endo-polygalacturonase	Pectin	3.2.1.15	Pathotroph	1.05344	5	1	5	5
Phaeozem	GH28	GH	Ascomycota	Sordariomycetes	endo-polygalacturonase	Pectin	3.2.1.15	Pathotroph	1.05344	4	0.666667	6	6
Phaeozem	GH28	GH	Ascomycota	Sordariomycetes	endo-polygalacturonase	Pectin	3.2.1.15	Symbiotroph	1.05344	4	0.666667	6	6
Phaeozem	GH28	GH	Ascomycota	Sordariomycetes	exo-galacturonase	Pectin	3.2.1.67	Pathotroph	1.08955	17	0.944444	18	21
Phaeozem	GH3	GH	Ascomycota	Eurotiomycetes	beta-glucosidase	Cellulose	3.2.1.21	Pathotroph	1.05591	47	0.456311	103	136
Phaeozem	GH3	GH	Ascomycota	Eurotiomycetes	beta-glucosidase	Cellulose	3.2.1.21	Saprotroph	1.05591	47	0.456311	103	136
Phaeozem	GH3	GH	Ascomycota	Eurotiomycetes	beta-glucosidase	Cellulose	3.2.1.21	Symbiotroph	1.05591	47	0.456311	103	136
Phaeozem	GH3	GH	Ascomycota	Eurotiomycetes	xylanase	Hemicellulose	3.2.1.37	Pathotroph	0.756396	28	0.848485	33	17
Phaeozem	GH3	GH	Ascomycota	Eurotiomycetes	xylanase	Hemicellulose	3.2.1.37	Saprotroph	0.490975	28	0.848485	33	17
Phaeozem	GH3	GH	Ascomycota	Eurotiomycetes	xylanase	Hemicellulose	3.2.1.8	Pathotroph	2.56952	28	0.848485	33	14
Phaeozem	GH3	GH	Ascomycota	Eurotiomycetes	xylanase	Hemicellulose	3.2.1.8	Saprotroph	1.66787	28	0.848485	33	14
Phaeozem	GH3	GH	Ascomycota	Leotiomycetes	beta-glucosidase	Cellulose	3.2.1.21	Pathotroph	1.05591	18	0.461538	39	48
Phaeozem	GH3	GH	Ascomycota	Sordariomycetes	beta-glucosidase	Cellulose	3.2.1.21	Pathotroph	1.05591	107	0.406844	263	305
Phaeozem	GH3	GH	Ascomycota	Sordariomycetes	beta-glucosidase	Cellulose	3.2.1.21	Symbiotroph	1.05591	107	0.406844	263	305
Phaeozem	GH3	GH	Ascomycota	Sordariomycetes	xylanase	Hemicellulose	3.2.1.37	Pathotroph	0.756396	72	0.935065	77	16
Phaeozem	GH3	GH	Ascomycota	Sordariomycetes	xylanase	Hemicellulose	3.2.1.37	Symbiotroph	1.18261	72	0.935065	77	16
Phaeozem	GH3	GH	Basidiomycota	Ustilaginomycetes	beta-glucosidase	Cellulose	3.2.1.21	Pathotroph	1.05591	2	0.666667	3	5
Phaeozem	GH3	GH	Mucoromycota	Mucoromycetes	beta-glucosidase	Cellulose	3.2.1.21	Pathotroph	1.05591	13	0.65	20	25
Phaeozem	GH30	GH	Ascomycota	Eurotiomycetes	endo-glucanase	Cellulose	3.2.1.75	Pathotroph	0.909091	36	0.654545	55	5
Phaeozem	GH30	GH	Ascomycota	Eurotiomycetes	endo-glucanase	Cellulose	3.2.1.75	Saprotroph	0.909091	36	0.654545	55	5
Phaeozem	GH30	GH	Ascomycota	Eurotiomycetes	xylanase	Hemicellulose	3.2.1.8	Pathotroph	1.05239	28	0.848485	33	14
Phaeozem	GH30	GH	Ascomycota	Sordariomycetes	endo-glucanase	Cellulose	3.2.1.75	Pathotroph	0.909091	54	0.529412	102	3
Phaeozem	GH30	GH	Ascomycota	Sordariomycetes	endo-glucanase	Cellulose	3.2.1.75	Symbiotroph	0.909091	54	0.529412	102	3
Phaeozem	GH31	GH	Ascomycota	Eurotiomycetes	alpha-glucosidase	Starch	3.2.1.20	Pathotroph	1.04961	9	0.36	25	37
Phaeozem	GH31	GH	Ascomycota	Eurotiomycetes	alpha-glucosidase	Starch	3.2.1.20	Saprotroph	1.04961	9	0.36	25	37
Phaeozem	GH35	GH	Ascomycota	Eurotiomycetes	beta-galactosidase	Hemicellulose	3.2.1.23	Pathotroph	1.07858	22	0.6875	32	39
Phaeozem	GH35	GH	Ascomycota	Eurotiomycetes	beta-galactosidase	Hemicellulose	3.2.1.23	Saprotroph	1.07858	22	0.6875	32	39
Phaeozem	GH35	GH	Ascomycota	Eurotiomycetes	beta-galactosidase	Hemicellulose	3.2.1.23	Symbiotroph	1.07858	22	0.6875	32	39
Phaeozem	GH35	GH	Ascomycota	Sordariomycetes	beta-galactosidase	Hemicellulose	3.2.1.23	Pathotroph	1.07858	30	0.566038	53	61
Phaeozem	GH35	GH	Ascomycota	Sordariomycetes	beta-galactosidase	Hemicellulose	3.2.1.23	Symbiotroph	1.07858	30	0.566038	53	61
Phaeozem	GH36	GH	Ascomycota	Eurotiomycetes	alpha-galactosidase	Starch	3.2.1.22	Pathotroph	1.01653	15	0.384615	39	42
Phaeozem	GH36	GH	Ascomycota	Eurotiomycetes	alpha-galactosidase	Starch	3.2.1.22	Saprotroph	1.01653	15	0.384615	39	42
Phaeozem	GH36	GH	Ascomycota	Eurotiomycetes	alpha-galactosidase	Starch	3.2.1.22	Symbiotroph	1.01653	15	0.384615	39	42
Phaeozem	GH36	GH	Ascomycota	Sordariomycetes	alpha-galactosidase	Starch	3.2.1.22	Pathotroph	1.01653	22	0.44898	49	56
Phaeozem	GH36	GH	Ascomycota	Sordariomycetes	alpha-galactosidase	Starch	3.2.1.22	Symbiotroph	1.01653	22	0.44898	49	56
Phaeozem	GH36	GH	Mucoromycota	Mucoromycetes	alpha-galactosidase	Starch	3.2.1.22	Pathotroph	1.01653	2	0.181818	11	14
Phaeozem	GH43	GH	Ascomycota	Dothideomycetes	xylanase	Hemicellulose	3.2.1.37	Pathotroph	1.18261	35	0.875	40	13
Phaeozem	GH43	GH	Ascomycota	Eurotiomycetes	arabinofuranosidase	Hemicellulose	3.2.1.55	Pathotroph	1.13443	7	0.411765	17	22
Phaeozem	GH43	GH	Ascomycota	Eurotiomycetes	arabinofuranosidase	Hemicellulose	3.2.1.55	Symbiotroph	1.13443	7	0.411765	17	22
Phaeozem	GH43	GH	Ascomycota	Eurotiomycetes	xylanase	Hemicellulose	3.2.1.37	Pathotroph	1.18261	28	0.848485	33	17
Phaeozem	GH43	GH	Ascomycota	Eurotiomycetes	xylanase	Hemicellulose	3.2.1.37	Saprotroph	1.18261	28	0.848485	33	17
Phaeozem	GH43	GH	Ascomycota	Eurotiomycetes	xylanase	Hemicellulose	3.2.1.37	Symbiotroph	1.18261	28	0.848485	33	17
Phaeozem	GH45	GH	Ascomycota	Eurotiomycetes	endo-glucanase	Cellulose	3.2.1.4	Pathotroph	0.923478	36	0.654545	55	10
Phaeozem	GH45	GH	Ascomycota	Eurotiomycetes	endo-glucanase	Cellulose	3.2.1.4	Symbiotroph	0.923478	36	0.654545	55	10
Phaeozem	GH45	GH	Ascomycota	Sordariomycetes	endo-glucanase	Cellulose	3.2.1.4	Pathotroph	0.923478	54	0.529412	102	40
Phaeozem	GH45	GH	Ascomycota	Sordariomycetes	endo-glucanase	Cellulose	3.2.1.4	Symbiotroph	0.923478	54	0.529412	102	40
Phaeozem	GH45	GH	Chytridiomycota	Chytridiomycetes	endo-glucanase	Cellulose	3.2.1.4	Saprotroph	0.923478	4	1	4	4
Phaeozem	GH45	GH	Mucoromycota	Mucoromycetes	endo-glucanase	Cellulose	3.2.1.4	Pathotroph	0.923478	4	0.5	8	9
Phaeozem	GH47	GH	Ascomycota	Eurotiomycetes	alpha-mannosidase	Starch	3.2.1.113	Pathotroph	0.75	1	1	1	2
Phaeozem	GH47	GH	Ascomycota	Eurotiomycetes	alpha-mannosidase	Starch	3.2.1.113	Saprotroph	0.75	1	1	1	2
Phaeozem	GH47	GH	Ascomycota	Eurotiomycetes	alpha-mannosidase	Starch	3.2.1.113	Symbiotroph	0.75	1	1	1	2
Phaeozem	GH5	GH	Ascomycota	Dothideomycetes	exo-glucanase	Cellulose	3.2.1.58	Pathotroph	1.03665	13	0.40625	32	42
Phaeozem	GH5	GH	Ascomycota	Eurotiomycetes	endo-glucanase	Cellulose	3.2.1.4	Pathotroph	1.35922	36	0.654545	55	10
Phaeozem	GH5	GH	Ascomycota	Eurotiomycetes	endo-glucanase	Cellulose	3.2.1.4	Saprotroph	1.77889	36	0.654545	55	10
Phaeozem	GH5	GH	Ascomycota	Eurotiomycetes	endo-glucanase	Cellulose	3.2.1.4	Symbiotroph	1.35922	36	0.654545	55	10
Phaeozem	GH5	GH	Ascomycota	Eurotiomycetes	endo-glucanase	Cellulose	3.2.1.75	Pathotroph	0.0511945	36	0.654545	55	5
Phaeozem	GH5	GH	Ascomycota	Eurotiomycetes	endo-glucanase	Cellulose	3.2.1.75	Saprotroph	0.0670017	36	0.654545	55	5
Phaeozem	GH5	GH	Ascomycota	Eurotiomycetes	endo-mannanase	Hemicellulose	3.2.1.78	Pathotroph	0.936842	5	1	5	7
Phaeozem	GH5	GH	Ascomycota	Eurotiomycetes	endo-mannanase	Hemicellulose	3.2.1.78	Saprotroph	0.936842	5	1	5	7
Phaeozem	GH5	GH	Ascomycota	Eurotiomycetes	endo-mannanase	Hemicellulose	3.2.1.78	Symbiotroph	0.936842	5	1	5	7
Phaeozem	GH5	GH	Ascomycota	Eurotiomycetes	exo-glucanase	Cellulose	3.2.1.58	Pathotroph	1.03665	17	0.435897	39	34
Phaeozem	GH5	GH	Ascomycota	Eurotiomycetes	exo-glucanase	Cellulose	3.2.1.58	Saprotroph	1.03665	17	0.435897	39	34
Phaeozem	GH5	GH	Ascomycota	Sordariomycetes	endo-glucanase	Cellulose	3.2.1.4	Pathotroph	1.35922	54	0.529412	102	40
Phaeozem	GH5	GH	Ascomycota	Sordariomycetes	endo-glucanase	Cellulose	3.2.1.4	Symbiotroph	1.35922	54	0.529412	102	40
Phaeozem	GH5	GH	Ascomycota	Sordariomycetes	endo-glucanase	Cellulose	3.2.1.75	Pathotroph	0.0511945	54	0.529412	102	3
Phaeozem	GH5	GH	Ascomycota	Sordariomycetes	endo-glucanase	Cellulose	3.2.1.75	Symbiotroph	0.0511945	54	0.529412	102	3
Phaeozem	GH5	GH	Ascomycota	Sordariomycetes	endo-mannanase	Hemicellulose	3.2.1.78	Pathotroph	0.936842	10	0.833333	12	16
Phaeozem	GH5	GH	Ascomycota	Sordariomycetes	endo-mannanase	Hemicellulose	3.2.1.78	Symbiotroph	0.936842	10	0.833333	12	16
Phaeozem	GH5	GH	Basidiomycota	Agaricomycetes	endo-mannanase	Hemicellulose	3.2.1.78	Saprotroph	0.936842	22	0.88	25	41
Phaeozem	GH5	GH	Basidiomycota	Tremellomycetes	endo-glucanase	Cellulose	3.2.1.4	Pathotroph	0.923478	1	1	1	1
Phaeozem	GH51	GH	Ascomycota	Eurotiomycetes	arabinofuranosidase	Hemicellulose	3.2.1.55	Pathotroph	1.13443	7	0.411765	17	22
Phaeozem	GH51	GH	Ascomycota	Eurotiomycetes	arabinofuranosidase	Hemicellulose	3.2.1.55	Saprotroph	1.13443	7	0.411765	17	22
Phaeozem	GH51	GH	Ascomycota	Eurotiomycetes	arabinofuranosidase	Hemicellulose	3.2.1.55	Symbiotroph	1.13443	7	0.411765	17	22
Phaeozem	GH53	GH	Ascomycota	Eurotiomycetes	endo-galactanase	Hemicellulose	3.2.1.89	Pathotroph	1.11111	2	0.5	4	5
Phaeozem	GH53	GH	Ascomycota	Eurotiomycetes	endo-galactanase	Hemicellulose	3.2.1.89	Saprotroph	1.11111	2	0.5	4	5
Phaeozem	GH53	GH	Ascomycota	Eurotiomycetes	endo-galactanase	Hemicellulose	3.2.1.89	Symbiotroph	1.11111	2	0.5	4	5
Phaeozem	GH54	GH	Ascomycota	Eurotiomycetes	arabinofuranosidase	Hemicellulose	3.2.1.55	Pathotroph	1.13443	7	0.411765	17	22
Phaeozem	GH54	GH	Ascomycota	Eurotiomycetes	arabinofuranosidase	Hemicellulose	3.2.1.55	Saprotroph	1.13443	7	0.411765	17	22
Phaeozem	GH54	GH	Ascomycota	Eurotiomycetes	arabinofuranosidase	Hemicellulose	3.2.1.55	Symbiotroph	1.13443	7	0.411765	17	22
Phaeozem	GH54	GH	Ascomycota	Sordariomycetes	arabinofuranosidase	Hemicellulose	3.2.1.55	Pathotroph	1.13443	35	0.833333	42	43
Phaeozem	GH54	GH	Ascomycota	Sordariomycetes	arabinofuranosidase	Hemicellulose	3.2.1.55	Symbiotroph	1.13443	35	0.833333	42	43
Phaeozem	GH54	GH	Ascomycota	Sordariomycetes	xylanase	Hemicellulose	3.2.1.37	Pathotroph	1.18261	72	0.935065	77	16
Phaeozem	GH54	GH	Ascomycota	Sordariomycetes	xylanase	Hemicellulose	3.2.1.37	Symbiotroph	1.18261	72	0.935065	77	16
Phaeozem	GH55	GH	Ascomycota	Dothideomycetes	exo-glucanase	Cellulose	3.2.1.58	Pathotroph	1.03665	13	0.40625	32	42
Phaeozem	GH55	GH	Ascomycota	Eurotiomycetes	exo-glucanase	Cellulose	3.2.1.58	Pathotroph	1.03665	17	0.435897	39	34
Phaeozem	GH55	GH	Ascomycota	Eurotiomycetes	exo-glucanase	Cellulose	3.2.1.58	Saprotroph	1.03665	17	0.435897	39	34
Phaeozem	GH55	GH	Ascomycota	Eurotiomycetes	exo-glucanase	Cellulose	3.2.1.58	Symbiotroph	1.03665	17	0.435897	39	34
Phaeozem	GH55	GH	Ascomycota	Sordariomycetes	endo-glucanase	Cellulose	3.2.1.39	Pathotroph	1.15876	54	0.529412	102	81
Phaeozem	GH55	GH	Ascomycota	Sordariomycetes	endo-glucanase	Cellulose	3.2.1.39	Symbiotroph	1.15876	54	0.529412	102	81
Phaeozem	GH55	GH	Ascomycota	Sordariomycetes	exo-glucanase	Cellulose	3.2.1.58	Pathotroph	1.03665	5	0.172414	29	33
Phaeozem	GH55	GH	Ascomycota	Sordariomycetes	exo-glucanase	Cellulose	3.2.1.58	Symbiotroph	1.03665	5	0.172414	29	33
Phaeozem	GH6	GH	Ascomycota	Sordariomycetes	cellobiohydrolase	Cellulose	3.2.1.91	Pathotroph	1.03704	1	1	1	1
Phaeozem	GH6	GH	Ascomycota	Sordariomycetes	cellobiohydrolase	Cellulose	3.2.1.91	Symbiotroph	1.03704	1	1	1	1
Phaeozem	GH6	GH	Basidiomycota	Agaricomycetes	cellobiohydrolase	Cellulose	3.2.1.91	Saprotroph	1.03704	3	0.6	5	9
Phaeozem	GH62	GH	Ascomycota	Eurotiomycetes	arabinofuranosidase	Hemicellulose	3.2.1.55	Pathotroph	1.13443	7	0.411765	17	22
Phaeozem	GH62	GH	Ascomycota	Eurotiomycetes	arabinofuranosidase	Hemicellulose	3.2.1.55	Saprotroph	1.13443	7	0.411765	17	22
Phaeozem	GH62	GH	Ascomycota	Eurotiomycetes	arabinofuranosidase	Hemicellulose	3.2.1.55	Symbiotroph	1.13443	7	0.411765	17	22
Phaeozem	GH62	GH	Ascomycota	Sordariomycetes	arabinofuranosidase	Hemicellulose	3.2.1.55	Pathotroph	1.13443	35	0.833333	42	43
Phaeozem	GH62	GH	Ascomycota	Sordariomycetes	arabinofuranosidase	Hemicellulose	3.2.1.55	Symbiotroph	1.13443	35	0.833333	42	43
Phaeozem	GH62	GH	Basidiomycota	Agaricomycetes	arabinofuranosidase	Hemicellulose	3.2.1.55	Saprotroph	1.13443	31	0.607843	51	60
Phaeozem	GH7	GH	Ascomycota	Eurotiomycetes	endo-glucanase	Cellulose	3.2.1.4	Pathotroph	0.923478	36	0.654545	55	10
Phaeozem	GH7	GH	Ascomycota	Eurotiomycetes	endo-glucanase	Cellulose	3.2.1.4	Saprotroph	0.923478	36	0.654545	55	10
Phaeozem	GH7	GH	Ascomycota	Eurotiomycetes	endo-glucanase	Cellulose	3.2.1.4	Symbiotroph	0.923478	36	0.654545	55	10
Phaeozem	GH7	GH	Ascomycota	Sordariomycetes	endo-glucanase	Cellulose	3.2.1.4	Pathotroph	0.923478	54	0.529412	102	40
Phaeozem	GH7	GH	Ascomycota	Sordariomycetes	endo-glucanase	Cellulose	3.2.1.4	Symbiotroph	0.923478	54	0.529412	102	40
Phaeozem	GH74	GH	Ascomycota	Eurotiomycetes	cellobiohydrolase	Cellulose	3.2.1.150	Pathotroph	1	1	1	1	1
Phaeozem	GH74	GH	Ascomycota	Eurotiomycetes	cellobiohydrolase	Cellulose	3.2.1.150	Saprotroph	1	1	1	1	1
Phaeozem	GH74	GH	Ascomycota	Eurotiomycetes	endo-glucanase	Cellulose	3.2.1.151	Pathotroph	1.33333	36	0.654545	55	5
Phaeozem	GH74	GH	Ascomycota	Eurotiomycetes	endo-glucanase	Cellulose	3.2.1.151	Saprotroph	1.33333	36	0.654545	55	5
Phaeozem	GH81	GH	Ascomycota	Eurotiomycetes	endo-glucanase	Cellulose	3.2.1.39	Pathotroph	1.15876	36	0.654545	55	42
Phaeozem	GH81	GH	Ascomycota	Eurotiomycetes	endo-glucanase	Cellulose	3.2.1.39	Saprotroph	1.15876	36	0.654545	55	42
Podzol	AA1	AA	Ascomycota	Eurotiomycetes	laccase	Lignin	1.10.3.2	Pathotroph	1.23226	3	1	3	4
Podzol	AA1	AA	Ascomycota	Eurotiomycetes	laccase	Lignin	1.10.3.2	Saprotroph	1.23226	3	1	3	4
Podzol	AA1	AA	Ascomycota	Leotiomycetes	laccase	Lignin	1.10.3.2	Pathotroph	1.23226	0	0	1	2
Podzol	AA1	AA	Ascomycota	Sordariomycetes	laccase	Lignin	1.10.3.2	Pathotroph	1.23226	17	0.894737	19	23
Podzol	AA1	AA	Basidiomycota	Agaricomycetes	laccase	Lignin	1.10.3.2	Saprotroph	1.23226	35	0.686275	51	59
Podzol	AA3	AA	Ascomycota	Eurotiomycetes	glucose oxidase	Lignocellulose- associated H₂O₂	1.1.3.4	Pathotroph	1.25	39	0.795918	49	53
Podzol	AA3	AA	Ascomycota	Eurotiomycetes	glucose oxidase	Lignocellulose- associated H₂O₂	1.1.3.4	Saprotroph	1.25	39	0.795918	49	53
Podzol	AA3	AA	Ascomycota	Eurotiomycetes	glucose oxidase	Lignocellulose- associated H₂O₂	1.1.3.4	Symbiotroph	1.25	39	0.795918	49	53
Podzol	AA3	AA	Basidiomycota	Agaricomycetes	pyranose:acceptor oxidoreductase	Lignocellulose- associated H₂O₂	1.1.99.29	Saprotroph	0.88961	95	0.678571	140	185
Podzol	AA5	AA	Ascomycota	Sordariomycetes	alcohol oxidase	Lignocellulose- associated H₂O₂	1.1.3.13	Pathotroph	0.785714	1	1	1	2
Podzol	AA9	AA	Ascomycota	Eurotiomycetes	LPMO	Cellulose	1.14.99.56	Pathotroph	1.24465	10	1	10	10
Podzol	AA9	AA	Ascomycota	Eurotiomycetes	LPMO	Cellulose	1.14.99.56	Saprotroph	1.24465	10	1	10	10
Podzol	AA9	AA	Ascomycota	Sordariomycetes	LPMO	Cellulose	1.14.99.56	Pathotroph	1.24465	127	0.907143	140	151
Podzol	AA9	AA	Ascomycota	Sordariomycetes	LPMO	Cellulose	1.14.99.56	Symbiotroph	1.24465	127	0.907143	140	151
Podzol	CE1	CE	Basidiomycota	Agaricomycetes	acetylxylan/feruloyl esterase	Hemicellulose	3.1.1.73	Saprotroph	1.69412	3	0.75	4	4
Podzol	CE8	CE	Ascomycota	Eurotiomycetes	endo-polygalacturonase	Pectin	3.2.1.15	Pathotroph	1.12745	9	0.9	10	12
Podzol	CE8	CE	Ascomycota	Eurotiomycetes	endo-polygalacturonase	Pectin	3.2.1.15	Symbiotroph	1.12745	9	0.9	10	12
Podzol	GH1	GH	Ascomycota	Eurotiomycetes	beta-glucosidase	Cellulose	3.2.1.21	Pathotroph	1.03185	58	0.353659	164	204
Podzol	GH1	GH	Ascomycota	Eurotiomycetes	beta-glucosidase	Cellulose	3.2.1.21	Saprotroph	1.03185	58	0.353659	164	204
Podzol	GH1	GH	Ascomycota	Eurotiomycetes	beta-glucosidase	Cellulose	3.2.1.21	Symbiotroph	1.03185	58	0.353659	164	204
Podzol	GH1	GH	Ascomycota	Sordariomycetes	beta-glucosidase	Cellulose	3.2.1.21	Pathotroph	1.03185	137	0.384831	356	423
Podzol	GH1	GH	Ascomycota	Sordariomycetes	beta-glucosidase	Cellulose	3.2.1.21	Symbiotroph	1.03185	137	0.384831	356	423
Podzol	GH10	GH	Ascomycota	Eurotiomycetes	xylanase	Hemicellulose	3.2.1.8	Pathotroph	1.09524	20	0.909091	22	13
Podzol	GH10	GH	Ascomycota	Eurotiomycetes	xylanase	Hemicellulose	3.2.1.8	Saprotroph	1.09524	20	0.909091	22	13
Podzol	GH10	GH	Ascomycota	Eurotiomycetes	xylanase	Hemicellulose	3.2.1.8	Symbiotroph	1.09524	20	0.909091	22	13
Podzol	GH10	GH	Ascomycota	Sordariomycetes	xylanase	Hemicellulose	3.2.1.8	Pathotroph	1.09524	77	0.865169	89	69
Podzol	GH10	GH	Ascomycota	Sordariomycetes	xylanase	Hemicellulose	3.2.1.8	Symbiotroph	1.09524	77	0.865169	89	69
Podzol	GH10	GH	Basidiomycota	Agaricomycetes	xylanase	Hemicellulose	3.2.1.8	Saprotroph	1.09524	28	0.8	35	45
Podzol	GH11	GH	Ascomycota	Dothideomycetes	xylanase	Hemicellulose	3.2.1.8	Pathotroph	1.09524	38	0.844444	45	38
Podzol	GH11	GH	Ascomycota	Eurotiomycetes	xylanase	Hemicellulose	3.2.1.8	Pathotroph	1.09524	20	0.909091	22	13
Podzol	GH11	GH	Ascomycota	Eurotiomycetes	xylanase	Hemicellulose	3.2.1.8	Saprotroph	1.09524	20	0.909091	22	13
Podzol	GH11	GH	Ascomycota	Eurotiomycetes	xylanase	Hemicellulose	3.2.1.8	Symbiotroph	1.09524	20	0.909091	22	13
Podzol	GH11	GH	Ascomycota	Leotiomycetes	xylanase	Hemicellulose	3.2.1.8	Pathotroph	1.09524	8	0.888889	9	9
Podzol	GH11	GH	Ascomycota	Sordariomycetes	xylanase	Hemicellulose	3.2.1.8	Pathotroph	1.09524	77	0.865169	89	69
Podzol	GH11	GH	Ascomycota	Sordariomycetes	xylanase	Hemicellulose	3.2.1.8	Symbiotroph	1.09524	77	0.865169	89	69
Podzol	GH11	GH	Basidiomycota	Agaricomycetes	xylanase	Hemicellulose	3.2.1.8	Saprotroph	1.09524	28	0.8	35	45
Podzol	GH11	GH	Chytridiomycota	Chytridiomycetes	xylanase	Hemicellulose	3.2.1.8	Saprotroph	1.09524	2	1	2	2
Podzol	GH12	GH	Ascomycota	Dothideomycetes	endo-glucanase	Cellulose	3.2.1.4	Pathotroph	1.93608	7	1	7	10
Podzol	GH12	GH	Ascomycota	Eurotiomycetes	endo-glucanase	Cellulose	3.2.1.151	Pathotroph	0.0244044	40	0.645161	62	3
Podzol	GH12	GH	Ascomycota	Eurotiomycetes	endo-glucanase	Cellulose	3.2.1.151	Saprotroph	0.0278422	40	0.645161	62	3
Podzol	GH12	GH	Ascomycota	Eurotiomycetes	endo-glucanase	Cellulose	3.2.1.151	Symbiotroph	0.0232558	40	0.645161	62	3
Podzol	GH12	GH	Ascomycota	Eurotiomycetes	endo-glucanase	Cellulose	3.2.1.4	Pathotroph	1.93608	40	0.645161	62	14
Podzol	GH12	GH	Ascomycota	Eurotiomycetes	endo-glucanase	Cellulose	3.2.1.4	Saprotroph	2.20882	40	0.645161	62	14
Podzol	GH12	GH	Ascomycota	Eurotiomycetes	endo-glucanase	Cellulose	3.2.1.4	Symbiotroph	1.84496	40	0.645161	62	14
Podzol	GH12	GH	Ascomycota	Sordariomycetes	endo-glucanase	Cellulose	3.2.1.4	Pathotroph	1.93608	63	0.477273	132	38
Podzol	GH12	GH	Ascomycota	Sordariomycetes	endo-glucanase	Cellulose	3.2.1.4	Symbiotroph	1.84496	63	0.477273	132	38
Podzol	GH13	GH	Ascomycota	Eurotiomycetes	alpha-glucosidase	Starch	3.2.1.20	Pathotroph	1.06509	22	0.536585	41	60
Podzol	GH13	GH	Ascomycota	Eurotiomycetes	alpha-glucosidase	Starch	3.2.1.20	Saprotroph	1.06509	22	0.536585	41	60
Podzol	GH15	GH	Ascomycota	Eurotiomycetes	exo-glucanase	Cellulose	3.2.1.3	Pathotroph	1.08824	35	0.546875	64	16
Podzol	GH15	GH	Ascomycota	Eurotiomycetes	exo-glucanase	Cellulose	3.2.1.3	Saprotroph	1.08824	35	0.546875	64	16
Podzol	GH15	GH	Ascomycota	Eurotiomycetes	exo-glucanase	Cellulose	3.2.1.3	Symbiotroph	1.08824	35	0.546875	64	16
Podzol	GH15	GH	Basidiomycota	Agaricomycetes	exo-glucanase	Cellulose	3.2.1.3	Symbiotroph	1.08824	14	0.736842	19	24
Podzol	GH15	GH	Mucoromycota	Mucoromycetes	exo-glucanase	Cellulose	3.2.1.3	Pathotroph	1.08824	6	0.857143	7	7
Podzol	GH16	GH	Ascomycota	Eurotiomycetes	endo-glucanase	Cellulose	3.2.1.39	Pathotroph	3.1335	40	0.645161	62	40
Podzol	GH16	GH	Ascomycota	Eurotiomycetes	endo-glucanase	Cellulose	3.2.1.39	Saprotroph	0.988304	40	0.645161	62	40
Podzol	GH16	GH	Ascomycota	Eurotiomycetes	endo-glucanase	Cellulose	3.2.1.6	Pathotroph	0.0432633	40	0.645161	62	7
Podzol	GH2	GH	Ascomycota	Eurotiomycetes	beta-galactosidase	Hemicellulose	3.2.1.23	Pathotroph	1.09815	36	0.679245	53	62
Podzol	GH2	GH	Ascomycota	Eurotiomycetes	beta-galactosidase	Hemicellulose	3.2.1.23	Saprotroph	1.09815	36	0.679245	53	62
Podzol	GH2	GH	Ascomycota	Eurotiomycetes	beta-mannosidase	Hemicellulose	3.2.1.25	Pathotroph	1.16368	5	0.172414	29	33
Podzol	GH2	GH	Ascomycota	Eurotiomycetes	beta-mannosidase	Hemicellulose	3.2.1.25	Saprotroph	1.16368	5	0.172414	29	33
Podzol	GH2	GH	Ascomycota	Sordariomycetes	beta-mannosidase	Hemicellulose	3.2.1.25	Pathotroph	1.16368	9	0.130435	69	85
Podzol	GH2	GH	Ascomycota	Sordariomycetes	beta-mannosidase	Hemicellulose	3.2.1.25	Symbiotroph	1.16368	9	0.130435	69	85
Podzol	GH26	GH	Ascomycota	Dothideomycetes	endo-mannanase	Hemicellulose	3.2.1.78	Saprotroph	0.892655	7	0.7	10	13
Podzol	GH26	GH	Ascomycota	Eurotiomycetes	endo-mannanase	Hemicellulose	3.2.1.78	Pathotroph	0.892655	6	1	6	8
Podzol	GH26	GH	Ascomycota	Eurotiomycetes	endo-mannanase	Hemicellulose	3.2.1.78	Saprotroph	0.892655	6	1	6	8
Podzol	GH27	GH	Ascomycota	Eurotiomycetes	alpha-galactosidase	Starch	3.2.1.22	Pathotroph	1.18257	26	0.52	50	61
Podzol	GH27	GH	Ascomycota	Eurotiomycetes	alpha-galactosidase	Starch	3.2.1.22	Saprotroph	1.18257	26	0.52	50	61
Podzol	GH27	GH	Ascomycota	Eurotiomycetes	alpha-galactosidase	Starch	3.2.1.22	Symbiotroph	1.18257	26	0.52	50	61
Podzol	GH27	GH	Ascomycota	Pichiomycetes	alpha-galactosidase	Starch	3.2.1.22	Saprotroph	1.18257	0	0	1	1
Podzol	GH27	GH	Ascomycota	Sordariomycetes	alpha-galactosidase	Starch	3.2.1.22	Pathotroph	1.18257	52	0.565217	92	107
Podzol	GH27	GH	Ascomycota	Sordariomycetes	alpha-galactosidase	Starch	3.2.1.22	Symbiotroph	1.18257	52	0.565217	92	107
Podzol	GH27	GH	Mucoromycota	Umbelopsidomycetes	alpha-galactosidase	Starch	3.2.1.22	Saprotroph	1.18257	0	0	1	1
Podzol	GH28	GH	Ascomycota	Dothideomycetes	endo-polygalacturonase	Pectin	3.2.1.15	Pathotroph	1.12745	13	0.928571	14	18
Podzol	GH28	GH	Ascomycota	Eurotiomycetes	endo-polygalacturonase	Pectin	3.2.1.15	Pathotroph	1.12745	9	0.9	10	12
Podzol	GH28	GH	Ascomycota	Eurotiomycetes	endo-polygalacturonase	Pectin	3.2.1.15	Saprotroph	1.12745	9	0.9	10	12
Podzol	GH28	GH	Ascomycota	Eurotiomycetes	endo-polygalacturonase	Pectin	3.2.1.15	Symbiotroph	1.12745	9	0.9	10	12
Podzol	GH28	GH	Ascomycota	Eurotiomycetes	exo-galacturonase	Pectin	3.2.1.67	Pathotroph	0.992593	12	0.857143	14	15
Podzol	GH28	GH	Ascomycota	Eurotiomycetes	exo-galacturonase	Pectin	3.2.1.67	Saprotroph	0.992593	12	0.857143	14	15
Podzol	GH28	GH	Ascomycota	Leotiomycetes	endo-polygalacturonase	Pectin	3.2.1.15	Pathotroph	1.12745	4	1	4	3
Podzol	GH28	GH	Ascomycota	Sordariomycetes	endo-polygalacturonase	Pectin	3.2.1.15	Pathotroph	1.12745	8	0.888889	9	11
Podzol	GH28	GH	Ascomycota	Sordariomycetes	endo-polygalacturonase	Pectin	3.2.1.15	Symbiotroph	1.12745	8	0.888889	9	11
Podzol	GH28	GH	Ascomycota	Sordariomycetes	exo-galacturonase	Pectin	3.2.1.67	Pathotroph	0.992593	23	0.884615	26	29
Podzol	GH3	GH	Ascomycota	Eurotiomycetes	beta-glucosidase	Cellulose	3.2.1.21	Pathotroph	1.03185	58	0.353659	164	204
Podzol	GH3	GH	Ascomycota	Eurotiomycetes	beta-glucosidase	Cellulose	3.2.1.21	Saprotroph	1.03185	58	0.353659	164	204
Podzol	GH3	GH	Ascomycota	Eurotiomycetes	beta-glucosidase	Cellulose	3.2.1.21	Symbiotroph	1.03185	58	0.353659	164	204
Podzol	GH3	GH	Ascomycota	Eurotiomycetes	xylanase	Hemicellulose	3.2.1.37	Pathotroph	0.707491	20	0.909091	22	13
Podzol	GH3	GH	Ascomycota	Eurotiomycetes	xylanase	Hemicellulose	3.2.1.37	Saprotroph	0.497908	20	0.909091	22	13
Podzol	GH3	GH	Ascomycota	Eurotiomycetes	xylanase	Hemicellulose	3.2.1.8	Pathotroph	2.32461	20	0.909091	22	13
Podzol	GH3	GH	Ascomycota	Eurotiomycetes	xylanase	Hemicellulose	3.2.1.8	Saprotroph	1.63598	20	0.909091	22	13
Podzol	GH3	GH	Ascomycota	Leotiomycetes	beta-glucosidase	Cellulose	3.2.1.21	Pathotroph	1.03185	22	0.338462	65	71
Podzol	GH3	GH	Ascomycota	Sordariomycetes	beta-glucosidase	Cellulose	3.2.1.21	Pathotroph	1.03185	137	0.384831	356	423
Podzol	GH3	GH	Ascomycota	Sordariomycetes	beta-glucosidase	Cellulose	3.2.1.21	Symbiotroph	1.03185	137	0.384831	356	423
Podzol	GH3	GH	Ascomycota	Sordariomycetes	xylanase	Hemicellulose	3.2.1.37	Pathotroph	0.707491	77	0.865169	89	32
Podzol	GH3	GH	Ascomycota	Sordariomycetes	xylanase	Hemicellulose	3.2.1.37	Symbiotroph	0.983471	77	0.865169	89	32
Podzol	GH3	GH	Mucoromycota	Mucoromycetes	beta-glucosidase	Cellulose	3.2.1.21	Pathotroph	1.03185	12	0.666667	18	23
Podzol	GH30	GH	Ascomycota	Eurotiomycetes	endo-glucanase	Cellulose	3.2.1.75	Pathotroph	0.821429	40	0.645161	62	5
Podzol	GH30	GH	Ascomycota	Eurotiomycetes	endo-glucanase	Cellulose	3.2.1.75	Saprotroph	0.821429	40	0.645161	62	5
Podzol	GH30	GH	Ascomycota	Eurotiomycetes	xylanase	Hemicellulose	3.2.1.8	Pathotroph	1.09524	20	0.909091	22	13
Podzol	GH30	GH	Ascomycota	Sordariomycetes	endo-glucanase	Cellulose	3.2.1.75	Pathotroph	0.821429	63	0.477273	132	11
Podzol	GH30	GH	Ascomycota	Sordariomycetes	endo-glucanase	Cellulose	3.2.1.75	Symbiotroph	0.821429	63	0.477273	132	11
Podzol	GH31	GH	Ascomycota	Eurotiomycetes	alpha-glucosidase	Starch	3.2.1.20	Pathotroph	1.06509	22	0.536585	41	60
Podzol	GH31	GH	Ascomycota	Eurotiomycetes	alpha-glucosidase	Starch	3.2.1.20	Saprotroph	1.06509	22	0.536585	41	60
Podzol	GH35	GH	Ascomycota	Eurotiomycetes	beta-galactosidase	Hemicellulose	3.2.1.23	Pathotroph	1.09815	36	0.679245	53	62
Podzol	GH35	GH	Ascomycota	Eurotiomycetes	beta-galactosidase	Hemicellulose	3.2.1.23	Saprotroph	1.09815	36	0.679245	53	62
Podzol	GH35	GH	Ascomycota	Eurotiomycetes	beta-galactosidase	Hemicellulose	3.2.1.23	Symbiotroph	1.09815	36	0.679245	53	62
Podzol	GH35	GH	Ascomycota	Sordariomycetes	beta-galactosidase	Hemicellulose	3.2.1.23	Pathotroph	1.09815	55	0.55	100	115
Podzol	GH35	GH	Ascomycota	Sordariomycetes	beta-galactosidase	Hemicellulose	3.2.1.23	Symbiotroph	1.09815	55	0.55	100	115
Podzol	GH36	GH	Ascomycota	Eurotiomycetes	alpha-galactosidase	Starch	3.2.1.22	Pathotroph	1.18257	26	0.52	50	61
Podzol	GH36	GH	Ascomycota	Eurotiomycetes	alpha-galactosidase	Starch	3.2.1.22	Saprotroph	1.18257	26	0.52	50	61
Podzol	GH36	GH	Ascomycota	Eurotiomycetes	alpha-galactosidase	Starch	3.2.1.22	Symbiotroph	1.18257	26	0.52	50	61
Podzol	GH36	GH	Ascomycota	Sordariomycetes	alpha-galactosidase	Starch	3.2.1.22	Pathotroph	1.18257	52	0.565217	92	107
Podzol	GH36	GH	Ascomycota	Sordariomycetes	alpha-galactosidase	Starch	3.2.1.22	Symbiotroph	1.18257	52	0.565217	92	107
Podzol	GH36	GH	Mucoromycota	Mucoromycetes	alpha-galactosidase	Starch	3.2.1.22	Pathotroph	1.18257	6	0.315789	19	22
Podzol	GH43	GH	Ascomycota	Dothideomycetes	xylanase	Hemicellulose	3.2.1.37	Pathotroph	0.983471	38	0.844444	45	16
Podzol	GH43	GH	Ascomycota	Eurotiomycetes	arabinofuranosidase	Hemicellulose	3.2.1.55	Pathotroph	1.22338	16	0.390244	41	43
Podzol	GH43	GH	Ascomycota	Eurotiomycetes	arabinofuranosidase	Hemicellulose	3.2.1.55	Symbiotroph	1.22338	16	0.390244	41	43
Podzol	GH43	GH	Ascomycota	Eurotiomycetes	xylanase	Hemicellulose	3.2.1.37	Pathotroph	0.983471	20	0.909091	22	13
Podzol	GH43	GH	Ascomycota	Eurotiomycetes	xylanase	Hemicellulose	3.2.1.37	Saprotroph	0.983471	20	0.909091	22	13
Podzol	GH43	GH	Ascomycota	Eurotiomycetes	xylanase	Hemicellulose	3.2.1.37	Symbiotroph	0.983471	20	0.909091	22	13
Podzol	GH45	GH	Ascomycota	Eurotiomycetes	endo-glucanase	Cellulose	3.2.1.4	Pathotroph	1.11215	40	0.645161	62	14
Podzol	GH45	GH	Ascomycota	Eurotiomycetes	endo-glucanase	Cellulose	3.2.1.4	Symbiotroph	1.11215	40	0.645161	62	14
Podzol	GH45	GH	Ascomycota	Sordariomycetes	endo-glucanase	Cellulose	3.2.1.4	Pathotroph	1.11215	63	0.477273	132	38
Podzol	GH45	GH	Ascomycota	Sordariomycetes	endo-glucanase	Cellulose	3.2.1.4	Symbiotroph	1.11215	63	0.477273	132	38
Podzol	GH45	GH	Chytridiomycota	Chytridiomycetes	endo-glucanase	Cellulose	3.2.1.4	Saprotroph	1.11215	2	0.666667	3	4
Podzol	GH45	GH	Mucoromycota	Mucoromycetes	endo-glucanase	Cellulose	3.2.1.4	Pathotroph	1.11215	9	0.642857	14	16
Podzol	GH47	GH	Ascomycota	Sordariomycetes	alpha-mannosidase	Starch	3.2.1.113	Pathotroph	0.583333	1	0.5	2	4
Podzol	GH47	GH	Ascomycota	Sordariomycetes	alpha-mannosidase	Starch	3.2.1.113	Symbiotroph	0.583333	1	0.5	2	4
Podzol	GH5	GH	Ascomycota	Dothideomycetes	exo-glucanase	Cellulose	3.2.1.58	Pathotroph	1.0525	25	0.378788	66	84
Podzol	GH5	GH	Ascomycota	Eurotiomycetes	endo-glucanase	Cellulose	3.2.1.4	Pathotroph	1.61538	40	0.645161	62	14
Podzol	GH5	GH	Ascomycota	Eurotiomycetes	endo-glucanase	Cellulose	3.2.1.4	Saprotroph	2.08772	40	0.645161	62	14
Podzol	GH5	GH	Ascomycota	Eurotiomycetes	endo-glucanase	Cellulose	3.2.1.4	Symbiotroph	1.61538	40	0.645161	62	14
Podzol	GH5	GH	Ascomycota	Eurotiomycetes	endo-glucanase	Cellulose	3.2.1.75	Pathotroph	0.0780543	40	0.645161	62	5
Podzol	GH5	GH	Ascomycota	Eurotiomycetes	endo-glucanase	Cellulose	3.2.1.75	Saprotroph	0.100877	40	0.645161	62	5
Podzol	GH5	GH	Ascomycota	Eurotiomycetes	endo-mannanase	Hemicellulose	3.2.1.78	Pathotroph	0.892655	6	1	6	8
Podzol	GH5	GH	Ascomycota	Eurotiomycetes	endo-mannanase	Hemicellulose	3.2.1.78	Saprotroph	0.892655	6	1	6	8
Podzol	GH5	GH	Ascomycota	Eurotiomycetes	endo-mannanase	Hemicellulose	3.2.1.78	Symbiotroph	0.892655	6	1	6	8
Podzol	GH5	GH	Ascomycota	Eurotiomycetes	exo-glucanase	Cellulose	3.2.1.58	Pathotroph	1.0525	35	0.546875	64	62
Podzol	GH5	GH	Ascomycota	Eurotiomycetes	exo-glucanase	Cellulose	3.2.1.58	Saprotroph	1.0525	35	0.546875	64	62
Podzol	GH5	GH	Ascomycota	Sordariomycetes	endo-glucanase	Cellulose	3.2.1.4	Pathotroph	1.61538	63	0.477273	132	38
Podzol	GH5	GH	Ascomycota	Sordariomycetes	endo-glucanase	Cellulose	3.2.1.4	Symbiotroph	1.61538	63	0.477273	132	38
Podzol	GH5	GH	Ascomycota	Sordariomycetes	endo-glucanase	Cellulose	3.2.1.75	Pathotroph	0.0780543	63	0.477273	132	11
Podzol	GH5	GH	Ascomycota	Sordariomycetes	endo-glucanase	Cellulose	3.2.1.75	Symbiotroph	0.0780543	63	0.477273	132	11
Podzol	GH5	GH	Ascomycota	Sordariomycetes	endo-mannanase	Hemicellulose	3.2.1.78	Pathotroph	0.892655	23	1	23	34
Podzol	GH5	GH	Ascomycota	Sordariomycetes	endo-mannanase	Hemicellulose	3.2.1.78	Symbiotroph	0.892655	23	1	23	34
Podzol	GH5	GH	Basidiomycota	Agaricomycetes	endo-glucanase	Cellulose	3.2.1.4	Symbiotroph	1.11215	29	0.74359	39	55
Podzol	GH5	GH	Basidiomycota	Agaricomycetes	endo-mannanase	Hemicellulose	3.2.1.78	Saprotroph	0.892655	26	0.866667	30	35
Podzol	GH5	GH	Basidiomycota	Tremellomycetes	endo-glucanase	Cellulose	3.2.1.4	Pathotroph	1.11215	6	1	6	8
Podzol	GH51	GH	Ascomycota	Eurotiomycetes	arabinofuranosidase	Hemicellulose	3.2.1.55	Pathotroph	1.22338	16	0.390244	41	43
Podzol	GH51	GH	Ascomycota	Eurotiomycetes	arabinofuranosidase	Hemicellulose	3.2.1.55	Saprotroph	1.22338	16	0.390244	41	43
Podzol	GH51	GH	Ascomycota	Eurotiomycetes	arabinofuranosidase	Hemicellulose	3.2.1.55	Symbiotroph	1.22338	16	0.390244	41	43
Podzol	GH53	GH	Ascomycota	Eurotiomycetes	endo-galactanase	Hemicellulose	3.2.1.89	Pathotroph	1.1625	6	1	6	6
Podzol	GH53	GH	Ascomycota	Eurotiomycetes	endo-galactanase	Hemicellulose	3.2.1.89	Saprotroph	1.1625	6	1	6	6
Podzol	GH53	GH	Ascomycota	Eurotiomycetes	endo-galactanase	Hemicellulose	3.2.1.89	Symbiotroph	1.1625	6	1	6	6
Podzol	GH54	GH	Ascomycota	Eurotiomycetes	arabinofuranosidase	Hemicellulose	3.2.1.55	Pathotroph	1.22338	16	0.390244	41	43
Podzol	GH54	GH	Ascomycota	Eurotiomycetes	arabinofuranosidase	Hemicellulose	3.2.1.55	Saprotroph	1.22338	16	0.390244	41	43
Podzol	GH54	GH	Ascomycota	Eurotiomycetes	arabinofuranosidase	Hemicellulose	3.2.1.55	Symbiotroph	1.22338	16	0.390244	41	43
Podzol	GH54	GH	Ascomycota	Sordariomycetes	arabinofuranosidase	Hemicellulose	3.2.1.55	Pathotroph	1.22338	48	0.827586	58	63
Podzol	GH54	GH	Ascomycota	Sordariomycetes	arabinofuranosidase	Hemicellulose	3.2.1.55	Symbiotroph	1.22338	48	0.827586	58	63
Podzol	GH54	GH	Ascomycota	Sordariomycetes	xylanase	Hemicellulose	3.2.1.37	Pathotroph	0.983471	77	0.865169	89	32
Podzol	GH54	GH	Ascomycota	Sordariomycetes	xylanase	Hemicellulose	3.2.1.37	Symbiotroph	0.983471	77	0.865169	89	32
Podzol	GH55	GH	Ascomycota	Dothideomycetes	exo-glucanase	Cellulose	3.2.1.58	Pathotroph	1.0525	25	0.378788	66	84
Podzol	GH55	GH	Ascomycota	Eurotiomycetes	exo-glucanase	Cellulose	3.2.1.58	Pathotroph	1.0525	35	0.546875	64	62
Podzol	GH55	GH	Ascomycota	Eurotiomycetes	exo-glucanase	Cellulose	3.2.1.58	Saprotroph	1.0525	35	0.546875	64	62
Podzol	GH55	GH	Ascomycota	Eurotiomycetes	exo-glucanase	Cellulose	3.2.1.58	Symbiotroph	1.0525	35	0.546875	64	62
Podzol	GH55	GH	Ascomycota	Sordariomycetes	endo-glucanase	Cellulose	3.2.1.39	Pathotroph	0.988304	63	0.477273	132	106
Podzol	GH55	GH	Ascomycota	Sordariomycetes	endo-glucanase	Cellulose	3.2.1.39	Symbiotroph	0.988304	63	0.477273	132	106
Podzol	GH55	GH	Ascomycota	Sordariomycetes	exo-glucanase	Cellulose	3.2.1.58	Pathotroph	1.0525	18	0.3	60	68
Podzol	GH55	GH	Ascomycota	Sordariomycetes	exo-glucanase	Cellulose	3.2.1.58	Symbiotroph	1.0525	18	0.3	60	68
Podzol	GH6	GH	Ascomycota	Dothideomycetes	cellobiohydrolase	Cellulose	3.2.1.91	Pathotroph	1.58824	0	0	1	1
Podzol	GH6	GH	Ascomycota	Sordariomycetes	cellobiohydrolase	Cellulose	3.2.1.91	Pathotroph	1.58824	0	0	1	4
Podzol	GH6	GH	Ascomycota	Sordariomycetes	cellobiohydrolase	Cellulose	3.2.1.91	Symbiotroph	1.58824	0	0	1	4
Podzol	GH6	GH	Basidiomycota	Agaricomycetes	cellobiohydrolase	Cellulose	3.2.1.91	Saprotroph	1.58824	3	0.6	5	9
Podzol	GH62	GH	Ascomycota	Eurotiomycetes	arabinofuranosidase	Hemicellulose	3.2.1.55	Pathotroph	1.22338	16	0.390244	41	43
Podzol	GH62	GH	Ascomycota	Eurotiomycetes	arabinofuranosidase	Hemicellulose	3.2.1.55	Saprotroph	1.22338	16	0.390244	41	43
Podzol	GH62	GH	Ascomycota	Eurotiomycetes	arabinofuranosidase	Hemicellulose	3.2.1.55	Symbiotroph	1.22338	16	0.390244	41	43
Podzol	GH62	GH	Ascomycota	Sordariomycetes	arabinofuranosidase	Hemicellulose	3.2.1.55	Pathotroph	1.22338	48	0.827586	58	63
Podzol	GH62	GH	Ascomycota	Sordariomycetes	arabinofuranosidase	Hemicellulose	3.2.1.55	Symbiotroph	1.22338	48	0.827586	58	63
Podzol	GH62	GH	Basidiomycota	Agaricomycetes	arabinofuranosidase	Hemicellulose	3.2.1.55	Saprotroph	1.22338	24	0.631579	38	48
Podzol	GH7	GH	Ascomycota	Eurotiomycetes	endo-glucanase	Cellulose	3.2.1.4	Pathotroph	1.11215	40	0.645161	62	14
Podzol	GH7	GH	Ascomycota	Eurotiomycetes	endo-glucanase	Cellulose	3.2.1.4	Saprotroph	1.11215	40	0.645161	62	14
Podzol	GH7	GH	Ascomycota	Eurotiomycetes	endo-glucanase	Cellulose	3.2.1.4	Symbiotroph	1.11215	40	0.645161	62	14
Podzol	GH7	GH	Ascomycota	Sordariomycetes	endo-glucanase	Cellulose	3.2.1.4	Pathotroph	1.11215	63	0.477273	132	38
Podzol	GH7	GH	Ascomycota	Sordariomycetes	endo-glucanase	Cellulose	3.2.1.4	Symbiotroph	1.11215	63	0.477273	132	38
Podzol	GH71	GH	Ascomycota	Eurotiomycetes	endo-glucanase	Cellulose	3.2.1.59	Pathotroph	1	40	0.645161	62	2
Podzol	GH71	GH	Ascomycota	Eurotiomycetes	endo-glucanase	Cellulose	3.2.1.59	Saprotroph	1	40	0.645161	62	2
Podzol	GH74	GH	Ascomycota	Eurotiomycetes	endo-glucanase	Cellulose	3.2.1.151	Pathotroph	2	40	0.645161	62	3
Podzol	GH74	GH	Ascomycota	Eurotiomycetes	endo-glucanase	Cellulose	3.2.1.151	Saprotroph	2	40	0.645161	62	3
Podzol	GH81	GH	Ascomycota	Eurotiomycetes	endo-glucanase	Cellulose	3.2.1.39	Pathotroph	0.988304	40	0.645161	62	40
Podzol	GH81	GH	Ascomycota	Eurotiomycetes	endo-glucanase	Cellulose	3.2.1.39	Saprotroph	0.988304	40	0.645161	62	40
