# Supplementary material
Source: Research Square preprint supplement (doi:10.21203/rs.3.rs-9052155/v1)
Supplement: Supplementary file 7 [file 7fea06ba3ad7c62c6d55eaaf.xlsx]

## Sheet: S4a-e
Supplementary Table S4a
Metadata comprising of fold-change of ITS2 gene copies for fungal phyla quantified for treatment cover crop variations (Legume/Grass and Brassica/Grass) against Fallow for the samples from different sampling sites, depth and moisture conditions
Taxon_id	Condition_A	Condition_B	log2_median_ratio	median_diff	mean_diff	wilcox_p_value	regex_match
ab	Rainfall_fed	Drought	-9.64327e-17	2.22045e-16	1.11022e-16	0.331772	k__Fungi
ac	Rainfall_fed	Drought	0.0138385	-0.00186766	-0.0047483	0.741935	p__Basidiomycota
ad	Rainfall_fed	Drought	-0.0384407	0.0036773	0.00143096	0.649909	p__Fungi_phy_Incertae_sedis
ae	Rainfall_fed	Drought	0.0339679	-0.0310645	-0.0142974	0.397844	p__Ascomycota
af	Rainfall_fed	Drought	-0.13592	0.0109488	0.0101039	0.0492005	p__Mucoromycota
ag	Rainfall_fed	Drought	0.254487	-0.00344818	-0.00306174	0.515853	p__Cryptomycota
ah	Rainfall_fed	Drought	-0.0614554	0.000408134	0.00232381	0.433427	p__Chytridiomycota
ai	Rainfall_fed	Drought	0.130213	-0.00152405	-0.00137931	0.320629	p__Zoopagomycota
aj	Rainfall_fed	Drought	0.0443459	-0.00011983	-0.000259206	0.837503	p__Aphelidiomycota
ak	Rainfall_fed	Drought	0	0	-1.82314e-05	0.34153	p__Olpidiomycota
al	Rainfall_fed	Drought	0	0	1.11675e-05	0.781565	p__Blastocladiomycota
am	Rainfall_fed	Drought	0	0	7.89033e-05	0.324587	p__Entorrhizomycota
an	Rainfall_fed	Drought	0.0463669	-0.00052336	-0.00182756	0.354654	c__Agaricomycetes
ao	Rainfall_fed	Drought	-0.0384407	0.0036773	0.00149042	0.64033	c__Fungi
ap	Rainfall_fed	Drought	0.0524536	-0.0244535	-0.00882534	0.562937	c__Sordariomycetes
aq	Rainfall_fed	Drought	0.110405	-0.00263539	-0.00459376	0.510163	c__Saccharomycetes
ar	Rainfall_fed	Drought	-0.00557713	0.000642593	0.00310565	0.823929	c__Leotiomycetes
as	Rainfall_fed	Drought	0.0266472	-0.00177731	-0.000573751	0.918481	c__Tremellomycetes
at	Rainfall_fed	Drought	0.00556272	-0.000242106	0.000621815	0.501626	c__Dothideomycetes
au	Rainfall_fed	Drought	-0.0374864	0.00228159	0.00405545	0.418009	c__Mortierellomycetes
av	Rainfall_fed	Drought	0.254487	-0.00344818	-0.00306704	0.501582	c__Rozellomycetes
aw	Rainfall_fed	Drought	0.152375	-0.000186385	0.00290194	0.655616	c__Mucoromycetes
ax	Rainfall_fed	Drought	0.192971	-0.0139982	-0.0144288	0.0334163	c__Eurotiomycetes
ay	Rainfall_fed	Drought	0.0591117	-9.22115e-05	-0.000158685	0.340698	c__Rhizophydiomycetes
az	Rainfall_fed	Drought	-0.531303	0.000775458	0.000923706	0.474456	c__Malasseziomycetes
ba	Rainfall_fed	Drought	0.0303754	-0.000851648	-0.000802508	0.523092	c__Ascomycota_Incertae_sedis
bb	Rainfall_fed	Drought	-0.0560168	0.000126035	-0.00139684	0.959152	c__Basidiomycota_Incertae_sedis
bc	Rainfall_fed	Drought	0.230524	-0.000325916	-0.000142732	0.591657	c__Spizellomycetes
bd	Rainfall_fed	Drought	0	0	-4.35095e-05	0.0498734	c__Lobulomycetes
be	Rainfall_fed	Drought	0.207334	-0.000833734	-0.000493371	0.649082	c__Zoopagomycetes
bf	Rainfall_fed	Drought	0.398965	-0.000790853	-0.00029136	0.20766	c__Glomeromycetes
bg	Rainfall_fed	Drought	0	0	9.5324e-05	0.771857	c__Agaricostilbomycetes
bh	Rainfall_fed	Drought	-0.190342	4.95489e-05	0.00050735	0.890377	c__Paraglomeromycetes
bi	Rainfall_fed	Drought	0	0	9.0619e-06	0.926496	c__Ustilaginomycetes
bj	Rainfall_fed	Drought	-0.156258	7.0925e-05	0.0022329	0.532787	c__Chytridiomycetes
bk	Rainfall_fed	Drought	-0.218304	9.35422e-05	0.00146796	0.201286	c__Laboulbeniomycetes
bl	Rainfall_fed	Drought	0.0443459	-0.00011983	-0.000259206	0.837503	c__Aphelidiomycetes
bm	Rainfall_fed	Drought	0.157946	-0.000206459	-0.000217602	0.597498	c__Basidiobolomycetes
bn	Rainfall_fed	Drought	0	0	0.00292279	0.866038	c__Archaeorhizomycetes
bo	Rainfall_fed	Drought	-0.162779	0.00230338	-0.00167691	0.375872	c__Microbotryomycetes
bp	Rainfall_fed	Drought	0	0	2.32704e-05	0.793319	c__Monoblepharidomycetes
bq	Rainfall_fed	Drought	0.0877177	-0.000803919	0.0016718	0.94134	c__Pezizomycetes
br	Rainfall_fed	Drought	0.332269	-0.000156444	9.73556e-05	0.525731	c__Lecanoromycetes
bs	Rainfall_fed	Drought	0	0	0.000586064	0.699218	c__Endogonomycetes
bt	Rainfall_fed	Drought	-0.0325162	1.03422e-05	-7.40274e-05	0.822086	c__Orbiliomycetes
bu	Rainfall_fed	Drought	0	0	0.000305659	0.992147	c__Archaeosporomycetes
bv	Rainfall_fed	Drought	0.310294	-0.000276443	-4.01051e-05	0.462384	c__Cystobasidiomycetes
bw	Rainfall_fed	Drought	0.768788	-0.000431634	-0.000529507	0.0587962	c__Atractiellomycetes
bx	Rainfall_fed	Drought	-1.01171	0.000229794	0.000406824	0.428954	c__Rhizophlyctidomycetes
by	Rainfall_fed	Drought	0	0	-1.82314e-05	0.34153	c__Olpidiomycetes
bz	Rainfall_fed	Drought	0	0	-6.00853e-05	0.053946	c__GS27
ca	Rainfall_fed	Drought	0	0	3.85835e-05	0.919417	c__Kickxellomycetes
cb	Rainfall_fed	Drought	0	0	7.51041e-05	0.116318	c__Exobasidiomycetes
cc	Rainfall_fed	Drought	0	-9.7251e-05	-0.000691413	0.653703	c__Ramicandelaberomycetes
cd	Rainfall_fed	Drought	0	0	1.4014e-06	0.345108	c__Physodermatomycetes
ce	Rainfall_fed	Drought	0	0	0.000921125	0.400374	c__Calcarisporiellomycetes
cf	Rainfall_fed	Drought	0	0	0.000163873	0.235602	c__Sareomycetes
cg	Rainfall_fed	Drought	0	0	7.11619e-05	0.0236252	c__GS25
ch	Rainfall_fed	Drought	0	0	1.92461e-06	0.324587	c__Schizosaccharomycetes
ci	Rainfall_fed	Drought	0	0	-9.18184e-06	0.461203	c__Neocallimastigomycetes
cj	Rainfall_fed	Drought	0	0	7.14761e-06	0.4055	c__Cladochytriomycetes
ck	Rainfall_fed	Drought	0	0	0.00111202	0.762486	c__Umbelopsidomycetes
cl	Rainfall_fed	Drought	0	0	-6.31671e-07	0.324587	c__GS14
cm	Rainfall_fed	Drought	0	0	8.5302e-08	0.57845	c__GS37
cn	Rainfall_fed	Drought	0	0	1.02337e-05	0.374523	c__Pucciniomycetes
co	Rainfall_fed	Drought	0	0	-2.98705e-05	0.886567	c__Taphrinomycetes
cp	Rainfall_fed	Drought	0	0	-4.29411e-07	0.324587	c__Harpellomycetes
cq	Rainfall_fed	Drought	0	0	-2.52131e-05	0.319137	c__Wallemiomycetes
cr	Rainfall_fed	Drought	0	0	-5.94627e-05	0.324587	c__GS01
cs	Rainfall_fed	Drought	0	0	-1.9004e-05	0.300054	c__Classiculomycetes
ct	Rainfall_fed	Drought	0	0	-1.49391e-06	0.158857	c__Dacrymycetes
cu	Rainfall_fed	Drought	0	0	9.76609e-06	0.158857	c__Blastocladiomycetes
cv	Rainfall_fed	Drought	0	0	7.89033e-05	0.324587	c__Entorrhizomycetes
Supplementary Table S4b
Metadata comprising of fold-change of ITS2 gene copies for fungal phyla quantified for treatment cover crop variations (Legume/Grass and Brassica/Grass) against Fallow for the samples from different sampling sites, depth and moisture conditions
Variation	Site	Condition	Depth	Phylum	Relative_abundance	fold_change
Brassica/Grass	Luvisol	Drought	Subsoil	Aphelidiomycota	0.298255	0.706054
Brassica/Grass	Luvisol	Rainfall_fed	Subsoil	Aphelidiomycota	0.386049	0.487601
Brassica/Grass	Luvisol	Drought	Subsoil	Ascomycota	63.3784	-0.0397879
Brassica/Grass	Luvisol	Rainfall_fed	Subsoil	Ascomycota	44.3866	-0.50705
Brassica/Grass	Luvisol	Drought	Subsoil	Basidiomycota	8.95189	0.243758
Brassica/Grass	Luvisol	Rainfall_fed	Subsoil	Basidiomycota	16.3451	0.767622
Brassica/Grass	Luvisol	Drought	Subsoil	Blastocladiomycota	0	0
Brassica/Grass	Luvisol	Rainfall_fed	Subsoil	Blastocladiomycota	0.00130203	-2.95081
Brassica/Grass	Luvisol	Drought	Subsoil	Chytridiomycota	0.28046	-0.342199
Brassica/Grass	Luvisol	Rainfall_fed	Subsoil	Chytridiomycota	0.367742	-0.902852
Brassica/Grass	Luvisol	Drought	Subsoil	Cryptomycota	1.06269	0.194165
Brassica/Grass	Luvisol	Rainfall_fed	Subsoil	Cryptomycota	0.923932	0.597219
Brassica/Grass	Luvisol	Drought	Subsoil	Entorrhizomycota	0	0
Brassica/Grass	Luvisol	Rainfall_fed	Subsoil	Entorrhizomycota	0	0
Brassica/Grass	Luvisol	Drought	Subsoil	Fungi_phy_Incertae_sedis	7.04717	-0.0732875
Brassica/Grass	Luvisol	Rainfall_fed	Subsoil	Fungi_phy_Incertae_sedis	11.1706	0.683229
Brassica/Grass	Luvisol	Drought	Subsoil	Mucoromycota	6.71473	0.34247
Brassica/Grass	Luvisol	Rainfall_fed	Subsoil	Mucoromycota	8.6013	0.593604
Brassica/Grass	Luvisol	Drought	Subsoil	Olpidiomycota	0.01258	3.63849
Brassica/Grass	Luvisol	Rainfall_fed	Subsoil	Olpidiomycota	0	0
Brassica/Grass	Luvisol	Drought	Subsoil	Unclassified Fungi	9.88849	-0.215813
Brassica/Grass	Luvisol	Rainfall_fed	Subsoil	Unclassified Fungi	17.2529	0.53413
Brassica/Grass	Luvisol	Drought	Subsoil	Zoopagomycota	2.36537	0.54604
Brassica/Grass	Luvisol	Rainfall_fed	Subsoil	Zoopagomycota	0.564443	-1.04322
Brassica/Grass	Luvisol	Drought	Topsoil	Aphelidiomycota	0.0765237	-1.25652
Brassica/Grass	Luvisol	Rainfall_fed	Topsoil	Aphelidiomycota	0.219198	-0.328949
Brassica/Grass	Luvisol	Drought	Topsoil	Ascomycota	70.7684	0.119328
Brassica/Grass	Luvisol	Rainfall_fed	Topsoil	Ascomycota	69.0025	0.129473
Brassica/Grass	Luvisol	Drought	Topsoil	Basidiomycota	10.2122	0.433782
Brassica/Grass	Luvisol	Rainfall_fed	Topsoil	Basidiomycota	7.94295	-0.273487
Brassica/Grass	Luvisol	Drought	Topsoil	Blastocladiomycota	0	0
Brassica/Grass	Luvisol	Rainfall_fed	Topsoil	Blastocladiomycota	0.00102485	-3.29616
Brassica/Grass	Luvisol	Drought	Topsoil	Chytridiomycota	0.447075	0.330521
Brassica/Grass	Luvisol	Rainfall_fed	Topsoil	Chytridiomycota	0.676292	-0.0238996
Brassica/Grass	Luvisol	Drought	Topsoil	Cryptomycota	1.2274	0.402048
Brassica/Grass	Luvisol	Rainfall_fed	Topsoil	Cryptomycota	2.043	1.74205
Brassica/Grass	Luvisol	Drought	Topsoil	Entorrhizomycota	0	0
Brassica/Grass	Luvisol	Rainfall_fed	Topsoil	Entorrhizomycota	0	0
Brassica/Grass	Luvisol	Drought	Topsoil	Fungi_phy_Incertae_sedis	3.94528	-0.910203
Brassica/Grass	Luvisol	Rainfall_fed	Topsoil	Fungi_phy_Incertae_sedis	6.35123	-0.131376
Brassica/Grass	Luvisol	Drought	Topsoil	Mucoromycota	5.51882	0.0594998
Brassica/Grass	Luvisol	Rainfall_fed	Topsoil	Mucoromycota	5.57266	-0.0325838
Brassica/Grass	Luvisol	Drought	Topsoil	Olpidiomycota	0.002279	1.17383
Brassica/Grass	Luvisol	Rainfall_fed	Topsoil	Olpidiomycota	0.00339355	1.25025
Brassica/Grass	Luvisol	Drought	Topsoil	Unclassified Fungi	7.39731	-0.634562
Brassica/Grass	Luvisol	Rainfall_fed	Topsoil	Unclassified Fungi	7.32233	-0.702334
Brassica/Grass	Luvisol	Drought	Topsoil	Zoopagomycota	0.404714	-2.00105
Brassica/Grass	Luvisol	Rainfall_fed	Topsoil	Zoopagomycota	0.865444	-0.426601
Legume/Grass	Luvisol	Drought	Subsoil	Aphelidiomycota	0.43612	1.25423
Legume/Grass	Luvisol	Rainfall_fed	Subsoil	Aphelidiomycota	0.198343	-0.473188
Legume/Grass	Luvisol	Drought	Subsoil	Ascomycota	56.9333	-0.194505
Legume/Grass	Luvisol	Rainfall_fed	Subsoil	Ascomycota	45.4487	-0.472937
Legume/Grass	Luvisol	Drought	Subsoil	Basidiomycota	9.99011	0.402066
Legume/Grass	Luvisol	Rainfall_fed	Subsoil	Basidiomycota	7.28455	-0.398322
Legume/Grass	Luvisol	Drought	Subsoil	Blastocladiomycota	0	0
Legume/Grass	Luvisol	Rainfall_fed	Subsoil	Blastocladiomycota	0	0
Legume/Grass	Luvisol	Drought	Subsoil	Chytridiomycota	0.195042	-0.866209
Legume/Grass	Luvisol	Rainfall_fed	Subsoil	Chytridiomycota	0.0849568	-3.01675
Legume/Grass	Luvisol	Drought	Subsoil	Cryptomycota	0.810372	-0.196905
Legume/Grass	Luvisol	Rainfall_fed	Subsoil	Cryptomycota	0.387841	-0.655104
Legume/Grass	Luvisol	Drought	Subsoil	Entorrhizomycota	0	0
Legume/Grass	Luvisol	Rainfall_fed	Subsoil	Entorrhizomycota	0	0
Legume/Grass	Luvisol	Drought	Subsoil	Fungi_phy_Incertae_sedis	8.69777	0.230313
Legume/Grass	Luvisol	Rainfall_fed	Subsoil	Fungi_phy_Incertae_sedis	9.20479	0.403975
Legume/Grass	Luvisol	Drought	Subsoil	Mucoromycota	6.41961	0.277625
Legume/Grass	Luvisol	Rainfall_fed	Subsoil	Mucoromycota	8.85911	0.636211
Legume/Grass	Luvisol	Drought	Subsoil	Olpidiomycota	0	0
Legume/Grass	Luvisol	Rainfall_fed	Subsoil	Olpidiomycota	0	0
Legume/Grass	Luvisol	Drought	Subsoil	Unclassified Fungi	15.2776	0.411785
Legume/Grass	Luvisol	Rainfall_fed	Subsoil	Unclassified Fungi	28.156	1.24073
Legume/Grass	Luvisol	Drought	Subsoil	Zoopagomycota	1.24002	-0.385657
Legume/Grass	Luvisol	Rainfall_fed	Subsoil	Zoopagomycota	0.375768	-1.6302
Legume/Grass	Luvisol	Drought	Topsoil	Aphelidiomycota	0.11181	-0.70944
Legume/Grass	Luvisol	Rainfall_fed	Topsoil	Aphelidiomycota	0.142292	-0.952334
Legume/Grass	Luvisol	Drought	Topsoil	Ascomycota	59.3005	-0.135734
Legume/Grass	Luvisol	Rainfall_fed	Topsoil	Ascomycota	65.7937	0.0607753
Legume/Grass	Luvisol	Drought	Topsoil	Basidiomycota	5.03448	-0.586591
Legume/Grass	Luvisol	Rainfall_fed	Topsoil	Basidiomycota	7.48935	-0.358321
Legume/Grass	Luvisol	Drought	Topsoil	Blastocladiomycota	0	0
Legume/Grass	Luvisol	Rainfall_fed	Topsoil	Blastocladiomycota	0.00195939	-2.36118
Legume/Grass	Luvisol	Drought	Topsoil	Chytridiomycota	3.02443	3.08859
Legume/Grass	Luvisol	Rainfall_fed	Topsoil	Chytridiomycota	1.02791	0.580093
Legume/Grass	Luvisol	Drought	Topsoil	Cryptomycota	1.21076	0.382353
Legume/Grass	Luvisol	Rainfall_fed	Topsoil	Cryptomycota	1.54931	1.34299
Legume/Grass	Luvisol	Drought	Topsoil	Entorrhizomycota	0	0
Legume/Grass	Luvisol	Rainfall_fed	Topsoil	Entorrhizomycota	0	0
Legume/Grass	Luvisol	Drought	Topsoil	Fungi_phy_Incertae_sedis	7.67041	0.0489719
Legume/Grass	Luvisol	Rainfall_fed	Topsoil	Fungi_phy_Incertae_sedis	5.6524	-0.299546
Legume/Grass	Luvisol	Drought	Topsoil	Mucoromycota	5.59713	0.0798265
Legume/Grass	Luvisol	Rainfall_fed	Topsoil	Mucoromycota	6.58872	0.209047
Legume/Grass	Luvisol	Drought	Topsoil	Olpidiomycota	0.062435	5.94971
Legume/Grass	Luvisol	Rainfall_fed	Topsoil	Olpidiomycota	0.0016865	0.241487
Legume/Grass	Luvisol	Drought	Topsoil	Unclassified Fungi	17.5041	0.608061
Legume/Grass	Luvisol	Rainfall_fed	Topsoil	Unclassified Fungi	10.8916	-0.129489
Legume/Grass	Luvisol	Drought	Topsoil	Zoopagomycota	0.483919	-1.74319
Legume/Grass	Luvisol	Rainfall_fed	Topsoil	Zoopagomycota	0.860999	-0.434032
Brassica/Grass	Phaeozem	Drought	Subsoil	Aphelidiomycota	0.449644	2.13831
Brassica/Grass	Phaeozem	Rainfall_fed	Subsoil	Aphelidiomycota	0.0643477	-1.24198
Brassica/Grass	Phaeozem	Drought	Subsoil	Ascomycota	53.4575	-0.33316
Brassica/Grass	Phaeozem	Rainfall_fed	Subsoil	Ascomycota	52.9205	-0.239617
Brassica/Grass	Phaeozem	Drought	Subsoil	Basidiomycota	10.2697	0.886399
Brassica/Grass	Phaeozem	Rainfall_fed	Subsoil	Basidiomycota	10.1409	0.125895
Brassica/Grass	Phaeozem	Drought	Subsoil	Blastocladiomycota	0	0
Brassica/Grass	Phaeozem	Rainfall_fed	Subsoil	Blastocladiomycota	0.0321555	5.06948
Brassica/Grass	Phaeozem	Drought	Subsoil	Chytridiomycota	0.422063	-0.751677
Brassica/Grass	Phaeozem	Rainfall_fed	Subsoil	Chytridiomycota	0.484717	0.682664
Brassica/Grass	Phaeozem	Drought	Subsoil	Cryptomycota	1.80743	0.706527
Brassica/Grass	Phaeozem	Rainfall_fed	Subsoil	Cryptomycota	0.672929	-0.811111
Brassica/Grass	Phaeozem	Drought	Subsoil	Entorrhizomycota	0	0
Brassica/Grass	Phaeozem	Rainfall_fed	Subsoil	Entorrhizomycota	0	0
Brassica/Grass	Phaeozem	Drought	Subsoil	Fungi_phy_Incertae_sedis	13.8581	1.38076
Brassica/Grass	Phaeozem	Rainfall_fed	Subsoil	Fungi_phy_Incertae_sedis	8.40711	0.216888
Brassica/Grass	Phaeozem	Drought	Subsoil	Mucoromycota	4.5044	0.351939
Brassica/Grass	Phaeozem	Rainfall_fed	Subsoil	Mucoromycota	5.20108	-0.288643
Brassica/Grass	Phaeozem	Drought	Subsoil	Olpidiomycota	0	0
Brassica/Grass	Phaeozem	Rainfall_fed	Subsoil	Olpidiomycota	0	0
Brassica/Grass	Phaeozem	Drought	Subsoil	Unclassified Fungi	14.4951	-0.0885231
Brassica/Grass	Phaeozem	Rainfall_fed	Subsoil	Unclassified Fungi	21.3728	0.928257
Brassica/Grass	Phaeozem	Drought	Subsoil	Zoopagomycota	0.736011	-0.315296
Brassica/Grass	Phaeozem	Rainfall_fed	Subsoil	Zoopagomycota	0.70353	-1.32985
Brassica/Grass	Phaeozem	Drought	Topsoil	Aphelidiomycota	0.123858	0.278218
Brassica/Grass	Phaeozem	Rainfall_fed	Topsoil	Aphelidiomycota	0.0887284	-0.778476
Brassica/Grass	Phaeozem	Drought	Topsoil	Ascomycota	73.8078	0.132221
Brassica/Grass	Phaeozem	Rainfall_fed	Topsoil	Ascomycota	79.4746	0.347052
Brassica/Grass	Phaeozem	Drought	Topsoil	Basidiomycota	6.30308	0.182131
Brassica/Grass	Phaeozem	Rainfall_fed	Topsoil	Basidiomycota	5.31269	-0.80678
Brassica/Grass	Phaeozem	Drought	Topsoil	Blastocladiomycota	0.00154239	0
Brassica/Grass	Phaeozem	Rainfall_fed	Topsoil	Blastocladiomycota	0	0
Brassica/Grass	Phaeozem	Drought	Topsoil	Chytridiomycota	0.5041	-0.495427
Brassica/Grass	Phaeozem	Rainfall_fed	Topsoil	Chytridiomycota	0.458581	0.602699
Brassica/Grass	Phaeozem	Drought	Topsoil	Cryptomycota	0.325343	-1.76738
Brassica/Grass	Phaeozem	Rainfall_fed	Topsoil	Cryptomycota	0.571964	-1.04564
Brassica/Grass	Phaeozem	Drought	Topsoil	Entorrhizomycota	0	0
Brassica/Grass	Phaeozem	Rainfall_fed	Topsoil	Entorrhizomycota	0	0
Brassica/Grass	Phaeozem	Drought	Topsoil	Fungi_phy_Incertae_sedis	4.91903	-0.113531
Brassica/Grass	Phaeozem	Rainfall_fed	Topsoil	Fungi_phy_Incertae_sedis	4.0462	-0.838153
Brassica/Grass	Phaeozem	Drought	Topsoil	Mucoromycota	4.30014	0.28499
Brassica/Grass	Phaeozem	Rainfall_fed	Topsoil	Mucoromycota	2.93894	-1.11216
Brassica/Grass	Phaeozem	Drought	Topsoil	Olpidiomycota	0.0081771	3.51559
Brassica/Grass	Phaeozem	Rainfall_fed	Topsoil	Olpidiomycota	0.00100608	-1.07528
Brassica/Grass	Phaeozem	Drought	Topsoil	Unclassified Fungi	7.40527	-1.05746
Brassica/Grass	Phaeozem	Rainfall_fed	Topsoil	Unclassified Fungi	5.56887	-1.01206
Brassica/Grass	Phaeozem	Drought	Topsoil	Zoopagomycota	2.30165	1.32957
Brassica/Grass	Phaeozem	Rainfall_fed	Topsoil	Zoopagomycota	1.53838	-0.20113
Legume/Grass	Phaeozem	Drought	Subsoil	Aphelidiomycota	0.140025	0.455207
Legume/Grass	Phaeozem	Rainfall_fed	Subsoil	Aphelidiomycota	0.0702481	-1.11541
Legume/Grass	Phaeozem	Drought	Subsoil	Ascomycota	42.444	-0.665992
Legume/Grass	Phaeozem	Rainfall_fed	Subsoil	Ascomycota	30.5563	-1.03197
Legume/Grass	Phaeozem	Drought	Subsoil	Basidiomycota	16.6982	1.58769
Legume/Grass	Phaeozem	Rainfall_fed	Subsoil	Basidiomycota	11.8466	0.350181
Legume/Grass	Phaeozem	Drought	Subsoil	Blastocladiomycota	0	0
Legume/Grass	Phaeozem	Rainfall_fed	Subsoil	Blastocladiomycota	0.000992906	0.0522174
Legume/Grass	Phaeozem	Drought	Subsoil	Chytridiomycota	0.119463	-2.57257
Legume/Grass	Phaeozem	Rainfall_fed	Subsoil	Chytridiomycota	1.23791	2.03536
Legume/Grass	Phaeozem	Drought	Subsoil	Cryptomycota	0.507911	-1.12477
Legume/Grass	Phaeozem	Rainfall_fed	Subsoil	Cryptomycota	0.254231	-2.21542
Legume/Grass	Phaeozem	Drought	Subsoil	Entorrhizomycota	0	0
Legume/Grass	Phaeozem	Rainfall_fed	Subsoil	Entorrhizomycota	0	0
Legume/Grass	Phaeozem	Drought	Subsoil	Fungi_phy_Incertae_sedis	12.4998	1.23193
Legume/Grass	Phaeozem	Rainfall_fed	Subsoil	Fungi_phy_Incertae_sedis	8.87294	0.294691
Legume/Grass	Phaeozem	Drought	Subsoil	Mucoromycota	5.65052	0.678989
Legume/Grass	Phaeozem	Rainfall_fed	Subsoil	Mucoromycota	6.64299	0.0643781
Legume/Grass	Phaeozem	Drought	Subsoil	Olpidiomycota	0	0
Legume/Grass	Phaeozem	Rainfall_fed	Subsoil	Olpidiomycota	0	0
Legume/Grass	Phaeozem	Drought	Subsoil	Unclassified Fungi	21.6197	0.488258
Legume/Grass	Phaeozem	Rainfall_fed	Subsoil	Unclassified Fungi	40.1748	1.83877
Legume/Grass	Phaeozem	Drought	Subsoil	Zoopagomycota	0.320425	-1.51504
Legume/Grass	Phaeozem	Rainfall_fed	Subsoil	Zoopagomycota	0.343011	-2.36621
Legume/Grass	Phaeozem	Drought	Topsoil	Aphelidiomycota	0.108595	0.0884792
Legume/Grass	Phaeozem	Rainfall_fed	Topsoil	Aphelidiomycota	0.335546	1.14057
Legume/Grass	Phaeozem	Drought	Topsoil	Ascomycota	75.4417	0.163809
Legume/Grass	Phaeozem	Rainfall_fed	Topsoil	Ascomycota	77.1821	0.304823
Legume/Grass	Phaeozem	Drought	Topsoil	Basidiomycota	5.05285	-0.13683
Legume/Grass	Phaeozem	Rainfall_fed	Topsoil	Basidiomycota	4.82643	-0.945266
Legume/Grass	Phaeozem	Drought	Topsoil	Blastocladiomycota	0	0
Legume/Grass	Phaeozem	Rainfall_fed	Topsoil	Blastocladiomycota	0.00134854	0.493892
Legume/Grass	Phaeozem	Drought	Topsoil	Chytridiomycota	0.333792	-1.09018
Legume/Grass	Phaeozem	Rainfall_fed	Topsoil	Chytridiomycota	0.449794	0.574787
Legume/Grass	Phaeozem	Drought	Topsoil	Cryptomycota	0.90374	-0.293436
Legume/Grass	Phaeozem	Rainfall_fed	Topsoil	Cryptomycota	1.42154	0.26782
Legume/Grass	Phaeozem	Drought	Topsoil	Entorrhizomycota	0	0
Legume/Grass	Phaeozem	Rainfall_fed	Topsoil	Entorrhizomycota	0	0
Legume/Grass	Phaeozem	Drought	Topsoil	Fungi_phy_Incertae_sedis	4.40361	-0.273217
Legume/Grass	Phaeozem	Rainfall_fed	Topsoil	Fungi_phy_Incertae_sedis	4.4829	-0.690287
Legume/Grass	Phaeozem	Drought	Topsoil	Mucoromycota	4.44909	0.334117
Legume/Grass	Phaeozem	Rainfall_fed	Topsoil	Mucoromycota	3.20555	-0.986881
Legume/Grass	Phaeozem	Drought	Topsoil	Olpidiomycota	0.00574328	3.00587
Legume/Grass	Phaeozem	Rainfall_fed	Topsoil	Olpidiomycota	0.00772182	1.86492
Legume/Grass	Phaeozem	Drought	Topsoil	Unclassified Fungi	8.07002	-0.933441
Legume/Grass	Phaeozem	Rainfall_fed	Topsoil	Unclassified Fungi	6.38935	-0.813775
Legume/Grass	Phaeozem	Drought	Topsoil	Zoopagomycota	1.23087	0.426578
Legume/Grass	Phaeozem	Rainfall_fed	Topsoil	Zoopagomycota	1.69774	-0.0589215
Brassica/Grass	Podzol	Drought	Subsoil	Aphelidiomycota	0.147016	-1.1921
Brassica/Grass	Podzol	Rainfall_fed	Subsoil	Aphelidiomycota	0.275192	-0.545227
Brassica/Grass	Podzol	Drought	Subsoil	Ascomycota	47.3877	-0.0302711
Brassica/Grass	Podzol	Rainfall_fed	Subsoil	Ascomycota	50.6013	0.0325278
Brassica/Grass	Podzol	Drought	Subsoil	Basidiomycota	16.5257	0.738826
Brassica/Grass	Podzol	Rainfall_fed	Subsoil	Basidiomycota	17.0656	0.968614
Brassica/Grass	Podzol	Drought	Subsoil	Blastocladiomycota	0.000753091	-0.700629
Brassica/Grass	Podzol	Rainfall_fed	Subsoil	Blastocladiomycota	0	0
Brassica/Grass	Podzol	Drought	Subsoil	Chytridiomycota	0.299517	-1.06357
Brassica/Grass	Podzol	Rainfall_fed	Subsoil	Chytridiomycota	0.518691	-1.8792
Brassica/Grass	Podzol	Drought	Subsoil	Cryptomycota	3.05711	-0.0922625
Brassica/Grass	Podzol	Rainfall_fed	Subsoil	Cryptomycota	1.12511	-1.16845
Brassica/Grass	Podzol	Drought	Subsoil	Entorrhizomycota	0	0
Brassica/Grass	Podzol	Rainfall_fed	Subsoil	Entorrhizomycota	0	0
Brassica/Grass	Podzol	Drought	Subsoil	Fungi_phy_Incertae_sedis	5.03733	0.0834874
Brassica/Grass	Podzol	Rainfall_fed	Subsoil	Fungi_phy_Incertae_sedis	2.54812	-1.62003
Brassica/Grass	Podzol	Drought	Subsoil	Mucoromycota	3.49197	-0.526392
Brassica/Grass	Podzol	Rainfall_fed	Subsoil	Mucoromycota	5.93509	0.0741682
Brassica/Grass	Podzol	Drought	Subsoil	Olpidiomycota	0	0
Brassica/Grass	Podzol	Rainfall_fed	Subsoil	Olpidiomycota	0	0
Brassica/Grass	Podzol	Drought	Subsoil	Unclassified Fungi	23.9637	-0.199729
Brassica/Grass	Podzol	Rainfall_fed	Subsoil	Unclassified Fungi	21.9129	-0.0922073
Brassica/Grass	Podzol	Drought	Subsoil	Zoopagomycota	0.0892605	-0.989374
Brassica/Grass	Podzol	Rainfall_fed	Subsoil	Zoopagomycota	0.0179997	-2.92266
Brassica/Grass	Podzol	Drought	Topsoil	Aphelidiomycota	0.487222	0.536515
Brassica/Grass	Podzol	Rainfall_fed	Topsoil	Aphelidiomycota	0.302021	-0.411018
Brassica/Grass	Podzol	Drought	Topsoil	Ascomycota	55.9813	0.210162
Brassica/Grass	Podzol	Rainfall_fed	Topsoil	Ascomycota	50.1584	0.019844
Brassica/Grass	Podzol	Drought	Topsoil	Basidiomycota	8.38859	-0.239387
Brassica/Grass	Podzol	Rainfall_fed	Topsoil	Basidiomycota	8.49793	-0.0372924
Brassica/Grass	Podzol	Drought	Topsoil	Blastocladiomycota	0	0
Brassica/Grass	Podzol	Rainfall_fed	Topsoil	Blastocladiomycota	0	0
Brassica/Grass	Podzol	Drought	Topsoil	Chytridiomycota	1.05531	0.753392
Brassica/Grass	Podzol	Rainfall_fed	Topsoil	Chytridiomycota	2.62172	0.45837
Brassica/Grass	Podzol	Drought	Topsoil	Cryptomycota	4.0163	0.301437
Brassica/Grass	Podzol	Rainfall_fed	Topsoil	Cryptomycota	2.87859	0.186844
Brassica/Grass	Podzol	Drought	Topsoil	Entorrhizomycota	0	0
Brassica/Grass	Podzol	Rainfall_fed	Topsoil	Entorrhizomycota	0	0
Brassica/Grass	Podzol	Drought	Topsoil	Fungi_phy_Incertae_sedis	5.96182	0.32658
Brassica/Grass	Podzol	Rainfall_fed	Topsoil	Fungi_phy_Incertae_sedis	7.81362	-0.00347304
Brassica/Grass	Podzol	Drought	Topsoil	Mucoromycota	4.76432	-0.0781614
Brassica/Grass	Podzol	Rainfall_fed	Topsoil	Mucoromycota	6.96973	0.306002
Brassica/Grass	Podzol	Drought	Topsoil	Olpidiomycota	0	0
Brassica/Grass	Podzol	Rainfall_fed	Topsoil	Olpidiomycota	0.0205084	4.15287
Brassica/Grass	Podzol	Drought	Topsoil	Unclassified Fungi	19.2044	-0.519138
Brassica/Grass	Podzol	Rainfall_fed	Topsoil	Unclassified Fungi	20.533	-0.186045
Brassica/Grass	Podzol	Drought	Topsoil	Zoopagomycota	0.140708	-0.332762
Brassica/Grass	Podzol	Rainfall_fed	Topsoil	Zoopagomycota	0.20451	0.583475
Legume/Grass	Podzol	Drought	Subsoil	Aphelidiomycota	0.394148	0.230671
Legume/Grass	Podzol	Rainfall_fed	Subsoil	Aphelidiomycota	0.370537	-0.116046
Legume/Grass	Podzol	Drought	Subsoil	Ascomycota	47.9639	-0.0128334
Legume/Grass	Podzol	Rainfall_fed	Subsoil	Ascomycota	43.7579	-0.177102
Legume/Grass	Podzol	Drought	Subsoil	Basidiomycota	13.3072	0.426325
Legume/Grass	Podzol	Rainfall_fed	Subsoil	Basidiomycota	12.2591	0.491377
Legume/Grass	Podzol	Drought	Subsoil	Blastocladiomycota	0	0
Legume/Grass	Podzol	Rainfall_fed	Subsoil	Blastocladiomycota	0	0
Legume/Grass	Podzol	Drought	Subsoil	Chytridiomycota	0.180297	-1.79583
Legume/Grass	Podzol	Rainfall_fed	Subsoil	Chytridiomycota	0.310611	-2.61896
Legume/Grass	Podzol	Drought	Subsoil	Cryptomycota	2.35344	-0.469657
Legume/Grass	Podzol	Rainfall_fed	Subsoil	Cryptomycota	2.32086	-0.123857
Legume/Grass	Podzol	Drought	Subsoil	Entorrhizomycota	0	0
Legume/Grass	Podzol	Rainfall_fed	Subsoil	Entorrhizomycota	0.176161	0
Legume/Grass	Podzol	Drought	Subsoil	Fungi_phy_Incertae_sedis	4.67969	-0.0227613
Legume/Grass	Podzol	Rainfall_fed	Subsoil	Fungi_phy_Incertae_sedis	4.93871	-0.665329
Legume/Grass	Podzol	Drought	Subsoil	Mucoromycota	7.73457	0.620888
Legume/Grass	Podzol	Rainfall_fed	Subsoil	Mucoromycota	12.2368	1.11805
Legume/Grass	Podzol	Drought	Subsoil	Olpidiomycota	0	0
Legume/Grass	Podzol	Rainfall_fed	Subsoil	Olpidiomycota	0	0
Legume/Grass	Podzol	Drought	Subsoil	Unclassified Fungi	23.1171	-0.25162
Legume/Grass	Podzol	Rainfall_fed	Subsoil	Unclassified Fungi	23.4977	0.00853209
Legume/Grass	Podzol	Drought	Subsoil	Zoopagomycota	0.269658	0.605663
Legume/Grass	Podzol	Rainfall_fed	Subsoil	Zoopagomycota	0.131616	-0.0523646
Legume/Grass	Podzol	Drought	Topsoil	Aphelidiomycota	0.783064	1.22107
Legume/Grass	Podzol	Rainfall_fed	Topsoil	Aphelidiomycota	0.909317	1.17912
Legume/Grass	Podzol	Drought	Topsoil	Ascomycota	62.6479	0.372483
Legume/Grass	Podzol	Rainfall_fed	Topsoil	Ascomycota	62.9257	0.347001
Legume/Grass	Podzol	Drought	Topsoil	Basidiomycota	10.3061	0.0576134
Legume/Grass	Podzol	Rainfall_fed	Topsoil	Basidiomycota	11.0209	0.337768
Legume/Grass	Podzol	Drought	Topsoil	Blastocladiomycota	0	0
Legume/Grass	Podzol	Rainfall_fed	Topsoil	Blastocladiomycota	0	0
Legume/Grass	Podzol	Drought	Topsoil	Chytridiomycota	1.15983	0.889631
Legume/Grass	Podzol	Rainfall_fed	Topsoil	Chytridiomycota	0.736191	-1.37399
Legume/Grass	Podzol	Drought	Topsoil	Cryptomycota	3.57871	0.135011
Legume/Grass	Podzol	Rainfall_fed	Topsoil	Cryptomycota	3.33376	0.39863
Legume/Grass	Podzol	Drought	Topsoil	Entorrhizomycota	0	0
Legume/Grass	Podzol	Rainfall_fed	Topsoil	Entorrhizomycota	0	0
Legume/Grass	Podzol	Drought	Topsoil	Fungi_phy_Incertae_sedis	5.74051	0.272005
Legume/Grass	Podzol	Rainfall_fed	Topsoil	Fungi_phy_Incertae_sedis	5.75596	-0.444406
Legume/Grass	Podzol	Drought	Topsoil	Mucoromycota	4.32282	-0.218459
Legume/Grass	Podzol	Rainfall_fed	Topsoil	Mucoromycota	4.12232	-0.451645
Legume/Grass	Podzol	Drought	Topsoil	Olpidiomycota	0.00105809	0
Legume/Grass	Podzol	Rainfall_fed	Topsoil	Olpidiomycota	0	0
Legume/Grass	Podzol	Drought	Topsoil	Unclassified Fungi	10.4717	-1.39409
Legume/Grass	Podzol	Rainfall_fed	Topsoil	Unclassified Fungi	10.7887	-1.11447
Legume/Grass	Podzol	Drought	Topsoil	Zoopagomycota	0.988381	2.4796
Legume/Grass	Podzol	Rainfall_fed	Topsoil	Zoopagomycota	0.407211	1.57708
Supplementary Table S4c
Summary of Compact Letter Display (CLD) after MANOVA on the total abundance of ITS2 gene copies for cover crop variations, the soil types and the sampling depths
Confidence intervals: *p < 0.05, **p < 0.01, ***p < 0.001, ****p < 0.0001
Total number of samples, n = 106.
Soil_type	Variation	Depth	emmean	CLD
Luvisol	Legume/Grass	Topsoil	1.5857e+07	abcd
Luvisol	Fallow	Topsoil	1.38396e+07	abcd
Luvisol	Brassica/Grass	Topsoil	7.77259e+06	bcd
Luvisol	Brassica/Grass	Subsoil	4.245e+06	cd
Luvisol	Fallow	Subsoil	2.08258e+06	cd
Luvisol	Legume/Grass	Subsoil	1.28011e+06	cd
Phaeozem	Brassica/Grass	Topsoil	3.42807e+07	a
Phaeozem	Legume/Grass	Topsoil	2.97836e+07	ab
Phaeozem	Fallow	Topsoil	2.1831e+07	abc
Phaeozem	Brassica/Grass	Subsoil	401693	d
Phaeozem	Legume/Grass	Subsoil	170105	cd
Phaeozem	Fallow	Subsoil	161893	d
Podzol	Legume/Grass	Topsoil	7.16338e+06	bcd
Podzol	Fallow	Topsoil	6.81717e+06	bcd
Podzol	Brassica/Grass	Topsoil	6.72214e+06	bcd
Podzol	Fallow	Subsoil	2.31052e+06	cd
Podzol	Brassica/Grass	Subsoil	410192	d
Podzol	Legume/Grass	Subsoil	179546	d
Supplementary Table S4d
Metadata comprising of total abundance of ITS2 gene copies for each fungal phyla quantified for the samples from different sampling sites, depth and moisture conditions and cover crop variation conditions
Variation	Soil_type	Condition	Depth	Phylum	Absolute_ITS2_gene_copies_per_g_soil
Brassica/Grass	Luvisol	Drought	Subsoil	Aphelidiomycota	3868.96
Fallow	Luvisol	Drought	Subsoil	Aphelidiomycota	2828.39
Legume/Grass	Luvisol	Drought	Subsoil	Aphelidiomycota	9640.82
Brassica/Grass	Phaeozem	Drought	Subsoil	Aphelidiomycota	3886.6
Fallow	Phaeozem	Drought	Subsoil	Aphelidiomycota	637.115
Legume/Grass	Phaeozem	Drought	Subsoil	Aphelidiomycota	194.121
Brassica/Grass	Podzol	Drought	Subsoil	Aphelidiomycota	1031.27
Fallow	Podzol	Drought	Subsoil	Aphelidiomycota	3525.74
Legume/Grass	Podzol	Drought	Subsoil	Aphelidiomycota	1130.03
Brassica/Grass	Luvisol	Rainfall-fed	Subsoil	Aphelidiomycota	96831.8
Fallow	Luvisol	Rainfall-fed	Subsoil	Aphelidiomycota	19406.3
Legume/Grass	Luvisol	Rainfall-fed	Subsoil	Aphelidiomycota	6684.12
Brassica/Grass	Phaeozem	Rainfall-fed	Subsoil	Aphelidiomycota	73.6375
Fallow	Phaeozem	Rainfall-fed	Subsoil	Aphelidiomycota	39.3325
Legume/Grass	Phaeozem	Rainfall-fed	Subsoil	Aphelidiomycota	33.541
Brassica/Grass	Podzol	Rainfall-fed	Subsoil	Aphelidiomycota	94.7198
Fallow	Podzol	Rainfall-fed	Subsoil	Aphelidiomycota	3971.53
Legume/Grass	Podzol	Rainfall-fed	Subsoil	Aphelidiomycota	843.489
Brassica/Grass	Luvisol	Drought	Topsoil	Aphelidiomycota	8419
Fallow	Luvisol	Drought	Topsoil	Aphelidiomycota	17534.1
Legume/Grass	Luvisol	Drought	Topsoil	Aphelidiomycota	9299.68
Brassica/Grass	Phaeozem	Drought	Topsoil	Aphelidiomycota	38030.7
Fallow	Phaeozem	Drought	Topsoil	Aphelidiomycota	13614.4
Legume/Grass	Phaeozem	Drought	Topsoil	Aphelidiomycota	16009.3
Brassica/Grass	Podzol	Drought	Topsoil	Aphelidiomycota	110550
Fallow	Podzol	Drought	Topsoil	Aphelidiomycota	13184.7
Legume/Grass	Podzol	Drought	Topsoil	Aphelidiomycota	65341
Brassica/Grass	Luvisol	Rainfall-fed	Topsoil	Aphelidiomycota	7494.37
Fallow	Luvisol	Rainfall-fed	Topsoil	Aphelidiomycota	15859.2
Legume/Grass	Luvisol	Rainfall-fed	Topsoil	Aphelidiomycota	38145.1
Brassica/Grass	Phaeozem	Rainfall-fed	Topsoil	Aphelidiomycota	36402.4
Fallow	Phaeozem	Rainfall-fed	Topsoil	Aphelidiomycota	35911.9
Legume/Grass	Phaeozem	Rainfall-fed	Topsoil	Aphelidiomycota	72721.7
Brassica/Grass	Podzol	Rainfall-fed	Topsoil	Aphelidiomycota	1586.75
Fallow	Podzol	Rainfall-fed	Topsoil	Aphelidiomycota	51914.2
Legume/Grass	Podzol	Rainfall-fed	Topsoil	Aphelidiomycota	72125
Brassica/Grass	Luvisol	Drought	Subsoil	Ascomycota	1.31224e+06
Fallow	Luvisol	Drought	Subsoil	Ascomycota	539442
Legume/Grass	Luvisol	Drought	Subsoil	Ascomycota	741336
Brassica/Grass	Phaeozem	Drought	Subsoil	Ascomycota	312886
Fallow	Phaeozem	Drought	Subsoil	Ascomycota	241253
Legume/Grass	Phaeozem	Drought	Subsoil	Ascomycota	104823
Brassica/Grass	Podzol	Drought	Subsoil	Ascomycota	670032
Fallow	Podzol	Drought	Subsoil	Ascomycota	1.37531e+06
Legume/Grass	Podzol	Drought	Subsoil	Ascomycota	118044
Brassica/Grass	Luvisol	Rainfall-fed	Subsoil	Ascomycota	6.71071e+06
Fallow	Luvisol	Rainfall-fed	Subsoil	Ascomycota	2.36605e+06
Legume/Grass	Luvisol	Rainfall-fed	Subsoil	Ascomycota	738022
Brassica/Grass	Phaeozem	Rainfall-fed	Subsoil	Ascomycota	64576.7
Fallow	Phaeozem	Rainfall-fed	Subsoil	Ascomycota	13393.8
Legume/Grass	Phaeozem	Rainfall-fed	Subsoil	Ascomycota	9076.25
Brassica/Grass	Podzol	Rainfall-fed	Subsoil	Ascomycota	111363
Fallow	Podzol	Rainfall-fed	Subsoil	Ascomycota	1.36868e+06
Legume/Grass	Podzol	Rainfall-fed	Subsoil	Ascomycota	101399
Brassica/Grass	Luvisol	Drought	Topsoil	Ascomycota	8.94113e+06
Fallow	Luvisol	Drought	Topsoil	Ascomycota	1.00619e+07
Legume/Grass	Luvisol	Drought	Topsoil	Ascomycota	3.47018e+06
Brassica/Grass	Phaeozem	Drought	Topsoil	Ascomycota	2.3644e+07
Fallow	Phaeozem	Drought	Topsoil	Ascomycota	9.11407e+06
Legume/Grass	Phaeozem	Drought	Topsoil	Ascomycota	1.27541e+07
Brassica/Grass	Podzol	Drought	Topsoil	Ascomycota	8.42534e+06
Fallow	Podzol	Drought	Topsoil	Ascomycota	1.6797e+06
Legume/Grass	Podzol	Drought	Topsoil	Ascomycota	4.09633e+06
Brassica/Grass	Luvisol	Rainfall-fed	Topsoil	Ascomycota	2.14874e+06
Fallow	Luvisol	Rainfall-fed	Topsoil	Ascomycota	6.58801e+06
Legume/Grass	Luvisol	Rainfall-fed	Topsoil	Ascomycota	1.82914e+07
Brassica/Grass	Phaeozem	Rainfall-fed	Topsoil	Ascomycota	2.93495e+07
Fallow	Phaeozem	Rainfall-fed	Topsoil	Ascomycota	2.69213e+07
Legume/Grass	Phaeozem	Rainfall-fed	Topsoil	Ascomycota	3.26663e+07
Brassica/Grass	Podzol	Rainfall-fed	Topsoil	Ascomycota	291459
Fallow	Podzol	Rainfall-fed	Topsoil	Ascomycota	6.47401e+06
Legume/Grass	Podzol	Rainfall-fed	Topsoil	Ascomycota	4.84242e+06
Brassica/Grass	Luvisol	Drought	Subsoil	Basidiomycota	158725
Fallow	Luvisol	Drought	Subsoil	Basidiomycota	79471.6
Legume/Grass	Luvisol	Drought	Subsoil	Basidiomycota	96723.7
Brassica/Grass	Phaeozem	Drought	Subsoil	Basidiomycota	58612
Fallow	Phaeozem	Drought	Subsoil	Basidiomycota	29368.1
Legume/Grass	Phaeozem	Drought	Subsoil	Basidiomycota	47250.7
Brassica/Grass	Podzol	Drought	Subsoil	Basidiomycota	115921
Fallow	Podzol	Drought	Subsoil	Basidiomycota	405351
Legume/Grass	Podzol	Drought	Subsoil	Basidiomycota	29544
Brassica/Grass	Luvisol	Rainfall-fed	Subsoil	Basidiomycota	2.2931e+06
Fallow	Luvisol	Rainfall-fed	Subsoil	Basidiomycota	404703
Legume/Grass	Luvisol	Rainfall-fed	Subsoil	Basidiomycota	193650
Brassica/Grass	Phaeozem	Rainfall-fed	Subsoil	Basidiomycota	11908.4
Fallow	Phaeozem	Rainfall-fed	Subsoil	Basidiomycota	3707.91
Legume/Grass	Phaeozem	Rainfall-fed	Subsoil	Basidiomycota	2946.13
Brassica/Grass	Podzol	Rainfall-fed	Subsoil	Basidiomycota	48181.3
Fallow	Podzol	Rainfall-fed	Subsoil	Basidiomycota	300118
Legume/Grass	Podzol	Rainfall-fed	Subsoil	Basidiomycota	24532.2
Brassica/Grass	Luvisol	Drought	Topsoil	Basidiomycota	1.1282e+06
Fallow	Luvisol	Drought	Topsoil	Basidiomycota	950064
Legume/Grass	Luvisol	Drought	Topsoil	Basidiomycota	276611
Brassica/Grass	Phaeozem	Drought	Topsoil	Basidiomycota	1.9311e+06
Fallow	Phaeozem	Drought	Topsoil	Basidiomycota	595397
Legume/Grass	Phaeozem	Drought	Topsoil	Basidiomycota	654799
Brassica/Grass	Podzol	Drought	Topsoil	Basidiomycota	1.30282e+06
Fallow	Podzol	Drought	Topsoil	Basidiomycota	317693
Legume/Grass	Podzol	Drought	Topsoil	Basidiomycota	679708
Brassica/Grass	Luvisol	Rainfall-fed	Topsoil	Basidiomycota	250998
Fallow	Luvisol	Rainfall-fed	Topsoil	Basidiomycota	646646
Legume/Grass	Luvisol	Rainfall-fed	Topsoil	Basidiomycota	2.00997e+06
Brassica/Grass	Phaeozem	Rainfall-fed	Topsoil	Basidiomycota	1.88065e+06
Fallow	Phaeozem	Rainfall-fed	Topsoil	Basidiomycota	1.68884e+06
Legume/Grass	Phaeozem	Rainfall-fed	Topsoil	Basidiomycota	1.80348e+06
Brassica/Grass	Podzol	Rainfall-fed	Topsoil	Basidiomycota	50126.5
Fallow	Podzol	Rainfall-fed	Topsoil	Basidiomycota	945411
Legume/Grass	Podzol	Rainfall-fed	Topsoil	Basidiomycota	846341
Brassica/Grass	Luvisol	Drought	Subsoil	Blastocladiomycota	0
Fallow	Luvisol	Drought	Subsoil	Blastocladiomycota	119.044
Legume/Grass	Luvisol	Drought	Subsoil	Blastocladiomycota	0
Brassica/Grass	Phaeozem	Drought	Subsoil	Blastocladiomycota	0
Fallow	Phaeozem	Drought	Subsoil	Blastocladiomycota	0
Legume/Grass	Phaeozem	Drought	Subsoil	Blastocladiomycota	0
Brassica/Grass	Podzol	Drought	Subsoil	Blastocladiomycota	0.752886
Fallow	Podzol	Drought	Subsoil	Blastocladiomycota	0
Legume/Grass	Podzol	Drought	Subsoil	Blastocladiomycota	0
Brassica/Grass	Luvisol	Rainfall-fed	Subsoil	Blastocladiomycota	64.8478
Fallow	Luvisol	Rainfall-fed	Subsoil	Blastocladiomycota	28.4665
Legume/Grass	Luvisol	Rainfall-fed	Subsoil	Blastocladiomycota	0
Brassica/Grass	Phaeozem	Rainfall-fed	Subsoil	Blastocladiomycota	30.499
Fallow	Phaeozem	Rainfall-fed	Subsoil	Blastocladiomycota	0
Legume/Grass	Phaeozem	Rainfall-fed	Subsoil	Blastocladiomycota	0.474078
Brassica/Grass	Podzol	Rainfall-fed	Subsoil	Blastocladiomycota	0
Fallow	Podzol	Rainfall-fed	Subsoil	Blastocladiomycota	33.4588
Legume/Grass	Podzol	Rainfall-fed	Subsoil	Blastocladiomycota	0
Brassica/Grass	Luvisol	Drought	Topsoil	Blastocladiomycota	0
Fallow	Luvisol	Drought	Topsoil	Blastocladiomycota	189.584
Legume/Grass	Luvisol	Drought	Topsoil	Blastocladiomycota	0
Brassica/Grass	Phaeozem	Drought	Topsoil	Blastocladiomycota	418.735
Fallow	Phaeozem	Drought	Topsoil	Blastocladiomycota	0
Legume/Grass	Phaeozem	Drought	Topsoil	Blastocladiomycota	0
Brassica/Grass	Podzol	Drought	Topsoil	Blastocladiomycota	0
Fallow	Podzol	Drought	Topsoil	Blastocladiomycota	95.0767
Legume/Grass	Podzol	Drought	Topsoil	Blastocladiomycota	0
Brassica/Grass	Luvisol	Rainfall-fed	Topsoil	Blastocladiomycota	44.3895
Fallow	Luvisol	Rainfall-fed	Topsoil	Blastocladiomycota	0
Legume/Grass	Luvisol	Rainfall-fed	Topsoil	Blastocladiomycota	82.5267
Brassica/Grass	Phaeozem	Rainfall-fed	Topsoil	Blastocladiomycota	0
Fallow	Phaeozem	Rainfall-fed	Topsoil	Blastocladiomycota	99.9065
Legume/Grass	Phaeozem	Rainfall-fed	Topsoil	Blastocladiomycota	144.014
Brassica/Grass	Podzol	Rainfall-fed	Topsoil	Blastocladiomycota	0
Fallow	Podzol	Rainfall-fed	Topsoil	Blastocladiomycota	0
Legume/Grass	Podzol	Rainfall-fed	Topsoil	Blastocladiomycota	0
Brassica/Grass	Luvisol	Drought	Subsoil	Chytridiomycota	2956.6
Fallow	Luvisol	Drought	Subsoil	Chytridiomycota	1129.03
Legume/Grass	Luvisol	Drought	Subsoil	Chytridiomycota	3389.76
Brassica/Grass	Phaeozem	Drought	Subsoil	Chytridiomycota	3810.2
Fallow	Phaeozem	Drought	Subsoil	Chytridiomycota	1181.21
Legume/Grass	Phaeozem	Drought	Subsoil	Chytridiomycota	210.692
Brassica/Grass	Podzol	Drought	Subsoil	Chytridiomycota	3345.8
Fallow	Podzol	Drought	Subsoil	Chytridiomycota	7081.86
Legume/Grass	Podzol	Drought	Subsoil	Chytridiomycota	633.035
Brassica/Grass	Luvisol	Rainfall-fed	Subsoil	Chytridiomycota	38293.7
Fallow	Luvisol	Rainfall-fed	Subsoil	Chytridiomycota	14173.4
Legume/Grass	Luvisol	Rainfall-fed	Subsoil	Chytridiomycota	421.663
Brassica/Grass	Phaeozem	Rainfall-fed	Subsoil	Chytridiomycota	453.045
Fallow	Phaeozem	Rainfall-fed	Subsoil	Chytridiomycota	30.875
Legume/Grass	Phaeozem	Rainfall-fed	Subsoil	Chytridiomycota	590.72
Brassica/Grass	Podzol	Rainfall-fed	Subsoil	Chytridiomycota	853.035
Fallow	Podzol	Rainfall-fed	Subsoil	Chytridiomycota	62088.7
Legume/Grass	Podzol	Rainfall-fed	Subsoil	Chytridiomycota	818.995
Brassica/Grass	Luvisol	Drought	Topsoil	Chytridiomycota	76233.8
Fallow	Luvisol	Drought	Topsoil	Chytridiomycota	113404
Legume/Grass	Luvisol	Drought	Topsoil	Chytridiomycota	98331.7
Brassica/Grass	Phaeozem	Drought	Topsoil	Chytridiomycota	144716
Fallow	Phaeozem	Drought	Topsoil	Chytridiomycota	111620
Legume/Grass	Phaeozem	Drought	Topsoil	Chytridiomycota	35152.4
Brassica/Grass	Podzol	Drought	Topsoil	Chytridiomycota	60477.3
Fallow	Podzol	Drought	Topsoil	Chytridiomycota	22703.6
Legume/Grass	Podzol	Drought	Topsoil	Chytridiomycota	80076.2
Brassica/Grass	Luvisol	Rainfall-fed	Topsoil	Chytridiomycota	23450.3
Fallow	Luvisol	Rainfall-fed	Topsoil	Chytridiomycota	113167
Legume/Grass	Luvisol	Rainfall-fed	Topsoil	Chytridiomycota	130734
Brassica/Grass	Phaeozem	Rainfall-fed	Topsoil	Chytridiomycota	172454
Fallow	Phaeozem	Rainfall-fed	Topsoil	Chytridiomycota	129022
Legume/Grass	Phaeozem	Rainfall-fed	Topsoil	Chytridiomycota	155553
Brassica/Grass	Podzol	Rainfall-fed	Topsoil	Chytridiomycota	15727.4
Fallow	Podzol	Rainfall-fed	Topsoil	Chytridiomycota	93129.2
Legume/Grass	Podzol	Rainfall-fed	Topsoil	Chytridiomycota	69913.5
Brassica/Grass	Luvisol	Drought	Subsoil	Cryptomycota	28950.7
Fallow	Luvisol	Drought	Subsoil	Cryptomycota	2456.91
Legume/Grass	Luvisol	Drought	Subsoil	Cryptomycota	14698
Brassica/Grass	Phaeozem	Drought	Subsoil	Cryptomycota	15898.8
Fallow	Phaeozem	Drought	Subsoil	Cryptomycota	2251.42
Legume/Grass	Phaeozem	Drought	Subsoil	Cryptomycota	795.507
Brassica/Grass	Podzol	Drought	Subsoil	Cryptomycota	64826
Fallow	Podzol	Drought	Subsoil	Cryptomycota	34134.1
Legume/Grass	Podzol	Drought	Subsoil	Cryptomycota	5533.71
Brassica/Grass	Luvisol	Rainfall-fed	Subsoil	Cryptomycota	114898
Fallow	Luvisol	Rainfall-fed	Subsoil	Cryptomycota	8876.44
Legume/Grass	Luvisol	Rainfall-fed	Subsoil	Cryptomycota	11374
Brassica/Grass	Phaeozem	Rainfall-fed	Subsoil	Cryptomycota	588.827
Fallow	Phaeozem	Rainfall-fed	Subsoil	Cryptomycota	831.908
Legume/Grass	Phaeozem	Rainfall-fed	Subsoil	Cryptomycota	44.3297
Brassica/Grass	Podzol	Rainfall-fed	Subsoil	Cryptomycota	1200.97
Fallow	Podzol	Rainfall-fed	Subsoil	Cryptomycota	41618.4
Legume/Grass	Podzol	Rainfall-fed	Subsoil	Cryptomycota	5890.96
Brassica/Grass	Luvisol	Drought	Topsoil	Cryptomycota	116658
Fallow	Luvisol	Drought	Topsoil	Cryptomycota	166488
Legume/Grass	Luvisol	Drought	Topsoil	Cryptomycota	34681.7
Brassica/Grass	Phaeozem	Drought	Topsoil	Cryptomycota	123990
Fallow	Phaeozem	Drought	Topsoil	Cryptomycota	196489
Legume/Grass	Phaeozem	Drought	Topsoil	Cryptomycota	161924
Brassica/Grass	Podzol	Drought	Topsoil	Cryptomycota	385198
Fallow	Podzol	Drought	Topsoil	Cryptomycota	114917
Legume/Grass	Podzol	Drought	Topsoil	Cryptomycota	217137
Brassica/Grass	Luvisol	Rainfall-fed	Topsoil	Cryptomycota	62371.6
Fallow	Luvisol	Rainfall-fed	Topsoil	Cryptomycota	77234.4
Legume/Grass	Luvisol	Rainfall-fed	Topsoil	Cryptomycota	752950
Brassica/Grass	Phaeozem	Rainfall-fed	Topsoil	Cryptomycota	194049
Fallow	Phaeozem	Rainfall-fed	Topsoil	Cryptomycota	180842
Legume/Grass	Phaeozem	Rainfall-fed	Topsoil	Cryptomycota	1.35711e+06
Brassica/Grass	Podzol	Rainfall-fed	Topsoil	Cryptomycota	20604.3
Fallow	Podzol	Rainfall-fed	Topsoil	Cryptomycota	345306
Legume/Grass	Podzol	Rainfall-fed	Topsoil	Cryptomycota	188175
Brassica/Grass	Luvisol	Drought	Subsoil	Entorrhizomycota	0
Fallow	Luvisol	Drought	Subsoil	Entorrhizomycota	0
Legume/Grass	Luvisol	Drought	Subsoil	Entorrhizomycota	0
Brassica/Grass	Phaeozem	Drought	Subsoil	Entorrhizomycota	0
Fallow	Phaeozem	Drought	Subsoil	Entorrhizomycota	0
Legume/Grass	Phaeozem	Drought	Subsoil	Entorrhizomycota	0
Brassica/Grass	Podzol	Drought	Subsoil	Entorrhizomycota	0
Fallow	Podzol	Drought	Subsoil	Entorrhizomycota	0
Legume/Grass	Podzol	Drought	Subsoil	Entorrhizomycota	0
Brassica/Grass	Luvisol	Rainfall-fed	Subsoil	Entorrhizomycota	0
Fallow	Luvisol	Rainfall-fed	Subsoil	Entorrhizomycota	0
Legume/Grass	Luvisol	Rainfall-fed	Subsoil	Entorrhizomycota	0
Brassica/Grass	Phaeozem	Rainfall-fed	Subsoil	Entorrhizomycota	0
Fallow	Phaeozem	Rainfall-fed	Subsoil	Entorrhizomycota	0
Legume/Grass	Phaeozem	Rainfall-fed	Subsoil	Entorrhizomycota	0
Brassica/Grass	Podzol	Rainfall-fed	Subsoil	Entorrhizomycota	0
Fallow	Podzol	Rainfall-fed	Subsoil	Entorrhizomycota	0
Legume/Grass	Podzol	Rainfall-fed	Subsoil	Entorrhizomycota	187.247
Brassica/Grass	Luvisol	Drought	Topsoil	Entorrhizomycota	0
Fallow	Luvisol	Drought	Topsoil	Entorrhizomycota	0
Legume/Grass	Luvisol	Drought	Topsoil	Entorrhizomycota	0
Brassica/Grass	Phaeozem	Drought	Topsoil	Entorrhizomycota	0
Fallow	Phaeozem	Drought	Topsoil	Entorrhizomycota	0
Legume/Grass	Phaeozem	Drought	Topsoil	Entorrhizomycota	0
Brassica/Grass	Podzol	Drought	Topsoil	Entorrhizomycota	0
Fallow	Podzol	Drought	Topsoil	Entorrhizomycota	0
Legume/Grass	Podzol	Drought	Topsoil	Entorrhizomycota	0
Brassica/Grass	Luvisol	Rainfall-fed	Topsoil	Entorrhizomycota	0
Fallow	Luvisol	Rainfall-fed	Topsoil	Entorrhizomycota	0
Legume/Grass	Luvisol	Rainfall-fed	Topsoil	Entorrhizomycota	0
Brassica/Grass	Phaeozem	Rainfall-fed	Topsoil	Entorrhizomycota	0
Fallow	Phaeozem	Rainfall-fed	Topsoil	Entorrhizomycota	0
Legume/Grass	Phaeozem	Rainfall-fed	Topsoil	Entorrhizomycota	0
Brassica/Grass	Podzol	Rainfall-fed	Topsoil	Entorrhizomycota	0
Fallow	Podzol	Rainfall-fed	Topsoil	Entorrhizomycota	0
Legume/Grass	Podzol	Rainfall-fed	Topsoil	Entorrhizomycota	0
Brassica/Grass	Luvisol	Drought	Subsoil	Fungi_phy_Incertae_sedis	143873
Fallow	Luvisol	Drought	Subsoil	Fungi_phy_Incertae_sedis	92241.5
Legume/Grass	Luvisol	Drought	Subsoil	Fungi_phy_Incertae_sedis	109676
Brassica/Grass	Phaeozem	Drought	Subsoil	Fungi_phy_Incertae_sedis	86042.4
Fallow	Phaeozem	Drought	Subsoil	Fungi_phy_Incertae_sedis	21638.3
Legume/Grass	Phaeozem	Drought	Subsoil	Fungi_phy_Incertae_sedis	53043.8
Brassica/Grass	Podzol	Drought	Subsoil	Fungi_phy_Incertae_sedis	66842.2
Fallow	Podzol	Drought	Subsoil	Fungi_phy_Incertae_sedis	68591.4
Legume/Grass	Podzol	Drought	Subsoil	Fungi_phy_Incertae_sedis	10402.3
Brassica/Grass	Luvisol	Rainfall-fed	Subsoil	Fungi_phy_Incertae_sedis	2.21649e+06
Fallow	Luvisol	Rainfall-fed	Subsoil	Fungi_phy_Incertae_sedis	522948
Legume/Grass	Luvisol	Rainfall-fed	Subsoil	Fungi_phy_Incertae_sedis	100030
Brassica/Grass	Phaeozem	Rainfall-fed	Subsoil	Fungi_phy_Incertae_sedis	10865.6
Fallow	Phaeozem	Rainfall-fed	Subsoil	Fungi_phy_Incertae_sedis	2390.93
Legume/Grass	Phaeozem	Rainfall-fed	Subsoil	Fungi_phy_Incertae_sedis	2855.34
Brassica/Grass	Podzol	Rainfall-fed	Subsoil	Fungi_phy_Incertae_sedis	3474.17
Fallow	Podzol	Rainfall-fed	Subsoil	Fungi_phy_Incertae_sedis	216099
Legume/Grass	Podzol	Rainfall-fed	Subsoil	Fungi_phy_Incertae_sedis	11519.7
Brassica/Grass	Luvisol	Drought	Topsoil	Fungi_phy_Incertae_sedis	506822
Fallow	Luvisol	Drought	Topsoil	Fungi_phy_Incertae_sedis	737448
Legume/Grass	Luvisol	Drought	Topsoil	Fungi_phy_Incertae_sedis	261971
Brassica/Grass	Phaeozem	Drought	Topsoil	Fungi_phy_Incertae_sedis	1.5457e+06
Fallow	Phaeozem	Drought	Topsoil	Fungi_phy_Incertae_sedis	462688
Legume/Grass	Phaeozem	Drought	Topsoil	Fungi_phy_Incertae_sedis	631163
Brassica/Grass	Podzol	Drought	Topsoil	Fungi_phy_Incertae_sedis	531412
Fallow	Podzol	Drought	Topsoil	Fungi_phy_Incertae_sedis	164507
Legume/Grass	Podzol	Drought	Topsoil	Fungi_phy_Incertae_sedis	364451
Brassica/Grass	Luvisol	Rainfall-fed	Topsoil	Fungi_phy_Incertae_sedis	194568
Fallow	Luvisol	Rainfall-fed	Topsoil	Fungi_phy_Incertae_sedis	468838
Legume/Grass	Luvisol	Rainfall-fed	Topsoil	Fungi_phy_Incertae_sedis	1.64828e+06
Brassica/Grass	Phaeozem	Rainfall-fed	Topsoil	Fungi_phy_Incertae_sedis	1.48523e+06
Fallow	Phaeozem	Rainfall-fed	Topsoil	Fungi_phy_Incertae_sedis	1.42245e+06
Legume/Grass	Phaeozem	Rainfall-fed	Topsoil	Fungi_phy_Incertae_sedis	1.59044e+06
Brassica/Grass	Podzol	Rainfall-fed	Topsoil	Fungi_phy_Incertae_sedis	47730.8
Fallow	Podzol	Rainfall-fed	Topsoil	Fungi_phy_Incertae_sedis	775059
Legume/Grass	Podzol	Rainfall-fed	Topsoil	Fungi_phy_Incertae_sedis	439539
Brassica/Grass	Luvisol	Drought	Subsoil	Mucoromycota	122213
Fallow	Luvisol	Drought	Subsoil	Mucoromycota	50740.5
Legume/Grass	Luvisol	Drought	Subsoil	Mucoromycota	81729.7
Brassica/Grass	Phaeozem	Drought	Subsoil	Mucoromycota	21240.5
Fallow	Phaeozem	Drought	Subsoil	Mucoromycota	3743.58
Legume/Grass	Phaeozem	Drought	Subsoil	Mucoromycota	16688.8
Brassica/Grass	Podzol	Drought	Subsoil	Mucoromycota	52703.1
Fallow	Podzol	Drought	Subsoil	Mucoromycota	31707.7
Legume/Grass	Podzol	Drought	Subsoil	Mucoromycota	12045.8
Brassica/Grass	Luvisol	Rainfall-fed	Subsoil	Mucoromycota	1.18333e+06
Fallow	Luvisol	Rainfall-fed	Subsoil	Mucoromycota	297844
Legume/Grass	Luvisol	Rainfall-fed	Subsoil	Mucoromycota	197770
Brassica/Grass	Phaeozem	Rainfall-fed	Subsoil	Mucoromycota	6255.61
Fallow	Phaeozem	Rainfall-fed	Subsoil	Mucoromycota	1827.24
Legume/Grass	Phaeozem	Rainfall-fed	Subsoil	Mucoromycota	2496.78
Brassica/Grass	Podzol	Rainfall-fed	Subsoil	Mucoromycota	4835.72
Fallow	Podzol	Rainfall-fed	Subsoil	Mucoromycota	191780
Legume/Grass	Podzol	Rainfall-fed	Subsoil	Mucoromycota	30367.3
Brassica/Grass	Luvisol	Drought	Topsoil	Mucoromycota	724115
Fallow	Luvisol	Drought	Topsoil	Mucoromycota	1.13369e+06
Legume/Grass	Luvisol	Drought	Topsoil	Mucoromycota	271509
Brassica/Grass	Phaeozem	Drought	Topsoil	Mucoromycota	1.42473e+06
Fallow	Phaeozem	Drought	Topsoil	Mucoromycota	355682
Legume/Grass	Phaeozem	Drought	Topsoil	Mucoromycota	722228
Brassica/Grass	Podzol	Drought	Topsoil	Mucoromycota	508691
Fallow	Podzol	Drought	Topsoil	Mucoromycota	243035
Legume/Grass	Podzol	Drought	Topsoil	Mucoromycota	306957
Brassica/Grass	Luvisol	Rainfall-fed	Topsoil	Mucoromycota	151608
Fallow	Luvisol	Rainfall-fed	Topsoil	Mucoromycota	527511
Legume/Grass	Luvisol	Rainfall-fed	Topsoil	Mucoromycota	1.26447e+06
Brassica/Grass	Phaeozem	Rainfall-fed	Topsoil	Mucoromycota	1.03852e+06
Fallow	Phaeozem	Rainfall-fed	Topsoil	Mucoromycota	2.16122e+06
Legume/Grass	Phaeozem	Rainfall-fed	Topsoil	Mucoromycota	1.13733e+06
Brassica/Grass	Podzol	Rainfall-fed	Topsoil	Mucoromycota	49710.8
Fallow	Podzol	Rainfall-fed	Topsoil	Mucoromycota	348670
Legume/Grass	Podzol	Rainfall-fed	Topsoil	Mucoromycota	306319
Brassica/Grass	Luvisol	Drought	Subsoil	Olpidiomycota	66.0989
Fallow	Luvisol	Drought	Subsoil	Olpidiomycota	0
Legume/Grass	Luvisol	Drought	Subsoil	Olpidiomycota	0
Brassica/Grass	Phaeozem	Drought	Subsoil	Olpidiomycota	0
Fallow	Phaeozem	Drought	Subsoil	Olpidiomycota	0
Legume/Grass	Phaeozem	Drought	Subsoil	Olpidiomycota	0
Brassica/Grass	Podzol	Drought	Subsoil	Olpidiomycota	0
Fallow	Podzol	Drought	Subsoil	Olpidiomycota	0
Legume/Grass	Podzol	Drought	Subsoil	Olpidiomycota	0
Brassica/Grass	Luvisol	Rainfall-fed	Subsoil	Olpidiomycota	0
Fallow	Luvisol	Rainfall-fed	Subsoil	Olpidiomycota	68.3801
Legume/Grass	Luvisol	Rainfall-fed	Subsoil	Olpidiomycota	0
Brassica/Grass	Phaeozem	Rainfall-fed	Subsoil	Olpidiomycota	0
Fallow	Phaeozem	Rainfall-fed	Subsoil	Olpidiomycota	0
Legume/Grass	Phaeozem	Rainfall-fed	Subsoil	Olpidiomycota	0
Brassica/Grass	Podzol	Rainfall-fed	Subsoil	Olpidiomycota	0
Fallow	Podzol	Rainfall-fed	Subsoil	Olpidiomycota	0
Legume/Grass	Podzol	Rainfall-fed	Subsoil	Olpidiomycota	0
Brassica/Grass	Luvisol	Drought	Topsoil	Olpidiomycota	210.698
Fallow	Luvisol	Drought	Topsoil	Olpidiomycota	65.9148
Legume/Grass	Luvisol	Drought	Topsoil	Olpidiomycota	7878.99
Brassica/Grass	Phaeozem	Drought	Topsoil	Olpidiomycota	2987.48
Fallow	Phaeozem	Drought	Topsoil	Olpidiomycota	185.24
Legume/Grass	Phaeozem	Drought	Topsoil	Olpidiomycota	1095.06
Brassica/Grass	Podzol	Drought	Topsoil	Olpidiomycota	0
Fallow	Podzol	Drought	Topsoil	Olpidiomycota	0
Legume/Grass	Podzol	Drought	Topsoil	Olpidiomycota	28.6142
Brassica/Grass	Luvisol	Rainfall-fed	Topsoil	Olpidiomycota	109.178
Fallow	Luvisol	Rainfall-fed	Topsoil	Olpidiomycota	223.516
Legume/Grass	Luvisol	Rainfall-fed	Topsoil	Olpidiomycota	58.0903
Brassica/Grass	Phaeozem	Rainfall-fed	Topsoil	Olpidiomycota	498.739
Fallow	Phaeozem	Rainfall-fed	Topsoil	Olpidiomycota	1648.34
Legume/Grass	Phaeozem	Rainfall-fed	Topsoil	Olpidiomycota	1387.37
Brassica/Grass	Podzol	Rainfall-fed	Topsoil	Olpidiomycota	248.51
Fallow	Podzol	Rainfall-fed	Topsoil	Olpidiomycota	469.47
Legume/Grass	Podzol	Rainfall-fed	Topsoil	Olpidiomycota	0
Brassica/Grass	Luvisol	Drought	Subsoil	Unclassified Fungi	162203
Fallow	Luvisol	Drought	Subsoil	Unclassified Fungi	107264
Legume/Grass	Luvisol	Drought	Subsoil	Unclassified Fungi	163412
Brassica/Grass	Phaeozem	Drought	Subsoil	Unclassified Fungi	62356.2
Fallow	Phaeozem	Drought	Subsoil	Unclassified Fungi	80123.5
Legume/Grass	Phaeozem	Drought	Subsoil	Unclassified Fungi	49228.2
Brassica/Grass	Podzol	Drought	Subsoil	Unclassified Fungi	251841
Fallow	Podzol	Drought	Subsoil	Unclassified Fungi	937753
Legume/Grass	Podzol	Drought	Subsoil	Unclassified Fungi	41844.8
Brassica/Grass	Luvisol	Rainfall-fed	Subsoil	Unclassified Fungi	1.92351e+06
Fallow	Luvisol	Rainfall-fed	Subsoil	Unclassified Fungi	620204
Legume/Grass	Luvisol	Rainfall-fed	Subsoil	Unclassified Fungi	820567
Brassica/Grass	Phaeozem	Rainfall-fed	Subsoil	Unclassified Fungi	23156.7
Fallow	Phaeozem	Rainfall-fed	Subsoil	Unclassified Fungi	4466.83
Legume/Grass	Phaeozem	Rainfall-fed	Subsoil	Unclassified Fungi	3729.15
Brassica/Grass	Podzol	Rainfall-fed	Subsoil	Unclassified Fungi	74616.2
Fallow	Podzol	Rainfall-fed	Subsoil	Unclassified Fungi	818246
Legume/Grass	Podzol	Rainfall-fed	Subsoil	Unclassified Fungi	54587.6
Brassica/Grass	Luvisol	Drought	Topsoil	Unclassified Fungi	924029
Fallow	Luvisol	Drought	Topsoil	Unclassified Fungi	911644
Legume/Grass	Luvisol	Drought	Topsoil	Unclassified Fungi	466842
Brassica/Grass	Phaeozem	Drought	Topsoil	Unclassified Fungi	2.17916e+06
Fallow	Phaeozem	Drought	Topsoil	Unclassified Fungi	737018
Legume/Grass	Phaeozem	Drought	Topsoil	Unclassified Fungi	1.38406e+06
Brassica/Grass	Podzol	Drought	Topsoil	Unclassified Fungi	1.48489e+06
Fallow	Podzol	Drought	Topsoil	Unclassified Fungi	951054
Legume/Grass	Podzol	Drought	Topsoil	Unclassified Fungi	803392
Brassica/Grass	Luvisol	Rainfall-fed	Topsoil	Unclassified Fungi	222524
Fallow	Luvisol	Rainfall-fed	Topsoil	Unclassified Fungi	806639
Legume/Grass	Luvisol	Rainfall-fed	Topsoil	Unclassified Fungi	2.38624e+06
Brassica/Grass	Phaeozem	Rainfall-fed	Topsoil	Unclassified Fungi	2.12067e+06
Fallow	Phaeozem	Rainfall-fed	Topsoil	Unclassified Fungi	1.68918e+06
Legume/Grass	Phaeozem	Rainfall-fed	Topsoil	Unclassified Fungi	3.773e+06
Brassica/Grass	Podzol	Rainfall-fed	Topsoil	Unclassified Fungi	113766
Fallow	Podzol	Rainfall-fed	Topsoil	Unclassified Fungi	2.50953e+06
Legume/Grass	Podzol	Rainfall-fed	Topsoil	Unclassified Fungi	789511
Brassica/Grass	Luvisol	Drought	Subsoil	Zoopagomycota	30499.3
Fallow	Luvisol	Drought	Subsoil	Zoopagomycota	16046.8
Legume/Grass	Luvisol	Drought	Subsoil	Zoopagomycota	21885.8
Brassica/Grass	Phaeozem	Drought	Subsoil	Zoopagomycota	5428.18
Fallow	Phaeozem	Drought	Subsoil	Zoopagomycota	1234.71
Legume/Grass	Phaeozem	Drought	Subsoil	Zoopagomycota	1335.64
Brassica/Grass	Podzol	Drought	Subsoil	Zoopagomycota	1420.87
Fallow	Podzol	Drought	Subsoil	Zoopagomycota	1460.86
Legume/Grass	Podzol	Drought	Subsoil	Zoopagomycota	1090.39
Brassica/Grass	Luvisol	Rainfall-fed	Subsoil	Zoopagomycota	69667
Fallow	Luvisol	Rainfall-fed	Subsoil	Zoopagomycota	54441.8
Legume/Grass	Luvisol	Rainfall-fed	Subsoil	Zoopagomycota	3921.36
Brassica/Grass	Phaeozem	Rainfall-fed	Subsoil	Zoopagomycota	1044.99
Fallow	Phaeozem	Rainfall-fed	Subsoil	Zoopagomycota	195.647
Legume/Grass	Phaeozem	Rainfall-fed	Subsoil	Zoopagomycota	119.031
Brassica/Grass	Podzol	Rainfall-fed	Subsoil	Zoopagomycota	20.056
Fallow	Podzol	Rainfall-fed	Subsoil	Zoopagomycota	1422
Legume/Grass	Podzol	Rainfall-fed	Subsoil	Zoopagomycota	373.206
Brassica/Grass	Luvisol	Drought	Topsoil	Zoopagomycota	32050
Fallow	Luvisol	Drought	Topsoil	Zoopagomycota	191957
Legume/Grass	Luvisol	Drought	Topsoil	Zoopagomycota	43674
Brassica/Grass	Phaeozem	Drought	Topsoil	Zoopagomycota	702349
Fallow	Phaeozem	Drought	Topsoil	Zoopagomycota	134590
Legume/Grass	Phaeozem	Drought	Topsoil	Zoopagomycota	188389
Brassica/Grass	Podzol	Drought	Topsoil	Zoopagomycota	42501.5
Fallow	Podzol	Drought	Topsoil	Zoopagomycota	7953.52
Legume/Grass	Podzol	Drought	Topsoil	Zoopagomycota	122449
Brassica/Grass	Luvisol	Rainfall-fed	Topsoil	Zoopagomycota	25413.3
Fallow	Luvisol	Rainfall-fed	Topsoil	Zoopagomycota	117797
Legume/Grass	Luvisol	Rainfall-fed	Topsoil	Zoopagomycota	250715
Brassica/Grass	Phaeozem	Rainfall-fed	Topsoil	Zoopagomycota	546343
Fallow	Phaeozem	Rainfall-fed	Topsoil	Zoopagomycota	888626
Legume/Grass	Phaeozem	Rainfall-fed	Topsoil	Zoopagomycota	460838
Brassica/Grass	Podzol	Rainfall-fed	Topsoil	Zoopagomycota	1447.01
Fallow	Podzol	Rainfall-fed	Topsoil	Zoopagomycota	25824.3
Legume/Grass	Podzol	Rainfall-fed	Topsoil	Zoopagomycota	36548.7
Supplementary Table S4e
Summary of pairwise significance tests using multivariate analysis of variance (MANOVA) of the phylotype abundances across all the study parameters after normalising with absolute ITS2 gene copies
Confidence intervals: *p < 0.05, **p < 0.01, ***p < 0.001, ****p < 0.0001
Total number of samples, n = 106.
Soil_type_A	Soil_type_B	Variation_A	Variation_B	Depth_A	Depth_B	Condition_A	Condition_B	p.value_adjusted	p.value_adjusted.significance
Phaeozem	Phaeozem	Legume/Grass	Fallow	Topsoil	Subsoil	Rainfall_fed	Rainfall_fed	0.000690516	***
Phaeozem	Podzol	Legume/Grass	Brassica/Grass	Topsoil	Subsoil	Rainfall_fed	Rainfall_fed	0.000706331	***
Phaeozem	Phaeozem	Legume/Grass	Brassica/Grass	Topsoil	Subsoil	Rainfall_fed	Rainfall_fed	0.000707892	***
Phaeozem	Podzol	Legume/Grass	Legume/Grass	Topsoil	Subsoil	Rainfall_fed	Drought	0.00071824	***
Phaeozem	Podzol	Legume/Grass	Legume/Grass	Topsoil	Subsoil	Rainfall_fed	Rainfall_fed	0.000725842	***
Phaeozem	Phaeozem	Legume/Grass	Fallow	Topsoil	Subsoil	Rainfall_fed	Drought	0.000741971	***
Phaeozem	Phaeozem	Legume/Grass	Brassica/Grass	Topsoil	Subsoil	Rainfall_fed	Drought	0.000914945	***
Phaeozem	Podzol	Legume/Grass	Brassica/Grass	Topsoil	Subsoil	Rainfall_fed	Drought	0.000924557	***
Phaeozem	Luvisol	Legume/Grass	Brassica/Grass	Topsoil	Subsoil	Rainfall_fed	Drought	0.00109431	**
Phaeozem	Phaeozem	Legume/Grass	Legume/Grass	Topsoil	Subsoil	Rainfall_fed	Drought	0.00146163	**
Phaeozem	Luvisol	Legume/Grass	Legume/Grass	Topsoil	Subsoil	Rainfall_fed	Rainfall_fed	0.00152031	**
Phaeozem	Luvisol	Legume/Grass	Legume/Grass	Topsoil	Subsoil	Rainfall_fed	Drought	0.00189085	**
Phaeozem	Phaeozem	Legume/Grass	Legume/Grass	Topsoil	Subsoil	Rainfall_fed	Rainfall_fed	0.0031068	**
Phaeozem	Luvisol	Legume/Grass	Fallow	Topsoil	Subsoil	Rainfall_fed	Drought	0.00440785	**
Phaeozem	Podzol	Legume/Grass	Fallow	Topsoil	Subsoil	Rainfall_fed	Drought	0.00761206	**
Phaeozem	Podzol	Legume/Grass	Fallow	Topsoil	Subsoil	Rainfall_fed	Rainfall_fed	0.00817499	**
Phaeozem	Luvisol	Legume/Grass	Fallow	Topsoil	Subsoil	Rainfall_fed	Rainfall_fed	0.0115677	*
Phaeozem	Podzol	Legume/Grass	Brassica/Grass	Topsoil	Topsoil	Rainfall_fed	Rainfall_fed	0.0118332	*
Phaeozem	Phaeozem	Brassica/Grass	Fallow	Topsoil	Subsoil	Rainfall_fed	Rainfall_fed	0.0118651	*
Phaeozem	Podzol	Brassica/Grass	Brassica/Grass	Topsoil	Subsoil	Rainfall_fed	Rainfall_fed	0.0120979	*
Phaeozem	Phaeozem	Brassica/Grass	Brassica/Grass	Topsoil	Subsoil	Rainfall_fed	Rainfall_fed	0.0121208	*
Phaeozem	Podzol	Brassica/Grass	Legume/Grass	Topsoil	Subsoil	Rainfall_fed	Drought	0.0122726	*
Phaeozem	Podzol	Brassica/Grass	Legume/Grass	Topsoil	Subsoil	Rainfall_fed	Rainfall_fed	0.0123839	*
Phaeozem	Phaeozem	Brassica/Grass	Fallow	Topsoil	Subsoil	Rainfall_fed	Drought	0.0126194	*
Phaeozem	Phaeozem	Brassica/Grass	Brassica/Grass	Topsoil	Subsoil	Rainfall_fed	Drought	0.0150933	*
Phaeozem	Podzol	Brassica/Grass	Brassica/Grass	Topsoil	Subsoil	Rainfall_fed	Drought	0.0152282	*
Phaeozem	Luvisol	Brassica/Grass	Brassica/Grass	Topsoil	Subsoil	Rainfall_fed	Drought	0.0175724	*
Phaeozem	Luvisol	Legume/Grass	Brassica/Grass	Topsoil	Subsoil	Rainfall_fed	Rainfall_fed	0.0192898	*
Phaeozem	Phaeozem	Brassica/Grass	Legume/Grass	Topsoil	Subsoil	Rainfall_fed	Drought	0.0207271	*
Phaeozem	Luvisol	Brassica/Grass	Legume/Grass	Topsoil	Subsoil	Rainfall_fed	Rainfall_fed	0.0231842	*
Phaeozem	Phaeozem	Fallow	Fallow	Topsoil	Subsoil	Rainfall_fed	Rainfall_fed	0.0238816	*
Phaeozem	Podzol	Fallow	Brassica/Grass	Topsoil	Subsoil	Rainfall_fed	Rainfall_fed	0.0243229	*
Phaeozem	Phaeozem	Fallow	Brassica/Grass	Topsoil	Subsoil	Rainfall_fed	Rainfall_fed	0.0243663	*
Phaeozem	Podzol	Fallow	Legume/Grass	Topsoil	Subsoil	Rainfall_fed	Drought	0.0246537	*
Phaeozem	Podzol	Fallow	Legume/Grass	Topsoil	Subsoil	Rainfall_fed	Rainfall_fed	0.0248642	*
Phaeozem	Phaeozem	Fallow	Fallow	Topsoil	Subsoil	Rainfall_fed	Drought	0.0253092	*
Phaeozem	Luvisol	Brassica/Grass	Legume/Grass	Topsoil	Subsoil	Rainfall_fed	Drought	0.0257455	*
Phaeozem	Luvisol	Legume/Grass	Brassica/Grass	Topsoil	Topsoil	Rainfall_fed	Rainfall_fed	0.0285109	*
Phaeozem	Phaeozem	Fallow	Brassica/Grass	Topsoil	Subsoil	Rainfall_fed	Drought	0.0299493	*
Phaeozem	Podzol	Fallow	Brassica/Grass	Topsoil	Subsoil	Rainfall_fed	Drought	0.0302007	*
Phaeozem	Podzol	Legume/Grass	Fallow	Topsoil	Topsoil	Rainfall_fed	Drought	0.0329167	*
Phaeozem	Luvisol	Fallow	Brassica/Grass	Topsoil	Subsoil	Rainfall_fed	Drought	0.0345411	*
Phaeozem	Phaeozem	Brassica/Grass	Legume/Grass	Topsoil	Subsoil	Rainfall_fed	Rainfall_fed	0.0351955	*
Phaeozem	Phaeozem	Fallow	Legume/Grass	Topsoil	Subsoil	Rainfall_fed	Drought	0.039496	*
Phaeozem	Luvisol	Fallow	Legume/Grass	Topsoil	Subsoil	Rainfall_fed	Rainfall_fed	0.0447529	*
Phaeozem	Luvisol	Brassica/Grass	Fallow	Topsoil	Subsoil	Rainfall_fed	Drought	0.0469918	*
Phaeozem	Luvisol	Fallow	Legume/Grass	Topsoil	Subsoil	Rainfall_fed	Drought	0.0483671	*
Phaeozem	Luvisol	Legume/Grass	Legume/Grass	Topsoil	Topsoil	Rainfall_fed	Drought	0.0523134	ns
Phaeozem	Phaeozem	Fallow	Legume/Grass	Topsoil	Subsoil	Rainfall_fed	Rainfall_fed	0.0630433	ns
Phaeozem	Podzol	Brassica/Grass	Fallow	Topsoil	Subsoil	Rainfall_fed	Drought	0.0731437	ns
Phaeozem	Podzol	Brassica/Grass	Fallow	Topsoil	Subsoil	Rainfall_fed	Rainfall_fed	0.0774239	ns
Phaeozem	Luvisol	Fallow	Fallow	Topsoil	Subsoil	Rainfall_fed	Drought	0.0824147	ns
Phaeozem	Phaeozem	Fallow	Brassica/Grass	Subsoil	Topsoil	Rainfall_fed	Drought	0.0835763	ns
Podzol	Phaeozem	Brassica/Grass	Brassica/Grass	Subsoil	Topsoil	Rainfall_fed	Drought	0.0848967	ns
Phaeozem	Phaeozem	Brassica/Grass	Brassica/Grass	Subsoil	Topsoil	Rainfall_fed	Drought	0.0850265	ns
Phaeozem	Podzol	Brassica/Grass	Legume/Grass	Topsoil	Subsoil	Drought	Drought	0.0858836	ns
Podzol	Phaeozem	Legume/Grass	Brassica/Grass	Subsoil	Topsoil	Rainfall_fed	Drought	0.0865103	ns
Phaeozem	Phaeozem	Brassica/Grass	Fallow	Topsoil	Subsoil	Drought	Drought	0.0878316	ns
Phaeozem	Podzol	Legume/Grass	Legume/Grass	Topsoil	Topsoil	Rainfall_fed	Drought	0.0902506	ns
Podzol	Phaeozem	Brassica/Grass	Brassica/Grass	Topsoil	Topsoil	Rainfall_fed	Rainfall_fed	0.0915891	ns
Phaeozem	Phaeozem	Brassica/Grass	Brassica/Grass	Topsoil	Subsoil	Drought	Drought	0.101358	ns
Phaeozem	Luvisol	Brassica/Grass	Fallow	Topsoil	Subsoil	Rainfall_fed	Rainfall_fed	0.10176	ns
Phaeozem	Podzol	Brassica/Grass	Brassica/Grass	Topsoil	Subsoil	Drought	Drought	0.102078	ns
Phaeozem	Luvisol	Brassica/Grass	Brassica/Grass	Topsoil	Subsoil	Drought	Drought	0.114332	ns
Podzol	Phaeozem	Legume/Grass	Legume/Grass	Topsoil	Topsoil	Rainfall_fed	Rainfall_fed	0.115166	ns
Phaeozem	Phaeozem	Brassica/Grass	Legume/Grass	Topsoil	Subsoil	Drought	Drought	0.123654	ns
Phaeozem	Podzol	Fallow	Fallow	Topsoil	Subsoil	Rainfall_fed	Drought	0.123717	ns
Phaeozem	Podzol	Fallow	Fallow	Topsoil	Subsoil	Rainfall_fed	Rainfall_fed	0.130296	ns
Luvisol	Phaeozem	Legume/Grass	Brassica/Grass	Subsoil	Topsoil	Rainfall_fed	Drought	0.14194	ns
Phaeozem	Luvisol	Brassica/Grass	Legume/Grass	Topsoil	Subsoil	Drought	Drought	0.146476	ns
Phaeozem	Podzol	Fallow	Brassica/Grass	Topsoil	Topsoil	Rainfall_fed	Rainfall_fed	0.147116	ns
Phaeozem	Phaeozem	Legume/Grass	Fallow	Topsoil	Topsoil	Rainfall_fed	Drought	0.149123	ns
Phaeozem	Luvisol	Fallow	Fallow	Topsoil	Subsoil	Rainfall_fed	Rainfall_fed	0.166894	ns
Phaeozem	Luvisol	Brassica/Grass	Brassica/Grass	Topsoil	Subsoil	Rainfall_fed	Rainfall_fed	0.172644	ns
Phaeozem	Phaeozem	Legume/Grass	Brassica/Grass	Subsoil	Topsoil	Rainfall_fed	Drought	0.174733	ns
Phaeozem	Luvisol	Brassica/Grass	Brassica/Grass	Topsoil	Topsoil	Rainfall_fed	Rainfall_fed	0.18043	ns
Phaeozem	Luvisol	Legume/Grass	Fallow	Topsoil	Topsoil	Rainfall_fed	Rainfall_fed	0.184119	ns
Phaeozem	Podzol	Brassica/Grass	Fallow	Topsoil	Topsoil	Rainfall_fed	Drought	0.200645	ns
Phaeozem	Luvisol	Brassica/Grass	Fallow	Topsoil	Subsoil	Drought	Drought	0.217486	ns
Phaeozem	Podzol	Legume/Grass	Fallow	Topsoil	Topsoil	Rainfall_fed	Rainfall_fed	0.221541	ns
Phaeozem	Luvisol	Fallow	Brassica/Grass	Topsoil	Topsoil	Rainfall_fed	Rainfall_fed	0.270453	ns
Phaeozem	Luvisol	Fallow	Brassica/Grass	Topsoil	Subsoil	Rainfall_fed	Rainfall_fed	0.275882	ns
Phaeozem	Luvisol	Brassica/Grass	Legume/Grass	Topsoil	Topsoil	Rainfall_fed	Drought	0.279479	ns
Phaeozem	Podzol	Fallow	Fallow	Topsoil	Topsoil	Rainfall_fed	Drought	0.296927	ns
Phaeozem	Podzol	Brassica/Grass	Fallow	Topsoil	Subsoil	Drought	Drought	0.300196	ns
Podzol	Phaeozem	Fallow	Brassica/Grass	Subsoil	Topsoil	Rainfall_fed	Drought	0.312492	ns
Podzol	Phaeozem	Brassica/Grass	Brassica/Grass	Topsoil	Topsoil	Rainfall_fed	Drought	0.327046	ns
Luvisol	Phaeozem	Legume/Grass	Fallow	Topsoil	Subsoil	Rainfall_fed	Rainfall_fed	0.349847	ns
Luvisol	Podzol	Legume/Grass	Brassica/Grass	Topsoil	Subsoil	Rainfall_fed	Rainfall_fed	0.353571	ns
Luvisol	Phaeozem	Legume/Grass	Brassica/Grass	Topsoil	Subsoil	Rainfall_fed	Rainfall_fed	0.353935	ns
Luvisol	Podzol	Legume/Grass	Legume/Grass	Topsoil	Subsoil	Rainfall_fed	Drought	0.356336	ns
Luvisol	Podzol	Legume/Grass	Legume/Grass	Topsoil	Subsoil	Rainfall_fed	Rainfall_fed	0.358083	ns
Luvisol	Phaeozem	Legume/Grass	Fallow	Topsoil	Subsoil	Rainfall_fed	Drought	0.361747	ns
Phaeozem	Luvisol	Legume/Grass	Brassica/Grass	Topsoil	Topsoil	Rainfall_fed	Drought	0.367662	ns
Luvisol	Phaeozem	Fallow	Brassica/Grass	Subsoil	Topsoil	Rainfall_fed	Drought	0.377216	ns
Phaeozem	Luvisol	Fallow	Legume/Grass	Topsoil	Topsoil	Rainfall_fed	Drought	0.395513	ns
Phaeozem	Podzol	Legume/Grass	Brassica/Grass	Topsoil	Topsoil	Rainfall_fed	Drought	0.396383	ns
Luvisol	Phaeozem	Legume/Grass	Brassica/Grass	Topsoil	Subsoil	Rainfall_fed	Drought	0.397754	ns
Luvisol	Podzol	Legume/Grass	Brassica/Grass	Topsoil	Subsoil	Rainfall_fed	Drought	0.399599	ns
Phaeozem	Podzol	Brassica/Grass	Legume/Grass	Topsoil	Topsoil	Rainfall_fed	Drought	0.402188	ns
Luvisol	Luvisol	Legume/Grass	Brassica/Grass	Topsoil	Subsoil	Rainfall_fed	Drought	0.429953	ns
Luvisol	Phaeozem	Legume/Grass	Legume/Grass	Topsoil	Subsoil	Rainfall_fed	Drought	0.437715	ns
Podzol	Phaeozem	Legume/Grass	Brassica/Grass	Topsoil	Topsoil	Rainfall_fed	Rainfall_fed	0.467911	ns
Luvisol	Luvisol	Legume/Grass	Legume/Grass	Topsoil	Subsoil	Rainfall_fed	Drought	0.486951	ns
Luvisol	Luvisol	Legume/Grass	Legume/Grass	Topsoil	Subsoil	Rainfall_fed	Rainfall_fed	0.492036	ns
Luvisol	Phaeozem	Brassica/Grass	Brassica/Grass	Topsoil	Topsoil	Rainfall_fed	Drought	0.514459	ns
Luvisol	Phaeozem	Legume/Grass	Legume/Grass	Topsoil	Subsoil	Rainfall_fed	Rainfall_fed	0.521957	ns
Phaeozem	Podzol	Fallow	Legume/Grass	Topsoil	Topsoil	Rainfall_fed	Drought	0.535991	ns
Phaeozem	Phaeozem	Brassica/Grass	Fallow	Topsoil	Topsoil	Rainfall_fed	Drought	0.544243	ns
Podzol	Phaeozem	Fallow	Brassica/Grass	Topsoil	Topsoil	Drought	Drought	0.549042	ns
Luvisol	Phaeozem	Brassica/Grass	Brassica/Grass	Subsoil	Topsoil	Rainfall_fed	Drought	0.564092	ns
Luvisol	Luvisol	Legume/Grass	Fallow	Topsoil	Subsoil	Rainfall_fed	Drought	0.593907	ns
Podzol	Phaeozem	Legume/Grass	Fallow	Topsoil	Topsoil	Rainfall_fed	Rainfall_fed	0.605322	ns
Luvisol	Phaeozem	Fallow	Brassica/Grass	Topsoil	Topsoil	Rainfall_fed	Rainfall_fed	0.610642	ns
Luvisol	Phaeozem	Legume/Grass	Brassica/Grass	Topsoil	Topsoil	Drought	Drought	0.66374	ns
Podzol	Phaeozem	Fallow	Brassica/Grass	Topsoil	Topsoil	Rainfall_fed	Rainfall_fed	0.670897	ns
Phaeozem	Phaeozem	Fallow	Fallow	Topsoil	Topsoil	Rainfall_fed	Drought	0.680885	ns
Phaeozem	Phaeozem	Legume/Grass	Legume/Grass	Topsoil	Topsoil	Rainfall_fed	Drought	0.689141	ns
Luvisol	Podzol	Legume/Grass	Fallow	Topsoil	Subsoil	Rainfall_fed	Drought	0.706149	ns
Luvisol	Podzol	Legume/Grass	Brassica/Grass	Topsoil	Topsoil	Rainfall_fed	Rainfall_fed	0.711097	ns
Luvisol	Podzol	Legume/Grass	Fallow	Topsoil	Subsoil	Rainfall_fed	Rainfall_fed	0.720353	ns
Phaeozem	Luvisol	Fallow	Fallow	Topsoil	Topsoil	Rainfall_fed	Rainfall_fed	0.742283	ns
Luvisol	Luvisol	Legume/Grass	Fallow	Topsoil	Subsoil	Rainfall_fed	Rainfall_fed	0.786434	ns
Podzol	Phaeozem	Legume/Grass	Brassica/Grass	Topsoil	Topsoil	Drought	Drought	0.794322	ns
Podzol	Phaeozem	Fallow	Fallow	Topsoil	Topsoil	Rainfall_fed	Rainfall_fed	0.794427	ns
Phaeozem	Luvisol	Legume/Grass	Fallow	Topsoil	Topsoil	Rainfall_fed	Drought	0.81348	ns
Phaeozem	Luvisol	Brassica/Grass	Brassica/Grass	Topsoil	Topsoil	Rainfall_fed	Drought	0.833712	ns
Podzol	Phaeozem	Legume/Grass	Brassica/Grass	Topsoil	Topsoil	Rainfall_fed	Drought	0.846344	ns
Phaeozem	Podzol	Brassica/Grass	Brassica/Grass	Topsoil	Topsoil	Rainfall_fed	Drought	0.855929	ns
Luvisol	Luvisol	Legume/Grass	Brassica/Grass	Topsoil	Topsoil	Rainfall_fed	Rainfall_fed	0.870963	ns
Luvisol	Podzol	Legume/Grass	Fallow	Topsoil	Topsoil	Rainfall_fed	Drought	0.891562	ns
Phaeozem	Phaeozem	Fallow	Brassica/Grass	Topsoil	Topsoil	Drought	Drought	0.894449	ns
Phaeozem	Luvisol	Fallow	Brassica/Grass	Topsoil	Topsoil	Rainfall_fed	Drought	0.91665	ns
Luvisol	Phaeozem	Fallow	Brassica/Grass	Topsoil	Topsoil	Rainfall_fed	Drought	0.927173	ns
Luvisol	Luvisol	Legume/Grass	Brassica/Grass	Topsoil	Subsoil	Rainfall_fed	Rainfall_fed	0.929617	ns
Phaeozem	Podzol	Fallow	Brassica/Grass	Topsoil	Topsoil	Rainfall_fed	Drought	0.930896	ns
Luvisol	Luvisol	Legume/Grass	Legume/Grass	Topsoil	Topsoil	Rainfall_fed	Drought	0.944574	ns
Podzol	Phaeozem	Fallow	Brassica/Grass	Topsoil	Topsoil	Rainfall_fed	Drought	0.950549	ns
Phaeozem	Luvisol	Fallow	Fallow	Subsoil	Topsoil	Rainfall_fed	Drought	0.964133	ns
Podzol	Luvisol	Brassica/Grass	Fallow	Subsoil	Topsoil	Rainfall_fed	Drought	0.965242	ns
Phaeozem	Luvisol	Brassica/Grass	Fallow	Subsoil	Topsoil	Rainfall_fed	Drought	0.965349	ns
Luvisol	Podzol	Fallow	Legume/Grass	Topsoil	Subsoil	Drought	Drought	0.966045	ns
Podzol	Luvisol	Legume/Grass	Fallow	Subsoil	Topsoil	Rainfall_fed	Drought	0.966544	ns
Luvisol	Phaeozem	Fallow	Fallow	Topsoil	Subsoil	Drought	Drought	0.967568	ns
Luvisol	Phaeozem	Fallow	Brassica/Grass	Topsoil	Subsoil	Drought	Drought	0.976211	ns
Luvisol	Podzol	Fallow	Brassica/Grass	Topsoil	Subsoil	Drought	Drought	0.976592	ns
Phaeozem	Phaeozem	Brassica/Grass	Legume/Grass	Topsoil	Topsoil	Rainfall_fed	Drought	0.977844	ns
Luvisol	Phaeozem	Fallow	Legume/Grass	Topsoil	Subsoil	Drought	Drought	0.979387	ns
Luvisol	Podzol	Legume/Grass	Legume/Grass	Topsoil	Topsoil	Rainfall_fed	Drought	0.981113	ns
Luvisol	Luvisol	Fallow	Brassica/Grass	Topsoil	Subsoil	Drought	Drought	0.982117	ns
Luvisol	Luvisol	Fallow	Legume/Grass	Topsoil	Subsoil	Drought	Drought	0.986716	ns
Phaeozem	Luvisol	Legume/Grass	Fallow	Subsoil	Topsoil	Rainfall_fed	Drought	0.986929	ns
Phaeozem	Luvisol	Brassica/Grass	Brassica/Grass	Topsoil	Topsoil	Drought	Drought	0.989059	ns
Podzol	Luvisol	Legume/Grass	Legume/Grass	Topsoil	Topsoil	Rainfall_fed	Rainfall_fed	0.989843	ns
Luvisol	Luvisol	Legume/Grass	Fallow	Subsoil	Topsoil	Rainfall_fed	Drought	0.989972	ns
Phaeozem	Phaeozem	Fallow	Legume/Grass	Subsoil	Topsoil	Rainfall_fed	Drought	0.991142	ns
Podzol	Phaeozem	Brassica/Grass	Legume/Grass	Subsoil	Topsoil	Rainfall_fed	Drought	0.991508	ns
Phaeozem	Phaeozem	Brassica/Grass	Legume/Grass	Subsoil	Topsoil	Rainfall_fed	Drought	0.991543	ns
Phaeozem	Podzol	Legume/Grass	Legume/Grass	Topsoil	Subsoil	Drought	Drought	0.991771	ns
Podzol	Phaeozem	Legume/Grass	Legume/Grass	Subsoil	Topsoil	Rainfall_fed	Drought	0.991932	ns
Podzol	Phaeozem	Brassica/Grass	Brassica/Grass	Topsoil	Topsoil	Drought	Drought	0.991959	ns
Phaeozem	Phaeozem	Legume/Grass	Fallow	Topsoil	Subsoil	Drought	Drought	0.992262	ns
Luvisol	Luvisol	Fallow	Fallow	Topsoil	Subsoil	Drought	Drought	0.993475	ns
Phaeozem	Phaeozem	Fallow	Legume/Grass	Topsoil	Topsoil	Rainfall_fed	Drought	0.993793	ns
Phaeozem	Luvisol	Brassica/Grass	Fallow	Topsoil	Topsoil	Rainfall_fed	Drought	0.994115	ns
Phaeozem	Phaeozem	Legume/Grass	Brassica/Grass	Topsoil	Subsoil	Drought	Drought	0.994891	ns
Phaeozem	Podzol	Legume/Grass	Brassica/Grass	Topsoil	Subsoil	Drought	Drought	0.995	ns
Luvisol	Phaeozem	Legume/Grass	Fallow	Topsoil	Topsoil	Rainfall_fed	Drought	0.995367	ns
Phaeozem	Phaeozem	Legume/Grass	Legume/Grass	Topsoil	Subsoil	Drought	Drought	0.99553	ns
Phaeozem	Luvisol	Legume/Grass	Brassica/Grass	Topsoil	Subsoil	Drought	Drought	0.99651	ns
Podzol	Luvisol	Brassica/Grass	Fallow	Topsoil	Topsoil	Rainfall_fed	Drought	0.997079	ns
Phaeozem	Phaeozem	Legume/Grass	Legume/Grass	Subsoil	Topsoil	Rainfall_fed	Drought	0.997339	ns
Phaeozem	Luvisol	Legume/Grass	Legume/Grass	Topsoil	Subsoil	Drought	Drought	0.9975	ns
Luvisol	Luvisol	Legume/Grass	Fallow	Topsoil	Topsoil	Rainfall_fed	Rainfall_fed	0.997843	ns
Luvisol	Podzol	Fallow	Fallow	Topsoil	Subsoil	Drought	Drought	0.998242	ns
Luvisol	Phaeozem	Legume/Grass	Legume/Grass	Subsoil	Topsoil	Rainfall_fed	Drought	0.998385	ns
Podzol	Luvisol	Fallow	Fallow	Subsoil	Topsoil	Rainfall_fed	Drought	0.998553	ns
Phaeozem	Luvisol	Fallow	Fallow	Topsoil	Topsoil	Rainfall_fed	Drought	0.998848	ns
Phaeozem	Luvisol	Legume/Grass	Fallow	Topsoil	Subsoil	Drought	Drought	0.998923	ns
Luvisol	Podzol	Legume/Grass	Fallow	Topsoil	Topsoil	Rainfall_fed	Rainfall_fed	0.999019	ns
Phaeozem	Luvisol	Legume/Grass	Legume/Grass	Topsoil	Topsoil	Rainfall_fed	Rainfall_fed	0.999381	ns
Luvisol	Luvisol	Fallow	Fallow	Subsoil	Topsoil	Rainfall_fed	Drought	0.999489	ns
Podzol	Phaeozem	Brassica/Grass	Legume/Grass	Topsoil	Topsoil	Rainfall_fed	Drought	0.99956	ns
Phaeozem	Podzol	Legume/Grass	Fallow	Topsoil	Subsoil	Drought	Drought	0.999803	ns
Luvisol	Luvisol	Brassica/Grass	Fallow	Topsoil	Topsoil	Rainfall_fed	Drought	0.999825	ns
Phaeozem	Phaeozem	Legume/Grass	Brassica/Grass	Topsoil	Topsoil	Drought	Drought	0.999834	ns
Podzol	Phaeozem	Fallow	Legume/Grass	Subsoil	Topsoil	Rainfall_fed	Drought	0.999847	ns
Podzol	Luvisol	Fallow	Fallow	Topsoil	Topsoil	Drought	Drought	0.999902	ns
Phaeozem	Podzol	Fallow	Brassica/Grass	Subsoil	Topsoil	Rainfall_fed	Drought	0.999911	ns
Podzol	Podzol	Brassica/Grass	Brassica/Grass	Subsoil	Topsoil	Rainfall_fed	Drought	0.999917	ns
Phaeozem	Podzol	Brassica/Grass	Brassica/Grass	Subsoil	Topsoil	Rainfall_fed	Drought	0.999918	ns
Podzol	Podzol	Brassica/Grass	Legume/Grass	Topsoil	Subsoil	Drought	Drought	0.999922	ns
Podzol	Podzol	Legume/Grass	Brassica/Grass	Subsoil	Topsoil	Rainfall_fed	Drought	0.999925	ns
Podzol	Phaeozem	Brassica/Grass	Fallow	Topsoil	Subsoil	Drought	Drought	0.99993	ns
Luvisol	Luvisol	Legume/Grass	Brassica/Grass	Topsoil	Topsoil	Rainfall_fed	Drought	0.999952	ns
Phaeozem	Luvisol	Fallow	Brassica/Grass	Subsoil	Topsoil	Rainfall_fed	Drought	0.999954	ns
Podzol	Luvisol	Brassica/Grass	Brassica/Grass	Subsoil	Topsoil	Rainfall_fed	Drought	0.999958	ns
Phaeozem	Luvisol	Brassica/Grass	Brassica/Grass	Subsoil	Topsoil	Rainfall_fed	Drought	0.999958	ns
Luvisol	Phaeozem	Fallow	Legume/Grass	Subsoil	Topsoil	Rainfall_fed	Drought	0.99996	ns
Luvisol	Podzol	Brassica/Grass	Legume/Grass	Topsoil	Subsoil	Drought	Drought	0.99996	ns
Podzol	Luvisol	Legume/Grass	Brassica/Grass	Subsoil	Topsoil	Rainfall_fed	Drought	0.999962	ns
Luvisol	Phaeozem	Brassica/Grass	Fallow	Topsoil	Subsoil	Drought	Drought	0.999965	ns
Podzol	Phaeozem	Brassica/Grass	Brassica/Grass	Topsoil	Subsoil	Drought	Drought	0.999967	ns
Podzol	Phaeozem	Brassica/Grass	Legume/Grass	Topsoil	Subsoil	Drought	Drought	0.999968	ns
Podzol	Podzol	Brassica/Grass	Brassica/Grass	Topsoil	Subsoil	Drought	Drought	0.999968	ns
Luvisol	Podzol	Legume/Grass	Brassica/Grass	Topsoil	Topsoil	Rainfall_fed	Drought	0.999974	ns
Phaeozem	Podzol	Legume/Grass	Brassica/Grass	Subsoil	Topsoil	Rainfall_fed	Drought	0.999983	ns
Podzol	Luvisol	Brassica/Grass	Brassica/Grass	Topsoil	Subsoil	Drought	Drought	0.999983	ns
Luvisol	Phaeozem	Brassica/Grass	Brassica/Grass	Topsoil	Subsoil	Drought	Drought	0.999984	ns
Luvisol	Phaeozem	Brassica/Grass	Legume/Grass	Topsoil	Subsoil	Drought	Drought	0.999984	ns
Luvisol	Podzol	Brassica/Grass	Brassica/Grass	Topsoil	Subsoil	Drought	Drought	0.999985	ns
Luvisol	Phaeozem	Brassica/Grass	Legume/Grass	Topsoil	Topsoil	Rainfall_fed	Drought	0.999988	ns
Podzol	Luvisol	Brassica/Grass	Legume/Grass	Topsoil	Subsoil	Drought	Drought	0.999988	ns
Luvisol	Phaeozem	Fallow	Brassica/Grass	Topsoil	Topsoil	Drought	Drought	0.999989	ns
Luvisol	Luvisol	Legume/Grass	Fallow	Topsoil	Topsoil	Drought	Drought	0.999989	ns
Phaeozem	Luvisol	Legume/Grass	Brassica/Grass	Subsoil	Topsoil	Rainfall_fed	Drought	0.999991	ns
Luvisol	Luvisol	Brassica/Grass	Brassica/Grass	Topsoil	Subsoil	Drought	Drought	0.999992	ns
Phaeozem	Podzol	Legume/Grass	Fallow	Topsoil	Topsoil	Drought	Drought	0.999994	ns
Luvisol	Luvisol	Brassica/Grass	Legume/Grass	Topsoil	Subsoil	Drought	Drought	0.999995	ns
Luvisol	Podzol	Legume/Grass	Brassica/Grass	Subsoil	Topsoil	Rainfall_fed	Drought	0.999996	ns
Podzol	Luvisol	Brassica/Grass	Fallow	Topsoil	Subsoil	Drought	Drought	0.999996	ns
Luvisol	Luvisol	Brassica/Grass	Fallow	Subsoil	Topsoil	Rainfall_fed	Drought	0.999998	ns
Luvisol	Luvisol	Legume/Grass	Brassica/Grass	Subsoil	Topsoil	Rainfall_fed	Drought	0.999998	ns
Luvisol	Luvisol	Brassica/Grass	Fallow	Topsoil	Subsoil	Drought	Drought	0.999998	ns
Podzol	Podzol	Brassica/Grass	Brassica/Grass	Topsoil	Topsoil	Rainfall_fed	Drought	0.999999	ns
Podzol	Luvisol	Brassica/Grass	Brassica/Grass	Topsoil	Topsoil	Rainfall_fed	Drought	0.999999	ns
Phaeozem	Luvisol	Legume/Grass	Legume/Grass	Topsoil	Topsoil	Drought	Drought	1	ns
Podzol	Phaeozem	Fallow	Fallow	Topsoil	Subsoil	Rainfall_fed	Rainfall_fed	1	ns
Podzol	Luvisol	Legume/Grass	Fallow	Topsoil	Topsoil	Drought	Drought	1	ns
Podzol	Podzol	Fallow	Brassica/Grass	Topsoil	Subsoil	Rainfall_fed	Rainfall_fed	1	ns
Podzol	Phaeozem	Fallow	Brassica/Grass	Topsoil	Subsoil	Rainfall_fed	Rainfall_fed	1	ns
Podzol	Podzol	Fallow	Legume/Grass	Topsoil	Subsoil	Rainfall_fed	Drought	1	ns
Podzol	Podzol	Fallow	Legume/Grass	Topsoil	Subsoil	Rainfall_fed	Rainfall_fed	1	ns
Podzol	Phaeozem	Fallow	Fallow	Topsoil	Subsoil	Rainfall_fed	Drought	1	ns
Podzol	Podzol	Brassica/Grass	Fallow	Topsoil	Subsoil	Drought	Drought	1	ns
Phaeozem	Phaeozem	Legume/Grass	Brassica/Grass	Topsoil	Topsoil	Rainfall_fed	Drought	1	ns
Podzol	Podzol	Fallow	Brassica/Grass	Subsoil	Topsoil	Rainfall_fed	Drought	1	ns
Podzol	Phaeozem	Fallow	Legume/Grass	Topsoil	Subsoil	Rainfall_fed	Drought	1	ns
Luvisol	Podzol	Brassica/Grass	Fallow	Topsoil	Subsoil	Drought	Drought	1	ns
Podzol	Phaeozem	Fallow	Brassica/Grass	Topsoil	Subsoil	Rainfall_fed	Drought	1	ns
Podzol	Podzol	Fallow	Brassica/Grass	Topsoil	Subsoil	Rainfall_fed	Drought	1	ns
Podzol	Phaeozem	Fallow	Legume/Grass	Topsoil	Subsoil	Rainfall_fed	Rainfall_fed	1	ns
Podzol	Luvisol	Fallow	Brassica/Grass	Subsoil	Topsoil	Rainfall_fed	Drought	1	ns
Podzol	Luvisol	Legume/Grass	Fallow	Topsoil	Topsoil	Rainfall_fed	Drought	1	ns
Luvisol	Phaeozem	Fallow	Fallow	Topsoil	Subsoil	Rainfall_fed	Rainfall_fed	1	ns
Luvisol	Podzol	Fallow	Brassica/Grass	Topsoil	Subsoil	Rainfall_fed	Rainfall_fed	1	ns
Luvisol	Phaeozem	Fallow	Brassica/Grass	Topsoil	Subsoil	Rainfall_fed	Rainfall_fed	1	ns
Luvisol	Podzol	Fallow	Legume/Grass	Topsoil	Subsoil	Rainfall_fed	Drought	1	ns
Luvisol	Podzol	Fallow	Legume/Grass	Topsoil	Subsoil	Rainfall_fed	Rainfall_fed	1	ns
Luvisol	Phaeozem	Fallow	Fallow	Topsoil	Subsoil	Rainfall_fed	Drought	1	ns
Luvisol	Phaeozem	Brassica/Grass	Legume/Grass	Subsoil	Topsoil	Rainfall_fed	Drought	1	ns
Podzol	Luvisol	Fallow	Brassica/Grass	Topsoil	Subsoil	Rainfall_fed	Drought	1	ns
Phaeozem	Luvisol	Fallow	Brassica/Grass	Subsoil	Subsoil	Rainfall_fed	Rainfall_fed	1	ns
Podzol	Luvisol	Fallow	Legume/Grass	Topsoil	Subsoil	Rainfall_fed	Drought	1	ns
Podzol	Luvisol	Brassica/Grass	Brassica/Grass	Subsoil	Subsoil	Rainfall_fed	Rainfall_fed	1	ns
Phaeozem	Luvisol	Brassica/Grass	Brassica/Grass	Subsoil	Subsoil	Rainfall_fed	Rainfall_fed	1	ns
Luvisol	Podzol	Brassica/Grass	Legume/Grass	Subsoil	Subsoil	Rainfall_fed	Drought	1	ns
Podzol	Luvisol	Legume/Grass	Brassica/Grass	Subsoil	Subsoil	Rainfall_fed	Rainfall_fed	1	ns
Luvisol	Podzol	Fallow	Brassica/Grass	Subsoil	Topsoil	Rainfall_fed	Drought	1	ns
Luvisol	Phaeozem	Legume/Grass	Legume/Grass	Topsoil	Topsoil	Rainfall_fed	Drought	1	ns
Luvisol	Phaeozem	Brassica/Grass	Fallow	Subsoil	Subsoil	Rainfall_fed	Drought	1	ns
Luvisol	Phaeozem	Fallow	Legume/Grass	Topsoil	Subsoil	Rainfall_fed	Drought	1	ns
Luvisol	Phaeozem	Legume/Grass	Brassica/Grass	Topsoil	Topsoil	Rainfall_fed	Rainfall_fed	1	ns
Luvisol	Phaeozem	Fallow	Brassica/Grass	Topsoil	Subsoil	Rainfall_fed	Drought	1	ns
Luvisol	Podzol	Fallow	Brassica/Grass	Topsoil	Subsoil	Rainfall_fed	Drought	1	ns
Luvisol	Phaeozem	Fallow	Legume/Grass	Topsoil	Subsoil	Rainfall_fed	Rainfall_fed	1	ns
Podzol	Luvisol	Fallow	Fallow	Topsoil	Subsoil	Rainfall_fed	Drought	1	ns
Luvisol	Luvisol	Fallow	Brassica/Grass	Subsoil	Topsoil	Rainfall_fed	Drought	1	ns
Podzol	Phaeozem	Legume/Grass	Legume/Grass	Topsoil	Topsoil	Drought	Drought	1	ns
Phaeozem	Luvisol	Fallow	Fallow	Topsoil	Topsoil	Drought	Drought	1	ns
Luvisol	Podzol	Brassica/Grass	Brassica/Grass	Topsoil	Topsoil	Rainfall_fed	Drought	1	ns
Phaeozem	Phaeozem	Fallow	Fallow	Subsoil	Topsoil	Rainfall_fed	Drought	1	ns
Podzol	Phaeozem	Brassica/Grass	Fallow	Subsoil	Topsoil	Rainfall_fed	Drought	1	ns
Phaeozem	Phaeozem	Brassica/Grass	Fallow	Subsoil	Topsoil	Rainfall_fed	Drought	1	ns
Podzol	Luvisol	Fallow	Legume/Grass	Topsoil	Subsoil	Rainfall_fed	Rainfall_fed	1	ns
Luvisol	Phaeozem	Brassica/Grass	Legume/Grass	Subsoil	Subsoil	Rainfall_fed	Drought	1	ns
Phaeozem	Podzol	Fallow	Legume/Grass	Topsoil	Subsoil	Drought	Drought	1	ns
Podzol	Phaeozem	Legume/Grass	Fallow	Subsoil	Topsoil	Rainfall_fed	Drought	1	ns
Luvisol	Luvisol	Fallow	Brassica/Grass	Topsoil	Subsoil	Rainfall_fed	Drought	1	ns
Luvisol	Phaeozem	Brassica/Grass	Brassica/Grass	Subsoil	Subsoil	Rainfall_fed	Drought	1	ns
Phaeozem	Phaeozem	Fallow	Fallow	Topsoil	Subsoil	Drought	Drought	1	ns
Luvisol	Podzol	Brassica/Grass	Brassica/Grass	Subsoil	Subsoil	Rainfall_fed	Drought	1	ns
Podzol	Podzol	Fallow	Brassica/Grass	Topsoil	Topsoil	Rainfall_fed	Rainfall_fed	1	ns
Luvisol	Luvisol	Fallow	Legume/Grass	Topsoil	Subsoil	Rainfall_fed	Drought	1	ns
Luvisol	Luvisol	Brassica/Grass	Brassica/Grass	Topsoil	Topsoil	Rainfall_fed	Drought	1	ns
Phaeozem	Luvisol	Legume/Grass	Brassica/Grass	Subsoil	Subsoil	Rainfall_fed	Rainfall_fed	1	ns
Podzol	Podzol	Fallow	Brassica/Grass	Topsoil	Topsoil	Drought	Drought	1	ns
Phaeozem	Phaeozem	Fallow	Legume/Grass	Topsoil	Subsoil	Drought	Drought	1	ns
Phaeozem	Phaeozem	Fallow	Brassica/Grass	Topsoil	Subsoil	Drought	Drought	1	ns
Luvisol	Luvisol	Brassica/Grass	Brassica/Grass	Subsoil	Subsoil	Rainfall_fed	Drought	1	ns
Phaeozem	Podzol	Fallow	Brassica/Grass	Topsoil	Subsoil	Drought	Drought	1	ns
Phaeozem	Phaeozem	Legume/Grass	Fallow	Subsoil	Topsoil	Rainfall_fed	Drought	1	ns
Luvisol	Luvisol	Fallow	Fallow	Topsoil	Subsoil	Rainfall_fed	Drought	1	ns
Podzol	Phaeozem	Legume/Grass	Legume/Grass	Topsoil	Topsoil	Rainfall_fed	Drought	1	ns
Luvisol	Luvisol	Fallow	Fallow	Topsoil	Topsoil	Rainfall_fed	Drought	1	ns
Podzol	Luvisol	Fallow	Brassica/Grass	Topsoil	Topsoil	Drought	Drought	1	ns
Luvisol	Luvisol	Brassica/Grass	Legume/Grass	Subsoil	Subsoil	Rainfall_fed	Drought	1	ns
Luvisol	Luvisol	Fallow	Legume/Grass	Topsoil	Subsoil	Rainfall_fed	Rainfall_fed	1	ns
Luvisol	Podzol	Fallow	Brassica/Grass	Topsoil	Topsoil	Rainfall_fed	Rainfall_fed	1	ns
Phaeozem	Luvisol	Fallow	Brassica/Grass	Topsoil	Subsoil	Drought	Drought	1	ns
Podzol	Phaeozem	Legume/Grass	Fallow	Topsoil	Subsoil	Rainfall_fed	Rainfall_fed	1	ns
Phaeozem	Luvisol	Fallow	Legume/Grass	Topsoil	Subsoil	Drought	Drought	1	ns
Podzol	Podzol	Legume/Grass	Brassica/Grass	Topsoil	Subsoil	Rainfall_fed	Rainfall_fed	1	ns
Podzol	Phaeozem	Legume/Grass	Brassica/Grass	Topsoil	Subsoil	Rainfall_fed	Rainfall_fed	1	ns
Podzol	Podzol	Legume/Grass	Legume/Grass	Topsoil	Subsoil	Rainfall_fed	Drought	1	ns
Podzol	Podzol	Legume/Grass	Legume/Grass	Topsoil	Subsoil	Rainfall_fed	Rainfall_fed	1	ns
Podzol	Phaeozem	Legume/Grass	Fallow	Topsoil	Subsoil	Rainfall_fed	Drought	1	ns
Luvisol	Luvisol	Legume/Grass	Fallow	Topsoil	Topsoil	Rainfall_fed	Drought	1	ns
Podzol	Podzol	Fallow	Fallow	Topsoil	Subsoil	Rainfall_fed	Drought	1	ns
Luvisol	Phaeozem	Legume/Grass	Fallow	Topsoil	Topsoil	Rainfall_fed	Rainfall_fed	1	ns
Luvisol	Luvisol	Brassica/Grass	Fallow	Subsoil	Subsoil	Rainfall_fed	Drought	1	ns
Podzol	Podzol	Fallow	Fallow	Topsoil	Subsoil	Rainfall_fed	Rainfall_fed	1	ns
Podzol	Luvisol	Fallow	Fallow	Topsoil	Topsoil	Rainfall_fed	Drought	1	ns
Phaeozem	Luvisol	Fallow	Fallow	Topsoil	Subsoil	Drought	Drought	1	ns
Podzol	Phaeozem	Legume/Grass	Legume/Grass	Topsoil	Subsoil	Rainfall_fed	Drought	1	ns
Luvisol	Luvisol	Legume/Grass	Brassica/Grass	Subsoil	Subsoil	Rainfall_fed	Rainfall_fed	1	ns
Podzol	Phaeozem	Legume/Grass	Legume/Grass	Topsoil	Subsoil	Rainfall_fed	Rainfall_fed	1	ns
Phaeozem	Phaeozem	Legume/Grass	Fallow	Topsoil	Topsoil	Drought	Drought	1	ns
Podzol	Phaeozem	Legume/Grass	Brassica/Grass	Topsoil	Subsoil	Rainfall_fed	Drought	1	ns
Podzol	Podzol	Legume/Grass	Brassica/Grass	Topsoil	Subsoil	Rainfall_fed	Drought	1	ns
Podzol	Phaeozem	Brassica/Grass	Fallow	Topsoil	Topsoil	Rainfall_fed	Drought	1	ns
Podzol	Luvisol	Brassica/Grass	Brassica/Grass	Topsoil	Subsoil	Rainfall_fed	Rainfall_fed	1	ns
Luvisol	Podzol	Legume/Grass	Brassica/Grass	Topsoil	Topsoil	Drought	Drought	1	ns
Phaeozem	Phaeozem	Legume/Grass	Fallow	Topsoil	Topsoil	Rainfall_fed	Rainfall_fed	1	ns
Luvisol	Phaeozem	Legume/Grass	Fallow	Subsoil	Topsoil	Rainfall_fed	Drought	1	ns
Phaeozem	Luvisol	Brassica/Grass	Brassica/Grass	Subsoil	Subsoil	Drought	Drought	1	ns
Podzol	Luvisol	Brassica/Grass	Brassica/Grass	Subsoil	Subsoil	Drought	Drought	1	ns
Luvisol	Luvisol	Fallow	Brassica/Grass	Subsoil	Subsoil	Drought	Drought	1	ns
Phaeozem	Luvisol	Fallow	Brassica/Grass	Subsoil	Subsoil	Drought	Drought	1	ns
Podzol	Luvisol	Fallow	Brassica/Grass	Subsoil	Subsoil	Drought	Drought	1	ns
Luvisol	Luvisol	Legume/Grass	Brassica/Grass	Subsoil	Subsoil	Drought	Drought	1	ns
Phaeozem	Luvisol	Legume/Grass	Brassica/Grass	Subsoil	Subsoil	Drought	Drought	1	ns
Podzol	Luvisol	Legume/Grass	Brassica/Grass	Subsoil	Subsoil	Drought	Drought	1	ns
Podzol	Luvisol	Fallow	Brassica/Grass	Topsoil	Subsoil	Drought	Drought	1	ns
Luvisol	Luvisol	Legume/Grass	Brassica/Grass	Topsoil	Subsoil	Drought	Drought	1	ns
Podzol	Luvisol	Legume/Grass	Brassica/Grass	Topsoil	Subsoil	Drought	Drought	1	ns
Phaeozem	Luvisol	Brassica/Grass	Brassica/Grass	Subsoil	Subsoil	Rainfall_fed	Drought	1	ns
Podzol	Luvisol	Brassica/Grass	Brassica/Grass	Subsoil	Subsoil	Rainfall_fed	Drought	1	ns
Luvisol	Luvisol	Fallow	Brassica/Grass	Subsoil	Subsoil	Rainfall_fed	Drought	1	ns
Phaeozem	Luvisol	Fallow	Brassica/Grass	Subsoil	Subsoil	Rainfall_fed	Drought	1	ns
Podzol	Luvisol	Fallow	Brassica/Grass	Subsoil	Subsoil	Rainfall_fed	Drought	1	ns
Luvisol	Luvisol	Legume/Grass	Brassica/Grass	Subsoil	Subsoil	Rainfall_fed	Drought	1	ns
Phaeozem	Luvisol	Legume/Grass	Brassica/Grass	Subsoil	Subsoil	Rainfall_fed	Drought	1	ns
Podzol	Luvisol	Legume/Grass	Brassica/Grass	Subsoil	Subsoil	Rainfall_fed	Drought	1	ns
Luvisol	Luvisol	Brassica/Grass	Brassica/Grass	Topsoil	Subsoil	Rainfall_fed	Drought	1	ns
Podzol	Luvisol	Brassica/Grass	Brassica/Grass	Topsoil	Subsoil	Rainfall_fed	Drought	1	ns
Podzol	Luvisol	Legume/Grass	Brassica/Grass	Topsoil	Subsoil	Rainfall_fed	Drought	1	ns
Podzol	Phaeozem	Brassica/Grass	Brassica/Grass	Subsoil	Subsoil	Drought	Drought	1	ns
Luvisol	Phaeozem	Fallow	Brassica/Grass	Subsoil	Subsoil	Drought	Drought	1	ns
Phaeozem	Phaeozem	Fallow	Brassica/Grass	Subsoil	Subsoil	Drought	Drought	1	ns
Podzol	Phaeozem	Fallow	Brassica/Grass	Subsoil	Subsoil	Drought	Drought	1	ns
Luvisol	Phaeozem	Legume/Grass	Brassica/Grass	Subsoil	Subsoil	Drought	Drought	1	ns
Phaeozem	Phaeozem	Legume/Grass	Brassica/Grass	Subsoil	Subsoil	Drought	Drought	1	ns
Podzol	Phaeozem	Legume/Grass	Brassica/Grass	Subsoil	Subsoil	Drought	Drought	1	ns
Podzol	Phaeozem	Fallow	Brassica/Grass	Topsoil	Subsoil	Drought	Drought	1	ns
Luvisol	Phaeozem	Legume/Grass	Brassica/Grass	Topsoil	Subsoil	Drought	Drought	1	ns
Podzol	Phaeozem	Legume/Grass	Brassica/Grass	Topsoil	Subsoil	Drought	Drought	1	ns
Phaeozem	Phaeozem	Brassica/Grass	Brassica/Grass	Subsoil	Subsoil	Rainfall_fed	Drought	1	ns
Podzol	Phaeozem	Brassica/Grass	Brassica/Grass	Subsoil	Subsoil	Rainfall_fed	Drought	1	ns
Luvisol	Phaeozem	Fallow	Brassica/Grass	Subsoil	Subsoil	Rainfall_fed	Drought	1	ns
Phaeozem	Phaeozem	Fallow	Brassica/Grass	Subsoil	Subsoil	Rainfall_fed	Drought	1	ns
Podzol	Phaeozem	Fallow	Brassica/Grass	Subsoil	Subsoil	Rainfall_fed	Drought	1	ns
Luvisol	Phaeozem	Legume/Grass	Brassica/Grass	Subsoil	Subsoil	Rainfall_fed	Drought	1	ns
Phaeozem	Phaeozem	Legume/Grass	Brassica/Grass	Subsoil	Subsoil	Rainfall_fed	Drought	1	ns
Podzol	Phaeozem	Legume/Grass	Brassica/Grass	Subsoil	Subsoil	Rainfall_fed	Drought	1	ns
Luvisol	Phaeozem	Brassica/Grass	Brassica/Grass	Topsoil	Subsoil	Rainfall_fed	Drought	1	ns
Podzol	Phaeozem	Brassica/Grass	Brassica/Grass	Topsoil	Subsoil	Rainfall_fed	Drought	1	ns
Luvisol	Podzol	Fallow	Brassica/Grass	Subsoil	Subsoil	Drought	Drought	1	ns
Phaeozem	Podzol	Fallow	Brassica/Grass	Subsoil	Subsoil	Drought	Drought	1	ns
Podzol	Podzol	Fallow	Brassica/Grass	Subsoil	Subsoil	Drought	Drought	1	ns
Luvisol	Podzol	Legume/Grass	Brassica/Grass	Subsoil	Subsoil	Drought	Drought	1	ns
Phaeozem	Podzol	Legume/Grass	Brassica/Grass	Subsoil	Subsoil	Drought	Drought	1	ns
Podzol	Podzol	Legume/Grass	Brassica/Grass	Subsoil	Subsoil	Drought	Drought	1	ns
Podzol	Podzol	Fallow	Brassica/Grass	Topsoil	Subsoil	Drought	Drought	1	ns
Luvisol	Podzol	Legume/Grass	Brassica/Grass	Topsoil	Subsoil	Drought	Drought	1	ns
Podzol	Podzol	Legume/Grass	Brassica/Grass	Topsoil	Subsoil	Drought	Drought	1	ns
Phaeozem	Podzol	Brassica/Grass	Brassica/Grass	Subsoil	Subsoil	Rainfall_fed	Drought	1	ns
Podzol	Podzol	Brassica/Grass	Brassica/Grass	Subsoil	Subsoil	Rainfall_fed	Drought	1	ns
Luvisol	Podzol	Fallow	Brassica/Grass	Subsoil	Subsoil	Rainfall_fed	Drought	1	ns
Phaeozem	Podzol	Fallow	Brassica/Grass	Subsoil	Subsoil	Rainfall_fed	Drought	1	ns
Podzol	Podzol	Fallow	Brassica/Grass	Subsoil	Subsoil	Rainfall_fed	Drought	1	ns
Luvisol	Podzol	Legume/Grass	Brassica/Grass	Subsoil	Subsoil	Rainfall_fed	Drought	1	ns
Phaeozem	Podzol	Legume/Grass	Brassica/Grass	Subsoil	Subsoil	Rainfall_fed	Drought	1	ns
Podzol	Podzol	Legume/Grass	Brassica/Grass	Subsoil	Subsoil	Rainfall_fed	Drought	1	ns
Luvisol	Podzol	Brassica/Grass	Brassica/Grass	Topsoil	Subsoil	Rainfall_fed	Drought	1	ns
Podzol	Podzol	Brassica/Grass	Brassica/Grass	Topsoil	Subsoil	Rainfall_fed	Drought	1	ns
Phaeozem	Luvisol	Fallow	Fallow	Subsoil	Subsoil	Drought	Drought	1	ns
Podzol	Luvisol	Fallow	Fallow	Subsoil	Subsoil	Drought	Drought	1	ns
Luvisol	Luvisol	Legume/Grass	Fallow	Subsoil	Subsoil	Drought	Drought	1	ns
Phaeozem	Luvisol	Legume/Grass	Fallow	Subsoil	Subsoil	Drought	Drought	1	ns
Podzol	Luvisol	Legume/Grass	Fallow	Subsoil	Subsoil	Drought	Drought	1	ns
Podzol	Luvisol	Fallow	Fallow	Topsoil	Subsoil	Drought	Drought	1	ns
Luvisol	Luvisol	Legume/Grass	Fallow	Topsoil	Subsoil	Drought	Drought	1	ns
Podzol	Luvisol	Legume/Grass	Fallow	Topsoil	Subsoil	Drought	Drought	1	ns
Phaeozem	Luvisol	Brassica/Grass	Fallow	Subsoil	Subsoil	Rainfall_fed	Drought	1	ns
Podzol	Luvisol	Brassica/Grass	Fallow	Subsoil	Subsoil	Rainfall_fed	Drought	1	ns
Luvisol	Luvisol	Fallow	Fallow	Subsoil	Subsoil	Rainfall_fed	Drought	1	ns
Phaeozem	Luvisol	Fallow	Fallow	Subsoil	Subsoil	Rainfall_fed	Drought	1	ns
Podzol	Luvisol	Fallow	Fallow	Subsoil	Subsoil	Rainfall_fed	Drought	1	ns
Luvisol	Luvisol	Legume/Grass	Fallow	Subsoil	Subsoil	Rainfall_fed	Drought	1	ns
Phaeozem	Luvisol	Legume/Grass	Fallow	Subsoil	Subsoil	Rainfall_fed	Drought	1	ns
Podzol	Luvisol	Legume/Grass	Fallow	Subsoil	Subsoil	Rainfall_fed	Drought	1	ns
Luvisol	Luvisol	Brassica/Grass	Fallow	Topsoil	Subsoil	Rainfall_fed	Drought	1	ns
Podzol	Luvisol	Brassica/Grass	Fallow	Topsoil	Subsoil	Rainfall_fed	Drought	1	ns
Podzol	Luvisol	Legume/Grass	Fallow	Topsoil	Subsoil	Rainfall_fed	Drought	1	ns
Podzol	Phaeozem	Fallow	Fallow	Subsoil	Subsoil	Drought	Drought	1	ns
Luvisol	Phaeozem	Legume/Grass	Fallow	Subsoil	Subsoil	Drought	Drought	1	ns
Phaeozem	Phaeozem	Legume/Grass	Fallow	Subsoil	Subsoil	Drought	Drought	1	ns
Podzol	Phaeozem	Legume/Grass	Fallow	Subsoil	Subsoil	Drought	Drought	1	ns
Podzol	Phaeozem	Fallow	Fallow	Topsoil	Subsoil	Drought	Drought	1	ns
Luvisol	Phaeozem	Legume/Grass	Fallow	Topsoil	Subsoil	Drought	Drought	1	ns
Podzol	Phaeozem	Legume/Grass	Fallow	Topsoil	Subsoil	Drought	Drought	1	ns
Phaeozem	Phaeozem	Brassica/Grass	Fallow	Subsoil	Subsoil	Rainfall_fed	Drought	1	ns
Podzol	Phaeozem	Brassica/Grass	Fallow	Subsoil	Subsoil	Rainfall_fed	Drought	1	ns
Luvisol	Phaeozem	Fallow	Fallow	Subsoil	Subsoil	Rainfall_fed	Drought	1	ns
Phaeozem	Phaeozem	Fallow	Fallow	Subsoil	Subsoil	Rainfall_fed	Drought	1	ns
Podzol	Phaeozem	Fallow	Fallow	Subsoil	Subsoil	Rainfall_fed	Drought	1	ns
Luvisol	Phaeozem	Legume/Grass	Fallow	Subsoil	Subsoil	Rainfall_fed	Drought	1	ns
Phaeozem	Phaeozem	Legume/Grass	Fallow	Subsoil	Subsoil	Rainfall_fed	Drought	1	ns
Podzol	Phaeozem	Legume/Grass	Fallow	Subsoil	Subsoil	Rainfall_fed	Drought	1	ns
Luvisol	Phaeozem	Brassica/Grass	Fallow	Topsoil	Subsoil	Rainfall_fed	Drought	1	ns
Podzol	Phaeozem	Brassica/Grass	Fallow	Topsoil	Subsoil	Rainfall_fed	Drought	1	ns
Luvisol	Podzol	Legume/Grass	Fallow	Subsoil	Subsoil	Drought	Drought	1	ns
Phaeozem	Podzol	Legume/Grass	Fallow	Subsoil	Subsoil	Drought	Drought	1	ns
Podzol	Podzol	Legume/Grass	Fallow	Subsoil	Subsoil	Drought	Drought	1	ns
Phaeozem	Podzol	Fallow	Fallow	Topsoil	Subsoil	Drought	Drought	1	ns
Podzol	Podzol	Fallow	Fallow	Topsoil	Subsoil	Drought	Drought	1	ns
Luvisol	Podzol	Legume/Grass	Fallow	Topsoil	Subsoil	Drought	Drought	1	ns
Podzol	Podzol	Legume/Grass	Fallow	Topsoil	Subsoil	Drought	Drought	1	ns
Luvisol	Podzol	Brassica/Grass	Fallow	Subsoil	Subsoil	Rainfall_fed	Drought	1	ns
Phaeozem	Podzol	Brassica/Grass	Fallow	Subsoil	Subsoil	Rainfall_fed	Drought	1	ns
Podzol	Podzol	Brassica/Grass	Fallow	Subsoil	Subsoil	Rainfall_fed	Drought	1	ns
Luvisol	Podzol	Fallow	Fallow	Subsoil	Subsoil	Rainfall_fed	Drought	1	ns
Phaeozem	Podzol	Fallow	Fallow	Subsoil	Subsoil	Rainfall_fed	Drought	1	ns
Podzol	Podzol	Fallow	Fallow	Subsoil	Subsoil	Rainfall_fed	Drought	1	ns
Luvisol	Podzol	Legume/Grass	Fallow	Subsoil	Subsoil	Rainfall_fed	Drought	1	ns
Phaeozem	Podzol	Legume/Grass	Fallow	Subsoil	Subsoil	Rainfall_fed	Drought	1	ns
Podzol	Podzol	Legume/Grass	Fallow	Subsoil	Subsoil	Rainfall_fed	Drought	1	ns
Luvisol	Podzol	Brassica/Grass	Fallow	Topsoil	Subsoil	Rainfall_fed	Drought	1	ns
Podzol	Podzol	Brassica/Grass	Fallow	Topsoil	Subsoil	Rainfall_fed	Drought	1	ns
Luvisol	Podzol	Fallow	Fallow	Topsoil	Subsoil	Rainfall_fed	Drought	1	ns
Podzol	Podzol	Legume/Grass	Fallow	Topsoil	Subsoil	Rainfall_fed	Drought	1	ns
Phaeozem	Luvisol	Legume/Grass	Legume/Grass	Subsoil	Subsoil	Drought	Drought	1	ns
Podzol	Luvisol	Legume/Grass	Legume/Grass	Subsoil	Subsoil	Drought	Drought	1	ns
Podzol	Luvisol	Fallow	Legume/Grass	Topsoil	Subsoil	Drought	Drought	1	ns
Luvisol	Luvisol	Legume/Grass	Legume/Grass	Topsoil	Subsoil	Drought	Drought	1	ns
Podzol	Luvisol	Legume/Grass	Legume/Grass	Topsoil	Subsoil	Drought	Drought	1	ns
Phaeozem	Luvisol	Brassica/Grass	Legume/Grass	Subsoil	Subsoil	Rainfall_fed	Drought	1	ns
Podzol	Luvisol	Brassica/Grass	Legume/Grass	Subsoil	Subsoil	Rainfall_fed	Drought	1	ns
Luvisol	Luvisol	Fallow	Legume/Grass	Subsoil	Subsoil	Rainfall_fed	Drought	1	ns
Phaeozem	Luvisol	Fallow	Legume/Grass	Subsoil	Subsoil	Rainfall_fed	Drought	1	ns
Podzol	Luvisol	Fallow	Legume/Grass	Subsoil	Subsoil	Rainfall_fed	Drought	1	ns
Luvisol	Luvisol	Legume/Grass	Legume/Grass	Subsoil	Subsoil	Rainfall_fed	Drought	1	ns
Phaeozem	Luvisol	Legume/Grass	Legume/Grass	Subsoil	Subsoil	Rainfall_fed	Drought	1	ns
Podzol	Luvisol	Legume/Grass	Legume/Grass	Subsoil	Subsoil	Rainfall_fed	Drought	1	ns
Luvisol	Luvisol	Brassica/Grass	Legume/Grass	Topsoil	Subsoil	Rainfall_fed	Drought	1	ns
Podzol	Luvisol	Brassica/Grass	Legume/Grass	Topsoil	Subsoil	Rainfall_fed	Drought	1	ns
Podzol	Luvisol	Legume/Grass	Legume/Grass	Topsoil	Subsoil	Rainfall_fed	Drought	1	ns
Podzol	Phaeozem	Legume/Grass	Legume/Grass	Subsoil	Subsoil	Drought	Drought	1	ns
Podzol	Phaeozem	Fallow	Legume/Grass	Topsoil	Subsoil	Drought	Drought	1	ns
Luvisol	Phaeozem	Legume/Grass	Legume/Grass	Topsoil	Subsoil	Drought	Drought	1	ns
Podzol	Phaeozem	Legume/Grass	Legume/Grass	Topsoil	Subsoil	Drought	Drought	1	ns
Phaeozem	Phaeozem	Brassica/Grass	Legume/Grass	Subsoil	Subsoil	Rainfall_fed	Drought	1	ns
Podzol	Phaeozem	Brassica/Grass	Legume/Grass	Subsoil	Subsoil	Rainfall_fed	Drought	1	ns
Luvisol	Phaeozem	Fallow	Legume/Grass	Subsoil	Subsoil	Rainfall_fed	Drought	1	ns
Phaeozem	Phaeozem	Fallow	Legume/Grass	Subsoil	Subsoil	Rainfall_fed	Drought	1	ns
Podzol	Phaeozem	Fallow	Legume/Grass	Subsoil	Subsoil	Rainfall_fed	Drought	1	ns
Luvisol	Phaeozem	Legume/Grass	Legume/Grass	Subsoil	Subsoil	Rainfall_fed	Drought	1	ns
Phaeozem	Phaeozem	Legume/Grass	Legume/Grass	Subsoil	Subsoil	Rainfall_fed	Drought	1	ns
Podzol	Phaeozem	Legume/Grass	Legume/Grass	Subsoil	Subsoil	Rainfall_fed	Drought	1	ns
Luvisol	Phaeozem	Brassica/Grass	Legume/Grass	Topsoil	Subsoil	Rainfall_fed	Drought	1	ns
Podzol	Phaeozem	Brassica/Grass	Legume/Grass	Topsoil	Subsoil	Rainfall_fed	Drought	1	ns
Podzol	Podzol	Fallow	Legume/Grass	Topsoil	Subsoil	Drought	Drought	1	ns
Luvisol	Podzol	Legume/Grass	Legume/Grass	Topsoil	Subsoil	Drought	Drought	1	ns
Podzol	Podzol	Legume/Grass	Legume/Grass	Topsoil	Subsoil	Drought	Drought	1	ns
Phaeozem	Podzol	Brassica/Grass	Legume/Grass	Subsoil	Subsoil	Rainfall_fed	Drought	1	ns
Podzol	Podzol	Brassica/Grass	Legume/Grass	Subsoil	Subsoil	Rainfall_fed	Drought	1	ns
Luvisol	Podzol	Fallow	Legume/Grass	Subsoil	Subsoil	Rainfall_fed	Drought	1	ns
Phaeozem	Podzol	Fallow	Legume/Grass	Subsoil	Subsoil	Rainfall_fed	Drought	1	ns
Podzol	Podzol	Fallow	Legume/Grass	Subsoil	Subsoil	Rainfall_fed	Drought	1	ns
Luvisol	Podzol	Legume/Grass	Legume/Grass	Subsoil	Subsoil	Rainfall_fed	Drought	1	ns
Phaeozem	Podzol	Legume/Grass	Legume/Grass	Subsoil	Subsoil	Rainfall_fed	Drought	1	ns
Podzol	Podzol	Legume/Grass	Legume/Grass	Subsoil	Subsoil	Rainfall_fed	Drought	1	ns
Luvisol	Podzol	Brassica/Grass	Legume/Grass	Topsoil	Subsoil	Rainfall_fed	Drought	1	ns
Podzol	Podzol	Brassica/Grass	Legume/Grass	Topsoil	Subsoil	Rainfall_fed	Drought	1	ns
Podzol	Luvisol	Brassica/Grass	Brassica/Grass	Topsoil	Topsoil	Drought	Drought	1	ns
Luvisol	Luvisol	Fallow	Brassica/Grass	Topsoil	Topsoil	Drought	Drought	1	ns
Phaeozem	Luvisol	Fallow	Brassica/Grass	Topsoil	Topsoil	Drought	Drought	1	ns
Luvisol	Luvisol	Legume/Grass	Brassica/Grass	Topsoil	Topsoil	Drought	Drought	1	ns
Phaeozem	Luvisol	Legume/Grass	Brassica/Grass	Topsoil	Topsoil	Drought	Drought	1	ns
Podzol	Luvisol	Legume/Grass	Brassica/Grass	Topsoil	Topsoil	Drought	Drought	1	ns
Luvisol	Luvisol	Brassica/Grass	Brassica/Grass	Subsoil	Topsoil	Rainfall_fed	Drought	1	ns
Luvisol	Luvisol	Fallow	Brassica/Grass	Topsoil	Topsoil	Rainfall_fed	Drought	1	ns
Podzol	Luvisol	Fallow	Brassica/Grass	Topsoil	Topsoil	Rainfall_fed	Drought	1	ns
Podzol	Luvisol	Legume/Grass	Brassica/Grass	Topsoil	Topsoil	Rainfall_fed	Drought	1	ns
Phaeozem	Phaeozem	Brassica/Grass	Brassica/Grass	Topsoil	Topsoil	Rainfall_fed	Drought	1	ns
Phaeozem	Phaeozem	Fallow	Brassica/Grass	Topsoil	Topsoil	Rainfall_fed	Drought	1	ns
Luvisol	Phaeozem	Legume/Grass	Brassica/Grass	Topsoil	Topsoil	Rainfall_fed	Drought	1	ns
Luvisol	Podzol	Fallow	Brassica/Grass	Topsoil	Topsoil	Drought	Drought	1	ns
Phaeozem	Podzol	Fallow	Brassica/Grass	Topsoil	Topsoil	Drought	Drought	1	ns
Phaeozem	Podzol	Legume/Grass	Brassica/Grass	Topsoil	Topsoil	Drought	Drought	1	ns
Podzol	Podzol	Legume/Grass	Brassica/Grass	Topsoil	Topsoil	Drought	Drought	1	ns
Luvisol	Podzol	Brassica/Grass	Brassica/Grass	Subsoil	Topsoil	Rainfall_fed	Drought	1	ns
Luvisol	Podzol	Fallow	Brassica/Grass	Topsoil	Topsoil	Rainfall_fed	Drought	1	ns
Podzol	Podzol	Fallow	Brassica/Grass	Topsoil	Topsoil	Rainfall_fed	Drought	1	ns
Podzol	Podzol	Legume/Grass	Brassica/Grass	Topsoil	Topsoil	Rainfall_fed	Drought	1	ns
Phaeozem	Luvisol	Legume/Grass	Fallow	Topsoil	Topsoil	Drought	Drought	1	ns
Podzol	Phaeozem	Fallow	Fallow	Topsoil	Topsoil	Drought	Drought	1	ns
Luvisol	Phaeozem	Legume/Grass	Fallow	Topsoil	Topsoil	Drought	Drought	1	ns
Podzol	Phaeozem	Legume/Grass	Fallow	Topsoil	Topsoil	Drought	Drought	1	ns
Luvisol	Phaeozem	Brassica/Grass	Fallow	Subsoil	Topsoil	Rainfall_fed	Drought	1	ns
Luvisol	Phaeozem	Fallow	Fallow	Subsoil	Topsoil	Rainfall_fed	Drought	1	ns
Podzol	Phaeozem	Fallow	Fallow	Subsoil	Topsoil	Rainfall_fed	Drought	1	ns
Luvisol	Phaeozem	Brassica/Grass	Fallow	Topsoil	Topsoil	Rainfall_fed	Drought	1	ns
Luvisol	Phaeozem	Fallow	Fallow	Topsoil	Topsoil	Rainfall_fed	Drought	1	ns
Podzol	Phaeozem	Fallow	Fallow	Topsoil	Topsoil	Rainfall_fed	Drought	1	ns
Podzol	Phaeozem	Legume/Grass	Fallow	Topsoil	Topsoil	Rainfall_fed	Drought	1	ns
Luvisol	Podzol	Legume/Grass	Fallow	Topsoil	Topsoil	Drought	Drought	1	ns
Podzol	Podzol	Legume/Grass	Fallow	Topsoil	Topsoil	Drought	Drought	1	ns
Luvisol	Podzol	Brassica/Grass	Fallow	Subsoil	Topsoil	Rainfall_fed	Drought	1	ns
Phaeozem	Podzol	Brassica/Grass	Fallow	Subsoil	Topsoil	Rainfall_fed	Drought	1	ns
Podzol	Podzol	Brassica/Grass	Fallow	Subsoil	Topsoil	Rainfall_fed	Drought	1	ns
Luvisol	Podzol	Fallow	Fallow	Subsoil	Topsoil	Rainfall_fed	Drought	1	ns
Phaeozem	Podzol	Fallow	Fallow	Subsoil	Topsoil	Rainfall_fed	Drought	1	ns
Podzol	Podzol	Fallow	Fallow	Subsoil	Topsoil	Rainfall_fed	Drought	1	ns
Luvisol	Podzol	Legume/Grass	Fallow	Subsoil	Topsoil	Rainfall_fed	Drought	1	ns
Phaeozem	Podzol	Legume/Grass	Fallow	Subsoil	Topsoil	Rainfall_fed	Drought	1	ns
Podzol	Podzol	Legume/Grass	Fallow	Subsoil	Topsoil	Rainfall_fed	Drought	1	ns
Luvisol	Podzol	Brassica/Grass	Fallow	Topsoil	Topsoil	Rainfall_fed	Drought	1	ns
Podzol	Podzol	Brassica/Grass	Fallow	Topsoil	Topsoil	Rainfall_fed	Drought	1	ns
Luvisol	Podzol	Fallow	Fallow	Topsoil	Topsoil	Rainfall_fed	Drought	1	ns
Podzol	Podzol	Fallow	Fallow	Topsoil	Topsoil	Rainfall_fed	Drought	1	ns
Podzol	Podzol	Legume/Grass	Fallow	Topsoil	Topsoil	Rainfall_fed	Drought	1	ns
Podzol	Luvisol	Legume/Grass	Legume/Grass	Topsoil	Topsoil	Drought	Drought	1	ns
Luvisol	Luvisol	Brassica/Grass	Legume/Grass	Subsoil	Topsoil	Rainfall_fed	Drought	1	ns
Phaeozem	Luvisol	Brassica/Grass	Legume/Grass	Subsoil	Topsoil	Rainfall_fed	Drought	1	ns
Podzol	Luvisol	Brassica/Grass	Legume/Grass	Subsoil	Topsoil	Rainfall_fed	Drought	1	ns
Luvisol	Luvisol	Fallow	Legume/Grass	Subsoil	Topsoil	Rainfall_fed	Drought	1	ns
Phaeozem	Luvisol	Fallow	Legume/Grass	Subsoil	Topsoil	Rainfall_fed	Drought	1	ns
Podzol	Luvisol	Fallow	Legume/Grass	Subsoil	Topsoil	Rainfall_fed	Drought	1	ns
Luvisol	Luvisol	Legume/Grass	Legume/Grass	Subsoil	Topsoil	Rainfall_fed	Drought	1	ns
Phaeozem	Luvisol	Legume/Grass	Legume/Grass	Subsoil	Topsoil	Rainfall_fed	Drought	1	ns
Podzol	Luvisol	Legume/Grass	Legume/Grass	Subsoil	Topsoil	Rainfall_fed	Drought	1	ns
Luvisol	Luvisol	Brassica/Grass	Legume/Grass	Topsoil	Topsoil	Rainfall_fed	Drought	1	ns
Podzol	Luvisol	Brassica/Grass	Legume/Grass	Topsoil	Topsoil	Rainfall_fed	Drought	1	ns
Luvisol	Luvisol	Fallow	Legume/Grass	Topsoil	Topsoil	Rainfall_fed	Drought	1	ns
Podzol	Luvisol	Fallow	Legume/Grass	Topsoil	Topsoil	Rainfall_fed	Drought	1	ns
Podzol	Luvisol	Legume/Grass	Legume/Grass	Topsoil	Topsoil	Rainfall_fed	Drought	1	ns
Luvisol	Phaeozem	Fallow	Legume/Grass	Topsoil	Topsoil	Rainfall_fed	Drought	1	ns
Podzol	Phaeozem	Fallow	Legume/Grass	Topsoil	Topsoil	Rainfall_fed	Drought	1	ns
Luvisol	Podzol	Brassica/Grass	Legume/Grass	Subsoil	Topsoil	Rainfall_fed	Drought	1	ns
Phaeozem	Podzol	Brassica/Grass	Legume/Grass	Subsoil	Topsoil	Rainfall_fed	Drought	1	ns
Podzol	Podzol	Brassica/Grass	Legume/Grass	Subsoil	Topsoil	Rainfall_fed	Drought	1	ns
Luvisol	Podzol	Fallow	Legume/Grass	Subsoil	Topsoil	Rainfall_fed	Drought	1	ns
Phaeozem	Podzol	Fallow	Legume/Grass	Subsoil	Topsoil	Rainfall_fed	Drought	1	ns
Podzol	Podzol	Fallow	Legume/Grass	Subsoil	Topsoil	Rainfall_fed	Drought	1	ns
Luvisol	Podzol	Legume/Grass	Legume/Grass	Subsoil	Topsoil	Rainfall_fed	Drought	1	ns
Phaeozem	Podzol	Legume/Grass	Legume/Grass	Subsoil	Topsoil	Rainfall_fed	Drought	1	ns
Podzol	Podzol	Legume/Grass	Legume/Grass	Subsoil	Topsoil	Rainfall_fed	Drought	1	ns
Luvisol	Podzol	Brassica/Grass	Legume/Grass	Topsoil	Topsoil	Rainfall_fed	Drought	1	ns
Podzol	Podzol	Brassica/Grass	Legume/Grass	Topsoil	Topsoil	Rainfall_fed	Drought	1	ns
Luvisol	Podzol	Fallow	Legume/Grass	Topsoil	Topsoil	Rainfall_fed	Drought	1	ns
Podzol	Podzol	Fallow	Legume/Grass	Topsoil	Topsoil	Rainfall_fed	Drought	1	ns
Podzol	Podzol	Legume/Grass	Legume/Grass	Topsoil	Topsoil	Rainfall_fed	Drought	1	ns
Luvisol	Luvisol	Fallow	Brassica/Grass	Subsoil	Subsoil	Rainfall_fed	Rainfall_fed	1	ns
Podzol	Luvisol	Fallow	Brassica/Grass	Subsoil	Subsoil	Rainfall_fed	Rainfall_fed	1	ns
Luvisol	Luvisol	Brassica/Grass	Brassica/Grass	Topsoil	Subsoil	Rainfall_fed	Rainfall_fed	1	ns
Luvisol	Luvisol	Fallow	Brassica/Grass	Topsoil	Subsoil	Rainfall_fed	Rainfall_fed	1	ns
Podzol	Luvisol	Fallow	Brassica/Grass	Topsoil	Subsoil	Rainfall_fed	Rainfall_fed	1	ns
Podzol	Luvisol	Legume/Grass	Brassica/Grass	Topsoil	Subsoil	Rainfall_fed	Rainfall_fed	1	ns
Podzol	Phaeozem	Brassica/Grass	Brassica/Grass	Subsoil	Subsoil	Rainfall_fed	Rainfall_fed	1	ns
Luvisol	Phaeozem	Fallow	Brassica/Grass	Subsoil	Subsoil	Rainfall_fed	Rainfall_fed	1	ns
Phaeozem	Phaeozem	Fallow	Brassica/Grass	Subsoil	Subsoil	Rainfall_fed	Rainfall_fed	1	ns
Podzol	Phaeozem	Fallow	Brassica/Grass	Subsoil	Subsoil	Rainfall_fed	Rainfall_fed	1	ns
Luvisol	Phaeozem	Legume/Grass	Brassica/Grass	Subsoil	Subsoil	Rainfall_fed	Rainfall_fed	1	ns
Phaeozem	Phaeozem	Legume/Grass	Brassica/Grass	Subsoil	Subsoil	Rainfall_fed	Rainfall_fed	1	ns
Podzol	Phaeozem	Legume/Grass	Brassica/Grass	Subsoil	Subsoil	Rainfall_fed	Rainfall_fed	1	ns
Luvisol	Phaeozem	Brassica/Grass	Brassica/Grass	Topsoil	Subsoil	Rainfall_fed	Rainfall_fed	1	ns
Podzol	Phaeozem	Brassica/Grass	Brassica/Grass	Topsoil	Subsoil	Rainfall_fed	Rainfall_fed	1	ns
Luvisol	Podzol	Fallow	Brassica/Grass	Subsoil	Subsoil	Rainfall_fed	Rainfall_fed	1	ns
Phaeozem	Podzol	Fallow	Brassica/Grass	Subsoil	Subsoil	Rainfall_fed	Rainfall_fed	1	ns
Podzol	Podzol	Fallow	Brassica/Grass	Subsoil	Subsoil	Rainfall_fed	Rainfall_fed	1	ns
Luvisol	Podzol	Legume/Grass	Brassica/Grass	Subsoil	Subsoil	Rainfall_fed	Rainfall_fed	1	ns
Phaeozem	Podzol	Legume/Grass	Brassica/Grass	Subsoil	Subsoil	Rainfall_fed	Rainfall_fed	1	ns
Podzol	Podzol	Legume/Grass	Brassica/Grass	Subsoil	Subsoil	Rainfall_fed	Rainfall_fed	1	ns
Luvisol	Podzol	Brassica/Grass	Brassica/Grass	Topsoil	Subsoil	Rainfall_fed	Rainfall_fed	1	ns
Podzol	Podzol	Brassica/Grass	Brassica/Grass	Topsoil	Subsoil	Rainfall_fed	Rainfall_fed	1	ns
Phaeozem	Luvisol	Fallow	Fallow	Subsoil	Subsoil	Rainfall_fed	Rainfall_fed	1	ns
Podzol	Luvisol	Fallow	Fallow	Subsoil	Subsoil	Rainfall_fed	Rainfall_fed	1	ns
Luvisol	Luvisol	Legume/Grass	Fallow	Subsoil	Subsoil	Rainfall_fed	Rainfall_fed	1	ns
Phaeozem	Luvisol	Legume/Grass	Fallow	Subsoil	Subsoil	Rainfall_fed	Rainfall_fed	1	ns
Podzol	Luvisol	Legume/Grass	Fallow	Subsoil	Subsoil	Rainfall_fed	Rainfall_fed	1	ns
Luvisol	Luvisol	Brassica/Grass	Fallow	Topsoil	Subsoil	Rainfall_fed	Rainfall_fed	1	ns
Podzol	Luvisol	Brassica/Grass	Fallow	Topsoil	Subsoil	Rainfall_fed	Rainfall_fed	1	ns
Luvisol	Luvisol	Fallow	Fallow	Topsoil	Subsoil	Rainfall_fed	Rainfall_fed	1	ns
Podzol	Luvisol	Fallow	Fallow	Topsoil	Subsoil	Rainfall_fed	Rainfall_fed	1	ns
Podzol	Luvisol	Legume/Grass	Fallow	Topsoil	Subsoil	Rainfall_fed	Rainfall_fed	1	ns
Podzol	Phaeozem	Fallow	Fallow	Subsoil	Subsoil	Rainfall_fed	Rainfall_fed	1	ns
Luvisol	Phaeozem	Legume/Grass	Fallow	Subsoil	Subsoil	Rainfall_fed	Rainfall_fed	1	ns
Phaeozem	Phaeozem	Legume/Grass	Fallow	Subsoil	Subsoil	Rainfall_fed	Rainfall_fed	1	ns
Podzol	Phaeozem	Legume/Grass	Fallow	Subsoil	Subsoil	Rainfall_fed	Rainfall_fed	1	ns
Luvisol	Phaeozem	Brassica/Grass	Fallow	Topsoil	Subsoil	Rainfall_fed	Rainfall_fed	1	ns
Podzol	Phaeozem	Brassica/Grass	Fallow	Topsoil	Subsoil	Rainfall_fed	Rainfall_fed	1	ns
Luvisol	Podzol	Legume/Grass	Fallow	Subsoil	Subsoil	Rainfall_fed	Rainfall_fed	1	ns
Phaeozem	Podzol	Legume/Grass	Fallow	Subsoil	Subsoil	Rainfall_fed	Rainfall_fed	1	ns
Podzol	Podzol	Legume/Grass	Fallow	Subsoil	Subsoil	Rainfall_fed	Rainfall_fed	1	ns
Luvisol	Podzol	Brassica/Grass	Fallow	Topsoil	Subsoil	Rainfall_fed	Rainfall_fed	1	ns
Podzol	Podzol	Brassica/Grass	Fallow	Topsoil	Subsoil	Rainfall_fed	Rainfall_fed	1	ns
Luvisol	Podzol	Fallow	Fallow	Topsoil	Subsoil	Rainfall_fed	Rainfall_fed	1	ns
Podzol	Podzol	Legume/Grass	Fallow	Topsoil	Subsoil	Rainfall_fed	Rainfall_fed	1	ns
Phaeozem	Luvisol	Legume/Grass	Legume/Grass	Subsoil	Subsoil	Rainfall_fed	Rainfall_fed	1	ns
Podzol	Luvisol	Legume/Grass	Legume/Grass	Subsoil	Subsoil	Rainfall_fed	Rainfall_fed	1	ns
Luvisol	Luvisol	Brassica/Grass	Legume/Grass	Topsoil	Subsoil	Rainfall_fed	Rainfall_fed	1	ns
Podzol	Luvisol	Brassica/Grass	Legume/Grass	Topsoil	Subsoil	Rainfall_fed	Rainfall_fed	1	ns
Podzol	Luvisol	Legume/Grass	Legume/Grass	Topsoil	Subsoil	Rainfall_fed	Rainfall_fed	1	ns
Podzol	Phaeozem	Legume/Grass	Legume/Grass	Subsoil	Subsoil	Rainfall_fed	Rainfall_fed	1	ns
Luvisol	Phaeozem	Brassica/Grass	Legume/Grass	Topsoil	Subsoil	Rainfall_fed	Rainfall_fed	1	ns
Podzol	Phaeozem	Brassica/Grass	Legume/Grass	Topsoil	Subsoil	Rainfall_fed	Rainfall_fed	1	ns
Luvisol	Podzol	Brassica/Grass	Legume/Grass	Topsoil	Subsoil	Rainfall_fed	Rainfall_fed	1	ns
Podzol	Podzol	Brassica/Grass	Legume/Grass	Topsoil	Subsoil	Rainfall_fed	Rainfall_fed	1	ns
Podzol	Luvisol	Brassica/Grass	Brassica/Grass	Topsoil	Topsoil	Rainfall_fed	Rainfall_fed	1	ns
Luvisol	Luvisol	Fallow	Brassica/Grass	Topsoil	Topsoil	Rainfall_fed	Rainfall_fed	1	ns
Podzol	Luvisol	Fallow	Brassica/Grass	Topsoil	Topsoil	Rainfall_fed	Rainfall_fed	1	ns
Podzol	Luvisol	Legume/Grass	Brassica/Grass	Topsoil	Topsoil	Rainfall_fed	Rainfall_fed	1	ns
Phaeozem	Phaeozem	Fallow	Brassica/Grass	Topsoil	Topsoil	Rainfall_fed	Rainfall_fed	1	ns
Phaeozem	Phaeozem	Legume/Grass	Brassica/Grass	Topsoil	Topsoil	Rainfall_fed	Rainfall_fed	1	ns
Podzol	Podzol	Legume/Grass	Brassica/Grass	Topsoil	Topsoil	Rainfall_fed	Rainfall_fed	1	ns
Podzol	Luvisol	Fallow	Fallow	Topsoil	Topsoil	Rainfall_fed	Rainfall_fed	1	ns
Podzol	Luvisol	Legume/Grass	Fallow	Topsoil	Topsoil	Rainfall_fed	Rainfall_fed	1	ns
Podzol	Podzol	Legume/Grass	Fallow	Topsoil	Topsoil	Rainfall_fed	Rainfall_fed	1	ns
