# Supplementary material
Source: Research Square preprint supplement (doi:10.21203/rs.3.rs-9052155/v1)
Supplement: Supplementary file 8 [file 84aa1d0240b25fd72e7501f4.docx]

Supplementary information

Fungal response to drought in the maize rhizosphere after reusing cover crop root channels

Ghosh et al.

Correspondence: [nico.jehmlich@ufz.de](mailto:nico.jehmlich@ufz.de), [debjyoti.ghosh@ufz.de](mailto:debjyoti.ghosh@ufz.de)

# Extended Data

# Results and Discussion

## Fungal-to-bacterial taxonomic and proteomic trends

In complex environmental systems, there is still a considerable lack of information regarding the comparative presence of fungi and bacteria in the same system in terms of their abundance and contribution to functional pathways. We plotted the fungal-to-bacterial abundance ratio along increasing spatial depth under drought (D) and rainfall-fed (RF) conditions in systems with cover crops, calculated as the ratio of ITS2 gene copies per gram of soil to 16S rRNA gene copies per gram of soil measured by qPCR. Bacterial absolute abundances were at least two orders of magnitude higher than fungal abundances, consistent with previous observations1,2 (Fig. S10a, Table S12a). Fungal abundances relatively increased under D as compared to RF as depth increased within the root channels of *Brassicaceae/Poaceae* across all soil types, and we presume this may be due to fungal communities inhabiting these root channels being tolerant to oxidative stress. This trend was not observed in the *Fabaceae/Poaceae* root channels, where fungal abundance increased in the Podzol but declined in the Luvisol. The topsoil of the Phaeozem, which is rich in organic matter and likely contains more recalcitrant substrates that fungi decompose more effectively than bacteria3, explains the significantly higher fungal-to-bacterial ratio compared with the other soil types. The sandy Podzol retains low nutrients, and fungi can survive under low-nutrient conditions better than bacteria4, which is reflected in the increasing trend of fungal abundance in the Podzol subsoil.

We compared the contribution of fungi and bacteria in reused root channels to biochemical pathways. This was done by quantifying the ratio of LFQ intensities of the identified proteins in our metaproteomics analysis, considering only those proteins detected in both fungi and bacteria. In addition, we only selected proteins associated with the dominant fungal phylum *Ascomycota* and the two dominant bacterial phyla *Actinomycetota* and *Pseudomonadota*. As shown in Fig. S10b, fungal contributions to biochemical pathways increased relatively from the topsoil to the subsoil, possibly due to the ability of fungi to tolerate low-nutrient conditions and therefore function more effectively than bacteria in the subsoil (Table S12b). 6-PGDH was contributed relatively more by fungi, particularly *Ascomycota* in the *Fabaceae/Poaceae* root channels, particularly under D in the Podzol, where it contributes to NADPH generation required for cellular redox homeostasis5. The significantly higher expression of SAM synthase from the methionine cycle by fungi (Table S12c) highlights increased contributions under D vs RF in the Luvisol and Podzol, particularly in the subsoils. Together with elevated fungal abundances at these sites, this likely reflects fungal attempts to regulate oxidative stress through glutathione synthesis downstream of the transsulfuration pathway6–8. The silt-rich Phaeozem showed relatively higher bacterial contributions to AK and SOD, suggesting enhanced bacterial roles in oxidative stress mitigation in soils with sufficient nutrient availability.

References

1. Tkacz, A., Hortala, M., and Poole, P.S. (2018). Absolute quantitation of microbiota abundance in environmental samples. Microbiome *6*, 110. https://doi.org/10.1186/s40168-018-0491-7.

2. Rousk, J., Bååth, E., Brookes, P.C., Lauber, C.L., Lozupone, C., Caporaso, J.G., Knight, R., and Fierer, N. (2010). Soil bacterial and fungal communities across a pH gradient in an arable soil. The ISME Journal *4*, 1340–1351. https://doi.org/10.1038/ismej.2010.58.

3. Wang, C., and Kuzyakov, Y. (2024). Mechanisms and implications of bacterial–fungal competition for soil resources. The ISME Journal *18*, wrae073. https://doi.org/10.1093/ismejo/wrae073.

4. Benito‐Carnero, G., Gartzia‐Bengoetxea, N., Arias‐González, A., and Rousk, J. (2021). Low‐quality carbon and lack of nutrients result in a stronger fungal than bacterial home‐field advantage during the decomposition of leaf litter. Functional Ecology *35*, 1783–1796. https://doi.org/10.1111/1365-2435.13822.

5. Fuentes-Lemus, E., Reyes, J.S., Figueroa, J.D., Davies, M.J., and López-Alarcón, C. (2023). The enzymes of the oxidative phase of the pentose phosphate pathway as targets of reactive species: consequences for NADPH production. Biochemical Society Transactions *51*, 2173–2187. https://doi.org/10.1042/bst20231027.

6. Gong, B., Li, X., VandenLangenberg, K.M., Wen, D., Sun, S., Wei, M., Li, Y., Yang, F., Shi, Q., and Wang, X. (2014). Overexpression of S-adenosyl-l-methionine synthetase increased tomato tolerance to alkali stress through polyamine metabolism. Plant Biotechnology Journal *12*, 694–708. https://doi.org/10.1111/pbi.12173.

7. Xi, C., Pang, J., Xue, W., Cui, Y., Jiang, N., Zhi, W., Shi, H., Horuzsko, A., Pace, B.S., and Zhu, X. (2025). Transsulfuration pathway activation attenuates oxidative stress and ferroptosis in sickle primary erythroblasts and transgenic mice. Communications Biology *8*, 15. https://doi.org/10.1038/s42003-024-07424-7.

8. Ghosh, D., Shi, Y., Zimmermann, I.M., Holzhauser, K., von Bergen, M., Kaster, A.-K., Spielvogel, S., Dippold, M.A., Müller, J.A., and Jehmlich, N. (2025). Cover Crop Root Channels Promote Bacterial Adaptation to Drought in the Maize Rhizosphere. Global Change Biology *31*, e70512. https://doi.org/10.1111/gcb.70512.

# Supplementary figures

Figure S1: A bar-chart representing the different values of the physicochemical properties that have been measured at the three soil sampling sites with different soil types – Luvisol (Hohenschulen), Phaeozem (Reinshof) and Podzol (Karkendamm). All values are provided in Table S1.

Figure S2: An alluvial flowchart representing the different variations and the identified fungal phyla in each one of them at the three soil sampling sites. The total number of samples used in the ITS2 gene sequencing analysis were 106 and a metadata have been provided in the Supplementary Table S13.

Figure S3: A heat-tree representation of the differential fungal abundance for the soil types of the three sampling sites. The *log2* values of the relative fungal abundance between site 1 and site 2 are shown by two colours, where ‘purple4’ corresponds to the name of the variation at the top and ‘aquamarine’ to the name on the right side (RStudio colour palettes have been used for colour representation).

Figure S4: A heat-tree representation of the differential fungal abundance in the two layers of soil depth – topsoil and subsoil. The *log2* values of the relative fungal abundance between the layers are shown by two colours, where ‘lightsalmon’ corresponds to topsoil and ‘lightblue4’ to subsoil (RStudio colour palettes have been used for colour representation).

Figure S5: A heat-tree representation of the differential fungal abundance for the cover crop variations and fallow conditions. The *log2* values of the relative fungal abundance between treatments and fallow are shown by two colours, where ‘pink4’ corresponds to the name of the variation at the top and ‘lightgreen’ to the name on the right side (RStudio colour palettes have been used for colour representation).

Figure attached as a vector file (Supplementary Figure S6, PDF)

Figure S6: The extended heatmap from metaproteomics, which includes all the enzymes heavily or sparsely involved in the different functional cycles and fungal phyla corresponding to the enzymes in the three different soil types (Luvisol, Phaeozem and Podzol) under drought and rainfall-fed conditions. For proteomics, *n* = 119. (Additional vector file provided for detailed observations). The significance of the expression of enzymes was measured using MANOVA and have been provided in the Supplementary Table S14.

Figure S7: A summary of the absolute abundance of carbohydrate-active enzymes (CAZymes) represented by label-free quantification (LFQ) intensity, produced by fungal communities categorised by trophic modes defined in the FUNGUILD database under drought and rainfall-fed conditions in our different sampling sites and the different cover crop variations. We have linked the lignocelluloses hydrolysed by these CAZymes on the left-side of the heatmap.

Figure S8a: Soil moisture trends in the topsoil (0-30 cm) and subsoil (30-60 cm) along the experimental durations under drought (D) and rainfall-fed (RF) conditions in the Luvisol.

Figure S8b: Soil moisture trends in the topsoil (0-30 cm) and subsoil (30-60 and 60-120 cm) along the experimental durations under D and RF conditions in the Phaeozem.

Figure S8c: Soil moisture trends in the topsoil (0-30 cm) and subsoil (30-60 and 60-120 cm) along the experimental durations under D and RF conditions in the Podzol.

Figure S9: Pictures of the root overlap regions – the root channels of the winter cover crop regions reused by maize for deeper penetration into the soil profile. These were the regions from which the samples were collected for the ‘maize root in cover crop root channels (MCR)’ samples.

Figure S10: a. A spatial trend of the ratio of ITS2 gene copies in fungi against 16S rRNA gene copies in bacteria across the soil sampling depths (represented by the colour fills of topsoil and subsoil, which are ‘lightsalmon1’ and ‘steelgray’ respectively in the R colour palette) under drought and rainfall-fed conditions for the different cover crop variations (shown by the different coloured trendlines) in the three different soil types; b. A heatmap representing the relative expression of fungal proteins to bacterial proteins for those proteins identified from both organism levels. The colour of the enzyme text is for representing the biochemical cycles to which they contribute. The rows within each facet grid are representing relative expressions under rainfall-fed and drought conditions simultaneously, also indicated by the two small graphical icons to the right of the protein names.
