# Supplementary material
Source: Research Square preprint supplement (doi:10.21203/rs.3.rs-9052155/v1)
Supplement: Supplementary file 9 [file 980b00bded95bf60a8a5faf7.xlsx]

## Sheet: S13
Supplementary Table S13
Metadata comprising of soil physicochemical properties for each samples sampled from different cover crop variations, different sites, soil sampling depths (topsoil : 0-30 cm and subsoil: 30-60 cm) and soil moisture conditions
Sample_Name	Variation	Site	Condition	Source	Cover_crop_category	Year	Project	Subproject	Depth	Plot	Root-extent	TN	TOC	pH	Moisture	Density	Richness
HS-D-1-48-MBS-30	Fallow	Luvisol	Drought	MBS	Fallow	2023	RWS1	SP2	Topsoil	48	No cover crop roots	0.138591	1.42618	6.49175	14.3384	1.7275	1234
HS-D-1-48-MBS-60	Fallow	Luvisol	Drought	MBS	Fallow	2023	RWS1	SP2	Subsoil	48	No cover crop roots	0.0970813	1.07197	6.47989	14.3384	1.56	990
HS-D-1-69-MBS-30	Fallow	Luvisol	Drought	MBS	Fallow	2023	RWS1	SP2	Topsoil	69	No cover crop roots	0.112221	1.10595	6.49175	14.3384	1.7275	746
HS-D-1-69-MBS-60	Fallow	Luvisol	Drought	MBS	Fallow	2023	RWS1	SP2	Subsoil	69	No cover crop roots	0.0924321	0.936232	6.47989	14.3384	1.56	684
HS-D-1-78-MBS-30	Fallow	Luvisol	Drought	MBS	Fallow	2023	RWS1	SP2	Topsoil	78	No cover crop roots	0.0838258	1.00689	6.49175	14.3384	1.7275	987
HS-D-10-47-MBS-30	Brassica/Grass	Luvisol	Drought	MBS	Mixture	2023	RWS1	SP2	Topsoil	47	Mixture	0.148719	1.50944	6.49175	14.3384	1.74625	1036
HS-D-10-47-MBS-60	Brassica/Grass	Luvisol	Drought	MBS	Mixture	2023	RWS1	SP2	Subsoil	47	Mixture	0.132539	1.36406	6.49175	14.3384	1.74625	780
HS-D-10-60-MBS-30	Brassica/Grass	Luvisol	Drought	MBS	Mixture	2023	RWS1	SP2	Topsoil	60	Mixture	0.143569	1.54814	6.49175	14.3384	1.74625	734
HS-D-10-60-MBS-60	Brassica/Grass	Luvisol	Drought	MBS	Mixture	2023	RWS1	SP2	Subsoil	60	Mixture	0.0910189	0.932099	6.49175	14.3384	1.74625	781
HS-D-10-66-MBS-30	Brassica/Grass	Luvisol	Drought	MBS	Mixture	2023	RWS1	SP2	Topsoil	66	Mixture	0.112068	1.07266	6.49175	14.3384	1.74625	876
HS-D-10-66-MBS-60	Brassica/Grass	Luvisol	Drought	MBS	Mixture	2023	RWS1	SP2	Subsoil	66	Mixture	0.042909	0.363582	6.49175	14.3384	1.74625	786
HS-D-8-46-MBS-30	Legume/Grass	Luvisol	Drought	MBS	Mixture	2023	RWS1	SP2	Topsoil	46	Mixture	0.172547	1.873	6.49175	14.3384	1.69	888
HS-D-8-46-MBS-60	Legume/Grass	Luvisol	Drought	MBS	Mixture	2023	RWS1	SP2	Subsoil	46	Mixture	0.125228	1.27221	6.47989	14.3384	1.6475	1022
HS-D-8-67-MBS-30	Legume/Grass	Luvisol	Drought	MBS	Mixture	2023	RWS1	SP2	Topsoil	67	Mixture	0.117779	1.16955	6.49175	14.3384	1.69	886
HS-D-8-67-MBS-60	Legume/Grass	Luvisol	Drought	MBS	Mixture	2023	RWS1	SP2	Subsoil	67	Mixture	0.0378059	0.327099	6.47989	14.3384	1.6475	385
HS-D-8-80-MBS-30	Legume/Grass	Luvisol	Drought	MBS	Mixture	2023	RWS1	SP2	Topsoil	80	Mixture	0.131776	1.33228	6.49175	14.3384	1.69	1038
HS-D-8-80-MBS-60	Legume/Grass	Luvisol	Drought	MBS	Mixture	2023	RWS1	SP2	Subsoil	80	Mixture	0.0702614	0.698525	6.47989	14.3384	1.6475	1047
HS-RF-1-48-MBS-30	Fallow	Luvisol	Rainfall-fed	MBS	Fallow	2023	RWS1	SP2	Topsoil	48	No cover crop roots	0.121957	1.22038	6.49175	16.1554	1.7275	1037
HS-RF-1-48-MBS-60	Fallow	Luvisol	Rainfall-fed	MBS	Fallow	2023	RWS1	SP2	Subsoil	48	No cover crop roots	0.0853042	0.828132	6.47989	16.1554	1.56	1068
HS-RF-1-69-MBS-30	Fallow	Luvisol	Rainfall-fed	MBS	Fallow	2023	RWS1	SP2	Topsoil	69	No cover crop roots	0.137132	1.38705	6.49175	16.1554	1.7275	971
HS-RF-1-69-MBS-60	Fallow	Luvisol	Rainfall-fed	MBS	Fallow	2023	RWS1	SP2	Subsoil	69	No cover crop roots	0.0778793	0.737135	6.47989	16.1554	1.56	557
HS-RF-1-78-MBS-30	Fallow	Luvisol	Rainfall-fed	MBS	Fallow	2023	RWS1	SP2	Topsoil	78	No cover crop roots	0.120953	1.15531	6.49175	16.1554	1.7275	1017
HS-RF-1-78-MBS-60	Fallow	Luvisol	Rainfall-fed	MBS	Fallow	2023	RWS1	SP2	Subsoil	78	No cover crop roots	0.0536263	0.444362	6.47989	16.1554	1.56	241
HS-RF-10-47-MBS-30	Brassica/Grass	Luvisol	Rainfall-fed	MBS	Mixture	2023	RWS1	SP2	Topsoil	47	Mixture	0.124384	1.2487	6.49175	16.1554	1.74625	872
HS-RF-10-47-MBS-60	Brassica/Grass	Luvisol	Rainfall-fed	MBS	Mixture	2023	RWS1	SP2	Subsoil	47	Mixture	0.0343063	0.331798	6.49175	16.1554	1.74625	191
HS-RF-10-60-MBS-30	Brassica/Grass	Luvisol	Rainfall-fed	MBS	Mixture	2023	RWS1	SP2	Topsoil	60	Mixture	0.142357	1.39825	6.49175	16.1554	1.74625	821
HS-RF-10-60-MBS-60	Brassica/Grass	Luvisol	Rainfall-fed	MBS	Mixture	2023	RWS1	SP2	Subsoil	60	Mixture	0.10901	1.06259	6.49175	16.1554	1.74625	900
HS-RF-10-66-MBS-30	Brassica/Grass	Luvisol	Rainfall-fed	MBS	Mixture	2023	RWS1	SP2	Topsoil	66	Mixture	0.12686	1.2445	6.49175	16.1554	1.74625	992
HS-RF-10-66-MBS-60	Brassica/Grass	Luvisol	Rainfall-fed	MBS	Mixture	2023	RWS1	SP2	Subsoil	66	Mixture	0.121155	1.16826	6.49175	16.1554	1.74625	598
HS-RF-8-46-MBS-30	Legume/Grass	Luvisol	Rainfall-fed	MBS	Mixture	2023	RWS1	SP2	Topsoil	46	Mixture	0.140616	1.34337	6.49175	16.1554	1.69	988
HS-RF-8-46-MBS-60	Legume/Grass	Luvisol	Rainfall-fed	MBS	Mixture	2023	RWS1	SP2	Subsoil	46	Mixture	0.108501	1.11299	6.47989	16.1554	1.6475	800
HS-RF-8-67-MBS-30	Legume/Grass	Luvisol	Rainfall-fed	MBS	Mixture	2023	RWS1	SP2	Topsoil	67	Mixture	0.128061	1.27113	6.49175	16.1554	1.69	1122
HS-RF-8-67-MBS-60	Legume/Grass	Luvisol	Rainfall-fed	MBS	Mixture	2023	RWS1	SP2	Subsoil	67	Mixture	0.0606492	0.563205	6.47989	16.1554	1.6475	584
HS-RF-8-80-MBS-30	Legume/Grass	Luvisol	Rainfall-fed	MBS	Mixture	2023	RWS1	SP2	Topsoil	80	Mixture	0.0424373	0.327392	6.49175	16.1554	1.69	711
HS-RF-8-80-MBS-60	Legume/Grass	Luvisol	Rainfall-fed	MBS	Mixture	2023	RWS1	SP2	Subsoil	80	Mixture	0.0726347	0.64142	6.47989	16.1554	1.6475	171
KD-D-1-19-MBS-30	Fallow	Podzol	Drought	MBS	Fallow	2023	RWS1	SP2	Topsoil	19	No cover crop roots	0.146574	1.98095	5.2125	3.85243	1.37778	1068
KD-D-1-19-MBS-60	Fallow	Podzol	Drought	MBS	Fallow	2023	RWS1	SP2	Subsoil	19	No cover crop roots	0.0469817	0.918969	5.21	3.85243	1.54244	984
KD-D-1-21-MBS-30	Fallow	Podzol	Drought	MBS	Fallow	2023	RWS1	SP2	Topsoil	21	No cover crop roots	0.129483	1.71177	5.2125	3.85243	1.37778	1020
KD-D-1-21-MBS-60	Fallow	Podzol	Drought	MBS	Fallow	2023	RWS1	SP2	Subsoil	21	No cover crop roots	0.102774	1.44168	5.21	3.85243	1.54244	132
KD-D-1-28-MBS-30	Fallow	Podzol	Drought	MBS	Fallow	2023	RWS1	SP2	Topsoil	28	Mixture	0.143618	2.0071	5.2125	3.85243	1.37778	559
KD-D-1-28-MBS-60	Fallow	Podzol	Drought	MBS	Fallow	2023	RWS1	SP2	Subsoil	28	Mixture	0.0985905	1.47522	5.21	3.85243	1.54244	1144
KD-D-10-18-MBS-30	Brassica/Grass	Podzol	Drought	MBS	Mixture	2023	RWS1	SP2	Topsoil	18	Mixture	0.126773	1.66897	5.21	3.85243	1.54244	1157
KD-D-10-18-MBS-60	Brassica/Grass	Podzol	Drought	MBS	Mixture	2023	RWS1	SP2	Subsoil	18	Mixture	0.00898129	0.17527	5.21	3.85243	1.35016	183
KD-D-10-23-MBS-30	Brassica/Grass	Podzol	Drought	MBS	Mixture	2023	RWS1	SP2	Topsoil	23	Mixture	0.12254	1.64817	5.21	3.85243	1.35016	791
KD-D-10-23-MBS-60	Brassica/Grass	Podzol	Drought	MBS	Mixture	2023	RWS1	SP2	Subsoil	23	Mixture	0.0305813	0.53903	5.21	3.85243	1.35016	696
KD-D-10-32-MBS-30	Brassica/Grass	Podzol	Drought	MBS	Mixture	2023	RWS1	SP2	Topsoil	32	Mixture	0.12002	1.512	5.21	3.85243	1.35016	1016
KD-D-10-32-MBS-60	Brassica/Grass	Podzol	Drought	MBS	Mixture	2023	RWS1	SP2	Subsoil	32	Mixture	0.14032	1.81794	5.21	3.85243	1.35016	978
KD-D-8-17-MBS-30	Legume/Grass	Podzol	Drought	MBS	Mixture	2023	RWS1	SP2	Topsoil	17	Mixture	0.128741	1.77178	5.21	3.85243	1.35016	1211
KD-D-8-17-MBS-60	Legume/Grass	Podzol	Drought	MBS	Mixture	2023	RWS1	SP2	Subsoil	17	Mixture	0.0201594	0.301041	5.21	3.85243	1.47536	100
KD-D-8-24-MBS-30	Legume/Grass	Podzol	Drought	MBS	Mixture	2023	RWS1	SP2	Topsoil	24	Mixture	0.115996	1.50982	5.21	3.85243	1.47536	1010
KD-D-8-24-MBS-60	Legume/Grass	Podzol	Drought	MBS	Mixture	2023	RWS1	SP2	Subsoil	24	Mixture	0.0464198	0.804581	5.21	3.85243	1.47536	722
KD-D-8-31-MBS-30	Legume/Grass	Podzol	Drought	MBS	Mixture	2023	RWS1	SP2	Topsoil	31	Mixture	0.128261	1.66901	5.21	3.85243	1.47536	1167
KD-D-8-31-MBS-60	Legume/Grass	Podzol	Drought	MBS	Mixture	2023	RWS1	SP2	Subsoil	31	Mixture	0.0893295	1.19294	5.21	3.85243	1.47536	1028
KD-RF-1-19-MBS-30	Fallow	Podzol	Rainfall-fed	MBS	Fallow	2023	RWS1	SP2	Topsoil	19	No cover crop roots	0.177096	2.36687	5.2125	5.58443	1.37778	1014
KD-RF-1-19-MBS-60	Fallow	Podzol	Rainfall-fed	MBS	Fallow	2023	RWS1	SP2	Subsoil	19	No cover crop roots	0.09814	1.58532	5.21	5.58443	1.54244	1137
KD-RF-1-21-MBS-30	Fallow	Podzol	Rainfall-fed	MBS	Fallow	2023	RWS1	SP2	Topsoil	21	No cover crop roots	0.140136	1.8674	5.2125	5.58443	1.37778	1015
KD-RF-1-21-MBS-60	Fallow	Podzol	Rainfall-fed	MBS	Fallow	2023	RWS1	SP2	Subsoil	21	No cover crop roots	0.0694503	1.14759	5.21	5.58443	1.54244	543
KD-RF-1-28-MBS-60	Fallow	Podzol	Rainfall-fed	MBS	Fallow	2023	RWS1	SP2	Subsoil	28	Mixture	0.0479696	0.973014	5.21	5.58443	1.54244	428
KD-RF-10-18-MBS-30	Brassica/Grass	Podzol	Rainfall-fed	MBS	Mixture	2023	RWS1	SP2	Topsoil	18	Mixture	0.136549	1.75119	5.21	5.58443	1.54244	1066
KD-RF-10-18-MBS-60	Brassica/Grass	Podzol	Rainfall-fed	MBS	Mixture	2023	RWS1	SP2	Subsoil	18	Mixture	0.00868974	0.149073	5.21	5.58443	1.35016	488
KD-RF-10-23-MBS-30	Brassica/Grass	Podzol	Rainfall-fed	MBS	Mixture	2023	RWS1	SP2	Topsoil	23	Mixture	0.128182	1.65462	5.21	5.58443	1.35016	994
KD-RF-10-23-MBS-60	Brassica/Grass	Podzol	Rainfall-fed	MBS	Mixture	2023	RWS1	SP2	Subsoil	23	Mixture	0.0441445	0.742828	5.21	5.58443	1.35016	399
KD-RF-10-32-MBS-30	Brassica/Grass	Podzol	Rainfall-fed	MBS	Mixture	2023	RWS1	SP2	Topsoil	32	Mixture	0.116706	1.55545	5.21	5.58443	1.35016	1031
KD-RF-10-32-MBS-60	Brassica/Grass	Podzol	Rainfall-fed	MBS	Mixture	2023	RWS1	SP2	Subsoil	32	Mixture	0.0306482	0.500304	5.21	5.58443	1.35016	195
KD-RF-8-17-MBS-30	Legume/Grass	Podzol	Rainfall-fed	MBS	Mixture	2023	RWS1	SP2	Topsoil	17	Mixture	0.0565706	1.77944	5.21	5.58443	1.35016	1141
KD-RF-8-17-MBS-60	Legume/Grass	Podzol	Rainfall-fed	MBS	Mixture	2023	RWS1	SP2	Subsoil	17	Mixture	0.018181	0.705397	5.21	5.58443	1.47536	356
KD-RF-8-24-MBS-30	Legume/Grass	Podzol	Rainfall-fed	MBS	Mixture	2023	RWS1	SP2	Topsoil	24	Mixture	0.126857	1.67663	5.21	5.58443	1.47536	1011
KD-RF-8-24-MBS-60	Legume/Grass	Podzol	Rainfall-fed	MBS	Mixture	2023	RWS1	SP2	Subsoil	24	Mixture	0.0686587	1.96074	5.21	5.58443	1.47536	551
KD-RF-8-31-MBS-30	Legume/Grass	Podzol	Rainfall-fed	MBS	Mixture	2023	RWS1	SP2	Topsoil	31	Mixture	0.119733	1.60873	5.21	5.58443	1.47536	929
KD-RF-8-31-MBS-60	Legume/Grass	Podzol	Rainfall-fed	MBS	Mixture	2023	RWS1	SP2	Subsoil	31	Mixture	0.0387785	0.609422	5.21	5.58443	1.47536	811
RH-D-1-18-MBS-30	Fallow	Phaeozem	Drought	MBS	Fallow	2023	RWS1	SP2	Topsoil	18	No cover crop roots	0.133173	1.35975	7.14	29.4563	1.1469	655
RH-D-1-18-MBS-60	Fallow	Phaeozem	Drought	MBS	Fallow	2023	RWS1	SP2	Subsoil	18	No cover crop roots	0.058498	0.503372	7.235	29.4563	1.52677	401
RH-D-1-25-MBS-30	Fallow	Phaeozem	Drought	MBS	Fallow	2023	RWS1	SP2	Topsoil	25	No cover crop roots	0.129413	1.23953	7.14	29.4563	1.1469	849
RH-D-1-25-MBS-60	Fallow	Phaeozem	Drought	MBS	Fallow	2023	RWS1	SP2	Subsoil	25	No cover crop roots	0.0588913	0.519282	7.235	29.4563	1.52677	489
RH-D-1-31-MBS-30	Fallow	Phaeozem	Drought	MBS	Fallow	2023	RWS1	SP2	Topsoil	31	No cover crop roots	0.0588913	0.519282	6.49175	14.3384	1.7275	736
RH-D-1-31-MBS-60	Fallow	Phaeozem	Drought	MBS	Fallow	2023	RWS1	SP2	Subsoil	31	No cover crop roots	0.0588913	0.519282	6.47989	14.3384	1.56	437
RH-D-10-19-MBS-30	Brassica/Grass	Phaeozem	Drought	MBS	Mixture	2023	RWS1	SP2	Topsoil	19	Mixture	0.0652585	0.521596	7.14	29.4563	1.7676	921
RH-D-10-19-MBS-60	Brassica/Grass	Phaeozem	Drought	MBS	Mixture	2023	RWS1	SP2	Subsoil	19	Mixture	0.119947	1.09847	7.235	29.4563	2.17787	700
RH-D-10-21-MBS-30	Brassica/Grass	Phaeozem	Drought	MBS	Mixture	2023	RWS1	SP2	Topsoil	21	Mixture	0.136378	1.2979	7.14	29.4563	1.7676	894
RH-D-10-21-MBS-60	Brassica/Grass	Phaeozem	Drought	MBS	Mixture	2023	RWS1	SP2	Subsoil	21	Mixture	0.0469669	0.369448	7.235	29.4563	2.17787	474
RH-D-10-28-MBS-30	Brassica/Grass	Phaeozem	Drought	MBS	Mixture	2023	RWS1	SP2	Topsoil	28	Mixture	0.133906	1.22103	7.14	29.4563	1.7676	827
RH-D-10-28-MBS-60	Brassica/Grass	Phaeozem	Drought	MBS	Mixture	2023	RWS1	SP2	Subsoil	28	Mixture	0.0610723	0.4844	7.235	29.4563	2.17787	636
RH-D-8-20-MBS-30	Legume/Grass	Phaeozem	Drought	MBS	Mixture	2023	RWS1	SP2	Topsoil	20	Mixture	0.135037	1.30315	7.14	29.4563	1.0007	682
RH-D-8-20-MBS-60	Legume/Grass	Phaeozem	Drought	MBS	Mixture	2023	RWS1	SP2	Subsoil	20	Mixture	0.059388	0.495574	7.235	29.4563	1.43243	346
RH-D-8-27-MBS-30	Legume/Grass	Phaeozem	Drought	MBS	Mixture	2023	RWS1	SP2	Topsoil	27	Mixture	0.136417	1.25335	7.14	29.4563	1.0007	572
RH-D-8-27-MBS-60	Legume/Grass	Phaeozem	Drought	MBS	Mixture	2023	RWS1	SP2	Subsoil	27	Mixture	0.0488629	0.355496	7.235	29.4563	1.43243	223
RH-D-8-29-MBS-30	Legume/Grass	Phaeozem	Drought	MBS	Mixture	2023	RWS1	SP2	Topsoil	29	Mixture	0.143746	1.36179	7.14	29.4563	1.0007	581
RH-D-8-29-MBS-60	Legume/Grass	Phaeozem	Drought	MBS	Mixture	2023	RWS1	SP2	Subsoil	29	Mixture	0.0656624	0.547235	7.235	29.4563	1.43243	660
RH-RF-1-18-MBS-30	Fallow	Phaeozem	Rainfall-fed	MBS	Fallow	2023	RWS1	SP2	Topsoil	18	No cover crop roots	0.13679	1.34612	7.14	30.4152	1.1469	887
RH-RF-1-18-MBS-60	Fallow	Phaeozem	Rainfall-fed	MBS	Fallow	2023	RWS1	SP2	Subsoil	18	No cover crop roots	0.0662485	0.601076	7.235	30.4152	1.52677	536
RH-RF-1-25-MBS-30	Fallow	Phaeozem	Rainfall-fed	MBS	Fallow	2023	RWS1	SP2	Topsoil	25	No cover crop roots	0.128358	1.24931	7.14	30.4152	1.1469	654
RH-RF-1-25-MBS-60	Fallow	Phaeozem	Rainfall-fed	MBS	Fallow	2023	RWS1	SP2	Subsoil	25	No cover crop roots	0.0620848	0.595899	7.235	30.4152	1.52677	541
RH-RF-1-31-MBS-30	Fallow	Phaeozem	Rainfall-fed	MBS	Fallow	2023	RWS1	SP2	Topsoil	31	No cover crop roots	0.13473	1.26871	7.14	30.4152	1.1469	919
RH-RF-1-31-MBS-60	Fallow	Phaeozem	Rainfall-fed	MBS	Fallow	2023	RWS1	SP2	Subsoil	31	No cover crop roots	0.0577534	0.503657	7.235	30.4152	1.52677	464
RH-RF-10-19-MBS-30	Brassica/Grass	Phaeozem	Rainfall-fed	MBS	Mixture	2023	RWS1	SP2	Topsoil	19	Mixture	0.129808	1.23294	7.14	30.4152	1.7676	815
RH-RF-10-19-MBS-60	Brassica/Grass	Phaeozem	Rainfall-fed	MBS	Mixture	2023	RWS1	SP2	Subsoil	19	Mixture	0.0657802	0.533002	7.235	30.4152	2.17787	521
RH-RF-10-21-MBS-30	Brassica/Grass	Phaeozem	Rainfall-fed	MBS	Mixture	2023	RWS1	SP2	Topsoil	21	Mixture	0.123841	1.15958	7.14	30.4152	1.7676	686
RH-RF-10-21-MBS-60	Brassica/Grass	Phaeozem	Rainfall-fed	MBS	Mixture	2023	RWS1	SP2	Subsoil	21	Mixture	0.0553774	0.495257	7.235	30.4152	2.17787	473
RH-RF-10-28-MBS-30	Brassica/Grass	Phaeozem	Rainfall-fed	MBS	Mixture	2023	RWS1	SP2	Topsoil	28	Mixture	0.126423	1.2932	7.14	30.4152	1.7676	649
RH-RF-10-28-MBS-60	Brassica/Grass	Phaeozem	Rainfall-fed	MBS	Mixture	2023	RWS1	SP2	Subsoil	28	Mixture	0.088145	0.730336	7.235	30.4152	2.17787	541
RH-RF-8-20-MBS-30	Legume/Grass	Phaeozem	Rainfall-fed	MBS	Mixture	2023	RWS1	SP2	Topsoil	20	Mixture	0.134003	1.26848	7.14	30.4152	1.0007	725
RH-RF-8-20-MBS-60	Legume/Grass	Phaeozem	Rainfall-fed	MBS	Mixture	2023	RWS1	SP2	Subsoil	20	Mixture	0.0791129	0.668835	7.235	30.4152	1.43243	645
RH-RF-8-27-MBS-30	Legume/Grass	Phaeozem	Rainfall-fed	MBS	Mixture	2023	RWS1	SP2	Topsoil	27	Mixture	0.120434	1.149	7.14	30.4152	1.0007	881
RH-RF-8-27-MBS-60	Legume/Grass	Phaeozem	Rainfall-fed	MBS	Mixture	2023	RWS1	SP2	Subsoil	27	Mixture	0.0681766	0.553585	7.235	30.4152	1.43243	364
RH-RF-8-29-MBS-30	Legume/Grass	Phaeozem	Rainfall-fed	MBS	Mixture	2023	RWS1	SP2	Topsoil	29	Mixture	0.130291	1.32937	7.14	30.4152	1.0007	693
RH-RF-8-29-MBS-60	Legume/Grass	Phaeozem	Rainfall-fed	MBS	Mixture	2023	RWS1	SP2	Subsoil	29	Mixture	0.0515812	0.419906	7.235	30.4152	1.43243	166
