# Supplementary material
Source: Research Square preprint supplement (doi:10.21203/rs.3.rs-9052155/v1)
Supplement: Supplementary file 10 [file a6b830ead21d2bb05f26be79.xlsx]

## Sheet: S10
Supplementary Table S10
Summary of the differential expression of proteins estimated between the soil moisture conditions (drought (D) and rainfall-fed (RF)) for each fungal phylum taking into consideration other parameters of interest - cover crop variations, soil sampling sites with different soil types and soil sampling depths
For differential expression, if log2FC > 0.6. and p < 0.05, such comparison is classified as UP
if log2FC < 0.6. and p < 0.05, such comparison is classified as DOWN
Protein_Description	Soil_type	Variation	Depth	mean_log2_LFQ_intensity	log2FC_(Drought/Rainfall-fed)	Condition_A	Condition_B	p.value_adjusted	p.value_adjusted_significance	Differential_expression
1-pyrroline-5-carboxylate dehydrogenase	Luvisol	Brassica/Grass	Subsoil	6.39584	-2.00348	Drought	Rainfall-fed	0.144127	ns	NO
1-pyrroline-5-carboxylate dehydrogenase	Luvisol	Legume/Grass	Subsoil	7.34343	0	Drought	Rainfall-fed	0.144127	ns	NO
1-pyrroline-5-carboxylate dehydrogenase	Luvisol	Brassica/Grass	Topsoil	9.90697	7.96335	Drought	Rainfall-fed	0.144127	ns	NO
1-pyrroline-5-carboxylate dehydrogenase	Luvisol	Fallow	Topsoil	7.72983	3.10819	Drought	Rainfall-fed	0.144127	ns	NO
1-pyrroline-5-carboxylate dehydrogenase	Luvisol	Fallow	Subsoil	4.97617	-0.356059	Drought	Rainfall-fed	0.144127	ns	NO
1-pyrroline-5-carboxylate dehydrogenase	Luvisol	Legume/Grass	Topsoil	9.99226	5.96795	Drought	Rainfall-fed	0.144127	ns	NO
1-pyrroline-5-carboxylate dehydrogenase	Phaeozem	Legume/Grass	Subsoil	4.51727	-1.38591	Drought	Rainfall-fed	0.36131	ns	NO
1-pyrroline-5-carboxylate dehydrogenase	Phaeozem	Fallow	Subsoil	3.96922	-5.51711	Drought	Rainfall-fed	0.36131	ns	NO
1-pyrroline-5-carboxylate dehydrogenase	Phaeozem	Fallow	Topsoil	5.98324	0.308112	Drought	Rainfall-fed	0.36131	ns	NO
1-pyrroline-5-carboxylate dehydrogenase	Phaeozem	Brassica/Grass	Topsoil	8.36577	-2.49466	Drought	Rainfall-fed	0.36131	ns	NO
1-pyrroline-5-carboxylate dehydrogenase	Phaeozem	Legume/Grass	Topsoil	6.56155	-4.18622	Drought	Rainfall-fed	0.36131	ns	NO
3-hydroxydecanoyl-[ACP] dehydratase	Luvisol	Legume/Grass	Topsoil	10.1379	-0.667953	Drought	Rainfall-fed	0.748774	ns	NO
3-hydroxydecanoyl-[ACP] dehydratase	Luvisol	Brassica/Grass	Subsoil	12.0046	2.76433	Drought	Rainfall-fed	0.748774	ns	NO
3-hydroxydecanoyl-[ACP] dehydratase	Luvisol	Brassica/Grass	Topsoil	9.94187	-0.987215	Drought	Rainfall-fed	0.748774	ns	NO
3-hydroxydecanoyl-[ACP] dehydratase	Luvisol	Legume/Grass	Subsoil	9.90399	-1.2556	Drought	Rainfall-fed	0.748774	ns	NO
3-hydroxydecanoyl-[ACP] dehydratase	Luvisol	Fallow	Topsoil	10.4989	2.05307	Drought	Rainfall-fed	0.748774	ns	NO
3-hydroxydecanoyl-[ACP] dehydratase	Luvisol	Fallow	Subsoil	10.588	0.162569	Drought	Rainfall-fed	0.748774	ns	NO
3-hydroxydecanoyl-[ACP] dehydratase	Phaeozem	Brassica/Grass	Topsoil	12.0228	1.5816	Drought	Rainfall-fed	0.00394775	**	UP
3-hydroxydecanoyl-[ACP] dehydratase	Phaeozem	Fallow	Topsoil	11.8232	1.70722	Drought	Rainfall-fed	0.00394775	**	UP
3-hydroxydecanoyl-[ACP] dehydratase	Phaeozem	Fallow	Subsoil	11.7822	1.28006	Drought	Rainfall-fed	0.00394775	**	UP
3-hydroxydecanoyl-[ACP] dehydratase	Phaeozem	Legume/Grass	Topsoil	11.8299	0.828439	Drought	Rainfall-fed	0.00394775	**	UP
3-hydroxydecanoyl-[ACP] dehydratase	Phaeozem	Brassica/Grass	Subsoil	12.533	1.34996	Drought	Rainfall-fed	0.00394775	**	UP
3-hydroxydecanoyl-[ACP] dehydratase	Phaeozem	Legume/Grass	Subsoil	11.8405	0.0908754	Drought	Rainfall-fed	0.00394775	**	NO
3-hydroxydecanoyl-[ACP] dehydratase	Podzol	Legume/Grass	Subsoil	11.6996	-0.694843	Drought	Rainfall-fed	0.521839	ns	NO
3-hydroxydecanoyl-[ACP] dehydratase	Podzol	Brassica/Grass	Subsoil	11.7153	-0.37813	Drought	Rainfall-fed	0.521839	ns	NO
3-hydroxydecanoyl-[ACP] dehydratase	Podzol	Fallow	Subsoil	12.0957	3.53683	Drought	Rainfall-fed	0.521839	ns	NO
3-hydroxydecanoyl-[ACP] dehydratase	Podzol	Brassica/Grass	Topsoil	12.3533	0.496068	Drought	Rainfall-fed	0.521839	ns	NO
3-hydroxydecanoyl-[ACP] dehydratase	Podzol	Legume/Grass	Topsoil	12.6255	0.153378	Drought	Rainfall-fed	0.521839	ns	NO
3-hydroxydecanoyl-[ACP] dehydratase	Podzol	Fallow	Topsoil	12.6311	0.573705	Drought	Rainfall-fed	0.521839	ns	NO
6-phosphogluconolactonase	Podzol	Legume/Grass	Subsoil	11.6456	0.0124889	Drought	Rainfall-fed	0.465209	ns	NO
6-phosphogluconolactonase	Podzol	Brassica/Grass	Topsoil	7.94625	-2.57763	Drought	Rainfall-fed	0.465209	ns	NO
6-phosphogluconolactonase	Podzol	Brassica/Grass	Subsoil	10.748	-0.641314	Drought	Rainfall-fed	0.465209	ns	NO
6-phosphogluconolactonase	Podzol	Fallow	Topsoil	4.56589	-5.98512	Drought	Rainfall-fed	0.465209	ns	NO
6-phosphogluconolactonase	Podzol	Fallow	Subsoil	9.19542	-3.14759	Drought	Rainfall-fed	0.465209	ns	NO
aldehyde dehydrogenase (NAD+)	Luvisol	Legume/Grass	Topsoil	5.94216	0.557215	Drought	Rainfall-fed	0.0104056	*	NO
aldehyde dehydrogenase (NAD+)	Luvisol	Fallow	Topsoil	6.23664	2.32733	Drought	Rainfall-fed	0.0104056	*	UP
aldehyde dehydrogenase (NAD+)	Luvisol	Brassica/Grass	Topsoil	6.03229	0.0794277	Drought	Rainfall-fed	0.0104056	*	NO
aldehyde dehydrogenase (NAD+)	Luvisol	Legume/Grass	Subsoil	6.21378	1.99455	Drought	Rainfall-fed	0.0104056	*	UP
aldehyde dehydrogenase (NAD+)	Luvisol	Brassica/Grass	Subsoil	6.32217	0.524122	Drought	Rainfall-fed	0.0104056	*	NO
aldehyde dehydrogenase (NAD+)	Luvisol	Fallow	Subsoil	7.15933	3.81164	Drought	Rainfall-fed	0.0104056	*	UP
aldehyde dehydrogenase (NAD+)	Phaeozem	Fallow	Subsoil	4.01722	-5.42137	Drought	Rainfall-fed	0.748774	ns	NO
aldehyde dehydrogenase (NAD+)	Phaeozem	Legume/Grass	Topsoil	6.57178	-4.1275	Drought	Rainfall-fed	0.748774	ns	NO
aldehyde dehydrogenase (NAD+)	Phaeozem	Brassica/Grass	Topsoil	8.37447	-2.455	Drought	Rainfall-fed	0.748774	ns	NO
aldehyde dehydrogenase (NAD+)	Phaeozem	Fallow	Topsoil	6.00942	0.317478	Drought	Rainfall-fed	0.748774	ns	NO
aldehyde dehydrogenase (NAD+)	Phaeozem	Brassica/Grass	Subsoil	10.1932	7.46967	Drought	Rainfall-fed	0.748774	ns	NO
aldehyde dehydrogenase (NAD+)	Phaeozem	Legume/Grass	Subsoil	4.55463	-1.40141	Drought	Rainfall-fed	0.748774	ns	NO
aldehyde dehydrogenase (NAD+)	Podzol	Brassica/Grass	Subsoil	7.21091	2.43517	Drought	Rainfall-fed	0.630954	ns	NO
aldehyde dehydrogenase (NAD+)	Podzol	Legume/Grass	Subsoil	8.53544	2.09544	Drought	Rainfall-fed	0.630954	ns	NO
aldehyde dehydrogenase (NAD+)	Podzol	Fallow	Subsoil	3.97067	-2.45968	Drought	Rainfall-fed	0.630954	ns	NO
aldehyde dehydrogenase (NAD+)	Podzol	Legume/Grass	Topsoil	5.38924	-4.60657	Drought	Rainfall-fed	0.630954	ns	NO
aldehyde dehydrogenase (NAD+)	Podzol	Brassica/Grass	Topsoil	6.63841	-1.18188	Drought	Rainfall-fed	0.630954	ns	NO
aldehyde dehydrogenase (NAD+)	Podzol	Fallow	Topsoil	7.38543	0.719964	Drought	Rainfall-fed	0.630954	ns	NO
aldolase	Luvisol	Fallow	Topsoil	8.09424	1.14369	Drought	Rainfall-fed	0.336668	ns	NO
aldolase	Luvisol	Brassica/Grass	Subsoil	7.51185	3.29745	Drought	Rainfall-fed	0.336668	ns	NO
aldolase	Luvisol	Legume/Grass	Subsoil	6.35067	1.98511	Drought	Rainfall-fed	0.336668	ns	NO
aldolase	Luvisol	Legume/Grass	Topsoil	7.55251	0.977545	Drought	Rainfall-fed	0.336668	ns	NO
aldolase	Luvisol	Brassica/Grass	Topsoil	5.33779	-3.78043	Drought	Rainfall-fed	0.336668	ns	NO
aldolase	Luvisol	Fallow	Subsoil	5.02932	0.0168105	Drought	Rainfall-fed	0.336668	ns	NO
aldolase	Phaeozem	Fallow	Topsoil	8.4404	-1.41911	Drought	Rainfall-fed	0.262332	ns	NO
aldolase	Phaeozem	Legume/Grass	Topsoil	7.88585	-1.57734	Drought	Rainfall-fed	0.262332	ns	NO
aldolase	Phaeozem	Brassica/Grass	Topsoil	9.2491	-3.00081	Drought	Rainfall-fed	0.262332	ns	NO
aldolase	Phaeozem	Fallow	Subsoil	9.89535	1.98479	Drought	Rainfall-fed	0.262332	ns	NO
aldolase	Phaeozem	Legume/Grass	Subsoil	5.37784	-1.0964	Drought	Rainfall-fed	0.262332	ns	NO
aldolase	Phaeozem	Brassica/Grass	Subsoil	5.56007	-5.19089	Drought	Rainfall-fed	0.262332	ns	NO
aldolase	Podzol	Brassica/Grass	Subsoil	9.88001	-0.388699	Drought	Rainfall-fed	0.521839	ns	NO
aldolase	Podzol	Legume/Grass	Subsoil	8.76002	2.19042	Drought	Rainfall-fed	0.521839	ns	NO
aldolase	Podzol	Fallow	Subsoil	6.30987	-1.02653	Drought	Rainfall-fed	0.521839	ns	NO
aldolase	Podzol	Legume/Grass	Topsoil	9.98334	0.92224	Drought	Rainfall-fed	0.521839	ns	NO
aldolase	Podzol	Brassica/Grass	Topsoil	8.69468	-2.4604	Drought	Rainfall-fed	0.521839	ns	NO
aldolase	Podzol	Fallow	Topsoil	8.86749	-0.432236	Drought	Rainfall-fed	0.521839	ns	NO
alpha-arabinosidase	Luvisol	Fallow	Topsoil	7.44025	-0.211998	Drought	Rainfall-fed	0.464702	ns	NO
alpha-arabinosidase	Luvisol	Brassica/Grass	Subsoil	9.55331	1.009	Drought	Rainfall-fed	0.464702	ns	NO
alpha-arabinosidase	Luvisol	Brassica/Grass	Topsoil	9.76305	0.855114	Drought	Rainfall-fed	0.464702	ns	NO
alpha-arabinosidase	Luvisol	Legume/Grass	Topsoil	9.66559	0.419456	Drought	Rainfall-fed	0.464702	ns	NO
alpha-arabinosidase	Luvisol	Fallow	Subsoil	4.70025	-0.0407994	Drought	Rainfall-fed	0.464702	ns	NO
alpha-arabinosidase	Phaeozem	Fallow	Subsoil	10.2944	-1.22051	Drought	Rainfall-fed	0.77283	ns	NO
alpha-arabinosidase	Phaeozem	Fallow	Topsoil	7.39871	-3.19694	Drought	Rainfall-fed	0.77283	ns	NO
alpha-arabinosidase	Phaeozem	Brassica/Grass	Topsoil	10.785	1.06764	Drought	Rainfall-fed	0.77283	ns	NO
alpha-arabinosidase	Phaeozem	Legume/Grass	Subsoil	10.1123	0	Drought	Rainfall-fed	0.77283	ns	NO
alpha-arabinosidase	Podzol	Brassica/Grass	Subsoil	10.3404	0	Drought	Rainfall-fed	0.881497	ns	NO
alpha-arabinosidase	Podzol	Fallow	Subsoil	9.98412	-0.526439	Drought	Rainfall-fed	0.881497	ns	NO
alpha-arabinosidase	Podzol	Fallow	Topsoil	11.118	5.07213	Drought	Rainfall-fed	0.881497	ns	NO
alpha-arabinosidase	Podzol	Brassica/Grass	Topsoil	9.69259	0	Drought	Rainfall-fed	0.881497	ns	NO
alpha-arabinosidase	Podzol	Legume/Grass	Topsoil	9.77782	-0.49685	Drought	Rainfall-fed	0.881497	ns	NO
alpha-glucosidase	Luvisol	Fallow	Topsoil	8.11816	-1.81095	Drought	Rainfall-fed	0.748774	ns	NO
alpha-glucosidase	Luvisol	Legume/Grass	Subsoil	10.6805	7.63162	Drought	Rainfall-fed	0.748774	ns	NO
alpha-glucosidase	Luvisol	Brassica/Grass	Subsoil	9.48652	-1.35138	Drought	Rainfall-fed	0.748774	ns	NO
alpha-glucosidase	Luvisol	Fallow	Subsoil	9.19268	0.170993	Drought	Rainfall-fed	0.748774	ns	NO
alpha-glucosidase	Luvisol	Brassica/Grass	Topsoil	10.7257	-0.0044528	Drought	Rainfall-fed	0.748774	ns	NO
alpha-glucosidase	Luvisol	Legume/Grass	Topsoil	10.9706	0.258252	Drought	Rainfall-fed	0.748774	ns	NO
alpha-glucosidase	Phaeozem	Legume/Grass	Topsoil	6.40662	2.08258	Drought	Rainfall-fed	0.037373	*	UP
alpha-glucosidase	Phaeozem	Brassica/Grass	Topsoil	5.17231	-0.556437	Drought	Rainfall-fed	0.037373	*	NO
alpha-glucosidase	Phaeozem	Legume/Grass	Subsoil	5.4142	0.66553	Drought	Rainfall-fed	0.037373	*	UP
alpha-glucosidase	Phaeozem	Brassica/Grass	Subsoil	5.07875	0.204448	Drought	Rainfall-fed	0.037373	*	NO
alpha-glucosidase	Phaeozem	Fallow	Topsoil	5.30711	0.541099	Drought	Rainfall-fed	0.037373	*	NO
alpha-glucosidase	Phaeozem	Fallow	Subsoil	5.15182	0.64944	Drought	Rainfall-fed	0.037373	*	UP
aspartokinase	Luvisol	Fallow	Subsoil	11.0976	-0.224713	Drought	Rainfall-fed	0.0781691	ns	NO
aspartokinase	Luvisol	Legume/Grass	Subsoil	8.54463	-4.96677	Drought	Rainfall-fed	0.0781691	ns	NO
aspartokinase	Luvisol	Legume/Grass	Topsoil	11.1929	0.123098	Drought	Rainfall-fed	0.0781691	ns	NO
aspartokinase	Luvisol	Fallow	Topsoil	10.8996	-0.0200703	Drought	Rainfall-fed	0.0781691	ns	NO
aspartokinase	Luvisol	Brassica/Grass	Subsoil	9.92855	-1.62671	Drought	Rainfall-fed	0.0781691	ns	NO
aspartokinase	Luvisol	Brassica/Grass	Topsoil	11.0761	-0.409103	Drought	Rainfall-fed	0.0781691	ns	NO
aspartokinase	Phaeozem	Legume/Grass	Topsoil	9.43923	0.83181	Drought	Rainfall-fed	0.42334	ns	NO
aspartokinase	Phaeozem	Legume/Grass	Subsoil	6.5686	0.47248	Drought	Rainfall-fed	0.42334	ns	NO
aspartokinase	Phaeozem	Brassica/Grass	Topsoil	11.3636	5.76789	Drought	Rainfall-fed	0.42334	ns	NO
aspartokinase	Phaeozem	Fallow	Subsoil	7.22699	0.373317	Drought	Rainfall-fed	0.42334	ns	NO
aspartokinase	Phaeozem	Brassica/Grass	Subsoil	6.76065	0.996257	Drought	Rainfall-fed	0.42334	ns	NO
aspartokinase	Phaeozem	Fallow	Topsoil	7.72899	-0.74058	Drought	Rainfall-fed	0.42334	ns	NO
aspartokinase	Podzol	Fallow	Subsoil	8.61949	2.79337	Drought	Rainfall-fed	1	ns	NO
aspartokinase	Podzol	Brassica/Grass	Subsoil	7.85215	-0.226623	Drought	Rainfall-fed	1	ns	NO
aspartokinase	Podzol	Legume/Grass	Topsoil	7.79431	0.1328	Drought	Rainfall-fed	1	ns	NO
aspartokinase	Podzol	Legume/Grass	Subsoil	5.95064	-8.65314	Drought	Rainfall-fed	1	ns	NO
aspartokinase	Podzol	Fallow	Topsoil	11.4491	-0.232637	Drought	Rainfall-fed	1	ns	NO
aspartokinase	Podzol	Brassica/Grass	Topsoil	11.402	5.36343	Drought	Rainfall-fed	1	ns	NO
beta-glucosidase	Luvisol	Fallow	Topsoil	7.2922	5.06026	Drought	Rainfall-fed	0.42334	ns	NO
beta-glucosidase	Luvisol	Fallow	Subsoil	4.82364	-1.40439	Drought	Rainfall-fed	0.42334	ns	NO
beta-glucosidase	Luvisol	Legume/Grass	Subsoil	8.50488	3.67284	Drought	Rainfall-fed	0.42334	ns	NO
beta-glucosidase	Luvisol	Brassica/Grass	Subsoil	4.82841	-3.63697	Drought	Rainfall-fed	0.42334	ns	NO
beta-glucosidase	Luvisol	Legume/Grass	Topsoil	8.32891	1.34672	Drought	Rainfall-fed	0.42334	ns	NO
beta-glucosidase	Luvisol	Brassica/Grass	Topsoil	7.36131	2.37866	Drought	Rainfall-fed	0.42334	ns	NO
beta-glucosidase	Phaeozem	Legume/Grass	Topsoil	5.76334	-0.915839	Drought	Rainfall-fed	0.144127	ns	NO
beta-glucosidase	Phaeozem	Fallow	Topsoil	5.66812	-1.91329	Drought	Rainfall-fed	0.144127	ns	NO
beta-glucosidase	Phaeozem	Brassica/Grass	Topsoil	4.07528	-4.32636	Drought	Rainfall-fed	0.144127	ns	NO
beta-glucosidase	Phaeozem	Legume/Grass	Subsoil	4.61742	-0.851874	Drought	Rainfall-fed	0.144127	ns	NO
beta-glucosidase	Phaeozem	Brassica/Grass	Subsoil	3.7888	-8.1232	Drought	Rainfall-fed	0.144127	ns	NO
beta-glucosidase	Podzol	Brassica/Grass	Subsoil	5.26279	0.451632	Drought	Rainfall-fed	0.87278	ns	NO
beta-glucosidase	Podzol	Legume/Grass	Subsoil	6.92521	0.296965	Drought	Rainfall-fed	0.87278	ns	NO
beta-glucosidase	Podzol	Legume/Grass	Topsoil	6.35155	-0.28042	Drought	Rainfall-fed	0.87278	ns	NO
beta-glucosidase	Podzol	Fallow	Topsoil	6.58662	-0.604464	Drought	Rainfall-fed	0.87278	ns	NO
beta-glucosidase	Podzol	Fallow	Subsoil	4.04696	-1.7854	Drought	Rainfall-fed	0.87278	ns	NO
beta-glucosidase	Podzol	Brassica/Grass	Topsoil	6.27366	1.90777	Drought	Rainfall-fed	0.87278	ns	NO
carboxymethylenebutenolidase	Phaeozem	Brassica/Grass	Topsoil	11.0937	-1.49801	Drought	Rainfall-fed	0.149541	ns	NO
carboxymethylenebutenolidase	Phaeozem	Fallow	Topsoil	10.3359	-2.59319	Drought	Rainfall-fed	0.149541	ns	NO
carboxymethylenebutenolidase	Phaeozem	Fallow	Subsoil	11.8948	0.48526	Drought	Rainfall-fed	0.149541	ns	NO
carboxymethylenebutenolidase	Phaeozem	Brassica/Grass	Subsoil	11.9757	-0.873516	Drought	Rainfall-fed	0.149541	ns	NO
carboxymethylenebutenolidase	Phaeozem	Legume/Grass	Topsoil	11.3827	-0.246773	Drought	Rainfall-fed	0.149541	ns	NO
carboxymethylenebutenolidase	Phaeozem	Legume/Grass	Subsoil	12.3327	0.229191	Drought	Rainfall-fed	0.149541	ns	NO
catalase-peroxidase	Luvisol	Fallow	Topsoil	8.76032	1.91376	Drought	Rainfall-fed	0.273322	ns	NO
catalase-peroxidase	Luvisol	Brassica/Grass	Subsoil	9.70092	0.662907	Drought	Rainfall-fed	0.273322	ns	NO
catalase-peroxidase	Luvisol	Fallow	Subsoil	4.94217	-5.99496	Drought	Rainfall-fed	0.273322	ns	NO
catalase-peroxidase	Luvisol	Legume/Grass	Subsoil	4.53723	0	Drought	Rainfall-fed	0.273322	ns	NO
catalase-peroxidase	Luvisol	Legume/Grass	Topsoil	8.248	1.27798	Drought	Rainfall-fed	0.273322	ns	NO
catalase-peroxidase	Luvisol	Brassica/Grass	Topsoil	6.25219	-3.88842	Drought	Rainfall-fed	0.273322	ns	NO
catalase-peroxidase	Phaeozem	Fallow	Topsoil	11.1873	0.0187543	Drought	Rainfall-fed	0.87278	ns	NO
catalase-peroxidase	Phaeozem	Brassica/Grass	Topsoil	11.2063	-0.441057	Drought	Rainfall-fed	0.87278	ns	NO
catalase-peroxidase	Phaeozem	Brassica/Grass	Subsoil	6.84429	-3.13653	Drought	Rainfall-fed	0.87278	ns	NO
catalase-peroxidase	Phaeozem	Legume/Grass	Topsoil	11.4317	0.313758	Drought	Rainfall-fed	0.87278	ns	NO
catalase-peroxidase	Phaeozem	Legume/Grass	Subsoil	8.83737	0.269133	Drought	Rainfall-fed	0.87278	ns	NO
catalase-peroxidase	Phaeozem	Fallow	Subsoil	6.92769	2.18922	Drought	Rainfall-fed	0.87278	ns	NO
catalase-peroxidase	Podzol	Brassica/Grass	Subsoil	7.69799	-0.132959	Drought	Rainfall-fed	0.748774	ns	NO
catalase-peroxidase	Podzol	Fallow	Topsoil	8.65786	-2.30938	Drought	Rainfall-fed	0.748774	ns	NO
catalase-peroxidase	Podzol	Legume/Grass	Topsoil	9.30282	-2.16776	Drought	Rainfall-fed	0.748774	ns	NO
catalase-peroxidase	Podzol	Legume/Grass	Subsoil	5.73308	0.36814	Drought	Rainfall-fed	0.748774	ns	NO
catalase-peroxidase	Podzol	Brassica/Grass	Topsoil	10.491	2.59056	Drought	Rainfall-fed	0.748774	ns	NO
catalase-peroxidase	Podzol	Fallow	Subsoil	6.2135	-1.52668	Drought	Rainfall-fed	0.748774	ns	NO
chitin synthase	Luvisol	Legume/Grass	Topsoil	7.54515	0	Drought	Rainfall-fed	0.200825	ns	NO
chitin synthase	Luvisol	Fallow	Subsoil	4.94191	-1.03911	Drought	Rainfall-fed	0.200825	ns	NO
chitin synthase	Luvisol	Fallow	Topsoil	5.99974	5.24299	Drought	Rainfall-fed	0.200825	ns	NO
chitin synthase	Luvisol	Brassica/Grass	Topsoil	6.70127	2.82848	Drought	Rainfall-fed	0.200825	ns	NO
chitin synthase	Luvisol	Brassica/Grass	Subsoil	7.35208	0.38384	Drought	Rainfall-fed	0.200825	ns	NO
chitin synthase	Luvisol	Legume/Grass	Subsoil	4.8553	0	Drought	Rainfall-fed	0.200825	ns	NO
chitinase	Luvisol	Legume/Grass	Topsoil	6.45061	-2.28771	Drought	Rainfall-fed	0.630954	ns	NO
chitinase	Luvisol	Fallow	Topsoil	6.87153	2.29711	Drought	Rainfall-fed	0.630954	ns	NO
chitinase	Luvisol	Brassica/Grass	Topsoil	4.78429	-0.309095	Drought	Rainfall-fed	0.630954	ns	NO
chitinase	Luvisol	Brassica/Grass	Subsoil	5.13374	-1.6377	Drought	Rainfall-fed	0.630954	ns	NO
chitinase	Luvisol	Fallow	Subsoil	3.60796	0.668098	Drought	Rainfall-fed	0.630954	ns	NO
chitinase	Luvisol	Legume/Grass	Subsoil	7.64212	4.63886	Drought	Rainfall-fed	0.630954	ns	NO
endo-beta-mannanase	Podzol	Brassica/Grass	Subsoil	6.43389	-0.806927	Drought	Rainfall-fed	0.630954	ns	NO
endo-beta-mannanase	Podzol	Brassica/Grass	Topsoil	5.31472	-0.760696	Drought	Rainfall-fed	0.630954	ns	NO
endo-beta-mannanase	Podzol	Legume/Grass	Subsoil	8.93611	2.73083	Drought	Rainfall-fed	0.630954	ns	NO
endo-beta-mannanase	Podzol	Fallow	Topsoil	6.35267	-2.71311	Drought	Rainfall-fed	0.630954	ns	NO
endo-beta-mannanase	Podzol	Fallow	Subsoil	9.32226	0.321941	Drought	Rainfall-fed	0.630954	ns	NO
endo-beta-mannanase	Podzol	Legume/Grass	Topsoil	9.01886	-2.00525	Drought	Rainfall-fed	0.630954	ns	NO
endoglucanase	Luvisol	Fallow	Topsoil	7.38817	4.77182	Drought	Rainfall-fed	0.144127	ns	NO
endoglucanase	Luvisol	Legume/Grass	Topsoil	5.36395	-6.27178	Drought	Rainfall-fed	0.144127	ns	NO
endoglucanase	Luvisol	Legume/Grass	Subsoil	7.41213	0	Drought	Rainfall-fed	0.144127	ns	NO
endoglucanase	Luvisol	Brassica/Grass	Topsoil	6.53916	2.25385	Drought	Rainfall-fed	0.144127	ns	NO
endoglucanase	Luvisol	Brassica/Grass	Subsoil	9.55623	6.83265	Drought	Rainfall-fed	0.144127	ns	NO
endoglucanase	Luvisol	Fallow	Subsoil	7.3817	1.6923	Drought	Rainfall-fed	0.144127	ns	NO
glucose-6-phosphate 1-epimerase	Luvisol	Legume/Grass	Subsoil	4.65453	0	Drought	Rainfall-fed	0.464702	ns	NO
glucose-6-phosphate 1-epimerase	Luvisol	Legume/Grass	Topsoil	4.03212	-0.944871	Drought	Rainfall-fed	0.464702	ns	NO
glucose-6-phosphate 1-epimerase	Luvisol	Fallow	Subsoil	2.31609	-3.91123	Drought	Rainfall-fed	0.464702	ns	NO
glucose-6-phosphate 1-epimerase	Luvisol	Brassica/Grass	Subsoil	5.02536	0.916844	Drought	Rainfall-fed	0.464702	ns	NO
glucose-6-phosphate 1-epimerase	Luvisol	Fallow	Topsoil	7.5035	1.8575	Drought	Rainfall-fed	0.464702	ns	NO
glutamate dehydrogenase	Podzol	Brassica/Grass	Topsoil	10.6577	-0.541133	Drought	Rainfall-fed	0.0546639	ns	NO
glutamate dehydrogenase	Podzol	Fallow	Topsoil	11.2909	1.68666	Drought	Rainfall-fed	0.0546639	ns	NO
glutamate dehydrogenase	Podzol	Brassica/Grass	Subsoil	11.0845	3.10311	Drought	Rainfall-fed	0.0546639	ns	NO
glutamate dehydrogenase	Podzol	Legume/Grass	Subsoil	10.5248	3.69511	Drought	Rainfall-fed	0.0546639	ns	NO
glutamate dehydrogenase	Podzol	Legume/Grass	Topsoil	11.377	1.07152	Drought	Rainfall-fed	0.0546639	ns	NO
glutamate dehydrogenase	Podzol	Fallow	Subsoil	9.73266	1.66647	Drought	Rainfall-fed	0.0546639	ns	NO
glutamate racemase	Luvisol	Brassica/Grass	Topsoil	10.1274	8.22933	Drought	Rainfall-fed	0.0446097	*	UP
glutamate racemase	Luvisol	Legume/Grass	Topsoil	7.14656	3.98479	Drought	Rainfall-fed	0.0446097	*	UP
glutamate racemase	Luvisol	Legume/Grass	Subsoil	5.07472	0	Drought	Rainfall-fed	0.0446097	*	NO
glutamate racemase	Luvisol	Brassica/Grass	Subsoil	4.32407	0.0796945	Drought	Rainfall-fed	0.0446097	*	NO
glutamate racemase	Luvisol	Fallow	Topsoil	4.93717	1.81658	Drought	Rainfall-fed	0.0446097	*	UP
glutamate racemase	Luvisol	Fallow	Subsoil	4.50027	-0.0639961	Drought	Rainfall-fed	0.0446097	*	NO
glutamate racemase	Phaeozem	Brassica/Grass	Topsoil	4.76963	-3.62028	Drought	Rainfall-fed	0.624206	ns	NO
glutamate racemase	Phaeozem	Fallow	Subsoil	4.4901	0.0606906	Drought	Rainfall-fed	0.624206	ns	NO
glutamate racemase	Phaeozem	Fallow	Topsoil	5.83291	0.149683	Drought	Rainfall-fed	0.624206	ns	NO
glutamate racemase	Phaeozem	Legume/Grass	Topsoil	7.05182	-0.547968	Drought	Rainfall-fed	0.624206	ns	NO
glutamate racemase	Podzol	Brassica/Grass	Topsoil	10.526	2.46325	Drought	Rainfall-fed	0.630954	ns	NO
glutamate racemase	Podzol	Brassica/Grass	Subsoil	5.68237	-7.25608	Drought	Rainfall-fed	0.630954	ns	NO
glutamate racemase	Podzol	Legume/Grass	Subsoil	5.01096	-0.0658121	Drought	Rainfall-fed	0.630954	ns	NO
glutamate racemase	Podzol	Fallow	Topsoil	10.6149	0.000834359	Drought	Rainfall-fed	0.630954	ns	NO
glutamate racemase	Podzol	Legume/Grass	Topsoil	9.05498	-2.91563	Drought	Rainfall-fed	0.630954	ns	NO
glutamate racemase	Podzol	Fallow	Subsoil	6.46058	3.43555	Drought	Rainfall-fed	0.630954	ns	NO
glycerol-3-phosphate dehydrogenase	Luvisol	Brassica/Grass	Topsoil	6.87236	3.0468	Drought	Rainfall-fed	0.0061699	**	UP
glycerol-3-phosphate dehydrogenase	Luvisol	Fallow	Topsoil	6.38086	3.89404	Drought	Rainfall-fed	0.0061699	**	UP
glycerol-3-phosphate dehydrogenase	Luvisol	Legume/Grass	Subsoil	7.76558	0	Drought	Rainfall-fed	0.0061699	**	NO
glycerol-3-phosphate dehydrogenase	Luvisol	Legume/Grass	Topsoil	7.03059	3.19701	Drought	Rainfall-fed	0.0061699	**	UP
glycerol-3-phosphate dehydrogenase	Luvisol	Fallow	Subsoil	7.46343	3.77296	Drought	Rainfall-fed	0.0061699	**	UP
glycerol-3-phosphate dehydrogenase	Luvisol	Brassica/Grass	Subsoil	6.53784	2.39637	Drought	Rainfall-fed	0.0061699	**	UP
hexosaminidase	Luvisol	Legume/Grass	Topsoil	8.95688	0	Drought	Rainfall-fed	0.245278	ns	NO
hexosaminidase	Luvisol	Brassica/Grass	Subsoil	9.61034	0	Drought	Rainfall-fed	0.245278	ns	NO
hexosaminidase	Luvisol	Legume/Grass	Subsoil	9.21071	0	Drought	Rainfall-fed	0.245278	ns	NO
hexosaminidase	Luvisol	Fallow	Topsoil	10.1188	8.12213	Drought	Rainfall-fed	0.245278	ns	NO
hexosaminidase	Luvisol	Fallow	Subsoil	4.75079	0	Drought	Rainfall-fed	0.245278	ns	NO
hexosaminidase	Podzol	Brassica/Grass	Subsoil	8.53443	4.73542	Drought	Rainfall-fed	0.273322	ns	NO
hexosaminidase	Podzol	Legume/Grass	Subsoil	5.43297	0	Drought	Rainfall-fed	0.273322	ns	NO
hexosaminidase	Podzol	Legume/Grass	Topsoil	9.43456	1.78284	Drought	Rainfall-fed	0.273322	ns	NO
hexosaminidase	Podzol	Fallow	Subsoil	6.93826	0.613409	Drought	Rainfall-fed	0.273322	ns	NO
hexosaminidase	Podzol	Fallow	Topsoil	10.4708	1.32585	Drought	Rainfall-fed	0.273322	ns	NO
hexosaminidase	Podzol	Brassica/Grass	Topsoil	9.86051	2.82291	Drought	Rainfall-fed	0.273322	ns	NO
homocysteine methyltransferase	Luvisol	Brassica/Grass	Topsoil	6.95447	0.0748542	Drought	Rainfall-fed	0.521839	ns	NO
homocysteine methyltransferase	Luvisol	Legume/Grass	Topsoil	7.54415	2.93716	Drought	Rainfall-fed	0.521839	ns	NO
homocysteine methyltransferase	Luvisol	Brassica/Grass	Subsoil	5.19854	-3.45472	Drought	Rainfall-fed	0.521839	ns	NO
homocysteine methyltransferase	Luvisol	Fallow	Topsoil	5.42479	-0.68846	Drought	Rainfall-fed	0.521839	ns	NO
homocysteine methyltransferase	Luvisol	Legume/Grass	Subsoil	8.40545	5.44621	Drought	Rainfall-fed	0.521839	ns	NO
homocysteine methyltransferase	Luvisol	Fallow	Subsoil	5.30273	0.163452	Drought	Rainfall-fed	0.521839	ns	NO
homocysteine methyltransferase	Podzol	Brassica/Grass	Subsoil	5.2984	0	Drought	Rainfall-fed	0.715001	ns	NO
homocysteine methyltransferase	Podzol	Fallow	Subsoil	4.9635	-1.03571	Drought	Rainfall-fed	0.715001	ns	NO
homocysteine methyltransferase	Podzol	Legume/Grass	Subsoil	4.87103	-0.709323	Drought	Rainfall-fed	0.715001	ns	NO
homocysteine methyltransferase	Podzol	Brassica/Grass	Topsoil	6.79645	2.67358	Drought	Rainfall-fed	0.715001	ns	NO
homocysteine methyltransferase	Podzol	Legume/Grass	Topsoil	7.56696	3.0057	Drought	Rainfall-fed	0.715001	ns	NO
homocysteine methyltransferase	Podzol	Fallow	Topsoil	7.27501	2.35579	Drought	Rainfall-fed	0.715001	ns	NO
homoserine dehydrogenase	Luvisol	Brassica/Grass	Topsoil	9.28895	-1.70584	Drought	Rainfall-fed	1	ns	NO
homoserine dehydrogenase	Luvisol	Legume/Grass	Topsoil	10.1969	-0.350306	Drought	Rainfall-fed	1	ns	NO
homoserine dehydrogenase	Luvisol	Fallow	Topsoil	8.86746	0.9741	Drought	Rainfall-fed	1	ns	NO
homoserine dehydrogenase	Luvisol	Brassica/Grass	Subsoil	11.8871	1.68916	Drought	Rainfall-fed	1	ns	NO
homoserine dehydrogenase	Luvisol	Legume/Grass	Subsoil	10.3124	0.294574	Drought	Rainfall-fed	1	ns	NO
homoserine dehydrogenase	Luvisol	Fallow	Subsoil	8.41008	1.4584	Drought	Rainfall-fed	1	ns	NO
malate dehydrogenase	Luvisol	Legume/Grass	Topsoil	9.35573	0.108168	Drought	Rainfall-fed	0.669815	ns	NO
malate dehydrogenase	Luvisol	Brassica/Grass	Subsoil	9.57761	0.0417949	Drought	Rainfall-fed	0.669815	ns	NO
malate dehydrogenase	Luvisol	Brassica/Grass	Topsoil	8.6652	-0.88116	Drought	Rainfall-fed	0.669815	ns	NO
malate dehydrogenase	Luvisol	Fallow	Topsoil	8.64048	2.1298	Drought	Rainfall-fed	0.669815	ns	NO
malate dehydrogenase	Luvisol	Fallow	Subsoil	6.88783	0	Drought	Rainfall-fed	0.669815	ns	NO
malate dehydrogenase	Luvisol	Legume/Grass	Subsoil	8.98787	0	Drought	Rainfall-fed	0.669815	ns	NO
malate dehydrogenase	Phaeozem	Brassica/Grass	Topsoil	8.28627	-1.41313	Drought	Rainfall-fed	1	ns	NO
malate dehydrogenase	Phaeozem	Fallow	Topsoil	7.46982	1.39315	Drought	Rainfall-fed	1	ns	NO
malate dehydrogenase	Phaeozem	Fallow	Subsoil	4.83082	3.67374	Drought	Rainfall-fed	1	ns	NO
malate dehydrogenase	Phaeozem	Legume/Grass	Topsoil	10.2835	2.1354	Drought	Rainfall-fed	1	ns	NO
malate dehydrogenase	Podzol	Brassica/Grass	Subsoil	6.40048	2.74313	Drought	Rainfall-fed	0.521839	ns	NO
malate dehydrogenase	Podzol	Legume/Grass	Subsoil	4.93626	0.307857	Drought	Rainfall-fed	0.521839	ns	NO
malate dehydrogenase	Podzol	Fallow	Subsoil	4.81923	0.102678	Drought	Rainfall-fed	0.521839	ns	NO
malate dehydrogenase	Podzol	Legume/Grass	Topsoil	6.46533	-1.58834	Drought	Rainfall-fed	0.521839	ns	NO
malate dehydrogenase	Podzol	Brassica/Grass	Topsoil	6.55687	-1.71127	Drought	Rainfall-fed	0.521839	ns	NO
malate dehydrogenase	Podzol	Fallow	Topsoil	7.21597	1.2905	Drought	Rainfall-fed	0.521839	ns	NO
methionine synthase	Luvisol	Legume/Grass	Topsoil	7.54415	2.93716	Drought	Rainfall-fed	0.521839	ns	NO
methionine synthase	Luvisol	Brassica/Grass	Topsoil	6.95447	0.0748542	Drought	Rainfall-fed	0.521839	ns	NO
methionine synthase	Luvisol	Legume/Grass	Subsoil	8.40545	5.44621	Drought	Rainfall-fed	0.521839	ns	NO
methionine synthase	Luvisol	Fallow	Topsoil	5.42479	-0.68846	Drought	Rainfall-fed	0.521839	ns	NO
methionine synthase	Luvisol	Brassica/Grass	Subsoil	5.19854	-3.45472	Drought	Rainfall-fed	0.521839	ns	NO
methionine synthase	Luvisol	Fallow	Subsoil	5.30273	0.163452	Drought	Rainfall-fed	0.521839	ns	NO
O-acetylhomoserine (thiol)-lyase	Podzol	Legume/Grass	Topsoil	4.8919	-0.278856	Drought	Rainfall-fed	0.0880815	ns	NO
O-acetylhomoserine (thiol)-lyase	Podzol	Brassica/Grass	Subsoil	4.87693	-1.78734	Drought	Rainfall-fed	0.0880815	ns	NO
O-acetylhomoserine (thiol)-lyase	Podzol	Brassica/Grass	Topsoil	4.16241	-1.06597	Drought	Rainfall-fed	0.0880815	ns	NO
O-acetylhomoserine (thiol)-lyase	Podzol	Fallow	Topsoil	3.20689	0.910258	Drought	Rainfall-fed	0.0880815	ns	NO
O-acetylhomoserine sulfhydrylase	Podzol	Legume/Grass	Topsoil	4.8919	-0.278856	Drought	Rainfall-fed	0.0880815	ns	NO
O-acetylhomoserine sulfhydrylase	Podzol	Brassica/Grass	Subsoil	4.87693	-1.78734	Drought	Rainfall-fed	0.0880815	ns	NO
O-acetylhomoserine sulfhydrylase	Podzol	Brassica/Grass	Topsoil	4.16241	-1.06597	Drought	Rainfall-fed	0.0880815	ns	NO
O-acetylhomoserine sulfhydrylase	Podzol	Fallow	Topsoil	3.20689	0.910258	Drought	Rainfall-fed	0.0880815	ns	NO
phosphoribosylformylglycinamidine synthase	Podzol	Brassica/Grass	Subsoil	5.63575	-7.24832	Drought	Rainfall-fed	0.0061699	**	DOWN
phosphoribosylformylglycinamidine synthase	Podzol	Brassica/Grass	Topsoil	5.54043	-7.06409	Drought	Rainfall-fed	0.0061699	**	DOWN
phosphoribosylformylglycinamidine synthase	Podzol	Legume/Grass	Topsoil	5.50921	-0.315777	Drought	Rainfall-fed	0.0061699	**	NO
phosphoribosylformylglycinamidine synthase	Podzol	Fallow	Subsoil	3.97353	-3.3064	Drought	Rainfall-fed	0.0061699	**	DOWN
phosphoribosylformylglycinamidine synthase	Podzol	Legume/Grass	Subsoil	5.49275	0	Drought	Rainfall-fed	0.0061699	**	NO
phosphoribosylformylglycinamidine synthase	Podzol	Fallow	Topsoil	5.25315	-5.02696	Drought	Rainfall-fed	0.0061699	**	DOWN
pyruvate dehydrogenase complex	Podzol	Brassica/Grass	Topsoil	11.1082	3.53012	Drought	Rainfall-fed	0.630954	ns	NO
pyruvate dehydrogenase complex	Podzol	Legume/Grass	Topsoil	10.8726	2.3701	Drought	Rainfall-fed	0.630954	ns	NO
pyruvate dehydrogenase complex	Podzol	Brassica/Grass	Subsoil	8.59557	0.106197	Drought	Rainfall-fed	0.630954	ns	NO
pyruvate dehydrogenase complex	Podzol	Fallow	Subsoil	6.43671	-2.08852	Drought	Rainfall-fed	0.630954	ns	NO
pyruvate dehydrogenase complex	Podzol	Legume/Grass	Subsoil	7.31365	1.58628	Drought	Rainfall-fed	0.630954	ns	NO
pyruvate dehydrogenase complex	Podzol	Fallow	Topsoil	10.3856	-0.73644	Drought	Rainfall-fed	0.630954	ns	NO
S-adenosylmethionine synthase	Luvisol	Brassica/Grass	Topsoil	8.357	-1.93204	Drought	Rainfall-fed	0.42334	ns	NO
S-adenosylmethionine synthase	Luvisol	Legume/Grass	Topsoil	10.3032	5.48231	Drought	Rainfall-fed	0.42334	ns	NO
S-adenosylmethionine synthase	Luvisol	Brassica/Grass	Subsoil	5.11962	-3.83721	Drought	Rainfall-fed	0.42334	ns	NO
S-adenosylmethionine synthase	Luvisol	Legume/Grass	Subsoil	9.8232	6.63958	Drought	Rainfall-fed	0.42334	ns	NO
S-adenosylmethionine synthase	Luvisol	Fallow	Subsoil	7.06148	0.231185	Drought	Rainfall-fed	0.42334	ns	NO
S-adenosylmethionine synthase	Luvisol	Fallow	Topsoil	7.57793	-0.13534	Drought	Rainfall-fed	0.42334	ns	NO
S-adenosylmethionine synthase	Phaeozem	Brassica/Grass	Topsoil	7.79394	-2.5559	Drought	Rainfall-fed	0.748774	ns	NO
S-adenosylmethionine synthase	Phaeozem	Brassica/Grass	Subsoil	7.49543	0.370846	Drought	Rainfall-fed	0.748774	ns	NO
S-adenosylmethionine synthase	Phaeozem	Legume/Grass	Subsoil	7.97737	-2.21125	Drought	Rainfall-fed	0.748774	ns	NO
S-adenosylmethionine synthase	Phaeozem	Fallow	Subsoil	7.87799	1.89466	Drought	Rainfall-fed	0.748774	ns	NO
S-adenosylmethionine synthase	Phaeozem	Fallow	Topsoil	5.90777	-1.49106	Drought	Rainfall-fed	0.748774	ns	NO
S-adenosylmethionine synthase	Phaeozem	Legume/Grass	Topsoil	8.9828	0.700932	Drought	Rainfall-fed	0.748774	ns	NO
S-adenosylmethionine synthase	Podzol	Brassica/Grass	Topsoil	12.1326	1.49096	Drought	Rainfall-fed	0.630954	ns	NO
S-adenosylmethionine synthase	Podzol	Fallow	Subsoil	9.54278	2.63489	Drought	Rainfall-fed	0.630954	ns	NO
S-adenosylmethionine synthase	Podzol	Legume/Grass	Topsoil	10.1899	-0.87685	Drought	Rainfall-fed	0.630954	ns	NO
S-adenosylmethionine synthase	Podzol	Legume/Grass	Subsoil	9.06285	1.24559	Drought	Rainfall-fed	0.630954	ns	NO
S-adenosylmethionine synthase	Podzol	Brassica/Grass	Subsoil	8.63021	1.07787	Drought	Rainfall-fed	0.630954	ns	NO
S-adenosylmethionine synthase	Podzol	Fallow	Topsoil	10.1511	-2.42193	Drought	Rainfall-fed	0.630954	ns	NO
superoxide dismutase	Phaeozem	Fallow	Topsoil	9.37331	8.96481	Drought	Rainfall-fed	0.00394775	**	UP
superoxide dismutase	Phaeozem	Legume/Grass	Topsoil	7.55584	5.30467	Drought	Rainfall-fed	0.00394775	**	UP
superoxide dismutase	Phaeozem	Brassica/Grass	Topsoil	5.29589	1.71853	Drought	Rainfall-fed	0.00394775	**	UP
superoxide dismutase	Phaeozem	Brassica/Grass	Subsoil	4.96088	0.963893	Drought	Rainfall-fed	0.00394775	**	UP
superoxide dismutase	Phaeozem	Legume/Grass	Subsoil	5.83822	3.08099	Drought	Rainfall-fed	0.00394775	**	UP
superoxide dismutase	Phaeozem	Fallow	Subsoil	5.09117	1.4958	Drought	Rainfall-fed	0.00394775	**	UP
translocase	Podzol	Legume/Grass	Topsoil	9.58408	0.608284	Drought	Rainfall-fed	0.037373	*	UP
translocase	Podzol	Brassica/Grass	Topsoil	9.52407	6.34047	Drought	Rainfall-fed	0.037373	*	UP
translocase	Podzol	Legume/Grass	Subsoil	7.34307	3.21149	Drought	Rainfall-fed	0.037373	*	UP
translocase	Podzol	Fallow	Subsoil	7.79382	4.70356	Drought	Rainfall-fed	0.037373	*	UP
translocase	Podzol	Brassica/Grass	Subsoil	11.322	3.90349	Drought	Rainfall-fed	0.037373	*	UP
translocase	Podzol	Fallow	Topsoil	8.76882	2.92845	Drought	Rainfall-fed	0.037373	*	UP
tryptophan synthase	Phaeozem	Fallow	Subsoil	6.32525	-1.72483	Drought	Rainfall-fed	0.0678892	ns	NO
tryptophan synthase	Phaeozem	Brassica/Grass	Topsoil	6.87412	-0.219597	Drought	Rainfall-fed	0.0678892	ns	NO
tryptophan synthase	Phaeozem	Legume/Grass	Topsoil	5.1125	-4.78398	Drought	Rainfall-fed	0.0678892	ns	NO
tryptophan synthase	Phaeozem	Fallow	Topsoil	9.49715	3.34886	Drought	Rainfall-fed	0.0678892	ns	NO
tryptophan synthase	Phaeozem	Legume/Grass	Subsoil	5.02642	-3.2038	Drought	Rainfall-fed	0.0678892	ns	NO
ubiquitin hydrolase	Phaeozem	Fallow	Subsoil	3.96922	-5.51711	Drought	Rainfall-fed	0.36131	ns	NO
ubiquitin hydrolase	Phaeozem	Legume/Grass	Topsoil	6.56155	-4.18622	Drought	Rainfall-fed	0.36131	ns	NO
ubiquitin hydrolase	Phaeozem	Brassica/Grass	Topsoil	8.36577	-2.49466	Drought	Rainfall-fed	0.36131	ns	NO
ubiquitin hydrolase	Phaeozem	Legume/Grass	Subsoil	4.51727	-1.38591	Drought	Rainfall-fed	0.36131	ns	NO
ubiquitin hydrolase	Phaeozem	Fallow	Topsoil	5.98324	0.308112	Drought	Rainfall-fed	0.36131	ns	NO
urease	Podzol	Legume/Grass	Subsoil	7.64611	2.84602	Drought	Rainfall-fed	0.149541	ns	NO
urease	Podzol	Brassica/Grass	Topsoil	9.60012	5.37207	Drought	Rainfall-fed	0.149541	ns	NO
urease	Podzol	Brassica/Grass	Subsoil	7.29768	2.51098	Drought	Rainfall-fed	0.149541	ns	NO
urease	Podzol	Legume/Grass	Topsoil	9.22956	-2.53855	Drought	Rainfall-fed	0.149541	ns	NO
urease	Podzol	Fallow	Topsoil	10.3894	2.68301	Drought	Rainfall-fed	0.149541	ns	NO
urease	Podzol	Fallow	Subsoil	6.54517	1.52144	Drought	Rainfall-fed	0.149541	ns	NO
