# Supplementary material
Source: Research Square preprint supplement (doi:10.21203/rs.3.rs-9052155/v1)
Supplement: Supplementary file 11 [file cd09dd667498e371f61b6982.xlsx]

## Sheet: S14
Supplementary Table S14
Summary of Tukey’s post hoc comparisons following pairwise significance tests using six-way ANOVA of the log2-normalized values of the label-free quantification (LFQ) intensity of the identified proteins linked to multiple sampling sites, soil moisture conditions, cover crop variations, the fungal communities, soil sampling depths and soil moisture conditions observed in the study. In this table,…
Confidence intervals: *p < 0.05, **p < 0.01, ***p < 0.001, ****p < 0.0001
Proteins	Phylum	Soil_type	Variation	Depth	Condition_A	Condition_B	p.value_adjusted	p.value_adjusted_significance
beta-glucosidase	Ascomycota	Luvisol	Brassica/Grass	Subsoil	Rainfall-fed	Drought	6.94256e-11	****
endoglucanase	Ascomycota	Luvisol	Brassica/Grass	Subsoil	Rainfall-fed	Drought	1.04593e-10	****
glycerol-3-phosphate dehydrogenase	Ascomycota	Luvisol	Brassica/Grass	Subsoil	Rainfall-fed	Drought	1.46072e-10	****
aldolase	Zoopagomycota	Luvisol	Brassica/Grass	Subsoil	Rainfall-fed	Drought	0.0034348	**
beta-glucosidase	Ascomycota	Phaeozem	Brassica/Grass	Subsoil	Rainfall-fed	Drought	3.74367e-13	****
catalase-peroxidase	Ascomycota	Phaeozem	Brassica/Grass	Subsoil	Rainfall-fed	Drought	3.9316e-09	****
S-adenosylmethionine synthase	Ascomycota	Phaeozem	Brassica/Grass	Subsoil	Rainfall-fed	Drought	3.74367e-13	****
aldehyde dehydrogenase (NAD+)	Basidiomycota	Phaeozem	Brassica/Grass	Subsoil	Rainfall-fed	Drought	6.47817e-11	****
S-adenosylmethionine synthase	Basidiomycota	Phaeozem	Brassica/Grass	Subsoil	Rainfall-fed	Drought	3.59597e-09	****
aldolase	Chytridiomycota	Phaeozem	Brassica/Grass	Subsoil	Rainfall-fed	Drought	6.77477e-09	****
aldolase	Zoopagomycota	Phaeozem	Brassica/Grass	Subsoil	Rainfall-fed	Drought	7.08903e-11	****
beta-glucosidase	Basidiomycota	Podzol	Brassica/Grass	Subsoil	Rainfall-fed	Drought	4.14678e-10	****
S-adenosylmethionine synthase	Basidiomycota	Podzol	Brassica/Grass	Subsoil	Rainfall-fed	Drought	5.0985e-08	****
beta-glucosidase	Chytridiomycota	Podzol	Brassica/Grass	Subsoil	Rainfall-fed	Drought	4.23539e-06	****
glutamate racemase	Mucoromycota	Podzol	Brassica/Grass	Subsoil	Rainfall-fed	Drought	1.44243e-08	****
phosphoribosylformylglycinamidine synthase	Zoopagomycota	Podzol	Brassica/Grass	Subsoil	Rainfall-fed	Drought	1.54512e-08	****
aldehyde dehydrogenase (NAD+)	Ascomycota	Luvisol	Fallow	Subsoil	Rainfall-fed	Drought	1.06259e-06	****
catalase-peroxidase	Ascomycota	Luvisol	Fallow	Subsoil	Rainfall-fed	Drought	3.74367e-13	****
glycerol-3-phosphate dehydrogenase	Ascomycota	Luvisol	Fallow	Subsoil	Rainfall-fed	Drought	2.25919e-08	****
1-pyrroline-5-carboxylate dehydrogenase	Mucoromycota	Luvisol	Fallow	Subsoil	Rainfall-fed	Drought	0.00128429	**
S-adenosylmethionine synthase	Ascomycota	Phaeozem	Fallow	Subsoil	Rainfall-fed	Drought	5.68966e-11	****
1-pyrroline-5-carboxylate dehydrogenase	Basidiomycota	Phaeozem	Fallow	Subsoil	Rainfall-fed	Drought	0.00966856	**
aldehyde dehydrogenase (NAD+)	Basidiomycota	Phaeozem	Fallow	Subsoil	Rainfall-fed	Drought	3.74367e-13	****
ubiquitin hydrolase	Basidiomycota	Phaeozem	Fallow	Subsoil	Rainfall-fed	Drought	0.00966856	**
aldehyde dehydrogenase (NAD+)	Mucoromycota	Phaeozem	Fallow	Subsoil	Rainfall-fed	Drought	1.56052e-10	****
S-adenosylmethionine synthase	Ascomycota	Podzol	Fallow	Subsoil	Rainfall-fed	Drought	6.99335e-11	****
S-adenosylmethionine synthase	Basidiomycota	Podzol	Fallow	Subsoil	Rainfall-fed	Drought	3.74367e-13	****
S-adenosylmethionine synthase	Chytridiomycota	Podzol	Fallow	Subsoil	Rainfall-fed	Drought	0.0195208	*
S-adenosylmethionine synthase	Zoopagomycota	Podzol	Fallow	Subsoil	Rainfall-fed	Drought	0.0195208	*
alpha-glucosidase	Ascomycota	Luvisol	Legume/Grass	Subsoil	Rainfall-fed	Drought	5.27845e-10	****
S-adenosylmethionine synthase	Ascomycota	Luvisol	Legume/Grass	Subsoil	Rainfall-fed	Drought	4.29062e-06	****
chitinase	Basidiomycota	Luvisol	Legume/Grass	Subsoil	Rainfall-fed	Drought	6.97383e-09	****
homocysteine methyltransferase	Basidiomycota	Luvisol	Legume/Grass	Subsoil	Rainfall-fed	Drought	0.0149064	*
methionine synthase	Basidiomycota	Luvisol	Legume/Grass	Subsoil	Rainfall-fed	Drought	0.0149064	*
S-adenosylmethionine synthase	Basidiomycota	Luvisol	Legume/Grass	Subsoil	Rainfall-fed	Drought	1.31406e-05	****
S-adenosylmethionine synthase	Basidiomycota	Phaeozem	Legume/Grass	Subsoil	Rainfall-fed	Drought	1.59752e-06	****
aspartokinase	Ascomycota	Podzol	Legume/Grass	Subsoil	Rainfall-fed	Drought	6.8201e-11	****
S-adenosylmethionine synthase	Ascomycota	Podzol	Legume/Grass	Subsoil	Rainfall-fed	Drought	7.14021e-11	****
S-adenosylmethionine synthase	Mucoromycota	Podzol	Legume/Grass	Subsoil	Rainfall-fed	Drought	0.00788833	**
1-pyrroline-5-carboxylate dehydrogenase	Ascomycota	Luvisol	Brassica/Grass	Topsoil	Rainfall-fed	Drought	3.74367e-13	****
catalase-peroxidase	Ascomycota	Luvisol	Brassica/Grass	Topsoil	Rainfall-fed	Drought	6.90794e-11	****
aldolase	Chytridiomycota	Luvisol	Brassica/Grass	Topsoil	Rainfall-fed	Drought	0.000437448	***
glutamate racemase	Mucoromycota	Luvisol	Brassica/Grass	Topsoil	Rainfall-fed	Drought	7.44034e-11	****
aldolase	Zoopagomycota	Luvisol	Brassica/Grass	Topsoil	Rainfall-fed	Drought	7.94766e-09	****
aspartokinase	Ascomycota	Phaeozem	Brassica/Grass	Topsoil	Rainfall-fed	Drought	0.00190244	**
beta-glucosidase	Ascomycota	Phaeozem	Brassica/Grass	Topsoil	Rainfall-fed	Drought	3.74367e-13	****
aldehyde dehydrogenase (NAD+)	Basidiomycota	Phaeozem	Brassica/Grass	Topsoil	Rainfall-fed	Drought	0.00951943	**
S-adenosylmethionine synthase	Basidiomycota	Phaeozem	Brassica/Grass	Topsoil	Rainfall-fed	Drought	7.00008e-11	****
aspartokinase	Ascomycota	Podzol	Brassica/Grass	Topsoil	Rainfall-fed	Drought	0.0243007	*
catalase-peroxidase	Ascomycota	Podzol	Brassica/Grass	Topsoil	Rainfall-fed	Drought	0.00353904	**
S-adenosylmethionine synthase	Ascomycota	Podzol	Brassica/Grass	Topsoil	Rainfall-fed	Drought	3.74367e-13	****
urease	Chytridiomycota	Podzol	Brassica/Grass	Topsoil	Rainfall-fed	Drought	0.0231124	*
phosphoribosylformylglycinamidine synthase	Zoopagomycota	Podzol	Brassica/Grass	Topsoil	Rainfall-fed	Drought	7.77411e-08	****
beta-glucosidase	Ascomycota	Luvisol	Fallow	Topsoil	Rainfall-fed	Drought	7.00192e-11	****
chitin synthase	Ascomycota	Luvisol	Fallow	Topsoil	Rainfall-fed	Drought	0.0477477	*
endoglucanase	Ascomycota	Luvisol	Fallow	Topsoil	Rainfall-fed	Drought	1.81249e-07	****
hexosaminidase	Ascomycota	Luvisol	Fallow	Topsoil	Rainfall-fed	Drought	8.04343e-11	****
1-pyrroline-5-carboxylate dehydrogenase	Mucoromycota	Luvisol	Fallow	Topsoil	Rainfall-fed	Drought	6.95626e-11	****
chitinase	Zoopagomycota	Luvisol	Fallow	Topsoil	Rainfall-fed	Drought	0.0047921	**
beta-glucosidase	Ascomycota	Phaeozem	Fallow	Topsoil	Rainfall-fed	Drought	0.000919293	***
S-adenosylmethionine synthase	Ascomycota	Phaeozem	Fallow	Topsoil	Rainfall-fed	Drought	6.99797e-11	****
superoxide dismutase	Ascomycota	Phaeozem	Fallow	Topsoil	Rainfall-fed	Drought	6.94543e-11	****
6-phosphogluconolactonase	Ascomycota	Podzol	Fallow	Topsoil	Rainfall-fed	Drought	6.69385e-11	****
catalase-peroxidase	Ascomycota	Podzol	Fallow	Topsoil	Rainfall-fed	Drought	0.03742	*
S-adenosylmethionine synthase	Ascomycota	Podzol	Fallow	Topsoil	Rainfall-fed	Drought	1.6577e-11	****
S-adenosylmethionine synthase	Basidiomycota	Podzol	Fallow	Topsoil	Rainfall-fed	Drought	8.78916e-08	****
1-pyrroline-5-carboxylate dehydrogenase	Ascomycota	Luvisol	Legume/Grass	Topsoil	Rainfall-fed	Drought	3.74367e-13	****
endoglucanase	Ascomycota	Luvisol	Legume/Grass	Topsoil	Rainfall-fed	Drought	6.92681e-11	****
S-adenosylmethionine synthase	Ascomycota	Luvisol	Legume/Grass	Topsoil	Rainfall-fed	Drought	0.011055	*
S-adenosylmethionine synthase	Basidiomycota	Luvisol	Legume/Grass	Topsoil	Rainfall-fed	Drought	0.0177557	*
superoxide dismutase	Ascomycota	Phaeozem	Legume/Grass	Topsoil	Rainfall-fed	Drought	0.0339727	*
aldehyde dehydrogenase (NAD+)	Basidiomycota	Phaeozem	Legume/Grass	Topsoil	Rainfall-fed	Drought	6.78206e-11	****
beta-glucosidase	Basidiomycota	Phaeozem	Legume/Grass	Topsoil	Rainfall-fed	Drought	8.82085e-05	****
aldehyde dehydrogenase (NAD+)	Mucoromycota	Phaeozem	Legume/Grass	Topsoil	Rainfall-fed	Drought	0.000665273	***
aldehyde dehydrogenase (NAD+)	Ascomycota	Podzol	Legume/Grass	Topsoil	Rainfall-fed	Drought	7.68062e-11	****
S-adenosylmethionine synthase	Ascomycota	Podzol	Legume/Grass	Topsoil	Rainfall-fed	Drought	7.08525e-11	****
