# Supplementary material
Source: Research Square preprint supplement (doi:10.21203/rs.3.rs-9052155/v1)
Supplement: Supplementary file 12 [file cebf05468864a71f366dfc1f.xlsx]

## Sheet: S3
Supplementary Table S3
Summary of pairwise significance tests using multivariate analysis of variance (MANOVA) of the phylotype abundances for individual phyla at different sites with distinct soil properties and soil moisture conditions - drought (D) and rainfall-fed (RF)
Confidence intervals: *p < 0.05, **p < 0.01, ***p < 0.001, ****p < 0.0001
Total number of samples, n = 134.
Soil_type	Phylum_A	Phylum_B	Condition_A	Condition_B	p.value_adjusted	p.value_adjusted_significance
Luvisol	Ascomycota	Aphelidiomycota	Rainfall_fed	Drought	0.0391044	*
Phaeozem	Ascomycota	Aphelidiomycota	Drought	Drought	0.000360707	***
Phaeozem	Ascomycota	Aphelidiomycota	Rainfall_fed	Drought	0	****
Phaeozem	Basidiomycota	Ascomycota	Drought	Drought	0.00215987	**
Phaeozem	Blastocladiomycota	Ascomycota	Drought	Drought	0.000346101	***
Phaeozem	Chytridiomycota	Ascomycota	Drought	Drought	0.000410138	***
Phaeozem	Cryptomycota	Ascomycota	Drought	Drought	0.000460854	***
Phaeozem	Entorrhizomycota	Ascomycota	Drought	Drought	0.000346018	***
Phaeozem	Fungi_phy_Incertae_sedis	Ascomycota	Drought	Drought	0.00164099	**
Phaeozem	Mucoromycota	Ascomycota	Drought	Drought	0.00142991	**
Phaeozem	Olpidiomycota	Ascomycota	Drought	Drought	0.000346868	***
Phaeozem	Unclassified Fungi	Ascomycota	Drought	Drought	0.00397676	**
Phaeozem	Zoopagomycota	Ascomycota	Drought	Drought	0.000622346	***
Phaeozem	Aphelidiomycota	Ascomycota	Rainfall_fed	Drought	0.000376088	***
Phaeozem	Ascomycota	Ascomycota	Rainfall_fed	Drought	0.00216171	**
Phaeozem	Basidiomycota	Ascomycota	Rainfall_fed	Drought	0.00625155	**
Phaeozem	Blastocladiomycota	Ascomycota	Rainfall_fed	Drought	0.000346072	***
Phaeozem	Chytridiomycota	Ascomycota	Rainfall_fed	Drought	0.00044966	***
Phaeozem	Cryptomycota	Ascomycota	Rainfall_fed	Drought	0.000918698	***
Phaeozem	Entorrhizomycota	Ascomycota	Rainfall_fed	Drought	0.000346018	***
Phaeozem	Fungi_phy_Incertae_sedis	Ascomycota	Rainfall_fed	Drought	0.00402221	**
Phaeozem	Mucoromycota	Ascomycota	Rainfall_fed	Drought	0.00369395	**
Phaeozem	Olpidiomycota	Ascomycota	Rainfall_fed	Drought	0.000346721	***
Phaeozem	Unclassified Fungi	Ascomycota	Rainfall_fed	Drought	0.0180164	*
Phaeozem	Zoopagomycota	Ascomycota	Rainfall_fed	Drought	0.00100529	**
Phaeozem	Ascomycota	Basidiomycota	Rainfall_fed	Drought	0	****
Luvisol	Ascomycota	Blastocladiomycota	Rainfall_fed	Drought	0.038268	*
Phaeozem	Ascomycota	Blastocladiomycota	Rainfall_fed	Drought	0	****
Luvisol	Ascomycota	Chytridiomycota	Rainfall_fed	Drought	0.0433057	*
Phaeozem	Ascomycota	Chytridiomycota	Rainfall_fed	Drought	0	****
Luvisol	Ascomycota	Cryptomycota	Rainfall_fed	Drought	0.0445548	*
Phaeozem	Ascomycota	Cryptomycota	Rainfall_fed	Drought	0	****
Luvisol	Ascomycota	Entorrhizomycota	Rainfall_fed	Drought	0.038263	*
Phaeozem	Ascomycota	Entorrhizomycota	Rainfall_fed	Drought	0	****
Phaeozem	Ascomycota	Fungi_phy_Incertae_sedis	Rainfall_fed	Drought	0	****
Phaeozem	Ascomycota	Mucoromycota	Rainfall_fed	Drought	0	****
Luvisol	Ascomycota	Olpidiomycota	Rainfall_fed	Drought	0.0383961	*
Phaeozem	Ascomycota	Olpidiomycota	Rainfall_fed	Drought	0	****
Phaeozem	Ascomycota	Unclassified Fungi	Rainfall_fed	Drought	0	****
Luvisol	Ascomycota	Zoopagomycota	Rainfall_fed	Drought	0.0440437	*
Phaeozem	Ascomycota	Zoopagomycota	Rainfall_fed	Drought	0	****
Luvisol	Ascomycota	Aphelidiomycota	Rainfall_fed	Rainfall_fed	0.0413461	*
Phaeozem	Ascomycota	Aphelidiomycota	Rainfall_fed	Rainfall_fed	0	****
Luvisol	Blastocladiomycota	Ascomycota	Rainfall_fed	Rainfall_fed	0.0382666	*
Luvisol	Chytridiomycota	Ascomycota	Rainfall_fed	Rainfall_fed	0.0437544	*
Luvisol	Entorrhizomycota	Ascomycota	Rainfall_fed	Rainfall_fed	0.038263	*
Luvisol	Olpidiomycota	Ascomycota	Rainfall_fed	Rainfall_fed	0.0382705	*
Luvisol	Zoopagomycota	Ascomycota	Rainfall_fed	Rainfall_fed	0.0475577	*
Phaeozem	Basidiomycota	Ascomycota	Rainfall_fed	Rainfall_fed	0	****
Phaeozem	Blastocladiomycota	Ascomycota	Rainfall_fed	Rainfall_fed	0	****
Phaeozem	Chytridiomycota	Ascomycota	Rainfall_fed	Rainfall_fed	0	****
Phaeozem	Cryptomycota	Ascomycota	Rainfall_fed	Rainfall_fed	0	****
Phaeozem	Entorrhizomycota	Ascomycota	Rainfall_fed	Rainfall_fed	0	****
Phaeozem	Fungi_phy_Incertae_sedis	Ascomycota	Rainfall_fed	Rainfall_fed	0	****
Phaeozem	Mucoromycota	Ascomycota	Rainfall_fed	Rainfall_fed	0	****
Phaeozem	Olpidiomycota	Ascomycota	Rainfall_fed	Rainfall_fed	0	****
Phaeozem	Unclassified Fungi	Ascomycota	Rainfall_fed	Rainfall_fed	0	****
Phaeozem	Zoopagomycota	Ascomycota	Rainfall_fed	Rainfall_fed	0	****
