# Supplementary material
Source: Research Square preprint supplement (doi:10.21203/rs.3.rs-9052155/v1)
Supplement: Supplementary file 13 [file e3907cd91ab136dc1ceb11ae.xlsx]

## Sheet: S2a-h
Supplementary Table S2a
The quantification of the mean and standard deviation of the number of fungal amplicon sequencing variants (ASVs) on the ‘Shannon’ and 'Observed' scale as identified for the individual variations across multiple sites comprising of different soil textures and subjected to different conditions (drought and rainfall-fed)
Variation	Soil_type	Condition	Shannon_ASV.mean	Shannon_ASV.SD	Observed_ASV.mean	Observed_ASV.SD
Brassica/Grass	Luvisol	Drought	5.11247	0.172487	832.167	110.07
Fallow	Luvisol	Drought	5.10508	0.235888	830.571	259.846
Legume/Grass	Luvisol	Drought	5.3075	0.19583	877.667	252.234
Brassica/Grass	Phaeozem	Drought	5.01923	0.296221	742	171.577
Fallow	Phaeozem	Drought	4.83238	0.213321	598.5	197.433
Legume/Grass	Phaeozem	Drought	4.82239	0.329934	510.667	184.516
Brassica/Grass	Podzol	Drought	4.90962	0.574182	803.5	345.63
Fallow	Podzol	Drought	4.86883	0.631439	817.833	393.653
Legume/Grass	Podzol	Drought	5.07136	0.711082	873	415.645
Brassica/Grass	Luvisol	Rainfall-fed	5.00464	0.390346	729	294.594
Fallow	Luvisol	Rainfall-fed	5.08807	0.327978	815.167	338.961
Legume/Grass	Luvisol	Rainfall-fed	4.93147	0.401355	729.333	334.45
Brassica/Grass	Phaeozem	Rainfall-fed	4.93133	0.166647	614.167	127.019
Fallow	Phaeozem	Rainfall-fed	4.98985	0.263703	666.833	193.038
Legume/Grass	Phaeozem	Rainfall-fed	4.62624	0.491645	579	263.312
Brassica/Grass	Podzol	Rainfall-fed	4.88791	0.490921	695.5	379.579
Fallow	Podzol	Rainfall-fed	5.12523	0.353305	827.4	318.696
Legume/Grass	Podzol	Rainfall-fed	5.17782	0.28169	799.833	295.534
Supplementary Table S2b
Quantified mean and standard deviations of Pielou’s evenness of the number of fungal amplicon sequencing variants (ASVs) for the individual variations of cover crops across multiple sites having different soil textures and subjected to different conditions (drought and rainfall-fed)
Variation	Soil_type	Condition	Pielou_ASV.mean	Pielou_ASV.SD
Brassica/Grass	Luvisol	Drought	0.761031	0.0190187
Brassica/Grass	Luvisol	Rainfall-fed	0.775157	0.0332955
Brassica/Grass	Phaeozem	Drought	0.762262	0.0345968
Brassica/Grass	Phaeozem	Rainfall-fed	0.771039	0.0410022
Brassica/Grass	Podzol	Drought	0.749055	0.022158
Brassica/Grass	Podzol	Rainfall-fed	0.767464	0.0278813
Fallow	Luvisol	Drought	0.765303	0.0299902
Fallow	Luvisol	Rainfall-fed	0.774747	0.0431491
Fallow	Phaeozem	Drought	0.761741	0.0442833
Fallow	Phaeozem	Rainfall-fed	0.772378	0.0487793
Fallow	Podzol	Drought	0.748611	0.0232491
Fallow	Podzol	Rainfall-fed	0.771148	0.0207641
Legume/Grass	Luvisol	Drought	0.790416	0.0349005
Legume/Grass	Luvisol	Rainfall-fed	0.76763	0.0419768
Legume/Grass	Phaeozem	Drought	0.784191	0.0535032
Legume/Grass	Phaeozem	Rainfall-fed	0.742011	0.00745232
Legume/Grass	Podzol	Drought	0.777681	0.0266093
Legume/Grass	Podzol	Rainfall-fed	0.78406	0.0326045
Supplementary Table S2c
Summary of Tukey’s post hoc comparisons following significance tests using a four-way PERMANOVA on the beta diversity Bray-Curtis dissimilarity estimation of the distinct parameters – variations, sampling sites, soil depth, and soil moisture conditions - both independently and inter-dependently
Confidence intervals: *p < 0.05, **p < 0.01, ***p < 0.001, ****p < 0.0001
Total number of samples, n = 106.
	Df	SumsOfSqs	F.Model	r2	p.value_adjusted	p.value_adjusted_significance
Site	2	7.92899	0.225725	17.1261	0.001	***
Depth	1	2.34698	0.0668144	10.1386	0.001	***
Variation	2	0.522958	0.0148877	1.12955	0.235	ns
Condition	1	0.208158	0.0059259	0.899213	0.525	ns
Site:Depth	2	1.86341	0.053048	4.02483	0.001	***
Site:Condition	2	0.380971	0.0108456	0.82287	0.767	ns
Site:Variation	4	1.12451	0.0320129	1.21443	0.12	ns
Variation:Condition	2	0.390959	0.0111299	0.844445	0.761	ns
Depth:Condition	1	0.28481	0.00810804	1.23034	0.172	ns
Depth:Variation	2	0.471187	0.0134139	1.01773	0.399	ns
Site:Depth:Variation	4	0.88775	0.0252727	0.958739	0.545	ns
Site:Variation:Condition	4	0.821855	0.0233968	0.887575	0.717	ns
Site:Depth:Condition	2	0.487429	0.0138763	1.05281	0.354	ns
Depth:Variation:Condition	2	0.399161	0.0113634	0.86216	0.654	ns
Site:Depth:Variation:Condition	4	0.803479	0.0228737	0.867729	0.779	ns
Residual	70	16.2042	0.461306	NA	NA	NA
Total	105	35.1268	1	NA	NA	NA
Supplementary Table S2d
Summary of pairwise significance tests using multivariate analysis of variance (MANOVA) of the phylotype abundances for cover crop variations, and the sampling sites with different soil types - Hohenschulen (Luvisol), Karkendamm (Podzol) and Reinshof (Phaeozem)
Confidence intervals: *p < 0.05, **p < 0.01, ***p < 0.001, ****p < 0.0001
Total number of samples, n = 106.
Variation_A	Variation_B	Soil_textures_A	Soil_textures_B	p.adj	p.adj.signif
Fallow	Brassica/Grass	Luvisol	Luvisol	1	ns
Legume/Grass	Brassica/Grass	Luvisol	Luvisol	1	ns
Brassica/Grass	Brassica/Grass	Phaeozem	Luvisol	0.951753	ns
Fallow	Brassica/Grass	Phaeozem	Luvisol	0.999904	ns
Legume/Grass	Brassica/Grass	Phaeozem	Luvisol	0.992271	ns
Brassica/Grass	Brassica/Grass	Podzol	Luvisol	0.999739	ns
Fallow	Brassica/Grass	Podzol	Luvisol	0.99999	ns
Legume/Grass	Brassica/Grass	Podzol	Luvisol	0.999723	ns
Legume/Grass	Fallow	Luvisol	Luvisol	1	ns
Brassica/Grass	Fallow	Phaeozem	Luvisol	0.922113	ns
Fallow	Fallow	Phaeozem	Luvisol	0.999576	ns
Legume/Grass	Fallow	Phaeozem	Luvisol	0.983805	ns
Brassica/Grass	Fallow	Podzol	Luvisol	0.999948	ns
Fallow	Fallow	Podzol	Luvisol	0.999999	ns
Legume/Grass	Fallow	Podzol	Luvisol	0.999944	ns
Brassica/Grass	Legume/Grass	Phaeozem	Luvisol	0.970081	ns
Fallow	Legume/Grass	Phaeozem	Luvisol	0.999981	ns
Legume/Grass	Legume/Grass	Phaeozem	Luvisol	0.996337	ns
Brassica/Grass	Legume/Grass	Podzol	Luvisol	0.999186	ns
Fallow	Legume/Grass	Podzol	Luvisol	0.999944	ns
Legume/Grass	Legume/Grass	Podzol	Luvisol	0.999144	ns
Fallow	Brassica/Grass	Phaeozem	Phaeozem	0.998441	ns
Legume/Grass	Brassica/Grass	Phaeozem	Phaeozem	0.999998	ns
Brassica/Grass	Brassica/Grass	Podzol	Phaeozem	0.690385	ns
Fallow	Brassica/Grass	Podzol	Phaeozem	0.810488	ns
Legume/Grass	Brassica/Grass	Podzol	Phaeozem	0.687356	ns
Legume/Grass	Fallow	Phaeozem	Phaeozem	0.999976	ns
Brassica/Grass	Fallow	Podzol	Phaeozem	0.978931	ns
Fallow	Fallow	Podzol	Phaeozem	0.99457	ns
Legume/Grass	Fallow	Podzol	Phaeozem	0.978356	ns
Brassica/Grass	Legume/Grass	Podzol	Phaeozem	0.864951	ns
Fallow	Legume/Grass	Podzol	Phaeozem	0.936694	ns
Legume/Grass	Legume/Grass	Podzol	Phaeozem	0.86289	ns
Fallow	Brassica/Grass	Podzol	Podzol	1	ns
Legume/Grass	Brassica/Grass	Podzol	Podzol	1	ns
Legume/Grass	Fallow	Podzol	Podzol	1	ns
Supplementary Table S2e
Summary of pairwise significance tests using multivariate analysis of variance (MANOVA) of the phylotype abundances for cover crop variations, and the sampling depths in the soil profile - topsoil and subsoil
Confidence intervals: *p < 0.05, **p < 0.01, ***p < 0.001, ****p < 0.0001
Total number of samples, n = 106.
Variation_A	Variation_B	Depth_A	Depth_B	p.adj	p.adj.signif
Fallow	Brassica/Grass	Subsoil	Subsoil	0.974779	ns
Legume/Grass	Brassica/Grass	Subsoil	Subsoil	0.999895	ns
Brassica/Grass	Brassica/Grass	Topsoil	Subsoil	0.00117035	**
Fallow	Brassica/Grass	Topsoil	Subsoil	0.00114596	**
Legume/Grass	Brassica/Grass	Topsoil	Subsoil	0.00101074	**
Legume/Grass	Fallow	Subsoil	Subsoil	0.921725	ns
Brassica/Grass	Fallow	Topsoil	Subsoil	0.0170876	*
Fallow	Fallow	Topsoil	Subsoil	0.0161942	*
Legume/Grass	Fallow	Topsoil	Subsoil	0.0151525	*
Brassica/Grass	Legume/Grass	Topsoil	Subsoil	0.000489448	***
Fallow	Legume/Grass	Topsoil	Subsoil	0.000485003	***
Legume/Grass	Legume/Grass	Topsoil	Subsoil	0.00042016	***
Fallow	Brassica/Grass	Topsoil	Topsoil	1	ns
Legume/Grass	Brassica/Grass	Topsoil	Topsoil	1	ns
Legume/Grass	Fallow	Topsoil	Topsoil	1	ns
Supplementary Table S2f
Summary of pairwise significance tests using multivariate analysis of variance (MANOVA) of the phylotype abundances for cover crop variations, and the soil moisture conditions - drought (D) and rainfall-fed (RF)
Confidence intervals: *p < 0.05, **p < 0.01, ***p < 0.001, ****p < 0.0001
Total number of samples, n = 106.
Variation_A	Variation_B	Condition_A	Condition_B	p.value_adjusted	p.value_adjusted.significance
Fallow	Brassica/Grass	Drought	Drought	0.978344	ns
Legume/Grass	Brassica/Grass	Drought	Drought	0.962267	ns
Brassica/Grass	Brassica/Grass	Rainfall_fed	Drought	0.999992	ns
Fallow	Brassica/Grass	Rainfall_fed	Drought	1	ns
Legume/Grass	Brassica/Grass	Rainfall_fed	Drought	0.995894	ns
Legume/Grass	Fallow	Drought	Drought	0.999999	ns
Brassica/Grass	Fallow	Rainfall_fed	Drought	0.991898	ns
Fallow	Fallow	Rainfall_fed	Drought	0.967793	ns
Legume/Grass	Fallow	Rainfall_fed	Drought	0.819045	ns
Brassica/Grass	Legume/Grass	Rainfall_fed	Drought	0.98348	ns
Fallow	Legume/Grass	Rainfall_fed	Drought	0.947091	ns
Legume/Grass	Legume/Grass	Rainfall_fed	Drought	0.765365	ns
Fallow	Brassica/Grass	Rainfall_fed	Rainfall_fed	0.999942	ns
Legume/Grass	Brassica/Grass	Rainfall_fed	Rainfall_fed	0.987095	ns
Legume/Grass	Fallow	Rainfall_fed	Rainfall_fed	0.997956	ns
Supplementary Table S2g
Summary of Compact Letter Display (CLD) after MANOVA on the fungal richness for cover crop variations, and the soil types taking into consideration the moisture conditions - drought (D) and rainfall-fed (RF)
Confidence intervals: *p < 0.05, **p < 0.01, ***p < 0.001, ****p < 0.0001
Total number of samples, n = 106.
Variation	Soil_type	emmean	CLD
Brassica/Grass	Luvisol	780.583	a
Legume/Grass	Luvisol	803.5	a
Fallow	Luvisol	823.462	a
Legume/Grass	Phaeozem	544.833	a
Fallow	Phaeozem	639.5	a
Brassica/Grass	Phaeozem	678.083	a
Brassica/Grass	Podzol	749.5	a
Fallow	Podzol	822.182	a
Legume/Grass	Podzol	836.417	a
Supplementary Table S2h
Summary of Compact Letter Display (CLD) after MANOVA on the fungal evenness for cover crop variations, and the soil types taking into consideration the moisture conditions - drought (D) and rainfall-fed (RF)
Confidence intervals: *p < 0.05, **p < 0.01, ***p < 0.001, ****p < 0.0001
Total number of samples, n = 106.
Variation	Soil_type	emmean	CLD
Brassica/Grass	Luvisol	0.768094	a
Fallow	Luvisol	0.769662	a
Legume/Grass	Luvisol	0.779023	a
Legume/Grass	Phaeozem	0.763101	b
Brassica/Grass	Phaeozem	0.766651	a
Fallow	Phaeozem	0.768124	a
Brassica/Grass	Podzol	0.75826	a
Fallow	Podzol	0.758855	a
Legume/Grass	Podzol	0.78087	a
