# Supplementary material
Source: Research Square preprint supplement (doi:10.21203/rs.3.rs-9052155/v1)
Supplement: Supplementary file 14 [file f04b395786942eb9a55ae72b.xlsx]

## Sheet: S7a-b
Supplementary Table S7a
Metadata comprising of description of the identified enzymes from different fungal phyla and classes linked to the FUNGUILD database from the different pathways at different soil sampling depths at sites with different soil properties using different cover crop variations with the respective LFQ intensities and the differential expression under drought against rainfall-fed conditions
Cycle	Protein_Description	Variation	Condition	Site	Phylum	Class	trophic_mode_fg	mean_Log2_intensity	fold_change
Acetyl-CoA / Fatty acid synthesis	3-hydroxydecanoyl-[ACP] dehydratase	Brassica/Grass	Drought	Luvisol	Ascomycota	Sordariomycetes	Pathotroph	10.9733	1.27636
Acetyl-CoA / Fatty acid synthesis	3-hydroxydecanoyl-[ACP] dehydratase	Brassica/Grass	Drought	Phaeozem	Ascomycota	Sordariomycetes	Unknown	12.2779	0.981915
Acetyl-CoA / Fatty acid synthesis	3-hydroxydecanoyl-[ACP] dehydratase	Brassica/Grass	Drought	Podzol	Ascomycota	Sordariomycetes	Unknown	12.0343	0.058969
Acetyl-CoA / Fatty acid synthesis	3-hydroxydecanoyl-[ACP] dehydratase	Fallow	Drought	Luvisol	Ascomycota	Sordariomycetes	Unknown	10.5434	1.10782
Acetyl-CoA / Fatty acid synthesis	3-hydroxydecanoyl-[ACP] dehydratase	Fallow	Drought	Phaeozem	Ascomycota	Sordariomycetes	Pathotroph	11.8232	0
Acetyl-CoA / Fatty acid synthesis	3-hydroxydecanoyl-[ACP] dehydratase	Fallow	Drought	Phaeozem	Ascomycota	Sordariomycetes	Unknown	11.7822	1.46409
Acetyl-CoA / Fatty acid synthesis	3-hydroxydecanoyl-[ACP] dehydratase	Fallow	Drought	Podzol	Ascomycota	Sordariomycetes	Pathotroph	12.6311	0
Acetyl-CoA / Fatty acid synthesis	3-hydroxydecanoyl-[ACP] dehydratase	Fallow	Drought	Podzol	Ascomycota	Sordariomycetes	Unknown	12.0957	1.66904
Acetyl-CoA / Fatty acid synthesis	3-hydroxydecanoyl-[ACP] dehydratase	Legume/Grass	Drought	Luvisol	Ascomycota	Sordariomycetes	Pathotroph	10.1379	0
Acetyl-CoA / Fatty acid synthesis	3-hydroxydecanoyl-[ACP] dehydratase	Legume/Grass	Drought	Luvisol	Ascomycota	Sordariomycetes	Unknown	9.90399	-1.13054
Acetyl-CoA / Fatty acid synthesis	3-hydroxydecanoyl-[ACP] dehydratase	Legume/Grass	Drought	Phaeozem	Ascomycota	Sordariomycetes	Unknown	11.8352	0.459657
Acetyl-CoA / Fatty acid synthesis	3-hydroxydecanoyl-[ACP] dehydratase	Legume/Grass	Drought	Podzol	Ascomycota	Sordariomycetes	Pathotroph	12.6255	0
Acetyl-CoA / Fatty acid synthesis	3-hydroxydecanoyl-[ACP] dehydratase	Legume/Grass	Drought	Podzol	Ascomycota	Sordariomycetes	Unknown	11.6996	-0.938581
Acetyl-CoA / Fatty acid synthesis	pyruvate dehydrogenase complex	Brassica/Grass	Drought	Podzol	Ascomycota	Eurotiomycetes	Unknown	9.39227	1.75919
Acetyl-CoA / Fatty acid synthesis	pyruvate dehydrogenase complex	Brassica/Grass	Drought	Podzol	Mucoromycota	Mucoromycetes	Unknown	11.385	0
Acetyl-CoA / Fatty acid synthesis	pyruvate dehydrogenase complex	Fallow	Drought	Podzol	Ascomycota	Eurotiomycetes	Unknown	8.92302	-1.00237
Acetyl-CoA / Fatty acid synthesis	pyruvate dehydrogenase complex	Fallow	Drought	Podzol	Mucoromycota	Mucoromycetes	Unknown	7.48754	-2.28323
Acetyl-CoA / Fatty acid synthesis	pyruvate dehydrogenase complex	Legume/Grass	Drought	Podzol	Ascomycota	Eurotiomycetes	Unknown	9.81233	5.19111
Acetyl-CoA / Fatty acid synthesis	pyruvate dehydrogenase complex	Legume/Grass	Drought	Podzol	Mucoromycota	Mucoromycetes	Pathotroph	10.6838	0
Acetyl-CoA / Fatty acid synthesis	pyruvate dehydrogenase complex	Legume/Grass	Drought	Podzol	Mucoromycota	Mucoromycetes	Pathotroph-Symbiotroph	10.6838	0
Acetyl-CoA / Fatty acid synthesis	pyruvate dehydrogenase complex	Legume/Grass	Drought	Podzol	Mucoromycota	Mucoromycetes	Unknown	4.81445	-6.195
Glycolysis / Gluconeogenesis / TCA cycle	aldolase	Brassica/Grass	Drought	Luvisol	Blastocladiomycota	Blastocladiomycetes	Unknown	5.86572	0.0548649
Glycolysis / Gluconeogenesis / TCA cycle	aldolase	Brassica/Grass	Drought	Luvisol	Chytridiomycota	Chytridiomycetes	Unknown	6.46698	-0.474566
Glycolysis / Gluconeogenesis / TCA cycle	aldolase	Brassica/Grass	Drought	Luvisol	Chytridiomycota	Monoblepharidomycetes	Unknown	6.46698	-0.474566
Glycolysis / Gluconeogenesis / TCA cycle	aldolase	Brassica/Grass	Drought	Luvisol	Zoopagomycota	Dimargaritomycetes	Unknown	6.46698	-0.474566
Glycolysis / Gluconeogenesis / TCA cycle	aldolase	Brassica/Grass	Drought	Luvisol	Zoopagomycota	Entomophthoromycetes	Unknown	6.46698	-0.474566
Glycolysis / Gluconeogenesis / TCA cycle	aldolase	Brassica/Grass	Drought	Luvisol	Zoopagomycota	Zoopagomycetes	Unknown	6.46698	-0.474566
Glycolysis / Gluconeogenesis / TCA cycle	aldolase	Brassica/Grass	Drought	Phaeozem	Blastocladiomycota	Blastocladiomycetes	Unknown	7.40458	-4.09585
Glycolysis / Gluconeogenesis / TCA cycle	aldolase	Brassica/Grass	Drought	Phaeozem	Chytridiomycota	Chytridiomycetes	Unknown	7.40458	-4.09585
Glycolysis / Gluconeogenesis / TCA cycle	aldolase	Brassica/Grass	Drought	Phaeozem	Chytridiomycota	Monoblepharidomycetes	Unknown	7.40458	-4.09585
Glycolysis / Gluconeogenesis / TCA cycle	aldolase	Brassica/Grass	Drought	Phaeozem	Zoopagomycota	Dimargaritomycetes	Unknown	7.40458	-4.09585
Glycolysis / Gluconeogenesis / TCA cycle	aldolase	Brassica/Grass	Drought	Phaeozem	Zoopagomycota	Entomophthoromycetes	Unknown	7.40458	-4.09585
Glycolysis / Gluconeogenesis / TCA cycle	aldolase	Brassica/Grass	Drought	Phaeozem	Zoopagomycota	Zoopagomycetes	Unknown	7.40458	-4.09585
Glycolysis / Gluconeogenesis / TCA cycle	aldolase	Brassica/Grass	Drought	Podzol	Blastocladiomycota	Blastocladiomycetes	Unknown	9.28734	-1.42455
Glycolysis / Gluconeogenesis / TCA cycle	aldolase	Brassica/Grass	Drought	Podzol	Chytridiomycota	Chytridiomycetes	Unknown	9.28734	-1.42455
Glycolysis / Gluconeogenesis / TCA cycle	aldolase	Brassica/Grass	Drought	Podzol	Chytridiomycota	Monoblepharidomycetes	Unknown	9.28734	-1.42455
Glycolysis / Gluconeogenesis / TCA cycle	aldolase	Brassica/Grass	Drought	Podzol	Zoopagomycota	Dimargaritomycetes	Unknown	9.28734	-1.42455
Glycolysis / Gluconeogenesis / TCA cycle	aldolase	Brassica/Grass	Drought	Podzol	Zoopagomycota	Entomophthoromycetes	Unknown	9.28734	-1.42455
Glycolysis / Gluconeogenesis / TCA cycle	aldolase	Brassica/Grass	Drought	Podzol	Zoopagomycota	Zoopagomycetes	Unknown	9.28734	-1.42455
Glycolysis / Gluconeogenesis / TCA cycle	aldolase	Fallow	Drought	Luvisol	Blastocladiomycota	Blastocladiomycetes	Unknown	6.39049	-0.18238
Glycolysis / Gluconeogenesis / TCA cycle	aldolase	Fallow	Drought	Luvisol	Chytridiomycota	Chytridiomycetes	Unknown	6.59584	0.723119
Glycolysis / Gluconeogenesis / TCA cycle	aldolase	Fallow	Drought	Luvisol	Chytridiomycota	Monoblepharidomycetes	Unknown	6.59584	0.723119
Glycolysis / Gluconeogenesis / TCA cycle	aldolase	Fallow	Drought	Luvisol	Zoopagomycota	Dimargaritomycetes	Unknown	6.59584	0.723119
Glycolysis / Gluconeogenesis / TCA cycle	aldolase	Fallow	Drought	Luvisol	Zoopagomycota	Entomophthoromycetes	Unknown	6.59584	0.723119
Glycolysis / Gluconeogenesis / TCA cycle	aldolase	Fallow	Drought	Luvisol	Zoopagomycota	Zoopagomycetes	Unknown	6.59584	0.723119
Glycolysis / Gluconeogenesis / TCA cycle	aldolase	Fallow	Drought	Phaeozem	Blastocladiomycota	Blastocladiomycetes	Unknown	9.16787	0.282842
Glycolysis / Gluconeogenesis / TCA cycle	aldolase	Fallow	Drought	Phaeozem	Chytridiomycota	Chytridiomycetes	Unknown	9.16787	0.282842
Glycolysis / Gluconeogenesis / TCA cycle	aldolase	Fallow	Drought	Phaeozem	Chytridiomycota	Monoblepharidomycetes	Unknown	9.16787	0.282842
Glycolysis / Gluconeogenesis / TCA cycle	aldolase	Fallow	Drought	Phaeozem	Zoopagomycota	Dimargaritomycetes	Unknown	9.16787	0.282842
Glycolysis / Gluconeogenesis / TCA cycle	aldolase	Fallow	Drought	Phaeozem	Zoopagomycota	Entomophthoromycetes	Unknown	9.16787	0.282842
Glycolysis / Gluconeogenesis / TCA cycle	aldolase	Fallow	Drought	Phaeozem	Zoopagomycota	Zoopagomycetes	Unknown	9.16787	0.282842
Glycolysis / Gluconeogenesis / TCA cycle	aldolase	Fallow	Drought	Podzol	Blastocladiomycota	Blastocladiomycetes	Unknown	7.58868	-0.729385
Glycolysis / Gluconeogenesis / TCA cycle	aldolase	Fallow	Drought	Podzol	Chytridiomycota	Chytridiomycetes	Unknown	7.58868	-0.729385
Glycolysis / Gluconeogenesis / TCA cycle	aldolase	Fallow	Drought	Podzol	Chytridiomycota	Monoblepharidomycetes	Unknown	7.58868	-0.729385
Glycolysis / Gluconeogenesis / TCA cycle	aldolase	Fallow	Drought	Podzol	Zoopagomycota	Dimargaritomycetes	Unknown	7.58868	-0.729385
Glycolysis / Gluconeogenesis / TCA cycle	aldolase	Fallow	Drought	Podzol	Zoopagomycota	Entomophthoromycetes	Unknown	7.58868	-0.729385
Glycolysis / Gluconeogenesis / TCA cycle	aldolase	Fallow	Drought	Podzol	Zoopagomycota	Zoopagomycetes	Unknown	7.58868	-0.729385
Glycolysis / Gluconeogenesis / TCA cycle	aldolase	Legume/Grass	Drought	Luvisol	Blastocladiomycota	Blastocladiomycetes	Unknown	6.4823	1.32435
Glycolysis / Gluconeogenesis / TCA cycle	aldolase	Legume/Grass	Drought	Luvisol	Chytridiomycota	Chytridiomycetes	Unknown	7.19213	1.69513
Glycolysis / Gluconeogenesis / TCA cycle	aldolase	Legume/Grass	Drought	Luvisol	Chytridiomycota	Monoblepharidomycetes	Unknown	7.19213	1.69513
Glycolysis / Gluconeogenesis / TCA cycle	aldolase	Legume/Grass	Drought	Luvisol	Zoopagomycota	Dimargaritomycetes	Unknown	7.19213	1.69513
Glycolysis / Gluconeogenesis / TCA cycle	aldolase	Legume/Grass	Drought	Luvisol	Zoopagomycota	Entomophthoromycetes	Unknown	7.19213	1.69513
Glycolysis / Gluconeogenesis / TCA cycle	aldolase	Legume/Grass	Drought	Luvisol	Zoopagomycota	Zoopagomycetes	Unknown	7.19213	1.69513
Glycolysis / Gluconeogenesis / TCA cycle	aldolase	Legume/Grass	Drought	Phaeozem	Blastocladiomycota	Blastocladiomycetes	Unknown	6.63185	-1.33687
Glycolysis / Gluconeogenesis / TCA cycle	aldolase	Legume/Grass	Drought	Phaeozem	Chytridiomycota	Chytridiomycetes	Unknown	6.63185	-1.33687
Glycolysis / Gluconeogenesis / TCA cycle	aldolase	Legume/Grass	Drought	Phaeozem	Chytridiomycota	Monoblepharidomycetes	Unknown	6.63185	-1.33687
Glycolysis / Gluconeogenesis / TCA cycle	aldolase	Legume/Grass	Drought	Phaeozem	Zoopagomycota	Dimargaritomycetes	Unknown	6.63185	-1.33687
Glycolysis / Gluconeogenesis / TCA cycle	aldolase	Legume/Grass	Drought	Phaeozem	Zoopagomycota	Entomophthoromycetes	Unknown	6.63185	-1.33687
Glycolysis / Gluconeogenesis / TCA cycle	aldolase	Legume/Grass	Drought	Phaeozem	Zoopagomycota	Zoopagomycetes	Unknown	6.63185	-1.33687
Glycolysis / Gluconeogenesis / TCA cycle	aldolase	Legume/Grass	Drought	Podzol	Blastocladiomycota	Blastocladiomycetes	Unknown	9.37168	1.55633
Glycolysis / Gluconeogenesis / TCA cycle	aldolase	Legume/Grass	Drought	Podzol	Chytridiomycota	Chytridiomycetes	Unknown	9.37168	1.55633
Glycolysis / Gluconeogenesis / TCA cycle	aldolase	Legume/Grass	Drought	Podzol	Chytridiomycota	Monoblepharidomycetes	Unknown	9.37168	1.55633
Glycolysis / Gluconeogenesis / TCA cycle	aldolase	Legume/Grass	Drought	Podzol	Zoopagomycota	Dimargaritomycetes	Unknown	9.37168	1.55633
Glycolysis / Gluconeogenesis / TCA cycle	aldolase	Legume/Grass	Drought	Podzol	Zoopagomycota	Entomophthoromycetes	Unknown	9.37168	1.55633
Glycolysis / Gluconeogenesis / TCA cycle	aldolase	Legume/Grass	Drought	Podzol	Zoopagomycota	Zoopagomycetes	Unknown	9.37168	1.55633
Glycolysis / Gluconeogenesis / TCA cycle	glucose-6-phosphate 1-epimerase	Brassica/Grass	Drought	Luvisol	Ascomycota	Eurotiomycetes	Pathotroph	5.02536	0.692591
Glycolysis / Gluconeogenesis / TCA cycle	glucose-6-phosphate 1-epimerase	Brassica/Grass	Drought	Luvisol	Ascomycota	Eurotiomycetes	Pathotroph-Saprotroph	5.02536	0.692591
Glycolysis / Gluconeogenesis / TCA cycle	glucose-6-phosphate 1-epimerase	Brassica/Grass	Drought	Luvisol	Ascomycota	Eurotiomycetes	Pathotroph-Saprotroph	5.02536	0.692591
Glycolysis / Gluconeogenesis / TCA cycle	glucose-6-phosphate 1-epimerase	Brassica/Grass	Drought	Luvisol	Ascomycota	Eurotiomycetes	Pathotroph-Saprotroph	5.02536	0.692591
Glycolysis / Gluconeogenesis / TCA cycle	glucose-6-phosphate 1-epimerase	Brassica/Grass	Drought	Luvisol	Ascomycota	Eurotiomycetes	Pathotroph-Saprotroph	5.02536	0.692591
Glycolysis / Gluconeogenesis / TCA cycle	glucose-6-phosphate 1-epimerase	Brassica/Grass	Drought	Luvisol	Ascomycota	Eurotiomycetes	Saprotroph	5.02536	0.692591
Glycolysis / Gluconeogenesis / TCA cycle	glucose-6-phosphate 1-epimerase	Fallow	Drought	Luvisol	Ascomycota	Eurotiomycetes	Pathotroph	4.90979	-1.02686
Glycolysis / Gluconeogenesis / TCA cycle	glucose-6-phosphate 1-epimerase	Fallow	Drought	Luvisol	Ascomycota	Eurotiomycetes	Pathotroph-Saprotroph	4.90979	-1.02686
Glycolysis / Gluconeogenesis / TCA cycle	glucose-6-phosphate 1-epimerase	Fallow	Drought	Luvisol	Ascomycota	Eurotiomycetes	Pathotroph-Saprotroph	4.90979	-1.02686
Glycolysis / Gluconeogenesis / TCA cycle	glucose-6-phosphate 1-epimerase	Fallow	Drought	Luvisol	Ascomycota	Eurotiomycetes	Pathotroph-Saprotroph	4.90979	-1.02686
Glycolysis / Gluconeogenesis / TCA cycle	glucose-6-phosphate 1-epimerase	Fallow	Drought	Luvisol	Ascomycota	Eurotiomycetes	Pathotroph-Saprotroph	4.90979	-1.02686
Glycolysis / Gluconeogenesis / TCA cycle	glucose-6-phosphate 1-epimerase	Fallow	Drought	Luvisol	Ascomycota	Eurotiomycetes	Saprotroph	4.90979	-1.02686
Glycolysis / Gluconeogenesis / TCA cycle	glucose-6-phosphate 1-epimerase	Legume/Grass	Drought	Luvisol	Ascomycota	Eurotiomycetes	Pathotroph	4.34333	-0.4959
Glycolysis / Gluconeogenesis / TCA cycle	glucose-6-phosphate 1-epimerase	Legume/Grass	Drought	Luvisol	Ascomycota	Eurotiomycetes	Pathotroph-Saprotroph	4.34333	-0.4959
Glycolysis / Gluconeogenesis / TCA cycle	glucose-6-phosphate 1-epimerase	Legume/Grass	Drought	Luvisol	Ascomycota	Eurotiomycetes	Pathotroph-Saprotroph	4.34333	-0.4959
Glycolysis / Gluconeogenesis / TCA cycle	glucose-6-phosphate 1-epimerase	Legume/Grass	Drought	Luvisol	Ascomycota	Eurotiomycetes	Pathotroph-Saprotroph	4.34333	-0.4959
Glycolysis / Gluconeogenesis / TCA cycle	glucose-6-phosphate 1-epimerase	Legume/Grass	Drought	Luvisol	Ascomycota	Eurotiomycetes	Pathotroph-Saprotroph	4.34333	-0.4959
Glycolysis / Gluconeogenesis / TCA cycle	glucose-6-phosphate 1-epimerase	Legume/Grass	Drought	Luvisol	Ascomycota	Eurotiomycetes	Saprotroph	4.34333	-0.4959
Glycolysis / Gluconeogenesis / TCA cycle	malate dehydrogenase	Brassica/Grass	Drought	Luvisol	Mucoromycota	Mucoromycetes	Pathotroph	9.1214	-0.419682
Glycolysis / Gluconeogenesis / TCA cycle	malate dehydrogenase	Brassica/Grass	Drought	Luvisol	Mucoromycota	Mucoromycetes	Pathotroph-Symbiotroph	9.1214	-0.419682
Glycolysis / Gluconeogenesis / TCA cycle	malate dehydrogenase	Brassica/Grass	Drought	Phaeozem	Mucoromycota	Mucoromycetes	Pathotroph	8.28627	2.25921
Glycolysis / Gluconeogenesis / TCA cycle	malate dehydrogenase	Brassica/Grass	Drought	Phaeozem	Mucoromycota	Mucoromycetes	Pathotroph-Symbiotroph	8.28627	2.25921
Glycolysis / Gluconeogenesis / TCA cycle	malate dehydrogenase	Brassica/Grass	Drought	Podzol	Mucoromycota	Mucoromycetes	Unknown	6.47867	0
Glycolysis / Gluconeogenesis / TCA cycle	malate dehydrogenase	Fallow	Drought	Luvisol	Mucoromycota	Mucoromycetes	Pathotroph	7.76416	0.865534
Glycolysis / Gluconeogenesis / TCA cycle	malate dehydrogenase	Fallow	Drought	Luvisol	Mucoromycota	Mucoromycetes	Pathotroph-Symbiotroph	7.76416	0.865534
Glycolysis / Gluconeogenesis / TCA cycle	malate dehydrogenase	Fallow	Drought	Phaeozem	Ascomycota	Eurotiomycetes	Unknown	9.60638	0
Glycolysis / Gluconeogenesis / TCA cycle	malate dehydrogenase	Fallow	Drought	Phaeozem	Mucoromycota	Mucoromycetes	Pathotroph	5.79422	2.01971
Glycolysis / Gluconeogenesis / TCA cycle	malate dehydrogenase	Fallow	Drought	Phaeozem	Mucoromycota	Mucoromycetes	Pathotroph-Symbiotroph	5.79422	2.01971
Glycolysis / Gluconeogenesis / TCA cycle	malate dehydrogenase	Fallow	Drought	Podzol	Mucoromycota	Mucoromycetes	Unknown	6.0176	0.69659
Glycolysis / Gluconeogenesis / TCA cycle	malate dehydrogenase	Legume/Grass	Drought	Luvisol	Mucoromycota	Mucoromycetes	Pathotroph	9.1718	-0.157184
Glycolysis / Gluconeogenesis / TCA cycle	malate dehydrogenase	Legume/Grass	Drought	Luvisol	Mucoromycota	Mucoromycetes	Pathotroph-Symbiotroph	9.1718	-0.157184
Glycolysis / Gluconeogenesis / TCA cycle	malate dehydrogenase	Legume/Grass	Drought	Phaeozem	Ascomycota	Eurotiomycetes	Unknown	10.4479	-0.100945
Glycolysis / Gluconeogenesis / TCA cycle	malate dehydrogenase	Legume/Grass	Drought	Phaeozem	Mucoromycota	Mucoromycetes	Pathotroph	10.2013	2.72813
Glycolysis / Gluconeogenesis / TCA cycle	malate dehydrogenase	Legume/Grass	Drought	Phaeozem	Mucoromycota	Mucoromycetes	Pathotroph-Symbiotroph	10.2013	2.72813
Glycolysis / Gluconeogenesis / TCA cycle	malate dehydrogenase	Legume/Grass	Drought	Podzol	Mucoromycota	Mucoromycetes	Pathotroph	6.46533	0
Glycolysis / Gluconeogenesis / TCA cycle	malate dehydrogenase	Legume/Grass	Drought	Podzol	Mucoromycota	Mucoromycetes	Pathotroph-Symbiotroph	6.46533	0
Glycolysis / Gluconeogenesis / TCA cycle	malate dehydrogenase	Legume/Grass	Drought	Podzol	Mucoromycota	Mucoromycetes	Unknown	4.93626	-1.74324
Methionine cycle / Transsulfuration pathway	O-acetylhomoserine (thiol)-lyase	Brassica/Grass	Drought	Podzol	Chytridiomycota	Monoblepharidomycetes	Unknown	4.51967	-1.42666
Methionine cycle / Transsulfuration pathway	O-acetylhomoserine (thiol)-lyase	Fallow	Drought	Podzol	Chytridiomycota	Monoblepharidomycetes	Unknown	3.20689	-1.20919
Methionine cycle / Transsulfuration pathway	O-acetylhomoserine (thiol)-lyase	Legume/Grass	Drought	Podzol	Chytridiomycota	Monoblepharidomycetes	Unknown	4.8919	-0.631364
Methionine cycle / Transsulfuration pathway	O-acetylhomoserine sulfhydrylase	Brassica/Grass	Drought	Podzol	Chytridiomycota	Monoblepharidomycetes	Unknown	4.51967	-1.42666
Methionine cycle / Transsulfuration pathway	O-acetylhomoserine sulfhydrylase	Fallow	Drought	Podzol	Chytridiomycota	Monoblepharidomycetes	Unknown	3.20689	-1.20919
Methionine cycle / Transsulfuration pathway	O-acetylhomoserine sulfhydrylase	Legume/Grass	Drought	Podzol	Chytridiomycota	Monoblepharidomycetes	Unknown	4.8919	-0.631364
Methionine cycle / Transsulfuration pathway	S-adenosylmethionine synthase	Brassica/Grass	Drought	Luvisol	Ascomycota	Pichiomycetes	Unknown	6.95463	-3.2978
Methionine cycle / Transsulfuration pathway	S-adenosylmethionine synthase	Brassica/Grass	Drought	Luvisol	Basidiomycota	Agaricomycetes	Unknown	5.70869	-0.0261801
Methionine cycle / Transsulfuration pathway	S-adenosylmethionine synthase	Brassica/Grass	Drought	Phaeozem	Ascomycota	Dipodascomycetes	Unknown	5.99201	-2.50946
Methionine cycle / Transsulfuration pathway	S-adenosylmethionine synthase	Brassica/Grass	Drought	Phaeozem	Ascomycota	Dothideomycetes	Unknown	5.99201	-2.50946
Methionine cycle / Transsulfuration pathway	S-adenosylmethionine synthase	Brassica/Grass	Drought	Phaeozem	Ascomycota	Eurotiomycetes	Pathotroph	5.99201	-2.50946
Methionine cycle / Transsulfuration pathway	S-adenosylmethionine synthase	Brassica/Grass	Drought	Phaeozem	Ascomycota	Eurotiomycetes	Pathotroph	5.99201	-2.50946
Methionine cycle / Transsulfuration pathway	S-adenosylmethionine synthase	Brassica/Grass	Drought	Phaeozem	Ascomycota	Eurotiomycetes	Pathotroph	5.99201	-2.50946
Methionine cycle / Transsulfuration pathway	S-adenosylmethionine synthase	Brassica/Grass	Drought	Phaeozem	Ascomycota	Eurotiomycetes	Pathotroph	5.99201	-2.50946
Methionine cycle / Transsulfuration pathway	S-adenosylmethionine synthase	Brassica/Grass	Drought	Phaeozem	Ascomycota	Eurotiomycetes	Pathotroph-Saprotroph	5.99201	-2.50946
Methionine cycle / Transsulfuration pathway	S-adenosylmethionine synthase	Brassica/Grass	Drought	Phaeozem	Ascomycota	Eurotiomycetes	Pathotroph-Saprotroph	5.99201	-2.50946
Methionine cycle / Transsulfuration pathway	S-adenosylmethionine synthase	Brassica/Grass	Drought	Phaeozem	Ascomycota	Eurotiomycetes	Pathotroph-Saprotroph	5.99201	-2.50946
Methionine cycle / Transsulfuration pathway	S-adenosylmethionine synthase	Brassica/Grass	Drought	Phaeozem	Ascomycota	Eurotiomycetes	Pathotroph-Saprotroph	5.99201	-2.50946
Methionine cycle / Transsulfuration pathway	S-adenosylmethionine synthase	Brassica/Grass	Drought	Phaeozem	Ascomycota	Eurotiomycetes	Saprotroph	5.99201	-2.50946
Methionine cycle / Transsulfuration pathway	S-adenosylmethionine synthase	Brassica/Grass	Drought	Phaeozem	Ascomycota	Eurotiomycetes	Symbiotroph	5.99201	-2.50946
Methionine cycle / Transsulfuration pathway	S-adenosylmethionine synthase	Brassica/Grass	Drought	Phaeozem	Ascomycota	Eurotiomycetes	Unknown	5.99201	-2.50946
Methionine cycle / Transsulfuration pathway	S-adenosylmethionine synthase	Brassica/Grass	Drought	Phaeozem	Ascomycota	Leotiomycetes	Unknown	5.99201	-2.50946
Methionine cycle / Transsulfuration pathway	S-adenosylmethionine synthase	Brassica/Grass	Drought	Phaeozem	Ascomycota	Lipomycetes	Unknown	5.99201	-2.50946
Methionine cycle / Transsulfuration pathway	S-adenosylmethionine synthase	Brassica/Grass	Drought	Phaeozem	Ascomycota	Neolectomycetes	Unknown	5.99201	-2.50946
Methionine cycle / Transsulfuration pathway	S-adenosylmethionine synthase	Brassica/Grass	Drought	Phaeozem	Ascomycota	Orbiliomycetes	Saprotroph	6.70492	0
Methionine cycle / Transsulfuration pathway	S-adenosylmethionine synthase	Brassica/Grass	Drought	Phaeozem	Ascomycota	Orbiliomycetes	Unknown	5.89016	-2.65639
Methionine cycle / Transsulfuration pathway	S-adenosylmethionine synthase	Brassica/Grass	Drought	Phaeozem	Ascomycota	Pichiomycetes	Saprotroph	5.99201	-2.50946
Methionine cycle / Transsulfuration pathway	S-adenosylmethionine synthase	Brassica/Grass	Drought	Phaeozem	Ascomycota	Pichiomycetes	Unknown	6.1063	-2.77251
Methionine cycle / Transsulfuration pathway	S-adenosylmethionine synthase	Brassica/Grass	Drought	Phaeozem	Ascomycota	Pneumocystomycetes	Unknown	5.99201	-2.50946
Methionine cycle / Transsulfuration pathway	S-adenosylmethionine synthase	Brassica/Grass	Drought	Phaeozem	Ascomycota	Saccharomycetes	Pathotroph	5.99201	-2.28096
Methionine cycle / Transsulfuration pathway	S-adenosylmethionine synthase	Brassica/Grass	Drought	Phaeozem	Ascomycota	Saccharomycetes	Saprotroph	5.27909	0
Methionine cycle / Transsulfuration pathway	S-adenosylmethionine synthase	Brassica/Grass	Drought	Phaeozem	Ascomycota	Saccharomycetes	Unknown	6.01029	-2.48866
Methionine cycle / Transsulfuration pathway	S-adenosylmethionine synthase	Brassica/Grass	Drought	Phaeozem	Ascomycota	Schizosaccharomycetes	Unknown	5.99201	-2.50946
Methionine cycle / Transsulfuration pathway	S-adenosylmethionine synthase	Brassica/Grass	Drought	Phaeozem	Ascomycota	Taphrinomycetes	Unknown	5.99201	-2.50946
Methionine cycle / Transsulfuration pathway	S-adenosylmethionine synthase	Brassica/Grass	Drought	Phaeozem	Ascomycota	Trigonopsidomycetes	Unknown	5.99201	-2.50946
Methionine cycle / Transsulfuration pathway	S-adenosylmethionine synthase	Brassica/Grass	Drought	Phaeozem	Basidiomycota	Agaricomycetes	Pathotroph	8.3151	1.94048
Methionine cycle / Transsulfuration pathway	S-adenosylmethionine synthase	Brassica/Grass	Drought	Phaeozem	Basidiomycota	Agaricomycetes	Pathotroph-Saprotroph	8.3151	1.94048
Methionine cycle / Transsulfuration pathway	S-adenosylmethionine synthase	Brassica/Grass	Drought	Phaeozem	Basidiomycota	Agaricomycetes	Pathotroph-Saprotroph	8.3151	1.94048
Methionine cycle / Transsulfuration pathway	S-adenosylmethionine synthase	Brassica/Grass	Drought	Phaeozem	Basidiomycota	Agaricomycetes	Pathotroph-Saprotroph	8.49885	-0.189296
Methionine cycle / Transsulfuration pathway	S-adenosylmethionine synthase	Brassica/Grass	Drought	Phaeozem	Basidiomycota	Agaricomycetes	Pathotroph-Saprotroph	8.3151	1.94048
Methionine cycle / Transsulfuration pathway	S-adenosylmethionine synthase	Brassica/Grass	Drought	Phaeozem	Basidiomycota	Agaricomycetes	Saprotroph	8.49885	-2.58416
Methionine cycle / Transsulfuration pathway	S-adenosylmethionine synthase	Brassica/Grass	Drought	Phaeozem	Basidiomycota	Agaricomycetes	Symbiotroph	8.3151	-2.84926
Methionine cycle / Transsulfuration pathway	S-adenosylmethionine synthase	Brassica/Grass	Drought	Phaeozem	Basidiomycota	Agaricomycetes	Symbiotroph	8.3151	-2.84926
Methionine cycle / Transsulfuration pathway	S-adenosylmethionine synthase	Brassica/Grass	Drought	Phaeozem	Basidiomycota	Agaricomycetes	Symbiotroph	8.49885	-2.58416
Methionine cycle / Transsulfuration pathway	S-adenosylmethionine synthase	Brassica/Grass	Drought	Phaeozem	Basidiomycota	Agaricomycetes	Symbiotroph	8.3151	0
Methionine cycle / Transsulfuration pathway	S-adenosylmethionine synthase	Brassica/Grass	Drought	Phaeozem	Basidiomycota	Agaricomycetes	Unknown	8.50387	-0.117327
Methionine cycle / Transsulfuration pathway	S-adenosylmethionine synthase	Brassica/Grass	Drought	Phaeozem	Basidiomycota	Dacrymycetes	Unknown	8.49885	-0.189296
Methionine cycle / Transsulfuration pathway	S-adenosylmethionine synthase	Brassica/Grass	Drought	Phaeozem	Basidiomycota	Exobasidiomycetes	Unknown	8.49885	-0.189296
Methionine cycle / Transsulfuration pathway	S-adenosylmethionine synthase	Brassica/Grass	Drought	Phaeozem	Basidiomycota	Malasseziomycetes	Pathotroph	8.49885	-0.189296
Methionine cycle / Transsulfuration pathway	S-adenosylmethionine synthase	Brassica/Grass	Drought	Phaeozem	Basidiomycota	Microbotryomycetes	Unknown	8.49885	-0.189296
Methionine cycle / Transsulfuration pathway	S-adenosylmethionine synthase	Brassica/Grass	Drought	Phaeozem	Basidiomycota	Pucciniomycetes	Unknown	8.49885	-0.189296
Methionine cycle / Transsulfuration pathway	S-adenosylmethionine synthase	Brassica/Grass	Drought	Phaeozem	Basidiomycota	Tremellomycetes	Pathotroph	8.49885	-0.189296
Methionine cycle / Transsulfuration pathway	S-adenosylmethionine synthase	Brassica/Grass	Drought	Phaeozem	Basidiomycota	Tremellomycetes	Unknown	8.49885	-0.189296
Methionine cycle / Transsulfuration pathway	S-adenosylmethionine synthase	Brassica/Grass	Drought	Phaeozem	Basidiomycota	Ustilaginomycetes	Pathotroph	8.49885	-0.189296
Methionine cycle / Transsulfuration pathway	S-adenosylmethionine synthase	Brassica/Grass	Drought	Phaeozem	Basidiomycota	Ustilaginomycetes	Pathotroph	8.49885	-0.189296
Methionine cycle / Transsulfuration pathway	S-adenosylmethionine synthase	Brassica/Grass	Drought	Phaeozem	Basidiomycota	Ustilaginomycetes	Unknown	8.49885	-0.189296
Methionine cycle / Transsulfuration pathway	S-adenosylmethionine synthase	Brassica/Grass	Drought	Phaeozem	Basidiomycota	Wallemiomycetes	Unknown	8.49885	-0.189296
Methionine cycle / Transsulfuration pathway	S-adenosylmethionine synthase	Brassica/Grass	Drought	Phaeozem	Chytridiomycota	Neocallimastigomycetes	Unknown	8.49885	-0.189296
Methionine cycle / Transsulfuration pathway	S-adenosylmethionine synthase	Brassica/Grass	Drought	Phaeozem	Mucoromycota	Endogonomycetes	Unknown	8.49885	-0.189296
Methionine cycle / Transsulfuration pathway	S-adenosylmethionine synthase	Brassica/Grass	Drought	Phaeozem	Zoopagomycota	Harpellomycetes	Unknown	8.49885	-0.189296
Methionine cycle / Transsulfuration pathway	S-adenosylmethionine synthase	Brassica/Grass	Drought	Podzol	Ascomycota	Dipodascomycetes	Unknown	11.9915	1.84306
Methionine cycle / Transsulfuration pathway	S-adenosylmethionine synthase	Brassica/Grass	Drought	Podzol	Ascomycota	Dothideomycetes	Unknown	11.9915	1.84306
Methionine cycle / Transsulfuration pathway	S-adenosylmethionine synthase	Brassica/Grass	Drought	Podzol	Ascomycota	Eurotiomycetes	Pathotroph	11.9915	1.84306
Methionine cycle / Transsulfuration pathway	S-adenosylmethionine synthase	Brassica/Grass	Drought	Podzol	Ascomycota	Eurotiomycetes	Pathotroph	12.4071	2.57535
Methionine cycle / Transsulfuration pathway	S-adenosylmethionine synthase	Brassica/Grass	Drought	Podzol	Ascomycota	Eurotiomycetes	Pathotroph	11.9915	1.84306
Methionine cycle / Transsulfuration pathway	S-adenosylmethionine synthase	Brassica/Grass	Drought	Podzol	Ascomycota	Eurotiomycetes	Pathotroph	11.9915	1.84306
Methionine cycle / Transsulfuration pathway	S-adenosylmethionine synthase	Brassica/Grass	Drought	Podzol	Ascomycota	Eurotiomycetes	Pathotroph-Saprotroph	11.9915	1.84306
Methionine cycle / Transsulfuration pathway	S-adenosylmethionine synthase	Brassica/Grass	Drought	Podzol	Ascomycota	Eurotiomycetes	Pathotroph-Saprotroph	11.9915	1.84306
Methionine cycle / Transsulfuration pathway	S-adenosylmethionine synthase	Brassica/Grass	Drought	Podzol	Ascomycota	Eurotiomycetes	Pathotroph-Saprotroph	11.9915	1.84306
Methionine cycle / Transsulfuration pathway	S-adenosylmethionine synthase	Brassica/Grass	Drought	Podzol	Ascomycota	Eurotiomycetes	Pathotroph-Saprotroph	11.9915	1.84306
Methionine cycle / Transsulfuration pathway	S-adenosylmethionine synthase	Brassica/Grass	Drought	Podzol	Ascomycota	Eurotiomycetes	Saprotroph	11.9915	1.84306
Methionine cycle / Transsulfuration pathway	S-adenosylmethionine synthase	Brassica/Grass	Drought	Podzol	Ascomycota	Eurotiomycetes	Symbiotroph	11.9915	1.84306
Methionine cycle / Transsulfuration pathway	S-adenosylmethionine synthase	Brassica/Grass	Drought	Podzol	Ascomycota	Eurotiomycetes	Unknown	11.7421	1.40368
Methionine cycle / Transsulfuration pathway	S-adenosylmethionine synthase	Brassica/Grass	Drought	Podzol	Ascomycota	Leotiomycetes	Unknown	11.9915	1.84306
Methionine cycle / Transsulfuration pathway	S-adenosylmethionine synthase	Brassica/Grass	Drought	Podzol	Ascomycota	Lipomycetes	Unknown	11.9915	1.84306
Methionine cycle / Transsulfuration pathway	S-adenosylmethionine synthase	Brassica/Grass	Drought	Podzol	Ascomycota	Neolectomycetes	Unknown	11.9915	1.84306
Methionine cycle / Transsulfuration pathway	S-adenosylmethionine synthase	Brassica/Grass	Drought	Podzol	Ascomycota	Orbiliomycetes	Unknown	11.9915	1.84306
Methionine cycle / Transsulfuration pathway	S-adenosylmethionine synthase	Brassica/Grass	Drought	Podzol	Ascomycota	Pichiomycetes	Saprotroph	11.9915	1.84306
Methionine cycle / Transsulfuration pathway	S-adenosylmethionine synthase	Brassica/Grass	Drought	Podzol	Ascomycota	Pichiomycetes	Unknown	11.9668	1.71106
Methionine cycle / Transsulfuration pathway	S-adenosylmethionine synthase	Brassica/Grass	Drought	Podzol	Ascomycota	Pneumocystomycetes	Unknown	11.9915	1.84306
Methionine cycle / Transsulfuration pathway	S-adenosylmethionine synthase	Brassica/Grass	Drought	Podzol	Ascomycota	Saccharomycetes	Saprotroph	10.7447	0
Methionine cycle / Transsulfuration pathway	S-adenosylmethionine synthase	Brassica/Grass	Drought	Podzol	Ascomycota	Saccharomycetes	Unknown	12.0219	1.88693
Methionine cycle / Transsulfuration pathway	S-adenosylmethionine synthase	Brassica/Grass	Drought	Podzol	Ascomycota	Schizosaccharomycetes	Unknown	11.9915	1.84306
Methionine cycle / Transsulfuration pathway	S-adenosylmethionine synthase	Brassica/Grass	Drought	Podzol	Ascomycota	Taphrinomycetes	Unknown	11.9915	1.84306
Methionine cycle / Transsulfuration pathway	S-adenosylmethionine synthase	Brassica/Grass	Drought	Podzol	Ascomycota	Trigonopsidomycetes	Unknown	11.9915	1.84306
Methionine cycle / Transsulfuration pathway	S-adenosylmethionine synthase	Brassica/Grass	Drought	Podzol	Basidiomycota	Agaricomycetes	Pathotroph-Saprotroph	11.6361	0
Methionine cycle / Transsulfuration pathway	S-adenosylmethionine synthase	Brassica/Grass	Drought	Podzol	Basidiomycota	Agaricomycetes	Saprotroph	11.6361	0
Methionine cycle / Transsulfuration pathway	S-adenosylmethionine synthase	Brassica/Grass	Drought	Podzol	Basidiomycota	Agaricomycetes	Saprotroph	10.2439	-1.47489
Methionine cycle / Transsulfuration pathway	S-adenosylmethionine synthase	Brassica/Grass	Drought	Podzol	Basidiomycota	Agaricomycetes	Saprotroph	7.45938	-5.49209
Methionine cycle / Transsulfuration pathway	S-adenosylmethionine synthase	Brassica/Grass	Drought	Podzol	Basidiomycota	Agaricomycetes	Saprotroph	9.54776	-2.47919
Methionine cycle / Transsulfuration pathway	S-adenosylmethionine synthase	Brassica/Grass	Drought	Podzol	Basidiomycota	Agaricomycetes	Saprotroph	9.54776	0
Methionine cycle / Transsulfuration pathway	S-adenosylmethionine synthase	Brassica/Grass	Drought	Podzol	Basidiomycota	Agaricomycetes	Symbiotroph	11.6361	0
Methionine cycle / Transsulfuration pathway	S-adenosylmethionine synthase	Brassica/Grass	Drought	Podzol	Basidiomycota	Agaricomycetes	Symbiotroph	11.6361	0
Methionine cycle / Transsulfuration pathway	S-adenosylmethionine synthase	Brassica/Grass	Drought	Podzol	Basidiomycota	Agaricomycetes	Symbiotroph	11.6361	4.46519
Methionine cycle / Transsulfuration pathway	S-adenosylmethionine synthase	Brassica/Grass	Drought	Podzol	Basidiomycota	Agaricomycetes	Unknown	9.52531	1.4823
Methionine cycle / Transsulfuration pathway	S-adenosylmethionine synthase	Brassica/Grass	Drought	Podzol	Basidiomycota	Dacrymycetes	Unknown	9.54776	1.45229
Methionine cycle / Transsulfuration pathway	S-adenosylmethionine synthase	Brassica/Grass	Drought	Podzol	Basidiomycota	Exobasidiomycetes	Unknown	9.54776	1.45229
Methionine cycle / Transsulfuration pathway	S-adenosylmethionine synthase	Brassica/Grass	Drought	Podzol	Basidiomycota	Malasseziomycetes	Pathotroph	9.54776	1.45229
Methionine cycle / Transsulfuration pathway	S-adenosylmethionine synthase	Brassica/Grass	Drought	Podzol	Basidiomycota	Microbotryomycetes	Unknown	9.54776	1.45229
Methionine cycle / Transsulfuration pathway	S-adenosylmethionine synthase	Brassica/Grass	Drought	Podzol	Basidiomycota	Pucciniomycetes	Unknown	9.54776	1.45229
Methionine cycle / Transsulfuration pathway	S-adenosylmethionine synthase	Brassica/Grass	Drought	Podzol	Basidiomycota	Tremellomycetes	Pathotroph	9.54776	1.45229
Methionine cycle / Transsulfuration pathway	S-adenosylmethionine synthase	Brassica/Grass	Drought	Podzol	Basidiomycota	Tremellomycetes	Pathotroph	11.6361	0
Methionine cycle / Transsulfuration pathway	S-adenosylmethionine synthase	Brassica/Grass	Drought	Podzol	Basidiomycota	Tremellomycetes	Pathotroph	11.6361	0
Methionine cycle / Transsulfuration pathway	S-adenosylmethionine synthase	Brassica/Grass	Drought	Podzol	Basidiomycota	Tremellomycetes	Pathotroph	11.6361	0
Methionine cycle / Transsulfuration pathway	S-adenosylmethionine synthase	Brassica/Grass	Drought	Podzol	Basidiomycota	Tremellomycetes	Unknown	9.45696	1.32129
Methionine cycle / Transsulfuration pathway	S-adenosylmethionine synthase	Brassica/Grass	Drought	Podzol	Basidiomycota	Ustilaginomycetes	Unknown	9.54776	1.45229
Methionine cycle / Transsulfuration pathway	S-adenosylmethionine synthase	Brassica/Grass	Drought	Podzol	Basidiomycota	Wallemiomycetes	Unknown	9.54776	1.45229
Methionine cycle / Transsulfuration pathway	S-adenosylmethionine synthase	Brassica/Grass	Drought	Podzol	Chytridiomycota	Neocallimastigomycetes	Unknown	9.54776	1.45229
Methionine cycle / Transsulfuration pathway	S-adenosylmethionine synthase	Brassica/Grass	Drought	Podzol	Mucoromycota	Endogonomycetes	Unknown	9.54776	1.45229
Methionine cycle / Transsulfuration pathway	S-adenosylmethionine synthase	Brassica/Grass	Drought	Podzol	Mucoromycota	Mortierellomycetes	Unknown	7.96661	2.70938
Methionine cycle / Transsulfuration pathway	S-adenosylmethionine synthase	Brassica/Grass	Drought	Podzol	Mucoromycota	Mucoromycetes	Unknown	7.96661	2.70938
Methionine cycle / Transsulfuration pathway	S-adenosylmethionine synthase	Brassica/Grass	Drought	Podzol	Zoopagomycota	Harpellomycetes	Unknown	9.54776	1.45229
Methionine cycle / Transsulfuration pathway	S-adenosylmethionine synthase	Fallow	Drought	Luvisol	Ascomycota	Pichiomycetes	Unknown	7.61431	-0.141082
Methionine cycle / Transsulfuration pathway	S-adenosylmethionine synthase	Fallow	Drought	Luvisol	Basidiomycota	Agaricomycetes	Unknown	5.84668	1.59199
Methionine cycle / Transsulfuration pathway	S-adenosylmethionine synthase	Fallow	Drought	Phaeozem	Ascomycota	Dipodascomycetes	Unknown	5.82068	0.151067
Methionine cycle / Transsulfuration pathway	S-adenosylmethionine synthase	Fallow	Drought	Phaeozem	Ascomycota	Dothideomycetes	Unknown	5.82068	0.151067
Methionine cycle / Transsulfuration pathway	S-adenosylmethionine synthase	Fallow	Drought	Phaeozem	Ascomycota	Eurotiomycetes	Pathotroph	6.38992	0.972296
Methionine cycle / Transsulfuration pathway	S-adenosylmethionine synthase	Fallow	Drought	Phaeozem	Ascomycota	Eurotiomycetes	Pathotroph	5.82068	0.151067
Methionine cycle / Transsulfuration pathway	S-adenosylmethionine synthase	Fallow	Drought	Phaeozem	Ascomycota	Eurotiomycetes	Pathotroph	5.82068	0.151067
Methionine cycle / Transsulfuration pathway	S-adenosylmethionine synthase	Fallow	Drought	Phaeozem	Ascomycota	Eurotiomycetes	Pathotroph	5.82068	0.151067
Methionine cycle / Transsulfuration pathway	S-adenosylmethionine synthase	Fallow	Drought	Phaeozem	Ascomycota	Eurotiomycetes	Pathotroph-Saprotroph	6.38992	0.972296
Methionine cycle / Transsulfuration pathway	S-adenosylmethionine synthase	Fallow	Drought	Phaeozem	Ascomycota	Eurotiomycetes	Pathotroph-Saprotroph	6.38992	0.972296
Methionine cycle / Transsulfuration pathway	S-adenosylmethionine synthase	Fallow	Drought	Phaeozem	Ascomycota	Eurotiomycetes	Pathotroph-Saprotroph	6.38992	0.972296
Methionine cycle / Transsulfuration pathway	S-adenosylmethionine synthase	Fallow	Drought	Phaeozem	Ascomycota	Eurotiomycetes	Pathotroph-Saprotroph	6.38992	0.972296
Methionine cycle / Transsulfuration pathway	S-adenosylmethionine synthase	Fallow	Drought	Phaeozem	Ascomycota	Eurotiomycetes	Saprotroph	6.38992	0.972296
Methionine cycle / Transsulfuration pathway	S-adenosylmethionine synthase	Fallow	Drought	Phaeozem	Ascomycota	Eurotiomycetes	Symbiotroph	5.82068	0.151067
Methionine cycle / Transsulfuration pathway	S-adenosylmethionine synthase	Fallow	Drought	Phaeozem	Ascomycota	Eurotiomycetes	Unknown	5.73936	0.0337482
Methionine cycle / Transsulfuration pathway	S-adenosylmethionine synthase	Fallow	Drought	Phaeozem	Ascomycota	Leotiomycetes	Unknown	5.82068	0.151067
Methionine cycle / Transsulfuration pathway	S-adenosylmethionine synthase	Fallow	Drought	Phaeozem	Ascomycota	Lipomycetes	Unknown	5.82068	0.151067
Methionine cycle / Transsulfuration pathway	S-adenosylmethionine synthase	Fallow	Drought	Phaeozem	Ascomycota	Neolectomycetes	Unknown	5.82068	0.151067
Methionine cycle / Transsulfuration pathway	S-adenosylmethionine synthase	Fallow	Drought	Phaeozem	Ascomycota	Orbiliomycetes	Saprotroph	5.25145	0
Methionine cycle / Transsulfuration pathway	S-adenosylmethionine synthase	Fallow	Drought	Phaeozem	Ascomycota	Orbiliomycetes	Unknown	5.902	0.268385
Methionine cycle / Transsulfuration pathway	S-adenosylmethionine synthase	Fallow	Drought	Phaeozem	Ascomycota	Pichiomycetes	Saprotroph	6.38992	0.972296
Methionine cycle / Transsulfuration pathway	S-adenosylmethionine synthase	Fallow	Drought	Phaeozem	Ascomycota	Pichiomycetes	Unknown	5.93148	0.0220572
Methionine cycle / Transsulfuration pathway	S-adenosylmethionine synthase	Fallow	Drought	Phaeozem	Ascomycota	Pneumocystomycetes	Unknown	5.82068	0.151067
Methionine cycle / Transsulfuration pathway	S-adenosylmethionine synthase	Fallow	Drought	Phaeozem	Ascomycota	Saccharomycetes	Pathotroph	5.25145	-2.40618
Methionine cycle / Transsulfuration pathway	S-adenosylmethionine synthase	Fallow	Drought	Phaeozem	Ascomycota	Saccharomycetes	Saprotroph	5.25145	0
Methionine cycle / Transsulfuration pathway	S-adenosylmethionine synthase	Fallow	Drought	Phaeozem	Ascomycota	Saccharomycetes	Unknown	5.84915	0.23447
Methionine cycle / Transsulfuration pathway	S-adenosylmethionine synthase	Fallow	Drought	Phaeozem	Ascomycota	Schizosaccharomycetes	Unknown	5.82068	0.151067
Methionine cycle / Transsulfuration pathway	S-adenosylmethionine synthase	Fallow	Drought	Phaeozem	Ascomycota	Taphrinomycetes	Unknown	5.82068	1.88709
Methionine cycle / Transsulfuration pathway	S-adenosylmethionine synthase	Fallow	Drought	Phaeozem	Ascomycota	Trigonopsidomycetes	Unknown	5.82068	0.151067
Methionine cycle / Transsulfuration pathway	S-adenosylmethionine synthase	Fallow	Drought	Phaeozem	Basidiomycota	Agaricomycetes	Pathotroph	8.41844	0
Methionine cycle / Transsulfuration pathway	S-adenosylmethionine synthase	Fallow	Drought	Phaeozem	Basidiomycota	Agaricomycetes	Pathotroph-Saprotroph	8.41844	0
Methionine cycle / Transsulfuration pathway	S-adenosylmethionine synthase	Fallow	Drought	Phaeozem	Basidiomycota	Agaricomycetes	Pathotroph-Saprotroph	8.41844	0
Methionine cycle / Transsulfuration pathway	S-adenosylmethionine synthase	Fallow	Drought	Phaeozem	Basidiomycota	Agaricomycetes	Pathotroph-Saprotroph	7.31873	0.52687
Methionine cycle / Transsulfuration pathway	S-adenosylmethionine synthase	Fallow	Drought	Phaeozem	Basidiomycota	Agaricomycetes	Pathotroph-Saprotroph	8.41844	0
Methionine cycle / Transsulfuration pathway	S-adenosylmethionine synthase	Fallow	Drought	Phaeozem	Basidiomycota	Agaricomycetes	Saprotroph	6.21902	-1.05967
Methionine cycle / Transsulfuration pathway	S-adenosylmethionine synthase	Fallow	Drought	Phaeozem	Basidiomycota	Agaricomycetes	Saprotroph	6.21902	-1.05967
Methionine cycle / Transsulfuration pathway	S-adenosylmethionine synthase	Fallow	Drought	Phaeozem	Basidiomycota	Agaricomycetes	Symbiotroph	6.21902	0
Methionine cycle / Transsulfuration pathway	S-adenosylmethionine synthase	Fallow	Drought	Phaeozem	Basidiomycota	Agaricomycetes	Symbiotroph	6.21902	0
Methionine cycle / Transsulfuration pathway	S-adenosylmethionine synthase	Fallow	Drought	Phaeozem	Basidiomycota	Agaricomycetes	Symbiotroph	7.31873	-0.381351
Methionine cycle / Transsulfuration pathway	S-adenosylmethionine synthase	Fallow	Drought	Phaeozem	Basidiomycota	Agaricomycetes	Unknown	7.33055	0.0826114
Methionine cycle / Transsulfuration pathway	S-adenosylmethionine synthase	Fallow	Drought	Phaeozem	Basidiomycota	Dacrymycetes	Unknown	7.31873	0.0727599
Methionine cycle / Transsulfuration pathway	S-adenosylmethionine synthase	Fallow	Drought	Phaeozem	Basidiomycota	Exobasidiomycetes	Unknown	7.31873	0.0727599
Methionine cycle / Transsulfuration pathway	S-adenosylmethionine synthase	Fallow	Drought	Phaeozem	Basidiomycota	Malasseziomycetes	Pathotroph	7.31873	0.0727599
Methionine cycle / Transsulfuration pathway	S-adenosylmethionine synthase	Fallow	Drought	Phaeozem	Basidiomycota	Microbotryomycetes	Unknown	7.31873	0.0727599
Methionine cycle / Transsulfuration pathway	S-adenosylmethionine synthase	Fallow	Drought	Phaeozem	Basidiomycota	Pucciniomycetes	Unknown	7.31873	0.0727599
Methionine cycle / Transsulfuration pathway	S-adenosylmethionine synthase	Fallow	Drought	Phaeozem	Basidiomycota	Tremellomycetes	Unknown	7.31873	0.0545955
Methionine cycle / Transsulfuration pathway	S-adenosylmethionine synthase	Fallow	Drought	Phaeozem	Basidiomycota	Ustilaginomycetes	Pathotroph	6.21902	-1.05967
Methionine cycle / Transsulfuration pathway	S-adenosylmethionine synthase	Fallow	Drought	Phaeozem	Basidiomycota	Ustilaginomycetes	Pathotroph	6.21902	-1.05967
Methionine cycle / Transsulfuration pathway	S-adenosylmethionine synthase	Fallow	Drought	Phaeozem	Basidiomycota	Ustilaginomycetes	Unknown	7.4187	0.175708
Methionine cycle / Transsulfuration pathway	S-adenosylmethionine synthase	Fallow	Drought	Phaeozem	Basidiomycota	Wallemiomycetes	Unknown	7.31873	0.0727599
Methionine cycle / Transsulfuration pathway	S-adenosylmethionine synthase	Fallow	Drought	Phaeozem	Chytridiomycota	Neocallimastigomycetes	Unknown	7.31873	0.0727599
Methionine cycle / Transsulfuration pathway	S-adenosylmethionine synthase	Fallow	Drought	Phaeozem	Mucoromycota	Endogonomycetes	Unknown	7.31873	0.0727599
Methionine cycle / Transsulfuration pathway	S-adenosylmethionine synthase	Fallow	Drought	Phaeozem	Zoopagomycota	Harpellomycetes	Unknown	7.31873	0.0727599
Methionine cycle / Transsulfuration pathway	S-adenosylmethionine synthase	Fallow	Drought	Podzol	Ascomycota	Dipodascomycetes	Unknown	10.824	-2.60492
Methionine cycle / Transsulfuration pathway	S-adenosylmethionine synthase	Fallow	Drought	Podzol	Ascomycota	Dothideomycetes	Unknown	10.824	-2.60492
Methionine cycle / Transsulfuration pathway	S-adenosylmethionine synthase	Fallow	Drought	Podzol	Ascomycota	Eurotiomycetes	Pathotroph	10.824	-2.60492
Methionine cycle / Transsulfuration pathway	S-adenosylmethionine synthase	Fallow	Drought	Podzol	Ascomycota	Eurotiomycetes	Pathotroph	10.824	-2.60492
Methionine cycle / Transsulfuration pathway	S-adenosylmethionine synthase	Fallow	Drought	Podzol	Ascomycota	Eurotiomycetes	Pathotroph	10.824	-2.60492
Methionine cycle / Transsulfuration pathway	S-adenosylmethionine synthase	Fallow	Drought	Podzol	Ascomycota	Eurotiomycetes	Pathotroph	10.824	-2.60492
Methionine cycle / Transsulfuration pathway	S-adenosylmethionine synthase	Fallow	Drought	Podzol	Ascomycota	Eurotiomycetes	Pathotroph-Saprotroph	10.824	-2.60492
Methionine cycle / Transsulfuration pathway	S-adenosylmethionine synthase	Fallow	Drought	Podzol	Ascomycota	Eurotiomycetes	Pathotroph-Saprotroph	10.824	-2.60492
Methionine cycle / Transsulfuration pathway	S-adenosylmethionine synthase	Fallow	Drought	Podzol	Ascomycota	Eurotiomycetes	Pathotroph-Saprotroph	10.824	-2.60492
Methionine cycle / Transsulfuration pathway	S-adenosylmethionine synthase	Fallow	Drought	Podzol	Ascomycota	Eurotiomycetes	Pathotroph-Saprotroph	10.824	-2.60492
Methionine cycle / Transsulfuration pathway	S-adenosylmethionine synthase	Fallow	Drought	Podzol	Ascomycota	Eurotiomycetes	Saprotroph	10.824	-2.60492
Methionine cycle / Transsulfuration pathway	S-adenosylmethionine synthase	Fallow	Drought	Podzol	Ascomycota	Eurotiomycetes	Symbiotroph	10.824	-2.60492
Methionine cycle / Transsulfuration pathway	S-adenosylmethionine synthase	Fallow	Drought	Podzol	Ascomycota	Eurotiomycetes	Unknown	10.824	-2.60492
Methionine cycle / Transsulfuration pathway	S-adenosylmethionine synthase	Fallow	Drought	Podzol	Ascomycota	Leotiomycetes	Unknown	10.824	-2.60492
Methionine cycle / Transsulfuration pathway	S-adenosylmethionine synthase	Fallow	Drought	Podzol	Ascomycota	Lipomycetes	Unknown	10.824	-2.60492
Methionine cycle / Transsulfuration pathway	S-adenosylmethionine synthase	Fallow	Drought	Podzol	Ascomycota	Neolectomycetes	Unknown	10.824	-2.60492
Methionine cycle / Transsulfuration pathway	S-adenosylmethionine synthase	Fallow	Drought	Podzol	Ascomycota	Orbiliomycetes	Saprotroph	10.6054	-2.38589
Methionine cycle / Transsulfuration pathway	S-adenosylmethionine synthase	Fallow	Drought	Podzol	Ascomycota	Orbiliomycetes	Unknown	10.8552	-2.63621
Methionine cycle / Transsulfuration pathway	S-adenosylmethionine synthase	Fallow	Drought	Podzol	Ascomycota	Pichiomycetes	Saprotroph	10.824	-2.60492
Methionine cycle / Transsulfuration pathway	S-adenosylmethionine synthase	Fallow	Drought	Podzol	Ascomycota	Pichiomycetes	Unknown	10.8411	-2.30846
Methionine cycle / Transsulfuration pathway	S-adenosylmethionine synthase	Fallow	Drought	Podzol	Ascomycota	Pneumocystomycetes	Unknown	10.824	-2.60492
Methionine cycle / Transsulfuration pathway	S-adenosylmethionine synthase	Fallow	Drought	Podzol	Ascomycota	Saccharomycetes	Unknown	10.824	-2.60492
Methionine cycle / Transsulfuration pathway	S-adenosylmethionine synthase	Fallow	Drought	Podzol	Ascomycota	Schizosaccharomycetes	Unknown	10.824	-2.60492
Methionine cycle / Transsulfuration pathway	S-adenosylmethionine synthase	Fallow	Drought	Podzol	Ascomycota	Taphrinomycetes	Unknown	10.824	-2.60492
Methionine cycle / Transsulfuration pathway	S-adenosylmethionine synthase	Fallow	Drought	Podzol	Ascomycota	Trigonopsidomycetes	Unknown	10.824	-2.60492
Methionine cycle / Transsulfuration pathway	S-adenosylmethionine synthase	Fallow	Drought	Podzol	Basidiomycota	Agaricomycetes	Pathotroph	9.63268	-2.34998
Methionine cycle / Transsulfuration pathway	S-adenosylmethionine synthase	Fallow	Drought	Podzol	Basidiomycota	Agaricomycetes	Pathotroph-Saprotroph	9.63268	-2.34998
Methionine cycle / Transsulfuration pathway	S-adenosylmethionine synthase	Fallow	Drought	Podzol	Basidiomycota	Agaricomycetes	Pathotroph-Saprotroph	9.63268	-2.34998
Methionine cycle / Transsulfuration pathway	S-adenosylmethionine synthase	Fallow	Drought	Podzol	Basidiomycota	Agaricomycetes	Pathotroph-Saprotroph	9.33416	0
Methionine cycle / Transsulfuration pathway	S-adenosylmethionine synthase	Fallow	Drought	Podzol	Basidiomycota	Agaricomycetes	Pathotroph-Saprotroph	9.63268	-2.34998
Methionine cycle / Transsulfuration pathway	S-adenosylmethionine synthase	Fallow	Drought	Podzol	Basidiomycota	Agaricomycetes	Saprotroph	9.33416	-2.78065
Methionine cycle / Transsulfuration pathway	S-adenosylmethionine synthase	Fallow	Drought	Podzol	Basidiomycota	Agaricomycetes	Saprotroph	9.63268	0
Methionine cycle / Transsulfuration pathway	S-adenosylmethionine synthase	Fallow	Drought	Podzol	Basidiomycota	Agaricomycetes	Saprotroph	9.33416	-2.78065
Methionine cycle / Transsulfuration pathway	S-adenosylmethionine synthase	Fallow	Drought	Podzol	Basidiomycota	Agaricomycetes	Saprotroph	9.33416	-2.78065
Methionine cycle / Transsulfuration pathway	S-adenosylmethionine synthase	Fallow	Drought	Podzol	Basidiomycota	Agaricomycetes	Symbiotroph	9.33416	0
Methionine cycle / Transsulfuration pathway	S-adenosylmethionine synthase	Fallow	Drought	Podzol	Basidiomycota	Agaricomycetes	Symbiotroph	9.63268	0
Methionine cycle / Transsulfuration pathway	S-adenosylmethionine synthase	Fallow	Drought	Podzol	Basidiomycota	Agaricomycetes	Symbiotroph	9.33416	-2.78065
Methionine cycle / Transsulfuration pathway	S-adenosylmethionine synthase	Fallow	Drought	Podzol	Basidiomycota	Agaricomycetes	Unknown	9.33088	1.6114
Methionine cycle / Transsulfuration pathway	S-adenosylmethionine synthase	Fallow	Drought	Podzol	Basidiomycota	Dacrymycetes	Unknown	9.33416	1.52548
Methionine cycle / Transsulfuration pathway	S-adenosylmethionine synthase	Fallow	Drought	Podzol	Basidiomycota	Exobasidiomycetes	Unknown	9.33416	1.52548
Methionine cycle / Transsulfuration pathway	S-adenosylmethionine synthase	Fallow	Drought	Podzol	Basidiomycota	Malasseziomycetes	Pathotroph	9.33416	1.52548
Methionine cycle / Transsulfuration pathway	S-adenosylmethionine synthase	Fallow	Drought	Podzol	Basidiomycota	Microbotryomycetes	Unknown	9.33416	1.52548
Methionine cycle / Transsulfuration pathway	S-adenosylmethionine synthase	Fallow	Drought	Podzol	Basidiomycota	Pucciniomycetes	Unknown	9.33416	1.52548
Methionine cycle / Transsulfuration pathway	S-adenosylmethionine synthase	Fallow	Drought	Podzol	Basidiomycota	Tremellomycetes	Pathotroph	9.33416	1.52548
Methionine cycle / Transsulfuration pathway	S-adenosylmethionine synthase	Fallow	Drought	Podzol	Basidiomycota	Tremellomycetes	Unknown	9.33416	1.52548
Methionine cycle / Transsulfuration pathway	S-adenosylmethionine synthase	Fallow	Drought	Podzol	Basidiomycota	Ustilaginomycetes	Unknown	9.33416	1.52548
Methionine cycle / Transsulfuration pathway	S-adenosylmethionine synthase	Fallow	Drought	Podzol	Basidiomycota	Wallemiomycetes	Unknown	9.33416	1.52548
Methionine cycle / Transsulfuration pathway	S-adenosylmethionine synthase	Fallow	Drought	Podzol	Chytridiomycota	Neocallimastigomycetes	Unknown	9.33416	1.52548
Methionine cycle / Transsulfuration pathway	S-adenosylmethionine synthase	Fallow	Drought	Podzol	Mucoromycota	Endogonomycetes	Unknown	9.33416	1.52548
Methionine cycle / Transsulfuration pathway	S-adenosylmethionine synthase	Fallow	Drought	Podzol	Mucoromycota	Mortierellomycetes	Unknown	8.32659	-0.721805
Methionine cycle / Transsulfuration pathway	S-adenosylmethionine synthase	Fallow	Drought	Podzol	Mucoromycota	Mucoromycetes	Unknown	8.32659	-0.721805
Methionine cycle / Transsulfuration pathway	S-adenosylmethionine synthase	Fallow	Drought	Podzol	Zoopagomycota	Harpellomycetes	Unknown	9.33416	1.52548
Methionine cycle / Transsulfuration pathway	S-adenosylmethionine synthase	Legume/Grass	Drought	Luvisol	Ascomycota	Pichiomycetes	Unknown	10.1125	6.04042
Methionine cycle / Transsulfuration pathway	S-adenosylmethionine synthase	Legume/Grass	Drought	Luvisol	Basidiomycota	Agaricomycetes	Unknown	9.65572	5.93103
Methionine cycle / Transsulfuration pathway	S-adenosylmethionine synthase	Legume/Grass	Drought	Phaeozem	Ascomycota	Dipodascomycetes	Unknown	5.38992	0.561106
Methionine cycle / Transsulfuration pathway	S-adenosylmethionine synthase	Legume/Grass	Drought	Phaeozem	Ascomycota	Dothideomycetes	Unknown	5.38992	0.561106
Methionine cycle / Transsulfuration pathway	S-adenosylmethionine synthase	Legume/Grass	Drought	Phaeozem	Ascomycota	Eurotiomycetes	Pathotroph	5.38992	0.710944
Methionine cycle / Transsulfuration pathway	S-adenosylmethionine synthase	Legume/Grass	Drought	Phaeozem	Ascomycota	Eurotiomycetes	Pathotroph	5.38992	0.561106
Methionine cycle / Transsulfuration pathway	S-adenosylmethionine synthase	Legume/Grass	Drought	Phaeozem	Ascomycota	Eurotiomycetes	Pathotroph	5.38992	0.561106
Methionine cycle / Transsulfuration pathway	S-adenosylmethionine synthase	Legume/Grass	Drought	Phaeozem	Ascomycota	Eurotiomycetes	Pathotroph	5.38992	0.561106
Methionine cycle / Transsulfuration pathway	S-adenosylmethionine synthase	Legume/Grass	Drought	Phaeozem	Ascomycota	Eurotiomycetes	Pathotroph-Saprotroph	5.38992	0.710944
Methionine cycle / Transsulfuration pathway	S-adenosylmethionine synthase	Legume/Grass	Drought	Phaeozem	Ascomycota	Eurotiomycetes	Pathotroph-Saprotroph	5.38992	0.710944
Methionine cycle / Transsulfuration pathway	S-adenosylmethionine synthase	Legume/Grass	Drought	Phaeozem	Ascomycota	Eurotiomycetes	Pathotroph-Saprotroph	5.38992	0.710944
Methionine cycle / Transsulfuration pathway	S-adenosylmethionine synthase	Legume/Grass	Drought	Phaeozem	Ascomycota	Eurotiomycetes	Pathotroph-Saprotroph	5.38992	0.710944
Methionine cycle / Transsulfuration pathway	S-adenosylmethionine synthase	Legume/Grass	Drought	Phaeozem	Ascomycota	Eurotiomycetes	Saprotroph	5.38992	0.710944
Methionine cycle / Transsulfuration pathway	S-adenosylmethionine synthase	Legume/Grass	Drought	Phaeozem	Ascomycota	Eurotiomycetes	Symbiotroph	5.38992	0.561106
Methionine cycle / Transsulfuration pathway	S-adenosylmethionine synthase	Legume/Grass	Drought	Phaeozem	Ascomycota	Eurotiomycetes	Unknown	5.38992	0.5397
Methionine cycle / Transsulfuration pathway	S-adenosylmethionine synthase	Legume/Grass	Drought	Phaeozem	Ascomycota	Leotiomycetes	Unknown	5.38992	0.561106
Methionine cycle / Transsulfuration pathway	S-adenosylmethionine synthase	Legume/Grass	Drought	Phaeozem	Ascomycota	Lipomycetes	Unknown	5.38992	0.561106
Methionine cycle / Transsulfuration pathway	S-adenosylmethionine synthase	Legume/Grass	Drought	Phaeozem	Ascomycota	Neolectomycetes	Unknown	5.38992	0.561106
Methionine cycle / Transsulfuration pathway	S-adenosylmethionine synthase	Legume/Grass	Drought	Phaeozem	Ascomycota	Orbiliomycetes	Unknown	5.38992	0.561106
Methionine cycle / Transsulfuration pathway	S-adenosylmethionine synthase	Legume/Grass	Drought	Phaeozem	Ascomycota	Pichiomycetes	Saprotroph	5.38992	0.710944
Methionine cycle / Transsulfuration pathway	S-adenosylmethionine synthase	Legume/Grass	Drought	Phaeozem	Ascomycota	Pichiomycetes	Unknown	5.64194	0.499716
Methionine cycle / Transsulfuration pathway	S-adenosylmethionine synthase	Legume/Grass	Drought	Phaeozem	Ascomycota	Pneumocystomycetes	Unknown	5.38992	0.561106
Methionine cycle / Transsulfuration pathway	S-adenosylmethionine synthase	Legume/Grass	Drought	Phaeozem	Ascomycota	Saccharomycetes	Pathotroph	5.26128	0.225674
Methionine cycle / Transsulfuration pathway	S-adenosylmethionine synthase	Legume/Grass	Drought	Phaeozem	Ascomycota	Saccharomycetes	Unknown	5.39306	0.569287
Methionine cycle / Transsulfuration pathway	S-adenosylmethionine synthase	Legume/Grass	Drought	Phaeozem	Ascomycota	Schizosaccharomycetes	Unknown	5.38992	0.561106
Methionine cycle / Transsulfuration pathway	S-adenosylmethionine synthase	Legume/Grass	Drought	Phaeozem	Ascomycota	Taphrinomycetes	Pathotroph	5.26128	0
Methionine cycle / Transsulfuration pathway	S-adenosylmethionine synthase	Legume/Grass	Drought	Phaeozem	Ascomycota	Taphrinomycetes	Unknown	5.51856	0.746699
Methionine cycle / Transsulfuration pathway	S-adenosylmethionine synthase	Legume/Grass	Drought	Phaeozem	Ascomycota	Trigonopsidomycetes	Unknown	5.38992	0.561106
Methionine cycle / Transsulfuration pathway	S-adenosylmethionine synthase	Legume/Grass	Drought	Phaeozem	Basidiomycota	Agaricomycetes	Pathotroph-Saprotroph	9.57187	-1.02
Methionine cycle / Transsulfuration pathway	S-adenosylmethionine synthase	Legume/Grass	Drought	Phaeozem	Basidiomycota	Agaricomycetes	Saprotroph	9.57187	-1.02
Methionine cycle / Transsulfuration pathway	S-adenosylmethionine synthase	Legume/Grass	Drought	Phaeozem	Basidiomycota	Agaricomycetes	Saprotroph	9.57187	-1.02
Methionine cycle / Transsulfuration pathway	S-adenosylmethionine synthase	Legume/Grass	Drought	Phaeozem	Basidiomycota	Agaricomycetes	Saprotroph	10.3217	0.061781
Methionine cycle / Transsulfuration pathway	S-adenosylmethionine synthase	Legume/Grass	Drought	Phaeozem	Basidiomycota	Agaricomycetes	Symbiotroph	9.57187	-1.15377
Methionine cycle / Transsulfuration pathway	S-adenosylmethionine synthase	Legume/Grass	Drought	Phaeozem	Basidiomycota	Agaricomycetes	Unknown	9.56786	-1.09446
Methionine cycle / Transsulfuration pathway	S-adenosylmethionine synthase	Legume/Grass	Drought	Phaeozem	Basidiomycota	Dacrymycetes	Unknown	9.57187	-1.08688
Methionine cycle / Transsulfuration pathway	S-adenosylmethionine synthase	Legume/Grass	Drought	Phaeozem	Basidiomycota	Exobasidiomycetes	Unknown	9.57187	-1.08688
Methionine cycle / Transsulfuration pathway	S-adenosylmethionine synthase	Legume/Grass	Drought	Phaeozem	Basidiomycota	Malasseziomycetes	Pathotroph	9.57187	-1.08688
Methionine cycle / Transsulfuration pathway	S-adenosylmethionine synthase	Legume/Grass	Drought	Phaeozem	Basidiomycota	Microbotryomycetes	Unknown	9.57187	-1.08688
Methionine cycle / Transsulfuration pathway	S-adenosylmethionine synthase	Legume/Grass	Drought	Phaeozem	Basidiomycota	Pucciniomycetes	Unknown	9.57187	-1.08688
Methionine cycle / Transsulfuration pathway	S-adenosylmethionine synthase	Legume/Grass	Drought	Phaeozem	Basidiomycota	Tremellomycetes	Unknown	9.57187	-1.08956
Methionine cycle / Transsulfuration pathway	S-adenosylmethionine synthase	Legume/Grass	Drought	Phaeozem	Basidiomycota	Ustilaginomycetes	Pathotroph	10.3217	0.061781
Methionine cycle / Transsulfuration pathway	S-adenosylmethionine synthase	Legume/Grass	Drought	Phaeozem	Basidiomycota	Ustilaginomycetes	Pathotroph	10.3217	0.061781
Methionine cycle / Transsulfuration pathway	S-adenosylmethionine synthase	Legume/Grass	Drought	Phaeozem	Basidiomycota	Ustilaginomycetes	Unknown	9.5037	-1.19131
Methionine cycle / Transsulfuration pathway	S-adenosylmethionine synthase	Legume/Grass	Drought	Phaeozem	Basidiomycota	Wallemiomycetes	Unknown	9.57187	-1.08688
Methionine cycle / Transsulfuration pathway	S-adenosylmethionine synthase	Legume/Grass	Drought	Phaeozem	Chytridiomycota	Neocallimastigomycetes	Unknown	9.57187	-1.08688
Methionine cycle / Transsulfuration pathway	S-adenosylmethionine synthase	Legume/Grass	Drought	Phaeozem	Mucoromycota	Endogonomycetes	Unknown	9.57187	-1.08688
Methionine cycle / Transsulfuration pathway	S-adenosylmethionine synthase	Legume/Grass	Drought	Phaeozem	Zoopagomycota	Harpellomycetes	Unknown	9.57187	-1.08688
Methionine cycle / Transsulfuration pathway	S-adenosylmethionine synthase	Legume/Grass	Drought	Podzol	Ascomycota	Dipodascomycetes	Unknown	10.699	0.0909379
Methionine cycle / Transsulfuration pathway	S-adenosylmethionine synthase	Legume/Grass	Drought	Podzol	Ascomycota	Dothideomycetes	Unknown	10.699	0.0909379
Methionine cycle / Transsulfuration pathway	S-adenosylmethionine synthase	Legume/Grass	Drought	Podzol	Ascomycota	Eurotiomycetes	Pathotroph	10.699	0.0909379
Methionine cycle / Transsulfuration pathway	S-adenosylmethionine synthase	Legume/Grass	Drought	Podzol	Ascomycota	Eurotiomycetes	Pathotroph	10.699	0.0909379
Methionine cycle / Transsulfuration pathway	S-adenosylmethionine synthase	Legume/Grass	Drought	Podzol	Ascomycota	Eurotiomycetes	Pathotroph	10.699	0.0909379
Methionine cycle / Transsulfuration pathway	S-adenosylmethionine synthase	Legume/Grass	Drought	Podzol	Ascomycota	Eurotiomycetes	Pathotroph	10.699	0.0909379
Methionine cycle / Transsulfuration pathway	S-adenosylmethionine synthase	Legume/Grass	Drought	Podzol	Ascomycota	Eurotiomycetes	Pathotroph-Saprotroph	10.699	0.0909379
Methionine cycle / Transsulfuration pathway	S-adenosylmethionine synthase	Legume/Grass	Drought	Podzol	Ascomycota	Eurotiomycetes	Pathotroph-Saprotroph	10.699	0.0909379
Methionine cycle / Transsulfuration pathway	S-adenosylmethionine synthase	Legume/Grass	Drought	Podzol	Ascomycota	Eurotiomycetes	Pathotroph-Saprotroph	10.699	0.0909379
Methionine cycle / Transsulfuration pathway	S-adenosylmethionine synthase	Legume/Grass	Drought	Podzol	Ascomycota	Eurotiomycetes	Pathotroph-Saprotroph	10.699	0.0909379
Methionine cycle / Transsulfuration pathway	S-adenosylmethionine synthase	Legume/Grass	Drought	Podzol	Ascomycota	Eurotiomycetes	Saprotroph	10.699	0.0909379
Methionine cycle / Transsulfuration pathway	S-adenosylmethionine synthase	Legume/Grass	Drought	Podzol	Ascomycota	Eurotiomycetes	Symbiotroph	10.699	0.0909379
Methionine cycle / Transsulfuration pathway	S-adenosylmethionine synthase	Legume/Grass	Drought	Podzol	Ascomycota	Eurotiomycetes	Unknown	10.699	0.0909379
Methionine cycle / Transsulfuration pathway	S-adenosylmethionine synthase	Legume/Grass	Drought	Podzol	Ascomycota	Leotiomycetes	Unknown	10.699	0.0909379
Methionine cycle / Transsulfuration pathway	S-adenosylmethionine synthase	Legume/Grass	Drought	Podzol	Ascomycota	Lipomycetes	Unknown	10.699	0.0909379
Methionine cycle / Transsulfuration pathway	S-adenosylmethionine synthase	Legume/Grass	Drought	Podzol	Ascomycota	Neolectomycetes	Unknown	10.699	0.0909379
Methionine cycle / Transsulfuration pathway	S-adenosylmethionine synthase	Legume/Grass	Drought	Podzol	Ascomycota	Orbiliomycetes	Unknown	10.699	0.0909379
Methionine cycle / Transsulfuration pathway	S-adenosylmethionine synthase	Legume/Grass	Drought	Podzol	Ascomycota	Pichiomycetes	Saprotroph	10.699	0.0909379
Methionine cycle / Transsulfuration pathway	S-adenosylmethionine synthase	Legume/Grass	Drought	Podzol	Ascomycota	Pichiomycetes	Unknown	10.8293	0.209076
Methionine cycle / Transsulfuration pathway	S-adenosylmethionine synthase	Legume/Grass	Drought	Podzol	Ascomycota	Pneumocystomycetes	Unknown	10.699	0.0909379
Methionine cycle / Transsulfuration pathway	S-adenosylmethionine synthase	Legume/Grass	Drought	Podzol	Ascomycota	Saccharomycetes	Unknown	10.699	0.0909379
Methionine cycle / Transsulfuration pathway	S-adenosylmethionine synthase	Legume/Grass	Drought	Podzol	Ascomycota	Schizosaccharomycetes	Unknown	10.699	0.0909379
Methionine cycle / Transsulfuration pathway	S-adenosylmethionine synthase	Legume/Grass	Drought	Podzol	Ascomycota	Taphrinomycetes	Unknown	10.699	0.0909379
Methionine cycle / Transsulfuration pathway	S-adenosylmethionine synthase	Legume/Grass	Drought	Podzol	Ascomycota	Trigonopsidomycetes	Unknown	10.699	0.0909379
Methionine cycle / Transsulfuration pathway	S-adenosylmethionine synthase	Legume/Grass	Drought	Podzol	Basidiomycota	Agaricomycetes	Pathotroph-Saprotroph	9.63621	2.36535
Methionine cycle / Transsulfuration pathway	S-adenosylmethionine synthase	Legume/Grass	Drought	Podzol	Basidiomycota	Agaricomycetes	Pathotroph-Saprotroph	8.86493	0.00522316
Methionine cycle / Transsulfuration pathway	S-adenosylmethionine synthase	Legume/Grass	Drought	Podzol	Basidiomycota	Agaricomycetes	Saprotroph	9.63621	2.36535
Methionine cycle / Transsulfuration pathway	S-adenosylmethionine synthase	Legume/Grass	Drought	Podzol	Basidiomycota	Agaricomycetes	Saprotroph	9.12203	0.376126
Methionine cycle / Transsulfuration pathway	S-adenosylmethionine synthase	Legume/Grass	Drought	Podzol	Basidiomycota	Agaricomycetes	Saprotroph	8.86493	-1.24219
Methionine cycle / Transsulfuration pathway	S-adenosylmethionine synthase	Legume/Grass	Drought	Podzol	Basidiomycota	Agaricomycetes	Saprotroph	9.63621	-0.129484
Methionine cycle / Transsulfuration pathway	S-adenosylmethionine synthase	Legume/Grass	Drought	Podzol	Basidiomycota	Agaricomycetes	Symbiotroph	9.63621	-0.129484
Methionine cycle / Transsulfuration pathway	S-adenosylmethionine synthase	Legume/Grass	Drought	Podzol	Basidiomycota	Agaricomycetes	Symbiotroph	9.63621	-0.129484
Methionine cycle / Transsulfuration pathway	S-adenosylmethionine synthase	Legume/Grass	Drought	Podzol	Basidiomycota	Agaricomycetes	Symbiotroph	9.63621	0
Methionine cycle / Transsulfuration pathway	S-adenosylmethionine synthase	Legume/Grass	Drought	Podzol	Basidiomycota	Agaricomycetes	Symbiotroph	9.63621	1.11793
Methionine cycle / Transsulfuration pathway	S-adenosylmethionine synthase	Legume/Grass	Drought	Podzol	Basidiomycota	Agaricomycetes	Unknown	8.84409	0.0162736
Methionine cycle / Transsulfuration pathway	S-adenosylmethionine synthase	Legume/Grass	Drought	Podzol	Basidiomycota	Dacrymycetes	Unknown	8.86493	0.00522316
Methionine cycle / Transsulfuration pathway	S-adenosylmethionine synthase	Legume/Grass	Drought	Podzol	Basidiomycota	Exobasidiomycetes	Unknown	8.86493	0.00522316
Methionine cycle / Transsulfuration pathway	S-adenosylmethionine synthase	Legume/Grass	Drought	Podzol	Basidiomycota	Malasseziomycetes	Pathotroph	8.86493	0.00522316
Methionine cycle / Transsulfuration pathway	S-adenosylmethionine synthase	Legume/Grass	Drought	Podzol	Basidiomycota	Microbotryomycetes	Unknown	8.86493	0.00522316
Methionine cycle / Transsulfuration pathway	S-adenosylmethionine synthase	Legume/Grass	Drought	Podzol	Basidiomycota	Pucciniomycetes	Unknown	8.86493	0.00522316
Methionine cycle / Transsulfuration pathway	S-adenosylmethionine synthase	Legume/Grass	Drought	Podzol	Basidiomycota	Tremellomycetes	Pathotroph	8.86493	-1.24219
Methionine cycle / Transsulfuration pathway	S-adenosylmethionine synthase	Legume/Grass	Drought	Podzol	Basidiomycota	Tremellomycetes	Pathotroph	9.63621	0
Methionine cycle / Transsulfuration pathway	S-adenosylmethionine synthase	Legume/Grass	Drought	Podzol	Basidiomycota	Tremellomycetes	Pathotroph	9.63621	0
Methionine cycle / Transsulfuration pathway	S-adenosylmethionine synthase	Legume/Grass	Drought	Podzol	Basidiomycota	Tremellomycetes	Pathotroph	9.63621	0
Methionine cycle / Transsulfuration pathway	S-adenosylmethionine synthase	Legume/Grass	Drought	Podzol	Basidiomycota	Tremellomycetes	Unknown	8.8314	0.00674117
Methionine cycle / Transsulfuration pathway	S-adenosylmethionine synthase	Legume/Grass	Drought	Podzol	Basidiomycota	Ustilaginomycetes	Unknown	8.86493	0.00522316
Methionine cycle / Transsulfuration pathway	S-adenosylmethionine synthase	Legume/Grass	Drought	Podzol	Basidiomycota	Wallemiomycetes	Unknown	8.86493	0.00522316
Methionine cycle / Transsulfuration pathway	S-adenosylmethionine synthase	Legume/Grass	Drought	Podzol	Chytridiomycota	Neocallimastigomycetes	Unknown	8.86493	0.00522316
Methionine cycle / Transsulfuration pathway	S-adenosylmethionine synthase	Legume/Grass	Drought	Podzol	Mucoromycota	Endogonomycetes	Unknown	8.86493	0.00522316
Methionine cycle / Transsulfuration pathway	S-adenosylmethionine synthase	Legume/Grass	Drought	Podzol	Mucoromycota	Mortierellomycetes	Unknown	8.68533	0.745605
Methionine cycle / Transsulfuration pathway	S-adenosylmethionine synthase	Legume/Grass	Drought	Podzol	Mucoromycota	Mucoromycetes	Unknown	8.68533	0.745605
Methionine cycle / Transsulfuration pathway	S-adenosylmethionine synthase	Legume/Grass	Drought	Podzol	Zoopagomycota	Harpellomycetes	Unknown	8.86493	0.00522316
Methionine cycle / Transsulfuration pathway	aspartokinase	Brassica/Grass	Drought	Luvisol	Ascomycota	Sordariomycetes	Pathotroph	10.5023	-0.79894
Methionine cycle / Transsulfuration pathway	aspartokinase	Brassica/Grass	Drought	Phaeozem	Ascomycota	Sordariomycetes	Unknown	9.06211	4.31656
Methionine cycle / Transsulfuration pathway	aspartokinase	Brassica/Grass	Drought	Podzol	Ascomycota	Sordariomycetes	Unknown	9.62707	2.5684
Methionine cycle / Transsulfuration pathway	aspartokinase	Fallow	Drought	Luvisol	Ascomycota	Sordariomycetes	Unknown	10.9986	-0.122392
Methionine cycle / Transsulfuration pathway	aspartokinase	Fallow	Drought	Phaeozem	Ascomycota	Sordariomycetes	Pathotroph	7.72899	0
Methionine cycle / Transsulfuration pathway	aspartokinase	Fallow	Drought	Phaeozem	Ascomycota	Sordariomycetes	Unknown	7.22699	-0.545751
Methionine cycle / Transsulfuration pathway	aspartokinase	Fallow	Drought	Podzol	Ascomycota	Sordariomycetes	Pathotroph	11.4491	0
Methionine cycle / Transsulfuration pathway	aspartokinase	Fallow	Drought	Podzol	Ascomycota	Sordariomycetes	Unknown	8.61949	-0.760743
Methionine cycle / Transsulfuration pathway	aspartokinase	Legume/Grass	Drought	Luvisol	Ascomycota	Sordariomycetes	Pathotroph	11.1929	0
Methionine cycle / Transsulfuration pathway	aspartokinase	Legume/Grass	Drought	Luvisol	Ascomycota	Sordariomycetes	Unknown	8.54463	-4.33218
Methionine cycle / Transsulfuration pathway	aspartokinase	Legume/Grass	Drought	Phaeozem	Ascomycota	Sordariomycetes	Unknown	8.00391	0.652145
Methionine cycle / Transsulfuration pathway	aspartokinase	Legume/Grass	Drought	Podzol	Ascomycota	Sordariomycetes	Pathotroph	7.79431	0
Methionine cycle / Transsulfuration pathway	aspartokinase	Legume/Grass	Drought	Podzol	Ascomycota	Sordariomycetes	Unknown	5.95064	-5.5901
Methionine cycle / Transsulfuration pathway	homocysteine methyltransferase	Brassica/Grass	Drought	Luvisol	Basidiomycota	Agaricomycetes	Pathotroph-Saprotroph	6.07651	0
Methionine cycle / Transsulfuration pathway	homocysteine methyltransferase	Brassica/Grass	Drought	Luvisol	Basidiomycota	Agaricomycetes	Unknown	6.07651	-1.68994
Methionine cycle / Transsulfuration pathway	homocysteine methyltransferase	Brassica/Grass	Drought	Podzol	Mucoromycota	Mucoromycetes	Unknown	6.04743	1.59296
Methionine cycle / Transsulfuration pathway	homocysteine methyltransferase	Fallow	Drought	Luvisol	Basidiomycota	Agaricomycetes	Unknown	5.36376	-0.262504
Methionine cycle / Transsulfuration pathway	homocysteine methyltransferase	Fallow	Drought	Podzol	Mucoromycota	Mucoromycetes	Unknown	6.11925	0.66004
Methionine cycle / Transsulfuration pathway	homocysteine methyltransferase	Legume/Grass	Drought	Luvisol	Basidiomycota	Agaricomycetes	Unknown	7.9748	4.19169
Methionine cycle / Transsulfuration pathway	homocysteine methyltransferase	Legume/Grass	Drought	Podzol	Mucoromycota	Mucoromycetes	Unknown	6.21899	1.14819
Methionine cycle / Transsulfuration pathway	homoserine dehydrogenase	Brassica/Grass	Drought	Luvisol	Ascomycota	Sordariomycetes	Pathotroph	10.588	-0.184999
Methionine cycle / Transsulfuration pathway	homoserine dehydrogenase	Fallow	Drought	Luvisol	Ascomycota	Sordariomycetes	Unknown	8.63877	1.21625
Methionine cycle / Transsulfuration pathway	homoserine dehydrogenase	Legume/Grass	Drought	Luvisol	Ascomycota	Sordariomycetes	Pathotroph	10.1969	0
Methionine cycle / Transsulfuration pathway	homoserine dehydrogenase	Legume/Grass	Drought	Luvisol	Ascomycota	Sordariomycetes	Unknown	10.3124	0.0554404
Methionine cycle / Transsulfuration pathway	methionine synthase	Brassica/Grass	Drought	Luvisol	Basidiomycota	Agaricomycetes	Unknown	6.07651	-1.68994
Methionine cycle / Transsulfuration pathway	methionine synthase	Fallow	Drought	Luvisol	Basidiomycota	Agaricomycetes	Unknown	5.36376	-0.262504
Methionine cycle / Transsulfuration pathway	methionine synthase	Legume/Grass	Drought	Luvisol	Basidiomycota	Agaricomycetes	Unknown	7.9748	4.19169
Nitrogen cycle	glutamate dehydrogenase	Brassica/Grass	Drought	Podzol	Basidiomycota	Agaricomycetes	Unknown	10.8711	1.28099
Nitrogen cycle	glutamate dehydrogenase	Fallow	Drought	Podzol	Basidiomycota	Agaricomycetes	Unknown	10.5118	1.67656
Nitrogen cycle	glutamate dehydrogenase	Legume/Grass	Drought	Podzol	Basidiomycota	Agaricomycetes	Unknown	10.9509	2.38331
Nitrogen cycle	glutamate racemase	Brassica/Grass	Drought	Luvisol	Mucoromycota	Mucoromycetes	Unknown	7.22572	4.15451
Nitrogen cycle	glutamate racemase	Brassica/Grass	Drought	Phaeozem	Mucoromycota	Mucoromycetes	Unknown	4.76963	-1.86153
Nitrogen cycle	glutamate racemase	Brassica/Grass	Drought	Podzol	Mucoromycota	Mucoromycetes	Unknown	8.10418	-2.39642
Nitrogen cycle	glutamate racemase	Fallow	Drought	Luvisol	Mucoromycota	Mucoromycetes	Unknown	4.71872	0.876292
Nitrogen cycle	glutamate racemase	Fallow	Drought	Phaeozem	Mucoromycota	Mucoromycetes	Unknown	5.16151	0.105187
Nitrogen cycle	glutamate racemase	Fallow	Drought	Podzol	Mucoromycota	Mucoromycetes	Unknown	8.53775	1.71819
Nitrogen cycle	glutamate racemase	Legume/Grass	Drought	Luvisol	Mucoromycota	Mucoromycetes	Unknown	6.11064	2.49028
Nitrogen cycle	glutamate racemase	Legume/Grass	Drought	Phaeozem	Mucoromycota	Mucoromycetes	Unknown	7.05182	-0.547968
Nitrogen cycle	glutamate racemase	Legume/Grass	Drought	Podzol	Mucoromycota	Mucoromycetes	Unknown	7.03297	-1.49072
Nitrogen cycle	urease	Brassica/Grass	Drought	Podzol	Chytridiomycota	Chytridiomycetes	Unknown	8.4489	3.94153
Nitrogen cycle	urease	Fallow	Drought	Podzol	Chytridiomycota	Chytridiomycetes	Unknown	8.4673	2.10223
Nitrogen cycle	urease	Legume/Grass	Drought	Podzol	Chytridiomycota	Chytridiomycetes	Unknown	8.43784	0.153737
Osmoprotectants	1-pyrroline-5-carboxylate dehydrogenase	Brassica/Grass	Drought	Luvisol	Ascomycota	Dothideomycetes	Unknown	7.33434	3.78297
Osmoprotectants	1-pyrroline-5-carboxylate dehydrogenase	Brassica/Grass	Drought	Luvisol	Ascomycota	Eurotiomycetes	Pathotroph	7.33434	3.78297
Osmoprotectants	1-pyrroline-5-carboxylate dehydrogenase	Brassica/Grass	Drought	Luvisol	Ascomycota	Eurotiomycetes	Pathotroph	7.33434	3.78297
Osmoprotectants	1-pyrroline-5-carboxylate dehydrogenase	Brassica/Grass	Drought	Luvisol	Ascomycota	Eurotiomycetes	Pathotroph	7.33434	3.78297
Osmoprotectants	1-pyrroline-5-carboxylate dehydrogenase	Brassica/Grass	Drought	Luvisol	Ascomycota	Eurotiomycetes	Pathotroph	7.33434	3.78297
Osmoprotectants	1-pyrroline-5-carboxylate dehydrogenase	Brassica/Grass	Drought	Luvisol	Ascomycota	Eurotiomycetes	Pathotroph-Saprotroph	7.33434	3.78297
Osmoprotectants	1-pyrroline-5-carboxylate dehydrogenase	Brassica/Grass	Drought	Luvisol	Ascomycota	Eurotiomycetes	Pathotroph-Saprotroph	7.33434	3.78297
Osmoprotectants	1-pyrroline-5-carboxylate dehydrogenase	Brassica/Grass	Drought	Luvisol	Ascomycota	Eurotiomycetes	Pathotroph-Saprotroph	7.33434	3.78297
Osmoprotectants	1-pyrroline-5-carboxylate dehydrogenase	Brassica/Grass	Drought	Luvisol	Ascomycota	Eurotiomycetes	Pathotroph-Saprotroph	7.33434	3.78297
Osmoprotectants	1-pyrroline-5-carboxylate dehydrogenase	Brassica/Grass	Drought	Luvisol	Ascomycota	Eurotiomycetes	Saprotroph	7.33434	3.78297
Osmoprotectants	1-pyrroline-5-carboxylate dehydrogenase	Brassica/Grass	Drought	Luvisol	Ascomycota	Eurotiomycetes	Symbiotroph	7.33434	3.78297
Osmoprotectants	1-pyrroline-5-carboxylate dehydrogenase	Brassica/Grass	Drought	Luvisol	Ascomycota	Eurotiomycetes	Unknown	7.33434	3.78297
Osmoprotectants	1-pyrroline-5-carboxylate dehydrogenase	Brassica/Grass	Drought	Luvisol	Ascomycota	Orbiliomycetes	Unknown	7.33434	3.78297
Osmoprotectants	1-pyrroline-5-carboxylate dehydrogenase	Brassica/Grass	Drought	Luvisol	Ascomycota	Pezizomycetes	Unknown	7.33434	3.78297
Osmoprotectants	1-pyrroline-5-carboxylate dehydrogenase	Brassica/Grass	Drought	Luvisol	Ascomycota	Sordariomycetes	Pathotroph	4.96903	0
Osmoprotectants	1-pyrroline-5-carboxylate dehydrogenase	Brassica/Grass	Drought	Luvisol	Ascomycota	Sordariomycetes	Pathotroph	7.33434	3.93926
Osmoprotectants	1-pyrroline-5-carboxylate dehydrogenase	Brassica/Grass	Drought	Luvisol	Ascomycota	Sordariomycetes	Pathotroph-Symbiotroph	4.96903	0
Osmoprotectants	1-pyrroline-5-carboxylate dehydrogenase	Brassica/Grass	Drought	Luvisol	Ascomycota	Sordariomycetes	Symbiotroph	6.54591	2.6455
Osmoprotectants	1-pyrroline-5-carboxylate dehydrogenase	Brassica/Grass	Drought	Luvisol	Ascomycota	Sordariomycetes	Unknown	7.54937	4.07281
Osmoprotectants	1-pyrroline-5-carboxylate dehydrogenase	Brassica/Grass	Drought	Luvisol	Basidiomycota	Agaricomycetes	Unknown	10.0213	-0.0760661
Osmoprotectants	1-pyrroline-5-carboxylate dehydrogenase	Brassica/Grass	Drought	Luvisol	Chytridiomycota	Chytridiomycetes	Unknown	10.0213	-0.0760661
Osmoprotectants	1-pyrroline-5-carboxylate dehydrogenase	Brassica/Grass	Drought	Luvisol	Mucoromycota	Endogonomycetes	Unknown	10.0213	-0.0760661
Osmoprotectants	1-pyrroline-5-carboxylate dehydrogenase	Brassica/Grass	Drought	Luvisol	Mucoromycota	Mortierellomycetes	Unknown	10.0213	-0.0760661
Osmoprotectants	1-pyrroline-5-carboxylate dehydrogenase	Brassica/Grass	Drought	Luvisol	Mucoromycota	Mucoromycetes	Unknown	10.0213	-0.0760661
Osmoprotectants	1-pyrroline-5-carboxylate dehydrogenase	Brassica/Grass	Drought	Phaeozem	Basidiomycota	Agaricomycetes	Unknown	8.36577	1.21523
Osmoprotectants	1-pyrroline-5-carboxylate dehydrogenase	Fallow	Drought	Luvisol	Ascomycota	Dothideomycetes	Unknown	5.54542	0.626651
Osmoprotectants	1-pyrroline-5-carboxylate dehydrogenase	Fallow	Drought	Luvisol	Ascomycota	Eurotiomycetes	Pathotroph	5.54542	0.626651
Osmoprotectants	1-pyrroline-5-carboxylate dehydrogenase	Fallow	Drought	Luvisol	Ascomycota	Eurotiomycetes	Pathotroph	5.54542	0.626651
Osmoprotectants	1-pyrroline-5-carboxylate dehydrogenase	Fallow	Drought	Luvisol	Ascomycota	Eurotiomycetes	Pathotroph	5.54542	0.626651
Osmoprotectants	1-pyrroline-5-carboxylate dehydrogenase	Fallow	Drought	Luvisol	Ascomycota	Eurotiomycetes	Pathotroph	5.54542	0.626651
Osmoprotectants	1-pyrroline-5-carboxylate dehydrogenase	Fallow	Drought	Luvisol	Ascomycota	Eurotiomycetes	Pathotroph-Saprotroph	5.54542	0.626651
Osmoprotectants	1-pyrroline-5-carboxylate dehydrogenase	Fallow	Drought	Luvisol	Ascomycota	Eurotiomycetes	Pathotroph-Saprotroph	5.54542	0.626651
Osmoprotectants	1-pyrroline-5-carboxylate dehydrogenase	Fallow	Drought	Luvisol	Ascomycota	Eurotiomycetes	Pathotroph-Saprotroph	5.54542	0.626651
Osmoprotectants	1-pyrroline-5-carboxylate dehydrogenase	Fallow	Drought	Luvisol	Ascomycota	Eurotiomycetes	Pathotroph-Saprotroph	5.54542	0.626651
Osmoprotectants	1-pyrroline-5-carboxylate dehydrogenase	Fallow	Drought	Luvisol	Ascomycota	Eurotiomycetes	Saprotroph	5.54542	0.626651
Osmoprotectants	1-pyrroline-5-carboxylate dehydrogenase	Fallow	Drought	Luvisol	Ascomycota	Eurotiomycetes	Symbiotroph	5.54542	0.626651
Osmoprotectants	1-pyrroline-5-carboxylate dehydrogenase	Fallow	Drought	Luvisol	Ascomycota	Eurotiomycetes	Unknown	5.54542	0.626651
Osmoprotectants	1-pyrroline-5-carboxylate dehydrogenase	Fallow	Drought	Luvisol	Ascomycota	Orbiliomycetes	Saprotroph	7.28515	3.13655
Osmoprotectants	1-pyrroline-5-carboxylate dehydrogenase	Fallow	Drought	Luvisol	Ascomycota	Orbiliomycetes	Unknown	5.29689	0.268094
Osmoprotectants	1-pyrroline-5-carboxylate dehydrogenase	Fallow	Drought	Luvisol	Ascomycota	Pezizomycetes	Unknown	5.54542	0.626651
Osmoprotectants	1-pyrroline-5-carboxylate dehydrogenase	Fallow	Drought	Luvisol	Ascomycota	Sordariomycetes	Pathotroph	5.54542	1.42905
Osmoprotectants	1-pyrroline-5-carboxylate dehydrogenase	Fallow	Drought	Luvisol	Ascomycota	Sordariomycetes	Symbiotroph	5.54542	0.359184
Osmoprotectants	1-pyrroline-5-carboxylate dehydrogenase	Fallow	Drought	Luvisol	Ascomycota	Sordariomycetes	Unknown	5.54542	0.661538
Osmoprotectants	1-pyrroline-5-carboxylate dehydrogenase	Fallow	Drought	Luvisol	Basidiomycota	Agaricomycetes	Unknown	8.18667	0.738256
Osmoprotectants	1-pyrroline-5-carboxylate dehydrogenase	Fallow	Drought	Luvisol	Chytridiomycota	Chytridiomycetes	Unknown	8.18667	0.738256
Osmoprotectants	1-pyrroline-5-carboxylate dehydrogenase	Fallow	Drought	Luvisol	Mucoromycota	Endogonomycetes	Unknown	8.18667	0.738256
Osmoprotectants	1-pyrroline-5-carboxylate dehydrogenase	Fallow	Drought	Luvisol	Mucoromycota	Mortierellomycetes	Unknown	8.18667	0.738256
Osmoprotectants	1-pyrroline-5-carboxylate dehydrogenase	Fallow	Drought	Luvisol	Mucoromycota	Mucoromycetes	Unknown	8.18667	0.738256
Osmoprotectants	1-pyrroline-5-carboxylate dehydrogenase	Fallow	Drought	Phaeozem	Basidiomycota	Agaricomycetes	Unknown	4.97623	-2.6045
Osmoprotectants	1-pyrroline-5-carboxylate dehydrogenase	Legume/Grass	Drought	Luvisol	Ascomycota	Dothideomycetes	Unknown	8.21274	4.71989
Osmoprotectants	1-pyrroline-5-carboxylate dehydrogenase	Legume/Grass	Drought	Luvisol	Ascomycota	Eurotiomycetes	Pathotroph	8.21274	4.71989
Osmoprotectants	1-pyrroline-5-carboxylate dehydrogenase	Legume/Grass	Drought	Luvisol	Ascomycota	Eurotiomycetes	Pathotroph	8.21274	4.71989
Osmoprotectants	1-pyrroline-5-carboxylate dehydrogenase	Legume/Grass	Drought	Luvisol	Ascomycota	Eurotiomycetes	Pathotroph	8.21274	4.71989
Osmoprotectants	1-pyrroline-5-carboxylate dehydrogenase	Legume/Grass	Drought	Luvisol	Ascomycota	Eurotiomycetes	Pathotroph	8.21274	4.71989
Osmoprotectants	1-pyrroline-5-carboxylate dehydrogenase	Legume/Grass	Drought	Luvisol	Ascomycota	Eurotiomycetes	Pathotroph-Saprotroph	8.21274	4.71989
Osmoprotectants	1-pyrroline-5-carboxylate dehydrogenase	Legume/Grass	Drought	Luvisol	Ascomycota	Eurotiomycetes	Pathotroph-Saprotroph	8.21274	4.71989
Osmoprotectants	1-pyrroline-5-carboxylate dehydrogenase	Legume/Grass	Drought	Luvisol	Ascomycota	Eurotiomycetes	Pathotroph-Saprotroph	8.21274	4.71989
Osmoprotectants	1-pyrroline-5-carboxylate dehydrogenase	Legume/Grass	Drought	Luvisol	Ascomycota	Eurotiomycetes	Pathotroph-Saprotroph	8.21274	4.71989
Osmoprotectants	1-pyrroline-5-carboxylate dehydrogenase	Legume/Grass	Drought	Luvisol	Ascomycota	Eurotiomycetes	Saprotroph	8.21274	4.71989
Osmoprotectants	1-pyrroline-5-carboxylate dehydrogenase	Legume/Grass	Drought	Luvisol	Ascomycota	Eurotiomycetes	Symbiotroph	8.21274	4.71989
Osmoprotectants	1-pyrroline-5-carboxylate dehydrogenase	Legume/Grass	Drought	Luvisol	Ascomycota	Eurotiomycetes	Unknown	8.21274	4.71989
Osmoprotectants	1-pyrroline-5-carboxylate dehydrogenase	Legume/Grass	Drought	Luvisol	Ascomycota	Orbiliomycetes	Saprotroph	6.52831	0
Osmoprotectants	1-pyrroline-5-carboxylate dehydrogenase	Legume/Grass	Drought	Luvisol	Ascomycota	Orbiliomycetes	Unknown	8.45337	5.06705
Osmoprotectants	1-pyrroline-5-carboxylate dehydrogenase	Legume/Grass	Drought	Luvisol	Ascomycota	Pezizomycetes	Unknown	8.21274	4.71989
Osmoprotectants	1-pyrroline-5-carboxylate dehydrogenase	Legume/Grass	Drought	Luvisol	Ascomycota	Sordariomycetes	Pathotroph	8.21274	4.71989
Osmoprotectants	1-pyrroline-5-carboxylate dehydrogenase	Legume/Grass	Drought	Luvisol	Ascomycota	Sordariomycetes	Symbiotroph	8.21274	4.71989
Osmoprotectants	1-pyrroline-5-carboxylate dehydrogenase	Legume/Grass	Drought	Luvisol	Ascomycota	Sordariomycetes	Unknown	8.21274	4.71989
Osmoprotectants	1-pyrroline-5-carboxylate dehydrogenase	Legume/Grass	Drought	Luvisol	Basidiomycota	Agaricomycetes	Unknown	10.2556	-0.248374
Osmoprotectants	1-pyrroline-5-carboxylate dehydrogenase	Legume/Grass	Drought	Luvisol	Chytridiomycota	Chytridiomycetes	Unknown	10.2556	-0.248374
Osmoprotectants	1-pyrroline-5-carboxylate dehydrogenase	Legume/Grass	Drought	Luvisol	Mucoromycota	Endogonomycetes	Unknown	10.2556	-0.248374
Osmoprotectants	1-pyrroline-5-carboxylate dehydrogenase	Legume/Grass	Drought	Luvisol	Mucoromycota	Mortierellomycetes	Unknown	10.2556	-0.248374
Osmoprotectants	1-pyrroline-5-carboxylate dehydrogenase	Legume/Grass	Drought	Luvisol	Mucoromycota	Mucoromycetes	Unknown	10.2556	-0.248374
Osmoprotectants	1-pyrroline-5-carboxylate dehydrogenase	Legume/Grass	Drought	Phaeozem	Basidiomycota	Agaricomycetes	Unknown	5.53941	-2.78607
Osmoprotectants	glycerol-3-phosphate dehydrogenase	Brassica/Grass	Drought	Luvisol	Ascomycota	Orbiliomycetes	Unknown	8.74215	5.66043
Osmoprotectants	glycerol-3-phosphate dehydrogenase	Brassica/Grass	Drought	Luvisol	Basidiomycota	Malasseziomycetes	Pathotroph	5.96116	0
Osmoprotectants	glycerol-3-phosphate dehydrogenase	Brassica/Grass	Drought	Luvisol	Basidiomycota	Microbotryomycetes	Unknown	5.96116	0
Osmoprotectants	glycerol-3-phosphate dehydrogenase	Brassica/Grass	Drought	Luvisol	Basidiomycota	Pucciniomycetes	Unknown	5.96116	0
Osmoprotectants	glycerol-3-phosphate dehydrogenase	Brassica/Grass	Drought	Luvisol	Basidiomycota	Tremellomycetes	Unknown	5.96116	0
Osmoprotectants	glycerol-3-phosphate dehydrogenase	Brassica/Grass	Drought	Luvisol	Chytridiomycota	Chytridiomycetes	Unknown	5.96116	0
Osmoprotectants	glycerol-3-phosphate dehydrogenase	Brassica/Grass	Drought	Luvisol	Mucoromycota	Mucoromycetes	Pathotroph	5.96116	0
Osmoprotectants	glycerol-3-phosphate dehydrogenase	Brassica/Grass	Drought	Luvisol	Mucoromycota	Mucoromycetes	Pathotroph	5.96116	0
Osmoprotectants	glycerol-3-phosphate dehydrogenase	Brassica/Grass	Drought	Luvisol	Mucoromycota	Mucoromycetes	Pathotroph-Symbiotroph	5.96116	0
Osmoprotectants	glycerol-3-phosphate dehydrogenase	Brassica/Grass	Drought	Luvisol	Mucoromycota	Mucoromycetes	Unknown	5.96116	0
Osmoprotectants	glycerol-3-phosphate dehydrogenase	Brassica/Grass	Drought	Luvisol	Mucoromycota	Umbelopsidomycetes	Saprotroph	5.12979	0
Osmoprotectants	glycerol-3-phosphate dehydrogenase	Brassica/Grass	Drought	Luvisol	Mucoromycota	Umbelopsidomycetes	Unknown	6.79253	0
Osmoprotectants	glycerol-3-phosphate dehydrogenase	Brassica/Grass	Drought	Luvisol	Zoopagomycota	Basidiobolomycetes	Unknown	5.96116	0
Osmoprotectants	glycerol-3-phosphate dehydrogenase	Fallow	Drought	Luvisol	Ascomycota	Orbiliomycetes	Saprotroph	6.46956	3.18056
Osmoprotectants	glycerol-3-phosphate dehydrogenase	Fallow	Drought	Luvisol	Ascomycota	Orbiliomycetes	Unknown	8.397	5.96127
Osmoprotectants	glycerol-3-phosphate dehydrogenase	Fallow	Drought	Luvisol	Basidiomycota	Malasseziomycetes	Pathotroph	6.45111	0
Osmoprotectants	glycerol-3-phosphate dehydrogenase	Fallow	Drought	Luvisol	Basidiomycota	Microbotryomycetes	Unknown	6.45111	0
Osmoprotectants	glycerol-3-phosphate dehydrogenase	Fallow	Drought	Luvisol	Basidiomycota	Pucciniomycetes	Unknown	6.45111	0
Osmoprotectants	glycerol-3-phosphate dehydrogenase	Fallow	Drought	Luvisol	Basidiomycota	Tremellomycetes	Unknown	6.45111	0
Osmoprotectants	glycerol-3-phosphate dehydrogenase	Fallow	Drought	Luvisol	Chytridiomycota	Chytridiomycetes	Unknown	6.45111	0
Osmoprotectants	glycerol-3-phosphate dehydrogenase	Fallow	Drought	Luvisol	Mucoromycota	Mucoromycetes	Pathotroph	6.45111	0
Osmoprotectants	glycerol-3-phosphate dehydrogenase	Fallow	Drought	Luvisol	Mucoromycota	Mucoromycetes	Pathotroph	6.45111	0
Osmoprotectants	glycerol-3-phosphate dehydrogenase	Fallow	Drought	Luvisol	Mucoromycota	Mucoromycetes	Pathotroph-Symbiotroph	6.45111	0
Osmoprotectants	glycerol-3-phosphate dehydrogenase	Fallow	Drought	Luvisol	Mucoromycota	Mucoromycetes	Unknown	6.45111	0
Osmoprotectants	glycerol-3-phosphate dehydrogenase	Fallow	Drought	Luvisol	Mucoromycota	Umbelopsidomycetes	Saprotroph	6.57125	0
Osmoprotectants	glycerol-3-phosphate dehydrogenase	Fallow	Drought	Luvisol	Mucoromycota	Umbelopsidomycetes	Unknown	6.33096	0
Osmoprotectants	glycerol-3-phosphate dehydrogenase	Fallow	Drought	Luvisol	Zoopagomycota	Basidiobolomycetes	Unknown	6.45111	0
Osmoprotectants	glycerol-3-phosphate dehydrogenase	Legume/Grass	Drought	Luvisol	Ascomycota	Orbiliomycetes	Saprotroph	6.69606	0
Osmoprotectants	glycerol-3-phosphate dehydrogenase	Legume/Grass	Drought	Luvisol	Ascomycota	Orbiliomycetes	Unknown	7.0902	3.283
Osmoprotectants	glycerol-3-phosphate dehydrogenase	Legume/Grass	Drought	Luvisol	Basidiomycota	Malasseziomycetes	Pathotroph	7.55422	0
Osmoprotectants	glycerol-3-phosphate dehydrogenase	Legume/Grass	Drought	Luvisol	Basidiomycota	Microbotryomycetes	Unknown	7.55422	0
Osmoprotectants	glycerol-3-phosphate dehydrogenase	Legume/Grass	Drought	Luvisol	Basidiomycota	Pucciniomycetes	Unknown	7.55422	0
Osmoprotectants	glycerol-3-phosphate dehydrogenase	Legume/Grass	Drought	Luvisol	Basidiomycota	Tremellomycetes	Unknown	7.55422	0
Osmoprotectants	glycerol-3-phosphate dehydrogenase	Legume/Grass	Drought	Luvisol	Chytridiomycota	Chytridiomycetes	Unknown	7.55422	0
Osmoprotectants	glycerol-3-phosphate dehydrogenase	Legume/Grass	Drought	Luvisol	Mucoromycota	Mucoromycetes	Pathotroph	7.55422	0
Osmoprotectants	glycerol-3-phosphate dehydrogenase	Legume/Grass	Drought	Luvisol	Mucoromycota	Mucoromycetes	Pathotroph	7.55422	0
Osmoprotectants	glycerol-3-phosphate dehydrogenase	Legume/Grass	Drought	Luvisol	Mucoromycota	Mucoromycetes	Pathotroph-Symbiotroph	7.55422	0
Osmoprotectants	glycerol-3-phosphate dehydrogenase	Legume/Grass	Drought	Luvisol	Mucoromycota	Mucoromycetes	Unknown	7.55422	0
Osmoprotectants	glycerol-3-phosphate dehydrogenase	Legume/Grass	Drought	Luvisol	Mucoromycota	Umbelopsidomycetes	Unknown	7.55422	0
Osmoprotectants	glycerol-3-phosphate dehydrogenase	Legume/Grass	Drought	Luvisol	Zoopagomycota	Basidiobolomycetes	Unknown	7.55422	0
Oxidative stress responders	aldehyde dehydrogenase (NAD+)	Brassica/Grass	Drought	Luvisol	Ascomycota	Eurotiomycetes	Pathotroph	6.01604	0.0970388
Oxidative stress responders	aldehyde dehydrogenase (NAD+)	Brassica/Grass	Drought	Luvisol	Ascomycota	Eurotiomycetes	Pathotroph	6.8829	1.30659
Oxidative stress responders	aldehyde dehydrogenase (NAD+)	Brassica/Grass	Drought	Luvisol	Ascomycota	Eurotiomycetes	Pathotroph	5.04891	-2.29541
Oxidative stress responders	aldehyde dehydrogenase (NAD+)	Brassica/Grass	Drought	Luvisol	Ascomycota	Eurotiomycetes	Pathotroph	5.04891	-2.29541
Oxidative stress responders	aldehyde dehydrogenase (NAD+)	Brassica/Grass	Drought	Luvisol	Ascomycota	Eurotiomycetes	Pathotroph-Saprotroph	6.98317	1.9909
Oxidative stress responders	aldehyde dehydrogenase (NAD+)	Brassica/Grass	Drought	Luvisol	Ascomycota	Eurotiomycetes	Symbiotroph	5.04891	-2.29541
Oxidative stress responders	aldehyde dehydrogenase (NAD+)	Brassica/Grass	Drought	Luvisol	Ascomycota	Eurotiomycetes	Unknown	6.98986	2.03652
Oxidative stress responders	aldehyde dehydrogenase (NAD+)	Brassica/Grass	Drought	Luvisol	Ascomycota	Saccharomycetes	Unknown	6.98317	1.9909
Oxidative stress responders	aldehyde dehydrogenase (NAD+)	Brassica/Grass	Drought	Luvisol	Ascomycota	Sordariomycetes	Pathotroph	6.98317	1.9909
Oxidative stress responders	aldehyde dehydrogenase (NAD+)	Brassica/Grass	Drought	Luvisol	Ascomycota	Sordariomycetes	Pathotroph	6.98317	1.9909
Oxidative stress responders	aldehyde dehydrogenase (NAD+)	Brassica/Grass	Drought	Luvisol	Ascomycota	Sordariomycetes	Pathotroph-Symbiotroph	6.98317	1.9909
Oxidative stress responders	aldehyde dehydrogenase (NAD+)	Brassica/Grass	Drought	Luvisol	Ascomycota	Sordariomycetes	Symbiotroph	6.98317	1.9909
Oxidative stress responders	aldehyde dehydrogenase (NAD+)	Brassica/Grass	Drought	Luvisol	Ascomycota	Sordariomycetes	Unknown	5.18707	-1.89665
Oxidative stress responders	aldehyde dehydrogenase (NAD+)	Brassica/Grass	Drought	Phaeozem	Basidiomycota	Agaricomycetes	Pathotroph	8.36577	4.92513
Oxidative stress responders	aldehyde dehydrogenase (NAD+)	Brassica/Grass	Drought	Phaeozem	Basidiomycota	Agaricomycetes	Pathotroph-Saprotroph	8.36577	4.92513
Oxidative stress responders	aldehyde dehydrogenase (NAD+)	Brassica/Grass	Drought	Phaeozem	Basidiomycota	Agaricomycetes	Pathotroph-Saprotroph	8.36577	4.92513
Oxidative stress responders	aldehyde dehydrogenase (NAD+)	Brassica/Grass	Drought	Phaeozem	Basidiomycota	Agaricomycetes	Pathotroph-Saprotroph	8.36577	4.92513
Oxidative stress responders	aldehyde dehydrogenase (NAD+)	Brassica/Grass	Drought	Phaeozem	Basidiomycota	Agaricomycetes	Saprotroph	8.36577	0
Oxidative stress responders	aldehyde dehydrogenase (NAD+)	Brassica/Grass	Drought	Phaeozem	Basidiomycota	Agaricomycetes	Saprotroph	8.36577	0
Oxidative stress responders	aldehyde dehydrogenase (NAD+)	Brassica/Grass	Drought	Phaeozem	Basidiomycota	Agaricomycetes	Saprotroph	8.36577	-2.49466
Oxidative stress responders	aldehyde dehydrogenase (NAD+)	Brassica/Grass	Drought	Phaeozem	Basidiomycota	Agaricomycetes	Symbiotroph	8.36577	-2.49466
Oxidative stress responders	aldehyde dehydrogenase (NAD+)	Brassica/Grass	Drought	Phaeozem	Basidiomycota	Agaricomycetes	Symbiotroph	8.36577	-2.49466
Oxidative stress responders	aldehyde dehydrogenase (NAD+)	Brassica/Grass	Drought	Phaeozem	Basidiomycota	Agaricomycetes	Symbiotroph	8.36577	-2.49466
Oxidative stress responders	aldehyde dehydrogenase (NAD+)	Brassica/Grass	Drought	Phaeozem	Basidiomycota	Agaricomycetes	Symbiotroph	8.36577	0
Oxidative stress responders	aldehyde dehydrogenase (NAD+)	Brassica/Grass	Drought	Phaeozem	Basidiomycota	Agaricomycetes	Unknown	8.36577	1.32371
Oxidative stress responders	aldehyde dehydrogenase (NAD+)	Brassica/Grass	Drought	Phaeozem	Basidiomycota	Dacrymycetes	Unknown	8.36577	1.21523
Oxidative stress responders	aldehyde dehydrogenase (NAD+)	Brassica/Grass	Drought	Phaeozem	Basidiomycota	Exobasidiomycetes	Unknown	8.36577	1.21523
Oxidative stress responders	aldehyde dehydrogenase (NAD+)	Brassica/Grass	Drought	Phaeozem	Basidiomycota	Microbotryomycetes	Unknown	8.36577	1.21523
Oxidative stress responders	aldehyde dehydrogenase (NAD+)	Brassica/Grass	Drought	Phaeozem	Basidiomycota	Tremellomycetes	Unknown	9.18652	2.31986
Oxidative stress responders	aldehyde dehydrogenase (NAD+)	Brassica/Grass	Drought	Phaeozem	Basidiomycota	Ustilaginomycetes	Unknown	8.36577	1.21523
Oxidative stress responders	aldehyde dehydrogenase (NAD+)	Brassica/Grass	Drought	Phaeozem	Mucoromycota	Glomeromycetes	Unknown	8.36577	1.21523
Oxidative stress responders	aldehyde dehydrogenase (NAD+)	Brassica/Grass	Drought	Phaeozem	Mucoromycota	Mucoromycetes	Unknown	8.36577	1.21523
Oxidative stress responders	aldehyde dehydrogenase (NAD+)	Brassica/Grass	Drought	Podzol	Ascomycota	Eurotiomycetes	Pathotroph	6.78639	0.91533
Oxidative stress responders	aldehyde dehydrogenase (NAD+)	Brassica/Grass	Drought	Podzol	Ascomycota	Eurotiomycetes	Pathotroph-Saprotroph	6.88725	0.607141
Oxidative stress responders	aldehyde dehydrogenase (NAD+)	Brassica/Grass	Drought	Podzol	Ascomycota	Eurotiomycetes	Symbiotroph	6.58468	-1.19045
Oxidative stress responders	aldehyde dehydrogenase (NAD+)	Brassica/Grass	Drought	Podzol	Ascomycota	Eurotiomycetes	Unknown	7.32842	0.944533
Oxidative stress responders	aldehyde dehydrogenase (NAD+)	Brassica/Grass	Drought	Podzol	Ascomycota	Saccharomycetes	Unknown	6.88725	0.607141
Oxidative stress responders	aldehyde dehydrogenase (NAD+)	Brassica/Grass	Drought	Podzol	Ascomycota	Sordariomycetes	Pathotroph	6.88725	0.607141
Oxidative stress responders	aldehyde dehydrogenase (NAD+)	Brassica/Grass	Drought	Podzol	Ascomycota	Sordariomycetes	Pathotroph	6.88725	0.607141
Oxidative stress responders	aldehyde dehydrogenase (NAD+)	Brassica/Grass	Drought	Podzol	Ascomycota	Sordariomycetes	Pathotroph-Symbiotroph	6.88725	0.607141
Oxidative stress responders	aldehyde dehydrogenase (NAD+)	Brassica/Grass	Drought	Podzol	Ascomycota	Sordariomycetes	Symbiotroph	6.88725	0.607141
Oxidative stress responders	aldehyde dehydrogenase (NAD+)	Brassica/Grass	Drought	Podzol	Ascomycota	Sordariomycetes	Unknown	6.88725	0.607141
Oxidative stress responders	aldehyde dehydrogenase (NAD+)	Fallow	Drought	Luvisol	Ascomycota	Eurotiomycetes	Pathotroph	6.71534	3.08142
Oxidative stress responders	aldehyde dehydrogenase (NAD+)	Fallow	Drought	Luvisol	Ascomycota	Eurotiomycetes	Pathotroph	6.37941	4.29221
Oxidative stress responders	aldehyde dehydrogenase (NAD+)	Fallow	Drought	Luvisol	Ascomycota	Eurotiomycetes	Pathotroph	6.37941	4.29221
Oxidative stress responders	aldehyde dehydrogenase (NAD+)	Fallow	Drought	Luvisol	Ascomycota	Eurotiomycetes	Pathotroph-Saprotroph	7.05126	2.3775
Oxidative stress responders	aldehyde dehydrogenase (NAD+)	Fallow	Drought	Luvisol	Ascomycota	Eurotiomycetes	Symbiotroph	6.37941	4.29221
Oxidative stress responders	aldehyde dehydrogenase (NAD+)	Fallow	Drought	Luvisol	Ascomycota	Eurotiomycetes	Unknown	7.05126	2.36585
Oxidative stress responders	aldehyde dehydrogenase (NAD+)	Fallow	Drought	Luvisol	Ascomycota	Saccharomycetes	Unknown	7.05126	2.3775
Oxidative stress responders	aldehyde dehydrogenase (NAD+)	Fallow	Drought	Luvisol	Ascomycota	Sordariomycetes	Pathotroph	7.05126	2.3775
Oxidative stress responders	aldehyde dehydrogenase (NAD+)	Fallow	Drought	Luvisol	Ascomycota	Sordariomycetes	Pathotroph	7.05126	2.3775
Oxidative stress responders	aldehyde dehydrogenase (NAD+)	Fallow	Drought	Luvisol	Ascomycota	Sordariomycetes	Pathotroph-Saprotroph-Symbiotroph	6.37941	4.35319
Oxidative stress responders	aldehyde dehydrogenase (NAD+)	Fallow	Drought	Luvisol	Ascomycota	Sordariomycetes	Pathotroph-Symbiotroph	7.05126	2.3775
Oxidative stress responders	aldehyde dehydrogenase (NAD+)	Fallow	Drought	Luvisol	Ascomycota	Sordariomycetes	Symbiotroph	7.05126	2.3775
Oxidative stress responders	aldehyde dehydrogenase (NAD+)	Fallow	Drought	Luvisol	Ascomycota	Sordariomycetes	Unknown	6.4311	4.15088
Oxidative stress responders	aldehyde dehydrogenase (NAD+)	Fallow	Drought	Phaeozem	Basidiomycota	Agaricomycetes	Pathotroph	3.96922	0
Oxidative stress responders	aldehyde dehydrogenase (NAD+)	Fallow	Drought	Phaeozem	Basidiomycota	Agaricomycetes	Pathotroph-Saprotroph	3.96922	0
Oxidative stress responders	aldehyde dehydrogenase (NAD+)	Fallow	Drought	Phaeozem	Basidiomycota	Agaricomycetes	Pathotroph-Saprotroph	3.96922	0
Oxidative stress responders	aldehyde dehydrogenase (NAD+)	Fallow	Drought	Phaeozem	Basidiomycota	Agaricomycetes	Pathotroph-Saprotroph	3.96922	0
Oxidative stress responders	aldehyde dehydrogenase (NAD+)	Fallow	Drought	Phaeozem	Basidiomycota	Agaricomycetes	Saprotroph	5.98324	0.308112
Oxidative stress responders	aldehyde dehydrogenase (NAD+)	Fallow	Drought	Phaeozem	Basidiomycota	Agaricomycetes	Saprotroph	5.98324	0.308112
Oxidative stress responders	aldehyde dehydrogenase (NAD+)	Fallow	Drought	Phaeozem	Basidiomycota	Agaricomycetes	Symbiotroph	5.98324	0
Oxidative stress responders	aldehyde dehydrogenase (NAD+)	Fallow	Drought	Phaeozem	Basidiomycota	Agaricomycetes	Symbiotroph	5.98324	0
Oxidative stress responders	aldehyde dehydrogenase (NAD+)	Fallow	Drought	Phaeozem	Basidiomycota	Agaricomycetes	Symbiotroph	4.97623	-4.0643
Oxidative stress responders	aldehyde dehydrogenase (NAD+)	Fallow	Drought	Phaeozem	Basidiomycota	Agaricomycetes	Unknown	4.96452	-2.63817
Oxidative stress responders	aldehyde dehydrogenase (NAD+)	Fallow	Drought	Phaeozem	Basidiomycota	Dacrymycetes	Unknown	4.97623	-2.6045
Oxidative stress responders	aldehyde dehydrogenase (NAD+)	Fallow	Drought	Phaeozem	Basidiomycota	Exobasidiomycetes	Unknown	4.97623	-2.6045
Oxidative stress responders	aldehyde dehydrogenase (NAD+)	Fallow	Drought	Phaeozem	Basidiomycota	Microbotryomycetes	Unknown	4.97623	-2.6045
Oxidative stress responders	aldehyde dehydrogenase (NAD+)	Fallow	Drought	Phaeozem	Basidiomycota	Tremellomycetes	Unknown	6.173	-1.07201
Oxidative stress responders	aldehyde dehydrogenase (NAD+)	Fallow	Drought	Phaeozem	Basidiomycota	Ustilaginomycetes	Unknown	4.97623	-2.6045
Oxidative stress responders	aldehyde dehydrogenase (NAD+)	Fallow	Drought	Phaeozem	Mucoromycota	Glomeromycetes	Unknown	4.97623	-2.6045
Oxidative stress responders	aldehyde dehydrogenase (NAD+)	Fallow	Drought	Phaeozem	Mucoromycota	Mucoromycetes	Unknown	4.97623	-2.6045
Oxidative stress responders	aldehyde dehydrogenase (NAD+)	Fallow	Drought	Podzol	Ascomycota	Eurotiomycetes	Pathotroph	5.63281	-0.889269
Oxidative stress responders	aldehyde dehydrogenase (NAD+)	Fallow	Drought	Podzol	Ascomycota	Eurotiomycetes	Pathotroph-Saprotroph	5.63281	-0.889269
Oxidative stress responders	aldehyde dehydrogenase (NAD+)	Fallow	Drought	Podzol	Ascomycota	Eurotiomycetes	Symbiotroph	5.63281	-0.889269
Oxidative stress responders	aldehyde dehydrogenase (NAD+)	Fallow	Drought	Podzol	Ascomycota	Eurotiomycetes	Unknown	6.01454	-0.665137
Oxidative stress responders	aldehyde dehydrogenase (NAD+)	Fallow	Drought	Podzol	Ascomycota	Saccharomycetes	Unknown	5.63281	-0.889269
Oxidative stress responders	aldehyde dehydrogenase (NAD+)	Fallow	Drought	Podzol	Ascomycota	Sordariomycetes	Pathotroph	5.63281	-0.889269
Oxidative stress responders	aldehyde dehydrogenase (NAD+)	Fallow	Drought	Podzol	Ascomycota	Sordariomycetes	Pathotroph	5.63281	-0.889269
Oxidative stress responders	aldehyde dehydrogenase (NAD+)	Fallow	Drought	Podzol	Ascomycota	Sordariomycetes	Pathotroph-Symbiotroph	5.63281	-0.889269
Oxidative stress responders	aldehyde dehydrogenase (NAD+)	Fallow	Drought	Podzol	Ascomycota	Sordariomycetes	Symbiotroph	5.63281	-0.889269
Oxidative stress responders	aldehyde dehydrogenase (NAD+)	Fallow	Drought	Podzol	Ascomycota	Sordariomycetes	Unknown	5.63281	-0.889269
Oxidative stress responders	aldehyde dehydrogenase (NAD+)	Legume/Grass	Drought	Luvisol	Ascomycota	Eurotiomycetes	Pathotroph	6.23704	1.45237
Oxidative stress responders	aldehyde dehydrogenase (NAD+)	Legume/Grass	Drought	Luvisol	Ascomycota	Eurotiomycetes	Pathotroph	6.3514	1.71336
Oxidative stress responders	aldehyde dehydrogenase (NAD+)	Legume/Grass	Drought	Luvisol	Ascomycota	Eurotiomycetes	Pathotroph	6.3514	1.71336
Oxidative stress responders	aldehyde dehydrogenase (NAD+)	Legume/Grass	Drought	Luvisol	Ascomycota	Eurotiomycetes	Pathotroph-Saprotroph	5.88266	0.893091
Oxidative stress responders	aldehyde dehydrogenase (NAD+)	Legume/Grass	Drought	Luvisol	Ascomycota	Eurotiomycetes	Symbiotroph	6.3514	1.95323
Oxidative stress responders	aldehyde dehydrogenase (NAD+)	Legume/Grass	Drought	Luvisol	Ascomycota	Eurotiomycetes	Unknown	5.82703	0.771251
Oxidative stress responders	aldehyde dehydrogenase (NAD+)	Legume/Grass	Drought	Luvisol	Ascomycota	Saccharomycetes	Unknown	5.88266	0.893091
Oxidative stress responders	aldehyde dehydrogenase (NAD+)	Legume/Grass	Drought	Luvisol	Ascomycota	Sordariomycetes	Pathotroph	5.88266	0.893091
Oxidative stress responders	aldehyde dehydrogenase (NAD+)	Legume/Grass	Drought	Luvisol	Ascomycota	Sordariomycetes	Pathotroph	5.88266	0.893091
Oxidative stress responders	aldehyde dehydrogenase (NAD+)	Legume/Grass	Drought	Luvisol	Ascomycota	Sordariomycetes	Pathotroph-Saprotroph-Symbiotroph	7.84557	3.86899
Oxidative stress responders	aldehyde dehydrogenase (NAD+)	Legume/Grass	Drought	Luvisol	Ascomycota	Sordariomycetes	Pathotroph-Symbiotroph	5.88266	0.893091
Oxidative stress responders	aldehyde dehydrogenase (NAD+)	Legume/Grass	Drought	Luvisol	Ascomycota	Sordariomycetes	Symbiotroph	5.88266	0.893091
Oxidative stress responders	aldehyde dehydrogenase (NAD+)	Legume/Grass	Drought	Luvisol	Ascomycota	Sordariomycetes	Unknown	6.26134	1.56286
Oxidative stress responders	aldehyde dehydrogenase (NAD+)	Legume/Grass	Drought	Phaeozem	Basidiomycota	Agaricomycetes	Saprotroph	5.53941	-5.66085
Oxidative stress responders	aldehyde dehydrogenase (NAD+)	Legume/Grass	Drought	Phaeozem	Basidiomycota	Agaricomycetes	Saprotroph	6.56155	-4.18622
Oxidative stress responders	aldehyde dehydrogenase (NAD+)	Legume/Grass	Drought	Phaeozem	Basidiomycota	Agaricomycetes	Saprotroph	6.56155	-4.18622
Oxidative stress responders	aldehyde dehydrogenase (NAD+)	Legume/Grass	Drought	Phaeozem	Basidiomycota	Agaricomycetes	Saprotroph	5.53941	-5.66085
Oxidative stress responders	aldehyde dehydrogenase (NAD+)	Legume/Grass	Drought	Phaeozem	Basidiomycota	Agaricomycetes	Saprotroph	6.56155	-4.18622
Oxidative stress responders	aldehyde dehydrogenase (NAD+)	Legume/Grass	Drought	Phaeozem	Basidiomycota	Agaricomycetes	Symbiotroph	5.53941	0.0887203
Oxidative stress responders	aldehyde dehydrogenase (NAD+)	Legume/Grass	Drought	Phaeozem	Basidiomycota	Agaricomycetes	Unknown	5.52753	-2.71916
Oxidative stress responders	aldehyde dehydrogenase (NAD+)	Legume/Grass	Drought	Phaeozem	Basidiomycota	Dacrymycetes	Unknown	5.53941	-2.78607
Oxidative stress responders	aldehyde dehydrogenase (NAD+)	Legume/Grass	Drought	Phaeozem	Basidiomycota	Exobasidiomycetes	Unknown	5.53941	-2.78607
Oxidative stress responders	aldehyde dehydrogenase (NAD+)	Legume/Grass	Drought	Phaeozem	Basidiomycota	Microbotryomycetes	Unknown	5.53941	-2.78607
Oxidative stress responders	aldehyde dehydrogenase (NAD+)	Legume/Grass	Drought	Phaeozem	Basidiomycota	Tremellomycetes	Unknown	6.18381	-1.48788
Oxidative stress responders	aldehyde dehydrogenase (NAD+)	Legume/Grass	Drought	Phaeozem	Basidiomycota	Ustilaginomycetes	Unknown	5.53941	-2.78607
Oxidative stress responders	aldehyde dehydrogenase (NAD+)	Legume/Grass	Drought	Phaeozem	Mucoromycota	Glomeromycetes	Unknown	5.53941	-2.78607
Oxidative stress responders	aldehyde dehydrogenase (NAD+)	Legume/Grass	Drought	Phaeozem	Mucoromycota	Mucoromycetes	Unknown	5.53941	-2.78607
Oxidative stress responders	aldehyde dehydrogenase (NAD+)	Legume/Grass	Drought	Podzol	Ascomycota	Eurotiomycetes	Pathotroph	6.86386	-1.38271
Oxidative stress responders	aldehyde dehydrogenase (NAD+)	Legume/Grass	Drought	Podzol	Ascomycota	Eurotiomycetes	Pathotroph-Saprotroph	6.86386	-1.38271
Oxidative stress responders	aldehyde dehydrogenase (NAD+)	Legume/Grass	Drought	Podzol	Ascomycota	Eurotiomycetes	Symbiotroph	6.86386	-2.44927
Oxidative stress responders	aldehyde dehydrogenase (NAD+)	Legume/Grass	Drought	Podzol	Ascomycota	Eurotiomycetes	Unknown	7.3699	-0.570611
Oxidative stress responders	aldehyde dehydrogenase (NAD+)	Legume/Grass	Drought	Podzol	Ascomycota	Saccharomycetes	Unknown	6.86386	-1.38271
Oxidative stress responders	aldehyde dehydrogenase (NAD+)	Legume/Grass	Drought	Podzol	Ascomycota	Sordariomycetes	Pathotroph	6.86386	-1.38271
Oxidative stress responders	aldehyde dehydrogenase (NAD+)	Legume/Grass	Drought	Podzol	Ascomycota	Sordariomycetes	Pathotroph	6.86386	-1.38271
Oxidative stress responders	aldehyde dehydrogenase (NAD+)	Legume/Grass	Drought	Podzol	Ascomycota	Sordariomycetes	Pathotroph-Symbiotroph	6.86386	-1.38271
Oxidative stress responders	aldehyde dehydrogenase (NAD+)	Legume/Grass	Drought	Podzol	Ascomycota	Sordariomycetes	Symbiotroph	6.86386	-1.38271
Oxidative stress responders	aldehyde dehydrogenase (NAD+)	Legume/Grass	Drought	Podzol	Ascomycota	Sordariomycetes	Unknown	6.86386	-1.38271
Oxidative stress responders	catalase-peroxidase	Brassica/Grass	Drought	Luvisol	Ascomycota	Dothideomycetes	Saprotroph	8.31784	-2.52313
Oxidative stress responders	catalase-peroxidase	Brassica/Grass	Drought	Luvisol	Ascomycota	Dothideomycetes	Unknown	8.11105	-2.26749
Oxidative stress responders	catalase-peroxidase	Brassica/Grass	Drought	Luvisol	Ascomycota	Eurotiomycetes	Pathotroph	8.31784	-2.52313
Oxidative stress responders	catalase-peroxidase	Brassica/Grass	Drought	Luvisol	Ascomycota	Eurotiomycetes	Pathotroph	8.31784	-2.52313
Oxidative stress responders	catalase-peroxidase	Brassica/Grass	Drought	Luvisol	Ascomycota	Eurotiomycetes	Pathotroph	6.48314	-5.08649
Oxidative stress responders	catalase-peroxidase	Brassica/Grass	Drought	Luvisol	Ascomycota	Eurotiomycetes	Pathotroph	8.31784	-2.52313
Oxidative stress responders	catalase-peroxidase	Brassica/Grass	Drought	Luvisol	Ascomycota	Eurotiomycetes	Pathotroph	8.31784	-2.52313
Oxidative stress responders	catalase-peroxidase	Brassica/Grass	Drought	Luvisol	Ascomycota	Eurotiomycetes	Pathotroph-Saprotroph	8.31784	-2.52313
Oxidative stress responders	catalase-peroxidase	Brassica/Grass	Drought	Luvisol	Ascomycota	Eurotiomycetes	Pathotroph-Saprotroph	8.31784	-2.52313
Oxidative stress responders	catalase-peroxidase	Brassica/Grass	Drought	Luvisol	Ascomycota	Eurotiomycetes	Pathotroph-Saprotroph	8.31784	-2.52313
Oxidative stress responders	catalase-peroxidase	Brassica/Grass	Drought	Luvisol	Ascomycota	Eurotiomycetes	Pathotroph-Saprotroph	8.31784	-2.52313
Oxidative stress responders	catalase-peroxidase	Brassica/Grass	Drought	Luvisol	Ascomycota	Eurotiomycetes	Pathotroph-Saprotroph	8.31784	-2.52313
Oxidative stress responders	catalase-peroxidase	Brassica/Grass	Drought	Luvisol	Ascomycota	Eurotiomycetes	Saprotroph	8.31784	-2.52313
Oxidative stress responders	catalase-peroxidase	Brassica/Grass	Drought	Luvisol	Ascomycota	Eurotiomycetes	Symbiotroph	8.31784	-2.52313
Oxidative stress responders	catalase-peroxidase	Brassica/Grass	Drought	Luvisol	Ascomycota	Eurotiomycetes	Unknown	8.57994	-2.15693
Oxidative stress responders	catalase-peroxidase	Brassica/Grass	Drought	Luvisol	Ascomycota	Lecanoromycetes	Unknown	8.31784	-2.52313
Oxidative stress responders	catalase-peroxidase	Brassica/Grass	Drought	Luvisol	Ascomycota	Leotiomycetes	Pathotroph-Symbiotroph	4.80249	-2.60901
Oxidative stress responders	catalase-peroxidase	Brassica/Grass	Drought	Luvisol	Ascomycota	Leotiomycetes	Unknown	6.92303	-0.682997
Oxidative stress responders	catalase-peroxidase	Brassica/Grass	Drought	Luvisol	Ascomycota	Sordariomycetes	Pathotroph	4.50068	-2.66382
Oxidative stress responders	catalase-peroxidase	Brassica/Grass	Drought	Luvisol	Ascomycota	Sordariomycetes	Pathotroph	4.50068	-2.66382
Oxidative stress responders	catalase-peroxidase	Brassica/Grass	Drought	Luvisol	Ascomycota	Sordariomycetes	Pathotroph	10.1525	0
Oxidative stress responders	catalase-peroxidase	Brassica/Grass	Drought	Luvisol	Ascomycota	Sordariomycetes	Pathotroph	8.31784	-2.50642
Oxidative stress responders	catalase-peroxidase	Brassica/Grass	Drought	Luvisol	Ascomycota	Sordariomycetes	Pathotroph-Saprotroph-Symbiotroph	8.31784	-2.52313
Oxidative stress responders	catalase-peroxidase	Brassica/Grass	Drought	Luvisol	Ascomycota	Sordariomycetes	Pathotroph-Saprotroph-Symbiotroph	8.31784	-2.52313
Oxidative stress responders	catalase-peroxidase	Brassica/Grass	Drought	Luvisol	Ascomycota	Sordariomycetes	Pathotroph-Symbiotroph	10.1525	0
Oxidative stress responders	catalase-peroxidase	Brassica/Grass	Drought	Luvisol	Ascomycota	Sordariomycetes	Pathotroph-Symbiotroph	5.1615	-4.39361
Oxidative stress responders	catalase-peroxidase	Brassica/Grass	Drought	Luvisol	Ascomycota	Sordariomycetes	Symbiotroph	6.40926	-3.48786
Oxidative stress responders	catalase-peroxidase	Brassica/Grass	Drought	Luvisol	Ascomycota	Sordariomycetes	Unknown	7.94126	-2.25787
Oxidative stress responders	catalase-peroxidase	Brassica/Grass	Drought	Luvisol	Basidiomycota	Agaricomycetes	Pathotroph-Saprotroph	5.1016	-0.349194
Oxidative stress responders	catalase-peroxidase	Brassica/Grass	Drought	Luvisol	Basidiomycota	Agaricomycetes	Saprotroph	5.1016	-0.349194
Oxidative stress responders	catalase-peroxidase	Brassica/Grass	Drought	Luvisol	Basidiomycota	Agaricomycetes	Saprotroph	5.1016	-0.349194
Oxidative stress responders	catalase-peroxidase	Brassica/Grass	Drought	Luvisol	Basidiomycota	Agaricomycetes	Unknown	5.05924	0.324347
Oxidative stress responders	catalase-peroxidase	Brassica/Grass	Drought	Phaeozem	Ascomycota	Dothideomycetes	Pathotroph-Symbiotroph	10.1141	-0.800768
Oxidative stress responders	catalase-peroxidase	Brassica/Grass	Drought	Phaeozem	Ascomycota	Dothideomycetes	Unknown	10.897	0.292067
Oxidative stress responders	catalase-peroxidase	Brassica/Grass	Drought	Phaeozem	Ascomycota	Eurotiomycetes	Pathotroph	6.97634	-4.27172
Oxidative stress responders	catalase-peroxidase	Brassica/Grass	Drought	Phaeozem	Ascomycota	Eurotiomycetes	Pathotroph	6.92955	-3.96039
Oxidative stress responders	catalase-peroxidase	Brassica/Grass	Drought	Phaeozem	Ascomycota	Eurotiomycetes	Pathotroph	5.66913	-4.95464
Oxidative stress responders	catalase-peroxidase	Brassica/Grass	Drought	Phaeozem	Ascomycota	Eurotiomycetes	Pathotroph	5.66913	-4.95464
Oxidative stress responders	catalase-peroxidase	Brassica/Grass	Drought	Phaeozem	Ascomycota	Eurotiomycetes	Pathotroph-Saprotroph	6.97634	-4.27172
Oxidative stress responders	catalase-peroxidase	Brassica/Grass	Drought	Phaeozem	Ascomycota	Eurotiomycetes	Pathotroph-Saprotroph	6.97634	-4.27172
Oxidative stress responders	catalase-peroxidase	Brassica/Grass	Drought	Phaeozem	Ascomycota	Eurotiomycetes	Pathotroph-Saprotroph	11.4483	0.667047
Oxidative stress responders	catalase-peroxidase	Brassica/Grass	Drought	Phaeozem	Ascomycota	Eurotiomycetes	Pathotroph-Saprotroph	6.97634	-4.27172
Oxidative stress responders	catalase-peroxidase	Brassica/Grass	Drought	Phaeozem	Ascomycota	Eurotiomycetes	Pathotroph-Saprotroph	6.97634	-4.27172
Oxidative stress responders	catalase-peroxidase	Brassica/Grass	Drought	Phaeozem	Ascomycota	Eurotiomycetes	Saprotroph	6.97634	-4.27172
Oxidative stress responders	catalase-peroxidase	Brassica/Grass	Drought	Phaeozem	Ascomycota	Eurotiomycetes	Symbiotroph	5.66913	-4.95464
Oxidative stress responders	catalase-peroxidase	Brassica/Grass	Drought	Phaeozem	Ascomycota	Eurotiomycetes	Unknown	11.4483	0.667047
Oxidative stress responders	catalase-peroxidase	Brassica/Grass	Drought	Phaeozem	Ascomycota	Lecanoromycetes	Unknown	11.4483	0.667047
Oxidative stress responders	catalase-peroxidase	Brassica/Grass	Drought	Phaeozem	Ascomycota	Leotiomycetes	Pathotroph-Symbiotroph	9.66833	1.75698
Oxidative stress responders	catalase-peroxidase	Brassica/Grass	Drought	Phaeozem	Ascomycota	Leotiomycetes	Saprotroph	10.1141	-0.370622
Oxidative stress responders	catalase-peroxidase	Brassica/Grass	Drought	Phaeozem	Ascomycota	Leotiomycetes	Unknown	8.97397	-0.506191
Oxidative stress responders	catalase-peroxidase	Brassica/Grass	Drought	Phaeozem	Ascomycota	Sordariomycetes	Pathotroph	8.72818	-0.416197
Oxidative stress responders	catalase-peroxidase	Brassica/Grass	Drought	Phaeozem	Ascomycota	Sordariomycetes	Pathotroph	8.72818	0.345707
Oxidative stress responders	catalase-peroxidase	Brassica/Grass	Drought	Phaeozem	Ascomycota	Sordariomycetes	Pathotroph	11.4483	0.667047
Oxidative stress responders	catalase-peroxidase	Brassica/Grass	Drought	Phaeozem	Ascomycota	Sordariomycetes	Pathotroph-Saprotroph-Symbiotroph	11.4483	0.667047
Oxidative stress responders	catalase-peroxidase	Brassica/Grass	Drought	Phaeozem	Ascomycota	Sordariomycetes	Pathotroph-Saprotroph-Symbiotroph	11.4483	-0.581358
Oxidative stress responders	catalase-peroxidase	Brassica/Grass	Drought	Phaeozem	Ascomycota	Sordariomycetes	Pathotroph-Saprotroph-Symbiotroph	11.4483	0.667047
Oxidative stress responders	catalase-peroxidase	Brassica/Grass	Drought	Phaeozem	Ascomycota	Sordariomycetes	Pathotroph-Symbiotroph	9.6349	0.0366856
Oxidative stress responders	catalase-peroxidase	Brassica/Grass	Drought	Phaeozem	Ascomycota	Sordariomycetes	Symbiotroph	9.21855	-1.08109
Oxidative stress responders	catalase-peroxidase	Brassica/Grass	Drought	Phaeozem	Ascomycota	Sordariomycetes	Unknown	10.3661	-0.213638
Oxidative stress responders	catalase-peroxidase	Brassica/Grass	Drought	Phaeozem	Basidiomycota	Agaricomycetes	Unknown	7.47062	-2.95395
Oxidative stress responders	catalase-peroxidase	Brassica/Grass	Drought	Podzol	Ascomycota	Dothideomycetes	Pathotroph-Symbiotroph	8.7978	1.82254
Oxidative stress responders	catalase-peroxidase	Brassica/Grass	Drought	Podzol	Ascomycota	Dothideomycetes	Saprotroph	10.1924	0
Oxidative stress responders	catalase-peroxidase	Brassica/Grass	Drought	Podzol	Ascomycota	Dothideomycetes	Unknown	9.10008	1.14644
Oxidative stress responders	catalase-peroxidase	Brassica/Grass	Drought	Podzol	Ascomycota	Eurotiomycetes	Pathotroph	8.8843	2.36825
Oxidative stress responders	catalase-peroxidase	Brassica/Grass	Drought	Podzol	Ascomycota	Eurotiomycetes	Pathotroph	8.89501	2.42065
Oxidative stress responders	catalase-peroxidase	Brassica/Grass	Drought	Podzol	Ascomycota	Eurotiomycetes	Pathotroph	8.89439	3.03711
Oxidative stress responders	catalase-peroxidase	Brassica/Grass	Drought	Podzol	Ascomycota	Eurotiomycetes	Pathotroph	8.89439	3.03711
Oxidative stress responders	catalase-peroxidase	Brassica/Grass	Drought	Podzol	Ascomycota	Eurotiomycetes	Pathotroph-Saprotroph	8.8843	2.36825
Oxidative stress responders	catalase-peroxidase	Brassica/Grass	Drought	Podzol	Ascomycota	Eurotiomycetes	Pathotroph-Saprotroph	8.8843	2.36825
Oxidative stress responders	catalase-peroxidase	Brassica/Grass	Drought	Podzol	Ascomycota	Eurotiomycetes	Pathotroph-Saprotroph	8.90925	1.09732
Oxidative stress responders	catalase-peroxidase	Brassica/Grass	Drought	Podzol	Ascomycota	Eurotiomycetes	Pathotroph-Saprotroph	8.8843	2.36825
Oxidative stress responders	catalase-peroxidase	Brassica/Grass	Drought	Podzol	Ascomycota	Eurotiomycetes	Pathotroph-Saprotroph	8.8843	2.36825
Oxidative stress responders	catalase-peroxidase	Brassica/Grass	Drought	Podzol	Ascomycota	Eurotiomycetes	Saprotroph	8.8843	2.36825
Oxidative stress responders	catalase-peroxidase	Brassica/Grass	Drought	Podzol	Ascomycota	Eurotiomycetes	Symbiotroph	8.89439	3.03711
Oxidative stress responders	catalase-peroxidase	Brassica/Grass	Drought	Podzol	Ascomycota	Eurotiomycetes	Unknown	8.90925	1.09732
Oxidative stress responders	catalase-peroxidase	Brassica/Grass	Drought	Podzol	Ascomycota	Lecanoromycetes	Unknown	8.90925	1.09732
Oxidative stress responders	catalase-peroxidase	Brassica/Grass	Drought	Podzol	Ascomycota	Leotiomycetes	Pathotroph-Symbiotroph	11.672	0.628544
Oxidative stress responders	catalase-peroxidase	Brassica/Grass	Drought	Podzol	Ascomycota	Leotiomycetes	Saprotroph	8.7978	1.82254
Oxidative stress responders	catalase-peroxidase	Brassica/Grass	Drought	Podzol	Ascomycota	Leotiomycetes	Symbiotroph	10.4738	2.08615
Oxidative stress responders	catalase-peroxidase	Brassica/Grass	Drought	Podzol	Ascomycota	Leotiomycetes	Unknown	9.36266	1.26011
Oxidative stress responders	catalase-peroxidase	Brassica/Grass	Drought	Podzol	Ascomycota	Sordariomycetes	Pathotroph	9.31289	0.875695
Oxidative stress responders	catalase-peroxidase	Brassica/Grass	Drought	Podzol	Ascomycota	Sordariomycetes	Pathotroph	9.31289	0.875695
Oxidative stress responders	catalase-peroxidase	Brassica/Grass	Drought	Podzol	Ascomycota	Sordariomycetes	Pathotroph	10.1924	2.94849
Oxidative stress responders	catalase-peroxidase	Brassica/Grass	Drought	Podzol	Ascomycota	Sordariomycetes	Pathotroph	8.90925	1.24479
Oxidative stress responders	catalase-peroxidase	Brassica/Grass	Drought	Podzol	Ascomycota	Sordariomycetes	Pathotroph-Saprotroph-Symbiotroph	8.90925	1.09732
Oxidative stress responders	catalase-peroxidase	Brassica/Grass	Drought	Podzol	Ascomycota	Sordariomycetes	Pathotroph-Saprotroph-Symbiotroph	8.90925	1.09732
Oxidative stress responders	catalase-peroxidase	Brassica/Grass	Drought	Podzol	Ascomycota	Sordariomycetes	Pathotroph-Saprotroph-Symbiotroph	8.90925	1.09732
Oxidative stress responders	catalase-peroxidase	Brassica/Grass	Drought	Podzol	Ascomycota	Sordariomycetes	Pathotroph-Symbiotroph	9.31289	0.875695
Oxidative stress responders	catalase-peroxidase	Brassica/Grass	Drought	Podzol	Ascomycota	Sordariomycetes	Symbiotroph	9.02178	1.43327
Oxidative stress responders	catalase-peroxidase	Brassica/Grass	Drought	Podzol	Ascomycota	Sordariomycetes	Unknown	9.1504	1.19921
Oxidative stress responders	catalase-peroxidase	Brassica/Grass	Drought	Podzol	Basidiomycota	Agaricomycetes	Pathotroph-Saprotroph	11.1838	0
Oxidative stress responders	catalase-peroxidase	Brassica/Grass	Drought	Podzol	Basidiomycota	Agaricomycetes	Saprotroph	11.1838	0
Oxidative stress responders	catalase-peroxidase	Brassica/Grass	Drought	Podzol	Basidiomycota	Agaricomycetes	Saprotroph	11.1838	0
Oxidative stress responders	catalase-peroxidase	Brassica/Grass	Drought	Podzol	Basidiomycota	Agaricomycetes	Unknown	11.3452	1.69189
Oxidative stress responders	catalase-peroxidase	Fallow	Drought	Luvisol	Ascomycota	Dothideomycetes	Saprotroph	7.03117	-2.98439
Oxidative stress responders	catalase-peroxidase	Fallow	Drought	Luvisol	Ascomycota	Dothideomycetes	Unknown	6.89505	-2.68188
Oxidative stress responders	catalase-peroxidase	Fallow	Drought	Luvisol	Ascomycota	Eurotiomycetes	Pathotroph	7.03117	-2.98439
Oxidative stress responders	catalase-peroxidase	Fallow	Drought	Luvisol	Ascomycota	Eurotiomycetes	Pathotroph	7.03117	-2.98439
Oxidative stress responders	catalase-peroxidase	Fallow	Drought	Luvisol	Ascomycota	Eurotiomycetes	Pathotroph	7.03117	-2.98439
Oxidative stress responders	catalase-peroxidase	Fallow	Drought	Luvisol	Ascomycota	Eurotiomycetes	Pathotroph	7.03117	-2.98439
Oxidative stress responders	catalase-peroxidase	Fallow	Drought	Luvisol	Ascomycota	Eurotiomycetes	Pathotroph-Saprotroph	7.03117	-2.98439
Oxidative stress responders	catalase-peroxidase	Fallow	Drought	Luvisol	Ascomycota	Eurotiomycetes	Pathotroph-Saprotroph	7.03117	-2.98439
Oxidative stress responders	catalase-peroxidase	Fallow	Drought	Luvisol	Ascomycota	Eurotiomycetes	Pathotroph-Saprotroph	7.03117	-2.98439
Oxidative stress responders	catalase-peroxidase	Fallow	Drought	Luvisol	Ascomycota	Eurotiomycetes	Pathotroph-Saprotroph	7.03117	-2.98439
Oxidative stress responders	catalase-peroxidase	Fallow	Drought	Luvisol	Ascomycota	Eurotiomycetes	Pathotroph-Saprotroph	7.03117	-2.98439
Oxidative stress responders	catalase-peroxidase	Fallow	Drought	Luvisol	Ascomycota	Eurotiomycetes	Saprotroph	7.03117	-2.98439
Oxidative stress responders	catalase-peroxidase	Fallow	Drought	Luvisol	Ascomycota	Eurotiomycetes	Symbiotroph	7.03117	-2.98439
Oxidative stress responders	catalase-peroxidase	Fallow	Drought	Luvisol	Ascomycota	Eurotiomycetes	Unknown	7.03117	-2.98439
Oxidative stress responders	catalase-peroxidase	Fallow	Drought	Luvisol	Ascomycota	Lecanoromycetes	Unknown	7.03117	-2.98439
Oxidative stress responders	catalase-peroxidase	Fallow	Drought	Luvisol	Ascomycota	Leotiomycetes	Pathotroph-Symbiotroph	5.80611	-0.261847
Oxidative stress responders	catalase-peroxidase	Fallow	Drought	Luvisol	Ascomycota	Leotiomycetes	Unknown	6.21933	-1.23854
Oxidative stress responders	catalase-peroxidase	Fallow	Drought	Luvisol	Ascomycota	Sordariomycetes	Pathotroph	5.82079	-0.494325
Oxidative stress responders	catalase-peroxidase	Fallow	Drought	Luvisol	Ascomycota	Sordariomycetes	Pathotroph	5.82079	-0.494325
Oxidative stress responders	catalase-peroxidase	Fallow	Drought	Luvisol	Ascomycota	Sordariomycetes	Pathotroph	7.49045	-1.92736
Oxidative stress responders	catalase-peroxidase	Fallow	Drought	Luvisol	Ascomycota	Sordariomycetes	Pathotroph-Saprotroph-Symbiotroph	7.03117	-2.98439
Oxidative stress responders	catalase-peroxidase	Fallow	Drought	Luvisol	Ascomycota	Sordariomycetes	Pathotroph-Saprotroph-Symbiotroph	7.03117	-1.01231
Oxidative stress responders	catalase-peroxidase	Fallow	Drought	Luvisol	Ascomycota	Sordariomycetes	Pathotroph-Saprotroph-Symbiotroph	7.03117	-2.98439
Oxidative stress responders	catalase-peroxidase	Fallow	Drought	Luvisol	Ascomycota	Sordariomycetes	Pathotroph-Symbiotroph	6.98972	0.437357
Oxidative stress responders	catalase-peroxidase	Fallow	Drought	Luvisol	Ascomycota	Sordariomycetes	Symbiotroph	7.0063	-0.93134
Oxidative stress responders	catalase-peroxidase	Fallow	Drought	Luvisol	Ascomycota	Sordariomycetes	Unknown	6.75168	-2.83141
Oxidative stress responders	catalase-peroxidase	Fallow	Drought	Luvisol	Basidiomycota	Agaricomycetes	Unknown	4.23633	0.472706
Oxidative stress responders	catalase-peroxidase	Fallow	Drought	Phaeozem	Ascomycota	Dothideomycetes	Pathotroph-Symbiotroph	10.3057	-0.403611
Oxidative stress responders	catalase-peroxidase	Fallow	Drought	Phaeozem	Ascomycota	Dothideomycetes	Unknown	8.50222	0.347483
Oxidative stress responders	catalase-peroxidase	Fallow	Drought	Phaeozem	Ascomycota	Eurotiomycetes	Pathotroph	5.25333	-4.04122
Oxidative stress responders	catalase-peroxidase	Fallow	Drought	Phaeozem	Ascomycota	Eurotiomycetes	Pathotroph	8.22337	0.871019
Oxidative stress responders	catalase-peroxidase	Fallow	Drought	Phaeozem	Ascomycota	Eurotiomycetes	Pathotroph	6.90175	-0.440073
Oxidative stress responders	catalase-peroxidase	Fallow	Drought	Phaeozem	Ascomycota	Eurotiomycetes	Pathotroph	6.90175	-0.440073
Oxidative stress responders	catalase-peroxidase	Fallow	Drought	Phaeozem	Ascomycota	Eurotiomycetes	Pathotroph-Saprotroph	5.25333	-4.04122
Oxidative stress responders	catalase-peroxidase	Fallow	Drought	Phaeozem	Ascomycota	Eurotiomycetes	Pathotroph-Saprotroph	5.25333	-4.04122
Oxidative stress responders	catalase-peroxidase	Fallow	Drought	Phaeozem	Ascomycota	Eurotiomycetes	Pathotroph-Saprotroph	8.10179	-0.0813367
Oxidative stress responders	catalase-peroxidase	Fallow	Drought	Phaeozem	Ascomycota	Eurotiomycetes	Pathotroph-Saprotroph	5.25333	-4.04122
Oxidative stress responders	catalase-peroxidase	Fallow	Drought	Phaeozem	Ascomycota	Eurotiomycetes	Pathotroph-Saprotroph	5.25333	-4.04122
Oxidative stress responders	catalase-peroxidase	Fallow	Drought	Phaeozem	Ascomycota	Eurotiomycetes	Saprotroph	5.25333	-4.04122
Oxidative stress responders	catalase-peroxidase	Fallow	Drought	Phaeozem	Ascomycota	Eurotiomycetes	Symbiotroph	6.90175	-0.440073
Oxidative stress responders	catalase-peroxidase	Fallow	Drought	Phaeozem	Ascomycota	Eurotiomycetes	Unknown	7.96566	-0.277724
Oxidative stress responders	catalase-peroxidase	Fallow	Drought	Phaeozem	Ascomycota	Lecanoromycetes	Unknown	8.10179	-0.0813367
Oxidative stress responders	catalase-peroxidase	Fallow	Drought	Phaeozem	Ascomycota	Leotiomycetes	Pathotroph-Symbiotroph	10.4666	2.93818
Oxidative stress responders	catalase-peroxidase	Fallow	Drought	Phaeozem	Ascomycota	Leotiomycetes	Saprotroph	10.3057	1.48723
Oxidative stress responders	catalase-peroxidase	Fallow	Drought	Phaeozem	Ascomycota	Leotiomycetes	Unknown	8.97369	1.3673
Oxidative stress responders	catalase-peroxidase	Fallow	Drought	Phaeozem	Ascomycota	Sordariomycetes	Pathotroph	9.97402	2.83575
Oxidative stress responders	catalase-peroxidase	Fallow	Drought	Phaeozem	Ascomycota	Sordariomycetes	Pathotroph	9.61384	2.31611
Oxidative stress responders	catalase-peroxidase	Fallow	Drought	Phaeozem	Ascomycota	Sordariomycetes	Pathotroph	8.10179	-0.0813367
Oxidative stress responders	catalase-peroxidase	Fallow	Drought	Phaeozem	Ascomycota	Sordariomycetes	Pathotroph-Saprotroph-Symbiotroph	8.10179	-0.0813367
Oxidative stress responders	catalase-peroxidase	Fallow	Drought	Phaeozem	Ascomycota	Sordariomycetes	Pathotroph-Saprotroph-Symbiotroph	8.10179	-4.59205
Oxidative stress responders	catalase-peroxidase	Fallow	Drought	Phaeozem	Ascomycota	Sordariomycetes	Pathotroph-Saprotroph-Symbiotroph	8.10179	-0.0813367
Oxidative stress responders	catalase-peroxidase	Fallow	Drought	Phaeozem	Ascomycota	Sordariomycetes	Pathotroph-Symbiotroph	10.1586	1.5265
Oxidative stress responders	catalase-peroxidase	Fallow	Drought	Phaeozem	Ascomycota	Sordariomycetes	Symbiotroph	8.70483	-0.444707
Oxidative stress responders	catalase-peroxidase	Fallow	Drought	Phaeozem	Ascomycota	Sordariomycetes	Unknown	8.55585	0.616201
Oxidative stress responders	catalase-peroxidase	Fallow	Drought	Phaeozem	Basidiomycota	Agaricomycetes	Unknown	4.44354	-1.50523
Oxidative stress responders	catalase-peroxidase	Fallow	Drought	Podzol	Ascomycota	Dothideomycetes	Pathotroph-Symbiotroph	7.68482	-2.95652
Oxidative stress responders	catalase-peroxidase	Fallow	Drought	Podzol	Ascomycota	Dothideomycetes	Saprotroph	7.87929	2.11644
Oxidative stress responders	catalase-peroxidase	Fallow	Drought	Podzol	Ascomycota	Dothideomycetes	Unknown	7.184	-2.06784
Oxidative stress responders	catalase-peroxidase	Fallow	Drought	Podzol	Ascomycota	Eurotiomycetes	Pathotroph	6.92373	-2.33669
Oxidative stress responders	catalase-peroxidase	Fallow	Drought	Podzol	Ascomycota	Eurotiomycetes	Pathotroph	6.82949	-2.25994
Oxidative stress responders	catalase-peroxidase	Fallow	Drought	Podzol	Ascomycota	Eurotiomycetes	Pathotroph	6.83494	-2.26438
Oxidative stress responders	catalase-peroxidase	Fallow	Drought	Podzol	Ascomycota	Eurotiomycetes	Pathotroph	6.83494	-2.26438
Oxidative stress responders	catalase-peroxidase	Fallow	Drought	Podzol	Ascomycota	Eurotiomycetes	Pathotroph-Saprotroph	6.92373	-2.33669
Oxidative stress responders	catalase-peroxidase	Fallow	Drought	Podzol	Ascomycota	Eurotiomycetes	Pathotroph-Saprotroph	6.92373	-2.33669
Oxidative stress responders	catalase-peroxidase	Fallow	Drought	Podzol	Ascomycota	Eurotiomycetes	Pathotroph-Saprotroph	6.70419	-2.1579
Oxidative stress responders	catalase-peroxidase	Fallow	Drought	Podzol	Ascomycota	Eurotiomycetes	Pathotroph-Saprotroph	6.92373	-2.33669
Oxidative stress responders	catalase-peroxidase	Fallow	Drought	Podzol	Ascomycota	Eurotiomycetes	Pathotroph-Saprotroph	6.92373	-2.33669
Oxidative stress responders	catalase-peroxidase	Fallow	Drought	Podzol	Ascomycota	Eurotiomycetes	Saprotroph	6.92373	-2.33669
Oxidative stress responders	catalase-peroxidase	Fallow	Drought	Podzol	Ascomycota	Eurotiomycetes	Symbiotroph	6.83494	-2.26438
Oxidative stress responders	catalase-peroxidase	Fallow	Drought	Podzol	Ascomycota	Eurotiomycetes	Unknown	6.70419	-2.1579
Oxidative stress responders	catalase-peroxidase	Fallow	Drought	Podzol	Ascomycota	Lecanoromycetes	Unknown	6.70419	-2.1579
Oxidative stress responders	catalase-peroxidase	Fallow	Drought	Podzol	Ascomycota	Leotiomycetes	Pathotroph-Symbiotroph	11.6664	0.687087
Oxidative stress responders	catalase-peroxidase	Fallow	Drought	Podzol	Ascomycota	Leotiomycetes	Saprotroph	7.68482	-2.95652
Oxidative stress responders	catalase-peroxidase	Fallow	Drought	Podzol	Ascomycota	Leotiomycetes	Symbiotroph	8.46936	-2.58953
Oxidative stress responders	catalase-peroxidase	Fallow	Drought	Podzol	Ascomycota	Leotiomycetes	Unknown	7.79339	-1.87407
Oxidative stress responders	catalase-peroxidase	Fallow	Drought	Podzol	Ascomycota	Sordariomycetes	Pathotroph	9.00277	-0.903259
Oxidative stress responders	catalase-peroxidase	Fallow	Drought	Podzol	Ascomycota	Sordariomycetes	Pathotroph	8.5029	-1.62442
Oxidative stress responders	catalase-peroxidase	Fallow	Drought	Podzol	Ascomycota	Sordariomycetes	Pathotroph	6.70419	-2.1579
Oxidative stress responders	catalase-peroxidase	Fallow	Drought	Podzol	Ascomycota	Sordariomycetes	Pathotroph	6.70419	-2.1579
Oxidative stress responders	catalase-peroxidase	Fallow	Drought	Podzol	Ascomycota	Sordariomycetes	Pathotroph-Saprotroph	7.87929	0
Oxidative stress responders	catalase-peroxidase	Fallow	Drought	Podzol	Ascomycota	Sordariomycetes	Pathotroph-Saprotroph-Symbiotroph	6.70419	-2.1579
Oxidative stress responders	catalase-peroxidase	Fallow	Drought	Podzol	Ascomycota	Sordariomycetes	Pathotroph-Saprotroph-Symbiotroph	6.70419	-2.1579
Oxidative stress responders	catalase-peroxidase	Fallow	Drought	Podzol	Ascomycota	Sordariomycetes	Pathotroph-Saprotroph-Symbiotroph	6.70419	-2.1579
Oxidative stress responders	catalase-peroxidase	Fallow	Drought	Podzol	Ascomycota	Sordariomycetes	Pathotroph-Symbiotroph	8.5029	-1.62442
Oxidative stress responders	catalase-peroxidase	Fallow	Drought	Podzol	Ascomycota	Sordariomycetes	Saprotroph	7.87929	0
Oxidative stress responders	catalase-peroxidase	Fallow	Drought	Podzol	Ascomycota	Sordariomycetes	Symbiotroph	7.49746	-2.13782
Oxidative stress responders	catalase-peroxidase	Fallow	Drought	Podzol	Ascomycota	Sordariomycetes	Unknown	7.33647	-2.03945
Oxidative stress responders	catalase-peroxidase	Fallow	Drought	Podzol	Basidiomycota	Agaricomycetes	Unknown	7.53434	-2.82211
Oxidative stress responders	catalase-peroxidase	Legume/Grass	Drought	Luvisol	Ascomycota	Dothideomycetes	Saprotroph	4.49017	-4.06021
Oxidative stress responders	catalase-peroxidase	Legume/Grass	Drought	Luvisol	Ascomycota	Dothideomycetes	Unknown	6.4606	-1.3209
Oxidative stress responders	catalase-peroxidase	Legume/Grass	Drought	Luvisol	Ascomycota	Eurotiomycetes	Pathotroph	6.48445	-1.18307
Oxidative stress responders	catalase-peroxidase	Legume/Grass	Drought	Luvisol	Ascomycota	Eurotiomycetes	Pathotroph	6.48445	-1.18307
Oxidative stress responders	catalase-peroxidase	Legume/Grass	Drought	Luvisol	Ascomycota	Eurotiomycetes	Pathotroph	6.48445	-1.18307
Oxidative stress responders	catalase-peroxidase	Legume/Grass	Drought	Luvisol	Ascomycota	Eurotiomycetes	Pathotroph	6.48445	-1.18307
Oxidative stress responders	catalase-peroxidase	Legume/Grass	Drought	Luvisol	Ascomycota	Eurotiomycetes	Pathotroph-Saprotroph	6.48445	-1.18307
Oxidative stress responders	catalase-peroxidase	Legume/Grass	Drought	Luvisol	Ascomycota	Eurotiomycetes	Pathotroph-Saprotroph	6.48445	-1.18307
Oxidative stress responders	catalase-peroxidase	Legume/Grass	Drought	Luvisol	Ascomycota	Eurotiomycetes	Pathotroph-Saprotroph	6.48445	-1.18307
Oxidative stress responders	catalase-peroxidase	Legume/Grass	Drought	Luvisol	Ascomycota	Eurotiomycetes	Pathotroph-Saprotroph	6.48445	-1.18307
Oxidative stress responders	catalase-peroxidase	Legume/Grass	Drought	Luvisol	Ascomycota	Eurotiomycetes	Pathotroph-Saprotroph	6.48445	-1.18307
Oxidative stress responders	catalase-peroxidase	Legume/Grass	Drought	Luvisol	Ascomycota	Eurotiomycetes	Saprotroph	6.48445	-1.18307
Oxidative stress responders	catalase-peroxidase	Legume/Grass	Drought	Luvisol	Ascomycota	Eurotiomycetes	Symbiotroph	6.48445	-1.18307
Oxidative stress responders	catalase-peroxidase	Legume/Grass	Drought	Luvisol	Ascomycota	Eurotiomycetes	Unknown	6.48445	-1.18307
Oxidative stress responders	catalase-peroxidase	Legume/Grass	Drought	Luvisol	Ascomycota	Lecanoromycetes	Unknown	6.48445	-1.18307
Oxidative stress responders	catalase-peroxidase	Legume/Grass	Drought	Luvisol	Ascomycota	Leotiomycetes	Pathotroph-Symbiotroph	6.01757	-2.78751
Oxidative stress responders	catalase-peroxidase	Legume/Grass	Drought	Luvisol	Ascomycota	Leotiomycetes	Unknown	6.1133	-2.05596
Oxidative stress responders	catalase-peroxidase	Legume/Grass	Drought	Luvisol	Ascomycota	Sordariomycetes	Pathotroph	5.40937	-3.33465
Oxidative stress responders	catalase-peroxidase	Legume/Grass	Drought	Luvisol	Ascomycota	Sordariomycetes	Pathotroph	5.40937	-3.33465
Oxidative stress responders	catalase-peroxidase	Legume/Grass	Drought	Luvisol	Ascomycota	Sordariomycetes	Pathotroph	6.76935	-0.772047
Oxidative stress responders	catalase-peroxidase	Legume/Grass	Drought	Luvisol	Ascomycota	Sordariomycetes	Pathotroph-Saprotroph-Symbiotroph	6.48445	-1.18307
Oxidative stress responders	catalase-peroxidase	Legume/Grass	Drought	Luvisol	Ascomycota	Sordariomycetes	Pathotroph-Saprotroph-Symbiotroph	4.49017	-4.06021
Oxidative stress responders	catalase-peroxidase	Legume/Grass	Drought	Luvisol	Ascomycota	Sordariomycetes	Pathotroph-Saprotroph-Symbiotroph	6.48445	-1.18307
Oxidative stress responders	catalase-peroxidase	Legume/Grass	Drought	Luvisol	Ascomycota	Sordariomycetes	Pathotroph-Symbiotroph	5.94691	-2.25886
Oxidative stress responders	catalase-peroxidase	Legume/Grass	Drought	Luvisol	Ascomycota	Sordariomycetes	Symbiotroph	6.12609	-1.90026
Oxidative stress responders	catalase-peroxidase	Legume/Grass	Drought	Luvisol	Ascomycota	Sordariomycetes	Symbiotroph	6.48445	0
Oxidative stress responders	catalase-peroxidase	Legume/Grass	Drought	Luvisol	Ascomycota	Sordariomycetes	Unknown	6.38143	-1.45826
Oxidative stress responders	catalase-peroxidase	Legume/Grass	Drought	Luvisol	Basidiomycota	Agaricomycetes	Unknown	4.9359	-0.184954
Oxidative stress responders	catalase-peroxidase	Legume/Grass	Drought	Phaeozem	Ascomycota	Dothideomycetes	Pathotroph-Symbiotroph	10.0048	-0.192704
Oxidative stress responders	catalase-peroxidase	Legume/Grass	Drought	Phaeozem	Ascomycota	Dothideomycetes	Unknown	10.7483	0.521055
Oxidative stress responders	catalase-peroxidase	Legume/Grass	Drought	Phaeozem	Ascomycota	Eurotiomycetes	Pathotroph	8.66814	0.873406
Oxidative stress responders	catalase-peroxidase	Legume/Grass	Drought	Phaeozem	Ascomycota	Eurotiomycetes	Pathotroph	8.41998	-0.96982
Oxidative stress responders	catalase-peroxidase	Legume/Grass	Drought	Phaeozem	Ascomycota	Eurotiomycetes	Pathotroph	6.55964	-2.64141
Oxidative stress responders	catalase-peroxidase	Legume/Grass	Drought	Phaeozem	Ascomycota	Eurotiomycetes	Pathotroph	6.55964	-2.64141
Oxidative stress responders	catalase-peroxidase	Legume/Grass	Drought	Phaeozem	Ascomycota	Eurotiomycetes	Pathotroph-Saprotroph	8.66814	0.873406
Oxidative stress responders	catalase-peroxidase	Legume/Grass	Drought	Phaeozem	Ascomycota	Eurotiomycetes	Pathotroph-Saprotroph	8.66814	0.873406
Oxidative stress responders	catalase-peroxidase	Legume/Grass	Drought	Phaeozem	Ascomycota	Eurotiomycetes	Pathotroph-Saprotroph	10.933	0.407189
Oxidative stress responders	catalase-peroxidase	Legume/Grass	Drought	Phaeozem	Ascomycota	Eurotiomycetes	Pathotroph-Saprotroph	8.66814	0.873406
Oxidative stress responders	catalase-peroxidase	Legume/Grass	Drought	Phaeozem	Ascomycota	Eurotiomycetes	Pathotroph-Saprotroph	8.66814	0.873406
Oxidative stress responders	catalase-peroxidase	Legume/Grass	Drought	Phaeozem	Ascomycota	Eurotiomycetes	Saprotroph	8.66814	0.873406
Oxidative stress responders	catalase-peroxidase	Legume/Grass	Drought	Phaeozem	Ascomycota	Eurotiomycetes	Symbiotroph	6.55964	-2.64141
Oxidative stress responders	catalase-peroxidase	Legume/Grass	Drought	Phaeozem	Ascomycota	Eurotiomycetes	Unknown	10.933	0.445467
Oxidative stress responders	catalase-peroxidase	Legume/Grass	Drought	Phaeozem	Ascomycota	Lecanoromycetes	Unknown	10.933	0.407189
Oxidative stress responders	catalase-peroxidase	Legume/Grass	Drought	Phaeozem	Ascomycota	Leotiomycetes	Pathotroph-Symbiotroph	10.2117	2.14157
Oxidative stress responders	catalase-peroxidase	Legume/Grass	Drought	Phaeozem	Ascomycota	Leotiomycetes	Saprotroph	10.0048	-0.192704
Oxidative stress responders	catalase-peroxidase	Legume/Grass	Drought	Phaeozem	Ascomycota	Leotiomycetes	Unknown	9.79269	0.765856
Oxidative stress responders	catalase-peroxidase	Legume/Grass	Drought	Phaeozem	Ascomycota	Sordariomycetes	Pathotroph	9.55099	2.7516
Oxidative stress responders	catalase-peroxidase	Legume/Grass	Drought	Phaeozem	Ascomycota	Sordariomycetes	Pathotroph	9.55099	2.7516
Oxidative stress responders	catalase-peroxidase	Legume/Grass	Drought	Phaeozem	Ascomycota	Sordariomycetes	Pathotroph	10.933	0.407189
Oxidative stress responders	catalase-peroxidase	Legume/Grass	Drought	Phaeozem	Ascomycota	Sordariomycetes	Pathotroph-Saprotroph-Symbiotroph	10.933	0.407189
Oxidative stress responders	catalase-peroxidase	Legume/Grass	Drought	Phaeozem	Ascomycota	Sordariomycetes	Pathotroph-Saprotroph-Symbiotroph	11.7356	1.56516
Oxidative stress responders	catalase-peroxidase	Legume/Grass	Drought	Phaeozem	Ascomycota	Sordariomycetes	Pathotroph-Saprotroph-Symbiotroph	10.933	0.407189
Oxidative stress responders	catalase-peroxidase	Legume/Grass	Drought	Phaeozem	Ascomycota	Sordariomycetes	Pathotroph-Symbiotroph	10.242	1.57939
Oxidative stress responders	catalase-peroxidase	Legume/Grass	Drought	Phaeozem	Ascomycota	Sordariomycetes	Symbiotroph	9.64098	1.07841
Oxidative stress responders	catalase-peroxidase	Legume/Grass	Drought	Phaeozem	Ascomycota	Sordariomycetes	Unknown	10.523	0.383758
Oxidative stress responders	catalase-peroxidase	Legume/Grass	Drought	Phaeozem	Basidiomycota	Agaricomycetes	Unknown	6.08	-1.52419
Oxidative stress responders	catalase-peroxidase	Legume/Grass	Drought	Podzol	Ascomycota	Dothideomycetes	Pathotroph-Symbiotroph	7.11911	-3.27537
Oxidative stress responders	catalase-peroxidase	Legume/Grass	Drought	Podzol	Ascomycota	Dothideomycetes	Saprotroph	8.88469	-2.35126
Oxidative stress responders	catalase-peroxidase	Legume/Grass	Drought	Podzol	Ascomycota	Dothideomycetes	Unknown	7.57662	-0.890893
Oxidative stress responders	catalase-peroxidase	Legume/Grass	Drought	Podzol	Ascomycota	Eurotiomycetes	Pathotroph	6.93226	-1.07547
Oxidative stress responders	catalase-peroxidase	Legume/Grass	Drought	Podzol	Ascomycota	Eurotiomycetes	Pathotroph	7.06682	-0.59759
Oxidative stress responders	catalase-peroxidase	Legume/Grass	Drought	Podzol	Ascomycota	Eurotiomycetes	Pathotroph	7.05904	-0.187836
Oxidative stress responders	catalase-peroxidase	Legume/Grass	Drought	Podzol	Ascomycota	Eurotiomycetes	Pathotroph	7.05904	-0.187836
Oxidative stress responders	catalase-peroxidase	Legume/Grass	Drought	Podzol	Ascomycota	Eurotiomycetes	Pathotroph-Saprotroph	6.93226	-1.07547
Oxidative stress responders	catalase-peroxidase	Legume/Grass	Drought	Podzol	Ascomycota	Eurotiomycetes	Pathotroph-Saprotroph	6.93226	-1.07547
Oxidative stress responders	catalase-peroxidase	Legume/Grass	Drought	Podzol	Ascomycota	Eurotiomycetes	Pathotroph-Saprotroph	7.24571	-0.998436
Oxidative stress responders	catalase-peroxidase	Legume/Grass	Drought	Podzol	Ascomycota	Eurotiomycetes	Pathotroph-Saprotroph	6.93226	-1.07547
Oxidative stress responders	catalase-peroxidase	Legume/Grass	Drought	Podzol	Ascomycota	Eurotiomycetes	Pathotroph-Saprotroph	6.93226	-1.07547
Oxidative stress responders	catalase-peroxidase	Legume/Grass	Drought	Podzol	Ascomycota	Eurotiomycetes	Saprotroph	6.93226	-1.07547
Oxidative stress responders	catalase-peroxidase	Legume/Grass	Drought	Podzol	Ascomycota	Eurotiomycetes	Symbiotroph	7.05904	-0.187836
Oxidative stress responders	catalase-peroxidase	Legume/Grass	Drought	Podzol	Ascomycota	Eurotiomycetes	Unknown	7.24571	-0.467383
Oxidative stress responders	catalase-peroxidase	Legume/Grass	Drought	Podzol	Ascomycota	Lecanoromycetes	Unknown	7.24571	-0.998436
Oxidative stress responders	catalase-peroxidase	Legume/Grass	Drought	Podzol	Ascomycota	Leotiomycetes	Pathotroph-Symbiotroph	9.54212	2.41945
Oxidative stress responders	catalase-peroxidase	Legume/Grass	Drought	Podzol	Ascomycota	Leotiomycetes	Saprotroph	7.11911	-3.27537
Oxidative stress responders	catalase-peroxidase	Legume/Grass	Drought	Podzol	Ascomycota	Leotiomycetes	Symbiotroph	7.47856	-0.279221
Oxidative stress responders	catalase-peroxidase	Legume/Grass	Drought	Podzol	Ascomycota	Leotiomycetes	Symbiotroph	5.52213	2.81048
Oxidative stress responders	catalase-peroxidase	Legume/Grass	Drought	Podzol	Ascomycota	Leotiomycetes	Unknown	8.30618	-0.458313
Oxidative stress responders	catalase-peroxidase	Legume/Grass	Drought	Podzol	Ascomycota	Sordariomycetes	Pathotroph	8.33008	2.41735
Oxidative stress responders	catalase-peroxidase	Legume/Grass	Drought	Podzol	Ascomycota	Sordariomycetes	Pathotroph	7.92295	1.82999
Oxidative stress responders	catalase-peroxidase	Legume/Grass	Drought	Podzol	Ascomycota	Sordariomycetes	Pathotroph	7.24571	-0.998436
Oxidative stress responders	catalase-peroxidase	Legume/Grass	Drought	Podzol	Ascomycota	Sordariomycetes	Pathotroph	7.24571	-0.998436
Oxidative stress responders	catalase-peroxidase	Legume/Grass	Drought	Podzol	Ascomycota	Sordariomycetes	Pathotroph-Saprotroph	8.88469	0
Oxidative stress responders	catalase-peroxidase	Legume/Grass	Drought	Podzol	Ascomycota	Sordariomycetes	Pathotroph-Saprotroph-Symbiotroph	7.24571	-0.998436
Oxidative stress responders	catalase-peroxidase	Legume/Grass	Drought	Podzol	Ascomycota	Sordariomycetes	Pathotroph-Saprotroph-Symbiotroph	7.24571	-0.998436
Oxidative stress responders	catalase-peroxidase	Legume/Grass	Drought	Podzol	Ascomycota	Sordariomycetes	Pathotroph-Saprotroph-Symbiotroph	7.24571	-0.998436
Oxidative stress responders	catalase-peroxidase	Legume/Grass	Drought	Podzol	Ascomycota	Sordariomycetes	Pathotroph-Symbiotroph	7.92295	1.82999
Oxidative stress responders	catalase-peroxidase	Legume/Grass	Drought	Podzol	Ascomycota	Sordariomycetes	Saprotroph	8.88469	0
Oxidative stress responders	catalase-peroxidase	Legume/Grass	Drought	Podzol	Ascomycota	Sordariomycetes	Symbiotroph	7.32135	-0.457221
Oxidative stress responders	catalase-peroxidase	Legume/Grass	Drought	Podzol	Ascomycota	Sordariomycetes	Unknown	7.61384	-0.9783
Oxidative stress responders	catalase-peroxidase	Legume/Grass	Drought	Podzol	Basidiomycota	Agaricomycetes	Pathotroph-Saprotroph	11.3831	0
Oxidative stress responders	catalase-peroxidase	Legume/Grass	Drought	Podzol	Basidiomycota	Agaricomycetes	Saprotroph	11.3831	0
Oxidative stress responders	catalase-peroxidase	Legume/Grass	Drought	Podzol	Basidiomycota	Agaricomycetes	Saprotroph	11.3831	0
Oxidative stress responders	superoxide dismutase	Brassica/Grass	Drought	Phaeozem	Ascomycota	Sordariomycetes	Unknown	5.12838	1.34121
Oxidative stress responders	superoxide dismutase	Fallow	Drought	Phaeozem	Ascomycota	Sordariomycetes	Unknown	7.23224	5.23031
Oxidative stress responders	superoxide dismutase	Legume/Grass	Drought	Phaeozem	Ascomycota	Sordariomycetes	Unknown	6.69703	4.19283
Pentose phosphate pathway	6-phosphogluconolactonase	Brassica/Grass	Drought	Podzol	Ascomycota	Eurotiomycetes	Pathotroph	9.34711	-0.556624
Pentose phosphate pathway	6-phosphogluconolactonase	Brassica/Grass	Drought	Podzol	Ascomycota	Sordariomycetes	Unknown	9.34711	-1.60947
Pentose phosphate pathway	6-phosphogluconolactonase	Fallow	Drought	Podzol	Ascomycota	Eurotiomycetes	Pathotroph	6.88066	-4.56636
Pentose phosphate pathway	6-phosphogluconolactonase	Fallow	Drought	Podzol	Ascomycota	Sordariomycetes	Unknown	6.88066	-4.56636
Pentose phosphate pathway	6-phosphogluconolactonase	Legume/Grass	Drought	Podzol	Ascomycota	Eurotiomycetes	Pathotroph	11.6456	4.50369
Pentose phosphate pathway	6-phosphogluconolactonase	Legume/Grass	Drought	Podzol	Ascomycota	Sordariomycetes	Unknown	11.6456	2.25809
Supplementary Table S7b
Summary of the abundance of the different biochemical pathways/cycles featuring the identified fungal proteins from fungal phyla across the soil sampling depths in terms of the label-free quantification (LFQ) intensities of the measured proteins
Cycle	Phylum	Depth	LFQ_intensity
Acetyl-CoA / Fatty acid synthesis	Ascomycota	Subsoil	93788.4
Glycolysis / Gluconeogenesis / TCA cycle	Ascomycota	Subsoil	1605.93
Methionine cycle / Transsulfuration pathway	Ascomycota	Subsoil	30651.3
Osmoprotectants	Ascomycota	Subsoil	1290.91
Oxidative stress responders	Ascomycota	Subsoil	8344.73
Pentose phosphate pathway	Ascomycota	Subsoil	71576.1
Methionine cycle / Transsulfuration pathway	Basidiomycota	Subsoil	5537.12
Nitrogen cycle	Basidiomycota	Subsoil	22501.6
Osmoprotectants	Basidiomycota	Subsoil	4584.46
Oxidative stress responders	Basidiomycota	Subsoil	905.709
Glycolysis / Gluconeogenesis / TCA cycle	Blastocladiomycota	Subsoil	4338.01
Glycolysis / Gluconeogenesis / TCA cycle	Chytridiomycota	Subsoil	5156.11
Methionine cycle / Transsulfuration pathway	Chytridiomycota	Subsoil	3564.18
Nitrogen cycle	Chytridiomycota	Subsoil	842.961
Osmoprotectants	Chytridiomycota	Subsoil	17005.8
Acetyl-CoA / Fatty acid synthesis	Mucoromycota	Subsoil	37191.8
Glycolysis / Gluconeogenesis / TCA cycle	Mucoromycota	Subsoil	3652.45
Methionine cycle / Transsulfuration pathway	Mucoromycota	Subsoil	3304.33
Nitrogen cycle	Mucoromycota	Subsoil	3355.59
Osmoprotectants	Mucoromycota	Subsoil	12099.2
Oxidative stress responders	Mucoromycota	Subsoil	589.969
Glycolysis / Gluconeogenesis / TCA cycle	Zoopagomycota	Subsoil	5156.11
Methionine cycle / Transsulfuration pathway	Zoopagomycota	Subsoil	5757.66
Osmoprotectants	Zoopagomycota	Subsoil	1468.26
Acetyl-CoA / Fatty acid synthesis	Ascomycota	Topsoil	114805
Glycolysis / Gluconeogenesis / TCA cycle	Ascomycota	Topsoil	3646.03
Methionine cycle / Transsulfuration pathway	Ascomycota	Topsoil	125403
Osmoprotectants	Ascomycota	Topsoil	5698.97
Oxidative stress responders	Ascomycota	Topsoil	38443.5
Pentose phosphate pathway	Ascomycota	Topsoil	6181.79
Methionine cycle / Transsulfuration pathway	Basidiomycota	Topsoil	32844.4
Nitrogen cycle	Basidiomycota	Topsoil	56363.2
Osmoprotectants	Basidiomycota	Topsoil	4607.13
Oxidative stress responders	Basidiomycota	Topsoil	7909.64
Glycolysis / Gluconeogenesis / TCA cycle	Blastocladiomycota	Topsoil	9472.04
Glycolysis / Gluconeogenesis / TCA cycle	Chytridiomycota	Topsoil	12430.8
Methionine cycle / Transsulfuration pathway	Chytridiomycota	Topsoil	17165.2
Nitrogen cycle	Chytridiomycota	Topsoil	20353.6
Osmoprotectants	Chytridiomycota	Topsoil	13606.2
Acetyl-CoA / Fatty acid synthesis	Mucoromycota	Topsoil	29207.9
Glycolysis / Gluconeogenesis / TCA cycle	Mucoromycota	Topsoil	5795.68
Methionine cycle / Transsulfuration pathway	Mucoromycota	Topsoil	27040
Nitrogen cycle	Mucoromycota	Topsoil	12796.3
Osmoprotectants	Mucoromycota	Topsoil	9571.35
Oxidative stress responders	Mucoromycota	Topsoil	7136.54
Glycolysis / Gluconeogenesis / TCA cycle	Zoopagomycota	Topsoil	12430.8
Methionine cycle / Transsulfuration pathway	Zoopagomycota	Topsoil	34241.9
Osmoprotectants	Zoopagomycota	Topsoil	829.161
