# Supplementary material
Source: Research Square preprint supplement (doi:10.21203/rs.3.rs-9052155/v1)
Supplement: Supplementary file 15 [file f8ccd700d649520f28a66ed9.xlsx]

## Sheet: S11a-c
Supplementary Table S11a
Signal peptide (SP) predictions for the peptides linked to CAZymes in the soil type Luvisol
SEQENCE ID	TM	SP	PREDICTION
tr|A0A177CET0|A0A177CET0_9PLEO	0	Y	n10-17c22/23o
tr|W1NF71|W1NF71_AMBTC	0	0	i
tr|A0ABT5IBE6|A0ABT5IBE6_9CAUL	0	Y	n12-23c29/30o
tr|A0AAD6VJW4|A0AAD6VJW4_9AGAR	1	0	i113-137o
tr|A0A2N5VNA4|A0A2N5VNA4_9BASI	0	Y	n7-18c27/28o
sp|Q06886|GUX1_PENJA	0	Y	n12-20c25/26o
tr|B8M1T5|B8M1T5_TALSN	0	0	i
tr|A0AA40EXA7|A0AA40EXA7_9PEZI	0	Y	n3-14c23/24o
tr|A0A9P9CY06|A0A9P9CY06_9HYPO	1	0	i23-44o
tr|Q2H5J0|Q2H5J0_CHAGB	0	Y	n4-15c20/21o
tr|A0A4V4LGB2|A0A4V4LGB2_AURPU	0	Y	n19-29c33/34o
tr|A0A4V1C6L7|A0A4V1C6L7_PYROR	1	0	i359-390o
tr|A0AA38RQH3|A0AA38RQH3_9PEZI	0	Y	n3-15c23/24o
tr|A0ABR3BGW9|A0ABR3BGW9_PHYBL	0	Y	n4-16c21/22o
tr|A0A1E1JQS8|A0A1E1JQS8_9HELO	0	Y	n4-14c19/20o
tr|A0A8H3VL27|A0A8H3VL27_VENIN	0	0	i
tr|A0A1Y1XC31|A0A1Y1XC31_9FUNG	0	0	i
tr|A0A8H5HGR4|A0A8H5HGR4_9AGAR	0	Y	n19-29c37/38o
tr|A0AAD6ZQY5|A0AAD6ZQY5_9AGAR	0	Y	n4-15c20/21o
tr|A0AAE0WIC3|A0AAE0WIC3_9PEZI	0	Y	n4-12c17/18o
tr|A0A3A2ZNT5|A0A3A2ZNT5_9EURO	0	Y	n2-9c14/15o
tr|A0A8H7DYZ4|A0A8H7DYZ4_PLEOS	0	0	i
tr|A0A0G2FDQ5|A0A0G2FDQ5_9PEZI	0	Y	n5-13c18/19o
tr|A0A9P5X7H1|A0A9P5X7H1_9AGAR	0	Y	n7-14c19/20o
tr|A0A8H8RR68|A0A8H8RR68_9HELO	0	Y	n2-13c18/19o
tr|A0A165HWQ4|A0A165HWQ4_9APHY	1	0	i46-64o
tr|A0A1Y2EAF5|A0A1Y2EAF5_9PEZI	0	Y	n6-14c19/20o
tr|A0AAE8MXK8|A0AAE8MXK8_9PEZI	0	Y	n7-15c20/21o
tr|A0A6A5W398|A0A6A5W398_9PLEO	0	Y	n3-11c16/17o
tr|A0A167GSC7|A0A167GSC7_CALVF	0	0	i
tr|A0ABX8JXB5|A0ABX8JXB5_9ENTR	8	Y	n8-17c22/23o272-297i318-336o356-378i399-427o433-458i470-491o497-514i521-539o
tr|A0AAN7H9B3|A0AAN7H9B3_9PEZI	1	0	o20-44i
tr|A0A163AFY9|A0A163AFY9_DIDRA	1	0	i330-351o
tr|A0AAE8SRV9|A0AAE8SRV9_9PEZI	0	0	i
tr|A0A2T3YZJ7|A0A2T3YZJ7_TRIA4	0	Y	n5-16c25/26o
tr|A0A511KKZ9|A0A511KKZ9_RHOTO	0	0	i
tr|A0A0C2J171|A0A0C2J171_9PEZI	0	Y	n4-15c20/21o
tr|A0A7C8RHG6|A0A7C8RHG6_ORBOL	0	Y	n7-18c23/24o
tr|A0A9P4T3W7|A0A9P4T3W7_CURKU	0	Y	n3-10c14/15o
tr|A0AA37PGB5|A0AA37PGB5_9PEZI	0	0	i
tr|A0A4Y7TG16|A0A4Y7TG16_COPMI	0	Y	n7-18c23/24o
tr|A0ABW7TH52|A0ABW7TH52_9NOCA	0	0	i
tr|A0A8H5FQE7|A0A8H5FQE7_9AGAR	0	Y	n4-14c19/20o
tr|A0AAN6Z664|A0AAN6Z664_9PEZI	0	0	i
tr|A0A318Z880|A0A318Z880_9EURO	0	Y	n3-10c15/16o
tr|A0A1A6A1S4|A0A1A6A1S4_9TREE	0	0	i
tr|A0A9W9LET3|A0A9W9LET3_9EURO	0	0	i
tr|A0A1L9Q352|A0A1L9Q352_ASPVE	0	Y	n5-14c19/20o
tr|A0A409YYJ6|A0A409YYJ6_9AGAR	1	0	i159-182o
tr|A0A9W8INZ7|A0A9W8INZ7_9FUNG	0	0	i
tr|A0A9P9E5Z8|A0A9P9E5Z8_9HYPO	0	Y	n2-12c19/20o
tr|A0A9W8TQK7|A0A9W8TQK7_9PEZI	0	Y	n4-15c20/21o
tr|A0AAN6TXY2|A0AAN6TXY2_9PEZI	0	Y	n5-15c20/21o
tr|A0A7C8QFB9|A0A7C8QFB9_ORBOL	1	0	i103-123o
tr|A0AAE0PLT8|A0AAE0PLT8_SORBR	1	0	i384-405o
tr|A0A2B7XLN9|A0A2B7XLN9_9EURO	0	0	i
tr|A0ABQ7VHK7|A0ABQ7VHK7_SOLTU	0	0	i
tr|A0A3S5CX06|A0A3S5CX06_9PEZI	0	Y	n4-15c23/24o
tr|A0A5C3KSN4|A0A5C3KSN4_COPMA	0	0	i
tr|A0A0H2U7A7|A0A0H2U7A7_MAGP6	0	Y	n4-13c18/19o
tr|A0A401GL95|A0A401GL95_9APHY	0	0	i
tr|A0ABR2XAR1|A0ABR2XAR1_9PEZI	0	Y	n5-16c24/25o
tr|A0A8H6S978|A0A8H6S978_9AGAR	12	Y	n4-11c16/17o487-504i592-611o617-642i663-682o694-717i724-745o794-814i826-849o869-888i909-930o942-962i982-1000o
tr|A0A510NWI9|A0A510NWI9_TALPI	0	Y	n2-13c18/19o
tr|A0A117NRE7|A0A117NRE7_PENFR	0	Y	n2-12c17/18o
tr|A0AAW0DZS7|A0AAW0DZS7_9AGAR	1	0	i45-65o
tr|A0A9W8CK42|A0A9W8CK42_9FUNG	0	Y	n3-14c26/27o
tr|A0A2S4KN02|A0A2S4KN02_9HYPO	0	Y	n10-23c28/29o
tr|S9Q1H8|S9Q1H8_SCHOY	0	Y	n6-17c22/23o
tr|A0AB38M797|A0AB38M797_AURPU	0	Y	n7-15c20/21o
tr|A0A2K0WRY6|A0A2K0WRY6_GIBNY	0	0	i
tr|A0A6A5WBB0|A0A6A5WBB0_9PLEO	0	Y	n5-15c20/21o
tr|A0AAN6VQI6|A0AAN6VQI6_9PEZI	0	Y	n3-13c21/22o
tr|A0AAN6TLK0|A0AAN6TLK0_9PEZI	0	0	i
tr|G4TM72|G4TM72_SERID	0	0	i
tr|A0A437AAZ7|A0A437AAZ7_9PEZI	0	0	i
tr|A0A1D2J5A4|A0A1D2J5A4_PARBR	0	Y	n4-15c20/21o
tr|E7A084|E7A084_SPORE	0	Y	n10-21c29/30o
tr|T0JYP9|T0JYP9_COLGC	0	Y	n3-14c19/20o
tr|A0A8H3B8F7|A0A8H3B8F7_9AGAM	0	Y	n3-14c19/20o
tr|A0A010R3F3|A0A010R3F3_9PEZI	0	Y	n4-14c19/20o
tr|A0A1G4MCR0|A0A1G4MCR0_LACFM	0	0	i
tr|A0A4V4HIX8|A0A4V4HIX8_DENBC	1	0	i17-40o
tr|A0A165H0C1|A0A165H0C1_EXIGL	0	0	i
tr|A0A8H5LNE0|A0A8H5LNE0_9AGAR	0	Y	n7-17c24/25o
tr|A0A9P9JW97|A0A9P9JW97_FUSRE	0	0	i
tr|A0A177C229|A0A177C229_9PLEO	0	0	i
tr|A0AAE8M2T1|A0AAE8M2T1_9HYPO	0	Y	n3-14c21/22o
tr|A0A4Y9Z393|A0A4Y9Z393_9AGAM	6	0	i207-228o248-269i330-350o356-375i464-483o1963-1987i
tr|A0A428PIW0|A0A428PIW0_9HYPO	0	Y	n6-16c21/22o
tr|A0A3N4IB99|A0A3N4IB99_ASCIM	0	0	i
tr|A0A9P9HDG4|A0A9P9HDG4_FUSSL	0	0	i
tr|A0A8H8RSZ1|A0A8H8RSZ1_9HELO	0	0	i
tr|A3LX35|A3LX35_PICST	0	Y	n4-14c22/23o
tr|A0A9P4GVT6|A0A9P4GVT6_9PLEO	0	Y	n5-12c17/18o
tr|A0A0C9UJS5|A0A0C9UJS5_SPHS4	0	0	i
tr|A0A1J8QKX5|A0A1J8QKX5_9AGAM	0	Y	n5-16c23/24o
tr|A0A6S6W355|A0A6S6W355_9PLEO	0	Y	n3-12c17/18o
tr|A0AAD7NTA5|A0AAD7NTA5_9AGAR	0	Y	n4-12c19/20o
tr|A0A8H5YI80|A0A8H5YI80_9HYPO	0	0	i
tr|A0A427YT72|A0A427YT72_9TREE	0	0	i
tr|A0A9P6KK70|A0A9P6KK70_9PLEO	0	0	i
tr|A0A9P5NUL7|A0A9P5NUL7_GYMJU	1	0	o42-59i
tr|A0A197JP47|A0A197JP47_9FUNG	0	0	i
tr|A0AAD7BNY3|A0AAD7BNY3_9AGAR	0	Y	n6-14c19/20o
tr|A0A084AT17|A0A084AT17_STACB	0	0	i
tr|A0AAE8MWI0|A0AAE8MWI0_9PEZI	0	0	i
tr|A0A0M8MWQ6|A0A0M8MWQ6_ESCWE	0	Y	n7-18c24/25o
tr|G3BEN2|G3BEN2_CANTC	0	0	i
tr|A0A067M512|A0A067M512_BOTB1	0	0	i
tr|A0A0C3QKJ0|A0A0C3QKJ0_9AGAM	1	0	i154-176o
tr|A0AAD5V1L6|A0AAD5V1L6_9APHY	0	0	i
tr|A0A409W2T0|A0A409W2T0_9AGAR	0	Y	n4-14c19/20o
tr|A0A8H5D4B3|A0A8H5D4B3_9AGAR	0	Y	n2-12c17/18o
tr|A0A157ZSX4|A0A157ZSX4_9BURK	0	Y	n4-11c29/30o
tr|A0A5K1K3H0|A0A5K1K3H0_9APHY	10	0	i21-39o66-85i92-115o135-159i171-194o226-248i288-310o322-342i354-375o395-415i
tr|A0A8E5HRP1|A0A8E5HRP1_USTVR	0	Y	n10-21c39/40o
tr|A0A1Z5T548|A0A1Z5T548_HORWE	1	0	i84-108o
tr|A0A9W8HBT3|A0A9W8HBT3_9FUNG	0	Y	n3-13c18/19o
tr|A0AAD4FF88|A0AAD4FF88_9PLEO	0	0	i
tr|A0A0G2HRS0|A0A0G2HRS0_9PEZI	0	Y	n7-14c19/20o
tr|A0A3M6ZZP5|A0A3M6ZZP5_HORWE	1	0	i72-91o
tr|A0A136J7Z7|A0A136J7Z7_9PEZI	0	0	i
tr|D5GMU8|D5GMU8_TUBMM	0	0	i
tr|A0A9W8RWJ6|A0A9W8RWJ6_9HYPO	0	0	i
tr|A0AAD4PX76|A0AAD4PX76_9EURO	0	Y	n3-10c14/15o
tr|A0A8H5B5J4|A0A8H5B5J4_9AGAR	1	0	i89-110o
tr|A0AA40F5N0|A0AA40F5N0_9PEZI	0	Y	n3-11c17/18o
tr|A0A553HX48|A0A553HX48_9PEZI	0	0	i
tr|A0ABN7J1F0|A0ABN7J1F0_9BASI	0	Y	n8-18c22/23o
tr|A0AAI8YZZ8|A0AAI8YZZ8_9PEZI	0	0	i
tr|A0A2S4UI24|A0A2S4UI24_9BASI	0	Y	n4-15c20/21o
tr|A0A8H2XAK2|A0A8H2XAK2_9AGAM	0	Y	n3-14c19/20o
tr|A0A8J2NGE2|A0A8J2NGE2_FUSEQ	5	0	i12-31o51-71i78-96o194-214i270-288o
tr|A0A409YK35|A0A409YK35_9AGAR	0	Y	n4-14c19/20o
tr|J4H3C3|J4H3C3_9APHY	0	0	i
tr|A0A8H7TGT0|A0A8H7TGT0_9HELO	0	Y	n8-19c25/26o
tr|A0A7M7NJE6|A0A7M7NJE6_STRPU	0	0	i
tr|A0AA37LJF5|A0AA37LJF5_9PEZI	0	0	i
tr|A0A3A2ZUH9|A0A3A2ZUH9_9EURO	0	0	i
tr|A0A6A6P4Y1|A0A6A6P4Y1_9PEZI	0	Y	n3-14c18/19o
tr|A0AAN6U8Y1|A0AAN6U8Y1_9PEZI	0	Y	n3-11c16/17o
tr|A0AAN6V2T2|A0AAN6V2T2_9PEZI	0	Y	n3-14c21/22o
tr|A0A317SF82|A0A317SF82_9PEZI	0	Y	n2-13c25/26o
sp|B0Y9F8|XGHA_ASPFC	0	Y	n7-18c25/26o
tr|A0A4R0RLK7|A0A4R0RLK7_9APHY	1	0	i51-68o
tr|A0A5N6VG30|A0A5N6VG30_9EURO	0	Y	n7-18c23/24o
tr|A0AAD5XTX5|A0AAD5XTX5_9FUNG	0	Y	n10-21c29/30o
tr|A0A8K0TDE5|A0A8K0TDE5_9PEZI	0	Y	n6-16c21/22o
tr|A0A1V6Z5I0|A0A1V6Z5I0_PENNA	0	Y	n3-14c20/21o
tr|V5GN46|V5GN46_KALBG	1	0	i142-166o
tr|A0A9P9FVP4|A0A9P9FVP4_9HYPO	0	0	i
tr|A0AAE8M5C4|A0AAE8M5C4_9HYPO	0	Y	n3-13c18/19o
tr|A0AAN6RU83|A0AAN6RU83_9PEZI	0	0	i
tr|A0A067TEQ5|A0A067TEQ5_GALM3	0	Y	n6-17c22/23o
tr|A0A9P5Z9K2|A0A9P5Z9K2_9AGAR	0	Y	n4-16c21/22o
tr|A0A168CKY0|A0A168CKY0_CORFA	0	0	i
tr|A0A397H9V3|A0A397H9V3_ASPTH	0	Y	n7-18c23/24o
tr|A0A9P6KS92|A0A9P6KS92_9PLEO	0	Y	n4-15c20/21o
tr|A0AAD7AIV7|A0AAD7AIV7_9AGAR	0	Y	n3-13c18/19o
tr|A0ABV3J717|A0ABV3J717_9ACTN	0	0	i
tr|A0A4Y7QL80|A0A4Y7QL80_9AGAM	0	Y	n4-12c24/25o
tr|A0A9W9F226|A0A9W9F226_9EURO	0	Y	n3-11c16/17o
tr|A0AAE0WRP8|A0AAE0WRP8_9PEZI	0	Y	n4-15c20/21o
tr|A0A7D8Z1J4|A0A7D8Z1J4_VANHU	1	0	o651-670i
tr|A0AAE8SGN3|A0AAE8SGN3_9HYPO	0	0	i
tr|A0AAD5BBH8|A0AAD5BBH8_9ASCO	0	0	i
tr|A0A7C8GRX4|A0A7C8GRX4_9BACI	0	0	i
tr|A0AAD4Q7T4|A0AAD4Q7T4_9AGAM	0	Y	n4-12c19/20o
tr|A0A6G1HSF9|A0A6G1HSF9_9PEZI	1	0	i319-340o
tr|N4XA67|N4XA67_COCH4	1	0	i343-364o
tr|A0A3D8T9F6|A0A3D8T9F6_9HELO	0	Y	n7-18c22/23o
tr|A0A5K1JT96|A0A5K1JT96_9APHY	0	0	i
tr|A0ABD1CLS1|A0ABD1CLS1_CULPP	0	0	i
tr|A0A8H7KGI5|A0A8H7KGI5_AGABI	1	0	i89-111o
tr|A0A8H6IC99|A0A8H6IC99_9AGAR	0	Y	n6-17c26/27o
tr|A0A6A6EHG5|A0A6A6EHG5_9PEZI	0	0	i
tr|A0A9P9AEJ1|A0A9P9AEJ1_9PEZI	0	0	i
tr|A0A084Q7M2|A0A084Q7M2_STAC4	0	Y	n7-20c24/25o
tr|A0A8H4PWG6|A0A8H4PWG6_9HYPO	0	Y	n3-13c18/19o
tr|R1H2P6|R1H2P6_BOTPV	0	0	i
tr|A0AAW0B967|A0AAW0B967_9AGAR	0	Y	n5-15c19/20o
tr|A0A9X1X733|A0A9X1X733_9SPHI	0	0	i
tr|A0A6A6Q494|A0A6A6Q494_9PEZI	0	Y	n3-14c19/20o
tr|A0A1J8Q420|A0A1J8Q420_9AGAM	0	Y	n3-13c18/19o
tr|A0A9P3Q0M6|A0A9P3Q0M6_LYOSH	0	0	i
tr|A0AA38LWU0|A0AA38LWU0_9TREE	0	0	i
tr|S3CYF7|S3CYF7_GLAL2	0	Y	n10-17c22/23o
tr|A0A2C5XAT1|A0A2C5XAT1_9PEZI	0	Y	n8-19c24/25o
tr|V9XTV4|V9XTV4_FLAVE	0	Y	n2-12c17/18o
tr|A0A8H3CSZ8|A0A8H3CSZ8_9AGAM	0	0	i
tr|A0A8H4XB08|A0A8H4XB08_9HYPO	0	0	i
tr|A0A9P6SQ08|A0A9P6SQ08_9HELO	11	0	o987-1006i1015-1035o1041-1065i1072-1096o1120-1139i1229-1250o1278-1297i1304-1324o1330-1351i1363-1386o1392-1411i
tr|A0AAN6XX62|A0AAN6XX62_9PEZI	0	Y	n5-12c17/18o
tr|A0A4R0RRJ4|A0A4R0RRJ4_9APHY	0	0	i
tr|A0A8H4KC55|A0A8H4KC55_9HYPO	0	Y	n2-15c20/21o
tr|A0ABN8WIX8|A0ABN8WIX8_SACUV	0	0	i
tr|A0A6A7C5V9|A0A6A7C5V9_9PEZI	0	0	i
tr|A0A8H4XEU9|A0A8H4XEU9_9HYPO	0	0	i
tr|A0A9W8ZB45|A0A9W8ZB45_9PLEO	0	Y	n4-11c16/17o
tr|A0A8H6KAW0|A0A8H6KAW0_9PEZI	0	Y	n8-15c20/21o
tr|A0A3S0HQJ7|A0A3S0HQJ7_9GAMM	0	0	i
tr|A0A1L7WS47|A0A1L7WS47_9HELO	0	Y	n5-16c21/22o
tr|A0A177U0Q7|A0A177U0Q7_9BASI	0	Y	n7-18c22/23o
tr|Q00902|Q00902_GAEGR	0	0	i
tr|A0A8S3ZT75|A0A8S3ZT75_9EUPU	4	Y	n6-15c20/21o232-255i264-283o295-318i438-460o
tr|K5WND1|K5WND1_PHACS	0	Y	n12-23c41/42o
tr|A0A9P7YE43|A0A9P7YE43_9HELO	1	0	i135-158o
tr|A0AAV9ZDX9|A0AAV9ZDX9_9AGAR	1	0	i108-130o
tr|A0A093UWK1|A0A093UWK1_TALMA	0	Y	n6-14c18/19o
tr|A0A9P6U5D5|A0A9P6U5D5_9FUNG	0	0	i
tr|A0AAW0A4W6|A0AAW0A4W6_9AGAR	0	0	i
tr|A0AAD6C635|A0AAD6C635_9EURO	0	0	i
tr|A0ABQ7I7R6|A0ABQ7I7R6_9HELO	0	Y	n3-13c18/19o
tr|A0A2H4SHJ9|A0A2H4SHJ9_CORMI	0	Y	n3-12c17/18o
tr|A0AAD6SWB7|A0AAD6SWB7_9AGAR	0	Y	n3-14c26/27o
tr|A0A4Q4TDJ6|A0A4Q4TDJ6_9PEZI	0	0	i
tr|K5WFY2|K5WFY2_PHACS	0	0	i
tr|A0A9P8V421|A0A9P8V421_9PEZI	0	0	i
tr|A0A9N9KS07|A0A9N9KS07_9HELO	0	Y	n3-14c18/19o
tr|A0A9P5XE05|A0A9P5XE05_9AGAR	0	Y	n3-11c16/17o
tr|A0A9W9KSY3|A0A9W9KSY3_9EURO	0	0	i
tr|A0A0U5G8B8|A0A0U5G8B8_ASPCI	0	0	i
tr|W9HYY6|W9HYY6_FUSOX	0	0	i
tr|A8PFG1|A8PFG1_COPC7	0	0	i
tr|A0A167LNI3|A0A167LNI3_CORFA	0	Y	n6-17c22/23o
tr|A0A8H8S8X7|A0A8H8S8X7_9HELO	0	0	i
tr|A0A6A5UR67|A0A6A5UR67_9PLEO	0	0	i
tr|A0A8H8S7F2|A0A8H8S7F2_9HELO	0	0	i
tr|A0A0D0BFJ4|A0A0D0BFJ4_9AGAR	0	Y	n4-14c18/19o
tr|A0AAW0CC28|A0AAW0CC28_9AGAR	1	0	i140-164o
tr|A0A1V8T1A5|A0A1V8T1A5_9PEZI	0	Y	n4-11c16/17o
tr|A0AAN6FLZ3|A0AAN6FLZ3_9PEZI	0	Y	n7-18c26/27o
tr|A0A4R8RF81|A0A4R8RF81_COLTR	0	0	i
tr|A0AA38JDY7|A0AA38JDY7_9AGAR	0	0	i
tr|A0A9P3LBP8|A0A9P3LBP8_9APHY	0	Y	n3-14c19/20o
tr|A0A6P8BBJ5|A0A6P8BBJ5_PYRGI	0	Y	n3-13c17/18o
sp|Q5ARN5|PGLX2_EMENI	0	Y	n6-17c24/25o
tr|A0A9N9QBS9|A0A9N9QBS9_9HELO	0	Y	n6-14c19/20o
tr|A0AAI8Z3Y6|A0AAI8Z3Y6_9PEZI	0	Y	n7-17c22/23o
tr|A0A8H7DC86|A0A8H7DC86_9AGAR	0	Y	n2-15c20/21o
tr|A0A5B0P584|A0A5B0P584_PUCGR	0	Y	n5-16c23/24o
tr|A0ABR1WL85|A0ABR1WL85_9PEZI	0	0	i
tr|A0A9P7YNT8|A0A9P7YNT8_9HELO	0	Y	n3-13c18/19o
tr|A0AA39GEP8|A0AA39GEP8_SARSR	1	0	i48-67o
tr|A0A2G9C5I7|A0A2G9C5I7_9BURK	0	0	i
tr|A0A9W9IZ70|A0A9W9IZ70_9EURO	0	Y	n3-12c17/18o
tr|A5DVW5|A5DVW5_LODEL	0	Y	n3-13c18/19o
tr|A0A2S7YFL0|A0A2S7YFL0_BEABA	0	Y	n3-13c18/19o
tr|K2RE11|K2RE11_MACPH	0	Y	n3-14c19/20o
tr|A0A6A5KJN2|A0A6A5KJN2_9PLEO	0	Y	n7-14c19/20o
tr|A0A1Y1ZGN3|A0A1Y1ZGN3_9PLEO	0	Y	n4-14c19/20o
tr|A0A9N9LPT1|A0A9N9LPT1_9HELO	0	Y	n2-12c17/18o
tr|G4T8T0|G4T8T0_SERID	0	0	i
tr|A0A066Z2R0|A0A066Z2R0_9ACTN	0	0	i
tr|A0A1L9Q2A9|A0A1L9Q2A9_ASPVE	0	Y	n4-15c20/21o
tr|A0A0C2IIK0|A0A0C2IIK0_9PEZI	0	Y	n4-16c21/22o
tr|A0AAE0JX31|A0AAE0JX31_9PEZI	0	Y	n3-14c19/20o
tr|A0A7C8I8E4|A0A7C8I8E4_9PLEO	0	Y	n4-14c19/20o
tr|A0AAE8N239|A0AAE8N239_9PEZI	1	0	i227-248o
tr|A0A5B0W473|A0A5B0W473_RHITR	0	0	i
tr|A0A8H3U7F9|A0A8H3U7F9_VENIN	0	Y	n3-14c20/21o
tr|A0A5N6Z7W2|A0A5N6Z7W2_9EURO	0	Y	n10-22c27/28o
tr|A0A9W9N9V3|A0A9W9N9V3_9EURO	0	Y	n6-13c18/19o
tr|G8LW75|G8LW75_ACECE	0	0	i
tr|A0A5C2T0F5|A0A5C2T0F5_9APHY	0	Y	n3-14c18/19o
tr|A0A8J4WNW4|A0A8J4WNW4_9TREM	0	0	i
tr|A0A1T4W4I5|A0A1T4W4I5_9BACT	0	0	i
tr|A0A9W8S5W0|A0A9W8S5W0_9HYPO	0	0	i
tr|A0A0C2W5W6|A0A0C2W5W6_SERVB	0	Y	n4-14c19/20o
tr|A0AAN7AXF6|A0AAN7AXF6_9PEZI	0	Y	n7-15c20/21o
tr|A0A1C7N9Q6|A0A1C7N9Q6_9FUNG	0	Y	n11-19c24/25o
tr|A0A6A7AS46|A0A6A7AS46_9PLEO	0	Y	n7-18c23/24o
tr|J3PC45|J3PC45_GAET3	0	0	i
tr|A0A0A2K6T3|A0A0A2K6T3_PENEN	0	Y	n3-13c18/19o
tr|A0A146F166|A0A146F166_ASPKA	0	0	i
tr|A0A4Y7T414|A0A4Y7T414_COPMI	0	0	i
tr|W9JE74|W9JE74_FUSOX	0	Y	n10-17c29/30o
tr|A0A8H7C368|A0A8H7C368_AGABI	0	0	i
tr|A0A9N9NPT4|A0A9N9NPT4_9GLOM	0	Y	n8-19c24/25o
tr|A0A0D2B8L7|A0A0D2B8L7_9EURO	0	0	i
tr|I6LTQ2|I6LTQ2_9FUNG	0	Y	n4-15c23/24o
tr|A0AAF0DZ31|A0AAF0DZ31_9BASI	0	0	i
tr|A0A9Q8SG06|A0A9Q8SG06_9PEZI	0	Y	n5-15c20/21o
tr|A0A316VUQ4|A0A316VUQ4_9BASI	0	Y	n4-16c21/22o
tr|A0A2J6R287|A0A2J6R287_HYAVF	0	0	i
tr|A0A3M7FH86|A0A3M7FH86_HORWE	0	Y	n4-14c19/20o
tr|A0A3A2ZPC3|A0A3A2ZPC3_9EURO	1	Y	n10-19c24/25o667-686i
tr|A0A507AJS6|A0A507AJS6_9PEZI	0	Y	n7-18c25/26o
tr|Q9UVZ1|Q9UVZ1_9PEZI	0	0	i
tr|A0AAN6FHB0|A0AAN6FHB0_9PEZI	0	0	i
tr|A0A075B5H6|A0A075B5H6_TRIHA	0	Y	n6-17c22/23o
tr|A0A9P5JZJ1|A0A9P5JZJ1_9AGAM	0	Y	n5-16c21/22o
tr|A0AAD7IZN6|A0AAD7IZN6_9AGAR	0	0	i
tr|A0A8K0TQQ3|A0A8K0TQQ3_9PEZI	0	Y	n4-11c16/17o
tr|A0A420Y6Z5|A0A420Y6Z5_9PEZI	1	0	i21-46o
tr|A0A5C3KKJ5|A0A5C3KKJ5_COPMA	0	Y	n4-14c19/20o
tr|A0AA39XQC9|A0AA39XQC9_9PEZI	0	0	i
tr|A0A1Y2C280|A0A1Y2C280_9FUNG	0	Y	n4-15c20/21o
tr|A0A167YFZ4|A0A167YFZ4_CORFA	0	0	i
tr|A0A8H5BCQ5|A0A8H5BCQ5_9AGAR	0	Y	n3-13c18/19o
tr|A0A0F4ZAZ5|A0A0F4ZAZ5_9PEZI	0	0	i
tr|A0A8H7CNY2|A0A8H7CNY2_9AGAR	0	Y	n3-13c18/19o
tr|A0A1Q5Q8Y8|A0A1Q5Q8Y8_TALAT	0	Y	n7-18c23/24o
tr|A0A5C5FSE7|A0A5C5FSE7_9BASI	0	0	i
tr|A0A8H3XBP0|A0A8H3XBP0_GIGMA	0	0	i
tr|A0A8H8P3F5|A0A8H8P3F5_9AGAM	0	0	i
tr|A0A8H7P1I5|A0A8H7P1I5_9APHY	0	Y	n4-16c20/21o
tr|A0A420XZJ0|A0A420XZJ0_9PEZI	0	Y	n4-12c17/18o
tr|S8FSG9|S8FSG9_FOMSC	0	Y	n3-14c19/20o
tr|A0A9P6X755|A0A9P6X755_RHIOR	0	Y	n6-17c26/27o
tr|A0A2I2FG38|A0A2I2FG38_ASPCN	0	Y	n4-15c20/21o
tr|S8AII8|S8AII8_DACHA	0	0	i
tr|A0A439D1R4|A0A439D1R4_9PEZI	0	0	i
tr|A0AAD9IBY6|A0AAD9IBY6_9PEZI	0	0	i
tr|A0A6G1M734|A0A6G1M734_ORBOL	0	0	i
tr|A0A9P9IAG1|A0A9P9IAG1_9PLEO	0	0	i
tr|A0A0D7AXX2|A0A0D7AXX2_9AGAR	0	0	i
tr|A0A4S4KAW3|A0A4S4KAW3_9APHY	0	0	i
tr|A0A5C3LTL4|A0A5C3LTL4_9AGAR	0	Y	n6-14c18/19o
tr|A0A9W4KLC8|A0A9W4KLC8_9EURO	0	Y	n7-16c21/22o
tr|G2XB84|G2XB84_VERDV	0	Y	n6-17c21/22o
tr|A0A6G1HJR6|A0A6G1HJR6_9PEZI	0	Y	n3-13c21/22o
tr|A0A8H3GBZ2|A0A8H3GBZ2_9AGAM	0	Y	n2-10c15/16o
tr|A0A3R7F585|A0A3R7F585_9EURO	0	Y	n3-11c16/17o
tr|A0A2X0KWT2|A0A2X0KWT2_9BASI	1	0	i111-135o
tr|A0A9W8CUE0|A0A9W8CUE0_9FUNG	0	Y	n33-46c51/52o
tr|A0AAD2HKX3|A0AAD2HKX3_9AGAR	0	Y	n7-17c21/22o
tr|A0A8H6XWX6|A0A8H6XWX6_9AGAR	0	Y	n11-22c30/31o
tr|A0A8S0WA10|A0A8S0WA10_CYCAE	0	Y	n7-18c23/24o
tr|A0A6A6TVF9|A0A6A6TVF9_9PEZI	0	Y	n2-12c16/17o
tr|A0A1Y2IJY5|A0A1Y2IJY5_TRAC3	0	Y	n7-14c19/20o
tr|A0A0L1ISA2|A0A0L1ISA2_ASPN3	0	Y	n6-16c21/22o
tr|A0A2R6NWN6|A0A2R6NWN6_9APHY	9	0	o13-31i43-66o86-107i128-151o180-204i225-245o265-284i296-317o329-351i
tr|A0A6A5R2L4|A0A6A5R2L4_AMPQU	0	Y	n6-13c17/18o
tr|F0XHN3|F0XHN3_GROCL	0	0	i
tr|A0A4Z1P9B4|A0A4Z1P9B4_9PEZI	0	Y	n3-15c19/20o
tr|A0AA39WV90|A0AA39WV90_9PEZI	0	Y	n4-15c20/21o
tr|A0A9N9ZL59|A0A9N9ZL59_9HYPO	0	0	i
tr|A0A2N5T2U5|A0A2N5T2U5_9BASI	0	Y	n7-18c27/28o
tr|A0A0H2SMM7|A0A0H2SMM7_9AGAM	0	Y	n7-15c19/20o
tr|A0A1T3CUW0|A0A1T3CUW0_9HYPO	0	Y	n7-15c20/21o
tr|M3A547|M3A547_PSEFD	0	Y	n3-14c19/20o
tr|A0A9P7SVY3|A0A9P7SVY3_9HYPO	0	Y	n3-13c21/22o
tr|A0A2K0UHH3|A0A2K0UHH3_TRIHA	0	Y	n8-19c24/25o
tr|A0A2T3ZGX8|A0A2T3ZGX8_TRIA4	1	0	i232-253o
tr|A0AAE1IK43|A0AAE1IK43_9HYPO	0	0	i
tr|A0A2N3N8K2|A0A2N3N8K2_9PEZI	0	Y	n3-14c19/20o
tr|A0A9W8XF99|A0A9W8XF99_9PLEO	0	Y	n4-11c16/17o
tr|A0A6A6I801|A0A6A6I801_9PLEO	0	Y	n2-13c18/19o
tr|A0A6G1HEF7|A0A6G1HEF7_9PEZI	1	0	i91-115o
tr|A0A7H1D2S7|A0A7H1D2S7_9AGAM	0	0	i
tr|A0A409YMI7|A0A409YMI7_9AGAR	0	Y	n3-11c16/17o
tr|A0ABQ8Q961|A0ABQ8Q961_9AGAR	0	0	i
tr|A0A8H4PYZ3|A0A8H4PYZ3_9HYPO	0	0	i
tr|A0A8H3RNL6|A0A8H3RNL6_9EURO	0	0	i
tr|R9P877|R9P877_PSEHS	3	0	i12-37o118-137i281-303o
tr|A0A9W8BN59|A0A9W8BN59_9FUNG	0	Y	n3-18c23/24o
tr|A0A9Q9AS25|A0A9Q9AS25_9PEZI	0	Y	n3-14c19/20o
tr|A0AAD7E1A9|A0AAD7E1A9_MYCRO	0	Y	n2-9c13/14o
tr|A0A8H5BDL9|A0A8H5BDL9_9AGAR	0	Y	n9-16c21/22o
tr|A0A0L6VAD6|A0A0L6VAD6_9BASI	0	Y	n9-20c25/26o
tr|A0A7H8R883|A0A7H8R883_TALRU	0	Y	n3-14c19/20o
tr|A0A8H7F0U3|A0A8H7F0U3_AGABI	0	Y	n10-21c29/30o
tr|A0AAE0LMI0|A0AAE0LMI0_9PEZI	0	Y	n3-13c18/19o
tr|A0AAE1BYM6|A0AAE1BYM6_9PEZI	0	Y	n3-13c18/19o
tr|A0AAD6Z2K1|A0AAD6Z2K1_9AGAR	0	Y	n29-39c43/44o
tr|A0A364KVR0|A0A364KVR0_TALAM	7	0	i159-183o203-224i585-603o609-629i641-662o682-701i736-759o
tr|A0A409WCR4|A0A409WCR4_9AGAR	0	Y	n7-17c22/23o
tr|A0A9Q5I310|A0A9Q5I310_SANBA	0	Y	n8-18c25/26o
tr|A0A6A6GEU3|A0A6A6GEU3_9PEZI	0	0	i
tr|Q2HF13|Q2HF13_CHAGB	0	Y	n3-13c18/19o
tr|A0AAD7GQ98|A0AAD7GQ98_MYCRO	0	Y	n7-18c23/24o
tr|A0A395RSI4|A0A395RSI4_FUSSP	0	Y	n4-14c19/20o
tr|J4GD37|J4GD37_9APHY	0	0	i
tr|A0A9P6ED40|A0A9P6ED40_9AGAR	0	Y	n3-11c16/17o
tr|A0A1E3QRR7|A0A1E3QRR7_9ASCO	0	0	i
tr|A0A7Y9ZDQ3|A0A7Y9ZDQ3_9ACTN	0	0	i
tr|A0A2S4UGX8|A0A2S4UGX8_9BASI	1	0	i93-115o
tr|A0A9W9THM5|A0A9W9THM5_PENCI	0	0	i
tr|A0A9P3H2J8|A0A9P3H2J8_9FUNG	1	0	o493-518i
tr|A0A7S8I0E7|A0A7S8I0E7_FUSCU	0	Y	n4-14c19/20o
tr|A0A8K0T302|A0A8K0T302_9HYPO	0	0	i
tr|L8G7D7|L8G7D7_PSED2	0	0	i
tr|A0A9Q3FDM9|A0A9Q3FDM9_9BASI	1	0	i7-26o
tr|A0A0C9TP76|A0A0C9TP76_SPHS4	0	0	i
tr|A0A067SXQ7|A0A067SXQ7_GALM3	0	0	i
tr|A0AAN8P3I0|A0AAN8P3I0_9PEZI	0	Y	n3-13c18/19o
tr|A0AAE0MZ92|A0AAE0MZ92_9PEZI	0	Y	n3-14c19/20o
tr|A0A9W8Y5V0|A0A9W8Y5V0_9PLEO	0	0	i
tr|A0A0F7S2P8|A0A0F7S2P8_9BASI	0	Y	n9-22c27/28o
tr|A0A9P9FYX9|A0A9P9FYX9_FUSRE	0	0	i
tr|A0A9P5GMV0|A0A9P5GMV0_PENCR	0	0	i
tr|A0A397HCU1|A0A397HCU1_ASPTH	0	Y	n9-19c24/25o
tr|A0AAX6MAX1|A0AAX6MAX1_9PEZI	0	0	i
tr|A0A4P9Y467|A0A4P9Y467_9FUNG	0	Y	n5-12c16/17o
tr|A0A8K0L1G2|A0A8K0L1G2_9PEZI	0	Y	n4-15c22/23o
tr|A0A0D7AQZ6|A0A0D7AQZ6_9AGAR	1	0	i96-118o
tr|A0A8H3G1U9|A0A8H3G1U9_9LECA	0	0	i
tr|A0AAN8P5W2|A0AAN8P5W2_9PEZI	0	Y	n4-11c16/17o
tr|I2FPN0|I2FPN0_USTHO	0	Y	n8-19c24/25o
tr|A0A8H5F677|A0A8H5F677_9AGAR	0	0	i
tr|A0AAD7QJZ1|A0AAD7QJZ1_9ASCO	1	0	o30-51i
tr|A0A1E4SNW7|A0A1E4SNW7_9ASCO	0	0	i
tr|A0A367JHU2|A0A367JHU2_RHIAZ	0	0	i
tr|A0AAD6XAG2|A0AAD6XAG2_9AGAR	0	Y	n4-15c20/21o
tr|A0ABQ8RIP9|A0ABQ8RIP9_FUSEQ	0	Y	n11-22c26/27o
tr|A0A6A5SZI0|A0A6A5SZI0_9PLEO	0	0	i
tr|A0A9P5AI28|A0A9P5AI28_9HYPO	0	0	i
tr|A0A1Y2MH92|A0A1Y2MH92_EPING	0	0	i
tr|A0A3M7A5F1|A0A3M7A5F1_HORWE	0	Y	n4-15c20/21o
tr|A0A177CIY1|A0A177CIY1_9PLEO	0	Y	n2-12c16/17o
tr|A0A9P6R270|A0A9P6R270_9FUNG	1	0	i187-207o
tr|A0A1Y2BUX2|A0A1Y2BUX2_9FUNG	0	Y	n7-18c25/26o
tr|A0A0C2T8B5|A0A0C2T8B5_AMAMK	0	0	i
tr|A0A9W8NAW4|A0A9W8NAW4_9PEZI	0	0	i
tr|A0A4S9AZI3|A0A4S9AZI3_AURPU	0	0	i
tr|A0A9P5U9F9|A0A9P5U9F9_9AGAR	0	Y	n3-13c18/19o
tr|A0A5B0QXU3|A0A5B0QXU3_PUCGR	0	0	i
tr|B8MIE9|B8MIE9_TALSN	0	Y	n3-13c31/32o
tr|A0A8K0WNQ4|A0A8K0WNQ4_9HYPO	0	0	i
tr|A0A0D2C994|A0A0D2C994_9EURO	1	0	i355-378o
tr|A0A1Y2ANW8|A0A1Y2ANW8_9FUNG	0	0	i
tr|A0A7C8MUT2|A0A7C8MUT2_9PLEO	0	Y	n3-10c15/16o
tr|A0A2S4UFD2|A0A2S4UFD2_9BASI	0	Y	n12-22c27/28o
tr|A0A3M7D5E3|A0A3M7D5E3_HORWE	0	Y	n6-13c18/19o
tr|A0A934R645|A0A934R645_9BACT	0	Y	n9-20c28/29o
tr|A0A9W9P070|A0A9W9P070_9EURO	0	0	i
tr|A0A5M6C6S5|A0A5M6C6S5_9TREE	1	0	i191-214o
tr|A0AA40C5E9|A0AA40C5E9_9PEZI	0	Y	n3-14c19/20o
tr|A0A9P4LXE9|A0A9P4LXE9_9PEZI	0	0	i
tr|A0A5N7B8L4|A0A5N7B8L4_9EURO	0	0	i
tr|A0A3G3M301|A0A3G3M301_9APHY	0	Y	n10-21c25/26o
tr|A0A135TGV9|A0A135TGV9_9PEZI	0	Y	n2-12c17/18o
tr|A0A4R8RNH4|A0A4R8RNH4_COLTR	0	Y	n6-17c21/22o
tr|A0A8S0W634|A0A8S0W634_CYCAE	0	0	i
tr|A0A2P7YLW1|A0A2P7YLW1_9ASCO	0	0	i
tr|A0A409VIL1|A0A409VIL1_9AGAR	0	0	i
tr|A0A0A1T446|A0A0A1T446_9HYPO	1	0	i371-394o
tr|I1P4P2|I1P4P2_ORYGL	0	0	i
tr|A0AAD6DU35|A0AAD6DU35_9EURO	1	0	o6-28i
tr|A0A4Y7T8E2|A0A4Y7T8E2_COPMI	0	0	i
tr|A0ABU0JPF5|A0ABU0JPF5_HATLI	0	0	i
tr|A0A1C7MH75|A0A1C7MH75_GRIFR	0	0	i
tr|U1GGK4|U1GGK4_ENDPU	0	0	i
tr|A0A9W8M182|A0A9W8M182_9FUNG	0	Y	n13-24c32/33o
tr|A0AAD5SF54|A0AAD5SF54_9FUNG	0	Y	n3-11c19/20o
tr|A0A9W4XWK5|A0A9W4XWK5_9PLEO	0	Y	n3-13c18/19o
tr|A0A9P8MK85|A0A9P8MK85_9HYPO	0	0	i
tr|G0VIR0|G0VIR0_NAUCA	0	Y	n6-16c21/22o
tr|A0A6A6JIQ8|A0A6A6JIQ8_WESOR	0	Y	n3-14c19/20o
tr|A0A9Q8PF45|A0A9Q8PF45_PASFU	0	Y	n19-27c32/33o
tr|A0A0F7SDN7|A0A0F7SDN7_9BASI	1	0	i221-247o
sp|P29127|XYNA_NEOPA	0	Y	n6-13c18/19o
tr|A0A3N4KWJ8|A0A3N4KWJ8_9PEZI	0	0	i
tr|A0A9W9QE50|A0A9W9QE50_9EURO	0	0	i
tr|A0A3L6MNT5|A0A3L6MNT5_FUSOX	0	0	i
tr|A0A2V5I0E2|A0A2V5I0E2_9EURO	0	0	i
tr|K5W6J7|K5W6J7_PHACS	0	Y	n4-15c20/21o
tr|F4S8K1|F4S8K1_MELLP	0	Y	n8-19c27/28o
tr|A0AA37L343|A0AA37L343_9PEZI	0	0	i
tr|A0A8E2JG18|A0A8E2JG18_9PEZI	0	0	i
tr|A0AAN6SRN5|A0AAN6SRN5_9PEZI	0	0	i
tr|A0A9P9EHA3|A0A9P9EHA3_9HYPO	0	Y	n3-13c18/19o
tr|A0ABR2V7Y5|A0ABR2V7Y5_9PEZI	0	0	i
tr|A0A2K0T953|A0A2K0T953_TRIHA	0	Y	n8-15c20/21o
tr|A0A1F5LTT4|A0A1F5LTT4_PENAI	0	0	i
tr|A0A0K6GCX7|A0A0K6GCX7_9AGAM	0	Y	n5-16c20/21o
tr|A0A0G4LS57|A0A0G4LS57_VERLO	0	Y	n9-19c24/25o
tr|A0AAE8MYH7|A0AAE8MYH7_9PEZI	0	Y	n6-13c18/19o
tr|A0A427XLI1|A0A427XLI1_9TREE	0	0	i
tr|A0A5D3B5J6|A0A5D3B5J6_9TREE	0	Y	n11-21c27/28o
tr|A0A9P6DFC8|A0A9P6DFC8_PLEER	0	Y	n6-16c21/22o
tr|A0A9W9WJ74|A0A9W9WJ74_9EURO	0	Y	n3-14c22/23o
tr|A0A9P6LE96|A0A9P6LE96_9PEZI	0	Y	n6-15c20/21o
tr|M3AZZ1|M3AZZ1_SPHMS	0	Y	n10-18c23/24o
tr|A0AAN7TFX6|A0AAN7TFX6_9PEZI	0	Y	n4-14c19/20o
tr|A0A2D3V580|A0A2D3V580_9PEZI	0	Y	n4-15c20/21o
tr|A0A2S4UBM2|A0A2S4UBM2_9BASI	0	0	i
tr|A0A6A6U9T1|A0A6A6U9T1_9PEZI	0	Y	n3-14c20/21o
tr|A0ABR0HFA5|A0ABR0HFA5_9PEZI	0	Y	n4-11c16/17o
tr|A0A0F8V470|A0A0F8V470_9EURO	0	0	i
tr|A0AAJ0ATG9|A0AAJ0ATG9_9PEZI	0	0	i
tr|A0A1Y2DCJ1|A0A1Y2DCJ1_9PEZI	0	0	i
tr|A0A8K0WTS1|A0A8K0WTS1_9HYPO	0	Y	n3-13c18/19o
tr|A0AAD4Q571|A0AAD4Q571_9AGAM	0	Y	n3-14c21/22o
tr|A0A0D7BHS6|A0A0D7BHS6_9AGAR	1	0	i33-56o
tr|A0A9P8V5H9|A0A9P8V5H9_9PEZI	0	0	i
tr|A0ABR0M050|A0ABR0M050_9PEZI	0	Y	n6-17c25/26o
tr|A0A1V6ULE7|A0A1V6ULE7_9EURO	0	Y	n9-19c24/25o
tr|A0A8H7QSB2|A0A8H7QSB2_9FUNG	0	Y	n14-25c30/31o
tr|A0A2T3YRF3|A0A2T3YRF3_TRIA4	0	Y	n7-15c20/21o
tr|A0A9W9NK03|A0A9W9NK03_PENCI	1	0	i195-215o
tr|A0A553I442|A0A553I442_9PEZI	0	Y	n4-15c20/21o
tr|A0AA39L9N3|A0AA39L9N3_SARSR	0	0	i
tr|A0A2N8UBV4|A0A2N8UBV4_9BASI	0	Y	n4-12c20/21o
tr|A0A1Q8RRQ9|A0A1Q8RRQ9_9PEZI	0	Y	n8-18c22/23o
tr|A0A9P7YLW4|A0A9P7YLW4_9HELO	0	0	i
tr|A0AAD5V2S7|A0AAD5V2S7_9APHY	0	0	i
tr|A0A3M7C3S5|A0A3M7C3S5_HORWE	0	0	i
tr|A0A9W8IEP0|A0A9W8IEP0_9FUNG	0	0	i
tr|A0A0A8L236|A0A0A8L236_9SACH	0	0	i
tr|A0A2D2AGW0|A0A2D2AGW0_9EURO	0	0	i
tr|A0ABT9JA73|A0ABT9JA73_9RHOB	12	0	i15-38o58-76i88-114o134-156i191-217o237-258i285-309o329-351i363-384o390-412i449-471o491-511i
tr|A0AAD4IHF9|A0AAD4IHF9_9PLEO	1	Y	n3-13c18/19o347-364i
tr|A0A8H4NR61|A0A8H4NR61_9HYPO	0	Y	n4-15c19/20o
tr|X8J6M7|X8J6M7_9AGAM	0	Y	n5-13c18/19o
tr|A0A427YQ34|A0A427YQ34_9TREE	0	0	i
tr|W7MEN7|W7MEN7_GIBM7	0	Y	n6-16c23/24o
tr|A0A9W9KJS0|A0A9W9KJS0_9EURO	0	0	i
tr|A0A1Q5ULG8|A0A1Q5ULG8_9EURO	0	0	i
tr|A0A0D7B5P1|A0A0D7B5P1_9AGAR	0	Y	n3-14c19/20o
tr|A0A319C7Y9|A0A319C7Y9_9EURO	0	Y	n4-17c22/23o
tr|A0A8H4VI54|A0A8H4VI54_9AGAR	0	Y	n6-16c21/22o
tr|I7FDJ2|I7FDJ2_ASPTE	0	0	i
tr|A0A9N8VY14|A0A9N8VY14_9GLOM	1	0	i265-284o
tr|A0A4S9TUV3|A0A4S9TUV3_AURPU	0	Y	n3-13c20/21o
tr|A0A9P5TT07|A0A9P5TT07_GYMJU	0	Y	n4-12c21/22o
tr|A0AAJ0CVY0|A0AAJ0CVY0_9HYPO	0	Y	n3-14c19/20o
tr|A0A9P8CQ68|A0A9P8CQ68_9HYPO	0	0	i
tr|A0A6A6FBW2|A0A6A6FBW2_9PEZI	1	0	i78-106o
tr|A0A8E2JYK3|A0A8E2JYK3_9PEZI	0	Y	n8-21c26/27o
tr|A0A166SA52|A0A166SA52_9PEZI	0	Y	n7-18c22/23o
tr|A0A1S8A849|A0A1S8A849_ROSNE	0	Y	n5-15c22/23o
sp|G2Q9T3|LP9H_THET4	0	Y	n6-17c21/22o
tr|A0A9N9FS90|A0A9N9FS90_9GLOM	0	0	i
tr|A0A8H4EZ64|A0A8H4EZ64_MUCCL	0	0	i
tr|A0A6A5S1U5|A0A6A5S1U5_9PLEO	0	0	i
tr|A0A3M7G2X7|A0A3M7G2X7_HORWE	0	Y	n6-16c21/22o
tr|A0A9P7VA03|A0A9P7VA03_9ASCO	0	0	i
tr|A0A4P7N4J4|A0A4P7N4J4_PYROR	0	0	i
tr|A0A1X2I2F7|A0A1X2I2F7_9FUNG	0	Y	n9-20c28/29o
tr|A0A1L7W9Z5|A0A1L7W9Z5_FUSPR	0	0	i
tr|A5DHX3|A5DHX3_PICGU	0	0	i
tr|A0A5N5QUM3|A0A5N5QUM3_9AGAM	0	0	i
tr|A0A6A5ZWP9|A0A6A5ZWP9_9PLEO	1	0	i312-333o
tr|A0AAV0BK67|A0AAV0BK67_PHAPC	0	Y	n12-22c30/31o
tr|A0AAD4PU87|A0AAD4PU87_9EURO	1	Y	n3-13c18/19o405-426i
tr|A0A9W9VFY7|A0A9W9VFY7_9EURO	0	Y	n5-15c20/21o
tr|A0A0C9VHR3|A0A0C9VHR3_SPHS4	0	0	i
tr|A0A6A5XMY5|A0A6A5XMY5_9PLEO	0	0	i
tr|A0A7C8IKD0|A0A7C8IKD0_9PEZI	1	Y	n9-19c24/25o548-568i
tr|A0A1G4KJE0|A0A1G4KJE0_9SACH	0	0	i
tr|A0A1E3QQB0|A0A1E3QQB0_9ASCO	0	0	i
tr|G1XDS8|G1XDS8_ARTOA	0	Y	n6-14c19/20o
tr|A0AAN9UTA2|A0AAN9UTA2_9PEZI	0	0	i
tr|A0A2A9NLX3|A0A2A9NLX3_9AGAR	0	Y	n3-14c19/20o
tr|A0A1L9WW22|A0A1L9WW22_ASPA1	0	0	i
tr|A0ABR4I528|A0ABR4I528_9EURO	2	Y	n13-24c31/32o913-933i954-972o
tr|A0A9W9RDM9|A0A9W9RDM9_9EURO	0	0	i
tr|A0A4Z0A9K8|A0A4Z0A9K8_9AGAM	1	0	o423-441i
tr|A0A4U7KX62|A0A4U7KX62_9BASI	1	0	i222-248o
tr|A0A9P5GZA7|A0A9P5GZA7_PENCR	0	0	i
tr|A0A9W9TE36|A0A9W9TE36_9EURO	0	Y	n3-13c18/19o
tr|A0AAE0HNX6|A0AAE0HNX6_9PEZI	0	0	i
tr|A0A8K0TF80|A0A8K0TF80_9PEZI	1	0	i67-89o
tr|A0A1L7X8S2|A0A1L7X8S2_9HELO	0	0	i
tr|A0A1G4J322|A0A1G4J322_9SACH	0	Y	n3-14c19/20o
tr|A0A8H2XZ79|A0A8H2XZ79_9AGAM	0	Y	n7-18c24/25o
tr|A0A0D0CQ80|A0A0D0CQ80_9AGAR	0	Y	n7-18c30/31o
tr|A0A0H1BSL4|A0A0H1BSL4_9EURO	0	0	i
tr|A0A9P9BPA9|A0A9P9BPA9_9PEZI	0	Y	n6-14c19/20o
tr|A0A6A6H3V7|A0A6A6H3V7_VIRVR	0	Y	n3-14c19/20o
tr|A0AAD7BEL5|A0AAD7BEL5_9AGAR	0	Y	n3-10c15/16o
tr|B0WN55|B0WN55_CULQU	0	0	i
tr|A0A6A5QL87|A0A6A5QL87_AMPQU	0	Y	n6-16c21/22o
tr|A0AAD5S980|A0AAD5S980_9FUNG	0	Y	n4-16c20/21o
tr|A0AAE8N5W9|A0AAE8N5W9_9PEZI	0	Y	n4-15c20/21o
tr|A0A7J5U1P3|A0A7J5U1P3_9BACT	0	Y	n6-14c19/20o
tr|G4TFT9|G4TFT9_SERID	0	Y	n3-14c18/19o
tr|A0A8E2ARI0|A0A8E2ARI0_9APHY	0	0	i
tr|W4KEV3|W4KEV3_HETIT	1	0	i48-70o
tr|A0A1L9RG88|A0A1L9RG88_ASPWE	0	Y	n7-15c20/21o
tr|A0AA37GI77|A0AA37GI77_9PEZI	0	Y	n3-11c16/17o
tr|A0A553HJP5|A0A553HJP5_9PEZI	0	Y	n3-14c18/19o
tr|A0A8E2F1E0|A0A8E2F1E0_9PEZI	1	0	i91-115o
tr|A0A8H4INB8|A0A8H4INB8_9PEZI	4	0	o239-263i330-350o356-375i387-406o
tr|A0AAD7HBG8|A0AAD7HBG8_9AGAR	1	0	o38-61i
tr|G8B7X9|G8B7X9_CANPC	0	Y	n4-14c18/19o
tr|A0A8H7QMA2|A0A8H7QMA2_9FUNG	0	Y	n12-23c28/29o
tr|A0AAD9HS34|A0AAD9HS34_9PEZI	0	Y	n10-21c26/27o
tr|A0A9P5XBB2|A0A9P5XBB2_9AGAR	0	0	i
tr|A0AAN6MN91|A0AAN6MN91_9PEZI	0	0	i
tr|A0A9N8KHW4|A0A9N8KHW4_9PEZI	0	Y	n4-15c20/21o
tr|A0A066VT93|A0A066VT93_TILAU	1	0	i70-91o
tr|A0A6V8QIA4|A0A6V8QIA4_TRIAP	0	0	i
tr|A0A4U6XQM8|A0A4U6XQM8_9PEZI	0	Y	n2-13c18/19o
tr|A0A1Y2LHU6|A0A1Y2LHU6_EPING	0	Y	n5-15c20/21o
tr|K1WHJ2|K1WHJ2_MARBU	0	0	i
tr|A0A5N6TIW9|A0A5N6TIW9_9EURO	0	Y	n4-16c21/22o
tr|A0A0C9XP25|A0A0C9XP25_9AGAR	0	Y	n3-14c19/20o
tr|A0A0D2NAP8|A0A0D2NAP8_HYPSF	1	Y	n11-22c26/27o708-726i
tr|A0A5J5EIU9|A0A5J5EIU9_9PEZI	0	Y	n2-12c17/18o
tr|A0A074WQW8|A0A074WQW8_9PEZI	0	0	i
tr|A0A8K0KZX3|A0A8K0KZX3_9PEZI	0	Y	n5-16c21/22o
tr|F4RZQ5|F4RZQ5_MELLP	0	0	i
tr|A0A8H7N1M4|A0A8H7N1M4_BIOOC	0	Y	n4-11c16/17o
tr|A0AAD7QW49|A0AAD7QW49_9ASCO	0	0	i
tr|A0A9P5RPS8|A0A9P5RPS8_9FUNG	0	0	i
tr|A0A9P9WK12|A0A9P9WK12_9PEZI	0	Y	n4-11c16/17o
tr|A0A6A4I222|A0A6A4I222_9AGAR	0	0	i
tr|A0A9W9M9D3|A0A9W9M9D3_9EURO	0	Y	n4-12c17/18o
tr|A0A8H5FEA0|A0A8H5FEA0_9AGAR	0	0	i
tr|E5AEE4|E5AEE4_LEPMJ	0	Y	n3-13c17/18o
tr|A0A4Z0YKH7|A0A4Z0YKH7_9PEZI	0	0	i
tr|A0A1A9MZU6|A0A1A9MZU6_9BURK	0	0	i
tr|A0A0D2CZZ3|A0A0D2CZZ3_9EURO	0	0	i
tr|A0A517LCZ5|A0A517LCZ5_9PEZI	0	Y	n4-15c19/20o
tr|A0A384JTB8|A0A384JTB8_BOTFB	0	Y	n31-42c50/51o
tr|A0A6G1L2Y4|A0A6G1L2Y4_9PEZI	0	Y	n5-11c16/17o
tr|A0AAW0DKL0|A0AAW0DKL0_9AGAR	1	0	i80-101o
tr|A0A5C3MTN0|A0A5C3MTN0_9AGAM	0	Y	n6-16c24/25o
tr|A0A9P8VM20|A0A9P8VM20_9PEZI	0	0	i
tr|A0A1J9PZR3|A0A1J9PZR3_9EURO	0	0	i
tr|A0A177BZQ8|A0A177BZQ8_9PLEO	1	0	o717-738i
tr|A0A1Y1V8B9|A0A1Y1V8B9_9FUNG	0	0	i
tr|A0A3N4J250|A0A3N4J250_9PEZI	0	Y	n4-15c21/22o
tr|A0A2P7ZTT6|A0A2P7ZTT6_9PEZI	0	Y	n4-12c16/17o
tr|A0A8H6Y4L8|A0A8H6Y4L8_9AGAR	1	0	i33-55o
tr|A0A6A5TV87|A0A6A5TV87_9PLEO	0	Y	n3-11c16/17o
tr|A0A409YBL0|A0A409YBL0_9AGAR	1	Y	n4-15c19/20o269-291i
tr|A0A261XYV9|A0A261XYV9_9FUNG	0	Y	n6-17c22/23o
tr|A0A8S0VX92|A0A8S0VX92_CYCAE	1	0	i89-112o
tr|A0A8H5FUN5|A0A8H5FUN5_9AGAR	0	Y	n5-15c20/21o
tr|A0A2N8ULL0|A0A2N8ULL0_9BASI	1	0	i217-243o
tr|A0AA39NWB7|A0AA39NWB7_9AGAR	2	0	i159-176o196-213i
tr|A0A164ZDJ0|A0A164ZDJ0_XYLHT	0	0	i
tr|A0AAI8V907|A0AAI8V907_9PEZI	0	0	i
tr|A0A9P4Y602|A0A9P4Y602_CRYP1	0	Y	n2-13c18/19o
tr|A0A164H7M6|A0A164H7M6_9CRUS	0	0	i
tr|K2RIE7|K2RIE7_MACPH	0	Y	n8-15c20/21o
tr|A0A074S8M1|A0A074S8M1_9AGAM	1	Y	n4-17c35/36o549-570i
tr|A0A0J8R361|A0A0J8R361_COCIT	0	Y	n3-13c18/19o
tr|A0A4U0XUL4|A0A4U0XUL4_9PEZI	0	Y	n4-15c27/28o
tr|A0A2A9NP17|A0A2A9NP17_9AGAR	0	Y	n3-14c18/19o
tr|A0AAW0FYE4|A0AAW0FYE4_9APHY	0	Y	n2-10c15/16o
tr|A0A9W9LDX9|A0A9W9LDX9_9EURO	0	0	i
tr|A0AAW0DL88|A0AAW0DL88_9AGAR	0	Y	n4-11c16/17o
tr|A0A4Q4TSU4|A0A4Q4TSU4_9PEZI	0	0	i
tr|A0A1V6UEN5|A0A1V6UEN5_9EURO	0	Y	n4-15c19/20o
tr|A0A4Y7ST68|A0A4Y7ST68_COPMI	0	Y	n3-14c19/20o
tr|A0A2K0T442|A0A2K0T442_9HYPO	0	Y	n2-10c15/16o
tr|A0AAD5X174|A0AAD5X174_9FUNG	0	Y	n3-13c18/19o
tr|A0A1Y1YSU2|A0A1Y1YSU2_9FUNG	1	0	i73-96o
tr|A0A9P5A9M1|A0A9P5A9M1_9HYPO	0	0	i
tr|A0A9N9ZAZ5|A0A9N9ZAZ5_9HYPO	0	Y	n3-10c15/16o
tr|A0A9P5AGD4|A0A9P5AGD4_9HYPO	0	Y	n3-13c18/19o
tr|A0AAN7DRP7|A0AAN7DRP7_9FUNG	0	Y	n3-14c19/20o
tr|A0A9W9CBW2|A0A9W9CBW2_9PLEO	0	Y	n2-13c18/19o
tr|A0A0W0FBP2|A0A0W0FBP2_MONRR	1	0	i141-164o
tr|A0AA39K707|A0AA39K707_9AGAR	0	Y	n3-13c18/19o
tr|A0A5C3EZH8|A0A5C3EZH8_9BASI	1	0	i158-179o
tr|W3XDE1|W3XDE1_PESFW	0	Y	n18-28c33/34o
tr|A0AA39GKP6|A0AA39GKP6_SARSR	0	0	i
tr|A0A124BUM3|A0A124BUM3_ASPNG	0	Y	n8-19c24/25o
tr|A0AAN6UMV2|A0AAN6UMV2_9PEZI	1	0	o352-376i
tr|A0A8H2Y6G4|A0A8H2Y6G4_9AGAM	2	0	o627-647i659-682o
tr|A0A5C3L523|A0A5C3L523_COPMA	1	0	o24-41i
tr|A0A0D6ERD7|A0A0D6ERD7_SPOSA	0	Y	n4-15c20/21o
tr|A0A5N6W2Q0|A0A5N6W2Q0_9EURO	0	0	i
tr|A0A2C5XT27|A0A2C5XT27_9HYPO	0	Y	n12-25c30/31o
tr|A0A9P7SR09|A0A9P7SR09_9HYPO	0	0	i
tr|A0AAD4BR73|A0AAD4BR73_BOLED	0	0	i
tr|A0A4S4LY20|A0A4S4LY20_9AGAM	0	Y	n14-22c27/28o
tr|A0A9P9WKJ1|A0A9P9WKJ1_9PEZI	0	0	i
tr|A0A0C3JF88|A0A0C3JF88_PISTI	0	Y	n7-18c29/30o
tr|A0A9P5Q3U6|A0A9P5Q3U6_9AGAR	0	Y	n6-14c18/19o
tr|A0A9P6RPM3|A0A9P6RPM3_9FUNG	0	0	i
tr|A0AA40AHU5|A0AA40AHU5_9PEZI	0	0	i
tr|E3QZL2|E3QZL2_COLGM	0	0	i
tr|L7JNP2|L7JNP2_PYRO1	0	Y	n3-14c19/20o
tr|A0A368DXZ2|A0A368DXZ2_9PROT	16	0	o6-23i35-53o81-101i113-130o136-155i176-194o209-232i253-271o283-304i311-329o335-357i378-399o419-440i461-482o520-539i619-639o
tr|A0AAE8MLT2|A0AAE8MLT2_9HYPO	0	0	i
tr|A0AAN7C748|A0AAN7C748_9PEZI	0	Y	n3-13c17/18o
tr|A0A179F4J3|A0A179F4J3_METCM	0	0	i
tr|A0A364KVP2|A0A364KVP2_TALAM	0	0	i
tr|M7STF0|M7STF0_EUTLA	0	Y	n5-15c20/21o
tr|A0A397G6F2|A0A397G6F2_ASPTH	0	0	i
sp|O14405|LP9A_HYPJE	0	Y	n8-16c21/22o
tr|A0AAD7J7W9|A0AAD7J7W9_9AGAR	0	Y	n2-13c18/19o
tr|A0A1H0YRE7|A0A1H0YRE7_9EURY	0	0	i
tr|A0A401GS87|A0A401GS87_9APHY	0	0	i
tr|A0ABY7CY39|A0ABY7CY39_9BASI	0	Y	n6-17c21/22o
tr|A0A8H7Y1C2|A0A8H7Y1C2_PSICU	0	Y	n3-14c18/19o
tr|A0A1B8GBM3|A0A1B8GBM3_9PEZI	0	Y	n3-14c18/19o
tr|K1W7T5|K1W7T5_TRIAC	0	Y	n4-12c17/18o
tr|A0A0F4Z1H6|A0A0F4Z1H6_RASE3	0	Y	n11-21c25/26o
tr|A0A0D7BQD6|A0A0D7BQD6_9AGAR	0	0	i
tr|A0A8E5HM08|A0A8E5HM08_USTVR	0	Y	n4-14c19/20o
tr|R7S7N8|R7S7N8_TRAVS	1	0	o272-295i
tr|A0A9P8VZL8|A0A9P8VZL8_9HYPO	0	0	i
tr|A0A9P6CDK1|A0A9P6CDK1_9AGAR	1	0	i89-112o
tr|A0A9P9FLX2|A0A9P9FLX2_9HYPO	0	Y	n13-25c30/31o
tr|V2X962|V2X962_MONRO	0	Y	n3-10c15/16o
tr|A0AAN7W2L2|A0AAN7W2L2_9PEZI	0	Y	n2-12c17/18o
tr|A0A2S7YEA2|A0A2S7YEA2_BEABA	0	Y	n5-15c27/28o
tr|A0A1E3NQ76|A0A1E3NQ76_9ASCO	0	0	i
tr|A0A6A5X0D9|A0A6A5X0D9_9PLEO	0	Y	n4-13c18/19o
tr|A0A8H6Y2K4|A0A8H6Y2K4_9AGAR	1	Y	n4-15c33/34o552-574i
tr|A0A2T2NUH0|A0A2T2NUH0_CORCC	0	0	i
tr|A0AAD6G6V7|A0AAD6G6V7_9EURO	0	0	i
tr|A0A7D8YXH4|A0A7D8YXH4_9HELO	0	0	i
tr|A0A0B7KC65|A0A0B7KC65_BIOOC	0	Y	n6-17c23/24o
tr|K2RZE2|K2RZE2_MACPH	9	0	o44-63i75-93o99-119i131-151o163-183i203-222o242-261i273-290o296-320i
tr|A0A0G2H8G1|A0A0G2H8G1_9PEZI	1	0	i33-56o
tr|A0A165CQT5|A0A165CQT5_EXIGL	0	Y	n6-17c22/23o
tr|A0ABR4HYU4|A0ABR4HYU4_9EURO	0	0	i
tr|A0AAD6C6Q5|A0AAD6C6Q5_9EURO	0	Y	n10-17c22/23o
tr|A0A197JSD2|A0A197JSD2_9FUNG	0	0	i
tr|A0AA39Z1K9|A0AA39Z1K9_9PEZI	0	Y	n6-17c22/23o
tr|A0A9W9QM25|A0A9W9QM25_PENBR	0	Y	n6-13c18/19o
tr|A0AAN7SWS6|A0AAN7SWS6_9EURO	1	0	i258-279o
tr|A0A6A7BNG8|A0A6A7BNG8_9PLEO	0	Y	n9-20c25/26o
tr|A0A1Y1XE53|A0A1Y1XE53_9FUNG	0	Y	n5-15c20/21o
tr|A0ABN8NQ75|A0ABN8NQ75_9CNID	0	0	i
tr|A0A370TES8|A0A370TES8_9HELO	0	0	i
tr|A0A4Q4PNR2|A0A4Q4PNR2_9PLEO	0	Y	n5-12c17/18o
tr|A0A8H6S2W9|A0A8H6S2W9_9AGAR	0	0	i
tr|A0A8H5AXH0|A0A8H5AXH0_9AGAR	0	0	i
tr|A0A1V6QCU3|A0A1V6QCU3_9EURO	0	Y	n6-17c24/25o
tr|A0ABR0S4C7|A0ABR0S4C7_9EURO	0	Y	n4-14c19/20o
tr|A0AAD2HUG3|A0AAD2HUG3_9AGAR	0	Y	n5-12c17/18o
tr|A0A2T7A3Z3|A0A2T7A3Z3_TUBBO	1	0	i55-76o
tr|R4XBF7|R4XBF7_TAPDE	0	Y	n4-12c17/18o
tr|A0AAE8M4D3|A0AAE8M4D3_9HYPO	0	0	i
tr|A0A3M7EPG2|A0A3M7EPG2_HORWE	0	Y	n6-17c22/23o
tr|A0A8H8S408|A0A8H8S408_9HELO	0	Y	n4-15c23/24o
tr|A0A9P4JBR5|A0A9P4JBR5_9PLEO	0	0	i
tr|A0A1Q5Q747|A0A1Q5Q747_TALAT	0	Y	n10-22c27/28o
tr|A0A9P1ELX8|A0A9P1ELX8_CUSEU	0	0	i
tr|A0AAN6FI56|A0AAN6FI56_9PEZI	0	Y	n6-16c21/22o
tr|A0AB34FTB4|A0AB34FTB4_9HYPO	0	Y	n9-20c25/26o
tr|A0A9Q9AYS4|A0A9Q9AYS4_9PEZI	1	0	i41-61o
tr|A0A8H3H2W6|A0A8H3H2W6_9AGAM	0	0	i
tr|A0A066XWA4|A0A066XWA4_COLSU	0	Y	n3-13c17/18o
tr|A0A9P3FBQ3|A0A9P3FBQ3_9PEZI	1	0	i75-93o
tr|A0A0C3QBE1|A0A0C3QBE1_9AGAM	0	Y	n4-15c20/21o
tr|A0AA40BS06|A0AA40BS06_9PEZI	0	Y	n6-17c22/23o
tr|A0ABY7CNW5|A0ABY7CNW5_9BASI	0	Y	n6-18c23/24o
tr|A0A5K1JUE1|A0A5K1JUE1_9APHY	0	0	i
tr|A0A427YUY8|A0A427YUY8_9TREE	0	0	i
tr|A0A1B9IZL7|A0A1B9IZL7_9TREE	1	0	i188-211o
tr|A0A4Q9N2B7|A0A4Q9N2B7_9APHY	0	Y	n25-36c41/42o
tr|W4KDN8|W4KDN8_HETIT	0	0	i
tr|A0A1X2HPK9|A0A1X2HPK9_SYNRA	0	Y	n3-14c19/20o
tr|A0A507BG96|A0A507BG96_9PEZI	0	Y	n8-16c21/22o
tr|A0A2W1DCX3|A0A2W1DCX3_9PLEO	0	Y	n4-11c17/18o
tr|A0A9X0BXB7|A0A9X0BXB7_9EURO	0	Y	n10-20c25/26o
tr|A0A0D1ZWI6|A0A0D1ZWI6_9EURO	0	Y	n6-17c22/23o
tr|A0A8B8IST4|A0A8B8IST4_VANTA	6	0	i387-405o417-437i458-483o495-519i526-545o606-629i
tr|A0A9P4LSS8|A0A9P4LSS8_9PLEO	0	0	i
tr|J4H3Y7|J4H3Y7_9APHY	0	0	i
tr|A0A369JX93|A0A369JX93_HYPMA	1	0	i100-123o
tr|A0ABZ3FUG1|A0ABZ3FUG1_ACHDE	0	0	i
tr|H0EMB0|H0EMB0_GLAL7	0	Y	n3-13c18/19o
tr|A0A439DDS0|A0A439DDS0_9PEZI	1	Y	n3-11c16/17o470-493i
tr|K5WXU8|K5WXU8_AGABU	0	Y	n7-15c20/21o
tr|A0A2S4VXI1|A0A2S4VXI1_9BASI	0	Y	n28-39c44/45o
tr|A0A137NZN4|A0A137NZN4_CONC2	0	0	i
tr|U4LFR5|U4LFR5_PYROM	0	0	i
tr|A0AAQ3R962|A0AAQ3R962_9PEZI	0	Y	n6-17c23/24o
tr|A0A9P8FXY6|A0A9P8FXY6_AURME	1	0	i409-433o
tr|A0A9P5S424|A0A9P5S424_9FUNG	1	0	i561-582o
tr|A0A6A5KHF1|A0A6A5KHF1_9PLEO	0	Y	n4-14c19/20o
tr|A0A9W8WSV8|A0A9W8WSV8_9PLEO	0	Y	n14-24c31/32o
tr|A0A6A6TQB3|A0A6A6TQB3_9PLEO	0	Y	n5-13c18/19o
tr|A0A0G2EQ27|A0A0G2EQ27_PHACM	1	0	i208-232o
tr|A0A4U0WIA4|A0A4U0WIA4_9PEZI	0	0	i
tr|A0A1Y2AGW1|A0A1Y2AGW1_9FUNG	0	Y	n4-15c19/20o
tr|A0A1V6R3L2|A0A1V6R3L2_9EURO	0	0	i
tr|A0A7R7ZS19|A0A7R7ZS19_ASPCH	0	Y	n9-19c27/28o
tr|L8FP75|L8FP75_PSED2	0	Y	n3-14c19/20o
tr|A0ABR4BRJ1|A0ABR4BRJ1_9HELO	0	Y	n3-14c19/20o
tr|A0A135V522|A0A135V522_9PEZI	0	Y	n4-14c22/23o
tr|B8MDH2|B8MDH2_TALSN	0	0	i
tr|A0A6A6SSI4|A0A6A6SSI4_9PLEO	0	0	i
tr|A0A5C3PXD2|A0A5C3PXD2_9APHY	0	Y	n3-11c16/17o
tr|A8NIX3|A8NIX3_COPC7	1	0	i39-57o
tr|A0A4Z0PA08|A0A4Z0PA08_9BACT	0	Y	n4-14c19/20o
tr|A0A2I1D488|A0A2I1D488_ASPC2	0	0	i
tr|B8M3V4|B8M3V4_TALSN	0	0	i
tr|A0A6P8BG94|A0A6P8BG94_PYRGI	0	Y	n2-13c18/19o
tr|A0A4R8Q292|A0A4R8Q292_9PEZI	0	Y	n10-20c25/26o
tr|A0A067NPC1|A0A067NPC1_PLEO1	1	0	i7-28o
tr|W5S2N8|W5S2N8_GRIFR	0	Y	n4-16c21/22o
tr|A0A8H5PE15|A0A8H5PE15_9HYPO	0	0	i
tr|A0A0R1ZJ74|A0A0R1ZJ74_9LACO	8	0	i21-41o354-376i399-427o447-468i519-539o746-768i802-823o843-861i
tr|A0AAN6YB72|A0AAN6YB72_9PEZI	0	Y	n6-14c19/20o
tr|A0A0C3L135|A0A0C3L135_9AGAM	0	0	i
tr|A0A1Y1VQL2|A0A1Y1VQL2_9FUNG	0	0	i
tr|A0AAD9MES1|A0AAD9MES1_9PEZI	0	Y	n4-15c27/28o
tr|A0A5K1JZP9|A0A5K1JZP9_9APHY	0	Y	n11-26c34/35o
tr|A0A3S9IEM9|A0A3S9IEM9_9ACTN	0	0	i
tr|A0A9P7Z8C7|A0A9P7Z8C7_9HELO	0	Y	n5-16c28/29o
tr|A0A2J6TGI0|A0A2J6TGI0_9HELO	0	Y	n2-13c17/18o
tr|A0A9W8MPC0|A0A9W8MPC0_9AGAR	0	Y	n4-15c20/21o
tr|A0AA40BQT3|A0AA40BQT3_9PEZI	0	Y	n6-17c25/26o
tr|A0AAP2GR49|A0AAP2GR49_9BACT	0	0	i
tr|A0A8H7NAP6|A0A8H7NAP6_BIOOC	0	Y	n4-15c19/20o
tr|A0A369JHY8|A0A369JHY8_HYPMA	0	Y	n5-14c19/20o
tr|A0A8E2JGK9|A0A8E2JGK9_9PEZI	0	Y	n3-15c20/21o
tr|A0A166T9L9|A0A166T9L9_9PEZI	0	Y	n4-12c17/18o
tr|A0A7L4C9G7|A0A7L4C9G7_9AVES	0	Y	n4-12c17/18o
tr|A0A9W9DHD5|A0A9W9DHD5_9AGAR	0	Y	n2-9c13/14o
tr|A0AAD5SZ35|A0AAD5SZ35_9FUNG	1	0	o29-48i
tr|A0A0C9XF46|A0A0C9XF46_9AGAR	0	Y	n3-11c16/17o
tr|A0A0B7FTH5|A0A0B7FTH5_THACB	0	0	i
tr|A0A9P7B0J9|A0A9P7B0J9_9HELO	0	0	i
tr|A0A9P8J2A0|A0A9P8J2A0_AURME	0	Y	n3-14c19/20o
tr|A0AAW0Z382|A0AAW0Z382_9TREE	0	0	i
tr|A0A8H5M6E3|A0A8H5M6E3_9AGAR	3	0	i21-41o47-63i75-95o
tr|A0A8J7T807|A0A8J7T807_ATRSP	11	0	i7-28o34-57i82-103o123-141i153-172o192-211i232-251o271-289i318-338o344-365i377-397o
tr|A0A317VUG0|A0A317VUG0_9EURO	0	0	i
tr|A0A6G1HQH8|A0A6G1HQH8_9PEZI	1	0	i222-244o
tr|A0A2N1JGI5|A0A2N1JGI5_9BASI	0	0	i
tr|A0A367XTH2|A0A367XTH2_9ASCO	0	Y	n6-14c20/21o
tr|A0A9P5XJ48|A0A9P5XJ48_9AGAR	0	0	i
tr|A0AAE0MA17|A0AAE0MA17_9PEZI	0	Y	n7-18c26/27o
tr|A0A175VZS7|A0A175VZS7_9PEZI	0	0	i
tr|A0A163GBC2|A0A163GBC2_DIDRA	0	Y	n3-13c18/19o
tr|A0AAN6KD81|A0AAN6KD81_9PEZI	0	0	i
tr|A0A561CHH5|A0A561CHH5_9BURK	7	0	o12-34i46-66o72-91i112-130o136-153i160-178o198-218i
tr|A0A5N6TKA6|A0A5N6TKA6_9EURO	0	Y	n7-18c25/26o
tr|A0A1R1X218|A0A1R1X218_9FUNG	0	0	i
tr|A0ABP6ANK8|A0ABP6ANK8_9ACTN	0	0	i
tr|A0AAF0DIB3|A0AAF0DIB3_9EURO	0	Y	n3-14c19/20o
tr|M5CAM2|M5CAM2_THACB	0	Y	n4-14c19/20o
tr|A0A8H7D7T9|A0A8H7D7T9_9AGAR	1	0	i86-107o
tr|A0AAD7AYH8|A0AAD7AYH8_MYCRO	0	Y	n4-17c22/23o
tr|A0AAD6CE18|A0AAD6CE18_9EURO	0	Y	n4-14c19/20o
tr|A0ABR4L587|A0ABR4L587_9EURO	0	Y	n4-15c20/21o
tr|A0A1X2J224|A0A1X2J224_9FUNG	0	0	i
tr|A0A3M7DQJ3|A0A3M7DQJ3_HORWE	0	Y	n6-17c22/23o
tr|A0A2G5HXK2|A0A2G5HXK2_CERBT	1	0	i275-292o
tr|A0A5C3LXQ4|A0A5C3LXQ4_9AGAR	0	Y	n6-13c18/19o
tr|G2QXD2|G2QXD2_THETT	0	Y	n7-18c24/25o
tr|A0AAN7W8N6|A0AAN7W8N6_9PEZI	0	Y	n8-19c27/28o
tr|A0A8H5HNS8|A0A8H5HNS8_9AGAR	1	0	i166-190o
tr|A0AAN6P5C8|A0AAN6P5C8_9PEZI	0	0	i
tr|A0A2D3VN62|A0A2D3VN62_9PEZI	0	Y	n4-12c17/18o
tr|K5WTS1|K5WTS1_AGABU	0	0	i
tr|W3WW07|W3WW07_PESFW	1	Y	n4-11c16/17o432-453i
tr|A0A2T0AH75|A0A2T0AH75_RHOTO	2	0	o311-329i434-461o
tr|A0A6J3M0B3|A0A6J3M0B3_9PEZI	0	Y	n6-16c21/22o
tr|A0ABQ0MC90|A0ABQ0MC90_MYCCL	0	Y	n9-19c25/26o
tr|A0A8X7MKG7|A0A8X7MKG7_9BASI	0	0	i
tr|A0AA39YC99|A0AA39YC99_9PEZI	0	Y	n5-16c24/25o
tr|A0A4Q4N2P3|A0A4Q4N2P3_ALTAL	0	0	i
tr|A0A8H7ST76|A0A8H7ST76_9FUNG	1	Y	n4-15c20/21o535-558i
tr|A0A1Y1V7S6|A0A1Y1V7S6_9FUNG	0	Y	n4-15c20/21o
tr|A0ABP8XHS4|A0ABP8XHS4_9ACTN	0	0	i
tr|A0A0U4ZWR0|A0A0U4ZWR0_ASPCI	0	0	i
tr|A0A8H5B9N3|A0A8H5B9N3_9AGAR	0	Y	n3-14c19/20o
tr|A0A9P4WCX0|A0A9P4WCX0_CURKU	0	0	i
tr|A0A6A6WBK8|A0A6A6WBK8_9PEZI	1	0	i338-362o
tr|A0A067M0A2|A0A067M0A2_BOTB1	0	Y	n3-12c18/19o
tr|A0A8H7HT37|A0A8H7HT37_9AGAM	0	0	i
tr|A0A1Q2YEW0|A0A1Q2YEW0_9ASCO	0	0	i
tr|A0A3M0IUT2|A0A3M0IUT2_HIRRU	2	0	o294-319i326-359o
tr|H0EHI5|H0EHI5_GLAL7	0	Y	n6-16c21/22o
tr|A0A3M7ANL2|A0A3M7ANL2_HORWE	0	Y	n4-14c19/20o
tr|A0A9W9W0D1|A0A9W9W0D1_9EURO	0	0	i
tr|F4RA41|F4RA41_MELLP	1	0	i62-84o
tr|A8NRC9|A8NRC9_COPC7	0	Y	n4-14c19/20o
tr|A0A9P4WD26|A0A9P4WD26_CURKU	0	Y	n6-15c20/21o
tr|A0A3R7ITC4|A0A3R7ITC4_9BURK	0	Y	n13-22c30/31o
tr|A0A0C3CI02|A0A0C3CI02_PILCF	0	Y	n4-15c20/21o
tr|A0A5C3QPL3|A0A5C3QPL3_9AGAR	1	0	i116-137o
tr|A0A5C3F648|A0A5C3F648_9BASI	0	Y	n4-15c33/34o
tr|A0AA38RP01|A0AA38RP01_9PEZI	0	Y	n7-18c23/24o
tr|A0A1Y2GEC0|A0A1Y2GEC0_9FUNG	0	0	i
tr|A0A2T3YXQ6|A0A2T3YXQ6_TRIA4	0	Y	n3-14c19/20o
tr|A0A5N6U5N3|A0A5N6U5N3_9EURO	0	Y	n4-15c20/21o
tr|A0A7R7ZIL4|A0A7R7ZIL4_ASPCH	0	Y	n3-11c16/17o
tr|A0A8K0UHZ7|A0A8K0UHZ7_9AGAR	0	Y	n7-18c28/29o
tr|A0A9P7DG53|A0A9P7DG53_9AGAM	0	Y	n2-12c17/18o
tr|A0A9Q9DPB0|A0A9Q9DPB0_CURCL	3	0	i108-128o134-156i205-223o
tr|A0AAD7A1N6|A0AAD7A1N6_9AGAR	0	Y	n2-12c17/18o
tr|A0AAD7SFK1|A0AAD7SFK1_9TELE	0	Y	n4-17c24/25o
tr|A0A2W1DIC6|A0A2W1DIC6_9PLEO	0	Y	n3-12c17/18o
tr|A0A0G2DRK3|A0A0G2DRK3_9PEZI	0	Y	n4-14c18/19o
tr|C0A1H1|C0A1H1_9AGAM	0	Y	n4-14c19/20o
tr|A0A931F086|A0A931F086_9ACTN	0	0	i
tr|A0A1K0HCA5|A0A1K0HCA5_9BASI	0	Y	n10-21c26/27o
tr|A0A8H6AM04|A0A8H6AM04_9HELO	0	Y	n5-17c22/23o
tr|A0A8H2XZH2|A0A8H2XZH2_9AGAM	0	Y	n3-14c18/19o
tr|A0A2T4A3D7|A0A2T4A3D7_TRIHA	0	Y	n8-16c21/22o
tr|A0A8H6Y8L9|A0A8H6Y8L9_9AGAR	1	0	i147-169o
tr|A0A5N7BDK9|A0A5N7BDK9_9EURO	0	Y	n3-16c21/22o
tr|A0A8H7TGY3|A0A8H7TGY3_9HELO	0	0	i
tr|A0A0G4LDZ3|A0A0G4LDZ3_VERLO	1	0	i259-280o
tr|A0A5N6EWD1|A0A5N6EWD1_9EURO	0	0	i
tr|A0A9W8XHF3|A0A9W8XHF3_9PLEO	0	Y	n3-14c19/20o
tr|A0AAJ0UFD9|A0AAJ0UFD9_HALSE	0	Y	n8-18c25/26o
tr|A0A194XCD0|A0A194XCD0_MOLSC	0	0	i
tr|A0A367KVW4|A0A367KVW4_RHIST	1	Y	n3-14c19/20o504-528i
tr|A0A6P1E4B3|A0A6P1E4B3_LENHI	0	Y	n7-18c22/23o
tr|A0A084QS79|A0A084QS79_STAC4	0	Y	n2-10c15/16o
tr|A0A9P8VXF8|A0A9P8VXF8_9HYPO	0	0	i
tr|A0A8J2NPS5|A0A8J2NPS5_FUSEQ	0	0	i
tr|A0A6G1KUB3|A0A6G1KUB3_9PEZI	0	0	i
tr|A0AAW0YT55|A0AAW0YT55_9TREE	0	0	i
tr|A0A8H6NHN6|A0A8H6NHN6_9PEZI	0	Y	n9-16c21/22o
tr|A0A0L0TCY2|A0A0L0TCY2_ALLM3	0	Y	n7-18c26/27o
tr|Q2H7X4|Q2H7X4_CHAGB	0	Y	n3-13c18/19o
tr|A0A0B7FWJ6|A0A0B7FWJ6_THACB	0	0	i
tr|A0A0F9PXU9|A0A0F9PXU9_9ZZZZ	0	0	i
tr|A0A397G3N1|A0A397G3N1_ASPTH	0	Y	n6-17c21/22o
tr|A0A9Q5HZ33|A0A9Q5HZ33_SANBA	2	Y	n7-15c19/20o734-753i765-788o
tr|A0ABR3V574|A0ABR3V574_HUMIN	0	Y	n9-16c21/22o
tr|A0A6A4HC33|A0A6A4HC33_9AGAR	0	0	i
tr|A0A420QV43|A0A420QV43_FUSOX	0	Y	n7-17c23/24o
tr|A0AAD5X5B1|A0AAD5X5B1_9FUNG	5	0	o813-832i853-873o902-923i935-957o969-988i
tr|A0AAJ0BJ65|A0AAJ0BJ65_9PEZI	0	Y	n5-13c20/21o
tr|A0AAD4NT17|A0AAD4NT17_9PLEO	0	Y	n5-16c21/22o
tr|A0A5M3MDB6|A0A5M3MDB6_CONPW	0	0	i
tr|A0AAF0EUS9|A0AAF0EUS9_9BASI	0	Y	n5-16c20/21o
tr|A0A1B9IF82|A0A1B9IF82_9TREE	0	Y	n5-12c17/18o
tr|A0A2H3JS03|A0A2H3JS03_WOLCO	0	0	i
tr|A0AAN6F318|A0AAN6F318_EXODE	1	0	i370-392o
tr|A0A0D2KUE6|A0A0D2KUE6_HYPSF	0	Y	n5-15c20/21o
tr|A0A0C3ARR3|A0A0C3ARR3_9AGAM	1	0	i34-57o
tr|A0A1V6V1E0|A0A1V6V1E0_9EURO	0	0	i
tr|A0A165RXM4|A0A165RXM4_9AGAM	0	Y	n12-20c25/26o
tr|A0A4S4L878|A0A4S4L878_9AGAM	0	Y	n14-26c34/35o
tr|A0A9P8UT94|A0A9P8UT94_9PEZI	0	Y	n6-15c20/21o
tr|A0A9P7SH49|A0A9P7SH49_9HYPO	0	Y	n7-18c25/26o
tr|A0A5C2RY56|A0A5C2RY56_9APHY	0	Y	n7-18c23/24o
tr|C7ZM03|C7ZM03_FUSV7	0	Y	n3-11c16/17o
tr|A0AAN6JNT9|A0AAN6JNT9_9BASI	0	0	i
tr|A0A4S3IZ24|A0A4S3IZ24_9EURO	0	Y	n3-10c15/16o
tr|A0A2C5Y199|A0A2C5Y199_9HYPO	1	0	i156-178o
tr|A0ABT1KCE2|A0ABT1KCE2_9ACTN	2	0	o12-35i152-175o
tr|A0A2H3TZX1|A0A2H3TZX1_FUSOX	0	0	i
tr|A0A5C3EIS9|A0A5C3EIS9_9BASI	0	Y	n8-19c24/25o
tr|A0A9P5SRV7|A0A9P5SRV7_9FUNG	2	0	i449-468o480-505i
tr|A0AAE0WYM5|A0AAE0WYM5_9PEZI	0	Y	n8-15c20/21o
tr|A0A8H8QX79|A0A8H8QX79_9HELO	0	Y	n2-12c17/18o
tr|A0A8H4RBB2|A0A8H4RBB2_9HELO	0	Y	n3-14c20/21o
tr|A0ABQ8VZT9|A0ABQ8VZT9_9AGAR	0	Y	n2-10c15/16o
tr|A0A9Q8ZD88|A0A9Q8ZD88_CURCL	0	Y	n4-15c20/21o
tr|A0A9N9XYT3|A0A9N9XYT3_9HYPO	0	0	i
tr|A0A1J8PKA4|A0A1J8PKA4_9AGAM	1	0	i425-448o
tr|A0A2H3DXF3|A0A2H3DXF3_ARMGA	0	0	i
tr|A0A9W8JK51|A0A9W8JK51_9AGAR	1	0	i49-74o
tr|A0A066XJI5|A0A066XJI5_COLSU	0	0	i
tr|A0A2T3ZXR7|A0A2T3ZXR7_TRIHA	0	Y	n2-10c15/16o
tr|A0A8H4KDX3|A0A8H4KDX3_9HYPO	0	Y	n6-14c19/20o
tr|A0A6H5IGG3|A0A6H5IGG3_9HYME	0	0	i
tr|A0A017SP26|A0A017SP26_ASPRC	1	0	i276-300o
tr|A0A6A6EC95|A0A6A6EC95_9PEZI	0	Y	n5-13c18/19o
tr|A0ABP2RE30|A0ABP2RE30_9LEPT	0	0	i
tr|A0A8H5KAG2|A0A8H5KAG2_9HYPO	0	0	i
tr|A0A9P9A733|A0A9P9A733_9PEZI	0	Y	n4-14c19/20o
tr|G8GBT7|G8GBT7_ASPAC	0	0	i
tr|A0A8K0NL75|A0A8K0NL75_9HYPO	0	Y	n4-15c24/25o
tr|C5M7X3|C5M7X3_CANTT	0	0	i
tr|A0A8H5F2W1|A0A8H5F2W1_9AGAR	1	Y	n3-14c19/20o573-596i
tr|A0A2G8SBR4|A0A2G8SBR4_9APHY	0	0	i
tr|R7YUK3|R7YUK3_CONA1	0	Y	n2-12c17/18o
tr|A0A177ABJ2|A0A177ABJ2_9PEZI	0	0	i
tr|A0A2H3D4C2|A0A2H3D4C2_ARMGA	0	Y	n4-12c17/18o
tr|A0A232LQC0|A0A232LQC0_9EURO	0	Y	n7-18c23/24o
tr|G9MSH8|G9MSH8_HYPVG	0	Y	n6-14c19/20o
tr|K7TM35|K7TM35_PHACH	0	Y	n4-15c19/20o
tr|A0A8T9B4V1|A0A8T9B4V1_9HELO	0	0	i
tr|A0A1Y2ATI2|A0A1Y2ATI2_9TREE	1	0	i24-47o
tr|A0A9P4J355|A0A9P4J355_9PEZI	0	0	i
tr|A0A1G4K1J1|A0A1G4K1J1_9SACH	0	0	i
tr|A0A8S0XZE6|A0A8S0XZE6_CYCAE	0	Y	n9-19c27/28o
tr|A0A6A6XSM0|A0A6A6XSM0_9PLEO	0	0	i
tr|A0AA39UC97|A0AA39UC97_9AGAR	0	0	i
tr|C9SYA5|C9SYA5_VERA1	0	Y	n3-14c19/20o
tr|A0A1Q5UGE4|A0A1Q5UGE4_9EURO	0	0	i
tr|A0A7D8V149|A0A7D8V149_VANHU	1	0	o587-606i
tr|A0AAQ3RCF1|A0AAQ3RCF1_9PEZI	0	Y	n3-11c16/17o
tr|A0A5C3LXD1|A0A5C3LXD1_9AGAR	0	Y	n7-17c25/26o
tr|A0A2T9YLP9|A0A2T9YLP9_9FUNG	0	0	i
tr|A0A1C1CTV0|A0A1C1CTV0_9EURO	0	Y	n3-14c19/20o
tr|A0A0L6VVI2|A0A0L6VVI2_9BASI	0	0	i
tr|A0AA39GC01|A0AA39GC01_SARSR	0	Y	n3-10c17/18o
tr|D8Q7X1|D8Q7X1_SCHCM	0	Y	n2-16c20/21o
tr|A0AAN6Z9N3|A0AAN6Z9N3_9PEZI	0	Y	n4-15c19/20o
tr|A0A8G0L8A5|A0A8G0L8A5_9HYPO	0	Y	n3-14c18/19o
tr|A0A7D8Z489|A0A7D8Z489_VANHU	0	0	i
tr|A0ABQ8QWN5|A0ABQ8QWN5_FUSEQ	0	Y	n3-11c17/18o
tr|A8NM84|A8NM84_COPC7	0	Y	n6-17c21/22o
tr|G8A553|G8A553_FLAVE	0	0	i
tr|A0AAD7TJ09|A0AAD7TJ09_9APHY	2	0	o995-1016i1117-1136o
tr|A0AAE0HLH3|A0AAE0HLH3_9PEZI	1	0	i368-392o
tr|A0A8H5Z4W9|A0A8H5Z4W9_9HYPO	0	0	i
tr|A0A316WGQ4|A0A316WGQ4_9BASI	0	Y	n7-17c21/22o
tr|A0A2V5IW73|A0A2V5IW73_ASPV1	0	Y	n4-17c22/23o
tr|A0A9W7SNV8|A0A9W7SNV8_9PEZI	0	0	i
tr|B8MQ63|B8MQ63_TALSN	0	Y	n4-12c17/18o
tr|A0AA43QJF5|A0AA43QJF5_9LECA	0	Y	n7-16c21/22o
tr|A0AA39Z6G1|A0AA39Z6G1_9PEZI	0	Y	n3-14c19/20o
tr|A0A8H5HFP8|A0A8H5HFP8_9AGAR	0	Y	n3-13c18/19o
tr|A0A699W523|A0A699W523_TANCI	1	0	o20-39i
tr|W4K1F9|W4K1F9_HETIT	0	Y	n6-13c17/18o
tr|A0A411JJV5|A0A411JJV5_9PEZI	0	0	i
tr|A0AAD2K355|A0AAD2K355_9AGAR	1	0	o772-794i
tr|A0A448YMJ3|A0A448YMJ3_BRENA	0	0	i
tr|A0A8E2DXL0|A0A8E2DXL0_9PEZI	0	Y	n6-15c20/21o
tr|A0A1Y2DL93|A0A1Y2DL93_9PEZI	0	Y	n3-10c15/16o
tr|A0A8K0JLI5|A0A8K0JLI5_9TREE	0	0	i
tr|A0AAN7HNG7|A0AAN7HNG7_9FUNG	0	0	i
tr|A0ABY6ZMY2|A0ABY6ZMY2_9BACL	0	0	i
tr|A0AAD7U1L0|A0AAD7U1L0_9APHY	0	Y	n6-17c21/22o
tr|A0A063BWN6|A0A063BWN6_USTVR	0	0	i
tr|A0A9P8W2K6|A0A9P8W2K6_9HYPO	0	0	i
tr|A0A9P9D1Y0|A0A9P9D1Y0_9HYPO	0	Y	n3-13c17/18o
tr|G8A531|G8A531_FLAVE	1	Y	n7-15c19/20o35-55i
tr|A0ABR0HDB3|A0ABR0HDB3_9PEZI	0	0	i
tr|A0A0L0VUH3|A0A0L0VUH3_9BASI	0	Y	n6-17c22/23o
tr|A0A4Y6PUF1|A0A4Y6PUF1_PERCE	0	Y	n7-17c22/23o
tr|G5KDJ9|G5KDJ9_9STRE	2	0	i21-38o258-277i
tr|A0AA39XY19|A0AA39XY19_9PEZI	0	Y	n3-14c21/22o
tr|A0AAN6PA36|A0AAN6PA36_9PEZI	0	Y	n3-13c18/19o
tr|A0A5N5QHA9|A0A5N5QHA9_9AGAM	0	0	i
tr|A0A1X2HSF6|A0A1X2HSF6_SYNRA	0	0	i
tr|A0AAJ0BL22|A0AAJ0BL22_9PEZI	0	Y	n6-14c20/21o
tr|A0A433QGN7|A0A433QGN7_9FUNG	0	0	i
tr|A0A1X6N2G5|A0A1X6N2G5_9APHY	0	Y	n2-13c18/19o
tr|A0ABY7CNB8|A0ABY7CNB8_9BASI	0	Y	n4-15c23/24o
tr|A0A8H6FYC6|A0A8H6FYC6_9LECA	0	Y	n3-14c19/20o
tr|A0A1Y1Y6C9|A0A1Y1Y6C9_9PLEO	1	0	i333-354o
tr|A0AAD5EGM8|A0AAD5EGM8_UMBRA	0	Y	n6-17c22/23o
tr|A0A409VR38|A0A409VR38_PSICY	0	0	i
tr|A0A550CIW6|A0A550CIW6_9AGAR	1	0	o559-576i
tr|A0ABY1VQD7|A0ABY1VQD7_9ACTO	0	0	i
tr|A0A9W4N4H7|A0A9W4N4H7_9EURO	0	Y	n2-12c17/18o
tr|A0A0G2H605|A0A0G2H605_9PEZI	0	Y	n8-19c24/25o
tr|A0A5J5ELM3|A0A5J5ELM3_9PEZI	1	0	i7-27o
tr|A0A4Y7SN10|A0A4Y7SN10_COPMI	0	Y	n6-14c19/20o
tr|A0A367K0F4|A0A367K0F4_RHIAZ	0	Y	n3-13c18/19o
tr|A0A2T4BPZ8|A0A2T4BPZ8_TRILO	0	0	i
tr|A0A1B9IE62|A0A1B9IE62_9TREE	0	Y	n5-12c17/18o
tr|A0A4Q4PWQ1|A0A4Q4PWQ1_9PLEO	0	0	i
tr|A0AA90KGI2|A0AA90KGI2_9ACTN	1	0	i365-384o
tr|A0A4V1Q4U6|A0A4V1Q4U6_9AGAR	0	Y	n5-13c18/19o
tr|A0A5M3YVW1|A0A5M3YVW1_ASPTE	0	Y	n6-17c25/26o
tr|A0AAJ0G5D4|A0AAJ0G5D4_9PEZI	0	Y	n14-25c30/31o
tr|A0A0L0N9K7|A0A0L0N9K7_TOLOC	0	0	i
tr|A0ABR4FE10|A0ABR4FE10_9PEZI	0	0	i
tr|M9MHN2|M9MHN2_PSEA3	1	0	i240-261o
tr|A0A409XE89|A0A409XE89_PSICY	0	0	i
tr|A0A1Y2I9E0|A0A1Y2I9E0_TRAC3	1	0	i40-64o
tr|A0A5C3LU61|A0A5C3LU61_9AGAR	0	Y	n8-18c22/23o
tr|R9AFT8|R9AFT8_WALI9	0	0	i
tr|A0AA38L4Z7|A0AA38L4Z7_9AGAR	0	Y	n10-21c26/27o
tr|A0A369K5A1|A0A369K5A1_HYPMA	0	0	i
tr|A0A175WCP3|A0A175WCP3_9PEZI	0	Y	n4-11c16/17o
tr|A0A218Z6M0|A0A218Z6M0_9HELO	1	0	i84-107o
tr|A0A9W8X0U2|A0A9W8X0U2_9PLEO	0	Y	n7-16c21/22o
tr|A0A3M7M8W4|A0A3M7M8W4_9PLEO	0	0	i
tr|A0A2H1GAD2|A0A2H1GAD2_ZYMTR	0	0	i
tr|G8JR29|G8JR29_ERECY	0	Y	n11-22c32/33o
tr|A0A0N8H5W2|A0A0N8H5W2_9HYPO	0	Y	n6-13c18/19o
tr|A0A9W8V442|A0A9W8V442_9HYPO	0	Y	n3-14c20/21o
tr|A0A9W4MQI8|A0A9W4MQI8_PENNA	0	Y	n3-14c19/20o
tr|A0A853I5M3|A0A853I5M3_9GAMM	5	0	i9-27o100-121i133-155o185-205i292-315o
tr|B0Y8N4|B0Y8N4_ASPFC	0	Y	n6-14c19/20o
tr|A0A6H0Y3F6|A0A6H0Y3F6_9PEZI	0	Y	n4-15c20/21o
tr|A0A0C9U414|A0A0C9U414_SPHS4	0	0	i
tr|A0A8H4TE31|A0A8H4TE31_9HYPO	0	Y	n4-15c19/20o
tr|A0A8H5U661|A0A8H5U661_9HYPO	0	0	i
tr|A0AAE0H5N2|A0AAE0H5N2_9PEZI	0	Y	n4-16c20/21o
tr|V9M2L3|V9M2L3_RHIMI	0	Y	n4-19c24/25o
tr|A0A9P3CKM5|A0A9P3CKM5_9PEZI	0	0	i
tr|A0ABR1JJ92|A0ABR1JJ92_9AGAR	0	Y	n7-15c22/23o
tr|A0A9P6FG23|A0A9P6FG23_9FUNG	1	0	o285-308i
tr|A0A4S9L3J9|A0A4S9L3J9_AURPU	0	Y	n7-15c20/21o
tr|A0A9W8L3J5|A0A9W8L3J5_9FUNG	0	0	i
tr|A0AB74CM74|A0AB74CM74_ASPFL	0	Y	n7-18c23/24o
tr|A0A1X2HTD2|A0A1X2HTD2_SYNRA	0	Y	n3-13c18/19o
tr|A0AAD6CPW8|A0AAD6CPW8_PENGL	0	Y	n3-12c17/18o
tr|S3CNE9|S3CNE9_OPHP1	1	0	i96-117o
tr|A0A0C9Z990|A0A0C9Z990_9AGAM	1	0	i192-217o
tr|A0A0D2CHU2|A0A0D2CHU2_9EURO	0	Y	n3-14c19/20o
tr|A0A2C5YSW3|A0A2C5YSW3_9HYPO	1	0	o937-957i
tr|A0A9W8MAI0|A0A9W8MAI0_9AGAR	0	0	i
tr|A0A8H7WHK4|A0A8H7WHK4_9HELO	0	0	i
tr|A0A9P6UZG6|A0A9P6UZG6_9FUNG	0	Y	n7-15c24/25o
tr|A0A3N4KVR0|A0A3N4KVR0_9PEZI	0	Y	n5-13c18/19o
tr|A0A8H6SM10|A0A8H6SM10_9AGAR	0	Y	n3-13c18/19o
tr|A0A1J8Q1L0|A0A1J8Q1L0_9AGAM	0	Y	n6-17c22/23o
tr|A0AAN6TC13|A0AAN6TC13_9PEZI	0	Y	n4-15c27/28o
tr|A0A8H6JLR2|A0A8H6JLR2_9PEZI	0	Y	n4-15c23/24o
tr|A0A9W8U7X8|A0A9W8U7X8_9HYPO	0	0	i
tr|A0A9P6HP55|A0A9P6HP55_9AGAM	1	0	i156-178o
tr|E9EHL3|E9EHL3_METAQ	0	0	i
tr|A0A3D8RCN8|A0A3D8RCN8_9HELO	0	Y	n6-16c24/25o
tr|A0AAJ0GSB1|A0AAJ0GSB1_9PEZI	0	0	i
tr|A0A179GRM0|A0A179GRM0_PURLI	0	Y	n7-18c23/24o
tr|A0A4Y7QKA1|A0A4Y7QKA1_9AGAM	0	Y	n4-16c24/25o
tr|A0AAN7HHH0|A0AAN7HHH0_9PEZI	0	Y	n4-15c20/21o
tr|A0A9P8V1Y1|A0A9P8V1Y1_9PEZI	0	0	i
tr|G4N1Y8|G4N1Y8_PYRO7	0	Y	n3-10c14/15o
tr|A0A8H8P2P4|A0A8H8P2P4_9AGAM	0	Y	n3-13c17/18o
tr|A0A8H6T9E5|A0A8H6T9E5_MYCCL	0	Y	n7-18c22/23o
tr|A0A0P1BL68|A0A0P1BL68_9BASI	1	0	i186-212o
tr|A0A8H3GSE6|A0A8H3GSE6_9AGAM	0	0	i
tr|A0A364KZP1|A0A364KZP1_TALAM	0	0	i
tr|A0A9W8J9S7|A0A9W8J9S7_9AGAR	0	Y	n4-14c20/21o
tr|A0A4Y9XWG5|A0A4Y9XWG5_9AGAM	0	Y	n4-12c16/17o
tr|A0A409X928|A0A409X928_PSICY	0	0	i
tr|A0A6A6UUA5|A0A6A6UUA5_9PEZI	0	Y	n3-14c18/19o
tr|A0A4Z0YR22|A0A4Z0YR22_9PEZI	0	Y	n4-12c17/18o
tr|A0A8K0SSM5|A0A8K0SSM5_9HYPO	0	Y	n7-18c24/25o
tr|A0AAN9V294|A0AAN9V294_9PEZI	0	0	i
tr|A0A8H6JY53|A0A8H6JY53_9PEZI	0	Y	n4-15c20/21o
tr|A0A0F7S011|A0A0F7S011_9BASI	0	0	i
tr|A0A3A2ZNR2|A0A3A2ZNR2_9EURO	0	0	i
tr|A0A2H4SIC1|A0A2H4SIC1_CORMI	0	Y	n3-10c15/16o
tr|A0A9W8IU74|A0A9W8IU74_9AGAR	0	0	i
tr|A0A180GY67|A0A180GY67_PUCT1	0	0	i
tr|A0A8K0UIK1|A0A8K0UIK1_9AGAR	0	Y	n3-13c18/19o
tr|A0A8H5BWI3|A0A8H5BWI3_9AGAR	2	0	o2725-2742i2951-2972o
tr|A0A2T9Z6C8|A0A2T9Z6C8_9FUNG	0	Y	n5-16c21/22o
tr|A0A6A6D7G0|A0A6A6D7G0_9PEZI	0	0	i
tr|A0A4V6TNI1|A0A4V6TNI1_WALIC	0	Y	n3-13c18/19o
tr|A0A0B7G2D8|A0A0B7G2D8_THACB	0	0	i
tr|A0AA38RNT3|A0AA38RNT3_9PEZI	0	0	i
tr|A0A9Q0ARG0|A0A9Q0ARG0_9PEZI	1	0	i193-212o
tr|A0A1Y2ICD8|A0A1Y2ICD8_TRAC3	1	0	i87-110o
tr|A0A2T4BA99|A0A2T4BA99_9HYPO	0	Y	n4-15c20/21o
tr|A0ABD4Z4H8|A0ABD4Z4H8_9CREN	0	0	i
tr|A0A5N6Z6I3|A0A5N6Z6I3_9EURO	0	Y	n4-15c20/21o
tr|A0A9W8U425|A0A9W8U425_9HYPO	0	0	i
tr|A0A2U3EK37|A0A2U3EK37_PURLI	0	0	i
tr|W9Y2M2|W9Y2M2_9EURO	0	Y	n2-13c18/19o
tr|A0AAD7BVZ1|A0AAD7BVZ1_9AGAR	0	0	i
tr|A0A0G2F2C0|A0A0G2F2C0_PHACM	1	0	i20-40o
tr|A0AAN6MJ48|A0AAN6MJ48_9PEZI	1	0	i75-98o
tr|A0AAD5WMX4|A0AAD5WMX4_9PEZI	0	Y	n3-14c19/20o
tr|A0AAE8N5E2|A0AAE8N5E2_9PEZI	0	Y	n6-17c22/23o
tr|A0AAN6VR97|A0AAN6VR97_9PEZI	0	Y	n4-15c20/21o
tr|A0A0B7KMX5|A0A0B7KMX5_BIOOC	0	Y	n2-13c21/22o
tr|A0A1S9RG77|A0A1S9RG77_PENBI	0	Y	n4-14c18/19o
tr|A0A9W9RNK9|A0A9W9RNK9_9EURO	0	0	i
tr|A0A9N8KE59|A0A9N8KE59_9PEZI	0	Y	n3-14c22/23o
tr|A0A084FV90|A0A084FV90_PSEDA	1	0	i99-124o
tr|A0AAN6KK47|A0AAN6KK47_9PEZI	0	0	i
tr|A0A9N9KVV1|A0A9N9KVV1_9HELO	0	Y	n6-13c18/19o
tr|A0A1S9RHT1|A0A1S9RHT1_PENBI	0	Y	n8-16c22/23o
tr|A0A8H5Z6Z8|A0A8H5Z6Z8_9HYPO	0	0	i
tr|A0A5N6TYK4|A0A5N6TYK4_9EURO	0	0	i
tr|A0A0P1BKD3|A0A0P1BKD3_9BASI	0	0	i
tr|A0AAJ0M8L8|A0AAJ0M8L8_9PEZI	0	Y	n3-14c19/20o
tr|A0A9P3LX33|A0A9P3LX33_9FUNG	0	Y	n4-15c23/24o
tr|A0A066VKI6|A0A066VKI6_TILAU	0	Y	n7-17c35/36o
tr|K9GDL3|K9GDL3_PEND1	0	Y	n7-18c23/24o
tr|A0A8J5PDS5|A0A8J5PDS5_FUSOX	0	Y	n8-19c23/24o
tr|A0AA40BYQ0|A0AA40BYQ0_9PEZI	0	Y	n7-17c22/23o
tr|B2ADV9|B2ADV9_PODAN	1	0	i23-46o
tr|A0A8K0UEI9|A0A8K0UEI9_9AGAR	0	Y	n3-14c18/19o
tr|A0A9W4RUE2|A0A9W4RUE2_9PEZI	0	0	i
tr|A0A9W9G110|A0A9W9G110_9EURO	0	0	i
tr|S3E4N1|S3E4N1_GLAL2	0	Y	n7-15c21/22o
tr|A0AA40ANZ8|A0AA40ANZ8_9PEZI	0	0	i
tr|A0AA40C213|A0AA40C213_9PEZI	0	0	i
tr|A0AAJ0FUX5|A0AAJ0FUX5_9HYPO	0	Y	n4-14c19/20o
tr|A0A9N9B0K8|A0A9N9B0K8_9GLOM	0	0	i
tr|A0A0A2V4W1|A0A0A2V4W1_BEABA	0	Y	n10-22c26/27o
tr|A0A9P5NHM6|A0A9P5NHM6_GYMJU	0	0	i
tr|A0A384JT83|A0A384JT83_BOTFB	1	0	i79-102o
tr|A0A9W8TKQ0|A0A9W8TKQ0_9PEZI	0	Y	n11-22c27/28o
tr|A0A371DDR0|A0A371DDR0_9APHY	0	Y	n10-18c23/24o
tr|A0A512M2T8|A0A512M2T8_9BACT	0	Y	n13-21c26/27o
tr|A0A9W8JYZ4|A0A9W8JYZ4_9AGAR	0	0	i
tr|A0A9W9GC95|A0A9W9GC95_9EURO	0	Y	n6-17c25/26o
tr|A0A9P6EFL9|A0A9P6EFL9_9AGAR	0	Y	n9-17c25/26o
tr|A0A2X0MW85|A0A2X0MW85_9BASI	1	0	i170-192o
tr|A0AAD4BZ01|A0AAD4BZ01_BOLED	1	0	i40-58o
tr|A0A0G4LSC4|A0A0G4LSC4_VERLO	0	Y	n3-13c18/19o
tr|A0A9Q3GQ06|A0A9Q3GQ06_9BASI	0	Y	n6-19c24/25o
tr|A0A0U5GSK7|A0A0U5GSK7_ASPCI	0	0	i
tr|A0A067NB35|A0A067NB35_PLEO1	0	Y	n3-13c18/19o
tr|A0A1C7N730|A0A1C7N730_9FUNG	0	0	i
tr|F9XPT9|F9XPT9_ZYMTI	0	0	i
tr|A0A317VMS4|A0A317VMS4_9EURO	0	Y	n3-14c19/20o
tr|A0AAN6EXI0|A0AAN6EXI0_EXODE	0	Y	n12-23c28/29o
tr|A0A316Z1G0|A0A316Z1G0_9BASI	0	Y	n3-15c23/24o
tr|V2YZW2|V2YZW2_MONRO	1	0	i141-164o
tr|A0A8H7EZ37|A0A8H7EZ37_AGABI	1	0	i410-433o
tr|A8N894|A8N894_COPC7	0	Y	n7-18c28/29o
tr|A0A2R6NWP7|A0A2R6NWP7_9APHY	0	Y	n4-15c21/22o
tr|R1G8C1|R1G8C1_BOTPV	0	0	i
tr|A0A5C3L2H2|A0A5C3L2H2_COPMA	0	Y	n4-11c16/17o
tr|A0ABR0RDX3|A0ABR0RDX3_9EURO	0	0	i
tr|A0A0J9X2I4|A0A0J9X2I4_GEOCN	0	Y	n7-18c23/24o
tr|Q5KKL7|Q5KKL7_CRYD1	0	Y	n3-11c18/19o
tr|A0A553IC44|A0A553IC44_9PEZI	0	Y	n5-15c21/22o
tr|A0A9P5L9Y1|A0A9P5L9Y1_9HYPO	0	Y	n9-19c23/24o
tr|A0A9W9A309|A0A9W9A309_9AGAR	0	Y	n10-21c29/30o
tr|A0A6A6BKK1|A0A6A6BKK1_9PEZI	0	Y	n4-15c19/20o
tr|A0A2K1JEQ7|A0A2K1JEQ7_PHYPA	0	0	i
tr|A0A084GGV0|A0A084GGV0_PSEDA	0	Y	n3-11c16/17o
tr|A0ABQ0G173|A0ABQ0G173_9PEZI	2	0	o296-317i381-405o
tr|A0AB74JNU3|A0AB74JNU3_AURPU	0	Y	n5-15c20/21o
tr|A0A8H3FYL8|A0A8H3FYL8_9LECA	0	0	i
tr|A0A286UUA8|A0A286UUA8_9AGAM	1	0	i99-123o
tr|A0AA40DXT4|A0AA40DXT4_9PEZI	0	Y	n15-25c30/31o
tr|A0ABR5B753|A0ABR5B753_CRYGA	0	0	i
tr|A0A9W8IRQ9|A0A9W8IRQ9_9FUNG	0	0	i
tr|A0AAN6TWP6|A0AAN6TWP6_9PEZI	0	Y	n6-17c21/22o
tr|A0A2T9YVC1|A0A2T9YVC1_9FUNG	0	Y	n4-14c21/22o
tr|A0A2W1HSC0|A0A2W1HSC0_9PLEO	1	0	i246-266o
tr|A0A127ZE33|A0A127ZE33_9BASI	0	Y	n5-16c21/22o
tr|A0A3N4L381|A0A3N4L381_9PEZI	0	Y	n12-23c28/29o
tr|A0A423X7J1|A0A423X7J1_9PEZI	0	Y	n12-23c31/32o
tr|A0AAE0NP96|A0AAE0NP96_9PEZI	0	Y	n8-16c21/22o
tr|A0AA39YYI0|A0AA39YYI0_9PEZI	0	Y	n4-15c22/23o
tr|A0A0J8RE97|A0A0J8RE97_COCIT	5	0	o62-79i99-119o234-257i264-286o382-403i
tr|A0A2V1E7C6|A0A2V1E7C6_9PLEO	1	0	i93-116o
tr|A0AAN6JME5|A0AAN6JME5_9BASI	1	0	o226-247i
tr|A0A5N6TFU5|A0A5N6TFU5_9EURO	0	Y	n6-17c25/26o
tr|A0AAF0DKS3|A0AAF0DKS3_9EURO	0	0	i
tr|A0A4Z1PLT3|A0A4Z1PLT3_9PEZI	1	0	i347-368o
tr|A0A4R0S4I8|A0A4R0S4I8_9APHY	0	0	i
tr|A0A067PE74|A0A067PE74_PLEO1	0	Y	n4-14c19/20o
tr|A0A409XWZ8|A0A409XWZ8_9AGAR	1	0	i79-100o
tr|W9YFF1|W9YFF1_9EURO	0	0	i
tr|A0AAJ0CVV3|A0AAJ0CVV3_9HYPO	0	Y	n5-16c24/25o
tr|A0A8H4KIP0|A0A8H4KIP0_9HYPO	0	Y	n3-14c20/21o
tr|A0A9P5AEE3|A0A9P5AEE3_9HYPO	0	0	i
tr|A0A8T9CD21|A0A8T9CD21_9HELO	0	0	i
tr|A0A1V8TN04|A0A1V8TN04_9PEZI	1	Y	n4-15c20/21o805-827i
tr|A0A6A5QWP9|A0A6A5QWP9_AMPQU	0	Y	n5-13c18/19o
tr|A0A1E3J8Y7|A0A1E3J8Y7_9TREE	0	Y	n9-20c25/26o
tr|A0A0A1SVP1|A0A0A1SVP1_9HYPO	0	Y	n4-12c17/18o
tr|A0A166A1I6|A0A166A1I6_9AGAM	0	Y	n2-13c18/19o
tr|A0AA39N4P1|A0AA39N4P1_ARMTA	2	0	o324-345i556-578o
tr|A0ABR3TCQ6|A0ABR3TCQ6_9PEZI	0	0	i
tr|A0AAW0YWD6|A0AAW0YWD6_9TREE	1	0	i208-229o
tr|A0A7Z1TAC5|A0A7Z1TAC5_SALET	0	0	i
tr|A0A4R8RYX8|A0A4R8RYX8_COLTR	0	Y	n7-18c25/26o
tr|U4L7R8|U4L7R8_PYROM	0	0	i
tr|A0A9P9I7V5|A0A9P9I7V5_9HYPO	0	Y	n10-21c25/26o
tr|A0A8H6RGS1|A0A8H6RGS1_9PEZI	1	Y	n2-10c15/16o25-42i
tr|A8PFU7|A8PFU7_COPC7	0	Y	n10-22c27/28o
tr|A0A9W8YAV2|A0A9W8YAV2_9PLEO	0	0	i
tr|Q9C3Z9|Q9C3Z9_9AGAR	0	0	i
tr|A0A507DKC1|A0A507DKC1_9FUNG	0	0	i
tr|A0A2B7XTZ8|A0A2B7XTZ8_9EURO	0	Y	n3-14c19/20o
tr|A0A1S7UP01|A0A1S7UP01_ROSNE	0	Y	n2-13c18/19o
tr|A0A0K3CL52|A0A0K3CL52_RHOTO	0	Y	n7-17c35/36o
tr|A0A2H1GF51|A0A2H1GF51_ZYMTR	1	0	i92-115o
tr|A0A1E3P5V3|A0A1E3P5V3_WICAA	0	0	i
tr|A0A1L9RSZ1|A0A1L9RSZ1_ASPWE	0	Y	n4-15c20/21o
tr|A0AAN6NAR3|A0AAN6NAR3_9PEZI	1	0	i419-443o
tr|A0A8H6B548|A0A8H6B548_9HELO	0	Y	n4-14c22/23o
tr|A0A6A5R6Y6|A0A6A5R6Y6_9PLEO	0	0	i
tr|A0A6A6DK96|A0A6A6DK96_9PEZI	0	Y	n15-26c31/32o
tr|M7TY86|M7TY86_EUTLA	0	Y	n6-14c19/20o
tr|A0A175WH87|A0A175WH87_9PEZI	0	0	i
tr|A0A3P6EUR4|A0A3P6EUR4_BRAOL	5	Y	n7-18c23/24o62-82i94-119o131-150i162-185o200-218i
tr|A0A8H5EZ86|A0A8H5EZ86_9AGAR	0	Y	n4-15c19/20o
tr|A0ABU1RWQ8|A0ABU1RWQ8_9GAMM	0	Y	n18-29c40/41o
tr|A0AAD7AET7|A0AAD7AET7_9AGAR	0	0	i
tr|A8PFT1|A8PFT1_COPC7	0	Y	n3-13c17/18o
tr|A0A066WPY5|A0A066WPY5_TILAU	1	0	i157-178o
tr|A0A8H2XUE8|A0A8H2XUE8_9AGAM	1	Y	n7-17c35/36o552-572i
tr|A0AAN6PF78|A0AAN6PF78_9PEZI	0	Y	n2-12c17/18o
tr|A0A8H6RCE2|A0A8H6RCE2_9PEZI	0	Y	n3-14c19/20o
tr|A0A8H7S585|A0A8H7S585_9FUNG	0	Y	n2-10c18/19o
tr|A0A179IF51|A0A179IF51_CORDF	0	0	i
tr|B0DCM6|B0DCM6_LACBS	1	0	i68-89o
tr|A0A0G2FRD1|A0A0G2FRD1_9PEZI	0	Y	n3-13c17/18o
tr|A0A5N5X9K3|A0A5N5X9K3_9EURO	0	0	i
tr|A0AAV9T4Z1|A0AAV9T4Z1_9PEZI	0	Y	n11-19c24/25o
tr|A0A1Y2BY07|A0A1Y2BY07_9FUNG	1	Y	n3-13c18/19o418-438i
tr|A0AA35M1T5|A0AA35M1T5_9HYPO	0	0	i
tr|G2QMR6|G2QMR6_THET4	1	0	i77-99o
tr|R1GS65|R1GS65_BOTPV	0	0	i
tr|A0A9N9EUZ3|A0A9N9EUZ3_9GLOM	0	0	i
tr|A0A1L9VGF2|A0A1L9VGF2_ASPGL	0	Y	n6-18c23/24o
tr|A0A9P8DAF1|A0A9P8DAF1_9HYPO	0	Y	n4-14c21/22o
tr|A0A5N6UFA7|A0A5N6UFA7_ASPTM	0	0	i
tr|A0A8G1VFX2|A0A8G1VFX2_9EURO	0	0	i
tr|A0A0D1CHC4|A0A0D1CHC4_MYCMD	1	0	i235-256o
tr|A0AAU7C7S6|A0AAU7C7S6_9BACT	0	0	i
tr|A0AAE1C396|A0AAE1C396_9PEZI	0	Y	n7-17c21/22o
tr|A0A165QDQ3|A0A165QDQ3_EXIGL	0	Y	n4-15c21/22o
tr|A0A5C3KPV1|A0A5C3KPV1_COPMA	0	0	i
tr|A0A0N1P0M0|A0A0N1P0M0_9EURO	0	0	i
tr|A0A077B2R1|A0A077B2R1_9FUNG	0	0	i
tr|A0A084G332|A0A084G332_PSEDA	0	0	i
tr|A0A2T4AXA2|A0A2T4AXA2_9HYPO	0	Y	n8-17c22/23o
tr|A0A165PLL2|A0A165PLL2_9APHY	0	Y	n6-17c24/25o
tr|A0A5N5X6C3|A0A5N5X6C3_9EURO	1	Y	n6-19c24/25o661-679i
tr|A0A167PSM9|A0A167PSM9_PHYB8	0	Y	n6-14c19/20o
tr|A0A6A5ZBX0|A0A6A5ZBX0_9PLEO	1	0	i273-294o
tr|A0AAD4HAS9|A0AAD4HAS9_9FUNG	1	Y	n3-12c20/21o564-587i
tr|A0A316ZF97|A0A316ZF97_9BASI	0	Y	n4-15c20/21o
tr|A0A4S4KCU3|A0A4S4KCU3_9APHY	0	Y	n10-21c25/26o
tr|A0A8T8TAE3|A0A8T8TAE3_9BASI	0	0	i
tr|A0A8X7N2Q8|A0A8X7N2Q8_9BASI	0	0	i
tr|A0A9W9IIE1|A0A9W9IIE1_9EURO	0	Y	n2-13c18/19o
tr|A0A1E4RIW0|A0A1E4RIW0_9ASCO	0	0	i
tr|A0A319DRL3|A0A319DRL3_ASPSB	0	Y	n3-11c16/17o
tr|A0AAV5ABR7|A0AAV5ABR7_9AGAM	0	0	i
tr|A0AAD9CWG0|A0AAD9CWG0_PAPLA	0	0	i
tr|A0A430LK77|A0A430LK77_9HYPO	0	Y	n9-20c25/26o
tr|A0A8H3AHD3|A0A8H3AHD3_9AGAM	0	0	i
tr|W9JIW1|W9JIW1_FUSOX	0	Y	n5-16c21/22o
tr|A0AAV5AH02|A0AAV5AH02_9AGAM	0	0	i
tr|A0A2A9NKT9|A0A2A9NKT9_9AGAR	1	0	i158-180o
tr|A0A9P8N0N1|A0A9P8N0N1_9HYPO	1	0	o29-52i
tr|A0A8H5IZN0|A0A8H5IZN0_9HYPO	0	0	i
tr|J3NMZ4|J3NMZ4_GAET3	1	0	i26-47o
tr|J3PI05|J3PI05_GAET3	0	Y	n3-11c18/19o
tr|A0A9N8KCJ0|A0A9N8KCJ0_9PEZI	0	Y	n4-15c20/21o
tr|A0AA39PCV4|A0AA39PCV4_9AGAR	0	Y	n41-51c55/56o
tr|W3VUM0|W3VUM0_MOEAP	10	0	o6-27i198-216o222-239i317-336o356-376i410-432o463-481i486-505o533-555i649-668o
tr|A0A1E3I2J1|A0A1E3I2J1_9TREE	0	0	i
tr|A0A9P6M581|A0A9P6M581_MORAP	0	0	i
tr|A0A409YKU0|A0A409YKU0_9AGAR	0	Y	n2-12c19/20o
tr|A0A6A5QAB5|A0A6A5QAB5_AMPQU	0	Y	n4-15c19/20o
tr|A0A6A6H725|A0A6A6H725_VIRVR	0	Y	n3-14c19/20o
tr|W2RU10|W2RU10_CYPE1	1	0	i70-93o
tr|A0AAW0DC13|A0AAW0DC13_9AGAR	0	Y	n5-16c21/22o
tr|A0A0C2EJY9|A0A0C2EJY9_9PEZI	0	0	i
tr|A0A9W9BWM9|A0A9W9BWM9_9PLEO	0	Y	n3-12c17/18o
tr|A0A0P7BCX4|A0A0P7BCX4_9HYPO	0	Y	n3-11c19/20o
tr|A0AAJ0D1L0|A0AAJ0D1L0_9HYPO	0	Y	n4-14c18/19o
tr|A0A0C3HL43|A0A0C3HL43_OIDMZ	0	0	i
tr|A0A136IM29|A0A136IM29_9PEZI	0	Y	n3-13c18/19o
tr|A0ABQ1B2C1|A0ABQ1B2C1_ASPLE	0	Y	n6-16c21/22o
tr|A0A8K0W4K3|A0A8K0W4K3_9PLEO	0	Y	n3-10c16/17o
tr|N4X993|N4X993_COCH4	0	Y	n3-13c18/19o
tr|A0ABR2ZI79|A0ABR2ZI79_9AGAR	0	Y	n4-11c16/17o
tr|A0A8H6TU76|A0A8H6TU76_MYCCL	1	0	i64-88o
tr|A0A194XBA4|A0A194XBA4_MOLSC	0	Y	n13-24c29/30o
tr|A0AA44WEG2|A0AA44WEG2_VERDA	0	Y	n5-16c21/22o
tr|A0A1B8GTI4|A0A1B8GTI4_9PEZI	0	0	i
tr|A0AAN7B470|A0AAN7B470_9PEZI	0	Y	n8-19c28/29o
tr|J5R4D5|J5R4D5_TRIAS	0	0	i
tr|G8A544|G8A544_FLAVE	0	0	i
tr|A0A2N3NE58|A0A2N3NE58_9PEZI	0	Y	n6-17c21/22o
tr|A0A1X6MUT4|A0A1X6MUT4_9APHY	0	0	i
tr|A0A6A6UQA1|A0A6A6UQA1_9PEZI	0	Y	n7-19c27/28o
tr|A0AA37P8F6|A0AA37P8F6_9PEZI	0	0	i
tr|A0A9N9Y609|A0A9N9Y609_9HYPO	0	0	i
tr|A0A067PN79|A0A067PN79_9AGAM	0	Y	n6-16c24/25o
tr|A0A409VXJ3|A0A409VXJ3_9AGAR	0	Y	n3-14c18/19o
tr|A0A9P5ZEN7|A0A9P5ZEN7_9AGAR	0	Y	n3-14c19/20o
tr|A0A9W8N1A5|A0A9W8N1A5_9AGAR	0	Y	n2-13c18/19o
tr|A0A139HVN2|A0A139HVN2_9PEZI	0	0	i
tr|A0AAF0DGY1|A0AAF0DGY1_9EURO	0	Y	n6-17c25/26o
tr|A0A1L9UB48|A0A1L9UB48_ASPBC	0	Y	n10-22c27/28o
tr|A0A9P7B1E7|A0A9P7B1E7_9HELO	0	Y	n3-14c20/21o
tr|A0A9W9GUJ9|A0A9W9GUJ9_9EURO	0	Y	n3-14c21/22o
tr|A0AAE0TMA6|A0AAE0TMA6_9PEZI	0	Y	n3-11c18/19o
tr|A0A9P5NR02|A0A9P5NR02_GYMJU	0	Y	n4-14c18/19o
tr|A0A8H5BLJ0|A0A8H5BLJ0_9AGAR	1	Y	n31-39c44/45o488-505i
tr|E6ZV39|E6ZV39_SPORE	0	Y	n5-20c25/26o
tr|A0ABR2KEX1|A0ABR2KEX1_9EUKA	2	0	o411-429i482-499o
tr|H9C4A2|H9C4A2_COPCM	0	Y	n4-15c21/22o
tr|A0AAE0IVH2|A0AAE0IVH2_9PEZI	0	Y	n4-15c20/21o
tr|A0A4Q4TZF9|A0A4Q4TZF9_9PEZI	0	Y	n4-15c22/23o
tr|A0AAN7ZZ45|A0AAN7ZZ45_9PEZI	0	Y	n7-14c18/19o
tr|A0A1V8TUS4|A0A1V8TUS4_9PEZI	0	Y	n7-18c24/25o
tr|A0AAJ0MR01|A0AAJ0MR01_9PEZI	0	Y	n4-15c21/22o
tr|A0A165K9Z2|A0A165K9Z2_EXIGL	0	Y	n5-15c20/21o
tr|A0A5C3QTM3|A0A5C3QTM3_9AGAR	0	Y	n24-33c38/39o
tr|A0A0C3P3V6|A0A0C3P3V6_PHLG1	0	0	i
tr|A0A433QJB9|A0A433QJB9_9FUNG	0	Y	n5-14c19/20o
tr|A0A9P4SH91|A0A9P4SH91_9PEZI	0	Y	n5-13c18/19o
tr|A0A5N6GS73|A0A5N6GS73_ASPFL	0	0	i
tr|A0A6A5S0H5|A0A6A5S0H5_9PLEO	0	Y	n4-15c20/21o
tr|A0A9P8HWR9|A0A9P8HWR9_9PEZI	0	Y	n30-44c49/50o
tr|A0A8H8P2H2|A0A8H8P2H2_9AGAM	0	Y	n4-12c17/18o
tr|A0ABT6WWR0|A0ABT6WWR0_9ACTN	0	0	i
tr|C1H1A1|C1H1A1_PARBA	1	0	i43-66o
tr|A0A1P8SRK5|A0A1P8SRK5_AURAJ	0	Y	n2-11c15/16o
tr|A0A9P7V167|A0A9P7V167_9AGAR	0	Y	n3-14c21/22o
tr|A0A0C9UZR1|A0A0C9UZR1_9AGAM	0	0	i
tr|A0A5B0MDX3|A0A5B0MDX3_PUCGR	0	0	i
tr|B0DGU6|B0DGU6_LACBS	0	Y	n3-13c18/19o
tr|A0A165CDF7|A0A165CDF7_9BASI	0	Y	n8-15c20/21o
tr|A0AAD5JQW6|A0AAD5JQW6_9FUNG	0	Y	n3-14c22/23o
tr|A0A9W9PKH2|A0A9W9PKH2_9EURO	0	Y	n3-14c19/20o
tr|A0A2J5IAE4|A0A2J5IAE4_9EURO	2	0	o948-968i1007-1028o
tr|A0A2B7XVV2|A0A2B7XVV2_POLH7	0	Y	n6-17c22/23o
tr|A0ABT3D097|A0ABT3D097_9BACT	0	0	i
tr|A0AAJ4XMS8|A0AAJ4XMS8_9BASI	0	Y	n7-18c23/24o
tr|A0A2I1CC37|A0A2I1CC37_ASPN1	0	Y	n2-13c18/19o
tr|A0A0C9W4N5|A0A0C9W4N5_9AGAM	0	Y	n6-17c24/25o
tr|A0A6P8AQQ4|A0A6P8AQQ4_PYRGI	0	Y	n5-15c19/20o
tr|A0A0C9UCI4|A0A0C9UCI4_SPHS4	0	0	i
tr|A0A3E2GVR3|A0A3E2GVR3_SCYLI	0	Y	n5-16c22/23o
tr|A0A074YI92|A0A074YI92_AURSE	0	0	i
tr|A0A1L9R5E4|A0A1L9R5E4_ASPWE	0	0	i
tr|A0A117NL29|A0A117NL29_PENFR	0	0	i
tr|A0A8B7Y0J6|A0A8B7Y0J6_ACAPL	1	0	o49-66i
tr|A0A8H4RHP5|A0A8H4RHP5_9HELO	0	0	i
tr|A0A8H3ZPP7|A0A8H3ZPP7_9PEZI	0	Y	n5-15c20/21o
tr|A0A093VC52|A0A093VC52_TALMA	1	0	o723-739i
tr|A0A9P5UXN2|A0A9P5UXN2_9FUNG	1	0	i20-39o
tr|A0A168K7J6|A0A168K7J6_CORDF	0	0	i
tr|A0A9P4VNC5|A0A9P4VNC5_9PEZI	0	Y	n3-13c18/19o
tr|G2R097|G2R097_THETT	0	0	i
tr|A0AAW0CVW9|A0AAW0CVW9_9AGAR	1	0	i109-133o
tr|A0A550CZY7|A0A550CZY7_9AGAR	0	Y	n14-25c29/30o
tr|A0AAD7XAQ3|A0AAD7XAQ3_9APHY	0	0	i
tr|A0A2N3MZA2|A0A2N3MZA2_9PEZI	0	0	i
tr|A0A9P4NYG8|A0A9P4NYG8_9PEZI	0	Y	n2-12c17/18o
tr|A0AAN6DSN1|A0AAN6DSN1_9EURO	0	0	i
tr|A0A4S9UKJ9|A0A4S9UKJ9_AURPU	0	Y	n3-14c19/20o
tr|A0A550C123|A0A550C123_9AGAR	0	Y	n6-17c22/23o
tr|A0A9P9EA79|A0A9P9EA79_9PLEO	0	0	i
tr|A0AAD7KBQ6|A0AAD7KBQ6_9AGAR	0	0	i
tr|A0A2D3ULU7|A0A2D3ULU7_9PEZI	0	Y	n3-14c18/19o
tr|A0A0C9WDY0|A0A0C9WDY0_9AGAM	0	0	i
tr|A0AA39JG08|A0AA39JG08_9AGAR	0	Y	n3-12c17/18o
tr|A0A8H6TL32|A0A8H6TL32_MYCCL	0	0	i
tr|E3QZF6|E3QZF6_COLGM	0	Y	n6-14c19/20o
tr|A0AA39U8S4|A0AA39U8S4_ARMTA	0	Y	n9-17c22/23o
tr|A0A9W8G920|A0A9W8G920_9FUNG	0	0	i
tr|A0A443HJY3|A0A443HJY3_BYSSP	0	Y	n3-14c18/19o
tr|A0A9Q9EQY7|A0A9Q9EQY7_9PEZI	0	0	i
tr|A0A1R3S0N9|A0A1R3S0N9_ASPC5	0	Y	n3-14c19/20o
tr|A0A177D2F0|A0A177D2F0_ALTAL	0	Y	n5-12c17/18o
tr|A0A8H7XR89|A0A8H7XR89_PSICU	0	Y	n9-16c21/22o
tr|A0A8H3CS52|A0A8H3CS52_9AGAM	0	Y	n3-13c18/19o
tr|A0A1Y2E242|A0A1Y2E242_9FUNG	1	Y	n3-14c20/21o446-464i
tr|A0AAN9U6G2|A0AAN9U6G2_9PEZI	0	Y	n6-15c20/21o
tr|A0A067Q3E3|A0A067Q3E3_9AGAM	1	0	i160-182o
tr|A0A1X2G7C2|A0A1X2G7C2_9FUNG	0	0	i
tr|S8ANS0|S8ANS0_DACHA	0	0	i
tr|A0AAD9SM11|A0AAD9SM11_PHOAM	0	Y	n4-15c22/23o
tr|A0A6A4INF6|A0A6A4INF6_9AGAR	0	0	i
tr|A0A106BZH3|A0A106BZH3_SHEFR	0	0	i
tr|A0A8H3GT29|A0A8H3GT29_9AGAM	0	Y	n3-14c19/20o
tr|A0A5K1JUA5|A0A5K1JUA5_9APHY	1	0	o691-709i
tr|A0A286U966|A0A286U966_9AGAM	1	0	i38-58o
tr|A0AAV0B849|A0AAV0B849_PHAPC	1	0	i129-152o
tr|A0A077WR53|A0A077WR53_9FUNG	0	0	i
tr|A0A507AMM5|A0A507AMM5_9PEZI	0	0	i
tr|A0A8H3AMN4|A0A8H3AMN4_9AGAM	0	0	i
tr|A0A9P8EC04|A0A9P8EC04_AURME	0	Y	n3-13c20/21o
tr|A0A084QID1|A0A084QID1_STAC4	0	Y	n6-17c22/23o
tr|A0A9P4IBA9|A0A9P4IBA9_9PEZI	0	0	i
tr|A0A067M0B2|A0A067M0B2_BOTB1	0	Y	n3-13c18/19o
tr|A0A8H7BVV5|A0A8H7BVV5_9FUNG	1	0	o481-504i
tr|A0A8H7I1G5|A0A8H7I1G5_9AGAM	7	0	o511-528i573-598o618-638i729-748o1235-1254i1266-1288o1294-1315i
tr|A0A4S8LR47|A0A4S8LR47_DENBC	0	Y	n6-14c22/23o
tr|A0A8H7BWU5|A0A8H7BWU5_9FUNG	1	0	i52-74o
tr|A0A6A6GEU6|A0A6A6GEU6_9PEZI	1	0	i237-258o
tr|A0AAF0Y0A8|A0AAF0Y0A8_9TREE	1	0	i165-183o
tr|D8PUK9|D8PUK9_SCHCM	0	Y	n4-12c17/18o
tr|A0AAW0EEG7|A0AAW0EEG7_9AGAR	0	0	i
tr|A0A4P7NS79|A0A4P7NS79_PYROR	0	Y	n3-14c19/20o
tr|A0A8I3A046|A0A8I3A046_VERLO	0	Y	n5-15c20/21o
tr|A0A177CWX2|A0A177CWX2_9PLEO	0	0	i
tr|A0A173GNA1|A0A173GNA1_9HYPO	1	0	i171-193o
tr|A0A8S8ZWF0|A0A8S8ZWF0_SORMA	1	0	i380-401o
tr|A0AAD7ILZ0|A0AAD7ILZ0_9AGAR	0	Y	n5-13c17/18o
tr|A0A6S6VT13|A0A6S6VT13_9PLEO	0	Y	n2-10c15/16o
tr|A0A8A1M3I6|A0A8A1M3I6_AJECA	1	0	o45-69i
tr|A0A168A8D8|A0A168A8D8_9HYPO	0	Y	n6-14c19/20o
tr|A0A409VIY4|A0A409VIY4_9AGAR	0	Y	n4-14c19/20o
tr|C7ZM57|C7ZM57_FUSV7	0	0	i
tr|A0A395T8K7|A0A395T8K7_9HYPO	0	Y	n4-15c20/21o
tr|A0A1V6V0U9|A0A1V6V0U9_9EURO	0	Y	n4-15c19/20o
tr|A0A9P8L2R2|A0A9P8L2R2_9PEZI	0	0	i
tr|A0A1E3PZU1|A0A1E3PZU1_LIPST	0	Y	n3-14c19/20o
tr|A0A8T9C4W2|A0A8T9C4W2_9HELO	0	Y	n4-11c16/17o
tr|A0A8H6JX71|A0A8H6JX71_9PEZI	0	Y	n6-16c21/22o
tr|A0A2M7S9Z5|A0A2M7S9Z5_9BACT	0	0	i
tr|Q9HG17|Q9HG17_GANLU	0	Y	n6-16c21/22o
tr|A0A9P5HEN4|A0A9P5HEN4_9HYPO	0	Y	n6-16c20/21o
tr|A0A8H6MBP5|A0A8H6MBP5_9AGAR	0	0	i
tr|A0A1J8PQ85|A0A1J8PQ85_9AGAM	0	0	i
tr|A0A3S3V5U8|A0A3S3V5U8_9RHOB	7	0	o6-23i30-51o57-79i91-109o115-136i148-165o177-201i
tr|Q0V525|Q0V525_PHANO	0	Y	n3-13c18/19o
tr|A0A8H4GKZ5|A0A8H4GKZ5_9EURO	11	0	o982-1003i1015-1032o1038-1055i1075-1096o1102-1125i1162-1185o1197-1216i1228-1247o1253-1275i1287-1311o1317-1336i
tr|A0A1Y1VCM4|A0A1Y1VCM4_9FUNG	0	Y	n6-15c19/20o
tr|A0A194WZ37|A0A194WZ37_MOLSC	0	Y	n3-14c19/20o
tr|A0A9P6NHS0|A0A9P6NHS0_9BASI	0	Y	n2-13c18/19o
tr|A0A3M7GCR4|A0A3M7GCR4_HORWE	0	0	i
tr|A0AAW0GK78|A0AAW0GK78_9APHY	0	0	i
tr|A0AAN6ZKD4|A0AAN6ZKD4_9PEZI	0	Y	n3-14c21/22o
tr|A0ABR3TXK7|A0ABR3TXK7_9PEZI	0	0	i
tr|A0A9W9VE47|A0A9W9VE47_9EURO	0	Y	n6-17c26/27o
tr|A0A1Y1VXS3|A0A1Y1VXS3_9FUNG	0	0	i
tr|W7EVT2|W7EVT2_BIPV3	0	Y	n3-14c19/20o
tr|A0A179U9J7|A0A179U9J7_BLAGS	0	0	i
tr|A0ABT0GHT5|A0ABT0GHT5_9GAMM	0	0	i
tr|A0A1X2HIA3|A0A1X2HIA3_SYNRA	0	Y	n4-15c23/24o
tr|A0A2T5M1T5|A0A2T5M1T5_9EURO	0	0	i
tr|D5GCT2|D5GCT2_TUBMM	0	0	i
tr|W9XHW4|W9XHW4_9EURO	0	0	i
tr|A0A5B0Q6J3|A0A5B0Q6J3_PUCGR	0	0	i
tr|A0AAD6V4Z0|A0AAD6V4Z0_9AGAR	0	Y	n3-14c19/20o
tr|A0A4S8LFV8|A0A4S8LFV8_DENBC	0	Y	n4-15c19/20o
tr|A0A395S420|A0A395S420_FUSSP	0	0	i
tr|A0A8H3HD08|A0A8H3HD08_9AGAM	0	Y	n2-12c17/18o
tr|A0A135LK17|A0A135LK17_PENPA	0	0	i
tr|A0A6A6DNI9|A0A6A6DNI9_9PEZI	0	0	i
tr|A0A8H6P084|A0A8H6P084_9EURO	0	0	i
tr|A0A2K1QPM1|A0A2K1QPM1_9PEZI	0	0	i
tr|A0A5C3QDY3|A0A5C3QDY3_9AGAR	0	0	i
tr|A0A251VC64|A0A251VC64_HELAN	0	0	i
tr|A0AAD6TFX3|A0AAD6TFX3_9AGAR	1	0	i24-46o
tr|A0A9P5S150|A0A9P5S150_9FUNG	0	0	i
tr|A0A2P5I4C8|A0A2P5I4C8_DIAHE	0	Y	n7-18c23/24o
tr|A0AAD7MJG7|A0AAD7MJG7_9AGAR	0	Y	n6-14c18/19o
tr|A0A370PJ40|A0A370PJ40_ASPPH	7	0	o12-32i44-65o85-108i120-141o174-194i206-226o246-268i
tr|A0A1Y2IV35|A0A1Y2IV35_TRAC3	0	0	i
tr|A0AAD6YTY4|A0AAD6YTY4_9AGAR	0	Y	n2-13c17/18o
tr|A0A8H3BVT3|A0A8H3BVT3_9AGAM	0	0	i
tr|A0A2S5B5D4|A0A2S5B5D4_9BASI	0	Y	n2-10c15/16o
tr|J0LDF8|J0LDF8_AURST	0	Y	n9-19c23/24o
tr|A0A2S4UFM1|A0A2S4UFM1_9BASI	0	Y	n10-21c29/30o
tr|A0A365MYD2|A0A365MYD2_GIBIN	0	Y	n7-17c21/22o
tr|A0A8H5Z692|A0A8H5Z692_COCSA	0	Y	n8-19c26/27o
tr|A0A8H5YHP3|A0A8H5YHP3_9HYPO	0	Y	n5-16c21/22o
tr|A0A1L9Q067|A0A1L9Q067_ASPVE	0	0	i
tr|A0A316V4J7|A0A316V4J7_9BASI	0	0	i
tr|A0A409YVS3|A0A409YVS3_9AGAR	1	0	i91-115o
tr|A0A8H8UVQ6|A0A8H8UVQ6_ORBOL	0	0	i
tr|A0A8H7UUR2|A0A8H7UUR2_9FUNG	0	0	i
tr|A0A9P9DY62|A0A9P9DY62_9PLEO	1	0	i306-327o
tr|A0ABR0REC6|A0ABR0REC6_9EURO	0	Y	n6-17c25/26o
tr|A0A364MXA0|A0A364MXA0_STELY	0	0	i
tr|A0A8H5R3D2|A0A8H5R3D2_9HYPO	0	Y	n5-13c18/19o
tr|A0A9W9VJ74|A0A9W9VJ74_9EURO	0	Y	n3-14c20/21o
tr|A0A1Y2EH54|A0A1Y2EH54_9PEZI	0	Y	n3-13c18/19o
tr|M5C6Y9|M5C6Y9_THACB	0	Y	n2-12c17/18o
tr|A0A1W5D9K7|A0A1W5D9K7_9LECA	5	0	o71-91i103-124o136-155i176-196o202-223i
tr|A0ABR4BR59|A0ABR4BR59_9LECA	1	0	i277-296o
tr|A0AAJ0I3J6|A0AAJ0I3J6_9PEZI	1	Y	n3-14c22/23o1023-1043i
tr|A0A8H5YWR2|A0A8H5YWR2_9HYPO	0	0	i
tr|A0A4S8MAB0|A0A4S8MAB0_DENBC	0	0	i
tr|A0A177CY10|A0A177CY10_9PLEO	0	Y	n6-16c21/22o
tr|A0A9W4RTC6|A0A9W4RTC6_9PEZI	0	0	i
tr|A0A074YQ85|A0A074YQ85_AURSE	0	Y	n9-20c29/30o
tr|A0A433DLQ6|A0A433DLQ6_9FUNG	0	0	i
tr|A0A0G4KUM9|A0A0G4KUM9_VERLO	12	0	i407-429o441-460i481-504o516-536i543-561o581-605i617-643o675-697i709-727o739-762i783-806o818-837i
tr|A0AAV5GM39|A0AAV5GM39_9BASI	0	Y	n6-17c25/26o
tr|A0A1R0H933|A0A1R0H933_9FUNG	0	Y	n8-20c24/25o
tr|A0AAE0PAI5|A0AAE0PAI5_SORBR	4	0	i91-111o156-175i195-216o1228-1248i
tr|A0A409YBQ8|A0A409YBQ8_9AGAR	0	Y	n3-14c19/20o
tr|A0AAV5A084|A0AAV5A084_9AGAM	0	Y	n10-20c25/26o
tr|A0A8H3ITV9|A0A8H3ITV9_9LECA	0	0	i
tr|A0A3N4IGX0|A0A3N4IGX0_ASCIM	0	Y	n4-12c17/18o
tr|A0A6A6U3R4|A0A6A6U3R4_9PEZI	0	0	i
tr|D4DC57|D4DC57_TRIVH	0	Y	n6-17c22/23o
tr|A0A8H3DTL8|A0A8H3DTL8_9AGAM	0	0	i
tr|A0A9N8KMB0|A0A9N8KMB0_9PEZI	0	Y	n3-12c17/18o
tr|A0A3N4IKX9|A0A3N4IKX9_ASCIM	0	0	i
tr|A0A1C7NBZ2|A0A1C7NBZ2_9FUNG	0	0	i
tr|A0A1B5L4U7|A0A1B5L4U7_USTVR	0	0	i
tr|A0A0C3AW72|A0A0C3AW72_SERVB	0	Y	n4-15c20/21o
tr|A0AA40CEV9|A0AA40CEV9_9PEZI	0	0	i
tr|W9XKW1|W9XKW1_9EURO	0	0	i
tr|A0AAW0CEF3|A0AAW0CEF3_9AGAR	0	Y	n4-15c19/20o
tr|A0A8H3E5U4|A0A8H3E5U4_9AGAM	0	0	i
tr|A0AAN6MAL1|A0AAN6MAL1_9PEZI	0	Y	n5-15c27/28o
tr|E9E6K4|E9E6K4_METAQ	0	0	i
tr|A0AA97NST2|A0AA97NST2_PYRO3	0	Y	n2-13c18/19o
tr|A0A8H6V211|A0A8H6V211_9EURO	0	0	i
tr|A0A4V4HHK3|A0A4V4HHK3_DENBC	1	0	i12-30o
tr|A0A6A5S1C8|A0A6A5S1C8_9PLEO	0	Y	n4-12c17/18o
tr|A0A8C6NQY8|A0A8C6NQY8_NOTFU	1	Y	n13-24c33/34o769-792i
tr|R0JR27|R0JR27_EXST2	1	0	i167-190o
tr|A0A4Y9ZR12|A0A4Y9ZR12_9AGAM	0	Y	n5-16c21/22o
tr|A0A8E2JNK3|A0A8E2JNK3_9PEZI	0	Y	n2-13c21/22o
tr|A0A5B0PHU0|A0A5B0PHU0_PUCGR	0	Y	n8-19c24/25o
tr|A0A4Q4MRC8|A0A4Q4MRC8_9PLEO	0	Y	n2-12c17/18o
tr|A0AA39YLU2|A0AA39YLU2_9PEZI	0	Y	n4-15c20/21o
tr|S3DG29|S3DG29_GLAL2	1	0	i139-160o
tr|A0A5N6F5A4|A0A5N6F5A4_9EURO	0	Y	n8-16c22/23o
tr|Q2GM35|Q2GM35_CHAGB	0	Y	n3-14c19/20o
tr|A0A0P7AYZ0|A0A0P7AYZ0_9HYPO	0	0	i
tr|A0A0C3QJS3|A0A0C3QJS3_9AGAM	0	0	i
tr|W3VMN8|W3VMN8_MOEAP	0	Y	n4-15c20/21o
tr|A0A8H2WSW8|A0A8H2WSW8_9AGAM	0	Y	n6-16c21/22o
tr|A0A0C9Z7X3|A0A0C9Z7X3_9AGAM	0	Y	n3-14c22/23o
tr|A0A0D6ZYX7|A0A0D6ZYX7_9AGAR	0	Y	n11-22c27/28o
tr|A0ABN7UKP3|A0ABN7UKP3_GIGMA	1	0	i44-63o
tr|A0A074X0R3|A0A074X0R3_9PEZI	0	0	i
tr|A0A4U0UES5|A0A4U0UES5_9PEZI	0	Y	n11-22c26/27o
tr|A0A8H7PTA8|A0A8H7PTA8_MORIS	0	Y	n5-16c20/21o
tr|A0A376Y294|A0A376Y294_ECOLX	1	0	o15-33i
tr|A0A8K0R406|A0A8K0R406_9PLEO	0	Y	n4-14c18/19o
tr|A0AAW0CKZ4|A0AAW0CKZ4_9AGAR	0	Y	n9-17c21/22o
tr|A0A1E3K7Z6|A0A1E3K7Z6_9TREE	0	0	i
tr|A0A7S1SRD2|A0A7S1SRD2_9CHLO	0	0	i
tr|A0A9P5Z4T8|A0A9P5Z4T8_9AGAR	0	Y	n4-16c21/22o
tr|A0AAE0JGR8|A0AAE0JGR8_9PEZI	0	Y	n7-14c19/20o
tr|A0A063C6E8|A0A063C6E8_USTVR	0	Y	n2-12c17/18o
tr|A0A8H5GSH6|A0A8H5GSH6_9AGAR	0	Y	n2-13c17/18o
tr|A0A699ZD47|A0A699ZD47_HAELA	0	0	i
tr|A0A9W9LMM9|A0A9W9LMM9_9EURO	0	0	i
tr|A0A9P4VQN8|A0A9P4VQN8_9PEZI	0	0	i
tr|A0AAX6MRS7|A0AAX6MRS7_9PEZI	0	0	i
tr|A0A9P8VUN4|A0A9P8VUN4_9HYPO	0	0	i
tr|A0A8H4VV95|A0A8H4VV95_9AGAR	0	Y	n14-25c30/31o
tr|A0A9P5CD90|A0A9P5CD90_9HYPO	0	0	i
tr|G4TX03|G4TX03_SERID	1	0	i107-132o
tr|A0A0L1IU78|A0A0L1IU78_ASPN3	0	Y	n4-12c17/18o
tr|A0AAN6GVK0|A0AAN6GVK0_9BASI	0	Y	n3-13c17/18o
tr|A0A8H7N6J5|A0A8H7N6J5_BIOOC	0	Y	n4-14c19/20o
tr|A0A9P4N561|A0A9P4N561_9PLEO	0	0	i
tr|A0AA38HDI1|A0AA38HDI1_9TREE	0	0	i
tr|A0A9W8R790|A0A9W8R790_9HYPO	0	Y	n4-15c19/20o
tr|K0KJR5|K0KJR5_WICCF	0	Y	n4-14c18/19o
tr|A8Q7J7|A8Q7J7_MALGO	1	0	i12-31o
tr|A0AAN6SM68|A0AAN6SM68_9PEZI	0	Y	n3-14c19/20o
tr|A0A9P6CWH4|A0A9P6CWH4_9AGAR	0	0	i
tr|A0A0F4GB63|A0A0F4GB63_9PEZI	0	Y	n8-17c22/23o
tr|A0AAD4I7A4|A0AAD4I7A4_9PLEO	0	Y	n3-13c18/19o
tr|A0A369J9U3|A0A369J9U3_HYPMA	0	Y	n3-14c19/20o
tr|A0A1M8AAW8|A0A1M8AAW8_MALS4	0	Y	n4-15c22/23o
tr|A0A9P7NAR2|A0A9P7NAR2_9HYPO	1	0	o363-390i
tr|A0A8K0SUM4|A0A8K0SUM4_9HYPO	0	0	i
tr|A0A9P4UFA0|A0A9P4UFA0_9PLEO	0	Y	n3-13c23/24o
tr|A0A165MKU7|A0A165MKU7_EXIGL	0	Y	n7-15c20/21o
tr|E4ZG37|E4ZG37_LEPMJ	0	0	i
tr|A0A5C3LM39|A0A5C3LM39_9AGAR	1	0	i88-105o
tr|A0A084G701|A0A084G701_PSEDA	0	Y	n3-15c20/21o
tr|A0A932GM30|A0A932GM30_UNCTE	0	0	i
tr|A0A8H6YBY8|A0A8H6YBY8_9AGAR	0	0	i
tr|A0A067SRJ3|A0A067SRJ3_GALM3	0	0	i
tr|A0A8K0NGK8|A0A8K0NGK8_9HYPO	0	0	i
sp|B0XNL6|AGDC_ASPFC	0	Y	n4-14c19/20o
tr|A0A9P3UT10|A0A9P3UT10_LYOSH	0	0	i
tr|A0A8H6RC02|A0A8H6RC02_9PEZI	0	Y	n5-12c17/18o
tr|A0AA40CYD4|A0AA40CYD4_9PEZI	0	Y	n3-14c21/22o
tr|A0A8T9B8A3|A0A8T9B8A3_9HELO	0	Y	n6-13c18/19o
tr|A0A1Y2A9P4|A0A1Y2A9P4_9PLEO	0	Y	n7-15c21/22o
tr|A0A165CRV7|A0A165CRV7_9BASI	0	0	i
tr|A0A136JBN6|A0A136JBN6_9PEZI	0	0	i
tr|S7ZW00|S7ZW00_PENO1	0	Y	n10-21c27/28o
tr|A0AAN8RD32|A0AAN8RD32_9PEZI	0	Y	n3-13c18/19o
tr|A0A8H6P9X1|A0A8H6P9X1_9EURO	0	Y	n12-20c25/26o
tr|A0A0D0B416|A0A0D0B416_9AGAM	0	0	i
tr|A0A8H4U0C8|A0A8H4U0C8_9HYPO	0	0	i
tr|A0ABR0IKA6|A0ABR0IKA6_9PEZI	0	0	i
tr|A0A4C9HA91|A0A4C9HA91_ECOLX	0	0	i
tr|A0A167T9H6|A0A167T9H6_9HYPO	1	0	i86-108o
tr|A0A8H4CE85|A0A8H4CE85_COLGL	1	0	i353-376o
tr|A0AAE0IY79|A0AAE0IY79_9PEZI	0	Y	n10-18c23/24o
tr|A0A0D7AKB6|A0A0D7AKB6_9AGAR	1	0	i55-79o
tr|A0A317SPW0|A0A317SPW0_9PEZI	0	0	i
tr|A0A2I2G3C8|A0A2I2G3C8_9EURO	0	Y	n3-12c17/18o
tr|A0AAD4MDP6|A0AAD4MDP6_9AGAM	0	0	i
tr|A0A2P4ZRG7|A0A2P4ZRG7_9HYPO	0	Y	n8-19c27/28o
sp|A1CTI3|EXGD_ASPCL	1	0	i301-322o
tr|A0A8H5A0E2|A0A8H5A0E2_9HYPO	0	Y	n4-14c21/22o
tr|A0AAJ0MER4|A0AAJ0MER4_9PEZI	0	0	i
tr|H2B658|H2B658_THETO	0	Y	n4-11c16/17o
tr|A0A2S1TZA6|A0A2S1TZA6_9FUNG	1	0	i29-54o
tr|A0A8H6KRF3|A0A8H6KRF3_9PEZI	0	Y	n2-13c18/19o
tr|A0A1L7V8V9|A0A1L7V8V9_FUSPR	0	0	i
tr|A0A8H5N0X8|A0A8H5N0X8_9HYPO	0	0	i
tr|A0A633MDQ9|A0A633MDQ9_SALER	0	0	i
tr|A0A3N4KEU5|A0A3N4KEU5_9PEZI	0	Y	n4-11c16/17o
tr|A0A9P6H6Z2|A0A9P6H6Z2_9AGAM	0	Y	n4-14c20/21o
tr|A0AAE0N0H0|A0AAE0N0H0_9PEZI	0	0	i
tr|A0A0L6V1H3|A0A0L6V1H3_9BASI	1	0	i20-37o
tr|A0AA40BJP2|A0AA40BJP2_9PEZI	1	Y	n7-17c22/23o391-408i
tr|A0ABR3A2Z9|A0ABR3A2Z9_9AGAR	1	0	i139-162o
tr|A0A8H3PGJ3|A0A8H3PGJ3_9LECA	1	0	i161-183o
tr|A0A0J9XD54|A0A0J9XD54_GEOCN	0	0	i
tr|A0A4Y9YD59|A0A4Y9YD59_9AGAM	1	0	i73-91o
tr|F9XFN8|F9XFN8_ZYMTI	0	Y	n3-14c18/19o
tr|A0A5B0NER6|A0A5B0NER6_PUCGR	0	Y	n5-16c21/22o
tr|A0A8H7P1J9|A0A8H7P1J9_9APHY	0	Y	n2-12c17/18o
tr|A0A162JRM3|A0A162JRM3_CORDF	1	0	o33-55i
tr|A0A316YKR6|A0A316YKR6_9BASI	0	Y	n7-15c19/20o
tr|A0A9Q5HZH8|A0A9Q5HZH8_SANBA	0	0	i
tr|A0A395T9X0|A0A395T9X0_9HYPO	0	0	i
tr|A0A1Y1XBU9|A0A1Y1XBU9_9FUNG	0	Y	n3-14c19/20o
tr|D6RMY9|D6RMY9_COPC7	0	0	i
tr|K9GKL5|K9GKL5_PEND1	0	Y	n3-13c18/19o
tr|A0A2H3CA96|A0A2H3CA96_9AGAR	1	0	i96-118o
tr|A0A0F4ZGG3|A0A0F4ZGG3_9PEZI	0	Y	n4-15c20/21o
tr|A0A0U1LK96|A0A0U1LK96_TALIS	0	0	i
tr|A0A3R7LW99|A0A3R7LW99_9EURO	1	Y	n3-13c18/19o419-439i
tr|A0A5N6T294|A0A5N6T294_ASPPS	0	0	i
tr|A0A1V6QMP9|A0A1V6QMP9_9EURO	0	Y	n4-16c24/25o
tr|A0A319B1C1|A0A319B1C1_ASPVC	0	0	i
tr|A0A9W9P396|A0A9W9P396_PENCI	0	Y	n7-15c20/21o
tr|A0A9P9JII5|A0A9P9JII5_9HYPO	1	0	i167-188o
tr|A0AAN7YZQ1|A0AAN7YZQ1_9PEZI	0	Y	n3-14c19/20o
tr|A0A9P4TPS0|A0A9P4TPS0_CURKU	0	Y	n4-11c16/17o
tr|A0A4Y7Q912|A0A4Y7Q912_9AGAM	0	Y	n5-15c20/21o
tr|R9AF64|R9AF64_WALI9	0	0	i
tr|A0A167PPC2|A0A167PPC2_PENCH	0	0	i
tr|A0A395IGT9|A0A395IGT9_ASPHC	1	0	i229-250o
tr|A0A545W0Z3|A0A545W0Z3_9HYPO	0	0	i
tr|A0A8T9B5Y3|A0A8T9B5Y3_9HELO	0	Y	n6-13c18/19o
tr|A0A8H8CZ62|A0A8H8CZ62_AJECA	0	0	i
tr|A0AA40CKQ3|A0AA40CKQ3_9PEZI	0	0	i
tr|A0A8H3G366|A0A8H3G366_9LECA	0	0	i
tr|A0A175W9J3|A0A175W9J3_9PEZI	0	Y	n3-13c18/19o
tr|A0A6A6RJF8|A0A6A6RJF8_9PLEO	0	0	i
tr|A0A286UD71|A0A286UD71_9AGAM	0	Y	n7-18c25/26o
tr|A0A6A5QVP6|A0A6A5QVP6_AMPQU	0	Y	n4-14c18/19o
tr|A0A9P6M208|A0A9P6M208_9FUNG	0	0	i
tr|A0AAN7CQM6|A0AAN7CQM6_9PEZI	0	0	i
tr|A0A168EQG2|A0A168EQG2_9HYPO	0	Y	n11-22c28/29o
tr|A0A8H4NJ99|A0A8H4NJ99_9HYPO	0	0	i
tr|A0A2S5B7J5|A0A2S5B7J5_9BASI	1	0	i236-257o
tr|A0A420YBM4|A0A420YBM4_9PEZI	0	Y	n3-14c22/23o
tr|A0A0D1ZMR6|A0A0D1ZMR6_EXOME	1	0	i25-47o
tr|Q2HB91|Q2HB91_CHAGB	0	Y	n10-18c23/24o
tr|A0A2T2ZZL9|A0A2T2ZZL9_9PEZI	0	Y	n12-23c27/28o
tr|E4ZLD2|E4ZLD2_LEPMJ	0	Y	n5-12c17/18o
tr|A0ABY0G484|A0ABY0G484_9PLEO	0	0	i
tr|A0A2T2ZZJ7|A0A2T2ZZJ7_9PEZI	1	0	i76-99o
tr|A0A9P6ECF7|A0A9P6ECF7_9AGAR	0	Y	n4-14c19/20o
tr|A0A8H3DJR9|A0A8H3DJR9_9AGAM	0	Y	n4-14c19/20o
tr|B8M6W5|B8M6W5_TALSN	0	0	i
tr|A0A9P1GWG5|A0A9P1GWG5_9PEZI	1	0	i55-75o
tr|A0ABY0GE98|A0ABY0GE98_9PLEO	0	Y	n6-17c22/23o
tr|A0A427YKI3|A0A427YKI3_9TREE	0	0	i
tr|A0A6A7AI83|A0A6A7AI83_9PLEO	0	Y	n4-12c17/18o
tr|A0A5N5QQK7|A0A5N5QQK7_9AGAM	0	0	i
tr|A0A1Y1WVF4|A0A1Y1WVF4_9FUNG	0	Y	n3-14c19/20o
tr|A0A5C3EX80|A0A5C3EX80_9BASI	0	Y	n6-17c21/22o
tr|A0AAD4EPP5|A0AAD4EPP5_9PEZI	0	Y	n3-10c15/16o
tr|K5X8K9|K5X8K9_AGABU	0	Y	n9-20c25/26o
tr|A0A8H5LRQ6|A0A8H5LRQ6_9AGAR	0	Y	n5-15c20/21o
tr|A0A6G1LNJ6|A0A6G1LNJ6_9PEZI	0	0	i
tr|A0A3M7H1X9|A0A3M7H1X9_HORWE	0	0	i
tr|A0A9N8P8Q4|A0A9N8P8Q4_9PEZI	0	Y	n3-13c20/21o
tr|A0A6A6SJQ9|A0A6A6SJQ9_9PLEO	0	Y	n12-23c28/29o
tr|S9VWD5|S9VWD5_SCHCR	0	0	i
tr|F2YCB6|F2YCB6_9FUNG	0	0	i
tr|A0A6V8QKA4|A0A6V8QKA4_TRIAP	1	0	o329-351i
tr|A0A2S6IWH2|A0A2S6IWH2_9ACTN	0	0	i
tr|A0AAN8N8M6|A0AAN8N8M6_9PEZI	0	Y	n6-14c19/20o
tr|A0A0C3QGI0|A0A0C3QGI0_9AGAM	0	Y	n4-14c19/20o
tr|A0A9W8DU43|A0A9W8DU43_9FUNG	0	Y	n3-14c18/19o
tr|A0A162NXE8|A0A162NXE8_9PEZI	0	Y	n3-11c16/17o
tr|A0A9P7GQB3|A0A9P7GQB3_9AGAR	0	Y	n3-13c18/19o
tr|A0A5N7B3K0|A0A5N7B3K0_9EURO	0	Y	n6-13c18/19o
tr|A0A8H4PDK4|A0A8H4PDK4_9HYPO	0	0	i
tr|A0ABQ0LJP8|A0ABQ0LJP8_MYCCL	0	0	i
tr|A0A5C3M6E2|A0A5C3M6E2_9AGAR	0	Y	n6-17c24/25o
tr|A0A5N7DES4|A0A5N7DES4_9EURO	0	0	i
tr|A0A1J7IN71|A0A1J7IN71_9PEZI	0	Y	n4-15c22/23o
tr|A0A8H3DDM5|A0A8H3DDM5_9AGAM	0	Y	n27-38c43/44o
tr|Q9P8M0|Q9P8M0_LEPMC	0	Y	n3-14c19/20o
tr|A0AAX6MVX3|A0AAX6MVX3_9PEZI	0	Y	n2-12c16/17o
tr|A0A1M2W4D3|A0A1M2W4D3_TRAPU	0	Y	n6-17c22/23o
tr|A0A438MWZ8|A0A438MWZ8_EXOME	0	0	i
tr|A0A9P6GLC4|A0A9P6GLC4_9PLEO	1	Y	n3-14c18/19o921-942i
tr|A0A8S0XS50|A0A8S0XS50_CYCAE	0	Y	n7-18c29/30o
tr|I2FSF7|I2FSF7_USTHO	1	0	i242-263o
tr|A0A0U5CR77|A0A0U5CR77_ASPCI	0	0	i
tr|A0AAD2Q0M1|A0AAD2Q0M1_9AGAR	1	0	i100-124o
tr|E0VRA2|E0VRA2_PEDHC	0	0	i
tr|A0A0J0XJZ7|A0A0J0XJZ7_9TREE	1	Y	n6-17c21/22o489-513i
tr|W4KQY2|W4KQY2_HETIT	0	Y	n3-14c19/20o
tr|A0A8K0LBN2|A0A8K0LBN2_9PEZI	0	Y	n2-13c18/19o
tr|A0A4Q2DT24|A0A4Q2DT24_9AGAR	0	Y	n8-23c31/32o
tr|A0AAD5Z056|A0AAD5Z056_9AGAR	0	Y	n4-15c20/21o
tr|A0AAI8VAG1|A0AAI8VAG1_9PEZI	0	Y	n4-15c20/21o
tr|A0A9W8P538|A0A9W8P538_9AGAR	0	0	i
tr|G3JS07|G3JS07_CORMM	0	0	i
tr|A0A8H5CGA9|A0A8H5CGA9_9AGAR	0	Y	n7-17c22/23o
tr|A0A0F4GNH4|A0A0F4GNH4_9PEZI	0	Y	n6-15c20/21o
tr|U4LMY4|U4LMY4_PYROM	0	Y	n3-14c18/19o
tr|A0AAN6QBA4|A0AAN6QBA4_9PEZI	0	0	i
tr|A0A3M7AL13|A0A3M7AL13_HORWE	1	0	i36-55o
tr|A0AAN7TEI5|A0AAN7TEI5_9PEZI	0	Y	n11-22c30/31o
tr|A1CYM3|A1CYM3_NEOFI	0	Y	n6-17c22/23o
tr|A0A9N9PVU3|A0A9N9PVU3_9HELO	0	0	i
tr|A0A8H7F6K3|A0A8H7F6K3_AGABI	0	Y	n6-16c20/21o
tr|A0AAD4HZY9|A0AAD4HZY9_9PEZI	0	Y	n4-15c23/24o
tr|A0AAD7CDG2|A0AAD7CDG2_MYCRO	0	Y	n3-14c19/20o
tr|A0A6A6V4I9|A0A6A6V4I9_9PLEO	0	Y	n2-13c17/18o
tr|A0A084QZA6|A0A084QZA6_STAC4	0	Y	n4-15c21/22o
tr|A0A2H3EJY9|A0A2H3EJY9_ARMGA	0	Y	n5-15c19/20o
tr|M2PXP4|M2PXP4_CERS8	0	0	i
tr|A0A9W9ST00|A0A9W9ST00_9EURO	0	0	i
tr|A0A9N9UXE2|A0A9N9UXE2_9HYPO	0	Y	n3-14c19/20o
tr|L8WYF8|L8WYF8_THACA	3	0	i301-324o385-404i463-486o
tr|A0AA40BF17|A0AA40BF17_9PEZI	0	Y	n4-11c16/17o
tr|A0A7R7XBJ4|A0A7R7XBJ4_9EURO	0	Y	n4-15c20/21o
tr|A0A2T2P668|A0A2T2P668_CORCC	0	Y	n5-15c20/21o
tr|A0AAE0HL51|A0AAE0HL51_9PEZI	0	Y	n3-15c19/20o
tr|A0AAD8PKY4|A0AAD8PKY4_9PEZI	0	0	i
tr|A0A1F5NQC2|A0A1F5NQC2_9BACT	0	Y	n12-23c28/29o
tr|A0A0B7KIB4|A0A0B7KIB4_BIOOC	0	0	i
tr|A0A6G1IHV2|A0A6G1IHV2_9PLEO	0	Y	n12-23c28/29o
tr|A0A0U5FZI7|A0A0U5FZI7_ASPCI	0	0	i
tr|A0AAJ0CUW9|A0AAJ0CUW9_9HYPO	0	Y	n5-13c18/19o
tr|A0A8K0TR36|A0A8K0TR36_9PEZI	0	Y	n3-13c18/19o
tr|A0ABR0LQH9|A0ABR0LQH9_9PEZI	0	Y	n3-14c20/21o
tr|A0A427YI86|A0A427YI86_9TREE	1	0	i131-153o
tr|A0AAD5YNT7|A0AAD5YNT7_9AGAR	2	0	i150-167o179-198i
tr|A0A9P7ULL0|A0A9P7ULL0_9AGAR	1	0	i126-149o
tr|A0A9W8K8M3|A0A9W8K8M3_9AGAR	0	Y	n4-14c19/20o
tr|A0A0C9YBT1|A0A0C9YBT1_9AGAM	0	Y	n7-18c23/24o
tr|A0AAD6SW87|A0AAD6SW87_9AGAR	0	Y	n23-33c38/39o
tr|M5FUA5|M5FUA5_DACPD	1	0	i34-57o
tr|A0A9P8VAY7|A0A9P8VAY7_9PEZI	0	0	i
tr|M3AC82|M3AC82_PSEFD	0	0	i
tr|A0A6A5ZKA7|A0A6A5ZKA7_9PLEO	0	Y	n4-12c17/18o
tr|A0A427XD23|A0A427XD23_9TREE	0	0	i
sp|Q02290|XYNB_NEOPA	0	Y	n9-16c20/21o
tr|C9SJF0|C9SJF0_VERA1	0	0	i
tr|A0A5C3EYT4|A0A5C3EYT4_9BASI	0	Y	n3-21c26/27o
tr|J3NS10|J3NS10_GAET3	0	Y	n3-10c15/16o
tr|A0AA38HGT7|A0AA38HGT7_9TREE	1	0	i182-205o
tr|A0A9P4GV73|A0A9P4GV73_9PLEO	0	Y	n6-17c22/23o
tr|A0A2H4R4J8|A0A2H4R4J8_TALAM	0	Y	n4-15c20/21o
tr|A0A4Z1NW17|A0A4Z1NW17_9PEZI	0	Y	n7-18c23/24o
tr|B0XTB4|B0XTB4_ASPFC	0	0	i
tr|A0A4Y7THU3|A0A4Y7THU3_COPMI	0	Y	n6-16c21/22o
tr|A0A437A8I5|A0A437A8I5_9PEZI	0	Y	n5-16c23/24o
tr|A0A7C8MAE2|A0A7C8MAE2_9PLEO	1	0	i292-313o
tr|A0AAE0IU43|A0AAE0IU43_9PEZI	0	Y	n6-14c22/23o
tr|A0A8H4QPJ6|A0A8H4QPJ6_9AGAR	2	Y	n8-20c25/26o35-51i324-343o
tr|A0AA39ZAE4|A0AA39ZAE4_9PEZI	1	0	o31-49i
tr|W9I183|W9I183_FUSOX	0	0	i
tr|A0A9P3CAP5|A0A9P3CAP5_9PEZI	0	0	i
tr|G2QDN2|G2QDN2_THET4	0	Y	n2-12c17/18o
tr|A0A9P4Y2J9|A0A9P4Y2J9_CRYP1	1	0	i60-83o
tr|A0AAD5S9F6|A0AAD5S9F6_9FUNG	0	Y	n5-13c18/19o
tr|A0A0L0NBN5|A0A0L0NBN5_TOLOC	0	Y	n4-12c17/18o
tr|A0AAQ3M9L5|A0AAQ3M9L5_9PEZI	0	0	i
tr|A0AA38S4L1|A0AA38S4L1_9PEZI	0	Y	n3-13c17/18o
tr|A0A3N4KBI6|A0A3N4KBI6_9PEZI	0	Y	n6-17c23/24o
tr|A0A9P5Y717|A0A9P5Y717_9AGAR	0	Y	n2-11c19/20o
tr|A0A4T0B4Y2|A0A4T0B4Y2_AURPU	1	0	i203-224o
tr|A0A364NBY1|A0A364NBY1_STELY	0	Y	n5-13c18/19o
tr|A0A841DU41|A0A841DU41_9ACTN	0	0	i
tr|A0A8H4WTS4|A0A8H4WTS4_9HYPO	0	0	i
tr|A0A9P9WNZ6|A0A9P9WNZ6_9PEZI	0	0	i
tr|A0A8H5G7W2|A0A8H5G7W2_9AGAR	0	Y	n4-13c18/19o
tr|A0A024SCZ4|A0A024SCZ4_HYPJR	0	Y	n4-12c17/18o
tr|A0A2J6T346|A0A2J6T346_9HELO	0	0	i
tr|G2QD40|G2QD40_THET4	0	0	i
tr|A0A2P7YMZ3|A0A2P7YMZ3_9PEZI	0	0	i
tr|A0A066VUY1|A0A066VUY1_TILAU	0	Y	n8-21c29/30o
tr|A0A1M2V3C0|A0A1M2V3C0_TRAPU	0	0	i
tr|A0A5M3YS30|A0A5M3YS30_ASPTE	2	Y	n4-15c20/21o1161-1180i1201-1220o
tr|A0AAN4PQL8|A0AAN4PQL8_ASPLE	0	0	i
tr|A0A5N5DS00|A0A5N5DS00_9PEZI	0	Y	n8-19c25/26o
tr|A0A6A6D216|A0A6A6D216_ZASCE	0	Y	n5-16c21/22o
tr|A0A7C8MS84|A0A7C8MS84_9PEZI	0	Y	n2-13c18/19o
tr|W6Z781|W6Z781_COCMI	0	Y	n5-15c20/21o
tr|A0A5C5FX26|A0A5C5FX26_9BASI	10	Y	n6-16c21/22o1031-1050i1313-1332o1344-1367i1379-1398o1418-1439i1557-1582o1632-1650i1671-1692o1712-1730i1751-1770o
tr|A0A369JKP7|A0A369JKP7_HYPMA	0	0	i
tr|A0A9P8VJK2|A0A9P8VJK2_9PEZI	0	Y	n4-12c17/18o
tr|A0A383V0T0|A0A383V0T0_BLUHO	0	Y	n3-13c18/19o
tr|A0A238F758|A0A238F758_9BASI	1	0	o6-27i
tr|A0A8H6QVA7|A0A8H6QVA7_9EURO	0	Y	n4-13c18/19o
tr|A0A5C3MJ14|A0A5C3MJ14_9AGAR	0	Y	n3-14c18/19o
tr|A0A5N6TYZ7|A0A5N6TYZ7_9EURO	0	Y	n3-14c19/20o
tr|A0A6A6Y7Y1|A0A6A6Y7Y1_9PEZI	0	Y	n3-16c24/25o
tr|A0ABU8VYF1|A0ABU8VYF1_9BURK	0	0	i
tr|A0AAV5A6Q8|A0AAV5A6Q8_9AGAM	0	0	i
tr|A0A1Y1X4D3|A0A1Y1X4D3_9FUNG	0	Y	n4-15c20/21o
tr|A0A0D2CNQ3|A0A0D2CNQ3_9EURO	0	Y	n12-23c28/29o
tr|M2V5M6|M2V5M6_COCH5	9	0	o34-53i80-101o107-126i133-153o173-191i203-228o240-259i266-292o298-319i
tr|A0A370P3Z6|A0A370P3Z6_ASPPH	0	0	i
tr|A0A6A6R933|A0A6A6R933_9PEZI	0	0	i
tr|A0AAN6MKD0|A0AAN6MKD0_9PEZI	0	Y	n5-16c21/22o
tr|A0A9P5D2G0|A0A9P5D2G0_9HYPO	0	0	i
tr|G4TUZ2|G4TUZ2_SERID	0	Y	n2-13c20/21o
tr|A0A9W9XFG2|A0A9W9XFG2_9EURO	0	Y	n3-14c20/21o
tr|A0A9P8GIT1|A0A9P8GIT1_AURME	0	Y	n5-16c20/21o
tr|G4TQG9|G4TQG9_SERID	1	0	i138-163o
tr|A0A8H4RAK0|A0A8H4RAK0_9HELO	0	Y	n7-14c19/20o
tr|A0ABQ8NML2|A0ABQ8NML2_PYRGI	0	Y	n4-12c17/18o
tr|A0A060SFW2|A0A060SFW2_PYCCI	0	0	i
tr|A0A8H6NYV8|A0A8H6NYV8_9PEZI	0	Y	n3-15c20/21o
tr|A0A8H6D0K7|A0A8H6D0K7_9HYPO	0	0	i
tr|A0AAE0I3G6|A0AAE0I3G6_9PEZI	0	Y	n4-15c22/23o
tr|A0A6V7PPY9|A0A6V7PPY9_ANACO	0	0	i
tr|A0A0G2G231|A0A0G2G231_9PEZI	5	Y	n6-17c23/24o599-619i722-743o755-775i915-936o942-966i
tr|A0AAN6W0E8|A0AAN6W0E8_9PEZI	0	Y	n6-17c22/23o
tr|A8N527|A8N527_COPC7	1	0	i96-119o
tr|A0A0D7BRR2|A0A0D7BRR2_9AGAR	0	0	i
tr|A0A9W9G6I1|A0A9W9G6I1_9EURO	0	0	i
tr|A0A7R7ZMQ9|A0A7R7ZMQ9_ASPCH	0	Y	n6-14c19/20o
tr|A0A409XWS5|A0A409XWS5_9AGAR	0	0	i
tr|A0A8J5NRE4|A0A8J5NRE4_FUSOX	0	Y	n10-22c34/35o
tr|A0A1H9AS55|A0A1H9AS55_9FLAO	0	Y	n4-15c20/21o
tr|A0A395ISP6|A0A395ISP6_9HELO	0	Y	n14-24c28/29o
tr|A0A9N9YRG1|A0A9N9YRG1_9HYPO	0	Y	n6-14c18/19o
tr|A0AA38HAC9|A0AA38HAC9_9TREE	1	0	o599-618i
tr|A0A1V2KZE9|A0A1V2KZE9_CYBFA	0	Y	n5-16c24/25o
tr|A0A8H4W112|A0A8H4W112_9HELO	0	Y	n5-16c21/22o
tr|A0A423WCL9|A0A423WCL9_9PEZI	0	Y	n13-24c34/35o
tr|A0A8H5IXK3|A0A8H5IXK3_9HYPO	0	Y	n3-13c17/18o
tr|A0A5C3P3F7|A0A5C3P3F7_9APHY	0	Y	n4-15c22/23o
tr|A0A9P9IJT0|A0A9P9IJT0_9PLEO	0	Y	n3-14c22/23o
tr|W3WXZ0|W3WXZ0_PESFW	1	0	i88-107o
tr|A0A5C3EM74|A0A5C3EM74_9BASI	0	Y	n6-14c19/20o
tr|A0A167HBD8|A0A167HBD8_CALVF	0	Y	n6-17c22/23o
tr|S7Q613|S7Q613_GLOTA	0	0	i
tr|A0A9W8HWB9|A0A9W8HWB9_9FUNG	0	0	i
tr|A0A319DTM8|A0A319DTM8_ASPSB	0	0	i
tr|A0A2N6N8A2|A0A2N6N8A2_BEABA	0	0	i
tr|A0A1Y2D9S3|A0A1Y2D9S3_9FUNG	0	Y	n3-16c24/25o
tr|G9MV41|G9MV41_HYPVG	0	0	i
tr|A0A2N3NIV3|A0A2N3NIV3_9PEZI	0	Y	n7-18c23/24o
tr|A0A0L6VEU6|A0A0L6VEU6_9BASI	1	0	i50-72o
tr|A0A165FHF3|A0A165FHF3_9BASI	0	Y	n8-19c25/26o
tr|N4VNC9|N4VNC9_COLOR	0	Y	n5-12c17/18o
tr|A0A9P7G7A8|A0A9P7G7A8_9AGAR	0	Y	n4-15c19/20o
tr|A0A8H6RXS5|A0A8H6RXS5_MYCCL	0	Y	n3-14c20/21o
tr|A0A2N3NK33|A0A2N3NK33_9PEZI	0	0	i
tr|S3CQ47|S3CQ47_OPHP1	0	Y	n4-15c21/22o
tr|A0AA37L6T9|A0AA37L6T9_9PEZI	0	Y	n7-17c21/22o
tr|A0AAD7IKL8|A0AAD7IKL8_9AGAR	0	Y	n5-16c21/22o
tr|F8MWJ7|F8MWJ7_NEUT8	0	Y	n3-13c18/19o
tr|A0A5N5QNG4|A0A5N5QNG4_9AGAM	9	Y	n5-14c19/20o29-49i56-76o82-99i188-207o213-230i242-269o299-320i332-354o360-377i
tr|A0AAJ0FF49|A0AAJ0FF49_9PEZI	0	Y	n5-16c21/22o
tr|A0A9P5BR76|A0A9P5BR76_COLSI	0	Y	n3-15c20/21o
tr|K5X5K9|K5X5K9_AGABU	0	Y	n3-13c18/19o
tr|A0A8H4N218|A0A8H4N218_9PEZI	0	Y	n4-15c20/21o
tr|A0A9P5TRB0|A0A9P5TRB0_GYMJU	16	0	i97-116o122-141i197-217o229-250i262-284o304-325i337-356o411-433i464-484o490-510i522-543o549-574i595-615o627-649i661-681o693-716i
tr|A0A4T0FN34|A0A4T0FN34_9BASI	0	0	i
tr|A0A9P1MA92|A0A9P1MA92_9PEZI	0	0	i
tr|A0AAD6J2V6|A0AAD6J2V6_ARTDA	0	Y	n5-12c17/18o
tr|B6HQ23|B6HQ23_PENRW	0	0	i
tr|A0A086TLB3|A0A086TLB3_9FUNG	1	0	i16-35o
tr|A0A0D2CYN3|A0A0D2CYN3_9EURO	0	Y	n7-18c25/26o
tr|A0A163M0S0|A0A163M0S0_DIDRA	0	0	i
tr|V5EQ47|V5EQ47_KALBG	0	Y	n3-14c20/21o
tr|A0A9N9YS92|A0A9N9YS92_9HYPO	0	0	i
tr|A0A0B4GQH4|A0A0B4GQH4_METGA	0	Y	n4-14c19/20o
tr|A0A6G1J710|A0A6G1J710_9PLEO	0	Y	n2-11c16/17o
tr|A0A9P9IFF5|A0A9P9IFF5_9PLEO	0	Y	n7-15c20/21o
tr|A0A2D0Q667|A0A2D0Q667_ICTPU	1	0	i21-40o
tr|R9P140|R9P140_PSEHS	0	0	i
tr|A0A9W8UUJ0|A0A9W8UUJ0_9HYPO	0	Y	n3-11c17/18o
tr|A0A8H6XZD2|A0A8H6XZD2_9AGAR	0	Y	n2-12c17/18o
tr|A0A1D2JQG4|A0A1D2JQG4_PARBR	1	0	i44-67o
tr|A0A9P4PTG2|A0A9P4PTG2_9PLEO	0	Y	n5-15c20/21o
tr|A0A4S8MU60|A0A4S8MU60_DENBC	0	0	i
tr|A0A9P8SY63|A0A9P8SY63_ASPFM	0	0	i
tr|A0A1R3S0M1|A0A1R3S0M1_ASPC5	0	Y	n14-25c30/31o
tr|A0A8H6Y2G7|A0A8H6Y2G7_9AGAR	0	0	i
tr|A8N842|A8N842_COPC7	0	Y	n5-15c22/23o
sp|A2QPK4|BGLD_ASPNC	0	Y	n4-15c20/21o
tr|A0ABY7QHM6|A0ABY7QHM6_9FLAO	0	Y	n12-23c28/29o
tr|A0A2P1G1K5|A0A2P1G1K5_ASPGL	0	Y	n3-13c18/19o
tr|A0A3D8RQW6|A0A3D8RQW6_9EURO	0	0	i
tr|A0AAN7CGQ8|A0AAN7CGQ8_9PEZI	1	0	o1435-1457i
tr|A0A1V6T9F7|A0A1V6T9F7_9EURO	0	0	i
tr|A0AAE0H9D4|A0AAE0H9D4_9PEZI	0	0	i
tr|A0A0B2WXR8|A0A0B2WXR8_METAS	0	0	i
tr|A0A1Y1X0L2|A0A1Y1X0L2_9FUNG	0	0	i
tr|A0A9W9H1D1|A0A9W9H1D1_9EURO	0	0	i
tr|A0A1Y2FH25|A0A1Y2FH25_PROLT	0	0	i
tr|A0A2K1QK31|A0A2K1QK31_9PEZI	0	Y	n3-13c17/18o
tr|F4SC40|F4SC40_MELLP	0	Y	n4-14c18/19o
tr|A0A0C3A2S2|A0A0C3A2S2_9AGAM	1	0	o3355-3373i
tr|A0A072PLD5|A0A072PLD5_9EURO	0	0	i
tr|V2XX86|V2XX86_MONRO	0	Y	n3-14c19/20o
tr|A0AAN7T0I8|A0AAN7T0I8_9EURO	8	0	i236-256o268-285i297-316o336-354i375-393o435-456i490-510o522-541i
tr|A0A9Q8PIE3|A0A9Q8PIE3_PASFU	0	Y	n3-11c16/17o
tr|A0A1L9SU46|A0A1L9SU46_9EURO	0	0	i
tr|A0A0H1BPK5|A0A0H1BPK5_9EURO	1	0	i55-78o
tr|G4T8J2|G4T8J2_SERID	0	Y	n4-15c20/21o
tr|A0A9P9D9Z7|A0A9P9D9Z7_9HYPO	0	0	i
tr|A0A0K3C404|A0A0K3C404_RHOTO	0	Y	n5-16c23/24o
tr|A0A9W5YTJ9|A0A9W5YTJ9_9EURO	0	Y	n4-15c20/21o
tr|I3XLE8|I3XLE8_CTEID	0	0	i
tr|A0A1R1X2H8|A0A1R1X2H8_9FUNG	0	0	i
tr|A0AAN6SS12|A0AAN6SS12_9PEZI	1	Y	n7-15c20/21o387-407i
tr|A0AA40BVP6|A0AA40BVP6_9PEZI	0	Y	n3-13c18/19o
tr|A0A2V1E3E9|A0A2V1E3E9_9PLEO	0	0	i
tr|U5H833|U5H833_USTV1	1	0	i170-192o
tr|A0A5N7ATS4|A0A5N7ATS4_9EURO	0	Y	n4-11c16/17o
tr|A0AAJ8KYJ2|A0AAJ8KYJ2_9TREE	0	0	i
tr|A0A067M5X0|A0A067M5X0_BOTB1	0	Y	n5-16c23/24o
tr|A0A9W9G332|A0A9W9G332_9EURO	0	Y	n3-13c18/19o
tr|A0AAD9YA06|A0AAD9YA06_COLKA	0	0	i
tr|A0AAE8MZ44|A0AAE8MZ44_9PEZI	0	Y	n6-16c21/22o
tr|A0A4Y7QMB1|A0A4Y7QMB1_9AGAM	0	Y	n3-13c18/19o
tr|A0A165JBY4|A0A165JBY4_9BASI	0	Y	n3-13c18/19o
tr|A0AAD6ZZ90|A0AAD6ZZ90_9AGAR	0	Y	n2-10c16/17o
tr|A0ABY7CFM9|A0ABY7CFM9_9BASI	1	0	i96-118o
tr|A0A6A5WY24|A0A6A5WY24_9PLEO	0	0	i
tr|A0A9P6UHM8|A0A9P6UHM8_9FUNG	0	0	i
tr|A0AA48L970|A0AA48L970_9TREE	0	Y	n3-12c17/18o
tr|A0A061H2W8|A0A061H2W8_9BASI	1	0	i212-233o
tr|A0A4Q2DP28|A0A4Q2DP28_9AGAR	0	Y	n3-13c18/19o
tr|A0A2N5VH11|A0A2N5VH11_9BASI	1	0	i124-146o
tr|A0A316YS24|A0A316YS24_9BASI	1	0	i12-38o
tr|A0A9P9DZC5|A0A9P9DZC5_9PLEO	0	Y	n6-17c22/23o
tr|W6YGD3|W6YGD3_COCC2	0	Y	n3-15c20/21o
tr|A0A8H4GHN3|A0A8H4GHN3_9EURO	0	Y	n6-17c21/22o
[truncated: 13,122 more rows]
